# Supplementary material for: Mass spectrometry-based thermostability profiling of virus-derived MHC peptide complexes serves as an effective predictor of immunogenicity
Source: Research Square preprint supplement (doi:10.21203/rs.3.rs-5824434/v1), 2025-02-03
Supplement: Supplementary file 1 [file 09944aa16d3f4bd9300b113e.xlsx]

## Sheet: DBsearch_MSFragger_MSBooster
Peptide	Prev AA	Next AA	Peptide Length	Charges	Probability	Spectral Count	Intensity	Assigned Modifications	Observed Modifications	Protein	Protein ID	Entry Name	Gene	Protein Description	Mapped Genes	Mapped Proteins
AAAAASSPAGLL	A	A	12	2	0.9362	1	0			sp|Q99MA9|NKX61_MOUSE	Q99MA9	NKX61_MOUSE	Nkx6-1	Homeobox protein Nkx-6.1
AAADITSSL	S	S	9	2	0.8804	1	0			sp|Q8CD54|PIEZ2_MOUSE	Q8CD54	PIEZ2_MOUSE	Piezo2	Piezo-type mechanosensitive ion channel component 2
AAAENKVAV	F	K	9	2	0.9943	2	0			sp|Q9R1X5|MRP5_MOUSE	Q9R1X5	MRP5_MOUSE	Abcc5	ATP-binding cassette sub-family C member 5
AAAFNTTVA	M	A	9	2	0.9889	2	0			sp|Q99LD4|CSN1_MOUSE	Q99LD4	CSN1_MOUSE	Gps1	COP9 signalosome complex subunit 1
AAAGRLLPLL	Q	L	10	2	0.9862	3	0			sp|Q3TWN3|CNNM2_MOUSE	Q3TWN3	CNNM2_MOUSE	Cnnm2	Metal transporter CNNM2
AAAIFYSISL	I	T	10	2	0.9505	1	0			sp|Q99J39|DCMC_MOUSE	Q99J39	DCMC_MOUSE	Mlycd	Malonyl-CoA decarboxylase, mitochondrial
AAAKNGTSL	A	N	9	2	0.9986	7	0			sp|O88811|STAM2_MOUSE	O88811	STAM2_MOUSE	Stam2	Signal transducing adapter molecule 2
AAAKNLSDMTL	M	A	11	2	1	7	0	9M(15.9949)		sp|Q8K1H7|T11L2_MOUSE	Q8K1H7	T11L2_MOUSE	Tcp11l2	T-complex protein 11-like protein 2
AAARGLTLL	K	F	9	2	0.9169	1	0			sp|O89023|TPP1_MOUSE	O89023	TPP1_MOUSE	Tpp1	Tripeptidyl-peptidase 1
AAARNSLYDM	S	A	10	2	0.9997	3	0	10M(15.9949)		sp|Q8C7Q4|RBM4_MOUSE	Q8C7Q4	RBM4_MOUSE	Rbm4	RNA-binding protein 4
AAARPINATM	A	K	10	2	0.9985	1	0	10M(15.9949)		sp|Q8BYR2|LATS1_MOUSE	Q8BYR2	LATS1_MOUSE	Lats1	Serine/threonine-protein kinase LATS1
AAASNTNTL	E	N	9	2	0.997	1	0			sp|Q8VHW2|CCG8_MOUSE	Q8VHW2	CCG8_MOUSE	Cacng8	Voltage-dependent calcium channel gamma-8 subunit
AAASRVAAL	S	R	9	2	0.9315	1	0			sp|Q9JJF3|RIOX1_MOUSE	Q9JJF3	RIOX1_MOUSE	Riox1	Ribosomal oxygenase 1
AAATGHTVV	V	L	9	2	0.9943	1	0			sp|Q61425|HCDH_MOUSE	Q61425	HCDH_MOUSE	Hadh	Hydroxyacyl-coenzyme A dehydrogenase, mitochondrial
AAATNPSWL	L	L	9	2	0.9999	2	0			sp|Q9QXH4|ITAX_MOUSE	Q9QXH4	ITAX_MOUSE	Itgax	Integrin alpha-X
AAATSVHVV	I	A	9	2	0.9915	2	0			sp|Q3UIA2|RHG17_MOUSE	Q3UIA2	RHG17_MOUSE	Arhgap17	Rho GTPase-activating protein 17
AADQNFDYM	D	F	9	2	0.9912	1	0	9M(15.9949)		sp|P35276|RAB3D_MOUSE	P35276	RAB3D_MOUSE	Rab3d	Ras-related protein Rab-3D
AADTFTAL	V	K	8	2	0.9039	1	0			sp|Q9JKF1|IQGA1_MOUSE	Q9JKF1	IQGA1_MOUSE	Iqgap1	Ras GTPase-activating-like protein IQGAP1
AAELNSETL	V	Q	9	2	0.9613	1	0			sp|Q9D2Q2|TRM44_MOUSE	Q9D2Q2	TRM44_MOUSE	Trmt44	Probable tRNA (uracil-O(2)-)-methyltransferase
AAEVNPESL	E	A	9	2	0.9693	2	0			sp|Q5SSH7|ZZEF1_MOUSE	Q5SSH7	ZZEF1_MOUSE	Zzef1	Zinc finger ZZ-type and EF-hand domain-containing protein 1
AAFAGLMYL	P	F	9	2	0.8964	1	0	7M(15.9949)		sp|P30355|AL5AP_MOUSE	P30355	AL5AP_MOUSE	Alox5ap	Arachidonate 5-lipoxygenase-activating protein
AAFAMVTHV	R	K	9	2	0.8071	1	0	5M(15.9949)		sp|Q80YV3|TRRAP_MOUSE	Q80YV3	TRRAP_MOUSE	Trrap	Transformation/transcription domain-associated protein
AAFDFTSM	V	M	8	2	0.9628	1	0	8M(15.9949)		sp|Q8VDP3|MICA1_MOUSE	Q8VDP3	MICA1_MOUSE	Mical1	[F-actin]-monooxygenase MICAL1
AAFEFINSL	E	L	9	2	0.9997	37	0			sp|P26673|A47_VACCW	P26673	A47_VACCW	VACWR173	Protein A47
AAFGKPINF	A	-	9	2	0.9342	1	0			sp|O08749|DLDH_MOUSE	O08749	DLDH_MOUSE	Dld	Dihydrolipoyl dehydrogenase, mitochondrial
AAFGLSEAGFNTA	R	C	13	2	0.9996	1	0			sp|Q8K2B3|SDHA_MOUSE	Q8K2B3	SDHA_MOUSE	Sdha	Succinate dehydrogenase [ubiquinone] flavoprotein subunit, mitochondrial
AAFIVSRL	G	A	8	2	0.9994	1	0			sp|Q9D6K9|CERS5_MOUSE	Q9D6K9	CERS5_MOUSE	Cers5	Ceramide synthase 5
AAFNQLPHL	S	A	9	2	0.9998	8	0			sp|Q7TN98|CPEB4_MOUSE	Q7TN98	CPEB4_MOUSE	Cpeb4	Cytoplasmic polyadenylation element-binding protein 4
AAFPGASLYL	S	P	10	2	1	10	0			sp|Q9DCP9|DAZP2_MOUSE	Q9DCP9	DAZP2_MOUSE	Dazap2	DAZ-associated protein 2
AAFPGASLYLPM	S	A	12	2	0.9952	3	0	12M(15.9949)		sp|Q9DCP9|DAZP2_MOUSE	Q9DCP9	DAZP2_MOUSE	Dazap2	DAZ-associated protein 2
AAFQNVLTHV	D	C	10	2	0.972	1	0			sp|Q9D5T0|ATAD1_MOUSE	Q9D5T0	ATAD1_MOUSE	Atad1	Outer mitochondrial transmembrane helix translocase
AAFQYGIKM	K	S	9	2	0.9936	1	0	9M(15.9949)		sp|Q9Z1M8|RED_MOUSE	Q9Z1M8	RED_MOUSE	Ik	Protein Red
AAFRNFSDEI	V	R	10	2	0.9998	1	0			sp|Q8BJ71|NUP93_MOUSE	Q8BJ71	NUP93_MOUSE	Nup93	Nuclear pore complex protein Nup93
AAFTADPLSLL	V	R	11	2	0.9994	6	0			sp|Q4LDD4|ARAP1_MOUSE	Q4LDD4	ARAP1_MOUSE	Arap1	Arf-GAP with Rho-GAP domain, ANK repeat and PH domain-containing protein 1
AAFTYDHI	D	Q	8	2	0.9155	1	0			sp|Q8C3J5|DOCK2_MOUSE	Q8C3J5	DOCK2_MOUSE	Dock2	Dedicator of cytokinesis protein 2
AAGENPSQTL	P	K	10	2	0.9859	1	0			sp|P07903|ERCC1_MOUSE	P07903	ERCC1_MOUSE	Ercc1	DNA excision repair protein ERCC-1
AAGINRDSL	N	L	9	2	0.9987	5	0			sp|Q91VT4|CBR4_MOUSE	Q91VT4	CBR4_MOUSE	Cbr4	3-oxoacyl-[acyl-carrier-protein] reductase
AAGINVEII	Q	H	9	2	0.992	19	0			sp|Q0GNC1|INF2_MOUSE	Q0GNC1	INF2_MOUSE	Inf2	Inverted formin-2
AAGSNQVTL	P	P	9	2	0.999	2	0			sp|Q8C0P0|GWL_MOUSE	Q8C0P0	GWL_MOUSE	Mastl	Serine/threonine-protein kinase greatwall
AAGTNKENL	G	G	9	2	0.991	6	0			sp|Q8CGN4|BCOR_MOUSE	Q8CGN4	BCOR_MOUSE	Bcor	BCL-6 corepressor
AAGVGDMVM	P	A	9	2	0.9998	20	0	7M(15.9949), 9M(15.9949)		sp|P62830|RL23_MOUSE	P62830	RL23_MOUSE	Rpl23	60S ribosomal protein L23
AAGVNSEMV	F	K	9	2	0.999	3	0	8M(15.9949)		sp|Q8BFQ4|WDR82_MOUSE	Q8BFQ4	WDR82_MOUSE	Wdr82	WD repeat-containing protein 82
AAGVSVEPF	K	W	9	2	0.9938	2	0			sp|P47955|RLA1_MOUSE	P47955	RLA1_MOUSE	Rplp1	60S acidic ribosomal protein P1
AAIANSMNYL	T	T	10	2	0.9996	2	0	7M(15.9949)		sp|Q6P5E4|UGGG1_MOUSE	Q6P5E4	UGGG1_MOUSE	Uggt1	UDP-glucose:glycoprotein glucosyltransferase 1
AAIDYQKV	R	V	8	2	0.9837	2	0			sp|Q3THS6|METK2_MOUSE	Q3THS6	METK2_MOUSE	Mat2a	S-adenosylmethionine synthase isoform type-2
AAIEAMNGQYL	D	C	11	2	1	33	0	6M(15.9949)		sp|Q8QZY9|SF3B4_MOUSE	Q8QZY9	SF3B4_MOUSE	Sf3b4	Splicing factor 3B subunit 4
AAIEDSPHTL	P	G	10	2	0.9825	1	0			sp|Q80YR2|FHI2B_MOUSE	Q80YR2	FHI2B_MOUSE	Fhip2b	FHF complex subunit HOOK interacting protein 2B
AAIENIEHL	D	L	9	2	0.9992	9	0			sp|Q6PB66|LPPRC_MOUSE	Q6PB66	LPPRC_MOUSE	Lrpprc	Leucine-rich PPR motif-containing protein, mitochondrial
AAIGNQLYV	S	F	9	2	0.9837	2	0			sp|Q8VCH5|RABEK_MOUSE	Q8VCH5	RABEK_MOUSE	Rabepk	Rab9 effector protein with kelch motifs
AAIKDNVVI	E	V	9	2	0.9493	4	0			sp|Q9JKC8|AP3M1_MOUSE	Q9JKC8	AP3M1_MOUSE	Ap3m1	AP-3 complex subunit mu-1
AAIKLQELL	R	K	9	2	0.9951	7	0			sp|Q99PL5|RRBP1_MOUSE	Q99PL5	RRBP1_MOUSE	Rrbp1	Ribosome-binding protein 1
AAILFSERL	W	N	9	2	0.9952	2	0			sp|Q3KQJ0|TMM69_MOUSE	Q3KQJ0	TMM69_MOUSE	Tmem69	Transmembrane protein 69
AAINNRLEL	W	V	9	2	0.9854	3	0			sp|Q9CWU2|ZDH13_MOUSE	Q9CWU2	ZDH13_MOUSE	Zdhhc13	Palmitoyltransferase ZDHHC13
AAINRGVKI	E	R	9	2	0.9974	8	0			sp|P04021|F13_VACCW	P04021	F13_VACCW	VACWR052	Envelope phospholipase F13
AAIPADMAAVL	V	Q	11	2	0.7306	1	0			sp|F6ZDS4|TPR_MOUSE	F6ZDS4	TPR_MOUSE	Tpr	Nucleoprotein TPR
AAIPEFMNLGPL	L	F	12	3	0.7473	1	0	7M(15.9949)		sp|Q9QXK3|COPG2_MOUSE	Q9QXK3	COPG2_MOUSE	Copg2	Coatomer subunit gamma-2
AAIQGAVAM	T	A	9	2	0.9967	8	0	9M(15.9949)		sp|Q6ZPJ3|UBE2O_MOUSE	Q6ZPJ3	UBE2O_MOUSE	Ube2o	(E3-independent) E2 ubiquitin-conjugating enzyme UBE2O
AAIRDGELI	P	C	9	2	0.9816	1	0			sp|Q5SPL2|PHF12_MOUSE	Q5SPL2	PHF12_MOUSE	Phf12	PHD finger protein 12
AAIRGNDVI	D	F	9	2	0.999	40	0	6N(0.9840)		sp|P04305|D5_VACCW	P04305	D5_VACCW	VACWR110	Primase D5
AAIRNYGIEL	D	A	10	2	0.9978	5	0			sp|Q9WU20|MTHR_MOUSE	Q9WU20	MTHR_MOUSE	Mthfr	Methylenetetrahydrofolate reductase
AAIRSVMGA	N	L	9	2	0.9996	1	0	7M(15.9949)		sp|O35226|PSMD4_MOUSE	O35226	PSMD4_MOUSE	Psmd4	26S proteasome non-ATPase regulatory subunit 4
AAISLATRV	V	S	9	2	0.9709	1	0			sp|Q80VY9|DHX33_MOUSE	Q80VY9	DHX33_MOUSE	Dhx33	ATP-dependent RNA helicase DHX33
AAISNKITS	K	C	9	2	0.998	1	0			sp|Q9DCL9|PUR6_MOUSE	Q9DCL9	PUR6_MOUSE	Paics	Bifunctional phosphoribosylaminoimidazole carboxylase/phosphoribosylaminoimidazole succinocarboxamide synthetase
AAITNKYQL	F	V	9	2	0.9995	17	0			sp|B2RS91|RRN3_MOUSE	B2RS91	RRN3_MOUSE	Rrn3	RNA polymerase I-specific transcription initiation factor RRN3
AAITNKYQLVF	F	C	11	2	0.9275	1	0			sp|B2RS91|RRN3_MOUSE	B2RS91	RRN3_MOUSE	Rrn3	RNA polymerase I-specific transcription initiation factor RRN3
AAIVAKQVL	L	L	9	2	0.9824	1	0			sp|P19253|RL13A_MOUSE	P19253	RL13A_MOUSE	Rpl13a	60S ribosomal protein L13a
AAIVDGDRI	A	A	9	2	0.9997	26	0			sp|Q7TT50|MRCKB_MOUSE	Q7TT50	MRCKB_MOUSE	Cdc42bpb	Serine/threonine-protein kinase MRCK beta
AAIVSPEEEL	A	D	10	2	0.9413	1	0			sp|P97287|MCL1_MOUSE	P97287	MCL1_MOUSE	Mcl1	Induced myeloid leukemia cell differentiation protein Mcl-1 homolog
AALANATVI	D	P	9	2	0.9949	2	0			sp|Q9Z2U2|ZN292_MOUSE	Q9Z2U2	ZN292_MOUSE	Zfp292	Zinc finger protein 292
AALANLDNI	Y	F	9	2	0.9986	9	0			sp|Q8K2K6|AGFG1_MOUSE	Q8K2K6	AGFG1_MOUSE	Agfg1	Arf-GAP domain and FG repeat-containing protein 1
AALDFKNV	D	S	8	2	0.9997	10	0			sp|Q8CG47|SMC4_MOUSE	Q8CG47	SMC4_MOUSE	Smc4	Structural maintenance of chromosomes protein 4
AALEFHGV	Q	A	8	2	0.7668	1	0			sp|Q80UK0|SESD1_MOUSE	Q80UK0	SESD1_MOUSE	Sestd1	SEC14 domain and spectrin repeat-containing protein 1
AALEFLNRF	A	E	9	2	0.9732	2	0			sp|Q60864|STIP1_MOUSE	Q60864	STIP1_MOUSE	Stip1	Stress-induced-phosphoprotein 1
AALEKIITV	P	S	9	2	0.9503	1	0			sp|Q8JZL3|THTPA_MOUSE	Q8JZL3	THTPA_MOUSE	Thtpa	Thiamine-triphosphatase
AALENDKTI	S	K	9	2	0.998	11	0			sp|P61965|WDR5_MOUSE	P61965	WDR5_MOUSE	Wdr5	WD repeat-containing protein 5	Wdr5b	sp|Q9D7H2|WDR5B_MOUSE
AALENDKTIKL	S	W	11	3	0.9983	2	0			sp|P61965|WDR5_MOUSE	P61965	WDR5_MOUSE	Wdr5	WD repeat-containing protein 5
AALENKVTDL	A	-	10	2	0.9977	2	0			sp|B2RXS4|PLXB2_MOUSE	B2RXS4	PLXB2_MOUSE	Plxnb2	Plexin-B2
AALENPMLL	G	N	9	2	1	15	0	7M(15.9949)		sp|Q9D906|ATG7_MOUSE	Q9D906	ATG7_MOUSE	Atg7	Ubiquitin-like modifier-activating enzyme ATG7
AALENTHLL	A	E	9	2	0.9961	6	0			sp|Q9D187|CIA2B_MOUSE	Q9D187	CIA2B_MOUSE	Ciao2b	Cytosolic iron-sulfur assembly component 2B
AALGLLDAI	E	M	9	2	0.9678	2	0			sp|E9PVA8|GCN1_MOUSE	E9PVA8	GCN1_MOUSE	Gcn1	eIF-2-alpha kinase activator GCN1
AALGMEKLV	G	A	9	2	0.95	1	0	5M(15.9949)		sp|Q80YT5|SPT20_MOUSE	Q80YT5	SPT20_MOUSE	Spata20	Spermatogenesis-associated protein 20
AALGNDPLARL	V	Q	11	2	0.9795	1	0			sp|O35126|ATN1_MOUSE	O35126	ATN1_MOUSE	Atn1	Atrophin-1
AALHNGFYP	T	S	9	2	0.9979	3	0			sp|Q91W59|RBMS1_MOUSE	Q91W59	RBMS1_MOUSE	Rbms1	RNA-binding motif, single-stranded-interacting protein 1
AALIYGKL	I	E	8	2	0.9955	3	0			sp|Q9DC23|DJC10_MOUSE	Q9DC23	DJC10_MOUSE	Dnajc10	DnaJ homolog subfamily C member 10
AALIYTSV	G	K	8	2	0.999	10	0			sp|Q6PDL0|DC1L2_MOUSE	Q6PDL0	DC1L2_MOUSE	Dync1li2	Cytoplasmic dynein 1 light intermediate chain 2	Dync1li1	sp|Q8R1Q8|DC1L1_MOUSE
AALKLGQEL	A	C	9	2	0.9999	32	0			sp|Q9JJ28|FLII_MOUSE	Q9JJ28	FLII_MOUSE	Flii	Protein flightless-1 homolog
AALKNAFSL	K	L	9	2	0.9915	2	0			sp|Q6PNC0|DMXL1_MOUSE	Q6PNC0	DMXL1_MOUSE	Dmxl1	DmX-like protein 1	Dmxl2	sp|Q8BPN8|DMXL2_MOUSE
AALKNAFSLL	K	G	10	2	0.9356	3	0			sp|Q6PNC0|DMXL1_MOUSE	Q6PNC0	DMXL1_MOUSE	Dmxl1	DmX-like protein 1	Dmxl2	sp|Q8BPN8|DMXL2_MOUSE
AALKNAGQAV	A	T	10	2	0.992	1	0			sp|Q811D0|DLG1_MOUSE	Q811D0	DLG1_MOUSE	Dlg1	Disks large homolog 1
AALKNPPINT	Q	K	10	2	0.9983	4	0			sp|Q9CPW4|ARPC5_MOUSE	Q9CPW4	ARPC5_MOUSE	Arpc5	Actin-related protein 2/3 complex subunit 5
AALLNFDEF	K	A	9	2	0.9999	15	0			sp|Q6P9Q4|FHOD1_MOUSE	Q6P9Q4	FHOD1_MOUSE	Fhod1	FH1/FH2 domain-containing protein 1
AALLNQQFL	L	C	9	2	0.9988	3	0			sp|P48455|PP2BC_MOUSE	P48455	PP2BC_MOUSE	Ppp3cc	Serine/threonine-protein phosphatase 2B catalytic subunit gamma isoform	Ppp3cb	sp|P48453|PP2BB_MOUSE
AALLNTDLV	V	A	9	2	0.9995	14	0			sp|Q91WM3|U3IP2_MOUSE	Q91WM3	U3IP2_MOUSE	Rrp9	U3 small nucleolar RNA-interacting protein 2
AALMNQQFL	L	C	9	2	0.9992	3	0	4M(15.9949)		sp|P63328|PP2BA_MOUSE	P63328	PP2BA_MOUSE	Ppp3ca	Protein phosphatase 3 catalytic subunit alpha
AALNNHVEV	L	A	9	2	0.9991	6	0			sp|Q80SY4|MIB1_MOUSE	Q80SY4	MIB1_MOUSE	Mib1	E3 ubiquitin-protein ligase MIB1
AALNNLEVKL	D	K	10	2	0.9876	1	0			sp|Q8K1B8|URP2_MOUSE	Q8K1B8	URP2_MOUSE	Fermt3	Fermitin family homolog 3
AALPKATVL	L	D	9	2	0.9889	1	0			sp|Q922Q8|LRC59_MOUSE	Q922Q8	LRC59_MOUSE	Lrrc59	Leucine-rich repeat-containing protein 59
AALPNIYEL	L	I	9	2	0.9994	6	0			sp|P49718|MCM5_MOUSE	P49718	MCM5_MOUSE	Mcm5	DNA replication licensing factor MCM5
AALQELLSK	R	G	9	2	0.9869	1	0			sp|P62852|RS25_MOUSE	P62852	RS25_MOUSE	Rps25	40S ribosomal protein S25
AALQKLEHL	L	S	9	2	0.9927	5	0			sp|Q9JJ28|FLII_MOUSE	Q9JJ28	FLII_MOUSE	Flii	Protein flightless-1 homolog
AALQNAVAF	V	S	9	2	0.9982	13	0			sp|Q80VI1|TRI56_MOUSE	Q80VI1	TRI56_MOUSE	Trim56	E3 ubiquitin-protein ligase TRIM56
AALQNKDTY	Q	E	9	2	0.9995	2	0			sp|Q922M3|BACD3_MOUSE	Q922M3	BACD3_MOUSE	Kctd10	BTB/POZ domain-containing adapter for CUL3-mediated RhoA degradation protein 3
AALQNLEEL	Q	D	9	2	0.8472	1	0			sp|Q6NZL6|TONSL_MOUSE	Q6NZL6	TONSL_MOUSE	Tonsl	Tonsoku-like protein
AALQNLEQL	D	L	9	2	0.9982	33	0			sp|Q9WTK5|NFKB2_MOUSE	Q9WTK5	NFKB2_MOUSE	Nfkb2	Nuclear factor NF-kappa-B p100 subunit
AALQNLVKI	V	M	9	2	1	22	0			sp|P70168|IMB1_MOUSE	P70168	IMB1_MOUSE	Kpnb1	Importin subunit beta-1
AALQNYNNEL	G	V	10	2	0.9998	5	0			sp|Q9JJ94|SSNA1_MOUSE	Q9JJ94	SSNA1_MOUSE	Ssna1	Microtubule nucleation factor SSNA1
AALRDYETV	R	V	9	2	0.846	1	0			sp|Q60676|PPP5_MOUSE	Q60676	PPP5_MOUSE	Ppp5c	Serine/threonine-protein phosphatase 5
AALRFLSQL	I	E	9	2	0.9908	2	0			sp|Q9D2N9|VP33A_MOUSE	Q9D2N9	VP33A_MOUSE	Vps33a	Vacuolar protein sorting-associated protein 33A
AALRLLTYL	R	S	9	2	0.988	2	0			sp|Q8BQ33|TICRR_MOUSE	Q8BQ33	TICRR_MOUSE	Ticrr	Treslin
AALTHHPAAM	K	S	10	2	1	2	0	10M(15.9949)		sp|Q8K1L0|CREB5_MOUSE	Q8K1L0	CREB5_MOUSE	Creb5	Cyclic AMP-responsive element-binding protein 5
AALTLLEKM	H	K	9	2	0.9848	3	0	9M(15.9949)		sp|Q8R313|EXOC6_MOUSE	Q8R313	EXOC6_MOUSE	Exoc6	Exocyst complex component 6
AALVDLDSL	N	V	9	2	0.9911	3	0			sp|Q80VP1|EPN1_MOUSE	Q80VP1	EPN1_MOUSE	Epn1	Epsin-1
AALVNLDSL	N	V	9	2	0.9992	11	0			sp|Q8CHU3|EPN2_MOUSE	Q8CHU3	EPN2_MOUSE	Epn2	Epsin-2
AALVNPDSF	E	G	9	2	0.9986	4	0			sp|P70121|ZHX1_MOUSE	P70121	ZHX1_MOUSE	Zhx1	Zinc fingers and homeoboxes protein 1
AALVNVQIPL	G	L	10	2	0.9397	3	0			sp|Q9CXJ4|MITOS_MOUSE	Q9CXJ4	MITOS_MOUSE	Abcb8	Mitochondrial potassium channel ATP-binding subunit
AALVSKAIDVL	Q	V	11	2	0.9998	2	0			sp|E1U8D0|SOGA1_MOUSE	E1U8D0	SOGA1_MOUSE	Soga1	Protein SOGA1
AALVSQVQM	A	E	9	2	0.9931	2	0	9M(15.9949)		sp|Q70FJ1|AKAP9_MOUSE	Q70FJ1	AKAP9_MOUSE	Akap9	A-kinase anchor protein 9
AALVSRTFL	S	S	9	2	0.9976	9	0			sp|P48410|ABCD1_MOUSE	P48410	ABCD1_MOUSE	Abcd1	ATP-binding cassette sub-family D member 1
AALYNAGQL	F	K	9	2	0.979	1	0			sp|Q6ZPR6|IBTK_MOUSE	Q6ZPR6	IBTK_MOUSE	Ibtk	Inhibitor of Bruton tyrosine kinase
AAMADTFLEHM	H	C	11	2	1	13	0	11M(15.9949), 3M(15.9949)		sp|P52480|KPYM_MOUSE	P52480	KPYM_MOUSE	Pkm	Pyruvate kinase PKM
AAMAFTYL	E	K	8	2	0.9971	2	0	3M(15.9949)		sp|Q99ME2|WDR6_MOUSE	Q99ME2	WDR6_MOUSE	Wdr6	WD repeat-containing protein 6
AAMFYTNRV	D	L	9	2	0.996	2	0	3M(15.9949)		sp|P40124|CAP1_MOUSE	P40124	CAP1_MOUSE	Cap1	Adenylyl cyclase-associated protein 1
AAMGTQGNVM	S	G	10	2	1	1	0	10M(15.9949), 3M(15.9949)		sp|Q8CFE4|SCYL2_MOUSE	Q8CFE4	SCYL2_MOUSE	Scyl2	SCY1-like protein 2
AAMKLMTAL	L	V	9	2	0.9999	5	0	3M(15.9949), 6M(15.9949)		sp|O35638|STAG2_MOUSE	O35638	STAG2_MOUSE	Stag2	Cohesin subunit SA-2	Stag1	sp|Q9D3E6|STAG1_MOUSE
AAMKNVTEL	A	N	9	2	0.9999	48	0	3M(15.9949)		sp|P61982|1433G_MOUSE	P61982	1433G_MOUSE	Ywhag	14-3-3 protein gamma
AAMLLQQVM	D	R	9	2	0.9976	23	0	3M(15.9949), 9M(15.9949)		sp|Q8CCJ3|UFL1_MOUSE	Q8CCJ3	UFL1_MOUSE	Ufl1	E3 UFM1-protein ligase 1
AAMLNYTHI	A	L	9	2	0.999	7	0	3M(15.9949), 5N(0.9840)		sp|Q8VDB2|ALG12_MOUSE	Q8VDB2	ALG12_MOUSE	Alg12	Dol-P-Man:Man(7)GlcNAc(2)-PP-Dol alpha-1,6-mannosyltransferase
AAMQDPEVM	L	V	9	2	0.9985	1	0	3M(15.9949), 9M(15.9949)		sp|Q99L47|F10A1_MOUSE	Q99L47	F10A1_MOUSE	St13	Hsc70-interacting protein
AAMSNPRAM	I	Q	9	2	0.9972	1	0	3M(15.9949), 9M(15.9949)		sp|Q9QZM0|UBQL2_MOUSE	Q9QZM0	UBQL2_MOUSE	Ubqln2	Ubiquilin-2
AAMTLRTVL	A	L	9	2	0.9938	3	0	3M(15.9949)		sp|P61087|UBE2K_MOUSE	P61087	UBE2K_MOUSE	Ube2k	Ubiquitin-conjugating enzyme E2 K
AAMVSKFFL	R	S	9	2	0.9995	5	0	3M(15.9949)		sp|Q91WB2|PLPP7_MOUSE	Q91WB2	PLPP7_MOUSE	Plpp7	Inactive phospholipid phosphatase 7
AANENLKHI	N	S	9	2	0.9964	1	0			sp|Q2EMV9|PAR14_MOUSE	Q2EMV9	PAR14_MOUSE	Parp14	Protein mono-ADP-ribosyltransferase PARP14
AANINKESI	F	I	9	2	0.9963	3	0			sp|Q922B2|SYDC_MOUSE	Q922B2	SYDC_MOUSE	Dars1	Aspartate--tRNA ligase, cytoplasmic
AANRNNDAL	E	R	9	2	0.9997	18	0			sp|P20152|VIME_MOUSE	P20152	VIME_MOUSE	Vim	Vimentin
AANTLREHL	S	N	9	2	0.9825	1	0			sp|Q9JK30|ORC3_MOUSE	Q9JK30	ORC3_MOUSE	Orc3	Origin recognition complex subunit 3
AANVNAKDM	D	A	9	2	1	4	0	9M(15.9949)		sp|Q6PFX9|TNKS1_MOUSE	Q6PFX9	TNKS1_MOUSE	Tnks	Poly [ADP-ribose] polymerase tankyrase-1
AAPAGTTFV	A	Q	9	2	0.9996	4	0			sp|Q62176|RBM38_MOUSE	Q62176	RBM38_MOUSE	Rbm38	RNA-binding protein 38
AAPANPEMDNL	A	P	11	2	1	7	0	8M(15.9949)		sp|O08734|BAK_MOUSE	O08734	BAK_MOUSE	Bak1	Bcl-2 homologous antagonist/killer
AAPAPSLWTL	M	L	10	2	0.9859	1	0			sp|Q9D7I0|SHSA5_MOUSE	Q9D7I0	SHSA5_MOUSE	Shisa5	Protein shisa-5
AAPDPVLPPLP	T	A	11	2	0.9983	3	0			sp|Q4LDD4|ARAP1_MOUSE	Q4LDD4	ARAP1_MOUSE	Arap1	Arf-GAP with Rho-GAP domain, ANK repeat and PH domain-containing protein 1
AAPDVVVPTL	V	D	10	2	0.9989	3	0			sp|Q9JHU4|DYHC1_MOUSE	Q9JHU4	DYHC1_MOUSE	Dync1h1	Cytoplasmic dynein 1 heavy chain 1
AAPERLSQAL	E	A	10	2	0.9998	1	0			sp|Q61333|TNAP2_MOUSE	Q61333	TNAP2_MOUSE	Tnfaip2	Tumor necrosis factor alpha-induced protein 2
AAPESFEEL	F	K	9	2	0.9984	4	0			sp|Q8R3N1|NOP14_MOUSE	Q8R3N1	NOP14_MOUSE	Nop14	Nucleolar protein 14
AAPETREHL	T	F	9	2	0.9955	1	0			sp|Q9CZE3|RAB32_MOUSE	Q9CZE3	RAB32_MOUSE	Rab32	Ras-related protein Rab-32
AAPFDTVHI	V	P	9	2	0.9996	30	0			sp|Q8BNV1|TRM2A_MOUSE	Q8BNV1	TRM2A_MOUSE	Trmt2a	tRNA (uracil-5-)-methyltransferase homolog A
AAPGLIGNMM	P	G	10	2	1	4	0	10M(15.9949), 9M(15.9949)		sp|Q91VZ6|SMAP1_MOUSE	Q91VZ6	SMAP1_MOUSE	Smap1	Stromal membrane-associated protein 1
AAPGNKTSYI	C	A	10	2	0.9993	3	0			sp|Q8K4F6|NSUN5_MOUSE	Q8K4F6	NSUN5_MOUSE	Nsun5	28S rRNA (cytosine-C(5))-methyltransferase
AAPGPPSAAL	T	A	10	2	0.9777	3	0			sp|Q3UE17|MEX3D_MOUSE	Q3UE17	MEX3D_MOUSE	Mex3d	RNA-binding protein MEX3D
AAPGSKDHL	S	N	9	2	1	8	0			sp|Q8K1A5|TM41B_MOUSE	Q8K1A5	TM41B_MOUSE	Tmem41b	Transmembrane protein 41B
AAPGVDLTQL	N	L	10	2	0.9178	3	0			sp|P02535|K1C10_MOUSE	P02535	K1C10_MOUSE	Krt10	Keratin, type I cytoskeletal 10
AAPGVDLTQLL	N	N	11	2	0.8904	4	0			sp|P02535|K1C10_MOUSE	P02535	K1C10_MOUSE	Krt10	Keratin, type I cytoskeletal 10
AAPHSIESF	A	C	9	2	0.9923	3	0			sp|Q9EP82|WDR4_MOUSE	Q9EP82	WDR4_MOUSE	Wdr4	tRNA (guanine-N(7)-)-methyltransferase non-catalytic subunit WDR4
AAPIDRVGQTI	M	E	11	2	0.9946	1	0			sp|Q9D0E1|HNRPM_MOUSE	Q9D0E1	HNRPM_MOUSE	Hnrnpm	Heterogeneous nuclear ribonucleoprotein M
AAPIMLDLV	L	L	9	2	0.9966	3	0	5M(15.9949)		sp|Q9JHU9|INO1_MOUSE	Q9JHU9	INO1_MOUSE	Isyna1	Inositol-3-phosphate synthase 1
AAPINPSDI	L	N	9	2	0.9997	2	0			sp|Q9DCS3|MECR_MOUSE	Q9DCS3	MECR_MOUSE	Mecr	Enoyl-[acyl-carrier-protein] reductase, mitochondrial
AAPINPSDINM	L	I	11	2	0.9999	2	0	11M(15.9949)		sp|Q9DCS3|MECR_MOUSE	Q9DCS3	MECR_MOUSE	Mecr	Enoyl-[acyl-carrier-protein] reductase, mitochondrial
AAPINPSDINMI	L	Q	12	2	1	8	0	11M(15.9949)		sp|Q9DCS3|MECR_MOUSE	Q9DCS3	MECR_MOUSE	Mecr	Enoyl-[acyl-carrier-protein] reductase, mitochondrial
AAPINTQGL	S	Q	9	2	0.9997	12	0			sp|Q8BIH0|SP130_MOUSE	Q8BIH0	SP130_MOUSE	Sap130	Histone deacetylase complex subunit SAP130
AAPISPWTM	A	A	9	2	0.9997	15	0	9M(15.9949)		sp|Q3U133|ZN746_MOUSE	Q3U133	ZN746_MOUSE	Znf746	Zinc finger protein 746
AAPISTTEL	T	K	9	2	0.9916	3	0			sp|P35991|BTK_MOUSE	P35991	BTK_MOUSE	Btk	Tyrosine-protein kinase BTK
AAPKAGPGM	T	V	9	2	0.9996	2	0	9M(15.9949)		sp|Q61166|MARE1_MOUSE	Q61166	MARE1_MOUSE	Mapre1	Microtubule-associated protein RP/EB family member 1
AAPKSAETL	L	G	9	2	0.9975	5	0			sp|Q80V53|CHSTE_MOUSE	Q80V53	CHSTE_MOUSE	Chst14	Carbohydrate sulfotransferase 14
AAPLSEMYQ	A	N	9	2	0.9566	1	0			sp|Q4FZD7|PLK5_MOUSE	Q4FZD7	PLK5_MOUSE	Plk5	Inactive serine/threonine-protein kinase PLK5
AAPLSGQTF	Q	T	9	2	0.9981	1	0			sp|O89090|SP1_MOUSE	O89090	SP1_MOUSE	Sp1	Transcription factor Sp1
AAPMNDSEF	G	A	9	2	0.994	2	0	4M(15.9949)		sp|P34960|MMP12_MOUSE	P34960	MMP12_MOUSE	Mmp12	Macrophage metalloelastase
AAPPPGIVEI	H	D	10	2	0.9999	28	0			sp|E9Q7E2|ARID2_MOUSE	E9Q7E2	ARID2_MOUSE	Arid2	AT-rich interactive domain-containing protein 2
AAPPPTSTAV	A	S	10	2	0.976	2	0			sp|Q9DBY1|SYVN1_MOUSE	Q9DBY1	SYVN1_MOUSE	Syvn1	E3 ubiquitin-protein ligase synoviolin
AAPPSFGTL	C	R	9	2	0.989	1	0			sp|Q8CG79|ASPP2_MOUSE	Q8CG79	ASPP2_MOUSE	Tp53bp2	Apoptosis-stimulating of p53 protein 2
AAPQNFTP	I	S	8	2	0.9873	3	0			sp|Q9Z1T1|AP3B1_MOUSE	Q9Z1T1	AP3B1_MOUSE	Ap3b1	AP-3 complex subunit beta-1
AAPQNFTPS	I	M	9	2	0.891	2	0			sp|Q9Z1T1|AP3B1_MOUSE	Q9Z1T1	AP3B1_MOUSE	Ap3b1	AP-3 complex subunit beta-1
AAPQNFTPSM	I	I	10	2	0.9995	3	0	10M(15.9949)		sp|Q9Z1T1|AP3B1_MOUSE	Q9Z1T1	AP3B1_MOUSE	Ap3b1	AP-3 complex subunit beta-1
AAPQNFTPSMI	I	L	11	2	1	55	0	10M(15.9949)		sp|Q9Z1T1|AP3B1_MOUSE	Q9Z1T1	AP3B1_MOUSE	Ap3b1	AP-3 complex subunit beta-1
AAPRGPGLFL	M	I	10	2	0.9982	3	0			sp|Q8BJ48|NAGPA_MOUSE	Q8BJ48	NAGPA_MOUSE	Nagpa	N-acetylglucosamine-1-phosphodiester alpha-N-acetylglucosaminidase
AAPRNSPTGL	P	A	10	2	0.9955	2	0			sp|Q8CGI1|F193A_MOUSE	Q8CGI1	F193A_MOUSE	Fam193a	Protein FAM193A
AAPRPPPKPM	G	-	10	2	0.98	12	0	10M(15.9949)		sp|P62855|RS26_MOUSE	P62855	RS26_MOUSE	Rps26	40S ribosomal protein S26
AAPRSFIFL	I	W	9	2	0.9907	18	0			sp|Q3UIK4|MET14_MOUSE	Q3UIK4	MET14_MOUSE	Mettl14	N6-adenosine-methyltransferase non-catalytic subunit
AAPRTNGVAM	V	G	10	2	0.996	5	0	10M(15.9949)		sp|Q8BGZ2|F168A_MOUSE	Q8BGZ2	F168A_MOUSE	Fam168a	Protein FAM168A
AAPSAPSAGSL	S	Y	11	2	0.9971	2	0			sp|Q8CI61|BAG4_MOUSE	Q8CI61	BAG4_MOUSE	Bag4	BAG family molecular chaperone regulator 4
AAPSAPSAGSLYM	S	T	13	2	0.9869	1	0	13M(15.9949)		sp|Q8CI61|BAG4_MOUSE	Q8CI61	BAG4_MOUSE	Bag4	BAG family molecular chaperone regulator 4
AAPSDTHEI	S	H	9	2	0.9924	2	0			sp|Q8CJF7|ELYS_MOUSE	Q8CJF7	ELYS_MOUSE	Ahctf1	Protein ELYS
AAPSGHLGGL	S	N	10	2	0.9997	4	0			sp|P97789|XRN1_MOUSE	P97789	XRN1_MOUSE	Xrn1	5'-3' exoribonuclease 1
AAPSNLPYL	H	H	9	2	1	46	0			sp|Q8BFV3|DUS4_MOUSE	Q8BFV3	DUS4_MOUSE	Dusp4	Dual specificity protein phosphatase 4
AAPSPGANSL	A	H	10	2	1	2	0			sp|Q4KL18|TM171_MOUSE	Q4KL18	TM171_MOUSE	Tmem171	Transmembrane protein 171
AAPSSPTTM	S	P	9	2	0.9848	3	0	9M(15.9949)		sp|Q9D0L1|ZBED3_MOUSE	Q9D0L1	ZBED3_MOUSE	Zbed3	Zinc finger BED domain-containing protein 3
AAPSSSGFMSF	P	R	11	2	1	2	0	9M(15.9949)		sp|Q9R0I7|YLPM1_MOUSE	Q9R0I7	YLPM1_MOUSE	Ylpm1	YLP motif-containing protein 1
AAPTALASRDGNL	F	A	13	2	0.9992	1	0			sp|Q91VX2|UBAP2_MOUSE	Q91VX2	UBAP2_MOUSE	Ubap2	Ubiquitin-associated protein 2
AAPTNANSL	S	N	9	2	0.9992	7	0			sp|Q8BT14|CNOT4_MOUSE	Q8BT14	CNOT4_MOUSE	Cnot4	CCR4-NOT transcription complex subunit 4
AAPTNANSLNSTF	S	S	13	2	0.9996	3	0			sp|Q8BT14|CNOT4_MOUSE	Q8BT14	CNOT4_MOUSE	Cnot4	CCR4-NOT transcription complex subunit 4
AAPTNRQIEIL	T	E	11	2	0.9998	5	0			sp|Q9Z0W3|NU160_MOUSE	Q9Z0W3	NU160_MOUSE	Nup160	Nuclear pore complex protein Nup160
AAPTNRQIEILEL	T	E	13	2	0.9861	3	0			sp|Q9Z0W3|NU160_MOUSE	Q9Z0W3	NU160_MOUSE	Nup160	Nuclear pore complex protein Nup160
AAPTPPPDSEV	E	K	11	2	0.9834	2	0			sp|Q8K363|DDX18_MOUSE	Q8K363	DDX18_MOUSE	Ddx18	ATP-dependent RNA helicase DDX18
AAPTSAARV	A	P	9	2	0.9995	1	0			sp|Q9Z2B5|E2AK3_MOUSE	Q9Z2B5	E2AK3_MOUSE	Eif2ak3	Eukaryotic translation initiation factor 2-alpha kinase 3
AAPVSATVL	G	T	9	2	0.9958	3	0			sp|P41216|ACSL1_MOUSE	P41216	ACSL1_MOUSE	Acsl1	Long-chain-fatty-acid--CoA ligase 1
AAPVSGPRL	K	D	9	2	0.9956	2	0			sp|Q6NSQ7|LTV1_MOUSE	Q6NSQ7	LTV1_MOUSE	Ltv1	Protein LTV1 homolog
AAPYRTQSSASL	L	A	12	2	0.9929	1	0			sp|Q8C2Q3|RBM14_MOUSE	Q8C2Q3	RBM14_MOUSE	Rbm14	RNA-binding protein 14
AAQTNLGFI	A	H	9	2	0.9399	1	0			sp|P52875|TM165_MOUSE	P52875	TM165_MOUSE	Tmem165	Transmembrane protein 165
AASKNGQYV	I	A	9	2	0.9963	7	0			sp|Q5SSI6|UTP18_MOUSE	Q5SSI6	UTP18_MOUSE	Utp18	U3 small nucleolar RNA-associated protein 18 homolog
AASLHNTPM	V	G	9	2	0.9975	1	0	9M(15.9949)		sp|Q9QYL7|ABT1_MOUSE	Q9QYL7	ABT1_MOUSE	Abt1	Activator of basal transcription 1
AASVNPIDVNM	H	R	11	2	0.93	1	0	11M(15.9949)		sp|Q924D0|RT4I1_MOUSE	Q924D0	RT4I1_MOUSE	Rtn4ip1	Reticulon-4-interacting protein 1, mitochondrial
AASYYAPVR	D	-	9	2	0.9993	33	0			iRT-pepG	iRT-pepG	iRT-pepG		iRT-pepG
AATFNPELI	A	T	9	2	0.9988	5	0			sp|Q9R0H0|ACOX1_MOUSE	Q9R0H0	ACOX1_MOUSE	Acox1	Peroxisomal acyl-coenzyme A oxidase 1
AATRNSLYDM	S	A	10	2	0.9413	1	0	10M(15.9949)		sp|Q8VE92|RBM4B_MOUSE	Q8VE92	RBM4B_MOUSE	Rbm4b	RNA-binding protein 4B
AATSFVLM	M	T	8	2	0.9917	1	0	8M(15.9949)		sp|Q9CZ44|NSF1C_MOUSE	Q9CZ44	NSF1C_MOUSE	Nsfl1c	NSFL1 cofactor p47
AATTGPQGLHL	A	L	11	2	0.9973	2	0			sp|Q8R089|FBRS_MOUSE	Q8R089	FBRS_MOUSE	Fbrs	Probable fibrosin-1
AAVAGEDGR	R	M	9	2	0.981	1	0			sp|Q9Z204|HNRPC_MOUSE	Q9Z204	HNRPC_MOUSE	Hnrnpc	Heterogeneous nuclear ribonucleoproteins C1/C2
AAVANQHSSFV	S	A	11	2	0.9997	2	0			sp|Q6P9P6|KIF11_MOUSE	Q6P9P6	KIF11_MOUSE	Kif11	Kinesin-like protein KIF11
AAVANWIFSSEL	C	S	12	2	0.9708	1	0			sp|Q3UYV9|NCBP1_MOUSE	Q3UYV9	NCBP1_MOUSE	Ncbp1	Nuclear cap-binding protein subunit 1
AAVAPSPQTI	S	P	10	2	0.932	1	0			sp|Q9DB00|GON4L_MOUSE	Q9DB00	GON4L_MOUSE	Gon4l	GON-4-like protein
AAVEFISKM	E	S	9	2	0.9987	2	0	9M(15.9949)		sp|Q8BYR2|LATS1_MOUSE	Q8BYR2	LATS1_MOUSE	Lats1	Serine/threonine-protein kinase LATS1
AAVENLKNI	A	F	9	2	0.9867	3	0			sp|Q6KAR6|EXOC3_MOUSE	Q6KAR6	EXOC3_MOUSE	Exoc3	Exocyst complex component 3
AAVENLPTF	R	L	9	2	0.9803	2	0			sp|P70168|IMB1_MOUSE	P70168	IMB1_MOUSE	Kpnb1	Importin subunit beta-1
AAVENLPTFL	R	V	10	2	0.9999	18	0			sp|P70168|IMB1_MOUSE	P70168	IMB1_MOUSE	Kpnb1	Importin subunit beta-1
AAVENVSEL	E	S	9	2	0.9982	5	0			sp|E9Q6J5|BD1L1_MOUSE	E9Q6J5	BD1L1_MOUSE	Bod1l	Biorientation of chromosomes in cell division protein 1-like 1
AAVESEEFL	Y	A	9	2	0.9001	1	0			sp|E9Q634|MYO1E_MOUSE	E9Q634	MYO1E_MOUSE	Myo1e	Unconventional myosin-Ie
AAVGNHVAKL	A	L	10	2	0.994	3	0			sp|Q8VBW6|ULA1_MOUSE	Q8VBW6	ULA1_MOUSE	Nae1	NEDD8-activating enzyme E1 regulatory subunit
AAVIAHDFL	L	A	9	2	0.9999	19	0			sp|P30282|CCND3_MOUSE	P30282	CCND3_MOUSE	Ccnd3	G1/S-specific cyclin-D3
AAVIDEDVL	E	R	9	2	0.9834	5	0			sp|Q9D787|PPIL2_MOUSE	Q9D787	PPIL2_MOUSE	Ppil2	RING-type E3 ubiquitin-protein ligase PPIL2
AAVIDQERL	C	A	9	2	0.9989	5	0			sp|Q80UW5|MRCKG_MOUSE	Q80UW5	MRCKG_MOUSE	Cdc42bpg	Serine/threonine-protein kinase MRCK gamma
AAVIFLHGL	T	G	9	2	0.9898	2	0			sp|P97823|LYPA1_MOUSE	P97823	LYPA1_MOUSE	Lypla1	Acyl-protein thioesterase 1	Lypla2	sp|Q9WTL7|LYPA2_MOUSE
AAVINKTVV	L	P	9	2	0.9738	1	0			sp|Q8BKT3|GCFC2_MOUSE	Q8BKT3	GCFC2_MOUSE	Gcfc2	Intron Large complex component GCFC2
AAVIVKDQL	V	-	9	2	0.9835	3	0			sp|P47740|AL3A2_MOUSE	P47740	AL3A2_MOUSE	Aldh3a2	Aldehyde dehydrogenase family 3 member A2
AAVKFHNL	D	N	8	2	0.9977	3	0			sp|Q64521|GPDM_MOUSE	Q64521	GPDM_MOUSE	Gpd2	Glycerol-3-phosphate dehydrogenase, mitochondrial
AAVKGAPETL	I	H	10	2	0.9992	2	0			sp|Q9EPE9|AT131_MOUSE	Q9EPE9	AT131_MOUSE	Atp13a1	Endoplasmic reticulum transmembrane helix translocase
AAVKNEVNV	A	P	9	2	0.9923	2	0			sp|E9Q8I9|FRY_MOUSE	E9Q8I9	FRY_MOUSE	Fry	Protein furry homolog
AAVLDIDTV	H	L	9	2	0.9843	2	0			sp|Q499E6|CA109_MOUSE	Q499E6	CA109_MOUSE		Ribosome biogenesis protein C1orf109 homolog
AAVLDVDGL	D	D	9	2	0.9573	1	0			sp|P97412|LYST_MOUSE	P97412	LYST_MOUSE	Lyst	Lysosomal-trafficking regulator
AAVLNPRFL	T	Q	9	2	0.9795	4	0			sp|Q7TPS5|C2CD5_MOUSE	Q7TPS5	C2CD5_MOUSE	C2cd5	C2 domain-containing protein 5
AAVMYPRM	D	D	8	2	0.9982	3	0	4M(15.9949), 8M(15.9949)		sp|Q9CXL1|TM50A_MOUSE	Q9CXL1	TM50A_MOUSE	Tmem50a	Transmembrane protein 50A
AAVNNVEATL	A	L	10	2	0.9835	1	0			sp|O35516|NOTC2_MOUSE	O35516	NOTC2_MOUSE	Notch2	Neurogenic locus notch homolog protein 2	Notch3	sp|Q61982|NOTC3_MOUSE
AAVNSPSEFM	V	Q	10	2	0.9575	1	0	10M(15.9949)		sp|Q9WV38|GTR5_MOUSE	Q9WV38	GTR5_MOUSE	Slc2a5	Solute carrier family 2, facilitated glucose transporter member 5
AAVPGKTFV	W	S	9	2	0.8357	1	0			sp|P62962|PROF1_MOUSE	P62962	PROF1_MOUSE	Pfn1	Profilin-1
AAVQMHDVL	S	V	9	2	0.9822	1	0	5M(15.9949)		sp|Q80YV3|TRRAP_MOUSE	Q80YV3	TRRAP_MOUSE	Trrap	Transformation/transcription domain-associated protein
AAVQNPALTAL	M	T	11	2	0.9999	7	0			sp|Q3U1N2|SRBP2_MOUSE	Q3U1N2	SRBP2_MOUSE	Srebf2	Sterol regulatory element-binding protein 2
AAVRDISEA	A	S	9	2	0.9995	4	0			sp|P62855|RS26_MOUSE	P62855	RS26_MOUSE	Rps26	40S ribosomal protein S26
AAVRGNAAVL	E	D	10	2	0.9821	1	0			sp|Q9CQW0|EMC6_MOUSE	Q9CQW0	EMC6_MOUSE	Emc6	ER membrane protein complex subunit 6
AAVRLTELL	L	S	9	2	0.9929	5	0			sp|Q9QUK4|BIR1B_MOUSE	Q9QUK4	BIR1B_MOUSE	Naip2	Baculoviral IAP repeat-containing protein 1b	Naip5, Naip6, Naip7	sp|Q9JIB3|BIR1G_MOUSE, sp|Q9JIB6|BIR1F_MOUSE, sp|Q9R016|BIR1E_MOUSE
AAVRNEAVVI	L	S	10	2	0.9722	1	0			sp|P18155|MTDC_MOUSE	P18155	MTDC_MOUSE	Mthfd2	Bifunctional methylenetetrahydrofolate dehydrogenase/cyclohydrolase, mitochondrial
AAVSFAKDFL	D	A	10	2	0.9969	2	0			sp|P51881|ADT2_MOUSE	P51881	ADT2_MOUSE	Slc25a5	ADP/ATP translocase 2
AAVSFISKF	A	L	9	2	0.9963	1	0			sp|P62325|BTG1_MOUSE	P62325	BTG1_MOUSE	Btg1	Protein BTG1
AAVSNFGYDL	A	Y	10	2	0.9998	2	0			sp|P97298|PEDF_MOUSE	P97298	PEDF_MOUSE	Serpinf1	Pigment epithelium-derived factor
AAVSNLVRV	Q	G	9	2	0.9974	1	0			sp|Q64727|VINC_MOUSE	Q64727	VINC_MOUSE	Vcl	Vinculin
AAVTGHIRI	D	R	9	2	0.9832	5	0			sp|Q9JIF7|COPB_MOUSE	Q9JIF7	COPB_MOUSE	Copb1	Coatomer subunit beta
AAVVGLVAI	V	L	9	2	0.9733	1	0			sp|Q91X78|ERLN1_MOUSE	Q91X78	ERLN1_MOUSE	Erlin1	Erlin-1
AAVVMLDRI	Q	F	9	2	0.9998	6	0	5M(15.9949)		sp|E9Q555|RN213_MOUSE	E9Q555	RN213_MOUSE	Rnf213	E3 ubiquitin-protein ligase RNF213
AAVVNFEEA	P	L	9	2	0.9993	2	0			sp|Q9ERK4|XPO2_MOUSE	Q9ERK4	XPO2_MOUSE	Cse1l	Exportin-2
AAVVNFEEAL	P	F	10	2	0.9964	2	0			sp|Q9ERK4|XPO2_MOUSE	Q9ERK4	XPO2_MOUSE	Cse1l	Exportin-2
AAVVSVAYL	V	T	9	2	0.972	2	0			sp|P49282|NRAM2_MOUSE	P49282	NRAM2_MOUSE	Slc11a2	Natural resistance-associated macrophage protein 2
AAVVYHKL	D	H	8	2	0.9702	1	0			sp|Q9WTN3|SRBP1_MOUSE	Q9WTN3	SRBP1_MOUSE	Srebf1	Sterol regulatory element-binding protein 1
AAVWNAQEA	H	Q	9	2	0.9979	2	0			sp|O08915|AIP_MOUSE	O08915	AIP_MOUSE	Aip	AH receptor-interacting protein
AAYASQPAAYA	A	A	11	2	0.9999	4	0			sp|Q8C2Q3|RBM14_MOUSE	Q8C2Q3	RBM14_MOUSE	Rbm14	RNA-binding protein 14
AAYAYSAL	I	S	8	2	0.9918	1	0			sp|Q9CQ22|LTOR1_MOUSE	Q9CQ22	LTOR1_MOUSE	Lamtor1	Ragulator complex protein LAMTOR1
AAYEFTTL	V	T	8	2	0.9995	45	0			sp|P32233|DRG1_MOUSE	P32233	DRG1_MOUSE	Drg1	Developmentally-regulated GTP-binding protein 1
AAYGAQPSATL	A	A	11	2	0.9932	2	0			sp|Q8C2Q3|RBM14_MOUSE	Q8C2Q3	RBM14_MOUSE	Rbm14	RNA-binding protein 14
AAYGFRNI	A	Q	8	2	0.9984	7	0			sp|Q9CYQ7|NARF_MOUSE	Q9CYQ7	NARF_MOUSE	Narf	Nuclear prelamin A recognition factor
AAYGNRQNL	A	E	9	2	0.9993	2	0			sp|Q8BTI7|ANR52_MOUSE	Q8BTI7	ANR52_MOUSE	Ankrd52	Serine/threonine-protein phosphatase 6 regulatory ankyrin repeat subunit C
AAYIFGLGL	F	T	9	2	0.9933	13	0			sp|Q9D8V0|HM13_MOUSE	Q9D8V0	HM13_MOUSE	Hm13	Minor histocompatibility antigen H13
AAYKFGVA	A	E	8	2	0.9968	2	0			sp|Q9CPQ1|COX6C_MOUSE	Q9CPQ1	COX6C_MOUSE	Cox6c	Cytochrome c oxidase subunit 6C
AAYLRNISM	A	R	9	2	0.8686	1	0	9M(15.9949)		sp|Q8BX70|VP13C_MOUSE	Q8BX70	VP13C_MOUSE	Vps13c	Intermembrane lipid transfer protein VPS13C
AAYPFVNM	L	A	8	2	0.992	2	0	8M(15.9949)		sp|Q8VC48|PEX12_MOUSE	Q8VC48	PEX12_MOUSE	Pex12	Peroxisome assembly protein 12
AAYRAQPSASL	G	G	11	2	0.9998	3	0			sp|Q8C2Q3|RBM14_MOUSE	Q8C2Q3	RBM14_MOUSE	Rbm14	RNA-binding protein 14
AAYRLPYLL	V	V	9	2	0.9992	1	0			sp|Q9JHP7|PLGT2_MOUSE	Q9JHP7	PLGT2_MOUSE	Poglut2	Protein O-glucosyltransferase 2
AAYRNLGQNL	Q	W	10	2	0.9995	10	0			sp|Q8BK67|RCC2_MOUSE	Q8BK67	RCC2_MOUSE	Rcc2	Protein RCC2
AAYSFYNI	K	H	8	2	0.9983	1	0			sp|O70311|NMT2_MOUSE	O70311	NMT2_MOUSE	Nmt2	Glycylpeptide N-tetradecanoyltransferase 2
AAYSFYNV	K	H	8	2	0.9998	15	0			sp|O70310|NMT1_MOUSE	O70310	NMT1_MOUSE	Nmt1	Glycylpeptide N-tetradecanoyltransferase 1
AAYTFYAL	A	A	8	2	0.9876	2	0			sp|Q8R0P8|ABHD8_MOUSE	Q8R0P8	ABHD8_MOUSE	Abhd8	Protein ABHD8
AAYYFKTL	P	I	8	2	0.9909	1	0			sp|P12265|BGLR_MOUSE	P12265	BGLR_MOUSE	Gusb	Beta-glucuronidase
ACEFCMCDQ	S	G	9	2	0.9743	1	0	6M(15.9949)		sp|Q80T14|FRAS1_MOUSE	Q80T14	FRAS1_MOUSE	Fras1	Extracellular matrix organizing protein FRAS1
ADDGRPFPQVIK	K	S	12	3	0.9013	1	0			sp|P05064|ALDOA_MOUSE	P05064	ALDOA_MOUSE	Aldoa	Fructose-bisphosphate aldolase A
ADEGISFR	K	G	8	2	0.9896	1	0			sp|P35700|PRDX1_MOUSE	P35700	PRDX1_MOUSE	Prdx1	Peroxiredoxin-1
ADLINNLGTIAK	K	S	12	2	0.9671	1	0			sp|P11499|HS90B_MOUSE	P11499	HS90B_MOUSE	Hsp90ab1	Heat shock protein HSP 90-beta	Hsp90aa1	sp|P07901|HS90A_MOUSE
ADLSHIET	A	R	8	2	0.983	2	0			sp|P08249|MDHM_MOUSE	P08249	MDHM_MOUSE	Mdh2	Malate dehydrogenase, mitochondrial
ADNLEQISVRGPI	K	R	13	3	0.8091	1	0			sp|Q80T14|FRAS1_MOUSE	Q80T14	FRAS1_MOUSE	Fras1	Extracellular matrix organizing protein FRAS1
ADPCGGDESDVL	L	P	12	2	0.918	1	0			sp|Q0VDN7|RUND1_MOUSE	Q0VDN7	RUND1_MOUSE	Rundc1	RUN domain-containing protein 1
ADTFLEHM	M	C	8	2	0.9903	3	0	8M(15.9949)		sp|P52480|KPYM_MOUSE	P52480	KPYM_MOUSE	Pkm	Pyruvate kinase PKM
ADVTPADF	-	S	8	2	0.8275	1	0			iRT-pepH	iRT-pepH	iRT-pepH		iRT-pepH
ADVTPADFSE	-	W	10	2	0.8677	1	0			iRT-pepH	iRT-pepH	iRT-pepH		iRT-pepH
ADVTPADFSEWSK	-	-	13	2, 3	1	149	0			iRT-pepH	iRT-pepH	iRT-pepH		iRT-pepH
ADYAFTTL	I	R	8	2	0.9816	1	0			sp|Q8K013|GTPBA_MOUSE	Q8K013	GTPBA_MOUSE	Gtpbp10	GTP-binding protein 10
ADYQYQLL	N	R	8	2	0.9952	3	0			sp|Q60809|CNOT7_MOUSE	Q60809	CNOT7_MOUSE	Cnot7	CCR4-NOT transcription complex subunit 7
AEAAFSDDEEDLNSK	N	G	15	3	0.7973	1	0			sp|Q7TPD0|INT3_MOUSE	Q7TPD0	INT3_MOUSE	Ints3	Integrator complex subunit 3
AEEESFPGFVNL	L	N	12	2	0.9997	11	0			sp|Q6ZWR6|SYNE1_MOUSE	Q6ZWR6	SYNE1_MOUSE	Syne1	Nesprin-1
AELVLVNP	F	S	8	2	0.8962	2	0			sp|P52019|ERG1_MOUSE	P52019	ERG1_MOUSE	Sqle	Squalene monooxygenase
AELVNLDFL	E	G	9	2	0.9995	7	0			sp|Q9JJ11|TACC3_MOUSE	Q9JJ11	TACC3_MOUSE	Tacc3	Transforming acidic coiled-coil-containing protein 3
AENEFVTIK	N	K	9	2	0.9812	3	0			sp|P04104|K2C1_MOUSE	P04104	K2C1_MOUSE	Krt1	Keratin, type II cytoskeletal 1
AEQIYPQL	M	P	8	2	0.7445	1	0			sp|P52019|ERG1_MOUSE	P52019	ERG1_MOUSE	Sqle	Squalene monooxygenase
AEVVRFLG	A	K	8	2	0.9926	9	0			sp|E9QAF0|SPT31_MOUSE	E9QAF0	SPT31_MOUSE	Spata31	Spermatogenesis-associated protein 31
AEWKATQL	L	K	8	2	0.9257	1	0			sp|Q8BVF2|PDCL3_MOUSE	Q8BVF2	PDCL3_MOUSE	Pdcl3	Phosducin-like protein 3
AEYIYPSL	D	E	8	2	0.9992	15	0			sp|Q80TJ7|PHF8_MOUSE	Q80TJ7	PHF8_MOUSE	Phf8	Histone lysine demethylase PHF8
AFAFKKL	V	R	7	2	0.9831	3	0			sp|Q8CFA1|IRAK2_MOUSE	Q8CFA1	IRAK2_MOUSE	Irak2	Interleukin-1 receptor-associated kinase-like 2
AFASLRM	K	A	7	2	0.9907	9	0	7M(15.9949)		sp|P47963|RL13_MOUSE	P47963	RL13_MOUSE	Rpl13	60S ribosomal protein L13
AFDYPSRL	K	S	8	2	0.9173	1	0			sp|Q6P5C7|ZN728_MOUSE	Q6P5C7	ZN728_MOUSE	Znf728	Zinc finger protein 728
AFEFINSL	A	L	8	2	0.9527	4	0			sp|P26673|A47_VACCW	P26673	A47_VACCW	VACWR173	Protein A47
AFEKIPEFI	G	A	9	2	0.9999	9	0			sp|Q8BWZ3|NAA25_MOUSE	Q8BWZ3	NAA25_MOUSE	Naa25	N-alpha-acetyltransferase 25, NatB auxiliary subunit
AFEKLLKL	D	G	8	2	0.9282	1	0			sp|Q3UFM5|NOM1_MOUSE	Q3UFM5	NOM1_MOUSE	Nom1	Nucleolar MIF4G domain-containing protein 1
AFENTKTGI	P	P	9	2	0.9472	2	0			sp|Q925U4|EDEM1_MOUSE	Q925U4	EDEM1_MOUSE	Edem1	ER degradation-enhancing alpha-mannosidase-like protein 1
AFETVHSM	V	D	8	2	0.8223	3	0	8M(15.9949)		sp|P08680|HEM0_MOUSE	P08680	HEM0_MOUSE	Alas2	5-aminolevulinate synthase, erythroid-specific, mitochondrial	Alas1	sp|Q8VC19|HEM1_MOUSE
AFFGPEGF	G	H	8	2	0.9875	1	0			sp|Q8VI36|PAXI_MOUSE	Q8VI36	PAXI_MOUSE	Pxn	Paxillin
AFFKTLSNM	D	G	9	2	0.9999	4	0	9M(15.9949)		sp|Q6P2K6|P4R3A_MOUSE	Q6P2K6	P4R3A_MOUSE	Ppp4r3a	Serine/threonine-protein phosphatase 4 regulatory subunit 3A
AFFRFSGL	L	L	8	2	0.9987	4	0			sp|Q61542|STAR3_MOUSE	Q61542	STAR3_MOUSE	Stard3	StAR-related lipid transfer protein 3
AFFYFESV	E	K	8	2	0.9776	1	0			sp|Q6NVF0|OCRL_MOUSE	Q6NVF0	OCRL_MOUSE	Ocrl	Inositol polyphosphate 5-phosphatase OCRL
AFFYSNYL	V	L	8	2	0.7388	1	0			sp|Q8BJ51|MFS11_MOUSE	Q8BJ51	MFS11_MOUSE	Mfsd11	UNC93-like protein MFSD11
AFHKGSYL	F	R	8	2	0.9887	1	0			sp|P97445|CAC1A_MOUSE	P97445	CAC1A_MOUSE	Cacna1a	Voltage-dependent P/Q-type calcium channel subunit alpha-1A
AFKFKAL	T	K	7	2	0.7976	1	0			sp|Q04690|NF1_MOUSE	Q04690	NF1_MOUSE	Nf1	Neurofibromin
AFLSVDHL	N	G	8	2	0.9922	1	0			sp|Q3UHK8|TNR6A_MOUSE	Q3UHK8	TNR6A_MOUSE	Tnrc6a	Trinucleotide repeat-containing gene 6A protein
AFLVLPNRL	A	L	9	2	0.9947	3	0			sp|Q3U7R1|ESYT1_MOUSE	Q3U7R1	ESYT1_MOUSE	Esyt1	Extended synaptotagmin-1
AFMKNFLEM	A	H	9	2	0.9997	9	0	3M(15.9949), 9M(15.9949)		sp|Q99K85|SERC_MOUSE	Q99K85	SERC_MOUSE	Psat1	Phosphoserine aminotransferase
AFNQLPHL	A	A	8	2	0.9982	9	0			sp|Q7TN98|CPEB4_MOUSE	Q7TN98	CPEB4_MOUSE	Cpeb4	Cytoplasmic polyadenylation element-binding protein 4
AFPTVTLPHL	T	F	10	2	0.9115	2	0			sp|O35954|PITM1_MOUSE	O35954	PITM1_MOUSE	Pitpnm1	Membrane-associated phosphatidylinositol transfer protein 1
AFPWTISL	D	H	8	2	0.7455	1	0			sp|Q80TY5|VP13B_MOUSE	Q80TY5	VP13B_MOUSE	Vps13b	Intermembrane lipid transfer protein VPS13B
AFQYGIKM	A	S	8	2	0.9975	2	0	8M(15.9949)		sp|Q9Z1M8|RED_MOUSE	Q9Z1M8	RED_MOUSE	Ik	Protein Red
AFRLINANM	D	M	9	2	0.9444	1	0	9M(15.9949)		sp|O35593|PSDE_MOUSE	O35593	PSDE_MOUSE	Psmd14	26S proteasome non-ATPase regulatory subunit 14
AFSQVFSHPSM	S	G	11	2	0.9337	4	0	11M(15.9949)		sp|Q640Q5|PAN3_MOUSE	Q640Q5	PAN3_MOUSE	Pan3	PAN2-PAN3 deadenylation complex subunit Pan3
AFVKFNYM	P	A	8	2	0.9884	1	0	8M(15.9949)		sp|Q99M51|NCK1_MOUSE	Q99M51	NCK1_MOUSE	Nck1	Cytoplasmic protein NCK1
AFVPVIKL	E	C	8	2	0.8085	1	0			sp|Q61183|PAPOA_MOUSE	Q61183	PAPOA_MOUSE	Papola	Poly(A) polymerase alpha	Papolb	sp|Q9WVP6|PAPOB_MOUSE
AFVRLPSL	I	K	8	2	0.9894	4	0			sp|Q9CUS9|SPPL3_MOUSE	Q9CUS9	SPPL3_MOUSE	Sppl3	Signal peptide peptidase-like 3
AFWKGSEL	G	G	8	2	0.9798	1	0			sp|O35954|PITM1_MOUSE	O35954	PITM1_MOUSE	Pitpnm1	Membrane-associated phosphatidylinositol transfer protein 1
AFYKISTL	E	Y	8	2	0.8723	1	0			sp|Q91YW3|DNJC3_MOUSE	Q91YW3	DNJC3_MOUSE	Dnajc3	DnaJ homolog subfamily C member 3
AFYNLAQM	L	H	8	2	0.9916	2	0	8M(15.9949)		sp|Q9Z2G6|SE1L1_MOUSE	Q9Z2G6	SE1L1_MOUSE	Sel1l	Protein sel-1 homolog 1
AFYQFVNNL	E	S	9	2	0.9998	15	0			sp|Q9WTV7|RNF12_MOUSE	Q9WTV7	RNF12_MOUSE	Rlim	E3 ubiquitin-protein ligase RLIM
AFYRLADL	A	F	8	2	0.9616	1	0			sp|Q9QYC0|ADDA_MOUSE	Q9QYC0	ADDA_MOUSE	Add1	Alpha-adducin
AFYRLISGL	R	H	9	2	0.994	3	0			sp|Q8R180|ERO1A_MOUSE	Q8R180	ERO1A_MOUSE	Ero1a	ERO1-like protein alpha
AFYSIVGL	S	S	8	2	0.9828	2	0			sp|Q9DBG6|RPN2_MOUSE	Q9DBG6	RPN2_MOUSE	Rpn2	Dolichyl-diphosphooligosaccharide--protein glycosyltransferase subunit 2
AFYTVAHL	M	L	8	2	0.9832	1	0			sp|Q8BMJ2|SYLC_MOUSE	Q8BMJ2	SYLC_MOUSE	Lars1	Leucine--tRNA ligase, cytoplasmic
AFYYIHNL	E	V	8	2	0.9989	14	0			sp|Q9QYC0|ADDA_MOUSE	Q9QYC0	ADDA_MOUSE	Add1	Alpha-adducin
AFYYPSRL	K	S	8	2	0.9756	1	0			sp|Q6P5C7|ZN728_MOUSE	Q6P5C7	ZN728_MOUSE	Znf728	Zinc finger protein 728
AGEYDHLPE	L	Q	9	2	0.9459	1	0			sp|P56480|ATPB_MOUSE	P56480	ATPB_MOUSE	Atp5f1b	ATP synthase subunit beta, mitochondrial
AGFAFLTGV	L	G	9	2	0.9909	11	0			sp|Q9D2C7|BI1_MOUSE	Q9D2C7	BI1_MOUSE	Tmbim6	Bax inhibitor 1
AGFAGDDAPR	K	A	10	2	0.9977	3	0			sp|P60710|ACTB_MOUSE	P60710	ACTB_MOUSE	Actb	Actin, cytoplasmic 1	Acta1, Acta2, Actc1, Actg1, Actg2	sp|P62737|ACTA_MOUSE, sp|P63260|ACTG_MOUSE, sp|P63268|ACTH_MOUSE, sp|P68033|ACTC_MOUSE, sp|P68134|ACTS_MOUSE
AGFDFKQL	S	Y	8	2	0.9997	2	0			sp|Q0VEE6|ZN800_MOUSE	Q0VEE6	ZN800_MOUSE	Znf800	Zinc finger protein 800
AGFGGVGRM	M	G	9	2	0.9962	1	0	9M(15.9949)		sp|Q8C854|MYEF2_MOUSE	Q8C854	MYEF2_MOUSE	Myef2	Myelin expression factor 2
AGFGNVNLGYTL	A	N	12	2	1	13	0			sp|Q64253|LY6E_MOUSE	Q64253	LY6E_MOUSE	Ly6e	Lymphocyte antigen 6E
AGFLFQKV	C	G	8	2	0.9967	3	0			sp|Q9DB70|FUND1_MOUSE	Q9DB70	FUND1_MOUSE	Fundc1	FUN14 domain-containing protein 1
AGFSHLLSM	I	K	9	2	0.8855	1	0	9M(15.9949)		sp|Q5SSI6|UTP18_MOUSE	Q5SSI6	UTP18_MOUSE	Utp18	U3 small nucleolar RNA-associated protein 18 homolog
AGHFNIENI	P	D	9	2	0.9595	1	0			sp|Q9CX66|NOPC1_MOUSE	Q9CX66	NOPC1_MOUSE	Nopchap1	NOP protein chaperone 1
AGIALNDNF	G	V	9	2	0.9997	4	0			sp|P16858|G3P_MOUSE	P16858	G3P_MOUSE	Gapdh	Glyceraldehyde-3-phosphate dehydrogenase	Gapdhs	sp|Q64467|G3PT_MOUSE
AGIENDEAF	I	A	9	2	0.9964	6	0			sp|O08585|CLCA_MOUSE	O08585	CLCA_MOUSE	Clta	Clathrin light chain A
AGIENKFGL	F	Y	9	2	0.9998	11	0			sp|Q8BH59|S2512_MOUSE	Q8BH59	S2512_MOUSE	Slc25a12	Electrogenic aspartate/glutamate antiporter SLC25A12, mitochondrial	Slc25a13	sp|Q9QXX4|S2513_MOUSE
AGIENKFGLYL	F	P	11	2	0.9967	12	0			sp|Q8BH59|S2512_MOUSE	Q8BH59	S2512_MOUSE	Slc25a12	Electrogenic aspartate/glutamate antiporter SLC25A12, mitochondrial	Slc25a13	sp|Q9QXX4|S2513_MOUSE
AGIENKFGLYLP	F	K	12	2	0.9953	6	0			sp|Q8BH59|S2512_MOUSE	Q8BH59	S2512_MOUSE	Slc25a12	Electrogenic aspartate/glutamate antiporter SLC25A12, mitochondrial	Slc25a13	sp|Q9QXX4|S2513_MOUSE
AGIENYFIGL	I	V	10	2	0.999	16	0			sp|Q9R007|CLC5A_MOUSE	Q9R007	CLC5A_MOUSE	Clec5a	C-type lectin domain family 5 member A
AGIERMGL	G	A	8	2	0.9878	3	0	6M(15.9949)		sp|Q9D0E1|HNRPM_MOUSE	Q9D0E1	HNRPM_MOUSE	Hnrnpm	Heterogeneous nuclear ribonucleoprotein M
AGIERMGLAM	G	G	10	2	0.9998	11	0	10M(15.9949), 6M(15.9949)		sp|Q9D0E1|HNRPM_MOUSE	Q9D0E1	HNRPM_MOUSE	Hnrnpm	Heterogeneous nuclear ribonucleoprotein M
AGIGFYQHL	V	L	9	2	0.9996	2	0			sp|Q6ZPY2|SMG5_MOUSE	Q6ZPY2	SMG5_MOUSE	Smg5	Nonsense-mediated mRNA decay factor SMG5
AGIINHGYA	L	R	9	2	0.9933	2	0			sp|Q6PDQ2|CHD4_MOUSE	Q6PDQ2	CHD4_MOUSE	Chd4	Chromodomain-helicase-DNA-binding protein 4
AGIKNSTEF	P	V	9	2	0.9039	1	0			sp|A0A0G2JDV3|GBP6_MOUSE	A0A0G2JDV3	GBP6_MOUSE	Gbp6	Guanylate-binding protein 6
AGIKSTIAI	K	E	9	2	0.9474	1	0			sp|Q9ES00|UBE4B_MOUSE	Q9ES00	UBE4B_MOUSE	Ube4b	Ubiquitin conjugation factor E4 B
AGILDTETL	V	E	9	2	0.9284	1	0			sp|Q9QXS1|PLEC_MOUSE	Q9QXS1	PLEC_MOUSE	Plec	Plectin
AGILFATL	I	S	8	2	0.8624	1	0			sp|Q9WVC3|CAV2_MOUSE	Q9WVC3	CAV2_MOUSE	Cav2	Caveolin-2
AGILNHYLI	F	F	9	2	0.9953	5	0			sp|P30355|AL5AP_MOUSE	P30355	AL5AP_MOUSE	Alox5ap	Arachidonate 5-lipoxygenase-activating protein
AGIYNLDDL	P	K	9	2	0.9745	3	0			sp|O08811|ERCC2_MOUSE	O08811	ERCC2_MOUSE	Ercc2	General transcription and DNA repair factor IIH helicase subunit XPD
AGIYNTTEL	L	V	9	2	0.9992	5	0			sp|Q8K1Z0|COQ9_MOUSE	Q8K1Z0	COQ9_MOUSE	Coq9	Ubiquinone biosynthesis protein COQ9, mitochondrial
AGKLNTSYM	S	V	9	2	0.9984	1	0	9M(15.9949)		sp|G3X912|SPRTN_MOUSE	G3X912	SPRTN_MOUSE	Sprtn	DNA-dependent metalloprotease SPRTN
AGLDPVGRIQM	T	R	11	2	0.9363	1	0	11M(15.9949)		sp|P62880|GBB2_MOUSE	P62880	GBB2_MOUSE	Gnb2	Guanine nucleotide-binding protein G(I)/G(S)/G(T) subunit beta-2
AGLENPITV	Q	L	9	2	0.7495	1	0			sp|Q7TN22|TXD16_MOUSE	Q7TN22	TXD16_MOUSE	Txndc16	Thioredoxin domain-containing protein 16
AGLEVYPSI	N	L	9	2	0.983	2	0			sp|P43406|ITAV_MOUSE	P43406	ITAV_MOUSE	Itgav	Integrin alpha-V
AGLEYVLHF	L	T	9	2	0.9983	3	0			sp|Q9JJ80|RPF2_MOUSE	Q9JJ80	RPF2_MOUSE	Rpf2	Ribosome production factor 2 homolog
AGLHNISPQM	Y	S	10	2	0.9411	1	0	10M(15.9949)		sp|Q62441|TLE4_MOUSE	Q62441	TLE4_MOUSE	Tle4	Transducin-like enhancer protein 4
AGLKNIANTLM	R	A	11	2	0.9929	1	0	11M(15.9949)		sp|Q91YR7|PRP6_MOUSE	Q91YR7	PRP6_MOUSE	Prpf6	Pre-mRNA-processing factor 6
AGLKNLNVV	K	F	9	2	0.8619	1	0			sp|Q8BGW5|SOSB2_MOUSE	Q8BGW5	SOSB2_MOUSE	Nabp1	S
AGLKNLNVVFI	K	V	11	2	0.9768	3	0			sp|Q8BGW5|SOSB2_MOUSE	Q8BGW5	SOSB2_MOUSE	Nabp1	S
AGLLFRTL	L	I	8	2	0.9744	1	0			sp|A3KGS3|RGPA2_MOUSE	A3KGS3	RGPA2_MOUSE	Ralgapa2	Ral GTPase-activating protein subunit alpha-2
AGLLNNPHFI	I	T	10	2	0.9998	13	0			sp|Q8BJU0|SGTA_MOUSE	Q8BJU0	SGTA_MOUSE	Sgta	Small glutamine-rich tetratricopeptide repeat-containing protein alpha
AGLQFPVGR	R	V	9	2	0.9956	3	0			sp|Q64523|H2A2C_MOUSE	Q64523	H2A2C_MOUSE	H2ac20	Histone H2A type 2-C	H2ac11, H2ac12, H2ac13, H2ac15, H2ac21, H2ac25, H2ac4, H2ac6, H2ac7, H2ac8, H2aj, H2ax, H2az1, H2az2, Hist1h2af, Hist1h2an, Hist1h2ao, Hist1h2ap, Hist2h2aa2	sp|C0HKE1|H2A1B_MOUSE, sp|C0HKE2|H2A1C_MOUSE, sp|C0HKE3|H2A1D_MOUSE, sp|C0HKE4|H2A1E_MOUSE, sp|C0HKE5|H2A1G_MOUSE, sp|C0HKE6|H2A1I_MOUSE, sp|C0HKE7|H2A1N_MOUSE, sp|C0HKE8|H2A1O_MOUSE, sp|C0HKE9|H2A1P_MOUSE, sp|P0C0S6|H2AZ_MOUSE, sp|P27661|H2AX_MOUSE, sp|Q3THW5|H2AV_MOUSE, sp|Q64522|H2A2B_MOUSE, sp|Q6GSS7|H2A2A_MOUSE, sp|Q8BFU2|H2A3_MOUSE, sp|Q8CGP5|H2A1F_MOUSE, sp|Q8CGP6|H2A1H_MOUSE, sp|Q8CGP7|H2…
AGLQNPNSL	P	S	9	2	0.9939	2	0			sp|Q8BUL6|PKHA1_MOUSE	Q8BUL6	PKHA1_MOUSE	Plekha1	Pleckstrin homology domain-containing family A member 1
AGLQRDLLM	E	H	9	2	0.9304	1	0	9M(15.9949)		sp|Q91W86|VPS11_MOUSE	Q91W86	VPS11_MOUSE	Vps11	Vacuolar protein sorting-associated protein 11 homolog
AGLRLLTNM	L	T	9	2	0.9975	3	0	9M(15.9949)		sp|Q9D0L7|ARM10_MOUSE	Q9D0L7	ARM10_MOUSE	Armc10	Armadillo repeat-containing protein 10	Armcx1, Armcx3	sp|Q8BHS6|ARMX3_MOUSE, sp|Q9CX83|ARMX1_MOUSE
AGLRNAVSQM	N	R	10	2	0.9999	3	0	10M(15.9949)		sp|Q6PHN1|CCD57_MOUSE	Q6PHN1	CCD57_MOUSE	Ccdc57	Coiled-coil domain-containing protein 57
AGLSNIPDLAL	E	A	11	2	0.9948	5	0			sp|O54824|IL16_MOUSE	O54824	IL16_MOUSE	Il16	Pro-interleukin-16
AGLTHGINL	Q	A	9	2	0.7284	1	0			sp|Q8CDA1|SAC2_MOUSE	Q8CDA1	SAC2_MOUSE	Inpp5f	Phosphatidylinositide phosphatase SAC2
AGLTHLITM	K	D	9	2	0.9999	53	0	9M(15.9949)		sp|Q8R574|KPRB_MOUSE	Q8R574	KPRB_MOUSE	Prpsap2	Phosphoribosyl pyrophosphate synthase-associated protein 2
AGLTHQDAL	M	Q	9	2	0.994	2	0			sp|O54824|IL16_MOUSE	O54824	IL16_MOUSE	Il16	Pro-interleukin-16
AGLTHVTSL	S	H	9	2	0.9996	4	0			sp|Q9D0R9|WDR89_MOUSE	Q9D0R9	WDR89_MOUSE	Wdr89	WD repeat-containing protein 89
AGLTMNDIDAFEFHEA	K	F	16	2	0.9891	1	0	5M(15.9949)		sp|Q99JY0|ECHB_MOUSE	Q99JY0	ECHB_MOUSE	Hadhb	Trifunctional enzyme subunit beta, mitochondrial
AGLTNVEYA	G	H	9	2	0.9538	1	0			sp|Q8K370|ACD10_MOUSE	Q8K370	ACD10_MOUSE	Acad10	Acyl-CoA dehydrogenase family member 10
AGLVFLHL	F	M	8	2	0.9632	1	0			sp|Q9R049|AMFR_MOUSE	Q9R049	AMFR_MOUSE	Amfr	E3 ubiquitin-protein ligase AMFR
AGLVNIVSF	T	D	9	2	0.9865	11	0			sp|Q8BJL0|SMAL1_MOUSE	Q8BJL0	SMAL1_MOUSE	Smarcal1	SWI/SNF-related matrix-associated actin-dependent regulator of chromatin subfamily A-like protein 1
AGMERMGAGL	G	G	10	2	0.9988	2	0	3M(15.9949), 6M(15.9949)		sp|Q9D0E1|HNRPM_MOUSE	Q9D0E1	HNRPM_MOUSE	Hnrnpm	Heterogeneous nuclear ribonucleoprotein M
AGMPGYQVL	A	A	9	2	0.9736	1	0	3M(15.9949)		sp|Q80U58|PUM2_MOUSE	Q80U58	PUM2_MOUSE	Pum2	Pumilio homolog 2
AGNFYVPAEPK	K	L	11	2	0.8347	1	0			sp|P14148|RL7_MOUSE	P14148	RL7_MOUSE	Rpl7	60S ribosomal protein L7
AGNINQSLL	E	T	9	2	0.9538	1	0			sp|Q6P9P6|KIF11_MOUSE	Q6P9P6	KIF11_MOUSE	Kif11	Kinesin-like protein KIF11
AGNINQSLM	E	T	9	2	0.9884	2	0	9M(15.9949)		sp|E9Q5G3|KIF23_MOUSE	E9Q5G3	KIF23_MOUSE	Kif23	Kinesin-like protein KIF23
AGNINQSLMTL	E	R	11	2	0.91	1	0	9M(15.9949)		sp|E9Q5G3|KIF23_MOUSE	E9Q5G3	KIF23_MOUSE	Kif23	Kinesin-like protein KIF23
AGPDRVAGL	E	Q	9	2	0.9782	1	0			sp|P41230|KDM5C_MOUSE	P41230	KDM5C_MOUSE	Kdm5c	Lysine-specific demethylase 5C
AGPENIPEPM	Q	S	10	2	0.8781	1	0	10M(15.9949)		sp|Q8K2L8|TPC12_MOUSE	Q8K2L8	TPC12_MOUSE	Trappc12	Trafficking protein particle complex subunit 12
AGPENSSKI	I	G	9	2	0.9997	13	0			sp|Q80XK6|ATG2B_MOUSE	Q80XK6	ATG2B_MOUSE	Atg2b	Autophagy-related protein 2 homolog B
AGPEYKGL	S	S	8	2	0.9826	2	0			sp|Q07113|MPRI_MOUSE	Q07113	MPRI_MOUSE	Igf2r	Cation-independent mannose-6-phosphate receptor
AGPGFINVHL	I	R	10	2	0.9999	4	0			sp|Q9D0I9|SYRC_MOUSE	Q9D0I9	SYRC_MOUSE	Rars1	Arginine--tRNA ligase, cytoplasmic
AGPGNHVQL	H	R	9	2	0.9707	1	0			sp|Q8BXJ2|TREF1_MOUSE	Q8BXJ2	TREF1_MOUSE	Trerf1	Transcriptional-regulating factor 1
AGPPYYEGV	V	A	9	2	0.9963	2	0			sp|P10404|ENV1_MOUSE	P10404	ENV1_MOUSE		MLV-related proviral Env polyprotein
AGPQGAQEV	G	K	9	2	0.9674	2	0			sp|Q9Z2B9|KS6A4_MOUSE	Q9Z2B9	KS6A4_MOUSE	Rps6ka4	Ribosomal protein S6 kinase alpha-4
AGPRGMGTAL	P	K	10	2	0.7852	2	0	6M(15.9949)		sp|O35129|PHB2_MOUSE	O35129	PHB2_MOUSE	Phb2	Prohibitin-2
AGPRLIVYI	R	V	9	2	0.9952	2	0			sp|Q64324|STXB2_MOUSE	Q64324	STXB2_MOUSE	Stxbp2	Syntaxin-binding protein 2
AGPSHVAAM	S	N	9	2	0.9982	5	0	9M(15.9949)		sp|Q9EPU0|RENT1_MOUSE	Q9EPU0	RENT1_MOUSE	Upf1	Regulator of nonsense transcripts 1
AGPSLKTTL	R	K	9	2	0.8343	1	0			sp|Q8C8M1|SHCAF_MOUSE	Q8C8M1	SHCAF_MOUSE	Sinhcaf	SIN3-HDAC complex-associated factor
AGPSNFGTEL	S	N	10	2	0.9986	8	0			sp|P0C090|RC3H2_MOUSE	P0C090	RC3H2_MOUSE	Rc3h2	Roquin-2
AGPSRTVGL	N	F	9	2	0.9988	3	0			sp|Q64521|GPDM_MOUSE	Q64521	GPDM_MOUSE	Gpd2	Glycerol-3-phosphate dehydrogenase, mitochondrial
AGPTFNYL	E	L	8	2	0.9971	8	0			sp|Q01320|TOP2A_MOUSE	Q01320	TOP2A_MOUSE	Top2a	DNA topoisomerase 2-alpha
AGPTNSLKYVP	C	L	11	2	0.9999	2	0			sp|Q8BMI0|FBX38_MOUSE	Q8BMI0	FBX38_MOUSE	Fbxo38	F-box only protein 38
AGPTNVHLI	A	N	9	2	0.9999	17	0			sp|P70178|SIX5_MOUSE	P70178	SIX5_MOUSE	Six5	Homeobox protein SIX5
AGPVGMVTL	G	L	9	2	0.9297	1	0	6M(15.9949)		sp|Q64442|DHSO_MOUSE	Q64442	DHSO_MOUSE	Sord	Sorbitol dehydrogenase
AGPWYRNL	F	F	8	2	0.999	2	0			sp|P98195|ATP9B_MOUSE	P98195	ATP9B_MOUSE	Atp9b	Probable phospholipid-transporting ATPase IIB
AGQFNQDYL	Y	S	9	2	0.9999	22	0			sp|P97384|ANX11_MOUSE	P97384	ANX11_MOUSE	Anxa11	Annexin A11
AGSGNPNPQGYPGAW	L	G	15	2	0.8641	1	0			sp|P16110|LEG3_MOUSE	P16110	LEG3_MOUSE	Lgals3	Galectin-3
AGSKNIDIM	R	A	9	2	0.9965	3	0	9M(15.9949)		sp|A2AWL7|MGAP_MOUSE	A2AWL7	MGAP_MOUSE	Mga	MAX gene-associated protein
AGSLILPAPPI	A	V	11	2	0.8256	1	0			sp|Q80T14|FRAS1_MOUSE	Q80T14	FRAS1_MOUSE	Fras1	Extracellular matrix organizing protein FRAS1
AGSNFPEHI	Y	F	9	2	0.9897	2	0			sp|P61161|ARP2_MOUSE	P61161	ARP2_MOUSE	Actr2	Actin-related protein 2
AGSSEPVTGLD	G	A	11	2	0.7822	1	0			iRT-pepB	iRT-pepB	iRT-pepB		iRT-pepB
AGSSEPVTGLDAK	G	-	13	2, 3	1	177	0			iRT-pepB	iRT-pepB	iRT-pepB		iRT-pepB
AGTANVMHL	A	L	9	2	0.9982	2	0	7M(15.9949)		sp|Q8K0Q5|RHG18_MOUSE	Q8K0Q5	RHG18_MOUSE	Arhgap18	Rho GTPase-activating protein 18
AGTRNIYYL	Q	C	9	2	0.9945	8	0			sp|Q9CQN1|TRAP1_MOUSE	Q9CQN1	TRAP1_MOUSE	Trap1	Heat shock protein 75 kDa, mitochondrial
AGVGAGLAYL	V	I	10	2	0.9699	4	0			sp|P97287|MCL1_MOUSE	P97287	MCL1_MOUSE	Mcl1	Induced myeloid leukemia cell differentiation protein Mcl-1 homolog
AGVRNPQQHL	A	N	10	2	0.9992	2	0			sp|P29341|PABP1_MOUSE	P29341	PABP1_MOUSE	Pabpc1	Polyadenylate-binding protein 1
AGVRNPQQHLN	A	A	11	3	0.9998	1	0			sp|P29341|PABP1_MOUSE	P29341	PABP1_MOUSE	Pabpc1	Polyadenylate-binding protein 1
AGVSNASRV	E	N	9	2	0.999	3	0			sp|Q8VDD9|PHIP_MOUSE	Q8VDD9	PHIP_MOUSE	Phip	PH-interacting protein
AGVSNIIEF	Q	G	9	2	0.9956	26	0			sp|Q9D2L9|F111A_MOUSE	Q9D2L9	F111A_MOUSE	Fam111a	Serine protease FAM111A
AGVTLHEAL	G	A	9	2	0.9779	1	0			sp|P40142|TKT_MOUSE	P40142	TKT_MOUSE	Tkt	Transketolase	Tktl1, Tktl2	sp|Q99MX0|TKTL1_MOUSE, sp|Q9D4D4|TKTL2_MOUSE
AGVVNKYEV	P	N	9	2	0.9999	4	0			sp|O88455|DHCR7_MOUSE	O88455	DHCR7_MOUSE	Dhcr7	7-dehydrocholesterol reductase
AGYDYKVM	S	V	8	2	0.9952	2	0	8M(15.9949)		sp|Q8C0P5|COR2A_MOUSE	Q8C0P5	COR2A_MOUSE	Coro2a	Coronin-2A
AGYDYKVMV	S	W	9	2	0.9939	1	0	8M(15.9949)		sp|Q8C0P5|COR2A_MOUSE	Q8C0P5	COR2A_MOUSE	Coro2a	Coronin-2A
AGYDYLAL	N	K	8	2	0.9539	1	0			sp|Q9CQS5|RIOK2_MOUSE	Q9CQS5	RIOK2_MOUSE	Riok2	Serine/threonine-protein kinase RIO2
AGYGRSPGSLSL	A	H	12	2	0.9613	1	0			sp|P09450|JUNB_MOUSE	P09450	JUNB_MOUSE	Junb	Transcription factor JunB
AGYMYTQL	S	M	8	2	0.9995	15	0	4M(15.9949)		sp|A2AN08|UBR4_MOUSE	A2AN08	UBR4_MOUSE	Ubr4	E3 ubiquitin-protein ligase UBR4
AGYMYTQLM	S	E	9	2	0.9933	3	0	4M(15.9949), 9M(15.9949)		sp|A2AN08|UBR4_MOUSE	A2AN08	UBR4_MOUSE	Ubr4	E3 ubiquitin-protein ligase UBR4
AGYSFEKL	Y	F	8	2	0.9903	3	0			sp|Q91Y86|MK08_MOUSE	Q91Y86	MK08_MOUSE	Mapk8	Mitogen-activated protein kinase 8
AGYSGQNSM	G	G	9	2	0.9999	2	0	9M(15.9949)		sp|Q9Z2X1|HNRPF_MOUSE	Q9Z2X1	HNRPF_MOUSE	Hnrnpf	Heterogeneous nuclear ribonucleoprotein F
AGYTFEYL	S	I	8	2	0.9917	1	0			sp|Q811J3|IREB2_MOUSE	Q811J3	IREB2_MOUSE	Ireb2	Iron-responsive element-binding protein 2
AGYTFGQDI	G	S	9	2	0.7373	1	0			sp|P62715|PP2AB_MOUSE	P62715	PP2AB_MOUSE	Ppp2cb	Serine/threonine-protein phosphatase 2A catalytic subunit beta isoform	Ppp2ca	sp|P63330|PP2AA_MOUSE
AGYVTHLM	I	K	8	2	0.995	3	0	8M(15.9949)		sp|P63276|RS17_MOUSE	P63276	RS17_MOUSE	Rps17	40S ribosomal protein S17
AHIKLSNL	N	Y	8	2	0.9734	1	0			sp|F6ZDS4|TPR_MOUSE	F6ZDS4	TPR_MOUSE	Tpr	Nucleoprotein TPR
AHINALEYI	Y	I	9	2	0.9013	1	0			sp|P26673|A47_VACCW	P26673	A47_VACCW	VACWR173	Protein A47
AHPGMMQEL	F	Q	9	2	0.9557	1	0	5M(15.9949), 6M(15.9949)		sp|Q8VBT6|APOBR_MOUSE	Q8VBT6	APOBR_MOUSE	Apobr	Apolipoprotein B receptor
AHPGPVNSEL	A	F	10	2	0.9822	2	0			sp|Q5SS80|DHR13_MOUSE	Q5SS80	DHR13_MOUSE	Dhrs13	Dehydrogenase/reductase SDR family member 13
AHPISQEYL	L	K	9	2	0.8895	2	0			sp|Q9Z160|COG1_MOUSE	Q9Z160	COG1_MOUSE	Cog1	Conserved oligomeric Golgi complex subunit 1
AHQVNLEYL	M	S	9	2	0.9978	1	0			sp|Q811J3|IREB2_MOUSE	Q811J3	IREB2_MOUSE	Ireb2	Iron-responsive element-binding protein 2
AHVGQLTGM	F	Y	9	2	0.996	1	0	9M(15.9949)		sp|Q99PV0|PRP8_MOUSE	Q99PV0	PRP8_MOUSE	Prpf8	Pre-mRNA-processing-splicing factor 8
AHVIFQNV	F	A	8	2	0.9793	1	0			sp|Q3UKC1|TAXB1_MOUSE	Q3UKC1	TAXB1_MOUSE	Tax1bp1	Tax1-binding protein 1 homolog
AHYTYNNL	Q	S	8	2	0.9761	3	0			sp|Q8BLV3|SL9A7_MOUSE	Q8BLV3	SL9A7_MOUSE	Slc9a7	Sodium/hydrogen exchanger 7	Slc9a9	sp|Q8BZ00|SL9A9_MOUSE
AIAEFARSL	L	L	9	2	0.9931	2	0			sp|P11983|TCPA_MOUSE	P11983	TCPA_MOUSE	Tcp1	T-complex protein 1 subunit alpha
AIAPNVTVM	M	V	9	2	0.9936	3	0	9M(15.9949)		sp|Q6DFW4|NOP58_MOUSE	Q6DFW4	NOP58_MOUSE	Nop58	Nucleolar protein 58
AIDVTKVNPL	Y	-	10	2	0.9992	19	0			sp|P23373|E10_VACCW	P23373	E10_VACCW	VACWR066	Probable FAD-linked sulfhydryl oxidase E10
AIENIDTL	R	T	8	2	0.9705	2	0			sp|Q3UM45|PP1R7_MOUSE	Q3UM45	PP1R7_MOUSE	Ppp1r7	Protein phosphatase 1 regulatory subunit 7
AIFESPYPM	C	T	9	2	0.985	2	0	9M(15.9949)		sp|O55143|AT2A2_MOUSE	O55143	AT2A2_MOUSE	Atp2a2	Sarcoplasmic/endoplasmic reticulum calcium ATPase 2
AIFEYIDRL	V	F	9	2	0.9913	2	0			sp|Q9DBR1|XRN2_MOUSE	Q9DBR1	XRN2_MOUSE	Xrn2	5'-3' exoribonuclease 2
AIFKAFAM	N	I	8	2	0.8082	2	0	8M(15.9949)		sp|P60335|PCBP1_MOUSE	P60335	PCBP1_MOUSE	Pcbp1	Poly(rC)-binding protein 1	Pcbp2, Pcbp3	sp|P57722|PCBP3_MOUSE, sp|Q61990|PCBP2_MOUSE
AIFKKTVAM	L	H	9	2	0.9951	5	0	9M(15.9949)		sp|Q6P8X1|SNX6_MOUSE	Q6P8X1	SNX6_MOUSE	Snx6	Sorting nexin-6	Snx32	sp|Q80ZJ7|SNX32_MOUSE
AIFNFQSL	S	L	8	2	0.9992	22	0			sp|Q9CR64|KISHA_MOUSE	Q9CR64	KISHA_MOUSE	Tmem167a	Protein kish-A
AIFSRDVEEVRSLL	Q	S	14	3	0.9899	2	0			sp|Q8BTI7|ANR52_MOUSE	Q8BTI7	ANR52_MOUSE	Ankrd52	Serine/threonine-protein phosphatase 6 regulatory ankyrin repeat subunit C
AIFVPIHL	G	V	8	2	0.9953	5	0			sp|Q3TEI4|CO039_MOUSE	Q3TEI4	CO039_MOUSE		Uncharacterized protein C15orf39 homolog
AIFYFVNKL	Y	D	9	2	0.9962	1	0			sp|Q8BH24|TM9S4_MOUSE	Q8BH24	TM9S4_MOUSE	Tm9sf4	Transmembrane 9 superfamily member 4
AIGGGLAGSEL	P	R	11	2	0.9961	1	0			sp|Q8BGQ4|POMT2_MOUSE	Q8BGQ4	POMT2_MOUSE	Pomt2	Protein O-mannosyl-transferase 2
AIGTGREVL	A	T	9	2	0.971	3	0			sp|Q6P5E8|DGKQ_MOUSE	Q6P5E8	DGKQ_MOUSE	Dgkq	Diacylglycerol kinase theta
AIHNFDFL	D	K	8	2	0.9715	3	0			sp|Q5XF89|AT133_MOUSE	Q5XF89	AT133_MOUSE	Atp13a3	Polyamine-transporting ATPase 13A3
AIHNFPAV	T	Q	8	2	0.8379	1	0			sp|Q3TLH4|PRC2C_MOUSE	Q3TLH4	PRC2C_MOUSE	Prrc2c	Protein PRRC2C
AIHNFVEV	E	L	8	2	0.9828	2	0			sp|P62743|AP2S1_MOUSE	P62743	AP2S1_MOUSE	Ap2s1	AP-2 complex subunit sigma
AIHNSTKV	S	A	8	2	0.773	1	0			sp|Q80SU7|GVIN1_MOUSE	Q80SU7	GVIN1_MOUSE	Gvin1	Interferon-induced very large GTPase 1
AIHTFRQV	A	R	8	2	0.965	1	0			sp|O89109|KCNN4_MOUSE	O89109	KCNN4_MOUSE	Kcnn4	Intermediate conductance calcium-activated potassium channel protein 4
AIIAFKTL	K	M	8	2	0.9857	1	0			sp|Q8K4I3|ARHG6_MOUSE	Q8K4I3	ARHG6_MOUSE	Arhgef6	Rho guanine nucleotide exchange factor 6
AIIAFKTLM	K	G	9	2	0.8452	1	0	9M(15.9949)		sp|Q8K4I3|ARHG6_MOUSE	Q8K4I3	ARHG6_MOUSE	Arhgef6	Rho guanine nucleotide exchange factor 6
AIIEYMPL	L	L	8	2	0.973	2	0	6M(15.9949)		sp|Q76MZ3|2AAA_MOUSE	Q76MZ3	2AAA_MOUSE	Ppp2r1a	Serine/threonine-protein phosphatase 2A 65 kDa regulatory subunit A alpha isoform	Ppp2r1b	sp|Q7TNP2|2AAB_MOUSE
AIIEYMPLL	L	A	9	2	0.9996	10	0	6M(15.9949)		sp|Q76MZ3|2AAA_MOUSE	Q76MZ3	2AAA_MOUSE	Ppp2r1a	Serine/threonine-protein phosphatase 2A 65 kDa regulatory subunit A alpha isoform	Ppp2r1b	sp|Q7TNP2|2AAB_MOUSE
AIIKFPLT	Y	T	8	2	0.9574	1	0			sp|P62751|RL23A_MOUSE	P62751	RL23A_MOUSE	Rpl23a	60S ribosomal protein L23a
AIIKFPLTTESAM	Y	K	13	2	1	7	0	13M(15.9949)		sp|P62751|RL23A_MOUSE	P62751	RL23A_MOUSE	Rpl23a	60S ribosomal protein L23a
AIITGFRNV	D	T	9	2	0.998	8	0			sp|Q9Z1S0|BUB1B_MOUSE	Q9Z1S0	BUB1B_MOUSE	Bub1b	Mitotic checkpoint serine/threonine-protein kinase BUB1 beta
AILDFNTM	E	S	8	2	0.9075	2	0	8M(15.9949)		sp|Q3TWN3|CNNM2_MOUSE	Q3TWN3	CNNM2_MOUSE	Cnnm2	Metal transporter CNNM2	Cnnm4	sp|Q69ZF7|CNNM4_MOUSE
AILELDEHL	A	Q	9	2	0.9746	2	0			sp|P97470|PP4C_MOUSE	P97470	PP4C_MOUSE	Ppp4c	Serine/threonine-protein phosphatase 4 catalytic subunit
AILELDTKM	E	K	9	2	0.9828	1	0	9M(15.9949)		sp|Q0HA38|TT21B_MOUSE	Q0HA38	TT21B_MOUSE	Ttc21b	Tetratricopeptide repeat protein 21B
AILENANVL	L	A	9	2	0.9991	2	0			sp|P05063|ALDOC_MOUSE	P05063	ALDOC_MOUSE	Aldoc	Fructose-bisphosphate aldolase C
AILERFPTI	D	G	9	2	0.9753	2	0			sp|P50652|FANCC_MOUSE	P50652	FANCC_MOUSE	Fancc	Fanconi anemia group C protein homolog
AILKFQGL	E	E	8	2	0.9413	1	0			sp|Q9DC29|ABCB6_MOUSE	Q9DC29	ABCB6_MOUSE	Abcb6	ATP-binding cassette sub-family B member 6
AILTMTQL	K	Y	8	2	0.9827	2	0	5M(15.9949)		sp|Q80X82|SYMPK_MOUSE	Q80X82	SYMPK_MOUSE	Sympk	Symplekin
AIMDFRLVDL	K	P	10	2	0.9993	3	0	3M(15.9949)		sp|G5E870|TRIPC_MOUSE	G5E870	TRIPC_MOUSE	Trip12	E3 ubiquitin-protein ligase TRIP12
AIMENANVL	L	A	9	2	0.9995	24	0	3M(15.9949)		sp|P05064|ALDOA_MOUSE	P05064	ALDOA_MOUSE	Aldoa	Fructose-bisphosphate aldolase A
AIMPNGDHI	V	V	9	2	0.9996	22	0	3M(15.9949)		sp|P63005|LIS1_MOUSE	P63005	LIS1_MOUSE	Pafah1b1	Platelet-activating factor acetylhydrolase IB subunit beta
AINIFQKL	K	N	8	2	0.9967	4	0			sp|Q91VJ1|AIM2_MOUSE	Q91VJ1	AIM2_MOUSE	Aim2	Interferon-inducible protein AIM2
AININDNVI	P	N	9	2	0.927	1	0			sp|F6VAN0|ATF6A_MOUSE	F6VAN0	ATF6A_MOUSE	Atf6	Cyclic AMP-dependent transcription factor ATF-6 alpha
AINPKLLQL	Q	V	9	2	0.9897	1	0			sp|Q61656|DDX5_MOUSE	Q61656	DDX5_MOUSE	Ddx5	Probable ATP-dependent RNA helicase DDX5
AINQFTQA	P	L	8	2	0.9956	1	0			sp|P12970|RL7A_MOUSE	P12970	RL7A_MOUSE	Rpl7a	60S ribosomal protein L7a
AINRGVKI	A	R	8	2	0.9807	5	0			sp|P04021|F13_VACCW	P04021	F13_VACCW	VACWR052	Envelope phospholipase F13
AIPAFISL	G	L	8	2	0.9582	1	0			sp|P52293|IMA1_MOUSE	P52293	IMA1_MOUSE	Kpna2	Importin subunit alpha-1
AIPEFMNL	A	G	8	2	0.9972	6	0	6M(15.9949)		sp|Q9QXK3|COPG2_MOUSE	Q9QXK3	COPG2_MOUSE	Copg2	Coatomer subunit gamma-2
AIPELTKL	R	L	8	2	0.9922	2	0			sp|Q02248|CTNB1_MOUSE	Q02248	CTNB1_MOUSE	Ctnnb1	Catenin beta-1
AIQNSTSI	E	K	8	2	0.9507	1	0			sp|A2A432|CUL4B_MOUSE	A2A432	CUL4B_MOUSE	Cul4b	Cullin-4B
AIQRFDNL	E	R	8	2	0.813	1	0			sp|Q9JIF7|COPB_MOUSE	Q9JIF7	COPB_MOUSE	Copb1	Coatomer subunit beta
AIRVFANI	D	L	8	2	0.9906	2	0			sp|Q8QZY1|EIF3L_MOUSE	Q8QZY1	EIF3L_MOUSE	Eif3l	Eukaryotic translation initiation factor 3 subunit L
AISENYQTM	T	S	9	2	0.9987	4	0	9M(15.9949)		sp|P47753|CAZA1_MOUSE	P47753	CAZA1_MOUSE	Capza1	F-actin-capping protein subunit alpha-1	Capza2	sp|P47754|CAZA2_MOUSE
AISNLDYI	S	S	8	2	0.9865	15	0			sp|Q9R0C8|VAV3_MOUSE	Q9R0C8	VAV3_MOUSE	Vav3	Guanine nucleotide exchange factor VAV3
AITTLHNL	Y	L	8	2	0.9805	4	0			sp|Q02248|CTNB1_MOUSE	Q02248	CTNB1_MOUSE	Ctnnb1	Catenin beta-1	Jup	sp|Q02257|PLAK_MOUSE
AITVFSPDGHL	R	F	11	2	0.9993	3	0			sp|Q9Z2U0|PSA7_MOUSE	Q9Z2U0	PSA7_MOUSE	Psma7	Proteasome subunit alpha type-7	Psma8	sp|Q9CWH6|PSMA8_MOUSE
AIVEFATV	N	R	8	2	0.9958	9	0			sp|Q91WT4|DJC17_MOUSE	Q91WT4	DJC17_MOUSE	Dnajc17	DnaJ homolog subfamily C member 17
AIVEFLSNL	K	A	9	2	0.9938	9	0			sp|Q9D0N7|CAF1B_MOUSE	Q9D0N7	CAF1B_MOUSE	Chaf1b	Chromatin assembly factor 1 subunit B
AIVEHLVTL	L	G	9	2	0.9997	30	0			sp|Q9Z1E3|IKBA_MOUSE	Q9Z1E3	IKBA_MOUSE	Nfkbia	NF-kappa-B inhibitor alpha
AIVERAAQL	K	A	9	2	0.9898	8	0			sp|P17932|RL32P_MOUSE	P17932	RL32P_MOUSE	Rpl32-ps	Putative 60S ribosomal protein L32'	Rpl32	sp|P62911|RL32_MOUSE
AIVNYANL	I	N	8	2	0.9998	9	0			sp|Q80HV8|A11_VACCW	Q80HV8	A11_VACCW	VACWR130	Protein A11
AIVPLEARM	R	K	9	2	0.9849	2	0	9M(15.9949)		sp|Q8CGF7|TCRG1_MOUSE	Q8CGF7	TCRG1_MOUSE	Tcerg1	Transcription elongation regulator 1
AIVQFTRTF	E	S	9	2	0.9962	3	0			sp|Q8C1Y8|CCZ1_MOUSE	Q8C1Y8	CCZ1_MOUSE	Ccz1	Vacuolar fusion protein CCZ1 homolog
AIVRNLESL	G	G	9	2	0.9971	3	0			sp|P58064|RT06_MOUSE	P58064	RT06_MOUSE	Mrps6	28S ribosomal protein S6, mitochondrial
AIVSFAHV	D	S	8	2	0.9463	1	0			sp|P43247|MSH2_MOUSE	P43247	MSH2_MOUSE	Msh2	DNA mismatch repair protein Msh2
AIVSFVNQKL	E	E	10	2	0.9949	1	0			sp|Q9ERD8|PARVG_MOUSE	Q9ERD8	PARVG_MOUSE	Parvg	Gamma-parvin
AIYEFIHNF	M	V	9	2	0.9873	1	0			sp|Q9WVL1|AP4S1_MOUSE	Q9WVL1	AP4S1_MOUSE	Ap4s1	AP-4 complex subunit sigma-1
AIYHIVM	L	S	7	2	0.9829	1	0	7M(15.9949)		sp|Q61168|LAPM5_MOUSE	Q61168	LAPM5_MOUSE	Laptm5	Lysosomal-associated transmembrane protein 5
AIYKKSQHM	M	T	9	2	0.999	3	0	9M(15.9949)		sp|P02340|P53_MOUSE	P02340	P53_MOUSE	Tp53	Cellular tumor antigen p53
AIYLVTSL	A	A	8	2	0.8108	1	0			sp|Q9ERK4|XPO2_MOUSE	Q9ERK4	XPO2_MOUSE	Cse1l	Exportin-2
AIYRLPTL	L	D	8	2	0.9946	2	0			sp|Q8BGZ3|DCA12_MOUSE	Q8BGZ3	DCA12_MOUSE	Dcaf12	DDB1- and CUL4-associated factor 12
AIYYFKANV	E	F	9	2	0.9404	1	0			sp|Q9JM76|ARPC3_MOUSE	Q9JM76	ARPC3_MOUSE	Arpc3	Actin-related protein 2/3 complex subunit 3
AIYYFKIAV	G	A	9	2	0.9985	4	0			sp|O55143|AT2A2_MOUSE	O55143	AT2A2_MOUSE	Atp2a2	Sarcoplasmic/endoplasmic reticulum calcium ATPase 2	Atp2a1	sp|Q8R429|AT2A1_MOUSE
AKALANVNIGSL	F	I	12	2	0.9996	2	0			sp|P47955|RLA1_MOUSE	P47955	RLA1_MOUSE	Rplp1	60S acidic ribosomal protein P1
AKFDGILGM	A	G	9	2	0.9975	9	0	9M(15.9949)		sp|P18242|CATD_MOUSE	P18242	CATD_MOUSE	Ctsd	Cathepsin D
AKFDGILGMGYP	A	H	12	2	0.8348	1	0	9M(15.9949)		sp|P18242|CATD_MOUSE	P18242	CATD_MOUSE	Ctsd	Cathepsin D
AKIIVADAM	L	Q	9	2	0.9895	2	0	9M(15.9949)		sp|E9Q555|RN213_MOUSE	E9Q555	RN213_MOUSE	Rnf213	E3 ubiquitin-protein ligase RNF213
AKITAQEAV	T	A	9	2	0.9994	1	0			sp|Q3UEB3|PUF60_MOUSE	Q3UEB3	PUF60_MOUSE	Puf60	Poly(U)-binding-splicing factor PUF60
AKLENAEVL	Q	E	9	2	0.9957	2	0			sp|Q9JHE6|HES6_MOUSE	Q9JHE6	HES6_MOUSE	Hes6	Transcription cofactor HES-6
AKLLNEEVL	K	S	9	2	0.9413	2	0			sp|Q6ZWR6|SYNE1_MOUSE	Q6ZWR6	SYNE1_MOUSE	Syne1	Nesprin-1
AKLVNQEVL	L	A	9	2	0.9998	9	0			sp|Q91VD9|NDUS1_MOUSE	Q91VD9	NDUS1_MOUSE	Ndufs1	NADH-ubiquinone oxidoreductase 75 kDa subunit, mitochondrial
AKVDATADYI	A	C	10	2	0.9952	2	0			sp|Q91V92|ACLY_MOUSE	Q91V92	ACLY_MOUSE	Acly	ATP-citrate synthase
AKVVLAEVI	Q	Q	9	2	0.9921	2	0			sp|O35127|C10_MOUSE	O35127	C10_MOUSE	Grcc10	Protein C10
AKYLFTSL	F	L	8	2	0.9975	1	0			sp|Q80TB7|ZSWM6_MOUSE	Q80TB7	ZSWM6_MOUSE	Zswim6	Zinc finger SWIM domain-containing protein 6
ALAAAGYDVEK	K	N	11	2	0.9994	2	0			sp|P43277|H13_MOUSE	P43277	H13_MOUSE	H1-3	Histone H1.3	H1-2, H1-4, H1-6	sp|P15864|H12_MOUSE, sp|P43274|H14_MOUSE, sp|Q07133|H1T_MOUSE
ALANHLIKV	F	K	9	2	0.9219	1	0			sp|Q9WVK4|EHD1_MOUSE	Q9WVK4	EHD1_MOUSE	Ehd1	EH domain-containing protein 1	Ehd3	sp|Q9QXY6|EHD3_MOUSE
ALDNFLDKL	P	-	9	2	0.9979	5	0			sp|P58252|EF2_MOUSE	P58252	EF2_MOUSE	Eef2	Elongation factor 2
ALDVANKIGII	D	-	11	2	1	5	0			sp|P62751|RL23A_MOUSE	P62751	RL23A_MOUSE	Rpl23a	60S ribosomal protein L23a
ALEEQLQQIRAE	S	T	12	2	0.9982	1	0			sp|P02535|K1C10_MOUSE	P02535	K1C10_MOUSE	Krt10	Keratin, type I cytoskeletal 10
ALENDKTI	A	K	8	2	0.9492	1	0			sp|P61965|WDR5_MOUSE	P61965	WDR5_MOUSE	Wdr5	WD repeat-containing protein 5	Wdr5b	sp|Q9D7H2|WDR5B_MOUSE
ALENLRVYL	D	C	9	2	0.9965	1	0			sp|Q9Z0H7|BCL10_MOUSE	Q9Z0H7	BCL10_MOUSE	Bcl10	B-cell lymphoma/leukemia 10
ALENTTSI	C	L	8	2	0.9771	1	0			sp|Q3U5F4|YRDC_MOUSE	Q3U5F4	YRDC_MOUSE	Yrdc	Threonylcarbamoyl-AMP synthase
ALFGNTEYL	K	M	9	2	0.9596	1	0			sp|Q8R1E7|TM234_MOUSE	Q8R1E7	TM234_MOUSE	Tmem234	Transmembrane protein 234
ALFKGDNL	E	P	8	2	0.9976	2	0			sp|Q6A0A2|LAR4B_MOUSE	Q6A0A2	LAR4B_MOUSE	Larp4b	La-related protein 4B
ALFQPSFL	E	G	8	2	0.9707	4	0			sp|P60710|ACTB_MOUSE	P60710	ACTB_MOUSE	Actb	Actin, cytoplasmic 1	Actg1	sp|P63260|ACTG_MOUSE
ALFRIGQM	S	N	8	2	0.9889	1	0	8M(15.9949)		sp|O70496|CLCN7_MOUSE	O70496	CLCN7_MOUSE	Clcn7	H(+)/Cl(-) exchange transporter 7
ALGCVMYTM	W	L	9	2	0.8495	1	0	6M(15.9949), 9M(15.9949)		sp|P53351|PLK2_MOUSE	P53351	PLK2_MOUSE	Plk2	Serine/threonine-protein kinase PLK2
ALGDGDFIKCL	Q	H	11	2	0.8117	2	0			sp|Q8BH04|PCKGM_MOUSE	Q8BH04	PCKGM_MOUSE	Pck2	Phosphoenolpyruvate carboxykinase [GTP], mitochondrial
ALGKNSELL	R	V	9	2	0.9943	1	0			sp|Q8R3N1|NOP14_MOUSE	Q8R3N1	NOP14_MOUSE	Nop14	Nucleolar protein 14
ALGQNPTQAEV	R	L	11	2	0.9873	1	0			sp|P09542|MYL3_MOUSE	P09542	MYL3_MOUSE	Myl3	Myosin light chain 3
ALHQNITSI	V	S	9	2	0.9315	2	0			sp|Q9JHJ8|ICOSL_MOUSE	Q9JHJ8	ICOSL_MOUSE	Icoslg	IC
ALHVNGESL	S	E	9	2	0.9948	3	0			sp|Q5DW34|EHMT1_MOUSE	Q5DW34	EHMT1_MOUSE	Ehmt1	Histone-lysine N-methyltransferase EHMT1
ALIGVDHSL	L	Q	9	2	0.9908	1	0			sp|Q9QWV9|CCNT1_MOUSE	Q9QWV9	CCNT1_MOUSE	Ccnt1	Cyclin-T1
ALINADEL	K	A	8	2	0.9467	3	0			sp|P16546|SPTN1_MOUSE	P16546	SPTN1_MOUSE	Sptan1	Spectrin alpha chain, non-erythrocytic 1	Spta1	sp|P08032|SPTA1_MOUSE
ALINKDFL	V	S	8	2	0.9833	6	0			sp|Q8R115|TMM82_MOUSE	Q8R115	TMM82_MOUSE	Tmem82	Transmembrane protein 82
ALINSHVL	E	A	8	2	0.7874	1	0			sp|Q7TPH6|MYCB2_MOUSE	Q7TPH6	MYCB2_MOUSE	Mycbp2	E3 ubiquitin-protein ligase MYCBP2
ALIQNADTL	E	F	9	2	0.9952	12	0			sp|P55194|3BP1_MOUSE	P55194	3BP1_MOUSE	Sh3bp1	SH3 domain-binding protein 1
ALIQNPKEI	D	S	9	2	0.9965	3	0			sp|Q8R5K4|NOL6_MOUSE	Q8R5K4	NOL6_MOUSE	Nol6	Nucleolar protein 6
ALKNTDYF	G	S	8	2	0.989	2	0			sp|Q9D020|5NT3A_MOUSE	Q9D020	5NT3A_MOUSE	Nt5c3a	Cytosolic 5'-nucleotidase 3A
ALKVNTTLI	G	A	9	2	0.9546	2	0			sp|Q5DU56|NLRC3_MOUSE	Q5DU56	NLRC3_MOUSE	Nlrc3	Protein NLRC3
ALLAFTHL	R	S	8	2	0.983	1	0			sp|Q8BLX4|FUCT1_MOUSE	Q8BLX4	FUCT1_MOUSE	Slc35c1	GDP-fucose transporter 1
ALLELLHEL	A	Y	9	2	0.9956	2	0			sp|Q6DVA0|LEMD2_MOUSE	Q6DVA0	LEMD2_MOUSE	Lemd2	LEM domain-containing protein 2
ALLENMEGLFL	R	A	11	2	0.9928	2	0	6M(15.9949)		sp|P61924|COPZ1_MOUSE	P61924	COPZ1_MOUSE	Copz1	Coatomer subunit zeta-1
ALLENMTSV	V	S	9	2	0.9981	1	0	6M(15.9949)		sp|Q921B4|NRIF2_MOUSE	Q921B4	NRIF2_MOUSE	Nrif2	Neurotrophin receptor-interacting factor 2	Nrif1	sp|Q923B3|NRIF1_MOUSE
ALLEPARL	A	R	8	2	0.9773	4	0			sp|Q5SSH7|ZZEF1_MOUSE	Q5SSH7	ZZEF1_MOUSE	Zzef1	Zinc finger ZZ-type and EF-hand domain-containing protein 1
ALLFKNL	M	A	7	2	0.9278	6	0			sp|P16715|P4A_VACCW	P16715	P4A_VACCW	VACWR129	Major core protein 4a precursor
ALLNGEYL	L	L	8	2	0.9982	15	0			sp|Q4VBE8|WDR18_MOUSE	Q4VBE8	WDR18_MOUSE	Wdr18	WD repeat-containing protein 18
ALLNQQFL	A	C	8	2	0.9757	2	0			sp|P48455|PP2BC_MOUSE	P48455	PP2BC_MOUSE	Ppp3cc	Serine/threonine-protein phosphatase 2B catalytic subunit gamma isoform	Ppp3cb	sp|P48453|PP2BB_MOUSE
ALLNTDLV	A	A	8	2	0.9821	1	0			sp|Q91WM3|U3IP2_MOUSE	Q91WM3	U3IP2_MOUSE	Rrp9	U3 small nucleolar RNA-interacting protein 2
ALLPGVALL	L	L	9	2	0.9494	1	0			sp|P27773|PDIA3_MOUSE	P27773	PDIA3_MOUSE	Pdia3	Protein disulfide-isomerase A3
ALLQNKDVI	K	A	9	2	0.9976	7	0			sp|P51569|AGAL_MOUSE	P51569	AGAL_MOUSE	Gla	Alpha-galactosidase A
ALLQYINL	S	S	8	2	0.9741	5	0			sp|Q91W96|APC4_MOUSE	Q91W96	APC4_MOUSE	Anapc4	Anaphase-promoting complex subunit 4
ALLRNNTAL	A	Q	9	2	0.9624	2	0			sp|Q60875|ARHG2_MOUSE	Q60875	ARHG2_MOUSE	Arhgef2	Rho guanine nucleotide exchange factor 2
ALLSFTSL	A	F	8	2	0.9844	4	0			sp|Q9QZI9|SERC3_MOUSE	Q9QZI9	SERC3_MOUSE	Serinc3	Serine incorporator 3
ALMELRSTDAL	R	R	11	2	0.9998	2	0	3M(15.9949)		sp|G5E829|AT2B1_MOUSE	G5E829	AT2B1_MOUSE	Atp2b1	Plasma membrane calcium-transporting ATPase 1
ALMGNLRFLGL	F	Y	11	2	0.9964	5	0	3M(15.9949)		sp|Q9D2R8|RT33_MOUSE	Q9D2R8	RT33_MOUSE	Mrps33	28S ribosomal protein S33, mitochondrial
ALMRMLDNL	E	G	9	2	0.9622	1	0	3M(15.9949), 5M(15.9949)		sp|Q9QYC0|ADDA_MOUSE	Q9QYC0	ADDA_MOUSE	Add1	Alpha-adducin	Add2	sp|Q9QYB8|ADDB_MOUSE
ALNEKLVNL	I	-	9	2	0.8939	1	0			sp|Q9DCH4|EIF3F_MOUSE	Q9DCH4	EIF3F_MOUSE	Eif3f	Eukaryotic translation initiation factor 3 subunit F
ALPKAVVKLD	A	P	10	2	0.9978	7	0			sp|P08508|FCGR3_MOUSE	P08508	FCGR3_MOUSE	Fcgr3	Low affinity immunoglobulin gamma Fc region receptor III
ALPPGYSYTSL	P	P	11	2	0.9998	5	0			sp|Q80X50|UBP2L_MOUSE	Q80X50	UBP2L_MOUSE	Ubap2l	Ubiquitin-associated protein 2-like
ALPTNEFISFL	S	L	11	2	0.9985	30	0			sp|P23372|E8_VACCW	P23372	E8_VACCW	VACWR064	Protein E8
ALQNVDYF	E	V	8	2	0.8454	1	0			sp|Q5XF89|AT133_MOUSE	Q5XF89	AT133_MOUSE	Atp13a3	Polyamine-transporting ATPase 13A3
ALQNVKRL	S	L	8	2	0.9336	2	0			sp|P97390|VPS45_MOUSE	P97390	VPS45_MOUSE	Vps45	Vacuolar protein sorting-associated protein 45
ALQVFHNL	T	G	8	2	0.865	1	0			sp|Q8C0L8|COG5_MOUSE	Q8C0L8	COG5_MOUSE	Cog5	Conserved oligomeric Golgi complex subunit 5
ALQVSPSGYYL	C	D	11	2	0.7446	1	0			sp|Q6P9Q4|FHOD1_MOUSE	Q6P9Q4	FHOD1_MOUSE	Fhod1	FH1/FH2 domain-containing protein 1
ALRNQATM	I	V	8	2	0.9848	1	0	8M(15.9949)		sp|Q80UP3|DGKZ_MOUSE	Q80UP3	DGKZ_MOUSE	Dgkz	Diacylglycerol kinase zeta
ALSCVQTAL	P	L	9	2	0.7628	1	0			sp|Q5SSH7|ZZEF1_MOUSE	Q5SSH7	ZZEF1_MOUSE	Zzef1	Zinc finger ZZ-type and EF-hand domain-containing protein 1
ALTHHPAAM	A	S	9	2	0.9476	1	0	9M(15.9949)		sp|Q8K1L0|CREB5_MOUSE	Q8K1L0	CREB5_MOUSE	Creb5	Cyclic AMP-responsive element-binding protein 5
ALTNLTVL	D	S	8	2	0.9627	3	0			sp|Q3UM45|PP1R7_MOUSE	Q3UM45	PP1R7_MOUSE	Ppp1r7	Protein phosphatase 1 regulatory subunit 7
ALTSELANAR	K	D	10	2	0.912	1	0			sp|P26041|MOES_MOUSE	P26041	MOES_MOUSE	Msn	Moesin
ALVENSQVI	A	C	9	2	0.9082	2	0			sp|Q9D8X5|CNOT8_MOUSE	Q9D8X5	CNOT8_MOUSE	Cnot8	CCR4-NOT transcription complex subunit 8
ALVPHLNQL	L	C	9	2	0.9954	2	0			sp|P97467|AMD_MOUSE	P97467	AMD_MOUSE	Pam	Peptidyl-glycine alpha-amidating monooxygenase
ALVRFVNL	M	I	8	2	0.997	6	0			sp|A2BE28|LAS1L_MOUSE	A2BE28	LAS1L_MOUSE	Las1l	Ribosomal biogenesis protein LAS1L
ALVSNLYVI	S	S	9	2	0.9335	2	0			sp|P61620|S61A1_MOUSE	P61620	S61A1_MOUSE	Sec61a1	Protein transport protein Sec61 subunit alpha isoform 1	Sec61a2	sp|Q9JLR1|S61A2_MOUSE
ALYQFSNL	Q	L	8	2	0.9998	16	0			sp|B2RXS4|PLXB2_MOUSE	B2RXS4	PLXB2_MOUSE	Plxnb2	Plexin-B2
ALYYLSQL	T	S	8	2	0.9911	2	0			sp|Q921W4|QORL1_MOUSE	Q921W4	QORL1_MOUSE	Cryzl1	Quinone oxidoreductase-like protein 1
ALYYVHSL	E	L	8	2	0.9974	71	0			sp|P04318|MCES_VACCW	P04318	MCES_VACCW	VACWR117	mRNA-capping enzyme regulatory subunit
ALYYVHSLL	E	Y	9	2	0.9353	2	0			sp|P04318|MCES_VACCW	P04318	MCES_VACCW	VACWR117	mRNA-capping enzyme regulatory subunit
AMADTFLEHM	A	C	10	2, 3	1	58	0	10M(15.9949), 2M(15.9949)		sp|P52480|KPYM_MOUSE	P52480	KPYM_MOUSE	Pkm	Pyruvate kinase PKM
AMAEKVQHL	E	A	9	2	0.997	1	0	2M(15.9949)		sp|Q6ZWR6|SYNE1_MOUSE	Q6ZWR6	SYNE1_MOUSE	Syne1	Nesprin-1
AMAGSILNSYI	K	P	11	2	0.976	2	0	2M(15.9949)		sp|P50636|RN19A_MOUSE	P50636	RN19A_MOUSE	Rnf19a	E3 ubiquitin-protein ligase RNF19A
AMAPRTLLL	G	L	9	2	0.9988	29	0	2M(15.9949)		sp|P01899|HA11_MOUSE	P01899	HA11_MOUSE	H2-D1	H-2 class I histocompatibility antigen, D-B alpha chain	H2-L, H2-Q10	sp|P01897|HA1L_MOUSE, sp|P01898|HA10_MOUSE, sp|P01900|HA12_MOUSE
AMCECQAL	T	H	8	2	0.742	1	0	2M(15.9949)		sp|Q61189|ICLN_MOUSE	Q61189	ICLN_MOUSE	Clns1a	Methylosome subunit pICln
AMEFNHL	I	Y	7	2	0.9717	2	0	2M(15.9949)		sp|P22437|PGH1_MOUSE	P22437	PGH1_MOUSE	Ptgs1	Prostaglandin G/H synthase 1
AMENIKS	L	S	7	2	0.9616	3	0	2M(15.9949), 4N(0.9840)		sp|Q8VI51|SORC3_MOUSE	Q8VI51	SORC3_MOUSE	Sorcs3	VPS10 domain-containing receptor SorCS3
AMFDQSQIQEF	F	K	11	2	0.9999	7	0	2M(15.9949)		sp|Q3THE2|ML12B_MOUSE	Q3THE2	ML12B_MOUSE	Myl12b	Myosin regulatory light chain 12B	Myl9	sp|Q9CQ19|MYL9_MOUSE
AMFENFVSV	V	T	9	2	0.8828	2	0	2M(15.9949)		sp|Q3UYV9|NCBP1_MOUSE	Q3UYV9	NCBP1_MOUSE	Ncbp1	Nuclear cap-binding protein subunit 1
AMFGQPGAL	D	G	9	2	0.9974	2	0	2M(15.9949)		sp|Q91YT7|YTHD2_MOUSE	Q91YT7	YTHD2_MOUSE	Ythdf2	YTH domain-containing family protein 2
AMFNIRNI	P	G	8	2	0.9963	4	0	2M(15.9949)		sp|P97351|RS3A_MOUSE	P97351	RS3A_MOUSE	Rps3a	40S ribosomal protein S3a
AMGGFGVDYL	P	S	10	2	0.9871	2	0	2M(15.9949)		sp|Q5RJH6|SMG7_MOUSE	Q5RJH6	SMG7_MOUSE	Smg7	Nonsense-mediated mRNA decay factor SMG7
AMGINNRGAM	G	P	10	2	1	1	0	10M(15.9949), 2M(15.9949)		sp|Q99K48|NONO_MOUSE	Q99K48	NONO_MOUSE	Nono	Non-POU domain-containing octamer-binding protein
AMGTNDTVI	E	G	9	2	0.999	3	0	2M(15.9949)		sp|P19096|FAS_MOUSE	P19096	FAS_MOUSE	Fasn	Fatty acid synthase
AMGTQGNVM	A	G	9	2	0.9995	1	0	2M(15.9949), 9M(15.9949)		sp|Q8CFE4|SCYL2_MOUSE	Q8CFE4	SCYL2_MOUSE	Scyl2	SCY1-like protein 2
AMGTSTVEI	A	T	9	2	0.9948	3	0	2M(15.9949)		sp|Q3V1V3|ESF1_MOUSE	Q3V1V3	ESF1_MOUSE	Esf1	ESF1 homolog
AMGVNLTSM	L	S	9	2	1	198	0	2M(15.9949), 5N(0.9840), 9M(15.9949)		sp|P17918|PCNA_MOUSE	P17918	PCNA_MOUSE	Pcna	Proliferating cell nuclear antigen
AMGVNMETA	A	R	9	2	0.999	6	0	2M(15.9949), 6M(15.9949)		sp|P62814|VATB2_MOUSE	P62814	VATB2_MOUSE	Atp6v1b2	V-type proton ATPase subunit B, brain isoform	Atp6v1b1	sp|Q91YH6|VATB1_MOUSE
AMGVNMETARF	A	F	11	2	0.9905	2	0	2M(15.9949), 6M(15.9949)		sp|P62814|VATB2_MOUSE	P62814	VATB2_MOUSE	Atp6v1b2	V-type proton ATPase subunit B, brain isoform	Atp6v1b1	sp|Q91YH6|VATB1_MOUSE
AMGVNMETARFF	A	K	12	3	0.876	1	0	2M(15.9949), 6M(15.9949)		sp|P62814|VATB2_MOUSE	P62814	VATB2_MOUSE	Atp6v1b2	V-type proton ATPase subunit B, brain isoform	Atp6v1b1	sp|Q91YH6|VATB1_MOUSE
AMHRNLVDNI	E	T	10	2	0.9973	3	0	2M(15.9949)		sp|Q9QXS1|PLEC_MOUSE	Q9QXS1	PLEC_MOUSE	Plec	Plectin
AMHTNYLSA	V	C	9	2	0.9585	2	0	2M(15.9949)		sp|P62881|GNB5_MOUSE	P62881	GNB5_MOUSE	Gnb5	Guanine nucleotide-binding protein subunit beta-5
AMIDPDGTLEAL	N	N	12	2	0.9962	3	0	2M(15.9949)		sp|Q6A065|CE170_MOUSE	Q6A065	CE170_MOUSE	Cep170	Centrosomal protein of 170 kDa
AMIELVERL	A	K	9	2	0.9999	17	0	2M(15.9949)		sp|Q9QXA7|TRI44_MOUSE	Q9QXA7	TRI44_MOUSE	Trim44	Tripartite motif-containing protein 44
AMIGGFAGRI	S	G	10	2	0.9342	1	0	2M(15.9949)		sp|Q8C854|MYEF2_MOUSE	Q8C854	MYEF2_MOUSE	Myef2	Myelin expression factor 2
AMIKGLQVL	I	M	9	2	0.9296	1	0	2M(15.9949)		sp|Q7TMB8|CYFP1_MOUSE	Q7TMB8	CYFP1_MOUSE	Cyfip1	Cytoplasmic FMR1-interacting protein 1	Cyfip2	sp|Q5SQX6|CYFP2_MOUSE
AMKNVTEL	A	N	8	2	0.9814	2	0	2M(15.9949)		sp|P61982|1433G_MOUSE	P61982	1433G_MOUSE	Ywhag	14-3-3 protein gamma
AMLAVLHTV	E	L	9	2	0.9957	2	0	2M(15.9949)		sp|Q9D8Z6|ATGA1_MOUSE	Q9D8Z6	ATGA1_MOUSE	Atg101	Autophagy-related protein 101
AMLENASDI	Q	K	9	2	0.9984	3	0	2M(15.9949)		sp|Q6P542|ABCF1_MOUSE	Q6P542	ABCF1_MOUSE	Abcf1	ATP-binding cassette sub-family F member 1
AMLENLLSM	P	E	9	2	0.9172	1	0	2M(15.9949), 9M(15.9949)		sp|Q3V300|KIF22_MOUSE	Q3V300	KIF22_MOUSE	Kif22	Kinesin-like protein KIF22
AMLENQTPEL	D	F	10	2	0.981	1	0	2M(15.9949)		sp|P19096|FAS_MOUSE	P19096	FAS_MOUSE	Fasn	Fatty acid synthase
AMLHNIDQEML	P	K	11	2	0.9231	2	0	10M(15.9949), 2M(15.9949)		sp|O88543|CSN3_MOUSE	O88543	CSN3_MOUSE	Cops3	COP9 signalosome complex subunit 3
AMLISAGLPPL	N	K	11	2	0.9898	1	0	2M(15.9949)		sp|O35286|DHX15_MOUSE	O35286	DHX15_MOUSE	Dhx15	ATP-dependent RNA helicase DHX15
AMLQLKTDL	L	L	9	2	0.9892	1	0	2M(15.9949)		sp|Q4FZC9|SYNE3_MOUSE	Q4FZC9	SYNE3_MOUSE	Syne3	Nesprin-3
AMLRLIPSL	R	R	9	2	0.9974	1	0	2M(15.9949)		sp|Q9JHU4|DYHC1_MOUSE	Q9JHU4	DYHC1_MOUSE	Dync1h1	Cytoplasmic dynein 1 heavy chain 1
AMLSLLPETL	R	V	10	2	0.9989	2	0	2M(15.9949)		sp|Q9QY53|NPHP1_MOUSE	Q9QY53	NPHP1_MOUSE	Nphp1	Nephrocystin-1
AMLTILHEI	I	R	9	2	0.9999	10	0	2M(15.9949)		sp|E9PZJ8|ASCC3_MOUSE	E9PZJ8	ASCC3_MOUSE	Ascc3	Activating signal cointegrator 1 complex subunit 3
AMLTNLESL	Q	S	9	2	0.9987	27	0	2M(15.9949)		sp|Q8BZQ7|ANC2_MOUSE	Q8BZQ7	ANC2_MOUSE	Anapc2	Anaphase-promoting complex subunit 2
AMLVHGQDAI	D	T	10	2	0.9986	2	0	2M(15.9949)		sp|Q8C7X2|EMC1_MOUSE	Q8C7X2	EMC1_MOUSE	Emc1	ER membrane protein complex subunit 1
AMMAKAEYL	D	C	9	2	1	26	0	2M(15.9949), 3M(15.9949)		sp|Q99JI4|PSMD6_MOUSE	Q99JI4	PSMD6_MOUSE	Psmd6	26S proteasome non-ATPase regulatory subunit 6
AMMSNNDLV	N	R	9	2	0.9781	1	0	2M(15.9949), 3M(15.9949)		sp|P49813|TMOD1_MOUSE	P49813	TMOD1_MOUSE	Tmod1	Tropomodulin-1
AMMYHTITL	G	T	9	2	0.8804	1	0	2M(15.9949), 3M(15.9949)		sp|P56546|CTBP2_MOUSE	P56546	CTBP2_MOUSE	Ctbp2	C-terminal-binding protein 2
AMNINGGNTL	C	A	10	2	0.9992	3	0	2M(15.9949)		sp|Q9CQA3|SDHB_MOUSE	Q9CQA3	SDHB_MOUSE	Sdhb	Succinate dehydrogenase [ubiquinone] iron-sulfur subunit, mitochondrial
AMNRMIDEL	E	N	9	2	0.9837	3	0	2M(15.9949), 5M(15.9949)		sp|Q9EP71|RAI14_MOUSE	Q9EP71	RAI14_MOUSE	Rai14	Ankycorbin
AMNVNDLFL	T	A	9	2	0.9985	9	0	2M(15.9949)		sp|P61021|RAB5B_MOUSE	P61021	RAB5B_MOUSE	Rab5b	Ras-related protein Rab-5B
AMNVNEIFM	T	A	9	2	0.9999	27	0	2M(15.9949), 9M(15.9949)		sp|P35278|RAB5C_MOUSE	P35278	RAB5C_MOUSE	Rab5c	Ras-related protein Rab-5C
AMPAGYMGGM	M	Q	10	2	0.9996	2	0	10M(15.9949), 2M(15.9949), 7M(15.9949)		sp|Q7TN29|SMAP2_MOUSE	Q7TN29	SMAP2_MOUSE	Smap2	Stromal membrane-associated protein 2
AMPINKATI	D	M	9	2	0.9997	7	0	2M(15.9949)		sp|O88967|YMEL1_MOUSE	O88967	YMEL1_MOUSE	Yme1l1	ATP-dependent zinc metalloprotease YME1L1
AMPSNSPVAA	K	L	10	2	0.9998	8	0	2M(15.9949)		sp|Q9QY76|VAPB_MOUSE	Q9QY76	VAPB_MOUSE	Vapb	Vesicle-associated membrane protein-associated protein B
AMPSNSPVAAL	K	A	11	2	0.9999	1	0	2M(15.9949)		sp|Q9QY76|VAPB_MOUSE	Q9QY76	VAPB_MOUSE	Vapb	Vesicle-associated membrane protein-associated protein B
AMPTADAGSTL	A	P	11	2	0.9838	2	0	2M(15.9949)		sp|Q9DBR0|AKAP8_MOUSE	Q9DBR0	AKAP8_MOUSE	Akap8	A-kinase anchor protein 8
AMQEFLTRL	Q	Q	9	2	0.9999	2	0	2M(15.9949)		sp|O88738|BIRC6_MOUSE	O88738	BIRC6_MOUSE	Birc6	Baculoviral IAP repeat-containing protein 6
AMSENIWSTL	G	R	10	2	0.889	2	0	2M(15.9949)		sp|O09012|PEX5_MOUSE	O09012	PEX5_MOUSE	Pex5	Peroxisomal targeting signal 1 receptor
AMSQLAEL	Q	P	8	2	0.7794	1	0	2M(15.9949), 4Q(0.9840)		sp|Q3UCV8|OTUL_MOUSE	Q3UCV8	OTUL_MOUSE	Otulin	Ubiquitin thioesterase otulin
AMSSKFFLM	G	A	9	2	0.9613	1	0	2M(15.9949), 9M(15.9949)		sp|P22725|WNT5A_MOUSE	P22725	WNT5A_MOUSE	Wnt5a	Protein Wnt-5a
AMSTNSVSV	V	A	9	2	0.9386	2	0	2M(15.9949)		sp|Q80V63|PRDM4_MOUSE	Q80V63	PRDM4_MOUSE	Prdm4	PR domain zinc finger protein 4
AMTVLPKL	D	A	8	2	0.9999	3	0	2M(15.9949)		sp|Q76LS9|MINY1_MOUSE	Q76LS9	MINY1_MOUSE	Mindy1	Ubiquitin carboxyl-terminal hydrolase MINDY-1
AMVEFVKL	D	L	8	2	0.9988	4	0	2M(15.9949)		sp|Q8BMP6|GCP60_MOUSE	Q8BMP6	GCP60_MOUSE	Acbd3	Golgi resident protein GCP60
AMVEFYTM	A	S	8	2	0.9676	2	0	2M(15.9949), 8M(15.9949)		sp|Q9JHU4|DYHC1_MOUSE	Q9JHU4	DYHC1_MOUSE	Dync1h1	Cytoplasmic dynein 1 heavy chain 1
AMVINIYRM	V	S	9	2	0.9862	1	0	2M(15.9949), 9M(15.9949)		sp|O35245|PKD2_MOUSE	O35245	PKD2_MOUSE	Pkd2	Polycystin-2
AMVQHPQPTPM	N	Y	11	2	0.9987	4	0	11M(15.9949), 2M(15.9949)		sp|O09000|NCOA3_MOUSE	O09000	NCOA3_MOUSE	Ncoa3	Nuclear receptor coactivator 3
AMVVVGDLHPL	K	R	11	2	0.9974	1	0	2M(15.9949)		sp|P58468|SLX9_MOUSE	P58468	SLX9_MOUSE	Slx9	Ribosome biogenesis protein SLX9 homolog
AMWANEQAL	W	A	9	2	0.9992	7	0	2M(15.9949)		sp|Q61462|CY24A_MOUSE	Q61462	CY24A_MOUSE	Cyba	Cytochrome b-245 light chain
AMYAFPRI	G	L	8	2	0.9817	1	0	2M(15.9949)		sp|Q8BGT5|ALAT2_MOUSE	Q8BGT5	ALAT2_MOUSE	Gpt2	Alanine aminotransferase 2
AMYELVRV	A	G	8	2	0.9997	17	0	2M(15.9949)		sp|P50516|VATA_MOUSE	P50516	VATA_MOUSE	Atp6v1a	V-type proton ATPase catalytic subunit A
AMYGTKLETI	D	R	10	2	1	3	0	2M(15.9949)		sp|O70589|CSKP_MOUSE	O70589	CSKP_MOUSE	Cask	Peripheral plasma membrane protein CASK
AMYIFLHTV	L	K	9	2	1	62	0	2M(15.9949)		sp|Q9CQZ0|ORML2_MOUSE	Q9CQZ0	ORML2_MOUSE	Ormdl2	ORM1-like protein 2
AMYPNGMLPP	A	-	10	2	0.9998	28	0	2M(15.9949), 7M(15.9949)		sp|P0CG14|DERPC_MOUSE	P0CG14	DERPC_MOUSE	Derpc	Decreased expression in renal and prostate cancer protein
AMYSFINAL	A	A	9	2	0.9994	11	0	2M(15.9949)		sp|E9PV87|TALD3_MOUSE	E9PV87	TALD3_MOUSE	Talpid3	Protein TALPID3
AMYVHAYTL	V	Y	9	2	1	35	0	2M(15.9949)		sp|O70435|PSA3_MOUSE	O70435	PSA3_MOUSE	Psma3	Proteasome subunit alpha type-3
ANFAHFDNF	N	P	9	2	0.997	5	0			sp|Q8K2K6|AGFG1_MOUSE	Q8K2K6	AGFG1_MOUSE	Agfg1	Arf-GAP domain and FG repeat-containing protein 1
ANFPRATGL	P	Q	9	2	0.9997	11	0			sp|P0CG14|DERPC_MOUSE	P0CG14	DERPC_MOUSE	Derpc	Decreased expression in renal and prostate cancer protein
ANFQAARL	R	A	8	2	0.9884	1	0			sp|Q3ZK22|VEZA_MOUSE	Q3ZK22	VEZA_MOUSE	Vezt	Vezatin
ANFSFFTSL	I	M	9	2	0.9999	13	0			sp|Q91W52|TMM19_MOUSE	Q91W52	TMM19_MOUSE	Tmem19	Transmembrane protein 19
ANFTFPRL	F	P	8	2	0.9998	18	0			sp|Q3UHD6|SNX27_MOUSE	Q3UHD6	SNX27_MOUSE	Snx27	Sorting nexin-27
ANHEYFAL	L	Q	8	2	0.8425	1	0			sp|Q8BPU7|ELMO1_MOUSE	Q8BPU7	ELMO1_MOUSE	Elmo1	Engulfment and cell motility protein 1
ANHRYANV	A	F	8	2	0.7412	1	0			sp|Q8R3B7|BRD8_MOUSE	Q8R3B7	BRD8_MOUSE	Brd8	Bromodomain-containing protein 8
ANIGFSTL	P	T	8	2	0.9765	2	0			sp|Q68FD5|CLH1_MOUSE	Q68FD5	CLH1_MOUSE	Cltc	Clathrin heavy chain 1
ANINFPNL	Y	K	8	2	0.9991	9	0			sp|Q6PDK2|KMT2D_MOUSE	Q6PDK2	KMT2D_MOUSE	Kmt2d	Histone-lysine N-methyltransferase 2D
ANIQAVSL	R	K	8	2	0.9415	1	0			sp|Q9DB34|CHM2A_MOUSE	Q9DB34	CHM2A_MOUSE	Chmp2a	Charged multivesicular body protein 2a
ANIRNMSVI	K	A	9	2	0.9934	3	0	6M(15.9949)		sp|P58252|EF2_MOUSE	P58252	EF2_MOUSE	Eef2	Elongation factor 2
ANLFNKYPAL	V	T	10	2	0.9936	3	0			sp|Q99K51|PLST_MOUSE	Q99K51	PLST_MOUSE	Pls3	Plastin-3	Lcp1	sp|Q61233|PLSL_MOUSE
ANLIYYSL	L	K	8	2	0.9949	2	0			sp|Q91VR2|ATPG_MOUSE	Q91VR2	ATPG_MOUSE	Atp5f1c	ATP synthase subunit gamma, mitochondrial
ANLKFMTSM	K	R	9	2	1	13	0	6M(15.9949), 9M(15.9949)		sp|Q8C6B9|AROS_MOUSE	Q8C6B9	AROS_MOUSE	Rps19bp1	Active regulator of SIRT1
ANLKYLSL	S	G	8	2	0.9989	3	0			sp|Q8R1T4|S35A3_MOUSE	Q8R1T4	S35A3_MOUSE	Slc35a3	UDP-N-acetylglucosamine transporter
ANLNYGSL	Q	K	8	2	0.9936	1	0			sp|A6H8H2|DEN4C_MOUSE	A6H8H2	DEN4C_MOUSE	Dennd4c	DENN domain-containing protein 4C
ANLSVLNL	D	V	8	2	0.9785	3	0			sp|P62754|RS6_MOUSE	P62754	RS6_MOUSE	Rps6	40S ribosomal protein S6
ANLSYQSL	T	V	8	2	0.9963	1	0			sp|Q9D8Y1|T126A_MOUSE	Q9D8Y1	T126A_MOUSE	Tmem126a	Transmembrane protein 126A
ANRYFTTV	V	C	8	2	0.9902	1	0			sp|Q6PAR5|GAPD1_MOUSE	Q6PAR5	GAPD1_MOUSE	Gapvd1	GTPase-activating protein and VPS9 domain-containing protein 1
ANTTNLTFL	F	D	9	2	0.9981	4	0			sp|Q9QUK6|TLR4_MOUSE	Q9QUK6	TLR4_MOUSE	Tlr4	Toll-like receptor 4
ANVELSSL	M	A	8	2	0.8144	1	0			sp|P97822|AN32E_MOUSE	P97822	AN32E_MOUSE	Anp32e	Acidic leucine-rich nuclear phosphoprotein 32 family member E
ANVFSDLH	E	S	8	2	0.931	2	0			sp|Q587J6|LITD1_MOUSE	Q587J6	LITD1_MOUSE	L1td1	LINE-1 type transposase domain-containing protein 1
ANVPFITV	E	N	8	2	0.962	2	0			sp|Q920A7|AFG31_MOUSE	Q920A7	AFG31_MOUSE	Afg3l1	AFG3-like protein 1	Afg3l2	sp|Q8JZQ2|AFG32_MOUSE
ANVQHVLHL	V	M	9	2	0.9742	1	0			sp|Q8CEE0|CEP57_MOUSE	Q8CEE0	CEP57_MOUSE	Cep57	Centrosomal protein of 57 kDa
ANVQYAAV	E	R	8	2	0.9677	1	0			sp|Q6PB44|PTN23_MOUSE	Q6PB44	PTN23_MOUSE	Ptpn23	Tyrosine-protein phosphatase non-receptor type 23
ANVRNFGRSLL	K	A	11	3	0.9675	1	0			sp|Q80TD3|FNIP2_MOUSE	Q80TD3	FNIP2_MOUSE	Fnip2	Folliculin-interacting protein 2
ANVSNFTFA	G	P	9	2	0.9994	4	0			sp|Q9DBG6|RPN2_MOUSE	Q9DBG6	RPN2_MOUSE	Rpn2	Dolichyl-diphosphooligosaccharide--protein glycosyltransferase subunit 2
ANVVFTQL	M	L	8	2	0.9982	16	0			sp|Q8VHH5|AGAP3_MOUSE	Q8VHH5	AGAP3_MOUSE	Agap3	Arf-GAP with GTPase, ANK repeat and PH domain-containing protein 3
ANYAGQFNQDYL	V	S	12	2	1	13	0			sp|P97384|ANX11_MOUSE	P97384	ANX11_MOUSE	Anxa11	Annexin A11
ANYDFYQL	A	L	8	2	0.9973	9	0			sp|Q8VE18|SMG8_MOUSE	Q8VE18	SMG8_MOUSE	Smg8	Nonsense-mediated mRNA decay factor SMG8
ANYDFYQLL	A	E	9	2	0.9937	1	0			sp|Q8VE18|SMG8_MOUSE	Q8VE18	SMG8_MOUSE	Smg8	Nonsense-mediated mRNA decay factor SMG8
ANYERGNME	K	L	9	2	0.9098	1	0			sp|Q9Z0R6|ITSN2_MOUSE	Q9Z0R6	ITSN2_MOUSE	Itsn2	Intersectin-2
ANYEYYVQGQM	K	-	11	2	0.9491	1	0	11M(15.9949)		sp|Q8R0G9|NU133_MOUSE	Q8R0G9	NU133_MOUSE	Nup133	Nuclear pore complex protein Nup133
ANYNFRGM	R	Y	8	2	0.9998	4	0	8M(15.9949)		sp|Q8CJ67|STAU2_MOUSE	Q8CJ67	STAU2_MOUSE	Stau2	Double-stranded RNA-binding protein Staufen homolog 2
ANYQRDGPM	V	C	9	2	1	9	0	9M(15.9949)		sp|P24270|CATA_MOUSE	P24270	CATA_MOUSE	Cat	Catalase
ANYTNGSF	A	G	8	2	0.9892	3	0			sp|Q61656|DDX5_MOUSE	Q61656	DDX5_MOUSE	Ddx5	Probable ATP-dependent RNA helicase DDX5
ANYTNGSFGSNF	A	V	12	2	1	6	0			sp|Q61656|DDX5_MOUSE	Q61656	DDX5_MOUSE	Ddx5	Probable ATP-dependent RNA helicase DDX5
ANYVFLYHL	L	H	9	2	0.9924	1	0			sp|Q8K0H1|S47A1_MOUSE	Q8K0H1	S47A1_MOUSE	Slc47a1	Multidrug and toxin extrusion protein 1
APAAHTHI	V	Q	8	2	0.9997	2	0			sp|Q80TZ9|RERE_MOUSE	Q80TZ9	RERE_MOUSE	Rere	Arginine-glutamic acid dipeptide repeats protein
APDLGQVTL	L	S	9	2	0.9652	5	0			sp|O88783|FA5_MOUSE	O88783	FA5_MOUSE	F5	Coagulation factor V
APDNRETL	K	G	8	2	0.9989	4	0			sp|Q3TDQ1|STT3B_MOUSE	Q3TDQ1	STT3B_MOUSE	Stt3b	Dolichyl-diphosphooligosaccharide--protein glycosyltransferase subunit STT3B
APFDSVFYL	S	D	9	2	0.8687	1	0			sp|P04195|CAHH_VACCW	P04195	CAHH_VACCW	VACWR113	Cell surface-binding protein
APGFGDNR	K	K	8	2	0.8282	1	0			sp|P63038|CH60_MOUSE	P63038	CH60_MOUSE	Hspd1	60 kDa heat shock protein, mitochondrial
APGSKDHL	A	N	8	2	0.9355	1	0			sp|Q8K1A5|TM41B_MOUSE	Q8K1A5	TM41B_MOUSE	Tmem41b	Transmembrane protein 41B
APGSPTNLEFI	G	N	11	2	0.9994	35	0			sp|P07612|L1_VACCW	P07612	L1_VACCW	VACWR088	Protein L1
APHHLFL	V	N	7	2	0.8686	1	0			sp|B2RQC6|PYR1_MOUSE	B2RQC6	PYR1_MOUSE	Cad	CAD protein
APIIAVTR	R	N	8	2	0.9642	2	0			sp|P52480|KPYM_MOUSE	P52480	KPYM_MOUSE	Pkm	Pyruvate kinase PKM
APMNVDNLI	S	M	9	2	0.8758	1	0	3M(15.9949)		sp|P24358|F5_VACCW	P24358	F5_VACCW	VACWR044	36 kDa major membrane protein F5
APMNVDNLIMI	S	V	11	2	0.9828	4	0	10M(15.9949), 3M(15.9949)		sp|P24358|F5_VACCW	P24358	F5_VACCW	VACWR044	36 kDa major membrane protein F5
APMNVDNLIMIV	S	L	12	2	0.9596	2	0	3M(15.9949)		sp|P24358|F5_VACCW	P24358	F5_VACCW	VACWR044	36 kDa major membrane protein F5
APPAYSEL	D	Y	8	2	0.9627	1	0			sp|Q9DCP9|DAZP2_MOUSE	Q9DCP9	DAZP2_MOUSE	Dazap2	DAZ-associated protein 2
APQNLSTF	M	C	8	2	0.895	1	0			sp|Q99KV1|DJB11_MOUSE	Q99KV1	DJB11_MOUSE	Dnajb11	DnaJ homolog subfamily B member 11
APRPPPKPM	A	-	9	2	0.9626	9	0	9M(15.9949)		sp|P62855|RS26_MOUSE	P62855	RS26_MOUSE	Rps26	40S ribosomal protein S26
APRSGLSL	I	K	8	2	0.8828	1	0			sp|P17374|DUT_VACCW	P17374	DUT_VACCW	DUT	Deoxyuridine 5'-triphosphate nucleotidohydrolase
APSSNVASV	I	C	9	2	0.8276	3	0			sp|P83741|WNK1_MOUSE	P83741	WNK1_MOUSE	Wnk1	Serine/threonine-protein kinase WNK1
APVKNLTQI	V	G	9	2	0.9939	3	0			sp|G5E8Z2|TAF4B_MOUSE	G5E8Z2	TAF4B_MOUSE	Taf4b	Transcription initiation factor TFIID subunit 4B
AQAENLQAL	L	F	9	2	0.9354	1	0			sp|Q9JLN9|MTOR_MOUSE	Q9JLN9	MTOR_MOUSE	Mtor	Serine/threonine-protein kinase mTOR
AQATGKPAQYI	L	A	11	2	0.9959	2	0			sp|P34884|MIF_MOUSE	P34884	MIF_MOUSE	Mif	Macrophage migration inhibitory factor
AQATYSGL	A	E	8	2	0.9962	1	0			sp|Q9Z2X1|HNRPF_MOUSE	Q9Z2X1	HNRPF_MOUSE	Hnrnpf	Heterogeneous nuclear ribonucleoprotein F
AQDINQENL	I	Q	9	2	0.9898	1	0			sp|Q9QYF9|NDRG3_MOUSE	Q9QYF9	NDRG3_MOUSE	Ndrg3	Protein NDRG3
AQDYDQYI	Y	S	8	2	0.959	22	0	2Q(0.9840)		sp|P06440|P4B_VACCW	P06440	P4B_VACCW	VACWR122	Major core protein 4b
AQFAARAIISEL	L	V	12	2	0.9703	2	0			sp|Q62448|IF4G2_MOUSE	Q62448	IF4G2_MOUSE	Eif4g2	Eukaryotic translation initiation factor 4 gamma 2
AQFEHTIL	T	L	8	2	0.9952	10	0			sp|O08663|MAP2_MOUSE	O08663	MAP2_MOUSE	Metap2	Methionine aminopeptidase 2
AQFGKSIDVI	V	E	10	2	0.992	1	0			sp|Q99MD9|NASP_MOUSE	Q99MD9	NASP_MOUSE	Nasp	Nuclear autoantigenic sperm protein
AQFKFTVL	V	L	8	2	0.9999	28	0			sp|P50580|PA2G4_MOUSE	P50580	PA2G4_MOUSE	Pa2g4	Proliferation-associated protein 2G4
AQFNFQNV	D	D	8	2	0.9964	2	0			sp|Q91YI6|GLD2_MOUSE	Q91YI6	GLD2_MOUSE	Tent2	Poly(A) RNA polymerase GLD2
AQFNFQNVDL	D	S	10	2	0.9996	2	0			sp|Q91YI6|GLD2_MOUSE	Q91YI6	GLD2_MOUSE	Tent2	Poly(A) RNA polymerase GLD2
AQFVAETHI	Q	V	9	2	0.9883	1	0			sp|Q9CQY5|MAGT1_MOUSE	Q9CQY5	MAGT1_MOUSE	Magt1	Magnesium transporter protein 1
AQFYGLTPL	E	V	9	2	0.9943	2	0			sp|Q6P7W2|SHKB1_MOUSE	Q6P7W2	SHKB1_MOUSE	Shkbp1	SH3KBP1-binding protein 1
AQGINVNLV	I	T	9	2	0.9997	9	0			sp|Q9CQ31|ASB11_MOUSE	Q9CQ31	ASB11_MOUSE	Asb11	Ankyrin repeat and SOCS box protein 11
AQGPGLKEAF	H	T	10	2	0.9891	2	0			sp|Q80X90|FLNB_MOUSE	Q80X90	FLNB_MOUSE	Flnb	Filamin-B
AQGPRIDVV	G	L	9	2	0.7477	1	0			sp|Q8CEE6|PASK_MOUSE	Q8CEE6	PASK_MOUSE	Pask	PAS domain-containing serine/threonine-protein kinase
AQGTTRETI	N	S	9	2	0.9916	5	0			sp|P18572|BASI_MOUSE	P18572	BASI_MOUSE	Bsg	Basigin
AQGVNMNRL	S	P	9	2	0.8484	1	0	6M(15.9949)		sp|P69566|RANB9_MOUSE	P69566	RANB9_MOUSE	Ranbp9	Ran-binding protein 9	Ranbp10	sp|Q6VN19|RBP10_MOUSE
AQGVSIEAM	F	N	9	2	0.99	3	0	9M(15.9949)		sp|Q8BHA0|IN80C_MOUSE	Q8BHA0	IN80C_MOUSE	Ino80c	INO80 complex subunit C
AQHVNLAVL	L	E	9	2	0.9702	2	0			sp|Q9DB00|GON4L_MOUSE	Q9DB00	GON4L_MOUSE	Gon4l	GON-4-like protein
AQIDHYLGL	Q	A	9	2	0.9992	8	0			sp|Q99P72|RTN4_MOUSE	Q99P72	RTN4_MOUSE	Rtn4	Reticulon-4
AQILNQVMM	S	T	9	2	0.9998	8	0	8M(15.9949), 9M(15.9949)		sp|O08901|BUB1_MOUSE	O08901	BUB1_MOUSE	Bub1	Mitotic checkpoint serine/threonine-protein kinase BUB1
AQIPKLMSNM	Q	R	10	2	0.8777	1	0	10M(15.9949), 7M(15.9949)		sp|Q9DBR1|XRN2_MOUSE	Q9DBR1	XRN2_MOUSE	Xrn2	5'-3' exoribonuclease 2
AQIQNITTSPM	E	F	11	2	0.9886	2	0	11M(15.9949)		sp|Q3TIR1|TPC13_MOUSE	Q3TIR1	TPC13_MOUSE	Trappc13	Trafficking protein particle complex subunit 13
AQIRFSNI	P	S	8	2	0.999	3	0			sp|P80315|TCPD_MOUSE	P80315	TCPD_MOUSE	Cct4	T-complex protein 1 subunit delta
AQIRYEGI	K	L	8	2	0.7835	1	0			sp|Q8CGC4|LS14B_MOUSE	Q8CGC4	LS14B_MOUSE	Lsm14b	Protein LSM14 homolog B
AQISNGQQL	I	M	9	2	0.9984	3	0			sp|E9Q5G3|KIF23_MOUSE	E9Q5G3	KIF23_MOUSE	Kif23	Kinesin-like protein KIF23
AQITGTEHL	L	T	9	2	0.9992	6	0			sp|Q8CI51|PDLI5_MOUSE	Q8CI51	PDLI5_MOUSE	Pdlim5	PDZ and LIM domain protein 5
AQIVNPVRV	V	K	9	2	0.9863	1	0			sp|Q0VDN7|RUND1_MOUSE	Q0VDN7	RUND1_MOUSE	Rundc1	RUN domain-containing protein 1
AQLAKKDYL	V	G	9	2	0.9983	5	0			sp|O70145|NCF2_MOUSE	O70145	NCF2_MOUSE	Ncf2	Neutrophil cytosol factor 2
AQLANTTAI	Q	Q	9	2	0.9931	4	0			sp|Q9R1C7|PR40A_MOUSE	Q9R1C7	PR40A_MOUSE	Prpf40a	Pre-mRNA-processing factor 40 homolog A
AQLDNEKTNFM	N	Y	11	2	0.9979	1	0	11M(15.9949)		sp|Q3UZ39|LRRF1_MOUSE	Q3UZ39	LRRF1_MOUSE	Lrrfip1	Leucine-rich repeat flightless-interacting protein 1
AQLDNIHVL	L	Q	9	2	0.9981	2	0			sp|P58196|PLS4_MOUSE	P58196	PLS4_MOUSE	Plscr4	Phospholipid scramblase 4
AQLDNLQEL	I	C	9	2	0.9842	1	0			sp|Q8R502|LRC8C_MOUSE	Q8R502	LRC8C_MOUSE	Lrrc8c	Volume-regulated anion channel subunit LRRC8C
AQLELISRL	L	C	9	2	0.9992	8	0			sp|Q14AX6|CDK12_MOUSE	Q14AX6	CDK12_MOUSE	Cdk12	Cyclin-dependent kinase 12
AQLENAAKV	I	L	9	2	0.8967	1	0			sp|Q9ESJ0|XPO4_MOUSE	Q9ESJ0	XPO4_MOUSE	Xpo4	Exportin-4
AQLEYKLV	V	A	8	2	0.9863	1	0			sp|Q8BHG1|NRDC_MOUSE	Q8BHG1	NRDC_MOUSE	Nrdc	Nardilysin
AQLIYRHL	E	L	8	2	0.9556	1	0			sp|Q6PFQ7|RASL2_MOUSE	Q6PFQ7	RASL2_MOUSE	Rasa4	Ras GTPase-activating protein 4
AQLLFSNV	S	N	8	2	0.9546	1	0			sp|Q61735|CD47_MOUSE	Q61735	CD47_MOUSE	Cd47	Leukocyte surface antigen CD47
AQLLHVHEI	C	F	9	2	0.9986	2	0			sp|Q8CB19|PHTF2_MOUSE	Q8CB19	PHTF2_MOUSE	Phtf2	Protein PHTF2
AQLPLADFV	H	K	9	2	0.9552	1	0			sp|Q8C1Z8|TM10A_MOUSE	Q8C1Z8	TM10A_MOUSE	Trmt10a	tRNA methyltransferase 10 homolog A
AQLPLSNSL	A	Q	9	2	0.9366	1	0			sp|Q8BWM0|PGES2_MOUSE	Q8BWM0	PGES2_MOUSE	Ptges2	Prostaglandin E synthase 2
AQLPMIYFL	C	N	9	2	0.9891	2	0	5M(15.9949)		sp|Q8VCW4|UN93B_MOUSE	Q8VCW4	UN93B_MOUSE	Unc93b1	Protein unc-93 homolog B1
AQLPNDVVL	A	Q	9	2	0.9914	1	0			sp|O54916|REPS1_MOUSE	O54916	REPS1_MOUSE	Reps1	RalBP1-associated Eps domain-containing protein 1
AQLQDLKNQHL	M	A	11	3	0.9887	3	0			sp|Q9CU62|SMC1A_MOUSE	Q9CU62	SMC1A_MOUSE	Smc1a	Structural maintenance of chromosomes protein 1A
AQLQNQQSF	G	G	9	2	0.9995	7	0			sp|Q9D1L0|CHCH2_MOUSE	Q9D1L0	CHCH2_MOUSE	Chchd2	Coiled-coil-helix-coiled-coil-helix domain-containing protein 2
AQLRNLDNA	L	V	9	2	0.9932	3	0			sp|Q80VY9|DHX33_MOUSE	Q80VY9	DHX33_MOUSE	Dhx33	ATP-dependent RNA helicase DHX33
AQLSHIEHM	L	F	9	2	0.9999	1	0	9M(15.9949)		sp|Q3UMB5|SMCR8_MOUSE	Q3UMB5	SMCR8_MOUSE	Smcr8	Guanine nucleotide exchange protein SMCR8
AQLSLIASL	P	L	9	2	0.9592	3	0			sp|P35456|UPAR_MOUSE	P35456	UPAR_MOUSE	Plaur	Urokinase plasminogen activator surface receptor
AQLTYHGL	A	C	8	2	0.9965	5	0			sp|Q76LS9|MINY1_MOUSE	Q76LS9	MINY1_MOUSE	Mindy1	Ubiquitin carboxyl-terminal hydrolase MINDY-1
AQLVNLREL	V	H	9	2	0.9907	1	0			sp|Q5DU41|LRC8B_MOUSE	Q5DU41	LRC8B_MOUSE	Lrrc8b	Volume-regulated anion channel subunit LRRC8B
AQMAMLQFI	T	S	9	2	0.9949	1	0	3M(15.9949), 5M(15.9949)		sp|Q99KI0|ACON_MOUSE	Q99KI0	ACON_MOUSE	Aco2	Aconitate hydratase, mitochondrial
AQMQNHSLEM	K	T	10	2	0.9999	1	0	10M(15.9949), 3M(15.9949)		sp|Q9JJ11|TACC3_MOUSE	Q9JJ11	TACC3_MOUSE	Tacc3	Transforming acidic coiled-coil-containing protein 3
AQMTPNPSEM	Q	F	10	2	0.9998	2	0	10M(15.9949), 3M(15.9949)		sp|Q9DD02|HIKES_MOUSE	Q9DD02	HIKES_MOUSE	Hikeshi	Protein Hikeshi
AQMVKLVEL	G	R	9	2	0.9978	1	0	3M(15.9949)		sp|Q8R3F9|STPAP_MOUSE	Q8R3F9	STPAP_MOUSE	Tut1	Speckle targeted PIP5K1A-regulated poly(A) polymerase
AQNVGTTHDL	L	L	10	2	0.9525	2	0			sp|Q8R016|BLMH_MOUSE	Q8R016	BLMH_MOUSE	Blmh	Bleomycin hydrolase
AQPINFSVSL	L	L	10	2	0.999	5	0			sp|E9QAT4|SC16A_MOUSE	E9QAT4	SC16A_MOUSE	Sec16a	Protein transport protein Sec16A
AQPLLREVL	L	E	9	2	1	9	0			sp|P99026|PSB4_MOUSE	P99026	PSB4_MOUSE	Psmb4	Proteasome subunit beta type-4
AQPPGATNM	F	I	9	2	0.9652	2	0	9M(15.9949)		sp|Q501J6|DDX17_MOUSE	Q501J6	DDX17_MOUSE	Ddx17	Probable ATP-dependent RNA helicase DDX17
AQPSDPGMLPTM	R	I	12	2	0.9951	2	0	12M(15.9949), 8M(15.9949)		sp|Q61753|SERA_MOUSE	Q61753	SERA_MOUSE	Phgdh	D-3-phosphoglycerate dehydrogenase
AQPSNSLLGEL	G	S	11	2	0.9997	22	0			sp|Q9CW46|RAVR1_MOUSE	Q9CW46	RAVR1_MOUSE	Raver1	Ribonucleoprotein PTB-binding 1
AQPTLMIDFL	L	T	10	2	0.9945	1	0	6M(15.9949)		sp|Q8BHY2|NOC4L_MOUSE	Q8BHY2	NOC4L_MOUSE	Noc4l	Nucleolar complex protein 4 homolog
AQPVNVQQL	V	L	9	2	0.9915	7	0			sp|Q8CHI8|EP400_MOUSE	Q8CHI8	EP400_MOUSE	Ep400	E1A-binding protein p400
AQPYNPQAL	S	K	9	2	0.9821	1	0			sp|Q62407|SPEG_MOUSE	Q62407	SPEG_MOUSE	Speg	Striated muscle-specific serine/threonine-protein kinase
AQQHYPV	R	S	7	2	0.7678	1	0			sp|P11152|LIPL_MOUSE	P11152	LIPL_MOUSE	Lpl	Lipoprotein lipase
AQQLFQKL	S	M	8	2	0.9776	2	0			sp|Q8R420|ABCA3_MOUSE	Q8R420	ABCA3_MOUSE	Abca3	Phospholipid-transporting ATPase ABCA3
AQQMYQSL	T	A	8	2	0.9984	4	0	4M(15.9949)		sp|Q9DB32|HAGHL_MOUSE	Q9DB32	HAGHL_MOUSE	Haghl	Hydroxyacylglutathione hydrolase-like protein
AQQRFTQV	S	S	8	2	0.9681	1	0			sp|P70345|B2CL2_MOUSE	P70345	B2CL2_MOUSE	Bcl2l2	Bcl-2-like protein 2
AQQSYERL	K	D	8	2	0.9986	4	0			sp|Q8K012|FBP1L_MOUSE	Q8K012	FBP1L_MOUSE	Fnbp1l	Formin-binding protein 1-like
AQQSYKSL	R	V	8	2	0.9963	6	0			sp|Q7TSS2|UB2Q1_MOUSE	Q7TSS2	UB2Q1_MOUSE	Ube2q1	Ubiquitin-conjugating enzyme E2 Q1
AQQVNRTTL	Q	T	9	2	0.9996	1	0			sp|Q62311|TAF6_MOUSE	Q62311	TAF6_MOUSE	Taf6	Transcription initiation factor TFIID subunit 6
AQRDYFGA	Q	H	8	2	0.999	5	0			sp|Q9DCD0|6PGD_MOUSE	Q9DCD0	6PGD_MOUSE	Pgd	6-phosphogluconate dehydrogenase, decarboxylating
AQRFFTAM	D	F	8	2	0.9803	3	0	8M(15.9949)		sp|P05555|ITAM_MOUSE	P05555	ITAM_MOUSE	Itgam	Integrin alpha-M
AQRLYEAL	A	T	8	2	0.9114	1	0			sp|Q9QXK7|CPSF3_MOUSE	Q9QXK7	CPSF3_MOUSE	Cpsf3	Cleavage and polyadenylation specificity factor subunit 3
AQSINITEL	M	N	9	2	0.9954	4	0			sp|Q9WU28|PFD5_MOUSE	Q9WU28	PFD5_MOUSE	Pfdn5	Prefoldin subunit 5
AQSLNELDYL	A	S	10	2	0.9669	2	0			sp|Q8C0L8|COG5_MOUSE	Q8C0L8	COG5_MOUSE	Cog5	Conserved oligomeric Golgi complex subunit 5
AQSSNYAQHL	F	R	10	2	0.9737	1	0			sp|Q8BJ90|ZN771_MOUSE	Q8BJ90	ZN771_MOUSE	Znf771	Zinc finger protein 771
AQSTNSEETI	T	E	10	2	0.9965	7	0			sp|Q9JMH6|TRXR1_MOUSE	Q9JMH6	TRXR1_MOUSE	Txnrd1	Thioredoxin reductase 1, cytoplasmic
AQTSNSQEI	R	S	9	2	0.9889	5	0			sp|Q8BVK9|SP110_MOUSE	Q8BVK9	SP110_MOUSE	Sp110	Sp110 nuclear body protein
AQVEGGVHSL	S	H	10	2	0.8501	1	0			sp|P24547|IMDH2_MOUSE	P24547	IMDH2_MOUSE	Impdh2	Inosine-5'-monophosphate dehydrogenase 2
AQVENVQRI	G	Q	9	2	0.9879	1	0			sp|Q9D5R3|CEP83_MOUSE	Q9D5R3	CEP83_MOUSE	Cep83	Centrosomal protein of 83 kDa
AQVFNLTLL	L	C	9	2	0.9989	9	0			sp|Q9D2E2|TOE1_MOUSE	Q9D2E2	TOE1_MOUSE	Toe1	Target of EGR1 protein 1
AQVQNSEQL	L	L	9	2	0.9935	4	0			sp|Q91WG2|RABE2_MOUSE	Q91WG2	RABE2_MOUSE	Rabep2	Rab GTPase-binding effector protein 2
AQVQNSEQLL	L	R	10	2	0.9923	1	0			sp|Q91WG2|RABE2_MOUSE	Q91WG2	RABE2_MOUSE	Rabep2	Rab GTPase-binding effector protein 2
AQVRNQGYL	R	K	9	2	0.9998	1	0			sp|Q3UXL4|KIZ_MOUSE	Q3UXL4	KIZ_MOUSE	Kiz	Centrosomal protein kizuna
AQYEDIANR	R	S	9	2	0.9866	1	0			sp|P11679|K2C8_MOUSE	P11679	K2C8_MOUSE	Krt8	Keratin, type II cytoskeletal 8	Krt5, Krt75	sp|Q8BGZ7|K2C75_MOUSE, sp|Q922U2|K2C5_MOUSE
AQYEDIAQKS	K	K	10	2	0.9857	1	0			sp|Q3UV17|K22O_MOUSE	Q3UV17	K22O_MOUSE	Krt76	Keratin, type II cytoskeletal 2 oral
AQYENPPHIYA	A	L	11	2	0.9996	2	0			sp|E9Q634|MYO1E_MOUSE	E9Q634	MYO1E_MOUSE	Myo1e	Unconventional myosin-Ie
AQYENPPHIYAL	A	A	12	2	0.9834	1	0			sp|E9Q634|MYO1E_MOUSE	E9Q634	MYO1E_MOUSE	Myo1e	Unconventional myosin-Ie
AQYGKLESM	A	S	9	2	0.9945	1	0	9M(15.9949)		sp|Q9WV72|ASB3_MOUSE	Q9WV72	ASB3_MOUSE	Asb3	Ankyrin repeat and SOCS box protein 3
AQYGNILKHVM	F	S	11	3	0.9997	8	0	11M(15.9949)		sp|Q8R4R6|NUP35_MOUSE	Q8R4R6	NUP35_MOUSE	Nup35	Nucleoporin NUP35
AQYILMEFM	Q	K	9	2	0.9987	4	0	6M(15.9949), 9M(15.9949)		sp|Q3U3D7|T131L_MOUSE	Q3U3D7	T131L_MOUSE	Tmem131l	Transmembrane protein 131-like
AQYKFIYV	E	A	8	2	0.9999	40	0			sp|P29351|PTN6_MOUSE	P29351	PTN6_MOUSE	Ptpn6	Tyrosine-protein phosphatase non-receptor type 6
AQYKYIVI	E	E	8	2	0.9983	2	0			sp|Q8BK08|TMM11_MOUSE	Q8BK08	TMM11_MOUSE	Tmem11	Transmembrane protein 11, mitochondrial
AQYLFIQTF	E	W	9	2	0.9545	1	0			sp|Q91YK2|RRP1B_MOUSE	Q91YK2	RRP1B_MOUSE	Rrp1b	Ribosomal RNA processing protein 1 homolog B
AQYLLQNSV	N	K	9	2	0.9954	5	0			sp|P61979|HNRPK_MOUSE	P61979	HNRPK_MOUSE	Hnrnpk	Heterogeneous nuclear ribonucleoprotein K
AQYLVPHNL	F	E	9	2	0.9994	2	0			sp|Q6A026|PDS5A_MOUSE	Q6A026	PDS5A_MOUSE	Pds5a	Sister chromatid cohesion protein PDS5 homolog A
AQYMVPHNL	F	E	9	2	0.9988	2	0	4M(15.9949)		sp|Q4VA53|PDS5B_MOUSE	Q4VA53	PDS5B_MOUSE	Pds5b	Sister chromatid cohesion protein PDS5 homolog B
AQYNFILV	L	V	8	2	0.9903	15	0			sp|Q9D0R2|SYTC_MOUSE	Q9D0R2	SYTC_MOUSE	Tars1	Threonine--tRNA ligase 1, cytoplasmic	Tars3	sp|Q8BLY2|SYTC2_MOUSE
AQYNFILVV	L	G	9	2	0.9729	5	0			sp|Q9D0R2|SYTC_MOUSE	Q9D0R2	SYTC_MOUSE	Tars1	Threonine--tRNA ligase 1, cytoplasmic	Tars3	sp|Q8BLY2|SYTC2_MOUSE
AQYRFIYM	E	A	8	2	0.9985	9	0	8M(15.9949)		sp|P35235|PTN11_MOUSE	P35235	PTN11_MOUSE	Ptpn11	Tyrosine-protein phosphatase non-receptor type 11
AQYRLVTEI	E	Q	9	2	0.999	11	0			sp|Q80Y44|DDX10_MOUSE	Q80Y44	DDX10_MOUSE	Ddx10	Probable ATP-dependent RNA helicase DDX10
AQYSFDKL	M	K	8	2	0.9996	7	0			sp|Q8C547|HTR5B_MOUSE	Q8C547	HTR5B_MOUSE	Heatr5b	HEAT repeat-containing protein 5B
AQYSGAQVRVL	A	S	11	2	0.999	1	0			sp|Q9D8N0|EF1G_MOUSE	Q9D8N0	EF1G_MOUSE	Eef1g	Elongation factor 1-gamma
AQYSLPTSF	P	S	9	2	0.9998	17	0			sp|Q8K2K6|AGFG1_MOUSE	Q8K2K6	AGFG1_MOUSE	Agfg1	Arf-GAP domain and FG repeat-containing protein 1
AQYVSPELL	T	T	9	2	0.9474	1	0			sp|Q9Z2A0|PDPK1_MOUSE	Q9Z2A0	PDPK1_MOUSE	Pdpk1	3-phosphoinositide-dependent protein kinase 1
ARDPGMTSF	G	P	9	2	0.9849	1	0	6M(15.9949)		sp|P0CG14|DERPC_MOUSE	P0CG14	DERPC_MOUSE	Derpc	Decreased expression in renal and prostate cancer protein
ARDVATTL	M	K	8	2	0.7681	1	0			sp|P29477|NOS2_MOUSE	P29477	NOS2_MOUSE	Nos2	Nitric oxide synthase, inducible
ARIFFTYM	Y	P	8	2	0.9938	4	0	8M(15.9949)		sp|Q920L1|FADS1_MOUSE	Q920L1	FADS1_MOUSE	Fads1	Acyl-CoA (8-3)-desaturase
ARIIFNQV	T	M	8	2	0.9877	8	0			sp|Q07440|B2LA1_MOUSE	Q07440	B2LA1_MOUSE	Bcl2a1	Bcl-2-related protein A1
ARIILVNI	I	R	8	2	0.9739	3	0			sp|Q8CD92|TTC27_MOUSE	Q8CD92	TTC27_MOUSE	Ttc27	Tetratricopeptide repeat protein 27
ARPTLPSAQM	A	S	10	2	0.8137	1	0	10M(15.9949)		sp|P98083|SHC1_MOUSE	P98083	SHC1_MOUSE	Shc1	SHC-transforming protein 1
ARVFSNF	I	S	7	2	0.7456	1	0			sp|P24769|B4_VACCW	P24769	B4_VACCW	VACWR186	Ankyrin repeat protein B4
ARYEDPTL	R	R	8	2	0.9312	1	0			sp|Q8CGN4|BCOR_MOUSE	Q8CGN4	BCOR_MOUSE	Bcor	BCL-6 corepressor
ARYSGSYNDYL	Y	R	11	2	0.9997	5	0			sp|Q8C2Q3|RBM14_MOUSE	Q8C2Q3	RBM14_MOUSE	Rbm14	RNA-binding protein 14
ASARNLEHL	L	E	9	2	0.9862	1	0			sp|Q8BMI0|FBX38_MOUSE	Q8BMI0	FBX38_MOUSE	Fbxo38	F-box only protein 38
ASATRVVQV	M	V	9	2	0.9436	1	0			sp|Q9CQX8|KGD4_MOUSE	Q9CQX8	KGD4_MOUSE	Mrps36	Alpha-ketoglutarate dehydrogenase component 4
ASATSLGHF	A	T	9	2	0.9762	1	0			sp|P83741|WNK1_MOUSE	P83741	WNK1_MOUSE	Wnk1	Serine/threonine-protein kinase WNK1
ASAVSNNYI	D	Q	9	2	0.9946	1	0			sp|P30999|CTND1_MOUSE	P30999	CTND1_MOUSE	Ctnnd1	Catenin delta-1
ASAVSNNYIQTL	D	G	12	2	0.9997	5	0			sp|P30999|CTND1_MOUSE	P30999	CTND1_MOUSE	Ctnnd1	Catenin delta-1
ASFDASDAAIEAM	F	N	13	2	0.9966	2	0	13M(15.9949)		sp|Q8QZY9|SF3B4_MOUSE	Q8QZY9	SF3B4_MOUSE	Sf3b4	Splicing factor 3B subunit 4
ASFDKVAIPEV	P	K	11	2	0.9962	6	0			sp|P83741|WNK1_MOUSE	P83741	WNK1_MOUSE	Wnk1	Serine/threonine-protein kinase WNK1
ASFFNISTL	L	E	9	2	0.9832	2	0			sp|Q8C147|DOCK8_MOUSE	Q8C147	DOCK8_MOUSE	Dock8	Dedicator of cytokinesis protein 8
ASFGNKLLL	H	K	9	2	0.9188	1	0			sp|P05555|ITAM_MOUSE	P05555	ITAM_MOUSE	Itgam	Integrin alpha-M
ASFIFRQL	L	V	8	2	0.9962	2	0			sp|Q8CEE6|PASK_MOUSE	Q8CEE6	PASK_MOUSE	Pask	PAS domain-containing serine/threonine-protein kinase
ASFLYAEI	V	G	8	2	0.9876	6	0			sp|Q61334|BAP29_MOUSE	Q61334	BAP29_MOUSE	Bcap29	B-cell receptor-associated protein 29
ASFNFLGL	F	L	8	2	0.9961	2	0			sp|O35704|SPTC1_MOUSE	O35704	SPTC1_MOUSE	Sptlc1	Serine palmitoyltransferase 1
ASFNLPSAL	A	G	9	2	0.9721	1	0			sp|Q80X50|UBP2L_MOUSE	Q80X50	UBP2L_MOUSE	Ubap2l	Ubiquitin-associated protein 2-like
ASFRNTGEI	G	K	9	2	0.9987	5	0			sp|Q93092|TALDO_MOUSE	Q93092	TALDO_MOUSE	Taldo1	Transaldolase
ASFSAQTNM	M	H	9	2	0.9974	1	0	9M(15.9949)		sp|Q640N3|RHG30_MOUSE	Q640N3	RHG30_MOUSE	Arhgap30	Rho GTPase-activating protein 30
ASFSNGPVL	S	A	9	2	0.9981	2	0			sp|Q5F2E7|NUFP2_MOUSE	Q5F2E7	NUFP2_MOUSE	Nufip2	FMR1-interacting protein NUFIP2
ASFSNSTYL	S	Q	9	2	0.9977	5	0			sp|E9PXF8|MTMRD_MOUSE	E9PXF8	MTMRD_MOUSE	Sbf2	Myotubularin-related protein 13
ASFYYPLL	H	C	8	2	0.9617	9	0			sp|G3X9K3|BIG1_MOUSE	G3X9K3	BIG1_MOUSE	Arfgef1	Brefeldin A-inhibited guanine nucleotide-exchange protein 1
ASGPPVSELI	K	T	10	2	0.956	1	0			sp|P43277|H13_MOUSE	P43277	H13_MOUSE	H1-3	Histone H1.3	H1-2	sp|P15864|H12_MOUSE
ASGPPVSELITK	K	A	12	2	0.9999	3	0			sp|P43277|H13_MOUSE	P43277	H13_MOUSE	H1-3	Histone H1.3	H1-2	sp|P15864|H12_MOUSE
ASGTLLETI	L	A	9	2	0.9108	1	0			sp|Q8BHB4|WDR3_MOUSE	Q8BHB4	WDR3_MOUSE	Wdr3	WD repeat-containing protein 3
ASHLNLDAL	A	R	9	2	0.9991	16	0			sp|Q8CH72|TRI32_MOUSE	Q8CH72	TRI32_MOUSE	Trim32	E3 ubiquitin-protein ligase TRIM32
ASIANLINL	P	R	9	2	0.9966	5	0			sp|Q80TH2|ERBIN_MOUSE	Q80TH2	ERBIN_MOUSE	Erbin	Erbin
ASIDILHSI	E	V	9	2	0.976	1	0			sp|Q8BG32|PSD11_MOUSE	Q8BG32	PSD11_MOUSE	Psmd11	26S proteasome non-ATPase regulatory subunit 11
ASIENTSTL	C	H	9	2	0.9987	9	0			sp|Q5SPL2|PHF12_MOUSE	Q5SPL2	PHF12_MOUSE	Phf12	PHD finger protein 12
ASIIRYAI	A	G	8	2	0.875	1	0			sp|Q9QXH4|ITAX_MOUSE	Q9QXH4	ITAX_MOUSE	Itgax	Integrin alpha-X
ASIQNGKDSL	Q	T	10	2	1	4	0			sp|Q05512|MARK2_MOUSE	Q05512	MARK2_MOUSE	Mark2	Serine/threonine-protein kinase MARK2
ASISLAQYL	A	I	9	2	0.9236	1	0			sp|P60335|PCBP1_MOUSE	P60335	PCBP1_MOUSE	Pcbp1	Poly(rC)-binding protein 1	Pcbp2	sp|Q61990|PCBP2_MOUSE
ASISNISPHL	L	M	10	2	0.9996	1	0			sp|Q62504|MINT_MOUSE	Q62504	MINT_MOUSE	Spen	Msx2-interacting protein
ASITFEHM	K	F	8	2	0.9914	10	0	8M(15.9949)		sp|Q91WK2|EIF3H_MOUSE	Q91WK2	EIF3H_MOUSE	Eif3h	Eukaryotic translation initiation factor 3 subunit H
ASITLQQQL	N	K	9	2	0.9938	1	0			sp|Q04750|TOP1_MOUSE	Q04750	TOP1_MOUSE	Top1	DNA topoisomerase 1
ASIVNKDGL	L	L	9	2	0.9997	11	0			sp|P35396|PPARD_MOUSE	P35396	PPARD_MOUSE	Ppard	Peroxisome proliferator-activated receptor delta
ASIVNKDGLL	L	V	10	2	0.9608	1	0			sp|P35396|PPARD_MOUSE	P35396	PPARD_MOUSE	Ppard	Peroxisome proliferator-activated receptor delta
ASLDNKAEV	C	N	9	2	0.9776	2	0			sp|Q5BLK4|TUT7_MOUSE	Q5BLK4	TUT7_MOUSE	Tut7	Terminal uridylyltransferase 7
ASLEAAIADAEQR	R	G	13	3	0.9951	1	0			sp|P11679|K2C8_MOUSE	P11679	K2C8_MOUSE	Krt8	Keratin, type II cytoskeletal 8
ASLERMGPVM	G	D	10	2	0.9976	2	0	10M(15.9949), 6M(15.9949)		sp|Q9D0E1|HNRPM_MOUSE	Q9D0E1	HNRPM_MOUSE	Hnrnpm	Heterogeneous nuclear ribonucleoprotein M
ASLHNQITA	I	C	9	2	0.9828	2	0			sp|Q8C754|VPS52_MOUSE	Q8C754	VPS52_MOUSE	Vps52	Vacuolar protein sorting-associated protein 52 homolog
ASLISRLDEVL	R	R	11	2	0.9242	1	0			sp|P52633|STAT6_MOUSE	P52633	STAT6_MOUSE	Stat6	Signal transducer and transcription activator 6
ASLKLTLL	G	N	8	2	0.9239	2	0			sp|Q91V92|ACLY_MOUSE	Q91V92	ACLY_MOUSE	Acly	ATP-citrate synthase
ASLKNFKEL	D	T	9	2	0.9998	21	0			sp|P68438|RAP94_VACCW	P68438	RAP94_VACCW	RAP94	RNA polymerase-associated transcription-specificity factor RAP94
ASLKSLTYL	L	S	9	2	0.9918	3	0			sp|P57784|RU2A_MOUSE	P57784	RU2A_MOUSE	Snrpa1	U2 small nuclear ribonucleoprotein A'
ASLKSNYNLPM	A	H	11	2	0.8828	2	0	11M(15.9949)		sp|Q9D8E6|RL4_MOUSE	Q9D8E6	RL4_MOUSE	Rpl4	60S ribosomal protein L4
ASLKSTSTL	T	A	9	2	1	4	0			sp|Q61102|ABCB7_MOUSE	Q61102	ABCB7_MOUSE	Abcb7	Iron-sulfur clusters transporter ABCB7, mitochondrial
ASLLDYDTV	T	A	9	2	0.9972	5	0			sp|Q921M3|SF3B3_MOUSE	Q921M3	SF3B3_MOUSE	Sf3b3	Splicing factor 3B subunit 3
ASLLHSMPL	K	H	9	2	0.9949	2	0	7M(15.9949)		sp|Q8BRT1|CLAP2_MOUSE	Q8BRT1	CLAP2_MOUSE	Clasp2	CLIP-associating protein 2
ASLPEDDVD	A	Y	9	2	0.7369	1	0			sp|Q9EQY0|ERN1_MOUSE	Q9EQY0	ERN1_MOUSE	Ern1	Serine/threonine-protein kinase/endoribonuclease IRE1
ASLQLISHI	E	E	9	2	0.9998	3	0			sp|P27641|XRCC5_MOUSE	P27641	XRCC5_MOUSE	Xrcc5	X-ray repair cross-complementing protein 5
ASLQNAEKTM	C	Q	10	2	0.9907	1	0	10M(15.9949)		sp|Q8BW70|UBP38_MOUSE	Q8BW70	UBP38_MOUSE	Usp38	Ubiquitin carboxyl-terminal hydrolase 38
ASLQNFNISNL	T	Q	11	2	1	19	0			sp|P83741|WNK1_MOUSE	P83741	WNK1_MOUSE	Wnk1	Serine/threonine-protein kinase WNK1
ASLQNFNISNLQ	T	K	12	2	0.9966	1	0			sp|P83741|WNK1_MOUSE	P83741	WNK1_MOUSE	Wnk1	Serine/threonine-protein kinase WNK1
ASLRFDGAL	T	N	9	2	0.8268	1	0			sp|P05213|TBA1B_MOUSE	P05213	TBA1B_MOUSE	Tuba1b	Tubulin alpha-1B chain	Tuba1a, Tuba1c, Tuba3b, Tuba4a, Tuba8	sp|P05214|TBA3_MOUSE, sp|P68368|TBA4A_MOUSE, sp|P68369|TBA1A_MOUSE, sp|P68373|TBA1C_MOUSE, sp|Q9JJZ2|TBA8_MOUSE
ASLRFVFL	I	I	8	2	0.9922	2	0			sp|Q99L90|MCRS1_MOUSE	Q99L90	MCRS1_MOUSE	Mcrs1	Microspherule protein 1		rev_sp|Q3V0G7|GARL3_MOUSE
ASLRNLGDM	F	H	9	2	0.9995	2	0	9M(15.9949)		sp|Q99PP2|ZN318_MOUSE	Q99PP2	ZN318_MOUSE	Znf318	Zinc finger protein 318
ASLSNLHSL	S	D	9	2	0.9992	11	0			sp|Q9D1C2|CBY1_MOUSE	Q9D1C2	CBY1_MOUSE	Cby1	Protein chibby homolog 1
ASLSNRLYI	L	S	9	2	0.9996	5	0			sp|E9Q3L2|PI4KA_MOUSE	E9Q3L2	PI4KA_MOUSE	Pi4ka	Phosphatidylinositol 4-kinase alpha
ASLSTFQQM	L	W	9	2	0.9866	2	0	9M(15.9949)		sp|P60710|ACTB_MOUSE	P60710	ACTB_MOUSE	Actb	Actin, cytoplasmic 1	Acta1, Acta2, Actbl2, Actc1, Actg1, Actg2	sp|P62737|ACTA_MOUSE, sp|P63260|ACTG_MOUSE, sp|P63268|ACTH_MOUSE, sp|P68033|ACTC_MOUSE, sp|P68134|ACTS_MOUSE, sp|Q8BFZ3|ACTBL_MOUSE
ASLSYDGRL	F	V	9	2	0.9962	1	0			sp|Q8K0G5|EIPR1_MOUSE	Q8K0G5	EIPR1_MOUSE	Eipr1	EARP and GARP complex-interacting protein 1
ASLTLNETI	I	L	9	2	0.9935	1	0			sp|O35350|CAN1_MOUSE	O35350	CAN1_MOUSE	Capn1	Calpain-1 catalytic subunit
ASLTNNQNL	N	I	9	2	0.9903	3	0			sp|F6ZDS4|TPR_MOUSE	F6ZDS4	TPR_MOUSE	Tpr	Nucleoprotein TPR
ASLTNPFGKGAFI	H	Q	13	2	1	17	0			sp|Q99LH1|NOG2_MOUSE	Q99LH1	NOG2_MOUSE	Gnl2	Nucleolar GTP-binding protein 2
ASLTNQDAL	D	P	9	2	0.988	3	0			sp|Q9QXZ0|MACF1_MOUSE	Q9QXZ0	MACF1_MOUSE	Macf1	Microtubule-actin cross-linking factor 1, isoforms 1/2/3/4
ASLTSDPLARL	M	Q	11	2	0.9992	2	0			sp|Q80TZ9|RERE_MOUSE	Q80TZ9	RERE_MOUSE	Rere	Arginine-glutamic acid dipeptide repeats protein
ASLTSRTSM	L	G	9	2	0.9994	3	0	9M(15.9949)		sp|Q80U63|MFN2_MOUSE	Q80U63	MFN2_MOUSE	Mfn2	Mitofusin-2	Mfn1	sp|Q811U4|MFN1_MOUSE
ASLTVRNL	S	P	8	2	0.9797	1	0			sp|Q99K48|NONO_MOUSE	Q99K48	NONO_MOUSE	Nono	Non-POU domain-containing octamer-binding protein
ASLVFPLL	D	V	8	2	0.9946	12	0			sp|Q3TXU5|DHYS_MOUSE	Q3TXU5	DHYS_MOUSE	Dhps	Deoxyhypusine synthase
ASLVNADKL	I	A	9	2	0.9996	22	0			sp|P59016|VP33B_MOUSE	P59016	VP33B_MOUSE	Vps33b	Vacuolar protein sorting-associated protein 33B
ASLVNHVLL	D	I	9	2	0.9996	3	0			sp|Q8BHK9|ERC6L_MOUSE	Q8BHK9	ERC6L_MOUSE	Ercc6l	DNA excision repair protein ERCC-6-like
ASLVNHVLLI	D	M	10	2	0.9151	1	0			sp|Q8BHK9|ERC6L_MOUSE	Q8BHK9	ERC6L_MOUSE	Ercc6l	DNA excision repair protein ERCC-6-like
ASLVNKIGL	T	D	9	2	0.9993	3	0			sp|P51163|HEM4_MOUSE	P51163	HEM4_MOUSE	Uros	Uroporphyrinogen-III synthase
ASLVNSPSYL	H	T	10	2	0.9987	6	0			sp|Q3U3D7|T131L_MOUSE	Q3U3D7	T131L_MOUSE	Tmem131l	Transmembrane protein 131-like
ASLVSQDYV	F	N	9	2	0.9944	2	0			sp|Q920D3|MED28_MOUSE	Q920D3	MED28_MOUSE	Med28	Mediator of RNA polymerase II transcription subunit 28
ASLYSLAL	K	K	8	2	0.9543	6	0			sp|P58390|KCNN2_MOUSE	P58390	KCNN2_MOUSE	Kcnn2	Small conductance calcium-activated potassium channel protein 2
ASLYYQDMYGL	T	Y	11	2	0.9635	1	0	8M(15.9949)		sp|E9QAT4|SC16A_MOUSE	E9QAT4	SC16A_MOUSE	Sec16a	Protein transport protein Sec16A
ASMINVEYL	L	S	9	2	0.9999	10	0	3M(15.9949)		sp|O88491|NSD1_MOUSE	O88491	NSD1_MOUSE	Nsd1	Histone-lysine N-methyltransferase, H3 lysine-36 specific
ASMISPLAQQM	P	S	11	2	0.9757	1	0	11M(15.9949), 3M(15.9949)		sp|Q91W59|RBMS1_MOUSE	Q91W59	RBMS1_MOUSE	Rbms1	RNA-binding motif, single-stranded-interacting protein 1
ASMLNDELSHI	D	N	11	2	0.9974	2	0	3M(15.9949)		sp|Q922B6|TRAF7_MOUSE	Q922B6	TRAF7_MOUSE	Traf7	E3 ubiquitin-protein ligase TRAF7
ASMQNVVFDYL	D	H	11	2	0.9953	10	0	3M(15.9949)		sp|Q9CZ13|QCR1_MOUSE	Q9CZ13	QCR1_MOUSE	Uqcrc1	Cytochrome b-c1 complex subunit 1, mitochondrial
ASMSNDFKSVL	L	E	11	2	1	22	0	3M(15.9949)		sp|Q8K1E0|STX5_MOUSE	Q8K1E0	STX5_MOUSE	Stx5	Syntaxin-5
ASMTNLVKM	R	G	9	2	0.973	1	0	3M(15.9949), 9M(15.9949)		sp|Q924C1|XPO5_MOUSE	Q924C1	XPO5_MOUSE	Xpo5	Exportin-5
ASMTNRELM	L	S	9	2	0.9977	3	0	3M(15.9949), 9M(15.9949)		sp|Q8VDL4|ADPGK_MOUSE	Q8VDL4	ADPGK_MOUSE	Adpgk	ADP-dependent glucokinase
ASNINSVII	E	E	9	2	0.8427	1	0			sp|Q9CU65|ZMYM2_MOUSE	Q9CU65	ZMYM2_MOUSE	Zmym2	Zinc finger MYM-type protein 2
ASNVSKELL	C	Q	9	2	0.9036	1	0			sp|O88466|ZN106_MOUSE	O88466	ZN106_MOUSE	Znf106	Zinc finger protein 106
ASPANVGTL	V	H	9	2	0.9884	3	0			sp|Q3UMB5|SMCR8_MOUSE	Q3UMB5	SMCR8_MOUSE	Smcr8	Guanine nucleotide exchange protein SMCR8
ASPANVGTLHTL	V	S	12	2	0.8962	1	0			sp|Q3UMB5|SMCR8_MOUSE	Q3UMB5	SMCR8_MOUSE	Smcr8	Guanine nucleotide exchange protein SMCR8
ASPDRYLGL	G	P	9	2	0.8146	1	0			sp|Q80UM7|MOGS_MOUSE	Q80UM7	MOGS_MOUSE	Mogs	Mannosyl-oligosaccharide glucosidase
ASPEDRESL	Q	K	9	2	0.9981	3	0			sp|Q8VCM5|MUL1_MOUSE	Q8VCM5	MUL1_MOUSE	Mul1	Mitochondrial ubiquitin ligase activator of NFKB 1
ASPEFTKL	A	C	8	2	0.9997	20	0			sp|Q3TJZ6|FA98A_MOUSE	Q3TJZ6	FA98A_MOUSE	Fam98a	Protein FAM98A
ASPEGQDYL	I	K	9	2	0.9992	19	0			sp|Q99LF4|RTCB_MOUSE	Q99LF4	RTCB_MOUSE	Rtcb	RNA-splicing ligase RtcB homolog
ASPEGQLEV	I	Q	9	2	0.9687	1	0			sp|Q8CCE9|E4F1_MOUSE	Q8CCE9	E4F1_MOUSE	E4f1	Transcription factor E4F1
ASPIFTHV	S	Y	8	2	0.9974	17	0			sp|Q8C5N3|CWC22_MOUSE	Q8C5N3	CWC22_MOUSE	Cwc22	Pre-mRNA-splicing factor CWC22 homolog
ASPLNPDMKM	E	P	10	2	0.9999	2	0	10M(15.9949), 8M(15.9949)		sp|Q8BZ32|ASXL2_MOUSE	Q8BZ32	ASXL2_MOUSE	Asxl2	Putative Polycomb group protein ASXL2
ASPMSIPTNTM	M	H	11	2	0.9447	1	0	11M(15.9949), 4M(15.9949)		sp|Q9WVG6|CARM1_MOUSE	Q9WVG6	CARM1_MOUSE	Carm1	Histone-arginine methyltransferase CARM1
ASPPSFLQGL	G	C	10	2	0.9886	2	0			sp|P0CL69|ZN703_MOUSE	P0CL69	ZN703_MOUSE	Znf703	Zinc finger protein 703
ASPRGFPLGL	A	G	10	2	0.9784	5	0			sp|Q8CI08|SLAI2_MOUSE	Q8CI08	SLAI2_MOUSE	Slain2	SLAIN motif-containing protein 2
ASPTNPTAI	A	S	9	2	0.9987	5	0			sp|Q6PD24|AN13D_MOUSE	Q6PD24	AN13D_MOUSE	Ankrd13d	Ankyrin repeat domain-containing protein 13D
ASPVNRIVQM	T	S	10	2	0.9999	3	0	10M(15.9949)		sp|Q8CH25|SLTM_MOUSE	Q8CH25	SLTM_MOUSE	Sltm	SAFB-like transcription modulator
ASQANKDLL	A	K	9	2	0.9871	2	0			sp|Q3URQ0|TEX10_MOUSE	Q3URQ0	TEX10_MOUSE	Tex10	Testis-expressed protein 10
ASRANPYSI	A	V	9	2	0.9581	1	0			sp|P52187|KCJ12_MOUSE	P52187	KCJ12_MOUSE	Kcnj12	ATP-sensitive inward rectifier potassium channel 12
ASRIFPHL	R	Y	8	2	0.9885	1	0			sp|Q8K330|SSH3_MOUSE	Q8K330	SSH3_MOUSE	Ssh3	Protein phosphatase Slingshot homolog 3
ASSENLLHL	I	T	9	2	0.9965	3	0			sp|Q9JLQ0|CD2AP_MOUSE	Q9JLQ0	CD2AP_MOUSE	Cd2ap	CD2-associated protein
ASSNTLLNL	S	D	9	2	0.9254	2	0			sp|Q61789|LAMA3_MOUSE	Q61789	LAMA3_MOUSE	Lama3	Laminin subunit alpha-3
ASSPKFSEL	T	V	9	2	0.9987	3	0			sp|A2AGT5|CKAP5_MOUSE	A2AGT5	CKAP5_MOUSE	Ckap5	Cytoskeleton-associated protein 5
ASSTNILNL	F	V	9	2	0.9441	1	0			sp|Q9D720|NSE1_MOUSE	Q9D720	NSE1_MOUSE	Nsmce1	Non-structural maintenance of chromosomes element 1 homolog
ASSVNNVHV	D	R	9	2	0.9623	2	0			sp|Q8R422|CD109_MOUSE	Q8R422	CD109_MOUSE	Cd109	CD109 antigen
ASTINPDHL	P	S	9	2	0.9885	2	0			sp|Q8BZZ3|WWP1_MOUSE	Q8BZZ3	WWP1_MOUSE	Wwp1	NEDD4-like E3 ubiquitin-protein ligase WWP1
ASTTNQQEI	L	A	9	2	0.9988	13	0			sp|Q99JR8|SMRD2_MOUSE	Q99JR8	SMRD2_MOUSE	Smarcd2	SWI/SNF-related matrix-associated actin-dependent regulator of chromatin subfamily D member 2
ASVDNLLHL	H	S	9	2	0.999	5	0			sp|Q8BWP8|B4GA1_MOUSE	Q8BWP8	B4GA1_MOUSE	B4gat1	Beta-1,4-glucuronyltransferase 1
ASVEFLMTV	C	A	9	2	0.9998	5	0	7M(15.9949)		sp|Q5H8C4|VP13A_MOUSE	Q5H8C4	VP13A_MOUSE	Vps13a	Intermembrane lipid transfer protein VPS13A	Vps13c	sp|Q8BX70|VP13C_MOUSE
ASVLLQDHI	L	R	9	2	0.996	2	0			sp|Q91YH5|ATLA3_MOUSE	Q91YH5	ATLA3_MOUSE	Atl3	Atlastin-3
ASVLNKWQM	G	N	9	2	0.9899	2	0	9M(15.9949)		sp|Q91VR5|DDX1_MOUSE	Q91VR5	DDX1_MOUSE	Ddx1	ATP-dependent RNA helicase DDX1
ASVLNTDPAL	L	D	10	2	0.9991	2	0			sp|Q99KK7|DPP3_MOUSE	Q99KK7	DPP3_MOUSE	Dpp3	Dipeptidyl peptidase 3
ASVLNVNHI	S	K	9	2	0.9994	41	0	7N(0.9840)		sp|Q99NH0|ANR17_MOUSE	Q99NH0	ANR17_MOUSE	Ankrd17	Ankyrin repeat domain-containing protein 17
ASVPGHMAL	L	P	9	2	0.9987	5	0	7M(15.9949)		sp|P47930|FOSL2_MOUSE	P47930	FOSL2_MOUSE	Fosl2	Fos-related antigen 2
ASVPNLQTV	L	S	9	2	0.9857	1	0			sp|Q62445|SP4_MOUSE	Q62445	SP4_MOUSE	Sp4	Transcription factor Sp4
ASVPSLTHL	L	C	9	2	0.9802	1	0			sp|Q9WV72|ASB3_MOUSE	Q9WV72	ASB3_MOUSE	Asb3	Ankyrin repeat and SOCS box protein 3
ASVQNEAKL	T	D	9	2	0.9998	5	0			sp|Q9WUM4|COR1C_MOUSE	Q9WUM4	COR1C_MOUSE	Coro1c	Coronin-1C
ASVSNGATF	E	L	9	2	0.8707	1	0			sp|Q9R097|SPIT1_MOUSE	Q9R097	SPIT1_MOUSE	Spint1	Kunitz-type protease inhibitor 1
ASVSNGATFL	E	G	10	2	1	4	0			sp|Q9R097|SPIT1_MOUSE	Q9R097	SPIT1_MOUSE	Spint1	Kunitz-type protease inhibitor 1
ASVSNPLFL	W	P	9	2	0.9994	28	0			sp|P70428|EXT2_MOUSE	P70428	EXT2_MOUSE	Ext2	Exostosin-2
ASVTFSLL	T	V	8	2	0.958	1	0			sp|E9Q2M9|WDFY4_MOUSE	E9Q2M9	WDFY4_MOUSE	Wdfy4	WD repeat- and FYVE domain-containing protein 4
ASVTGHTNI	S	V	9	2	0.9992	2	0			sp|Q8CEF1|FEM1C_MOUSE	Q8CEF1	FEM1C_MOUSE	Fem1c	Protein fem-1 homolog C	Fem1aa	sp|Q9Z2G1|FM1AA_MOUSE
ASVVHQDNF	V	S	9	2	0.9864	2	0			sp|O70145|NCF2_MOUSE	O70145	NCF2_MOUSE	Ncf2	Neutrophil cytosol factor 2
ASVVHSTDL	A	V	9	2	0.9961	2	0			sp|Q61425|HCDH_MOUSE	Q61425	HCDH_MOUSE	Hadh	Hydroxyacyl-coenzyme A dehydrogenase, mitochondrial
ASVVNLLKDVL	R	H	11	2	0.9241	1	0			sp|A8C756|THADA_MOUSE	A8C756	THADA_MOUSE	Thada	Thyroid adenoma-associated protein homolog
ASVVNPGAI	N	Y	9	2	0.9757	1	0			sp|Q00651|ITA4_MOUSE	Q00651	ITA4_MOUSE	Itga4	Integrin alpha-4
ASYARPIFL	L	R	9	2	0.9727	1	0			sp|Q60714|S27A1_MOUSE	Q60714	S27A1_MOUSE	Slc27a1	Long-chain fatty acid transport protein 1
ASYEFTTL	A	T	8	2	0.9997	41	0			sp|Q9QXB9|DRG2_MOUSE	Q9QXB9	DRG2_MOUSE	Drg2	Developmentally-regulated GTP-binding protein 2
ASYEFVQRL	Y	L	9	2	1	58	0	7Q(0.9840)		sp|Q9JHU4|DYHC1_MOUSE	Q9JHU4	DYHC1_MOUSE	Dync1h1	Cytoplasmic dynein 1 heavy chain 1
ASYEFVQRLL	Y	K	10	2	0.8012	1	0			sp|Q9JHU4|DYHC1_MOUSE	Q9JHU4	DYHC1_MOUSE	Dync1h1	Cytoplasmic dynein 1 heavy chain 1
ASYEVKEL	D	Y	8	2	0.9955	3	0			sp|Q60967|PAPS1_MOUSE	Q60967	PAPS1_MOUSE	Papss1	Bifunctional 3'-phosphoadenosine 5'-phosphosulfate synthase 1
ASYGAQSAASSL	A	A	12	2	0.9412	1	0			sp|Q8C2Q3|RBM14_MOUSE	Q8C2Q3	RBM14_MOUSE	Rbm14	RNA-binding protein 14
ASYINPDHL	P	K	9	2	0.9999	2	0			sp|Q8C863|ITCH_MOUSE	Q8C863	ITCH_MOUSE	Itch	E3 ubiquitin-protein ligase Itchy
ASYLFRGL	G	A	8	2	0.9994	7	0			sp|Q7TN60|TMC6_MOUSE	Q7TN60	TMC6_MOUSE	Tmc6	Transmembrane channel-like protein 6
ASYLLAAL	V	G	8	2	0.9974	35	0			sp|P99027|RLA2_MOUSE	P99027	RLA2_MOUSE	Rplp2	60S acidic ribosomal protein P2
ASYNHPVL	S	G	8	2	0.9885	2	0			sp|Q6NZM9|HDAC4_MOUSE	Q6NZM9	HDAC4_MOUSE	Hdac4	Histone deacetylase 4
ASYNHSQV	L	S	8	2	0.9839	3	0			sp|P53762|ARNT_MOUSE	P53762	ARNT_MOUSE	Arnt	Aryl hydrocarbon receptor nuclear translocator
ASYQFPMV	S	P	8	2	0.9881	2	0	7M(15.9949)		sp|Q08775|RUNX2_MOUSE	Q08775	RUNX2_MOUSE	Runx2	Runt-related transcription factor 2
ASYRAQPSV	A	S	9	2	0.9855	2	0			sp|Q8C2Q3|RBM14_MOUSE	Q8C2Q3	RBM14_MOUSE	Rbm14	RNA-binding protein 14
ASYRAQPSVSL	A	G	11	2	0.9999	10	0			sp|Q8C2Q3|RBM14_MOUSE	Q8C2Q3	RBM14_MOUSE	Rbm14	RNA-binding protein 14
ASYSQVAHI	S	P	9	2	0.9985	1	0			sp|Q60795|NF2L2_MOUSE	Q60795	NF2L2_MOUSE	Nfe2l2	Nuclear factor erythroid 2-related factor 2
ASYSSQPAAYV	A	A	11	2	0.9077	1	0			sp|Q8C2Q3|RBM14_MOUSE	Q8C2Q3	RBM14_MOUSE	Rbm14	RNA-binding protein 14
ASYTFKATV	Q	N	9	2	0.9296	1	0			sp|P08508|FCGR3_MOUSE	P08508	FCGR3_MOUSE	Fcgr3	Low affinity immunoglobulin gamma Fc region receptor III	Fcgr2	sp|P08101|FCGR2_MOUSE
ASYTYLSL	R	G	8	2	0.9933	17	0			sp|P29391|FRIL1_MOUSE	P29391	FRIL1_MOUSE	Ftl1	Ferritin light chain 1	Ftl2	sp|P49945|FRIL2_MOUSE
ASYVNLPTI	E	A	9	2	0.9999	22	0			sp|P14206|RSSA_MOUSE	P14206	RSSA_MOUSE	Rpsa	40S ribosomal protein SA
ASYVNLPTIAL	E	C	11	2	0.9999	6	0			sp|P14206|RSSA_MOUSE	P14206	RSSA_MOUSE	Rpsa	40S ribosomal protein SA
ASYVYLSM	Y	S	8	2	0.9988	20	0	8M(15.9949)		sp|P09528|FRIH_MOUSE	P09528	FRIH_MOUSE	Fth1	Ferritin heavy chain	Ftmt	sp|Q9D5H4|FTMT_MOUSE
ASYYAPVR	A	-	8	2	0.8245	1	0			iRT-pepG	iRT-pepG	iRT-pepG		iRT-pepG
ASYYNVDVL	A	K	9	2	0.9806	2	0			sp|Q3UQN2|FCHO2_MOUSE	Q3UQN2	FCHO2_MOUSE	Fcho2	F-BAR domain only protein 2
ATAENAHVL	A	Q	9	2	0.9956	1	0			sp|Q9DBM1|GPTC1_MOUSE	Q9DBM1	GPTC1_MOUSE	Gpatch1	G patch domain-containing protein 1
ATALNILAL	D	S	9	2	0.9609	2	0			sp|P17439|GBA1_MOUSE	P17439	GBA1_MOUSE	Gba1	Lysosomal acid glucosylceramidase
ATANFANF	T	A	8	2	0.7463	1	0			sp|Q8K2K6|AGFG1_MOUSE	Q8K2K6	AGFG1_MOUSE	Agfg1	Arf-GAP domain and FG repeat-containing protein 1
ATATHTDVL	C	K	9	2	0.9728	1	0			sp|Q8R5K4|NOL6_MOUSE	Q8R5K4	NOL6_MOUSE	Nol6	Nucleolar protein 6
ATFDFSQYM	L	K	9	2	0.9998	8	0	9M(15.9949)		sp|P43247|MSH2_MOUSE	P43247	MSH2_MOUSE	Msh2	DNA mismatch repair protein Msh2
ATFEFTANV	R	A	9	2	0.9993	5	0			sp|B1AVY7|KI16B_MOUSE	B1AVY7	KI16B_MOUSE	Kif16b	Kinesin-like protein KIF16B
ATFEKESVM	S	-	9	2	0.9999	6	0	9M(15.9949)		sp|P51912|AAAT_MOUSE	P51912	AAAT_MOUSE	Slc1a5	Neutral amino acid transporter B(0)
ATFEYSFI	Q	P	8	2	0.9936	17	0			sp|Q9CY50|SSRA_MOUSE	Q9CY50	SSRA_MOUSE	Ssr1	Translocon-associated protein subunit alpha
ATFGTASM	A	S	8	2	0.9956	1	0	8M(15.9949)		sp|Q8K2K6|AGFG1_MOUSE	Q8K2K6	AGFG1_MOUSE	Agfg1	Arf-GAP domain and FG repeat-containing protein 1
ATFGTFESLL	Q	R	10	2	0.9565	1	0			sp|Q8BMK4|CKAP4_MOUSE	Q8BMK4	CKAP4_MOUSE	Ckap4	Cytoskeleton-associated protein 4
ATFGVDESNAK	E	-	11	2	0.8796	1	0			iRT-pepC	iRT-pepC	iRT-pepC		iRT-pepC
ATFGYPFRL	T	N	9	2	0.9963	1	0			sp|O09117|SYPL1_MOUSE	O09117	SYPL1_MOUSE	Sypl1	Synaptophysin-like protein 1
ATFIFSYI	F	T	8	2	0.9956	3	0			sp|Q9CR48|DRAM2_MOUSE	Q9CR48	DRAM2_MOUSE	Dram2	DNA damage-regulated autophagy modulator protein 2
ATFIREVLM	N	R	9	2	0.9966	6	0	9M(15.9949)		sp|P22437|PGH1_MOUSE	P22437	PGH1_MOUSE	Ptgs1	Prostaglandin G/H synthase 1
ATFLYAEV	V	F	8	2	0.9922	5	0			sp|Q61335|BAP31_MOUSE	Q61335	BAP31_MOUSE	Bcap31	B-cell receptor-associated protein 31
ATFLYAEVF	V	A	9	2	0.9776	1	0			sp|Q61335|BAP31_MOUSE	Q61335	BAP31_MOUSE	Bcap31	B-cell receptor-associated protein 31
ATFLYTEPL	D	G	9	2	0.9852	1	0			sp|Q9DB26|PHYD1_MOUSE	Q9DB26	PHYD1_MOUSE	Phyhd1	Phytanoyl-CoA dioxygenase domain-containing protein 1
ATFPFAML	T	L	8	2	0.9996	41	0	7M(15.9949)		sp|O35316|SC6A6_MOUSE	O35316	SC6A6_MOUSE	Slc6a6	Sodium- and chloride-dependent taurine transporter
ATFPKEIQM	S	L	9	2	0.9675	3	0	9M(15.9949)		sp|P16381|DDX3L_MOUSE	P16381	DDX3L_MOUSE	D1Pas1	Putative ATP-dependent RNA helicase Pl10	Ddx3x, Ddx3y	sp|Q62095|DDX3Y_MOUSE, sp|Q62167|DDX3X_MOUSE
ATFSFESL	S	S	8	2	0.9958	7	0			sp|Q6P4T1|SNX19_MOUSE	Q6P4T1	SNX19_MOUSE	Snx19	Sorting nexin-19
ATFVFNVF	F	D	8	2	0.9816	1	0			sp|Q8BNY6|NCS1_MOUSE	Q8BNY6	NCS1_MOUSE	Ncs1	Neuronal calcium sensor 1
ATGPYPSM	P	P	8	2	0.9895	2	0	8M(15.9949)		sp|Q99LI8|HGS_MOUSE	Q99LI8	HGS_MOUSE	Hgs	Hepatocyte growth factor-regulated tyrosine kinase substrate
ATGPYRAF	V	R	8	2	0.8734	1	0			sp|Q6A0A9|F120A_MOUSE	Q6A0A9	F120A_MOUSE	FAM120A	Constitutive coactivator of PPAR-gamma-like protein 1
ATGTARVHTILQDLGL	T	S	16	4	0.8797	1	0			sp|Q3TRM8|HXK3_MOUSE	Q3TRM8	HXK3_MOUSE	Hk3	Hexokinase-3
ATGVNANAV	A	A	9	2	0.9948	1	0			sp|Q8R2V2|IFFO2_MOUSE	Q8R2V2	IFFO2_MOUSE	Iffo2	Intermediate filament family orphan 2
ATIANFSEL	L	G	9	2	0.9887	1	0			sp|Q9WTN6|S22AL_MOUSE	Q9WTN6	S22AL_MOUSE	Slc22a21	Solute carrier family 22 member 21	Slc22a5	sp|Q9Z0E8|S22A5_MOUSE
ATIFFTRL	E	I	8	2	0.9976	5	0			sp|Q61194|P3C2A_MOUSE	Q61194	P3C2A_MOUSE	Pik3c2a	Phosphatidylinositol 4-phosphate 3-kinase C2 domain-containing subunit alpha
ATIGMVYTL	T	C	9	2	0.9786	1	0	5M(15.9949)		sp|Q5XF90|AT134_MOUSE	Q5XF90	AT134_MOUSE	Atp13a4	Probable cation-transporting ATPase 13A4
ATIIIDTNY	H	K	9	2	0.8413	2	0			sp|P04305|D5_VACCW	P04305	D5_VACCW	VACWR110	Primase D5
ATIILTKM	Y	M	8	2	0.9326	1	0	8M(15.9949)		sp|Q91VS7|MGST1_MOUSE	Q91VS7	MGST1_MOUSE	Mgst1	Microsomal glutathione S-transferase 1
ATIINEEVL	N	N	9	2	0.9998	40	0			sp|P14576|SRP54_MOUSE	P14576	SRP54_MOUSE	Srp54	Signal recognition particle 54 kDa protein
ATIKFEML	V	S	8	2	0.9901	2	0	7M(15.9949)		sp|Q6PJN8|DALD3_MOUSE	Q6PJN8	DALD3_MOUSE	Dalrd3	DALR anticodon-binding domain-containing protein 3
ATILNLERV	M	T	9	2	0.9916	2	0			sp|Q8R1U1|COG4_MOUSE	Q8R1U1	COG4_MOUSE	Cog4	Conserved oligomeric Golgi complex subunit 4
ATIRVTNL	N	S	8	2	0.9994	17	0			sp|Q9Z1D1|EIF3G_MOUSE	Q9Z1D1	EIF3G_MOUSE	Eif3g	Eukaryotic translation initiation factor 3 subunit G
ATISHATV	N	S	8	2	0.976	1	0			sp|P31996|CD68_MOUSE	P31996	CD68_MOUSE	Cd68	Macrosialin
ATISNDGATI	K	L	10	2	0.9998	5	0			sp|P80313|TCPH_MOUSE	P80313	TCPH_MOUSE	Cct7	T-complex protein 1 subunit eta
ATISNDGATIL	K	K	11	2	0.871	1	0			sp|P80313|TCPH_MOUSE	P80313	TCPH_MOUSE	Cct7	T-complex protein 1 subunit eta
ATISYYQL	S	M	8	2	0.97	1	0			sp|Q3TBD2|HMHA1_MOUSE	Q3TBD2	HMHA1_MOUSE	Arhgap45	Rho GTPase-activating protein 45
ATITDKEML	I	K	9	2	0.9858	2	0	8M(15.9949)		sp|Q99NH0|ANR17_MOUSE	Q99NH0	ANR17_MOUSE	Ankrd17	Ankyrin repeat domain-containing protein 17
ATIVMLTNL	S	K	9	2	0.9993	2	0	5M(15.9949)		sp|P49446|PTPRE_MOUSE	P49446	PTPRE_MOUSE	Ptpre	Receptor-type tyrosine-protein phosphatase epsilon
ATKINITEM	G	H	9	2	0.9828	2	0	9M(15.9949)		sp|Q3UTY6|THSD4_MOUSE	Q3UTY6	THSD4_MOUSE	Thsd4	Thrombospondin type-1 domain-containing protein 4
ATKTPSSDVL	I	V	10	2	0.953	2	0			sp|Q60973|RBBP7_MOUSE	Q60973	RBBP7_MOUSE	Rbbp7	Histone-binding protein RBBP7	Rbbp4	sp|Q60972|RBBP4_MOUSE
ATLAYKKL	S	M	8	2	0.9891	1	0			sp|Q8C3J5|DOCK2_MOUSE	Q8C3J5	DOCK2_MOUSE	Dock2	Dedicator of cytokinesis protein 2
ATLAYTKL	S	T	8	2	0.9978	1	0			sp|Q8BUR4|DOCK1_MOUSE	Q8BUR4	DOCK1_MOUSE	Dock1	Dedicator of cytokinesis protein 1
ATLEFEERL	R	R	9	2	0.9696	1	0			sp|Q5SW75|SSH2_MOUSE	Q5SW75	SSH2_MOUSE	Ssh2	Protein phosphatase Slingshot homolog 2
ATLEFTQL	A	C	8	2	0.999	47	0	7Q(0.9840)		sp|P29477|NOS2_MOUSE	P29477	NOS2_MOUSE	Nos2	Nitric oxide synthase, inducible
ATLEKQETI	L	E	9	2	0.9776	1	0			sp|Q7TSI3|PP6R1_MOUSE	Q7TSI3	PP6R1_MOUSE	Ppp6r1	Serine/threonine-protein phosphatase 6 regulatory subunit 1
ATLENVTNL	K	R	9	2	0.9972	14	0			sp|Q8BHG2|CZIB_MOUSE	Q8BHG2	CZIB_MOUSE	Czib	CXXC motif containing zinc binding protein
ATLERLEGM	Q	L	9	2	0.9915	2	0	9M(15.9949)		sp|Q61189|ICLN_MOUSE	Q61189	ICLN_MOUSE	Clns1a	Methylosome subunit pICln
ATLIHQVL	L	E	8	2	0.9355	1	0			sp|Q9CZ04|CSN7A_MOUSE	Q9CZ04	CSN7A_MOUSE	Cops7a	COP9 signalosome complex subunit 7a
ATLKEYPAV	C	R	9	2	0.9872	2	0			sp|O08599|STXB1_MOUSE	O08599	STXB1_MOUSE	Stxbp1	Syntaxin-binding protein 1
ATLKSMNL	D	E	8	2	0.8722	1	0	6M(15.9949)		sp|Q99LU0|CH1B1_MOUSE	Q99LU0	CH1B1_MOUSE	Chmp1b1	Charged multivesicular body protein 1b-1
ATLLYALL	T	R	8	2	0.9343	2	0			sp|Q8CBG9|RN170_MOUSE	Q8CBG9	RN170_MOUSE	Rnf170	E3 ubiquitin-protein ligase RNF170	Neurl4	sp|Q5NCX5|NEUL4_MOUSE
ATLMYTYV	R	F	8	2	0.9976	1	0	4M(15.9949)		sp|Q9Z1K5|ARI1_MOUSE	Q9Z1K5	ARI1_MOUSE	Arih1	E3 ubiquitin-protein ligase ARIH1
ATLNRFSAL	P	Q	9	2	0.9942	2	0			sp|Q6NZJ6|IF4G1_MOUSE	Q6NZJ6	IF4G1_MOUSE	Eif4g1	Eukaryotic translation initiation factor 4 gamma 1
ATLPRPGDPG	S	A	10	2	0.8366	2	0			sp|Q9Z0H7|BCL10_MOUSE	Q9Z0H7	BCL10_MOUSE	Bcl10	B-cell lymphoma/leukemia 10
ATLQEYPSI	C	R	9	2	0.9903	2	0			sp|Q64324|STXB2_MOUSE	Q64324	STXB2_MOUSE	Stxbp2	Syntaxin-binding protein 2
ATLRNTNPNF	M	V	10	2	0.7871	1	0			sp|Q8VDD5|MYH9_MOUSE	Q8VDD5	MYH9_MOUSE	Myh9	Myosin-9	Myh10	sp|Q61879|MYH10_MOUSE
ATLRYASL	G	K	8	2	0.9835	1	0			sp|Q9DBR4|APBB2_MOUSE	Q9DBR4	APBB2_MOUSE	Apbb2	Amyloid beta precursor protein binding family B member 2
ATLSNTQTL	E	E	9	2	0.9977	2	0			sp|Q8C267|SETB2_MOUSE	Q8C267	SETB2_MOUSE	Setdb2	Histone-lysine N-methyltransferase SETDB2
ATLSNTTKA	Q	R	9	2	0.9407	1	0			sp|Q9JJ28|FLII_MOUSE	Q9JJ28	FLII_MOUSE	Flii	Protein flightless-1 homolog
ATLSVHQL	N	V	8	2	0.9948	2	0			sp|P68372|TBB4B_MOUSE	P68372	TBB4B_MOUSE	Tubb4b	Tubulin beta-4B chain	Tubb2a, Tubb2b, Tubb4a, Tubb5, Tubb6	sp|P99024|TBB5_MOUSE, sp|Q7TMM9|TBB2A_MOUSE, sp|Q922F4|TBB6_MOUSE, sp|Q9CWF2|TBB2B_MOUSE, sp|Q9D6F9|TBB4A_MOUSE
ATLVFHNL	H	L	8	2	0.9997	34	0			sp|P42227|STAT3_MOUSE	P42227	STAT3_MOUSE	Stat3	Signal transducer and activator of transcription 3
ATLYFENV	E	T	8	2	0.8518	1	0			sp|P25213|B18_VACCW	P25213	B18_VACCW	VACWR200	Soluble interferon alpha/beta receptor B18
ATMLFAEL	E	T	8	2	0.9985	7	0	3M(15.9949)		sp|O88545|CSN6_MOUSE	O88545	CSN6_MOUSE	Cops6	COP9 signalosome complex subunit 6
ATMQNLNDR	K	L	9	2	0.9728	1	0			sp|Q9QWL7|K1C17_MOUSE	Q9QWL7	K1C17_MOUSE	Krt17	Keratin, type I cytoskeletal 17	Krt23	sp|Q99PS0|K1C23_MOUSE
ATPAKPASPGP	Y	R	11	2	0.9718	1	0			sp|Q6PJN8|DALD3_MOUSE	Q6PJN8	DALD3_MOUSE	Dalrd3	DALR anticodon-binding domain-containing protein 3
ATPGRILDLI	I	K	10	2	0.868	2	0			sp|P54823|DDX6_MOUSE	P54823	DDX6_MOUSE	Ddx6	Probable ATP-dependent RNA helicase DDX6
ATPGRLIDFL	I	E	10	2	0.9998	18	0			sp|Q61656|DDX5_MOUSE	Q61656	DDX5_MOUSE	Ddx5	Probable ATP-dependent RNA helicase DDX5	Ddx17	sp|Q501J6|DDX17_MOUSE
ATPIFSKM	I	A	8	2	0.9866	5	0	8M(15.9949)		sp|P10649|GSTM1_MOUSE	P10649	GSTM1_MOUSE	Gstm1	Glutathione S-transferase Mu 1
ATPINTVDV	S	N	9	2	0.9681	1	0			sp|Q8BL66|EEA1_MOUSE	Q8BL66	EEA1_MOUSE	Eea1	Early endosome antigen 1
ATPKTQFSGL	R	R	10	2	0.7785	1	0			sp|O09159|MA2B1_MOUSE	O09159	MA2B1_MOUSE	Man2b1	Lysosomal alpha-mannosidase
ATPLFFSL	L	R	8	2	0.9927	1	0			sp|P36371|TAP2_MOUSE	P36371	TAP2_MOUSE	Tap2	Antigen peptide transporter 2
ATPLLMRPM	M	S	9	2	0.9898	4	0	6M(15.9949), 9M(15.9949)		sp|P04441|HG2A_MOUSE	P04441	HG2A_MOUSE	Cd74	H-2 class II histocompatibility antigen gamma chain
ATPRFSGL	R	C	8	2	0.9904	2	0			sp|Q8BFR5|EFTU_MOUSE	Q8BFR5	EFTU_MOUSE	Tufm	Elongation factor Tu, mitochondrial
ATQQFQQL	V	Q	8	2	0.9983	21	0			sp|P11370|ENV2_MOUSE	P11370	ENV2_MOUSE	Fv4	Retrovirus-related Env polyprotein from Fv-4 locus
ATQVYPKL	E	Y	8	2	0.9994	33	0			sp|Q8K3W0|BABA2_MOUSE	Q8K3W0	BABA2_MOUSE	Babam2	BRISC and BRCA1-A complex member 2
ATQVYTIL	S	T	8	2	0.9649	1	0			sp|O54965|RNF13_MOUSE	O54965	RNF13_MOUSE	Rnf13	E3 ubiquitin-protein ligase RNF13
ATRLMAQL	E	-	8	2	0.9904	1	0	5M(15.9949)		sp|Q0VG62|RBIS_MOUSE	Q0VG62	RBIS_MOUSE	Rbis	Ribosomal biogenesis factor
ATRSFPQL	L	K	8	2	0.9972	19	0			sp|Q07076|ANXA7_MOUSE	Q07076	ANXA7_MOUSE	Anxa7	Annexin A7
ATSLNQAAL	D	Y	9	2	0.9903	3	0			sp|P51660|DHB4_MOUSE	P51660	DHB4_MOUSE	Hsd17b4	Peroxisomal multifunctional enzyme type 2
ATTLLPKL	S	I	8	2	0.9709	1	0			sp|Q9Z0S9|PRAF1_MOUSE	Q9Z0S9	PRAF1_MOUSE	Rabac1	Prenylated Rab acceptor protein 1
ATVGPISVAM	V	D	10	2	0.9988	30	0	10M(15.9949)		sp|P06797|CATL1_MOUSE	P06797	CATL1_MOUSE	Ctsl	Procathepsin L
ATVGPLVVYL	Y	A	10	2	0.9951	1	0			sp|Q5U458|DJC11_MOUSE	Q5U458	DJC11_MOUSE	Dnajc11	DnaJ homolog subfamily C member 11
ATVGYQPQEL	V	L	10	2	0.9757	1	0			sp|P53762|ARNT_MOUSE	P53762	ARNT_MOUSE	Arnt	Aryl hydrocarbon receptor nuclear translocator
ATVKNAGLI	S	S	9	2	0.9112	1	0			sp|P97929|BRCA2_MOUSE	P97929	BRCA2_MOUSE	Brca2	Breast cancer type 2 susceptibility protein homolog
ATVMNNLSEL	Y	T	10	2	0.759	1	0	4M(15.9949)		sp|P04298|MCEL_VACCW	P04298	MCEL_VACCW	VACWR106	mRNA-capping enzyme catalytic subunit
ATVNNPTAI	C	T	9	2	0.9352	1	0			sp|Q80UP5|AN13A_MOUSE	Q80UP5	AN13A_MOUSE	Ankrd13a	Ankyrin repeat domain-containing protein 13A
ATVPNTIVV	S	N	9	2	0.972	2	0			sp|O54714|PIAS3_MOUSE	O54714	PIAS3_MOUSE	Pias3	E3 SUMO-protein ligase PIAS3
ATVPPYLGP	V	D	9	2	0.7639	1	0			sp|O35126|ATN1_MOUSE	O35126	ATN1_MOUSE	Atn1	Atrophin-1
ATVSNGPFL	E	Q	9	2	0.9991	5	0			sp|Q69ZF8|MSL2_MOUSE	Q69ZF8	MSL2_MOUSE	Msl2	E3 ubiquitin-protein ligase MSL2
ATVTGGAWYL	T	A	10	2	0.9933	1	0			sp|Q9WUE3|C56D2_MOUSE	Q9WUE3	C56D2_MOUSE	Cyb561d2	Transmembrane reductase CYB561D2
ATVTNPTTT	P	P	9	2	0.9987	1	0			sp|F6ZDS4|TPR_MOUSE	F6ZDS4	TPR_MOUSE	Tpr	Nucleoprotein TPR
ATVVNDERF	L	V	9	2	0.9996	3	0			sp|Q9DCD2|SYF1_MOUSE	Q9DCD2	SYF1_MOUSE	Xab2	Pre-mRNA-splicing factor SYF1
ATYEIQFGHL	Q	Q	10	2	0.9998	1	0			sp|Q91W89|MA2C1_MOUSE	Q91W89	MA2C1_MOUSE	Man2c1	Alpha-mannosidase 2C1
ATYGGIALL	L	V	9	2	0.7999	1	0			sp|Q78IK2|ATPMK_MOUSE	Q78IK2	ATPMK_MOUSE	Atp5mk	ATP synthase membrane subunit K, mitochondrial
ATYGGIALLVL	L	Y	11	2	0.9913	3	0			sp|Q78IK2|ATPMK_MOUSE	Q78IK2	ATPMK_MOUSE	Atp5mk	ATP synthase membrane subunit K, mitochondrial
ATYIFLQTF	F	A	9	2	0.9997	30	0			sp|Q8K1A5|TM41B_MOUSE	Q8K1A5	TM41B_MOUSE	Tmem41b	Transmembrane protein 41B
ATYIFNGL	N	T	8	2	0.9779	3	0			sp|Q9QXK3|COPG2_MOUSE	Q9QXK3	COPG2_MOUSE	Copg2	Coatomer subunit gamma-2
ATYPYQVV	A	R	8	2	0.9887	2	0			sp|Q8BMG8|MFTC_MOUSE	Q8BMG8	MFTC_MOUSE	Slc25a32	Mitochondrial folate transporter/carrier
ATYQFHPNL	P	D	9	2	0.8739	1	0			sp|Q80XQ2|TBCD5_MOUSE	Q80XQ2	TBCD5_MOUSE	Tbc1d5	TBC1 domain family member 5
ATYRYPPGI	G	V	9	2	0.9899	2	0			sp|P56546|CTBP2_MOUSE	P56546	CTBP2_MOUSE	Ctbp2	C-terminal-binding protein 2
ATYSYKEAL	L	K	9	2	0.9995	11	0			sp|Q8R349|CDC16_MOUSE	Q8R349	CDC16_MOUSE	Cdc16	Cell division cycle protein 16 homolog
ATYTFIQQL	V	C	9	2	0.9962	12	0			sp|Q9R0N0|GALK1_MOUSE	Q9R0N0	GALK1_MOUSE	Galk1	Galactokinase
ATYVFLKA	K	A	8	2	0.9982	1	0			sp|Q8BYY4|TT39B_MOUSE	Q8BYY4	TT39B_MOUSE	Ttc39b	Tetratricopeptide repeat protein 39B
ATYYFTTF	H	S	8	2	0.9479	1	0			sp|Q8BL99|DOP1_MOUSE	Q8BL99	DOP1_MOUSE	Dop1a	Protein dopey-1
AVAKFTGI	D	N	8	2	0.9908	2	0			sp|Q9ESV0|DDX24_MOUSE	Q9ESV0	DDX24_MOUSE	Ddx24	ATP-dependent RNA helicase DDX24
AVAQLEGRL	Q	-	9	2	0.9834	2	0			sp|Q9JLI6|SCLY_MOUSE	Q9JLI6	SCLY_MOUSE	Scly	Selenocysteine lyase
AVCGSVSTQSL	M	L	11	2	0.8322	1	0			sp|P12023|A4_MOUSE	P12023	A4_MOUSE	App	Amyloid-beta precursor protein
AVDRFQTL	G	K	8	2	0.9976	1	0			sp|Q9WVJ2|PSD13_MOUSE	Q9WVJ2	PSD13_MOUSE	Psmd13	26S proteasome non-ATPase regulatory subunit 13
AVEHINK	Q	T	7	2	0.9605	1	0			sp|P17182|ENOA_MOUSE	P17182	ENOA_MOUSE	Eno1	Alpha-enolase	Eno3	sp|P21550|ENOB_MOUSE
AVFARVAF	Q	N	8	2	0.8167	3	0			sp|Q8VI24|SATB2_MOUSE	Q8VI24	SATB2_MOUSE	Satb2	DNA-binding protein SATB2	Satb1	sp|Q60611|SATB1_MOUSE
AVFGFTSV	Y	V	8	2	0.9605	3	0			sp|P58749|TM6S1_MOUSE	P58749	TM6S1_MOUSE	Tm6sf1	Transmembrane 6 superfamily member 1
AVFKFVQSI	F	C	9	2	0.978	1	0			sp|Q8BJ51|MFS11_MOUSE	Q8BJ51	MFS11_MOUSE	Mfsd11	UNC93-like protein MFSD11
AVFNALVTF	S	C	9	2	0.9186	1	0			sp|Q9WV70|NOC2L_MOUSE	Q9WV70	NOC2L_MOUSE	Noc2l	Nucleolar complex protein 2 homolog
AVFPFIGL	V	G	8	2	0.9871	11	0			sp|Q9DC37|MFSD1_MOUSE	Q9DC37	MFSD1_MOUSE	Mfsd1	Major facilitator superfamily domain-containing protein 1
AVFPSIVGR	R	P	9	2	0.9364	2	0			sp|P60710|ACTB_MOUSE	P60710	ACTB_MOUSE	Actb	Actin, cytoplasmic 1	Acta1, Acta2, Actc1, Actg1, Actg2	sp|P62737|ACTA_MOUSE, sp|P63260|ACTG_MOUSE, sp|P63268|ACTH_MOUSE, sp|P68033|ACTC_MOUSE, sp|P68134|ACTS_MOUSE
AVFPSIVGRPR	R	H	11	3	0.9737	3	0			sp|P60710|ACTB_MOUSE	P60710	ACTB_MOUSE	Actb	Actin, cytoplasmic 1	Acta1, Acta2, Actc1, Actg1, Actg2	sp|P62737|ACTA_MOUSE, sp|P63260|ACTG_MOUSE, sp|P63268|ACTH_MOUSE, sp|P68033|ACTC_MOUSE, sp|P68134|ACTS_MOUSE
AVFQYRLV	H	E	8	2	0.9462	1	0			sp|Q8BIZ6|SNIP1_MOUSE	Q8BIZ6	SNIP1_MOUSE	Snip1	Smad nuclear-interacting protein 1
AVFRFKVL	L	I	8	2	0.9335	1	0			sp|Q9DCI3|STR3N_MOUSE	Q9DCI3	STR3N_MOUSE	Stard3nl	STARD3 N-terminal-like protein
AVFSEVTNF	D	K	9	2	0.9913	2	0			sp|A6H8H2|DEN4C_MOUSE	A6H8H2	DEN4C_MOUSE	Dennd4c	DENN domain-containing protein 4C
AVFSKLVTM	P	L	9	2	0.8528	1	0	9M(15.9949)		sp|P53349|M3K1_MOUSE	P53349	M3K1_MOUSE	Map3k1	Mitogen-activated protein kinase kinase kinase 1
AVFTFEQL	N	L	8	2	0.9983	22	0			sp|Q3UW53|NIBA1_MOUSE	Q3UW53	NIBA1_MOUSE	Niban1	Protein Niban 1
AVFTFEQLL	N	S	9	2	0.9919	3	0			sp|Q3UW53|NIBA1_MOUSE	Q3UW53	NIBA1_MOUSE	Niban1	Protein Niban 1
AVFTWTNL	C	L	8	2	0.9977	20	0			sp|Q8BWT5|DIP2A_MOUSE	Q8BWT5	DIP2A_MOUSE	Dip2a	Disco-interacting protein 2 homolog A	Dip2b	sp|Q3UH60|DIP2B_MOUSE
AVFVNGKEM	G	T	9	2	0.9984	2	0	9M(15.9949)		sp|Q9Z2L7|CRLF3_MOUSE	Q9Z2L7	CRLF3_MOUSE	Crlf3	Cytokine receptor-like factor 3
AVGANTIFL	L	T	9	2	0.9552	1	0			sp|Q3TWN3|CNNM2_MOUSE	Q3TWN3	CNNM2_MOUSE	Cnnm2	Metal transporter CNNM2
AVGNHDFI	Y	E	8	2	0.9046	1	0			sp|Q8BFV2|PCID2_MOUSE	Q8BFV2	PCID2_MOUSE	Pcid2	PCI domain-containing protein 2
AVGNHVAKL	A	L	9	2	0.8068	1	0			sp|Q8VBW6|ULA1_MOUSE	Q8VBW6	ULA1_MOUSE	Nae1	NEDD8-activating enzyme E1 regulatory subunit
AVGQGQGQGFTV	D	N	12	2	0.774	1	0	4Q(0.9840)		sp|Q6P3E7|HDA10_MOUSE	Q6P3E7	HDA10_MOUSE	Hdac10	Polyamine deacetylase HDAC10
AVGRNTLLI	H	A	9	2	0.9966	2	0			sp|O54734|OST48_MOUSE	O54734	OST48_MOUSE	Ddost	Dolichyl-diphosphooligosaccharide--protein glycosyltransferase 48 kDa subunit
AVGSGSRGL	S	P	9	2	0.8289	1	0			sp|Q8CIP4|MARK4_MOUSE	Q8CIP4	MARK4_MOUSE	Mark4	MAP/microtubule affinity-regulating kinase 4
AVIAHVGM	F	A	8	2	0.9407	1	0	8M(15.9949)		sp|Q9WTV6|UBP18_MOUSE	Q9WTV6	UBP18_MOUSE	Usp18	Ubl carboxyl-terminal hydrolase 18
AVIDFSEAHL	G	A	10	2	0.9805	2	0			sp|P0CB42|ALKB1_MOUSE	P0CB42	ALKB1_MOUSE	Alkbh1	Nucleic acid dioxygenase ALKBH1
AVIENLKYFL	F	L	10	2	0.9999	12	0			sp|Q9JMG2|C1GLC_MOUSE	Q9JMG2	C1GLC_MOUSE	C1galt1c1	C1GALT1-specific chaperone 1
AVIHFAGL	K	K	8	2	0.9843	2	0			sp|Q8R059|GALE_MOUSE	Q8R059	GALE_MOUSE	Gale	UDP-glucose 4-epimerase
AVIKFLEL	S	L	8	2	0.9964	19	0			sp|P43247|MSH2_MOUSE	P43247	MSH2_MOUSE	Msh2	DNA mismatch repair protein Msh2
AVIKGLTYL	I	R	9	2	0.9718	1	0			sp|P31938|MP2K1_MOUSE	P31938	MP2K1_MOUSE	Map2k1	Dual specificity mitogen-activated protein kinase kinase 1
AVILLPRL	L	L	8	2	0.9785	3	0			sp|Q8CII9|CRLF2_MOUSE	Q8CII9	CRLF2_MOUSE	Crlf2	Cytokine receptor-like factor 2
AVIQNVTGQNI	T	I	11	2	0.9994	1	0			sp|Q6PIJ4|NFRKB_MOUSE	Q6PIJ4	NFRKB_MOUSE	Nfrkb	Nuclear factor related to kappa-B-binding protein
AVIRNINDQVL	T	F	11	2	0.8587	1	0			sp|P70380|IL18_MOUSE	P70380	IL18_MOUSE	Il18	Interleukin-18
AVIRNNTLM	D	G	9	2	0.9575	2	0	9M(15.9949)		sp|Q80XR2|AT2C1_MOUSE	Q80XR2	AT2C1_MOUSE	Atp2c1	Calcium-transporting ATPase type 2C member 1
AVKFHNL	A	N	7	2	0.9238	4	0			sp|Q64521|GPDM_MOUSE	Q64521	GPDM_MOUSE	Gpd2	Glycerol-3-phosphate dehydrogenase, mitochondrial
AVKNGDYI	D	A	8	2	0.9832	2	0			sp|Q3TYA6|MPP8_MOUSE	Q3TYA6	MPP8_MOUSE	Mphosph8	M-phase phosphoprotein 8
AVLALRNL	E	A	8	2	0.9288	1	0			sp|E9PVA8|GCN1_MOUSE	E9PVA8	GCN1_MOUSE	Gcn1	eIF-2-alpha kinase activator GCN1
AVLAPYARL	Q	P	9	2	0.8482	1	0			sp|Q8K4K2|TRIB3_MOUSE	Q8K4K2	TRIB3_MOUSE	Trib3	Tribbles homolog 3
AVLDFISSL	L	G	9	2	0.9722	2	0			sp|Q3TQQ9|CA112_MOUSE	Q3TQQ9	CA112_MOUSE		Uncharacterized protein C1orf112 homolog
AVLERMEQM	D	L	9	2	0.9653	1	0	6M(15.9949), 9M(15.9949)		sp|Q8C754|VPS52_MOUSE	Q8C754	VPS52_MOUSE	Vps52	Vacuolar protein sorting-associated protein 52 homolog
AVLEVVHEL	A	L	9	2	0.9851	1	0			sp|A0A7N9VSG0|SPA5L_MOUSE	A0A7N9VSG0	SPA5L_MOUSE	Spata5l1	Ribosome biogenesis protein SPATA5L1
AVLFNDGTHM	V	A	10	2	0.9878	1	0	10M(15.9949)		sp|Q60806|PLK3_MOUSE	Q60806	PLK3_MOUSE	Plk3	Serine/threonine-protein kinase PLK3
AVLKYENNV	A	M	9	2	0.981	2	0			sp|P48453|PP2BB_MOUSE	P48453	PP2BB_MOUSE	Ppp3cb	Serine/threonine-protein phosphatase 2B catalytic subunit beta isoform	Ppp3ca, Ppp3cc	sp|P48455|PP2BC_MOUSE, sp|P63328|PP2BA_MOUSE
AVLKYYKV	L	D	8	2	0.9957	4	0			sp|P62983|RS27A_MOUSE	P62983	RS27A_MOUSE	Rps27a	Ubiquitin-40S ribosomal protein S27a
AVLNFTAL	L	L	8	2	0.9897	5	0			sp|Q7TMY8|HUWE1_MOUSE	Q7TMY8	HUWE1_MOUSE	Huwe1	E3 ubiquitin-protein ligase HUWE1
AVLQFLTSL	T	F	9	2	0.9593	1	0			sp|P98192|GNPAT_MOUSE	P98192	GNPAT_MOUSE	Gnpat	Dihydroxyacetone phosphate acyltransferase
AVLRFESV	F	I	8	2	0.9904	3	0			sp|P46978|STT3A_MOUSE	P46978	STT3A_MOUSE	Stt3a	Dolichyl-diphosphooligosaccharide--protein glycosyltransferase subunit STT3A
AVLRQYNI	A	P	8	2	0.9672	1	0			sp|O08579|EMD_MOUSE	O08579	EMD_MOUSE	Emd	Emerin
AVLRYTKL	C	T	8	2	0.9641	2	0			sp|Q9WUK4|RFC2_MOUSE	Q9WUK4	RFC2_MOUSE	Rfc2	Replication factor C subunit 2
AVLSFSTRL	A	F	9	2	0.9994	38	0			sp|P46978|STT3A_MOUSE	P46978	STT3A_MOUSE	Stt3a	Dolichyl-diphosphooligosaccharide--protein glycosyltransferase subunit STT3A
AVLSLYASGRTTGIVM	Q	D	16	2	1	2	0	16M(15.9949)		sp|P60710|ACTB_MOUSE	P60710	ACTB_MOUSE	Actb	Actin, cytoplasmic 1	Actbl2, Actg1	sp|P63260|ACTG_MOUSE, sp|Q8BFZ3|ACTBL_MOUSE
AVLTNPETL	D	R	9	2	0.9998	7	0			sp|Q9R0E1|PLOD3_MOUSE	Q9R0E1	PLOD3_MOUSE	Plod3	Multifunctional procollagen lysine hydroxylase and glycosyltransferase LH3
AVLTNQETI	C	T	9	2	0.9984	15	0			sp|Q3UGY8|BIG3_MOUSE	Q3UGY8	BIG3_MOUSE	Arfgef3	Brefeldin A-inhibited guanine nucleotide-exchange protein 3
AVLTPSMEHTM	G	S	11	2	0.9978	3	0	11M(15.9949), 7M(15.9949)		sp|Q91W59|RBMS1_MOUSE	Q91W59	RBMS1_MOUSE	Rbms1	RNA-binding motif, single-stranded-interacting protein 1
AVMALQEASEA	S	Y	11	2	0.9997	3	0	3M(15.9949)		sp|P84228|H32_MOUSE	P84228	H32_MOUSE	H3c15	Histone H3.2
AVMEVQNL	A	R	8	2	0.955	2	0	3M(15.9949)		sp|Q9CYV5|TM135_MOUSE	Q9CYV5	TM135_MOUSE	Tmem135	Transmembrane protein 135
AVMQGANVL	L	V	9	2	0.993	1	0	3M(15.9949)		sp|Q9DCP9|DAZP2_MOUSE	Q9DCP9	DAZP2_MOUSE	Dazap2	DAZ-associated protein 2
AVNMNLHYV	S	E	9	2	0.9992	2	0	4M(15.9949)		sp|P70700|RPA2_MOUSE	P70700	RPA2_MOUSE	Polr1b	DNA-directed RNA polymerase I subunit RPA2
AVNMVPFPRL	L	H	10	2	0.9725	2	0	4M(15.9949)		sp|P68372|TBB4B_MOUSE	P68372	TBB4B_MOUSE	Tubb4b	Tubulin beta-4B chain	Tubb1, Tubb2a, Tubb2b, Tubb3, Tubb4a, Tubb5, Tubb6	sp|A2AQ07|TBB1_MOUSE, sp|P99024|TBB5_MOUSE, sp|Q7TMM9|TBB2A_MOUSE, sp|Q922F4|TBB6_MOUSE, sp|Q9CWF2|TBB2B_MOUSE, sp|Q9D6F9|TBB4A_MOUSE, sp|Q9ERD7|TBB3_MOUSE
AVNRLVNL	A	H	8	2	0.9678	1	0			sp|P29391|FRIL1_MOUSE	P29391	FRIL1_MOUSE	Ftl1	Ferritin light chain 1	Ftl2	sp|P49945|FRIL2_MOUSE
AVPEFQGL	A	G	8	2	0.9759	8	0			sp|Q9QZE5|COPG1_MOUSE	Q9QZE5	COPG1_MOUSE	Copg1	Coatomer subunit gamma-1
AVPGALGPLTL	P	T	11	2	0.7548	1	0			sp|Q8BHD7|PTBP3_MOUSE	Q8BHD7	PTBP3_MOUSE	Ptbp3	Polypyrimidine tract-binding protein 3
AVPIFIEL	G	L	8	2	0.986	16	0			sp|Q60960|IMA5_MOUSE	Q60960	IMA5_MOUSE	Kpna1	Importin subunit alpha-5	Kpna6	sp|O35345|IMA7_MOUSE
AVPIFVAL	L	S	8	2	0.9862	9	0			sp|Q9WTR6|XCT_MOUSE	Q9WTR6	XCT_MOUSE	Slc7a11	Cystine/glutamate transporter
AVPLFSKNV	Q	H	9	2	0.9944	2	0			sp|O35841|API5_MOUSE	O35841	API5_MOUSE	Api5	Apoptosis inhibitor 5
AVPVFKTL	E	P	8	2	0.9288	2	0			sp|Q8K2G4|BBS7_MOUSE	Q8K2G4	BBS7_MOUSE	Bbs7	Bardet-Biedl syndrome 7 protein homolog
AVPYFSNL	T	V	8	2	0.9812	1	0			sp|Q80U30|CL16A_MOUSE	Q80U30	CL16A_MOUSE	Clec16a	Protein CLEC16A
AVQEFQNQM	T	K	9	2	0.9996	4	0	9M(15.9949)		sp|Q921T2|TOIP1_MOUSE	Q921T2	TOIP1_MOUSE	Tor1aip1	Torsin-1A-interacting protein 1
AVQNHNTYM	R	H	9	2	1	2	0	9M(15.9949)		sp|Q61549|AGRE1_MOUSE	Q61549	AGRE1_MOUSE	Adgre1	Adhesion G protein-coupled receptor E1
AVQNIAHL	G	L	8	2	0.9922	2	0			sp|Q9DBR3|ARMC8_MOUSE	Q9DBR3	ARMC8_MOUSE	Armc8	Armadillo repeat-containing protein 8
AVQTFSYL	E	C	8	2	0.9986	6	0			sp|Q8BKC5|IPO5_MOUSE	Q8BKC5	IPO5_MOUSE	Ipo5	Importin-5
AVRGKLGELVDGLVVP	Q	S	16	4	0.7302	1	0			sp|Q8C754|VPS52_MOUSE	Q8C754	VPS52_MOUSE	Vps52	Vacuolar protein sorting-associated protein 52 homolog
AVSNKYEL	N	E	8	2	0.9896	8	0			sp|P21604|E2_VACCW	P21604	E2_VACCW	VACWR058	Protein E2
AVSNNYIQTL	S	G	10	2	0.9945	2	0			sp|P30999|CTND1_MOUSE	P30999	CTND1_MOUSE	Ctnnd1	Catenin delta-1
AVSTFVNRM	N	K	9	2	0.9989	4	0	9M(15.9949)		sp|Q99LI8|HGS_MOUSE	Q99LI8	HGS_MOUSE	Hgs	Hepatocyte growth factor-regulated tyrosine kinase substrate
AVTGATLPVYQEL	F	R	13	2	0.9772	1	0			sp|P26011|ITB7_MOUSE	P26011	ITB7_MOUSE	Itgb7	Integrin beta-7
AVTGHIRI	A	R	8	2	0.9379	2	0			sp|Q9JIF7|COPB_MOUSE	Q9JIF7	COPB_MOUSE	Copb1	Coatomer subunit beta
AVTTFEAL	S	K	8	2	0.9463	2	0			sp|Q6PDX6|RN220_MOUSE	Q6PDX6	RN220_MOUSE	Rnf220	E3 ubiquitin-protein ligase Rnf220
AVTVNKATM	R	K	9	2	0.9817	2	0	9M(15.9949)		sp|Q8BQZ4|RLGPB_MOUSE	Q8BQZ4	RLGPB_MOUSE	Ralgapb	Ral GTPase-activating protein subunit beta
AVVAFVMKM	G	R	9	2	0.9998	23	0	7M(15.9949), 9M(15.9949)		sp|P01901|HA1B_MOUSE	P01901	HA1B_MOUSE	H2-K1	H-2 class I histocompatibility antigen, K-B alpha chain		sp|P01902|HA1D_MOUSE, sp|P04223|HA1K_MOUSE
AVVANSFFI	D	M	9	2	0.9996	6	0			sp|A2AN08|UBR4_MOUSE	A2AN08	UBR4_MOUSE	Ubr4	E3 ubiquitin-protein ligase UBR4
AVVANVQHV	H	L	9	2	0.9935	1	0			sp|Q8CEE0|CEP57_MOUSE	Q8CEE0	CEP57_MOUSE	Cep57	Centrosomal protein of 57 kDa
AVVDFEAL	S	N	8	2	0.9937	2	0			sp|Q6PR54|RIF1_MOUSE	Q6PR54	RIF1_MOUSE	Rif1	Telomere-associated protein RIF1
AVVEFLTSV	D	H	9	2	0.9754	2	0			sp|Q5HZJ0|RNC_MOUSE	Q5HZJ0	RNC_MOUSE	Drosha	Ribonuclease 3
AVVEFQRA	A	Q	8	2	0.7482	1	0			sp|Q8BG32|PSD11_MOUSE	Q8BG32	PSD11_MOUSE	Psmd11	26S proteasome non-ATPase regulatory subunit 11
AVVEFSRNV	L	L	9	2	0.9944	5	0			sp|P70698|PYRG1_MOUSE	P70698	PYRG1_MOUSE	Ctps1	CTP synthase 1
AVVELVTV	N	K	8	2	0.9895	10	0			sp|Q9CYN9|RENR_MOUSE	Q9CYN9	RENR_MOUSE	Atp6ap2	Renin receptor
AVVLFETATL	L	R	10	2	0.9984	2	0			sp|P08113|ENPL_MOUSE	P08113	ENPL_MOUSE	Hsp90b1	Endoplasmin
AVVLNATWL	Y	V	9	2	0.9981	7	0			sp|P13011|SCD2_MOUSE	P13011	SCD2_MOUSE	Scd2	Stearoyl-CoA desaturase 2	Scd3	sp|Q99PL7|SCD3_MOUSE
AVVNVTYM	T	T	8	2	0.9992	4	0	8M(15.9949)		sp|Q5SF07|IF2B2_MOUSE	Q5SF07	IF2B2_MOUSE	Igf2bp2	Insulin-like growth factor 2 mRNA-binding protein 2
AVVPLVGKL	G	K	9	2	0.9041	1	0			sp|Q921M7|CYRIB_MOUSE	Q921M7	CYRIB_MOUSE	Cyrib	CYFIP-related Rac1 interactor B
AVVRLDNL	S	M	8	2	0.9886	1	0			sp|Q8BH75|RNF41_MOUSE	Q8BH75	RNF41_MOUSE	Rnf41	E3 ubiquitin-protein ligase NRDP1
AVVSFKEL	N	C	8	2	0.9892	3	0			sp|Q8K394|PLCL2_MOUSE	Q8K394	PLCL2_MOUSE	Plcl2	Inactive phospholipase C-like protein 2
AVVTFYDV	A	Y	8	2	0.9438	1	0			sp|Q9DA39|LFG4_MOUSE	Q9DA39	LFG4_MOUSE	Tmbim4	Protein lifeguard 4
AVVTNAMII	L	A	9	2	0.9758	2	0	7M(15.9949)		sp|Q6P9J9|ANO6_MOUSE	Q6P9J9	ANO6_MOUSE	Ano6	Anoctamin-6
AVVVNAAQL	R	A	9	2	0.9943	4	0			sp|Q9CR62|M2OM_MOUSE	Q9CR62	M2OM_MOUSE	Slc25a11	Mitochondrial 2-oxoglutarate/malate carrier protein
AVVVYGRL	M	T	8	2	0.9789	1	0			sp|O35368|IFI3_MOUSE	O35368	IFI3_MOUSE	Ifi203	Interferon-activable protein 203
AVWNFGAVGM	L	V	10	2	0.9852	1	0	10M(15.9949)		sp|Q61144|PSN2_MOUSE	Q61144	PSN2_MOUSE	Psen2	Presenilin-2
AVYAFLGL	N	T	8	2	0.9835	31	0			sp|Q9JJU8|SH3L1_MOUSE	Q9JJU8	SH3L1_MOUSE	Sh3bgrl	Adapter Sh3bgrl
AVYIFHGA	G	S	8	2	0.9587	1	0			sp|Q9QXH4|ITAX_MOUSE	Q9QXH4	ITAX_MOUSE	Itgax	Integrin alpha-X	Itgad	sp|Q3V0T4|ITAD_MOUSE
AVYIFYGA	G	S	8	2	0.9928	8	0			sp|P05555|ITAM_MOUSE	P05555	ITAM_MOUSE	Itgam	Integrin alpha-M
AVYIFYGASI	G	A	10	2	0.9846	1	0			sp|P05555|ITAM_MOUSE	P05555	ITAM_MOUSE	Itgam	Integrin alpha-M
AVYLFAFA	A	S	8	2	0.9813	1	0			sp|Q8C3X8|LMF2_MOUSE	Q8C3X8	LMF2_MOUSE	Lmf2	Lipase maturation factor 2
AVYNFTRQGA	P	G	10	2	0.9975	1	0			sp|Q5SUA5|MYO1G_MOUSE	Q5SUA5	MYO1G_MOUSE	Myo1g	Unconventional myosin-Ig
AVYNFTRQGAGL	P	N	12	2	0.9764	1	0			sp|Q5SUA5|MYO1G_MOUSE	Q5SUA5	MYO1G_MOUSE	Myo1g	Unconventional myosin-Ig
AVYNFTRQGAGLNM	P	G	14	2	0.9999	1	0	14M(15.9949)		sp|Q5SUA5|MYO1G_MOUSE	Q5SUA5	MYO1G_MOUSE	Myo1g	Unconventional myosin-Ig
AVYQFGSAL	V	A	9	2	0.9994	6	0			sp|Q80ZE4|PAQR7_MOUSE	Q80ZE4	PAQR7_MOUSE	Paqr7	Membrane progestin receptor alpha
AVYRMTYV	V	G	8	2	0.9607	1	0	5M(15.9949)		sp|Q920R0|ALS2_MOUSE	Q920R0	ALS2_MOUSE	Als2	Alsin
AVYSFDPVGSY	G	Q	11	2	0.9999	2	0			sp|O09061|PSB1_MOUSE	O09061	PSB1_MOUSE	Psmb1	Proteasome subunit beta type-1
AVYSFEAL	S	V	8	2	0.9982	29	0			sp|Q99KC8|VMA5A_MOUSE	Q99KC8	VMA5A_MOUSE	Vwa5a	von Willebrand factor A domain-containing protein 5A
AVYSLGRL	L	V	8	2	0.9454	2	0			sp|O54885|TYOBP_MOUSE	O54885	TYOBP_MOUSE	Tyrobp	TYRO protein tyrosine kinase-binding protein
AVYTFETL	N	L	8	2	0.9991	44	0			sp|Q8R1F1|NIBA2_MOUSE	Q8R1F1	NIBA2_MOUSE	Niban2	Protein Niban 2
AVYTFETLL	N	H	9	2	0.9985	44	0			sp|Q8R1F1|NIBA2_MOUSE	Q8R1F1	NIBA2_MOUSE	Niban2	Protein Niban 2
AVYTFETLLH	N	Q	10	2	0.9971	2	0			sp|Q8R1F1|NIBA2_MOUSE	Q8R1F1	NIBA2_MOUSE	Niban2	Protein Niban 2
AVYTYLRL	M	I	8	2	0.9962	2	0			sp|Q7TPD0|INT3_MOUSE	Q7TPD0	INT3_MOUSE	Ints3	Integrator complex subunit 3
AWIHAAHV	A	K	8	2	0.9995	1	0			sp|P10400|POL1_MOUSE	P10400	POL1_MOUSE	Pol	Retrovirus-related Pol polyprotein (Fragment)
AWIKVEQL	H	K	8	2	0.996	11	0			sp|Q922P9|GLYR1_MOUSE	Q922P9	GLYR1_MOUSE	Glyr1	Cytokine-like nuclear factor N-PAC
AWISSILL	T	A	8	2	0.9749	3	0			sp|P57787|MOT4_MOUSE	P57787	MOT4_MOUSE	Slc16a3	Monocarboxylate transporter 4
AWLQVSPV	A	I	8	2	0.9952	7	0			sp|Q8BXN9|TM87A_MOUSE	Q8BXN9	TM87A_MOUSE	Tmem87a	Transmembrane protein 87A
AWLRAIGL	G	E	8	2	0.8767	1	0			sp|Q6P549|SHIP2_MOUSE	Q6P549	SHIP2_MOUSE	Inppl1	Phosphatidylinositol 3,4,5-trisphosphate 5-phosphatase 2
AWNADDCALH	A	G	10	2	0.9278	1	0			sp|Q3TBN1|TM248_MOUSE	Q3TBN1	TM248_MOUSE	Tmem248	Transmembrane protein 248
AWNIAPQGL	L	Q	9	2	0.8304	1	0			sp|Q8BNQ3|G137B_MOUSE	Q8BNQ3	G137B_MOUSE	Gpr137b	Integral membrane protein GPR137B
AWVKIENL	E	A	8	2	0.9927	3	0			sp|Q60996|2A5G_MOUSE	Q60996	2A5G_MOUSE	Ppp2r5c	Serine/threonine-protein phosphatase 2A 56 kDa regulatory subunit gamma isoform
AWYQKQELL	E	R	9	2	0.9912	1	0			sp|Q6NXY1|TBC31_MOUSE	Q6NXY1	TBC31_MOUSE	Tbc1d31	TBC1 domain family member 31
AYEFAKL	T	N	7	2	0.9871	3	0			sp|Q9EQ06|DHB11_MOUSE	Q9EQ06	DHB11_MOUSE	Hsd17b11	Estradiol 17-beta-dehydrogenase 11
AYEFTTL	A	T	7	2	0.9977	6	0			sp|P32233|DRG1_MOUSE	P32233	DRG1_MOUSE	Drg1	Developmentally-regulated GTP-binding protein 1
AYFGTGFPHM	G	L	10	2	0.9846	2	0	10M(15.9949)		sp|P67871|CSK2B_MOUSE	P67871	CSK2B_MOUSE	Csnk2b	Casein kinase II subunit beta
AYFQRGMLY	V	Y	9	2	0.8525	1	0	4Q(0.9840)		sp|O70145|NCF2_MOUSE	O70145	NCF2_MOUSE	Ncf2	Neutrophil cytosol factor 2
AYFTHSNL	A	Q	8	2	0.9996	8	0			sp|Q8CIE6|COPA_MOUSE	Q8CIE6	COPA_MOUSE	Copa	Coatomer subunit alpha
AYGSGPARGP	E	V	10	2	0.969	1	0			sp|Q8BX46|SKOR1_MOUSE	Q8BX46	SKOR1_MOUSE	Skor1	SKI family transcriptional corepressor 1
AYKFGKTV	I	V	8	2	0.9826	2	0			sp|Q8R3Q0|SARAF_MOUSE	Q8R3Q0	SARAF_MOUSE	Saraf	Store-operated calcium entry-associated regulatory factor
AYKFPNL	N	R	7	2	0.9973	2	0			sp|O54754|AOXA_MOUSE	O54754	AOXA_MOUSE	Aox1	Aldehyde oxidase 1
AYLFAHV	R	A	7	2	0.9781	1	0			sp|Q5SWD9|TSR1_MOUSE	Q5SWD9	TSR1_MOUSE	Tsr1	Pre-rRNA-processing protein TSR1 homolog
AYLPQQLPHL	M	S	10	2	0.9972	1	0			sp|Q6T264|MAML1_MOUSE	Q6T264	MAML1_MOUSE	Maml1	Mastermind-like protein 1
AYLPQYTHM	G	Q	9	2	0.7885	1	0	9M(15.9949)		sp|Q91W59|RBMS1_MOUSE	Q91W59	RBMS1_MOUSE	Rbms1	RNA-binding motif, single-stranded-interacting protein 1
AYLYVRSL	S	R	8	2	0.7338	1	0			sp|Q3U9G9|LBR_MOUSE	Q3U9G9	LBR_MOUSE	Lbr	Delta(14)-sterol reductase LBR
AYPDLENPPLI	A	V	11	2	0.9906	1	0			sp|Q9D0I9|SYRC_MOUSE	Q9D0I9	SYRC_MOUSE	Rars1	Arginine--tRNA ligase, cytoplasmic
AYPTYGQQPTA	P	T	11	2	0.9966	3	0			sp|Q61545|EWS_MOUSE	Q61545	EWS_MOUSE	Ewsr1	RNA-binding protein EWS
AYQHLFYL	E	L	8	2	0.9901	6	0			sp|Q9JKF1|IQGA1_MOUSE	Q9JKF1	IQGA1_MOUSE	Iqgap1	Ras GTPase-activating-like protein IQGAP1
AYRFTGL	E	S	7	2	0.9848	1	0			sp|Q8K015|CENPO_MOUSE	Q8K015	CENPO_MOUSE	Cenpo	Centromere protein O
CAYGFFANL	L	R	9	2	0.9597	1	0			sp|Q9EQN9|S19A2_MOUSE	Q9EQN9	S19A2_MOUSE	Slc19a2	Thiamine transporter 1
CEQCGEYLP	C	S	9	2	0.8681	1	0			sp|Q9CU65|ZMYM2_MOUSE	Q9CU65	ZMYM2_MOUSE	Zmym2	Zinc finger MYM-type protein 2
CGLSQDGFLL	P	N	10	2	0.8043	1	0			sp|Q5XJV7|SETD5_MOUSE	Q5XJV7	SETD5_MOUSE	Setd5	Histone-lysine N-methyltransferase SETD5
CMGFSDPATI	L	R	10	2	0.7382	1	0	2M(15.9949)		sp|B1AY13|UBP24_MOUSE	B1AY13	UBP24_MOUSE	Usp24	Ubiquitin carboxyl-terminal hydrolase 24
CNCYMEAL	S	A	8	2	0.9226	1	0	5M(15.9949)		sp|Q8BTX9|HSDL1_MOUSE	Q8BTX9	HSDL1_MOUSE	Hsdl1	Inactive hydroxysteroid dehydrogenase-like protein 1
CSSLSESATASLGM	V	L	14	2	0.7628	1	0	14M(15.9949)		sp|G5E8F4|FPGT_MOUSE	G5E8F4	FPGT_MOUSE	Fpgt	Fucose-1-phosphate guanylyltransferase
CYGVDGESDSIM	G	S	12	3	0.7941	1	0	12M(15.9949)		sp|Q9D4H9|PHF14_MOUSE	Q9D4H9	PHF14_MOUSE	Phf14	PHD finger protein 14
DAASYYAPVR	L	-	10	2	0.9976	16	0			iRT-pepG	iRT-pepG	iRT-pepG		iRT-pepG
DAFRFENV	P	N	8	2	0.9954	1	0			sp|Q61024|ASNS_MOUSE	Q61024	ASNS_MOUSE	Asns	Asparagine synthetase [glutamine-hydrolyzing]
DAFVFSHL	L	A	8	2	0.9829	2	0			sp|P47802|MTX1_MOUSE	P47802	MTX1_MOUSE	Mtx1	Metaxin-1
DAGTIAGLNVLR	K	I	12	2	1	1	0			sp|P63017|HSP7C_MOUSE	P63017	HSP7C_MOUSE	Hspa8	Heat shock cognate 71 kDa protein
DAIENAVENL	L	D	10	2	0.9725	1	0			sp|Q91Z67|SRGP2_MOUSE	Q91Z67	SRGP2_MOUSE	Srgap2	SLIT-ROBO Rho GTPase-activating protein 2
DAIENRSTV	A	Y	9	2	0.9894	2	0			sp|Q6PGG6|GNL3L_MOUSE	Q6PGG6	GNL3L_MOUSE	Gnl3l	Guanine nucleotide-binding protein-like 3-like protein
DAIHNFDFL	N	K	9	2	0.999	19	0			sp|Q5XF89|AT133_MOUSE	Q5XF89	AT133_MOUSE	Atp13a3	Polyamine-transporting ATPase 13A3
DAILNDVNSAL	C	Q	11	2	0.9928	1	0			sp|Q8CI04|COG3_MOUSE	Q8CI04	COG3_MOUSE	Cog3	Conserved oligomeric Golgi complex subunit 3
DALENLRVYL	K	C	10	2	0.9999	13	0			sp|Q9Z0H7|BCL10_MOUSE	Q9Z0H7	BCL10_MOUSE	Bcl10	B-cell lymphoma/leukemia 10
DALSNVDLL	E	E	9	2	0.9937	11	0			sp|Q7TMB8|CYFP1_MOUSE	Q7TMB8	CYFP1_MOUSE	Cyfip1	Cytoplasmic FMR1-interacting protein 1	Cyfip2	sp|Q5SQX6|CYFP2_MOUSE
DALTNLTVL	L	S	9	2	0.995	9	0			sp|Q3UM45|PP1R7_MOUSE	Q3UM45	PP1R7_MOUSE	Ppp1r7	Protein phosphatase 1 regulatory subunit 7
DAPRNLILI	T	A	9	2	0.8703	2	0			sp|Q8VE38|OXND1_MOUSE	Q8VE38	OXND1_MOUSE	Oxnad1	Oxidoreductase NAD-binding domain-containing protein 1
DAPSPAPDHI	W	R	10	2	0.9929	2	0			sp|Q8K385|FRRS1_MOUSE	Q8K385	FRRS1_MOUSE	FRRS1	Ferric-chelate reductase 1
DAVANLTQL	D	I	9	2	0.965	3	0			sp|O88512|AP1G2_MOUSE	O88512	AP1G2_MOUSE	Ap1g2	AP-1 complex subunit gamma-like 2
DAVKNGDYI	R	A	9	2	0.9981	4	0			sp|Q3TYA6|MPP8_MOUSE	Q3TYA6	MPP8_MOUSE	Mphosph8	M-phase phosphoprotein 8
DAVTYTEH	R	A	8	2	0.9022	2	0			sp|P62806|H4_MOUSE	P62806	H4_MOUSE	H4c16	Histone H4
DAVTYTEHAK	R	R	10	2	0.9022	1	0			sp|P62806|H4_MOUSE	P62806	H4_MOUSE	H4c16	Histone H4
DCPSNGQTL	G	K	9	2	0.9998	7	0			sp|P29477|NOS2_MOUSE	P29477	NOS2_MOUSE	Nos2	Nitric oxide synthase, inducible
DFLSSLPL	S	H	8	2	0.9386	2	0			sp|O54714|PIAS3_MOUSE	O54714	PIAS3_MOUSE	Pias3	E3 SUMO-protein ligase PIAS3
DGDGTITTK	K	E	9	2	0.9989	1	0			sp|P0DP26|CALM1_MOUSE	P0DP26	CALM1_MOUSE	Calm1	Calmodulin-1	Calm2, Calm3	sp|P0DP27|CALM2_MOUSE, sp|P0DP28|CALM3_MOUSE
DGLDAASYYA	-	P	10	2	1	48	0			iRT-pepG	iRT-pepG	iRT-pepG		iRT-pepG
DGLDAASYYAPVR	-	-	13	2, 3	1	224	0			iRT-pepG	iRT-pepG	iRT-pepG		iRT-pepG
DGRGAAQNIIPASTGAAK	R	A	18	3	0.9492	2	0			sp|P16858|G3P_MOUSE	P16858	G3P_MOUSE	Gapdh	Glyceraldehyde-3-phosphate dehydrogenase
DGVANVEHI	A	L	9	2	0.9994	5	0			sp|Q9D020|5NT3A_MOUSE	Q9D020	5NT3A_MOUSE	Nt5c3a	Cytosolic 5'-nucleotidase 3A
DGYAFQNL	T	I	8	2	0.9688	1	0			sp|O55047|TLK2_MOUSE	O55047	TLK2_MOUSE	Tlk2	Serine/threonine-protein kinase tousled-like 2
DGYEYAYL	I	K	8	2	0.9224	1	0			sp|P49117|NR2C2_MOUSE	P49117	NR2C2_MOUSE	Nr2c2	Nuclear receptor subfamily 2 group C member 2
DGYYFTNL	E	C	8	2	0.9879	1	0			sp|Q9JM13|RABX5_MOUSE	Q9JM13	RABX5_MOUSE	Rabgef1	Rab5 GDP/GTP exchange factor
DHIPLPL	L	P	7	2	0.9461	1	0			sp|P70186|EPYC_MOUSE	P70186	EPYC_MOUSE	Epyc	Epiphycan
DIAHTPGVA	Y	A	9	2	0.9911	2	0			sp|P08249|MDHM_MOUSE	P08249	MDHM_MOUSE	Mdh2	Malate dehydrogenase, mitochondrial
DIERPTYTNL	L	N	10	2	0.9862	7	0			sp|P05213|TBA1B_MOUSE	P05213	TBA1B_MOUSE	Tuba1b	Tubulin alpha-1B chain	Tuba1a, Tuba1c, Tuba3b, Tuba4a, Tuba8	sp|P05214|TBA3_MOUSE, sp|P68368|TBA4A_MOUSE, sp|P68369|TBA1A_MOUSE, sp|P68373|TBA1C_MOUSE, sp|Q9JJZ2|TBA8_MOUSE
DIKNLLTACTI	M	F	11	2	0.9999	6	0			sp|P68631|YVAT_VACCW	P68631	YVAT_VACCW	SALFE	Uncharacterized 8.9 kDa protein
DIQMTQSPSSLSASL	C	G	15	2	0.995	1	0	4M(15.9949)		sp|P01639|KV5A7_MOUSE	P01639	KV5A7_MOUSE	Igkv9-120	Immunoglobulin kappa chain variable 9-120		sp|P01641|KV5A8_MOUSE
DIQMTQTTSSL	-	S	11	2	1	16	0	4M(15.9949)		sp|P01644|KV5AB_MOUSE	P01644	KV5AB_MOUSE		Ig kappa chain V-V region HP R16.7		sp|P01643|KV5AA_MOUSE, sp|P01645|KV5AC_MOUSE, sp|P01647|KV5AE_MOUSE, sp|P04946|KV5AM_MOUSE
DIQMTQTTSSLS	-	A	12	2	0.9999	6	0	4M(15.9949)		sp|P01644|KV5AB_MOUSE	P01644	KV5AB_MOUSE		Ig kappa chain V-V region HP R16.7		sp|P01643|KV5AA_MOUSE, sp|P01645|KV5AC_MOUSE, sp|P01647|KV5AE_MOUSE, sp|P04946|KV5AM_MOUSE
DIQMTQTTSSLSA	-	S	13	2	1	17	0	4M(15.9949)		sp|P01644|KV5AB_MOUSE	P01644	KV5AB_MOUSE		Ig kappa chain V-V region HP R16.7		sp|P01643|KV5AA_MOUSE, sp|P01645|KV5AC_MOUSE, sp|P01647|KV5AE_MOUSE, sp|P04946|KV5AM_MOUSE
DIQMTQTTSSLSAS	-	L	14	2	0.9975	2	0	4M(15.9949)		sp|P01644|KV5AB_MOUSE	P01644	KV5AB_MOUSE		Ig kappa chain V-V region HP R16.7		sp|P01643|KV5AA_MOUSE, sp|P01645|KV5AC_MOUSE, sp|P01647|KV5AE_MOUSE, sp|P04946|KV5AM_MOUSE
DIQMTQTTSSLSASL	-	G	15	2	1	23	0	4M(15.9949)		sp|P01644|KV5AB_MOUSE	P01644	KV5AB_MOUSE		Ig kappa chain V-V region HP R16.7		sp|P01643|KV5AA_MOUSE, sp|P01645|KV5AC_MOUSE, sp|P01647|KV5AE_MOUSE, sp|P04946|KV5AM_MOUSE
DIQMTQTTSSLSASLG	-	D	16	2	1	26	0	4M(15.9949)		sp|P01644|KV5AB_MOUSE	P01644	KV5AB_MOUSE		Ig kappa chain V-V region HP R16.7		sp|P01643|KV5AA_MOUSE, sp|P01645|KV5AC_MOUSE, sp|P01647|KV5AE_MOUSE, sp|P04946|KV5AM_MOUSE
DIQMTQTTSSLSASLGD	-	R	17	2, 3	1	535	0	4M(15.9949), 6Q(0.9840)		sp|P01644|KV5AB_MOUSE	P01644	KV5AB_MOUSE		Ig kappa chain V-V region HP R16.7		sp|P01643|KV5AA_MOUSE, sp|P01645|KV5AC_MOUSE, sp|P01647|KV5AE_MOUSE
DIRDLEAI	S	T	8	2	0.7437	1	0			sp|O35350|CAN1_MOUSE	O35350	CAN1_MOUSE	Capn1	Calpain-1 catalytic subunit
DITLTSANHAMI	G	-	12	2, 3	0.9998	14	0	11M(15.9949)		sp|P16110|LEG3_MOUSE	P16110	LEG3_MOUSE	Lgals3	Galectin-3
DIVNFVHTNL	P	R	10	2	0.99	1	0			sp|Q9D8E6|RL4_MOUSE	Q9D8E6	RL4_MOUSE	Rpl4	60S ribosomal protein L4
DIVTIGMLSL	K	P	10	2	0.7291	1	0	7M(15.9949)		sp|Q8BH01|TMCO3_MOUSE	Q8BH01	TMCO3_MOUSE	Tmco3	Transmembrane and coiled-coil domain-containing protein 3
DIYSFSEL	A	P	8	2	0.8942	1	0			sp|Q5NCI0|URGCP_MOUSE	Q5NCI0	URGCP_MOUSE	Urgcp	Up-regulator of cell proliferation
DKLGFPQI	F	L	8	2	0.9587	3	0			sp|P59281|RHG39_MOUSE	P59281	RHG39_MOUSE	Arhgap39	Rho GTPase-activating protein 39
DLEDVCQQMGPM	L	I	12	2	0.7849	1	0	9M(15.9949)		sp|O88811|STAM2_MOUSE	O88811	STAM2_MOUSE	Stam2	Signal transducing adapter molecule 2
DLEGSLEQEK	D	K	10	2	0.9185	1	0			sp|Q91Z83|MYH7_MOUSE	Q91Z83	MYH7_MOUSE	Myh7	Myosin-7	Myh1, Myh4, Myh6, Myh8	sp|P13542|MYH8_MOUSE, sp|Q02566|MYH6_MOUSE, sp|Q5SX39|MYH4_MOUSE, sp|Q5SX40|MYH1_MOUSE
DLFINDPFI	K	K	9	2	0.9991	16	0			sp|P68440|D13_VACCW	P68440	D13_VACCW	VACWR118	Scaffold protein D13
DLFPSFVRL	S	D	9	2	0.9994	17	0			sp|P68609|RP22_VACCW	P68609	RP22_VACCW	RPO22	DNA-directed RNA polymerase 22 kDa subunit
DLGIYANI	E	F	8	2	0.9839	19	0			sp|P21604|E2_VACCW	P21604	E2_VACCW	VACWR058	Protein E2
DLNPNRFPIFAAL	L	L	13	2	0.9996	4	0			sp|Q6A0A9|F120A_MOUSE	Q6A0A9	F120A_MOUSE	FAM120A	Constitutive coactivator of PPAR-gamma-like protein 1
DLTDYLMK	R	I	8	2	0.9775	2	0			sp|P60710|ACTB_MOUSE	P60710	ACTB_MOUSE	Actb	Actin, cytoplasmic 1	Acta1, Acta2, Actbl2, Actc1, Actg1, Actg2	sp|P62737|ACTA_MOUSE, sp|P63260|ACTG_MOUSE, sp|P63268|ACTH_MOUSE, sp|P68033|ACTC_MOUSE, sp|P68134|ACTS_MOUSE, sp|Q8BFZ3|ACTBL_MOUSE
DLTHWVY	G	K	7	2	0.8714	1	0			sp|Q80SW1|SAHH2_MOUSE	Q80SW1	SAHH2_MOUSE	Ahcyl1	S-adenosylhomocysteine hydrolase-like protein 1
DLVPAFQNL	T	M	9	2	0.9784	2	0			sp|Q76MZ3|2AAA_MOUSE	Q76MZ3	2AAA_MOUSE	Ppp2r1a	Serine/threonine-protein phosphatase 2A 65 kDa regulatory subunit A alpha isoform
DMQNVITL	W	D	8	2	0.9286	4	0			sp|P35436|NMDE1_MOUSE	P35436	NMDE1_MOUSE	Grin2a	Glutamate receptor ionotropic, NMDA 2A
DNHSALIYSNL	P	L	11	2	0.9188	1	0			sp|O55013|TPPC3_MOUSE	O55013	TPPC3_MOUSE	Trappc3	Trafficking protein particle complex subunit 3
DNIQGITK	R	P	8	2	0.9983	2	0			sp|P62806|H4_MOUSE	P62806	H4_MOUSE	H4c16	Histone H4
DNNRSLD	M	L	7	2	0.8684	1	0			sp|Q6IFZ6|K2C1B_MOUSE	Q6IFZ6	K2C1B_MOUSE	Krt77	Keratin, type II cytoskeletal 1b	Krt1, Krt5, Krt6a, Krt6b, Krt75	sp|P04104|K2C1_MOUSE, sp|P50446|K2C6A_MOUSE, sp|Q8BGZ7|K2C75_MOUSE, sp|Q922U2|K2C5_MOUSE, sp|Q9Z331|K2C6B_MOUSE
DNNRSLDLD	M	S	9	2	0.8385	2	0			sp|Q6IFZ6|K2C1B_MOUSE	Q6IFZ6	K2C1B_MOUSE	Krt77	Keratin, type II cytoskeletal 1b	Krt1, Krt5, Krt6a, Krt6b, Krt75	sp|P04104|K2C1_MOUSE, sp|P50446|K2C6A_MOUSE, sp|Q8BGZ7|K2C75_MOUSE, sp|Q922U2|K2C5_MOUSE, sp|Q9Z331|K2C6B_MOUSE
DNNRSLDLDSIIA	M	E	13	2	0.9931	3	0			sp|P50446|K2C6A_MOUSE	P50446	K2C6A_MOUSE	Krt6a	Keratin, type II cytoskeletal 6A	Krt5, Krt6b, Krt75	sp|Q8BGZ7|K2C75_MOUSE, sp|Q922U2|K2C5_MOUSE, sp|Q9Z331|K2C6B_MOUSE
DPAIYFKEQFLD	A	G	12	2, 3	0.9999	7	0			sp|P14211|CALR_MOUSE	P14211	CALR_MOUSE	Calr	Calreticulin
DPAIYFKEQFLDGD	A	A	14	2	0.9999	1	0			sp|P14211|CALR_MOUSE	P14211	CALR_MOUSE	Calr	Calreticulin
DPKFEVIDKPQS	D	-	12	3	0.9984	4	0			sp|P97450|ATP5J_MOUSE	P97450	ATP5J_MOUSE	Atp5pf	ATP synthase-coupling factor 6, mitochondrial
DPRFPEIYPSI	R	T	11	2	0.9829	2	0			sp|P53762|ARNT_MOUSE	P53762	ARNT_MOUSE	Arnt	Aryl hydrocarbon receptor nuclear translocator
DQIPKFTI	G	A	8	2	0.7439	1	0			sp|Q60692|PSB6_MOUSE	Q60692	PSB6_MOUSE	Psmb6	Proteasome subunit beta type-6
DQIPVFVTM	T	S	9	2	0.9442	2	0	9M(15.9949)		sp|Q99P91|GPNMB_MOUSE	Q99P91	GPNMB_MOUSE	Gpnmb	Transmembrane glycoprotein NMB
DQIQNAQYL	Q	L	9	2	0.9996	23	0	2Q(0.9840), 7Q(0.9840)		sp|P61979|HNRPK_MOUSE	P61979	HNRPK_MOUSE	Hnrnpk	Heterogeneous nuclear ribonucleoprotein K
DQMKNQEQL	A	A	9	2	0.9407	1	0	3M(15.9949)		sp|P26043|RADI_MOUSE	P26043	RADI_MOUSE	Rdx	Radixin
DQVANSAFVER	K	L	11	2	0.9716	1	0			sp|P07901|HS90A_MOUSE	P07901	HS90A_MOUSE	Hsp90aa1	Heat shock protein HSP 90-alpha
DQVENHEFL	M	V	9	2	0.9966	4	0			sp|P43247|MSH2_MOUSE	P43247	MSH2_MOUSE	Msh2	DNA mismatch repair protein Msh2
DSIANATVL	K	L	9	2	0.9968	2	0			sp|P35922|FMR1_MOUSE	P35922	FMR1_MOUSE	Fmr1	Fragile X messenger ribonucleoprotein 1
DSKETIL	M	I	7	2	0.7321	1	0			sp|P68438|RAP94_VACCW	P68438	RAP94_VACCW	RAP94	RNA polymerase-associated transcription-specificity factor RAP94
DSLLNFETV	V	K	9	2	0.9742	1	0			sp|Q9DC29|ABCB6_MOUSE	Q9DC29	ABCB6_MOUSE	Abcb6	ATP-binding cassette sub-family B member 6
DSLVNQEVL	P	S	9	2	0.9903	2	0			sp|P70700|RPA2_MOUSE	P70700	RPA2_MOUSE	Polr1b	DNA-directed RNA polymerase I subunit RPA2
DSPANIEVL	V	H	9	2	0.9506	2	0			sp|Q923A2|SPDLY_MOUSE	Q923A2	SPDLY_MOUSE	Spdl1	Protein Spindly
DSPSVWAAVPGK	K	T	12	2	0.9954	2	0			sp|P62962|PROF1_MOUSE	P62962	PROF1_MOUSE	Pfn1	Profilin-1
DSRLPFL	A	-	7	2	0.865	1	0			sp|Q3U7U3|FBX7_MOUSE	Q3U7U3	FBX7_MOUSE	Fbxo7	F-box only protein 7
DSYVGDEAQS	K	K	10	2	0.9947	3	0			sp|P60710|ACTB_MOUSE	P60710	ACTB_MOUSE	Actb	Actin, cytoplasmic 1	Acta1, Acta2, Actc1, Actg1, Actg2	sp|P62737|ACTA_MOUSE, sp|P63260|ACTG_MOUSE, sp|P63268|ACTH_MOUSE, sp|P68033|ACTC_MOUSE, sp|P68134|ACTS_MOUSE
DSYVGDEAQSK	K	R	11	2	0.999	2	0			sp|P60710|ACTB_MOUSE	P60710	ACTB_MOUSE	Actb	Actin, cytoplasmic 1	Acta1, Acta2, Actc1, Actg1, Actg2	sp|P62737|ACTA_MOUSE, sp|P63260|ACTG_MOUSE, sp|P63268|ACTH_MOUSE, sp|P68033|ACTC_MOUSE, sp|P68134|ACTS_MOUSE
DTHTNTYYL	Y	R	9	2	0.9667	2	0			sp|P55012|S12A2_MOUSE	P55012	S12A2_MOUSE	Slc12a2	Solute carrier family 12 member 2
DVGPRYTNL	F	S	9	2	0.979	1	0			sp|P63085|MK01_MOUSE	P63085	MK01_MOUSE	Mapk1	Mitogen-activated protein kinase 1
DVIRLIGQHL	E	N	10	2	0.7391	1	0			sp|Q8C6G8|WDR26_MOUSE	Q8C6G8	WDR26_MOUSE	Wdr26	WD repeat-containing protein 26
DVIVNSTTL	A	T	9	2	0.9899	1	0			sp|Q2EMV9|PAR14_MOUSE	Q2EMV9	PAR14_MOUSE	Parp14	Protein mono-ADP-ribosyltransferase PARP14
DVLEFNQV	L	V	8	2	0.9376	1	0			sp|Q8VDW0|DX39A_MOUSE	Q8VDW0	DX39A_MOUSE	Ddx39a	ATP-dependent RNA helicase DDX39A	Ddx39b	sp|Q9Z1N5|DX39B_MOUSE
DVLIVVSRHLT	P	N	11	2, 3	0.9989	4	0			sp|P16712|A18_VACCW	P16712	A18_VACCW	VACWR138	Transcript termination protein A18
DVNAAIATIK	K	T	10	2	0.9974	2	0			sp|P05213|TBA1B_MOUSE	P05213	TBA1B_MOUSE	Tuba1b	Tubulin alpha-1B chain	Tuba1a, Tuba1c, Tuba3b	sp|P05214|TBA3_MOUSE, sp|P68369|TBA1A_MOUSE, sp|P68373|TBA1C_MOUSE
DVQLQESG	S	P	8	2	0.99	3	0			sp|P01822|HVM46_MOUSE	P01822	HVM46_MOUSE		Ig heavy chain V region MOPC 315	Ighv3-5, Ighv3-6	sp|P18531|HVM60_MOUSE, sp|P18532|HVM61_MOUSE, sp|P18533|HVM62_MOUSE
DVQLQESGP	S	G	9	2	0.9871	2	0			sp|P01822|HVM46_MOUSE	P01822	HVM46_MOUSE		Ig heavy chain V region MOPC 315	Ighv3-5, Ighv3-6	sp|P18531|HVM60_MOUSE, sp|P18532|HVM61_MOUSE, sp|P18533|HVM62_MOUSE
DVQLQESGPG	S	L	10	2	0.9987	8	0			sp|P01822|HVM46_MOUSE	P01822	HVM46_MOUSE		Ig heavy chain V region MOPC 315	Ighv3-5, Ighv3-6	sp|P18531|HVM60_MOUSE, sp|P18533|HVM62_MOUSE
DVQLQESGPGL	S	V	11	2	0.9996	11	0			sp|P01822|HVM46_MOUSE	P01822	HVM46_MOUSE		Ig heavy chain V region MOPC 315	Ighv3-5, Ighv3-6	sp|P18531|HVM60_MOUSE, sp|P18533|HVM62_MOUSE
DVQLQESGPGLVK	S	P	13	2, 3	1	14	0			sp|P01822|HVM46_MOUSE	P01822	HVM46_MOUSE		Ig heavy chain V region MOPC 315	Ighv3-5, Ighv3-6	sp|P18531|HVM60_MOUSE, sp|P18533|HVM62_MOUSE
DVQLQESGPGLVKP	S	S	14	2	0.9998	4	0			sp|P01822|HVM46_MOUSE	P01822	HVM46_MOUSE		Ig heavy chain V region MOPC 315	Ighv3-5, Ighv3-6	sp|P18531|HVM60_MOUSE, sp|P18533|HVM62_MOUSE
DVQLQESGPGLVKPS	S	Q	15	2	1	5	0			sp|P01822|HVM46_MOUSE	P01822	HVM46_MOUSE		Ig heavy chain V region MOPC 315	Ighv3-5, Ighv3-6	sp|P18531|HVM60_MOUSE, sp|P18533|HVM62_MOUSE
DVQLQESGPGLVKPSQ	S	S	16	2, 3	1	11	0			sp|P01822|HVM46_MOUSE	P01822	HVM46_MOUSE		Ig heavy chain V region MOPC 315	Ighv3-5, Ighv3-6	sp|P18531|HVM60_MOUSE, sp|P18533|HVM62_MOUSE
DVQLQESGPGLVKPSQS	S	L	17	3	1	4	0			sp|P01822|HVM46_MOUSE	P01822	HVM46_MOUSE		Ig heavy chain V region MOPC 315	Ighv3-5, Ighv3-6	sp|P18531|HVM60_MOUSE, sp|P18533|HVM62_MOUSE
DVTKVNPL	I	-	8	2	0.8351	1	0			sp|P23373|E10_VACCW	P23373	E10_VACCW	VACWR066	Probable FAD-linked sulfhydryl oxidase E10
DVTPADFSEWSK	A	-	12	2	1	35	0			iRT-pepH	iRT-pepH	iRT-pepH		iRT-pepH
DVTTFLSM	N	L	8	2	0.9986	36	0	8M(15.9949)		sp|P24770|B8_VACCW	P24770	B8_VACCW	VACWR190	Soluble interferon gamma receptor B8
DVYTFNAL	A	I	8	2	0.9795	1	0			sp|Q14C51|PTCD3_MOUSE	Q14C51	PTCD3_MOUSE	Ptcd3	Pentatricopeptide repeat domain-containing protein 3, mitochondrial
DYFEEYGK	R	I	8	2	0.872	1	0			sp|O88569|ROA2_MOUSE	O88569	ROA2_MOUSE	Hnrnpa2b1	Heterogeneous nuclear ribonucleoproteins A2/B1
DYFEQYGK	R	I	8	2	0.8216	1	0			sp|P49312|ROA1_MOUSE	P49312	ROA1_MOUSE	Hnrnpa1	Heterogeneous nuclear ribonucleoprotein A1
DYFYHDEL	D	-	8	2	0.9032	1	0			sp|Q8BP92|RCN2_MOUSE	Q8BP92	RCN2_MOUSE	Rcn2	Reticulocalbin-2
DYITVSNNL	W	S	9	2	0.9996	42	0			sp|P11370|ENV2_MOUSE	P11370	ENV2_MOUSE	Fv4	Retrovirus-related Env polyprotein from Fv-4 locus
DYITVSNNLS	W	S	10	2	0.771	1	0			sp|P11370|ENV2_MOUSE	P11370	ENV2_MOUSE	Fv4	Retrovirus-related Env polyprotein from Fv-4 locus
EAAEYAKL	E	L	8	2	0.9971	3	0			sp|P62754|RS6_MOUSE	P62754	RS6_MOUSE	Rps6	40S ribosomal protein S6
EAIEGTYIDK	K	K	10	2	0.993	1	0			sp|P62281|RS11_MOUSE	P62281	RS11_MOUSE	Rps11	40S ribosomal protein S11
EAIEVIHKL	G	L	9	2	0.9944	2	0			sp|Q09014|NCF1_MOUSE	Q09014	NCF1_MOUSE	Ncf1	Neutrophil cytosol factor 1
EAIHNFVEVL	L	N	10	2	0.9673	2	0			sp|P62743|AP2S1_MOUSE	P62743	AP2S1_MOUSE	Ap2s1	AP-2 complex subunit sigma
EAIKNHEEL	A	K	9	2	0.9987	2	0			sp|Q61112|CAB45_MOUSE	Q61112	CAB45_MOUSE	Sdf4	45 kDa calcium-binding protein
EAIQNSTSI	V	K	9	2	0.9946	4	0			sp|A2A432|CUL4B_MOUSE	A2A432	CUL4B_MOUSE	Cul4b	Cullin-4B
EAITFKNL	L	V	8	2	0.9923	2	0			sp|O35350|CAN1_MOUSE	O35350	CAN1_MOUSE	Capn1	Calpain-1 catalytic subunit
EAIVNQEII	F	G	9	2	0.9895	2	0			sp|Q811B1|XYLT1_MOUSE	Q811B1	XYLT1_MOUSE	Xylt1	Xylosyltransferase 1
EALINLDDM	G	H	9	2	0.9949	2	0	9M(15.9949)		sp|Q9WUM4|COR1C_MOUSE	Q9WUM4	COR1C_MOUSE	Coro1c	Coronin-1C
EALINSHVL	D	A	9	2	0.9953	2	0			sp|Q7TPH6|MYCB2_MOUSE	Q7TPH6	MYCB2_MOUSE	Mycbp2	E3 ubiquitin-protein ligase MYCBP2
EALLNTSTM	M	E	9	2	0.9988	1	0	9M(15.9949)		sp|Q7TMY8|HUWE1_MOUSE	Q7TMY8	HUWE1_MOUSE	Huwe1	E3 ubiquitin-protein ligase HUWE1
EALQNASVL	H	I	9	2	0.9917	1	0			sp|Q6P068|ARL5C_MOUSE	Q6P068	ARL5C_MOUSE	Arl5c	ADP-ribosylation factor-like protein 5C
EALSFVSL	E	V	8	2	0.9259	2	0			sp|P52332|JAK1_MOUSE	P52332	JAK1_MOUSE	Jak1	Tyrosine-protein kinase JAK1	Jak2	sp|Q62120|JAK2_MOUSE
EANNFLWPFK	K	L	10	2	0.9461	1	0			sp|P14148|RL7_MOUSE	P14148	RL7_MOUSE	Rpl7	60S ribosomal protein L7
EAPDYMYL	E	R	8	2	0.9975	15	0	6M(15.9949)		sp|Q8BK63|KC1A_MOUSE	Q8BK63	KC1A_MOUSE	Csnk1a1	Casein kinase I isoform alpha
EAPEFIEM	A	S	8	2	0.9412	3	0	8M(15.9949)		sp|P56480|ATPB_MOUSE	P56480	ATPB_MOUSE	Atp5f1b	ATP synthase subunit beta, mitochondrial
EAPESYKNV	E	T	9	2	0.965	2	0			sp|Q99LF4|RTCB_MOUSE	Q99LF4	RTCB_MOUSE	Rtcb	RNA-splicing ligase RtcB homolog
EAPSFLNGV	V	W	9	2	0.9626	1	0			sp|A6X919|D19L1_MOUSE	A6X919	D19L1_MOUSE	Dpy19l1	Probable C-mannosyltransferase DPY19L1
EAPYNSDTV	L	L	9	2	0.9685	1	0			sp|Q6ZQ88|KDM1A_MOUSE	Q6ZQ88	KDM1A_MOUSE	Kdm1a	Lysine-specific histone demethylase 1A
EAQTRPF	L	D	7	2	0.9365	1	0			sp|Q91Z83|MYH7_MOUSE	Q91Z83	MYH7_MOUSE	Myh7	Myosin-7	Myh6	sp|Q02566|MYH6_MOUSE
EASLAETEGRY	L	C	11	2	0.999	1	0			sp|P02535|K1C10_MOUSE	P02535	K1C10_MOUSE	Krt10	Keratin, type I cytoskeletal 10
EATFGVDESNAK	V	-	12	2	0.968	3	0			iRT-pepC	iRT-pepC	iRT-pepC		iRT-pepC
EAVTYQKL	S	V	8	2	0.9916	1	0			sp|O08529|CAN2_MOUSE	O08529	CAN2_MOUSE	Capn2	Calpain-2 catalytic subunit
EAVVNTQEL	R	L	9	2	0.9946	3	0			sp|Q99PV0|PRP8_MOUSE	Q99PV0	PRP8_MOUSE	Prpf8	Pre-mRNA-processing-splicing factor 8
EAVVNTVDI	A	S	9	2	0.9728	1	0			sp|Q9DBE9|SPB1_MOUSE	Q9DBE9	SPB1_MOUSE	Ftsj3	pre-rRNA 2'-O-ribose RNA methyltransferase FTSJ3
EAYRFTGL	L	S	8	2	0.9888	6	0			sp|Q8K015|CENPO_MOUSE	Q8K015	CENPO_MOUSE	Cenpo	Centromere protein O
ECKTHASSI	D	A	9	2	0.9968	9	0			sp|P08586|H7_VACCW	P08586	H7_VACCW	VACWR105	Late protein H7
EDAANNYAR	K	G	9	2	0.996	1	0			sp|P05213|TBA1B_MOUSE	P05213	TBA1B_MOUSE	Tuba1b	Tubulin alpha-1B chain	Tuba1a, Tuba1c, Tuba3b, Tuba4a, Tuba8	sp|P05214|TBA3_MOUSE, sp|P68368|TBA4A_MOUSE, sp|P68369|TBA1A_MOUSE, sp|P68373|TBA1C_MOUSE, sp|Q9JJZ2|TBA8_MOUSE
EDFHNTFM	I	D	8	2	0.9143	1	0	5N(0.9840), 8M(15.9949)		sp|Q7TQI3|OTUB1_MOUSE	Q7TQI3	OTUB1_MOUSE	Otub1	Ubiquitin thioesterase OTUB1
EDLRLPEGDLGK	R	E	12	3	0.9998	1	0			sp|P63242|IF5A1_MOUSE	P63242	IF5A1_MOUSE	Eif5a	Eukaryotic translation initiation factor 5A-1
EDMAALEK	R	D	8	2	0.9169	1	0			sp|P05213|TBA1B_MOUSE	P05213	TBA1B_MOUSE	Tuba1b	Tubulin alpha-1B chain	Tuba1a, Tuba1c, Tuba4a	sp|P68368|TBA4A_MOUSE, sp|P68369|TBA1A_MOUSE, sp|P68373|TBA1C_MOUSE
EDQTEYLEER	K	R	10	2	0.9984	1	0			sp|P11499|HS90B_MOUSE	P11499	HS90B_MOUSE	Hsp90ab1	Heat shock protein HSP 90-beta	Hsp90aa1	sp|P07901|HS90A_MOUSE
EDSKPQGCMYL	E	P	11	2	0.848	1	0			sp|Q8BYW1|RHG25_MOUSE	Q8BYW1	RHG25_MOUSE	Arhgap25	Rho GTPase-activating protein 25
EEESFPGFVNL	A	N	11	2	0.9999	19	0			sp|Q6ZWR6|SYNE1_MOUSE	Q6ZWR6	SYNE1_MOUSE	Syne1	Nesprin-1
EEPRYISVGYVD	L	N	12	2	0.7618	1	0			sp|P01899|HA11_MOUSE	P01899	HA11_MOUSE	H2-D1	H-2 class I histocompatibility antigen, D-B alpha chain
EESFPGFVNL	E	N	10	2	1	35	0			sp|Q6ZWR6|SYNE1_MOUSE	Q6ZWR6	SYNE1_MOUSE	Syne1	Nesprin-1
EEVMMKQQGF	G	Q	10	2	0.765	1	0	4M(15.9949), 5M(15.9949)		sp|Q91V83|TTI1_MOUSE	Q91V83	TTI1_MOUSE	Tti1	TELO2-interacting protein 1 homolog
EFIRNQEQM	E	K	9	2, 3	0.9886	4	0	9M(15.9949)		sp|P62192|PRS4_MOUSE	P62192	PRS4_MOUSE	Psmc1	26S proteasome regulatory subunit 4
EFVGVSHL	A	K	8	2	0.9596	2	0			sp|Q8BW10|NOB1_MOUSE	Q8BW10	NOB1_MOUSE	Nob1	RNA-binding protein NOB1
EFVQNQEVL	L	P	9	2	0.8526	1	0			sp|E9QAT4|SC16A_MOUSE	E9QAT4	SC16A_MOUSE	Sec16a	Protein transport protein Sec16A
EGAKFIAM	D	R	8	2	0.8308	2	0	8M(15.9949)		sp|O35657|NEUR1_MOUSE	O35657	NEUR1_MOUSE	Neu1	Sialidase-1
EGIDFYTSI	Y	T	9	2	0.9788	4	0			sp|P63017|HSP7C_MOUSE	P63017	HSP7C_MOUSE	Hspa8	Heat shock cognate 71 kDa protein	Hspa1a, Hspa1b, Hspa1l	sp|P16627|HS71L_MOUSE, sp|P17879|HS71B_MOUSE, sp|Q61696|HS71A_MOUSE
EGIINGHTL	A	L	9	2	0.9954	2	0			sp|Q9ER73|ELP4_MOUSE	Q9ER73	ELP4_MOUSE	Elp4	Elongator complex protein 4
EGINNLTHM	S	L	9	2	0.9999	4	0	9M(15.9949)		sp|Q8C8U0|LIPB1_MOUSE	Q8C8U0	LIPB1_MOUSE	Ppfibp1	Liprin-beta-1
EGISFRGL	D	F	8	2	0.9433	2	0			sp|P35700|PRDX1_MOUSE	P35700	PRDX1_MOUSE	Prdx1	Peroxiredoxin-1
EGLRNGVYL	E	A	9	2	0.9916	4	0			sp|Q9JKF1|IQGA1_MOUSE	Q9JKF1	IQGA1_MOUSE	Iqgap1	Ras GTPase-activating-like protein IQGAP1	Iqgap2	sp|Q3UQ44|IQGA2_MOUSE
EGLRWYASL	G	Q	9	2	0.9505	1	0			sp|P50637|TSPO_MOUSE	P50637	TSPO_MOUSE	Tspo	Translocator protein
EGPFYPTL	R	R	8	2	0.9696	1	0			sp|Q9DB27|MCTS1_MOUSE	Q9DB27	MCTS1_MOUSE	Mcts1	Malignant T-cell-amplified sequence 1
EGPTNVEDM	L	N	9	2	0.9064	1	0	9M(15.9949)		sp|Q8K2V6|IPO11_MOUSE	Q8K2V6	IPO11_MOUSE	Ipo11	Importin-11
EGPYYTHL	D	G	8	2	0.9987	3	0			sp|Q8BG87|TET3_MOUSE	Q8BG87	TET3_MOUSE	Tet3	Methylcytosine dioxygenase TET3
EGRAVYLNI	L	S	9	2	0.7584	1	0			sp|P30558|PAR1_MOUSE	P30558	PAR1_MOUSE	F2r	Proteinase-activated receptor 1
EGYKYERI	H	D	8	2	0.9856	2	0			sp|Q6PDQ2|CHD4_MOUSE	Q6PDQ2	CHD4_MOUSE	Chd4	Chromodomain-helicase-DNA-binding protein 4	Chd5	sp|A2A8L1|CHD5_MOUSE
EGYRVIEL	A	E	8	2	0.954	1	0			sp|Q8K3D3|SWI5_MOUSE	Q8K3D3	SWI5_MOUSE	Swi5	DNA repair protein SWI5 homolog
EGYVHADL	H	K	8	2	0.884	1	0			sp|P97343|UHMK1_MOUSE	P97343	UHMK1_MOUSE	Uhmk1	Serine/threonine-protein kinase Kist
EHLQLQNL	Q	G	8	2	0.9155	1	0			sp|Q68FD5|CLH1_MOUSE	Q68FD5	CLH1_MOUSE	Cltc	Clathrin heavy chain 1
EIAEAYLGK	K	T	9	2	0.9118	1	0			sp|P63017|HSP7C_MOUSE	P63017	HSP7C_MOUSE	Hspa8	Heat shock cognate 71 kDa protein
EIFRFYKL	C	I	8	2	0.9066	1	0			sp|Q8C0P5|COR2A_MOUSE	Q8C0P5	COR2A_MOUSE	Coro2a	Coronin-2A
EIIKDIHNL	A	E	9	2	0.9919	3	0			sp|P02468|LAMC1_MOUSE	P02468	LAMC1_MOUSE	Lamc1	Laminin subunit gamma-1
EIIPMFSNL	S	A	9	2	0.9914	6	0	5M(15.9949)		sp|Q76MZ3|2AAA_MOUSE	Q76MZ3	2AAA_MOUSE	Ppp2r1a	Serine/threonine-protein phosphatase 2A 65 kDa regulatory subunit A alpha isoform
EIISFQHL	E	K	8	2	0.9962	33	0			sp|Q8BGR2|LRC8D_MOUSE	Q8BGR2	LRC8D_MOUSE	Lrrc8d	Volume-regulated anion channel subunit LRRC8D	Lrrc8a, Lrrc8b	sp|Q5DU41|LRC8B_MOUSE, sp|Q80WG5|LRC8A_MOUSE
EIITFTAM	T	M	8	2	0.9989	26	0	8M(15.9949)		sp|A2AN08|UBR4_MOUSE	A2AN08	UBR4_MOUSE	Ubr4	E3 ubiquitin-protein ligase UBR4
EIKNLQYL	N	P	8	2	0.8262	1	0			sp|Q80T69|RSBN1_MOUSE	Q80T69	RSBN1_MOUSE	Rsbn1	Lysine-specific demethylase 9
EILKYFQSV	S	T	9	2	0.995	4	0			sp|Q8K1E0|STX5_MOUSE	Q8K1E0	STX5_MOUSE	Stx5	Syntaxin-5
EIMRFLSL	I	F	8	2	0.9859	2	0	3M(15.9949)		sp|Q6A009|LTN1_MOUSE	Q6A009	LTN1_MOUSE	Ltn1	E3 ubiquitin-protein ligase listerin
EIQTAVR	R	L	7	2	0.9376	1	0			sp|P10853|H2B1F_MOUSE	P10853	H2B1F_MOUSE	H2bc15	Histone H2B type 1-F/J/L	H2bc1, H2bc12, H2bc14, H2bc3, H2bc8, H2bc9, Hist1h2bp, Hist2h2bb	sp|P10854|H2B1M_MOUSE, sp|P70696|H2B1A_MOUSE, sp|Q64475|H2B1B_MOUSE, sp|Q64478|H2B1H_MOUSE, sp|Q64525|H2B2B_MOUSE, sp|Q6ZWY9|H2B1C_MOUSE, sp|Q8CGP1|H2B1K_MOUSE, sp|Q8CGP2|H2B1P_MOUSE
EIQYLTNL	E	Q	8	2	0.7896	1	0			sp|Q5DU41|LRC8B_MOUSE	Q5DU41	LRC8B_MOUSE	Lrrc8b	Volume-regulated anion channel subunit LRRC8B
EITALAPS	K	T	8	2	0.9276	2	0			sp|P60710|ACTB_MOUSE	P60710	ACTB_MOUSE	Actb	Actin, cytoplasmic 1	Acta1, Acta2, Actc1, Actg1, Actg2	sp|P62737|ACTA_MOUSE, sp|P63260|ACTG_MOUSE, sp|P63268|ACTH_MOUSE, sp|P68033|ACTC_MOUSE, sp|P68134|ACTS_MOUSE
EITALAPSTMK	K	I	11	2	0.9227	3	0	10M(15.9949)		sp|P60710|ACTB_MOUSE	P60710	ACTB_MOUSE	Actb	Actin, cytoplasmic 1	Acta1, Acta2, Actc1, Actg1, Actg2	sp|P62737|ACTA_MOUSE, sp|P63260|ACTG_MOUSE, sp|P63268|ACTH_MOUSE, sp|P68033|ACTC_MOUSE, sp|P68134|ACTS_MOUSE
EITTFSRL	T	L	8	2	0.9898	3	0			sp|E9Q555|RN213_MOUSE	E9Q555	RN213_MOUSE	Rnf213	E3 ubiquitin-protein ligase RNF213
EIVDFLTGV	D	L	9	2	0.9935	2	0			sp|A2RSY1|KANL3_MOUSE	A2RSY1	KANL3_MOUSE	Kansl3	KAT8 regulatory NSL complex subunit 3
EIVPLFTNL	T	A	9	2	0.97	2	0			sp|Q7TNP2|2AAB_MOUSE	Q7TNP2	2AAB_MOUSE	Ppp2r1b	Serine/threonine-protein phosphatase 2A 65 kDa regulatory subunit A beta isoform
EIVQFFSGL	E	E	9	2	0.9963	12	0			sp|Q9Z2X1|HNRPF_MOUSE	Q9Z2X1	HNRPF_MOUSE	Hnrnpf	Heterogeneous nuclear ribonucleoprotein F	Hnrnph1, Hnrnph2	sp|O35737|HNRH1_MOUSE, sp|P70333|HNRH2_MOUSE
EIVSFQHL	E	R	8	2	0.9969	17	0			sp|Q8R502|LRC8C_MOUSE	Q8R502	LRC8C_MOUSE	Lrrc8c	Volume-regulated anion channel subunit LRRC8C
EIVTFERL	N	R	8	2	0.9999	11	0			sp|Q61584|FXR1_MOUSE	Q61584	FXR1_MOUSE	Fxr1	RNA-binding protein FXR1
EIYEFHKM	T	L	8	2	0.9981	7	0	8M(15.9949)		sp|Q09014|NCF1_MOUSE	Q09014	NCF1_MOUSE	Ncf1	Neutrophil cytosol factor 1
EIYEFHKML	T	K	9	3	0.9058	1	0	8M(15.9949)		sp|Q09014|NCF1_MOUSE	Q09014	NCF1_MOUSE	Ncf1	Neutrophil cytosol factor 1
EIYEFHNNI	Q	F	9	2	0.9861	2	0			sp|Q0KL02|TRIO_MOUSE	Q0KL02	TRIO_MOUSE	Trio	Triple functional domain protein
EIYNFVHQL	I	T	9	2	0.9359	1	0			sp|Q6DFX2|ANTR2_MOUSE	Q6DFX2	ANTR2_MOUSE	Antxr2	Anthrax toxin receptor 2
EIYSFSESL	D	R	9	2	0.9963	2	0			sp|P27641|XRCC5_MOUSE	P27641	XRCC5_MOUSE	Xrcc5	X-ray repair cross-complementing protein 5
EKANTSIC	K	L	8	2	0.7441	1	0			sp|P06800|PTPRC_MOUSE	P06800	PTPRC_MOUSE	Ptprc	Receptor-type tyrosine-protein phosphatase C
EKAVMVSF	V	Q	8	2	0.8646	1	0			sp|P01027|CO3_MOUSE	P01027	CO3_MOUSE	C3	Complement C3
EKLDAQSLNL	I	S	10	2	0.786	1	0			sp|Q9JM13|RABX5_MOUSE	Q9JM13	RABX5_MOUSE	Rabgef1	Rab5 GDP/GTP exchange factor
EKPDFINV	L	C	8	2	0.8657	2	0			sp|Q3TXS7|PSMD1_MOUSE	Q3TXS7	PSMD1_MOUSE	Psmd1	26S proteasome non-ATPase regulatory subunit 1
EKSVKFI	K	D	7	2	0.8931	2	0			sp|P05807|NTP1_VACCW	P05807	NTP1_VACCW	NPH1	Nucleoside triphosphatase I
EKYFFINV	S	C	8	2	0.993	2	0			sp|Q07113|MPRI_MOUSE	Q07113	MPRI_MOUSE	Igf2r	Cation-independent mannose-6-phosphate receptor
ELFPVFTQL	R	P	9	2	0.9999	40	0			sp|Q99KU6|CF089_MOUSE	Q99KU6	CF089_MOUSE		Bombesin receptor-activated protein C6orf89 homolog
ELGTMTQTL	E	E	9	2	0.7664	1	0			sp|Q60953|PML_MOUSE	Q60953	PML_MOUSE	Pml	Protein PML
ELISNASDALDK	R	I	12	2	0.9995	2	0			sp|P11499|HS90B_MOUSE	P11499	HS90B_MOUSE	Hsp90ab1	Heat shock protein HSP 90-beta	Hsp90b1	sp|P08113|ENPL_MOUSE
ELISNSSDALDK	R	I	12	2	0.9996	1	0			sp|P07901|HS90A_MOUSE	P07901	HS90A_MOUSE	Hsp90aa1	Heat shock protein HSP 90-alpha
ELLMNADVI	R	C	9	2	0.9428	2	0	4M(15.9949)		sp|Q9EPU0|RENT1_MOUSE	Q9EPU0	RENT1_MOUSE	Upf1	Regulator of nonsense transcripts 1
ELLTLDEK	R	D	8	2	0.753	1	0			sp|Q6ZWN5|RS9_MOUSE	Q6ZWN5	RS9_MOUSE	Rps9	40S ribosomal protein S9
ELPAYLKL	I	A	8	2	0.9302	2	0			sp|Q61168|LAPM5_MOUSE	Q61168	LAPM5_MOUSE	Laptm5	Lysosomal-associated transmembrane protein 5
ELRSPTEL	L	M	8	2	0.8052	1	0			sp|E9Q309|CE350_MOUSE	E9Q309	CE350_MOUSE	Cep350	Centrosome-associated protein 350
ELTPAFSQL	F	T	9	2	0.9816	1	0			sp|Q8CFQ3|AQR_MOUSE	Q8CFQ3	AQR_MOUSE	Aqr	RNA helicase aquarius
ELVTPPVEPV	S	L	10	2	0.7643	1	0			sp|Q9JJ11|TACC3_MOUSE	Q9JJ11	TACC3_MOUSE	Tacc3	Transforming acidic coiled-coil-containing protein 3
EMAELTARI	S	S	9	2	0.7345	1	0	2M(15.9949)		sp|P26041|MOES_MOUSE	P26041	MOES_MOUSE	Msn	Moesin
EMGFNVDTL	V	P	9	2	0.9959	1	0	2M(15.9949)		sp|Q9EQH4|TAF8_MOUSE	Q9EQH4	TAF8_MOUSE	Taf8	Transcription initiation factor TFIID subunit 8
EMIDVIGV	D	T	8	2	0.9589	1	0	2M(15.9949)		sp|P27659|RL3_MOUSE	P27659	RL3_MOUSE	Rpl3	60S ribosomal protein L3
EMVDIIETV	Q	Y	9	2	0.9762	2	0	2M(15.9949)		sp|P83877|TXN4A_MOUSE	P83877	TXN4A_MOUSE	Txnl4a	Thioredoxin-like protein 4A
ENFIFSYM	A	G	8	2	0.9883	2	0	8M(15.9949)		sp|Q8BLV3|SL9A7_MOUSE	Q8BLV3	SL9A7_MOUSE	Slc9a7	Sodium/hydrogen exchanger 7
ENFRFLSL	A	F	8	2	0.985	1	0			sp|Q8VEC4|CAHM2_MOUSE	Q8VEC4	CAHM2_MOUSE	Calhm2	Calcium homeostasis modulator protein 2
ENFTFQKV	L	L	8	2	0.9988	3	0			sp|P28867|KPCD_MOUSE	P28867	KPCD_MOUSE	Prkcd	Protein kinase C delta type
ENITFGQL	N	G	8	2	0.9769	2	0			sp|Q8R0A7|K0513_MOUSE	Q8R0A7	K0513_MOUSE	Kiaa0513	Uncharacterized protein KIAA0513
ENLHFENL	F	W	8	2	0.9691	1	0			sp|Q6NVF4|HELB_MOUSE	Q6NVF4	HELB_MOUSE	Helb	DNA helicase B
ENLKYFLL	I	K	8	2	0.9748	1	0			sp|Q9JMG2|C1GLC_MOUSE	Q9JMG2	C1GLC_MOUSE	C1galt1c1	C1GALT1-specific chaperone 1
ENLTYLQL	H	L	8	2	0.9647	2	0			sp|Q9QXS1|PLEC_MOUSE	Q9QXS1	PLEC_MOUSE	Plec	Plectin	Dsp, Eppk1	sp|E9Q557|DESP_MOUSE, sp|Q8R0W0|EPIPL_MOUSE
ENNIDFLKD	V	D	9	2	0.7546	1	0			sp|P21607|E6_VACCW	P21607	E6_VACCW	VACWR062	Protein E6
ENRIFGGL	S	D	8	2	0.8188	1	0			sp|Q9EST5|AN32B_MOUSE	Q9EST5	AN32B_MOUSE	Anp32b	Acidic leucine-rich nuclear phosphoprotein 32 family member B
ENSKVLGEAM	M	T	10	2	0.9881	1	0	10M(15.9949)		sp|P26039|TLN1_MOUSE	P26039	TLN1_MOUSE	Tln1	Talin-1
ENTQTTIK	R	L	8	2	0.9651	1	0			sp|P61979|HNRPK_MOUSE	P61979	HNRPK_MOUSE	Hnrnpk	Heterogeneous nuclear ribonucleoprotein K
ENYDFTKF	L	H	8	2	0.989	3	0			sp|Q9EQP2|EHD4_MOUSE	Q9EQP2	EHD4_MOUSE	Ehd4	EH domain-containing protein 4
ENYDRGYSNL	R	L	10	2	0.9705	3	0			sp|Q61656|DDX5_MOUSE	Q61656	DDX5_MOUSE	Ddx5	Probable ATP-dependent RNA helicase DDX5
ENYDRGYSNLL	R	K	11	2	0.845	1	0			sp|Q61656|DDX5_MOUSE	Q61656	DDX5_MOUSE	Ddx5	Probable ATP-dependent RNA helicase DDX5
ENYLYLVM	D	D	8	2	0.9575	1	0	8M(15.9949)		sp|Q7TT50|MRCKB_MOUSE	Q7TT50	MRCKB_MOUSE	Cdc42bpb	Serine/threonine-protein kinase MRCK beta	Dmpk	sp|P54265|DMPK_MOUSE
ENYNFLLQL	Q	Q	9	2	0.8553	1	0			sp|Q920B9|SP16H_MOUSE	Q920B9	SP16H_MOUSE	Supt16h	FACT complex subunit SPT16
ENYSFEEL	Y	R	8	2	0.9879	2	0			sp|Q7TPH6|MYCB2_MOUSE	Q7TPH6	MYCB2_MOUSE	Mycbp2	E3 ubiquitin-protein ligase MYCBP2
ENYSHLVSV	L	G	9	2	0.7655	1	0			sp|Q62396|ZFP92_MOUSE	Q62396	ZFP92_MOUSE	Zfp92	Zinc finger protein 92
EPEIFPKFTGV	S	K	11	2	0.9897	2	0			sp|Q91Y44|BRDT_MOUSE	Q91Y44	BRDT_MOUSE	Brdt	Bromodomain testis-specific protein
EPFLSLSL	P	D	8	2	0.7565	1	0			sp|Q52KR3|PRUN2_MOUSE	Q52KR3	PRUN2_MOUSE	Prune2	Protein prune homolog 2
EPIPYEFMA	L	-	9	2	0.7281	1	0	8M(15.9949)		sp|O09167|RL21_MOUSE	O09167	RL21_MOUSE	Rpl21	60S ribosomal protein L21
EPPVYANL	S	S	8	2	0.9975	10	0			sp|P05627|JUN_MOUSE	P05627	JUN_MOUSE	Jun	Transcription factor Jun
EPVTGLDAK	S	-	9	2	0.9988	42	0			iRT-pepB	iRT-pepB	iRT-pepB		iRT-pepB
EQFTFSNV	I	C	8	2	0.9993	37	0	2Q(0.9840)		sp|Q76ZP7|RP132_VACCW	Q76ZP7	RP132_VACCW	RPO132	DNA-directed RNA polymerase 133 kDa polypeptide
EQMEFPLL	Y	K	8	2	0.8951	1	0	3M(15.9949)		sp|Q9Z103|ADNP_MOUSE	Q9Z103	ADNP_MOUSE	Adnp	Activity-dependent neuroprotector homeobox protein
EQVANSAFVER	K	V	11	2	0.9997	1	0			sp|P11499|HS90B_MOUSE	P11499	HS90B_MOUSE	Hsp90ab1	Heat shock protein HSP 90-beta
EQVENIKPEI	S	V	10	2	0.9919	2	0			sp|O08808|DIAP1_MOUSE	O08808	DIAP1_MOUSE	Diaph1	Protein diaphanous homolog 1
EQVIFKYL	M	R	8	2	0.9898	1	0			sp|Q99JY9|ARP3_MOUSE	Q99JY9	ARP3_MOUSE	Actr3	Actin-related protein 3
EQYIYPTI	K	V	8	2	0.9862	1	0			sp|Q9WU56|PUS1_MOUSE	Q9WU56	PUS1_MOUSE	Pus1	Pseudouridylate synthase 1 homolog
EQYKFYSV	N	N	8	2	0.9963	4	0			sp|Q62425|NDUA4_MOUSE	Q62425	NDUA4_MOUSE	Ndufa4	Cytochrome c oxidase subunit NDUFA4
ERLPLYLRL	K	L	9	2	0.9539	1	0			sp|Q9JLV2|TP4AP_MOUSE	Q9JLV2	TP4AP_MOUSE	Trpc4ap	Short transient receptor potential channel 4-associated protein
ERPTYTNL	I	N	8	2	0.9991	20	0			sp|P05213|TBA1B_MOUSE	P05213	TBA1B_MOUSE	Tuba1b	Tubulin alpha-1B chain	Tuba1a, Tuba1c, Tuba3b, Tuba4a, Tuba8	sp|P05214|TBA3_MOUSE, sp|P68368|TBA4A_MOUSE, sp|P68369|TBA1A_MOUSE, sp|P68373|TBA1C_MOUSE, sp|Q9JJZ2|TBA8_MOUSE
ERYIHLENL	P	L	9	2	0.9804	2	0			sp|Q3UKJ7|SMU1_MOUSE	Q3UKJ7	SMU1_MOUSE	Smu1	WD40 repeat-containing protein SMU1
ESAISNLDYI	V	S	10	2	0.9993	21	0			sp|Q9R0C8|VAV3_MOUSE	Q9R0C8	VAV3_MOUSE	Vav3	Guanine nucleotide exchange factor VAV3
ESFFYTHL	R	I	8	2	0.9976	2	0			sp|Q7TMB8|CYFP1_MOUSE	Q7TMB8	CYFP1_MOUSE	Cyfip1	Cytoplasmic FMR1-interacting protein 1
ESFKFISGI	V	L	9	2	0.7863	1	0			sp|Q9D3W4|GPN3_MOUSE	Q9D3W4	GPN3_MOUSE	Gpn3	GPN-loop GTPase 3
ESFPGFVNL	E	N	9	2	0.9995	32	0			sp|Q6ZWR6|SYNE1_MOUSE	Q6ZWR6	SYNE1_MOUSE	Syne1	Nesprin-1
ESFQFYDRL	T	R	9	2	0.9948	1	0			sp|Q8K284|TF3C1_MOUSE	Q8K284	TF3C1_MOUSE	Gtf3c1	General transcription factor 3C polypeptide 1
ESFSDYPPL	V	G	9	2	0.9991	28	0			sp|P10126|EF1A1_MOUSE	P10126	EF1A1_MOUSE	Eef1a1	Elongation factor 1-alpha 1
ESFTFPEL	Y	T	8	2	0.955	1	0			sp|P29416|HEXA_MOUSE	P29416	HEXA_MOUSE	Hexa	Beta-hexosaminidase subunit alpha
ESGPSLVKPS	Q	Q	10	2	0.9564	2	0			sp|P01823|HVM47_MOUSE	P01823	HVM47_MOUSE		Ig heavy chain V region 36-60
ESIKNQMTV	A	K	9	2	0.9967	2	0	7M(15.9949)		sp|P97311|MCM6_MOUSE	P97311	MCM6_MOUSE	Mcm6	DNA replication licensing factor MCM6
ESITFIGRL	D	C	9	2	0.9942	3	0			sp|Q8C2E7|WASC5_MOUSE	Q8C2E7	WASC5_MOUSE	Washc5	WASH complex subunit 5
ESITFKSV	A	S	8	2	0.9983	1	0			sp|P97868|RBBP6_MOUSE	P97868	RBBP6_MOUSE	Rbbp6	E3 ubiquitin-protein ligase RBBP6
ESLAFHGL	A	P	8	2	0.9753	1	0			sp|P41164|ETV1_MOUSE	P41164	ETV1_MOUSE	Etv1	ETS translocation variant 1
ESLANKTEL	E	P	9	2	0.9581	2	0			sp|Q9QXZ0|MACF1_MOUSE	Q9QXZ0	MACF1_MOUSE	Macf1	Microtubule-actin cross-linking factor 1, isoforms 1/2/3/4
ESLLMKLY	D	S	8	2	0.8983	1	0	5M(15.9949)		sp|Q922D4|PP6R3_MOUSE	Q922D4	PP6R3_MOUSE	Ppp6r3	Serine/threonine-protein phosphatase 6 regulatory subunit 3
ESLRNDQVL	M	Q	9	2	0.7466	1	0			sp|Q5U430|UBR3_MOUSE	Q5U430	UBR3_MOUSE	Ubr3	E3 ubiquitin-protein ligase UBR3
ESLTYASM	K	T	8	2	0.9434	1	0	8M(15.9949)		sp|Q3U7U4|CA162_MOUSE	Q3U7U4	CA162_MOUSE		Transmembrane protein C1orf162 homolog
ESPEFVRV	P	R	8	2	0.9936	4	0			sp|Q8R1R3|STAR7_MOUSE	Q8R1R3	STAR7_MOUSE	Stard7	StAR-related lipid transfer protein 7, mitochondrial
ESPINVTTV	Q	R	9	2	0.9979	11	0			sp|Q65Z40|WAPL_MOUSE	Q65Z40	WAPL_MOUSE	Wapl	Wings apart-like protein homolog
ESPLFLKL	I	N	8	2	0.9879	1	0			sp|O88545|CSN6_MOUSE	O88545	CSN6_MOUSE	Cops6	COP9 signalosome complex subunit 6
ESPLFNNV	Q	K	8	2	0.9997	7	0			sp|Q9CQ80|VPS25_MOUSE	Q9CQ80	VPS25_MOUSE	Vps25	Vacuolar protein-sorting-associated protein 25
ESPLNSDVL	E	N	9	2	0.9899	2	0			sp|Q80UJ7|RB3GP_MOUSE	Q80UJ7	RB3GP_MOUSE	Rab3gap1	Rab3 GTPase-activating protein catalytic subunit
ESPRNAQLL	L	Y	9	2	0.8234	2	0			sp|O35516|NOTC2_MOUSE	O35516	NOTC2_MOUSE	Notch2	Neurogenic locus notch homolog protein 2
ESPSYRTL	E	N	8	2	0.9878	3	0			sp|Q8BLG0|PHF20_MOUSE	Q8BLG0	PHF20_MOUSE	Phf20	PHD finger protein 20
ESPVGFGHM	P	S	9	2	0.9922	5	0	9M(15.9949)		sp|Q8BGS7|CEPT1_MOUSE	Q8BGS7	CEPT1_MOUSE	Cept1	Choline/ethanolaminephosphotransferase 1
ESPVYLVV	E	S	8	2	0.9497	2	0			sp|Q8BIY1|GPTC3_MOUSE	Q8BIY1	GPTC3_MOUSE	Gpatch3	G patch domain-containing protein 3
ESTLHLVLR	K	L	9	2	0.7821	1	0			sp|P62984|RL40_MOUSE	P62984	RL40_MOUSE	Uba52	Ubiquitin-60S ribosomal protein L40	Rps27a, Ubb, Ubc	sp|P0CG49|UBB_MOUSE, sp|P0CG50|UBC_MOUSE, sp|P62983|RS27A_MOUSE
ESVEFQNL	G	A	8	2	0.9938	7	0			sp|P08775|RPB1_MOUSE	P08775	RPB1_MOUSE	Polr2a	DNA-directed RNA polymerase II subunit RPB1
ESVFFHSL	F	A	8	2	0.9337	2	0			sp|Q9CZ91|SRFB1_MOUSE	Q9CZ91	SRFB1_MOUSE	Srfbp1	Serum response factor-binding protein 1
ESYIFTLL	V	N	8	2	0.9366	6	0			sp|Q80TA9|EPG5_MOUSE	Q80TA9	EPG5_MOUSE	Epg5	Ectopic P granules protein 5 homolog
ESYKYQVL	V	A	8	2	0.9925	2	0			sp|Q811G0|PTHB1_MOUSE	Q811G0	PTHB1_MOUSE	Bbs9	Protein PTHB1
ESYSFEARM	V	E	9	2	0.9996	2	0	9M(15.9949)		sp|Q9CQG3|ZMY19_MOUSE	Q9CQG3	ZMY19_MOUSE	Zmynd19	Zinc finger MYND domain-containing protein 19
ESYSIYVYK	K	V	9	2	0.997	1	0			sp|Q64524|H2B2E_MOUSE	Q64524	H2B2E_MOUSE	H2bc21	Histone H2B type 2-E	H2bc26, H2bu2	sp|Q8CGP0|H2B3B_MOUSE, sp|Q9D2U9|H2B3A_MOUSE
ESYSVYVYK	K	V	9	2	0.9984	2	0			sp|P10853|H2B1F_MOUSE	P10853	H2B1F_MOUSE	H2bc15	Histone H2B type 1-F/J/L	H2bc12, H2bc14, H2bc3, H2bc8, H2bc9, Hist1h2bp, Hist2h2bb	sp|P10854|H2B1M_MOUSE, sp|Q64475|H2B1B_MOUSE, sp|Q64478|H2B1H_MOUSE, sp|Q64525|H2B2B_MOUSE, sp|Q6ZWY9|H2B1C_MOUSE, sp|Q8CGP1|H2B1K_MOUSE, sp|Q8CGP2|H2B1P_MOUSE
ETAEAYLGK	K	K	9	2	0.7506	1	0			sp|P20029|BIP_MOUSE	P20029	BIP_MOUSE	Hspa5	Endoplasmic reticulum chaperone BiP
ETFLFATV	F	S	8	2	0.9977	2	0			sp|Q8R151|ZNFX1_MOUSE	Q8R151	ZNFX1_MOUSE	Znfx1	NFX1-type zinc finger-containing protein 1
ETFTRDNNM	S	G	9	2	0.999	1	0	9M(15.9949)		sp|O88543|CSN3_MOUSE	O88543	CSN3_MOUSE	Cops3	COP9 signalosome complex subunit 3
ETIKFEKL	A	A	8	2	0.9737	1	0			sp|Q8K1A6|C2D1A_MOUSE	Q8K1A6	C2D1A_MOUSE	Cc2d1a	Coiled-coil and C2 domain-containing protein 1A
ETIMNQEKL	K	A	9	2	0.9996	23	0	4M(15.9949), 6Q(0.9840)		sp|Q64152|BTF3_MOUSE	Q64152	BTF3_MOUSE	Btf3	Transcription factor BTF3
ETITNAETA	Q	K	9	2	0.8987	1	0			sp|P06745|G6PI_MOUSE	P06745	G6PI_MOUSE	Gpi	Glucose-6-phosphate isomerase
ETPVYANL	T	S	8	2	0.9971	9	0			sp|P15066|JUND_MOUSE	P15066	JUND_MOUSE	Jund	Transcription factor JunD
ETVEYKNI	V	C	8	2	0.9301	1	0			sp|P61750|ARF4_MOUSE	P61750	ARF4_MOUSE	Arf4	ADP-ribosylation factor 4	Arf1, Arf2, Arf3, Arf5	sp|P61205|ARF3_MOUSE, sp|P84078|ARF1_MOUSE, sp|P84084|ARF5_MOUSE, sp|Q8BSL7|ARF2_MOUSE
ETVTYKNL	V	K	8	2	0.9781	4	0			sp|P61211|ARL1_MOUSE	P61211	ARL1_MOUSE	Arl1	ADP-ribosylation factor-like protein 1
ETVTYKNV	V	K	8	2	0.9971	3	0			sp|P62331|ARF6_MOUSE	P62331	ARF6_MOUSE	Arf6	ADP-ribosylation factor 6
ETWVFPVL	H	S	8	2	0.9485	1	0			sp|A8C756|THADA_MOUSE	A8C756	THADA_MOUSE	Thada	Thyroid adenoma-associated protein homolog
ETYDYGGFTM	D	M	10	2	0.9923	1	0	10M(15.9949)		sp|P61979|HNRPK_MOUSE	P61979	HNRPK_MOUSE	Hnrnpk	Heterogeneous nuclear ribonucleoprotein K
ETYKYFSL	Q	P	8	2	0.9972	3	0			sp|Q9ET30|TM9S3_MOUSE	Q9ET30	TM9S3_MOUSE	Tm9sf3	Transmembrane 9 superfamily member 3
EVATNSELVQSGK	R	S	13	2	0.938	1	0			sp|Q9QWL7|K1C17_MOUSE	Q9QWL7	K1C17_MOUSE	Krt17	Keratin, type I cytoskeletal 17	Krt14	sp|Q61781|K1C14_MOUSE
EVDEQMLNVQNK	K	N	12	2	0.9409	1	0			sp|P68372|TBB4B_MOUSE	P68372	TBB4B_MOUSE	Tubb4b	Tubulin beta-4B chain	Tubb2a, Tubb2b, Tubb5	sp|P99024|TBB5_MOUSE, sp|Q7TMM9|TBB2A_MOUSE, sp|Q9CWF2|TBB2B_MOUSE
EVFDFRGM	G	R	8	2	0.7592	1	0	8M(15.9949)		sp|P28660|NCKP1_MOUSE	P28660	NCKP1_MOUSE	Nckap1	Nck-associated protein 1
EVFEFLQQV	S	D	9	2	0.9934	3	0			sp|Q2EMV9|PAR14_MOUSE	Q2EMV9	PAR14_MOUSE	Parp14	Protein mono-ADP-ribosyltransferase PARP14
EVFGQVTERE	E	L	10	2	0.9362	1	0	5Q(0.9840)		sp|Q8K4P8|HECW1_MOUSE	Q8K4P8	HECW1_MOUSE	Hecw1	E3 ubiquitin-protein ligase HECW1
EVFHFFNV	D	L	8	2	0.996	2	0			sp|Q5BU09|EAPP_MOUSE	Q5BU09	EAPP_MOUSE	Eapp	E2F-associated phosphoprotein
EVGGGFKVAM	G	N	10	2	0.8547	3	0	10M(15.9949)		sp|Q8JZN5|ACAD9_MOUSE	Q8JZN5	ACAD9_MOUSE	Acad9	Complex I assembly factor ACAD9, mitochondrial
EVGSIIGK	K	K	8	2	0.792	1	0			sp|P60335|PCBP1_MOUSE	P60335	PCBP1_MOUSE	Pcbp1	Poly(rC)-binding protein 1	Pcbp2, Pcbp3, Pcbp4	sp|P57722|PCBP3_MOUSE, sp|P57724|PCBP4_MOUSE, sp|Q61990|PCBP2_MOUSE
EVIDFSHGL	D	A	9	2	0.9579	2	0			sp|Q7M759|AB17B_MOUSE	Q7M759	AB17B_MOUSE	Abhd17b	Alpha/beta hydrolase domain-containing protein 17B	Abhd17a, Abhd17c	sp|Q8VCV1|AB17C_MOUSE, sp|Q99JW1|AB17A_MOUSE
EVLDFITHL	F	Y	9	2	0.9702	1	0			sp|Q9DBL7|COASY_MOUSE	Q9DBL7	COASY_MOUSE	Coasy	Bifunctional coenzyme A synthase
EVLEEFPSL	L	H	9	2	0.9758	2	0			sp|P29477|NOS2_MOUSE	P29477	NOS2_MOUSE	Nos2	Nitric oxide synthase, inducible
EVLEYNAL	K	G	8	2	0.9795	3	0			sp|Q920E5|FPPS_MOUSE	Q920E5	FPPS_MOUSE	Fdps	Farnesyl pyrophosphate synthase
EVLKFTQV	V	K	8	2	0.9717	1	0			sp|P47791|GSHR_MOUSE	P47791	GSHR_MOUSE	Gsr	Glutathione reductase, mitochondrial
EVLRDFPEL	S	T	9	2	0.9908	2	0			sp|P50516|VATA_MOUSE	P50516	VATA_MOUSE	Atp6v1a	V-type proton ATPase catalytic subunit A
EVLRFTQNM	N	M	9	2	0.9983	2	0	9M(15.9949)		sp|Q924D0|RT4I1_MOUSE	Q924D0	RT4I1_MOUSE	Rtn4ip1	Reticulon-4-interacting protein 1, mitochondrial
EVSTYIK	K	K	7	2	0.8694	1	0			sp|P10126|EF1A1_MOUSE	P10126	EF1A1_MOUSE	Eef1a1	Elongation factor 1-alpha 1
EVVDFEKL	Q	D	8	2	0.992	2	0			sp|Q9Z2G9|HTAI2_MOUSE	Q9Z2G9	HTAI2_MOUSE	Htatip2	Oxidoreductase HTATIP2
EVYLFERI	K	D	8	2	0.9988	18	0			sp|P97390|VPS45_MOUSE	P97390	VPS45_MOUSE	Vps45	Vacuolar protein sorting-associated protein 45
EVYNFNAI	Q	N	8	2	0.9854	1	0			sp|P24527|LKHA4_MOUSE	P24527	LKHA4_MOUSE	Lta4h	Leukotriene A-4 hydrolase
EVYPFGIVGM	G	A	10	2	0.9991	9	0	10M(15.9949)		sp|Q91W50|CSDE1_MOUSE	Q91W50	CSDE1_MOUSE	Csde1	Cold shock domain-containing protein E1
EVYSFSGL	M	Q	8	2	0.999	5	0			sp|Q9D722|OSER1_MOUSE	Q9D722	OSER1_MOUSE	Oser1	Oxidative stress-responsive serine-rich protein 1
EWIAVNTV	N	D	8	2	0.965	1	0			sp|Q921Y0|MOB1A_MOUSE	Q921Y0	MOB1A_MOUSE	Mob1a	MOB kinase activator 1A
EWIKAIQV	T	A	8	2	0.9901	2	0			sp|Q9JHK5|PLEK_MOUSE	Q9JHK5	PLEK_MOUSE	Plek	Pleckstrin
EWIPVTKL	K	G	8	2	0.9779	3	0			sp|P25444|RS2_MOUSE	P25444	RS2_MOUSE	Rps2	40S ribosomal protein S2
EYAITNDK	Q	T	8	2	0.7883	1	0			sp|Q5HZJ0|RNC_MOUSE	Q5HZJ0	RNC_MOUSE	Drosha	Ribonuclease 3
EYIRGGI	S	V	7	2	0.9842	3	0			sp|P31254|UBA1Y_MOUSE	P31254	UBA1Y_MOUSE	Uba1y	Ubiquitin-like modifier-activating enzyme 1 Y
EYLLVMEYYP	M	N	10	2	0.9808	1	0	6M(15.9949)		sp|O35607|BMPR2_MOUSE	O35607	BMPR2_MOUSE	Bmpr2	Bone morphogenetic protein receptor type-2
FAAASREVL	A	A	9	2	0.9984	2	0			sp|Q9CYZ6|REX1B_MOUSE	Q9CYZ6	REX1B_MOUSE	Rex1bd	Required for excision 1-B domain-containing protein
FAAATGATPIAGR	K	F	13	2	0.9998	1	0			sp|P14206|RSSA_MOUSE	P14206	RSSA_MOUSE	Rpsa	40S ribosomal protein SA
FAAPATATIATL	P	Q	12	2	0.9984	4	0			sp|Q91WT8|RBM47_MOUSE	Q91WT8	RBM47_MOUSE	Rbm47	RNA-binding protein 47
FADLSEAANR	K	N	10	2	0.9971	2	0			sp|P20152|VIME_MOUSE	P20152	VIME_MOUSE	Vim	Vimentin
FAFESVVAI	Q	A	9	2	0.8162	1	0			sp|Q8C147|DOCK8_MOUSE	Q8C147	DOCK8_MOUSE	Dock8	Dedicator of cytokinesis protein 8
FAFSGGLYGGLPPT	N	H	14	2	0.9996	12	0			sp|Q8R3G1|PP1R8_MOUSE	Q8R3G1	PP1R8_MOUSE	Ppp1r8	Nuclear inhibitor of protein phosphatase 1
FAFVNEEKF	L	N	9	2	0.9971	1	0			sp|Q9Z2C5|MTM1_MOUSE	Q9Z2C5	MTM1_MOUSE	Mtm1	Myotubularin
FAGHSGDVM	G	S	9	2	0.9981	5	0	9M(15.9949)		sp|P62880|GBB2_MOUSE	P62880	GBB2_MOUSE	Gnb2	Guanine nucleotide-binding protein G(I)/G(S)/G(T) subunit beta-2
FAGLNIVDI	F	T	9	2	0.9723	2	0			sp|Q8C5Q4|GRSF1_MOUSE	Q8C5Q4	GRSF1_MOUSE	Grsf1	G-rich sequence factor 1
FAGPKILEL	M	I	9	2	0.9998	5	0			sp|O35379|MRP1_MOUSE	O35379	MRP1_MOUSE	Abcc1	Multidrug resistance-associated protein 1
FAGYNKQNTTL	H	G	11	2	0.9999	2	0			sp|E9Q3L2|PI4KA_MOUSE	E9Q3L2	PI4KA_MOUSE	Pi4ka	Phosphatidylinositol 4-kinase alpha
FAHFNSHAA	N	Q	9	2	0.9683	2	0			sp|Q8K2K6|AGFG1_MOUSE	Q8K2K6	AGFG1_MOUSE	Agfg1	Arf-GAP domain and FG repeat-containing protein 1
FAHIDGDHL	R	T	9	2	0.9999	6	0			sp|O35286|DHX15_MOUSE	O35286	DHX15_MOUSE	Dhx15	ATP-dependent RNA helicase DHX15
FAHPGMMQEL	G	Q	10	2	0.9991	5	0	6M(15.9949), 7M(15.9949)		sp|Q8VBT6|APOBR_MOUSE	Q8VBT6	APOBR_MOUSE	Apobr	Apolipoprotein B receptor
FAHTNIESL	R	V	9	2	0.9892	10	0			sp|P27773|PDIA3_MOUSE	P27773	PDIA3_MOUSE	Pdia3	Protein disulfide-isomerase A3
FAHTNIESLV	R	K	10	2	0.7807	1	0			sp|P27773|PDIA3_MOUSE	P27773	PDIA3_MOUSE	Pdia3	Protein disulfide-isomerase A3
FAIDDHDYL	R	V	9	2	1	33	0			sp|Q91XU3|PI42C_MOUSE	Q91XU3	PI42C_MOUSE	Pip4k2c	Phosphatidylinositol 5-phosphate 4-kinase type-2 gamma
FAIINSNPIEL	L	A	11	2	0.9982	3	0			sp|O70472|TM131_MOUSE	O70472	TM131_MOUSE	Tmem131	Transmembrane protein 131
FAILIHDVL	S	L	9	2	0.9852	1	0			sp|O70472|TM131_MOUSE	O70472	TM131_MOUSE	Tmem131	Transmembrane protein 131
FAINNSKSF	V	A	9	2	0.9989	1	0			sp|P08556|RASN_MOUSE	P08556	RASN_MOUSE	Nras	GTPase NRas
FAIPLIEKL	S	Q	9	2	0.9927	1	0			sp|Q9JIK5|DDX21_MOUSE	Q9JIK5	DDX21_MOUSE	Ddx21	Nucleolar RNA helicase 2
FAIPMIHSV	A	L	9	2	0.8056	1	0	5M(15.9949)		sp|Q9ESV0|DDX24_MOUSE	Q9ESV0	DDX24_MOUSE	Ddx24	ATP-dependent RNA helicase DDX24
FAIQNPTLI	V	N	9	2	0.9882	4	0			sp|Q9D2H6|SP2_MOUSE	Q9D2H6	SP2_MOUSE	Sp2	Transcription factor Sp2
FAIRNILDYV	K	T	10	2	0.9925	2	0			sp|Q8CAS9|PARP9_MOUSE	Q8CAS9	PARP9_MOUSE	Parp9	Protein mono-ADP-ribosyltransferase PARP9
FAISILQQL	T	E	9	2	0.9981	6	0			sp|P10630|IF4A2_MOUSE	P10630	IF4A2_MOUSE	Eif4a2	Eukaryotic initiation factor 4A-II
FALANEHYL	T	E	9	2	0.9996	3	0			sp|Q8BH82|NAPEP_MOUSE	Q8BH82	NAPEP_MOUSE	Napepld	N-acyl-phosphatidylethanolamine-hydrolyzing phospholipase D
FALANHLIKV	E	K	10	2	1	6	0			sp|Q9WVK4|EHD1_MOUSE	Q9WVK4	EHD1_MOUSE	Ehd1	EH domain-containing protein 1	Ehd3	sp|Q9QXY6|EHD3_MOUSE
FALELFQTL	L	N	9	2	0.9851	2	0			sp|Q9D154|ILEUA_MOUSE	Q9D154	ILEUA_MOUSE	Serpinb1a	Leukocyte elastase inhibitor A
FALELQHAL	A	S	9	2	0.9888	1	0			sp|A2AJ88|PLPL7_MOUSE	A2AJ88	PLPL7_MOUSE	Pnpla7	Patatin-like phospholipase domain-containing protein 7
FALINKLDI	D	K	9	2	0.9995	14	0			sp|Q9Z2A5|ATE1_MOUSE	Q9Z2A5	ATE1_MOUSE	Ate1	Arginyl-tRNA--protein transferase 1
FALKNPFYSL	D	E	10	2	0.9979	12	0			sp|Q9ES56|TPPC4_MOUSE	Q9ES56	TPPC4_MOUSE	Trappc4	Trafficking protein particle complex subunit 4
FALKSLTYL	P	A	9	2	0.9615	1	0			sp|O70281|TPST1_MOUSE	O70281	TPST1_MOUSE	Tpst1	Protein-tyrosine sulfotransferase 1
FALNNPEMV	R	E	9	2	1	44	0	8M(15.9949)		sp|Q62433|NDRG1_MOUSE	Q62433	NDRG1_MOUSE	Ndrg1	Protein NDRG1
FALQHADSSNF	Y	Y	11	2	0.8294	1	0			sp|Q8BPU7|ELMO1_MOUSE	Q8BPU7	ELMO1_MOUSE	Elmo1	Engulfment and cell motility protein 1
FALRYALL	A	P	8	2	0.9753	1	0			sp|P70699|LYAG_MOUSE	P70699	LYAG_MOUSE	Gaa	Lysosomal alpha-glucosidase
FALSNEHYSL	E	S	10	2	0.9986	4	0			sp|Q8R4U7|LUZP1_MOUSE	Q8R4U7	LUZP1_MOUSE	Luzp1	Leucine zipper protein 1
FALTLQETL	N	K	9	2	0.9988	18	0			sp|Q3TGW2|EEPD1_MOUSE	Q3TGW2	EEPD1_MOUSE	Eepd1	Endonuclease/exonuclease/phosphatase family domain-containing protein 1
FALTNPEKSI	N	H	10	2	0.9849	3	0			sp|Q9EPK6|SIL1_MOUSE	Q9EPK6	SIL1_MOUSE	Sil1	Nucleotide exchange factor SIL1
FALVFKSV	A	H	8	2	0.9531	1	0			sp|P47856|GFPT1_MOUSE	P47856	GFPT1_MOUSE	Gfpt1	Glutamine--fructose-6-phosphate aminotransferase [isomerizing] 1
FALVNGNNI	S	R	9	2	0.9999	8	0			sp|P22892|AP1G1_MOUSE	P22892	AP1G1_MOUSE	Ap1g1	AP-1 complex subunit gamma-1
FALVPAAEI	V	R	9	2	0.9947	1	0			sp|Q8R1F6|HID1_MOUSE	Q8R1F6	HID1_MOUSE	Hid1	Protein HID1
FALYNAANL	G	K	9	2	0.9972	1	0			sp|E2JF22|PIEZ1_MOUSE	E2JF22	PIEZ1_MOUSE	Piezo1	Piezo-type mechanosensitive ion channel component 1
FAMDVYKNL	D	Y	9	2	0.9824	1	0	3M(15.9949)		sp|P60229|EIF3E_MOUSE	P60229	EIF3E_MOUSE	Eif3e	Eukaryotic translation initiation factor 3 subunit E
FANKQDLPNAM	L	A	11	2	0.9999	2	0	11M(15.9949)		sp|P61750|ARF4_MOUSE	P61750	ARF4_MOUSE	Arf4	ADP-ribosylation factor 4	Arf1, Arf3	sp|P61205|ARF3_MOUSE, sp|P84078|ARF1_MOUSE
FAPIYADL	S	S	8	2	0.9946	12	0			sp|Q9D710|TMX2_MOUSE	Q9D710	TMX2_MOUSE	Tmx2	Thioredoxin-related transmembrane protein 2
FAPKNIYSI	V	M	9	2	0.9967	16	0			sp|P09581|CSF1R_MOUSE	P09581	CSF1R_MOUSE	Csf1r	Macrophage colony-stimulating factor 1 receptor
FAPKNIYSIM	V	Q	10	2	0.8222	1	0	10M(15.9949)		sp|P09581|CSF1R_MOUSE	P09581	CSF1R_MOUSE	Csf1r	Macrophage colony-stimulating factor 1 receptor
FAPKSWMEDSL	A	N	11	2	0.9867	1	0	7M(15.9949)		sp|Q7TN98|CPEB4_MOUSE	Q7TN98	CPEB4_MOUSE	Cpeb4	Cytoplasmic polyadenylation element-binding protein 4
FAPNSVHYL	E	L	9	2	0.9963	9	0			sp|Q9EPK7|XPO7_MOUSE	Q9EPK7	XPO7_MOUSE	Xpo7	Exportin-7	Ranbp17	sp|Q99NF8|RBP17_MOUSE
FAPPNISDM	I	E	9	2	0.9986	5	0	9M(15.9949)		sp|Q9WV55|VAPA_MOUSE	Q9WV55	VAPA_MOUSE	Vapa	Vesicle-associated membrane protein-associated protein A
FAPPQGSPVM	Q	G	10	2	0.9999	15	0	10M(15.9949)		sp|Q8CFE4|SCYL2_MOUSE	Q8CFE4	SCYL2_MOUSE	Scyl2	SCY1-like protein 2
FAPRDPIPYL	L	P	10	2	0.999	17	0			sp|Q62376|RU17_MOUSE	Q62376	RU17_MOUSE	Snrnp70	U1 small nuclear ribonucleoprotein 70 kDa
FAPSKGSVTL	E	S	10	2	0.9912	2	0			sp|Q8K298|ANLN_MOUSE	Q8K298	ANLN_MOUSE	Anln	Anillin
FAPSTVIFHL	T	G	10	2	0.9997	4	0			sp|Q9DBG6|RPN2_MOUSE	Q9DBG6	RPN2_MOUSE	Rpn2	Dolichyl-diphosphooligosaccharide--protein glycosyltransferase subunit 2
FAPVNVTTE	T	V	9	2	0.9961	1	0			sp|P10126|EF1A1_MOUSE	P10126	EF1A1_MOUSE	Eef1a1	Elongation factor 1-alpha 1
FAPVNVTTEV	T	K	10	2	1	26	0			sp|P10126|EF1A1_MOUSE	P10126	EF1A1_MOUSE	Eef1a1	Elongation factor 1-alpha 1
FAPVNVTTEVK	T	S	11	2	1	12	0			sp|P10126|EF1A1_MOUSE	P10126	EF1A1_MOUSE	Eef1a1	Elongation factor 1-alpha 1
FAPVNVTTEVKS	T	V	12	2	0.9194	1	0			sp|P10126|EF1A1_MOUSE	P10126	EF1A1_MOUSE	Eef1a1	Elongation factor 1-alpha 1
FAPVNVTTEVKSV	T	E	13	2	1	1	0			sp|P10126|EF1A1_MOUSE	P10126	EF1A1_MOUSE	Eef1a1	Elongation factor 1-alpha 1
FAPVNVTTEVKSVE	T	M	14	2	1	6	0			sp|P10126|EF1A1_MOUSE	P10126	EF1A1_MOUSE	Eef1a1	Elongation factor 1-alpha 1
FAPVNVTTEVKSVEM	T	H	15	3	1	4	0	15M(15.9949)		sp|P10126|EF1A1_MOUSE	P10126	EF1A1_MOUSE	Eef1a1	Elongation factor 1-alpha 1
FAPVYPIM	E	V	8	2	0.9839	2	0	8M(15.9949)		sp|Q8C0L8|COG5_MOUSE	Q8C0L8	COG5_MOUSE	Cog5	Conserved oligomeric Golgi complex subunit 5
FAPYNKPSL	A	S	9	2	0.9999	11	0			sp|Q8R3P2|DTX2_MOUSE	Q8R3P2	DTX2_MOUSE	Dtx2	Probable E3 ubiquitin-protein ligase DTX2
FAQEALTVL	Y	S	9	2	0.9899	4	0			sp|Q76MZ3|2AAA_MOUSE	Q76MZ3	2AAA_MOUSE	Ppp2r1a	Serine/threonine-protein phosphatase 2A 65 kDa regulatory subunit A alpha isoform
FAQNNVTEI	Y	Q	9	2	0.989	2	0			sp|Q9WVL3|S12A7_MOUSE	Q9WVL3	S12A7_MOUSE	Slc12a7	Solute carrier family 12 member 7
FAQPPGATNM	Q	I	10	2	0.7532	1	0	10M(15.9949)		sp|Q501J6|DDX17_MOUSE	Q501J6	DDX17_MOUSE	Ddx17	Probable ATP-dependent RNA helicase DDX17
FAQYNLDQF	A	T	9	2	0.9925	1	0			sp|P47754|CAZA2_MOUSE	P47754	CAZA2_MOUSE	Capza2	F-actin-capping protein subunit alpha-2
FARSFALM	N	L	8	2	0.8596	1	0	8M(15.9949)		sp|Q4FZC9|SYNE3_MOUSE	Q4FZC9	SYNE3_MOUSE	Syne3	Nesprin-3
FASFIDK	K	V	7	2	0.7487	1	0			sp|Q6NXH9|K2C73_MOUSE	Q6NXH9	K2C73_MOUSE	Krt73	Keratin, type II cytoskeletal 73	Krt1, Krt2, Krt4, Krt5, Krt6a, Krt6b, Krt7, Krt71, Krt72, Krt74, Krt75, Krt76, Krt77, Krt79, Krt8, Krt84	sp|P04104|K2C1_MOUSE, sp|P07744|K2C4_MOUSE, sp|P11679|K2C8_MOUSE, sp|P50446|K2C6A_MOUSE, sp|Q3TTY5|K22E_MOUSE, sp|Q3UV17|K22O_MOUSE, sp|Q6IFZ6|K2C1B_MOUSE, sp|Q6IFZ9|K2C74_MOUSE, sp|Q6IME9|K2C72_MOUSE, sp|Q8BGZ7|K2C75_MOUSE, sp|Q8VED5|K2C79_MOUSE, sp|Q922U2|K2C5_MOUSE, sp|Q99M73|KRT84_MOUSE, sp|Q9DCV7|K2C7_MOUSE, sp|Q9R0H5|K2C71_MOUSE, sp|Q9Z331|K2C6B_MOUSE
FASFNDTFV	I	H	9	2	0.9165	1	0			sp|P62264|RS14_MOUSE	P62264	RS14_MOUSE	Rps14	40S ribosomal protein S14
FASFNDTFVHV	I	T	11	2	0.9995	1	0			sp|P62264|RS14_MOUSE	P62264	RS14_MOUSE	Rps14	40S ribosomal protein S14
FASFNTYAL	S	Y	9	2	0.734	1	0			sp|Q8VE73|CUL7_MOUSE	Q8VE73	CUL7_MOUSE	Cul7	Cullin-7
FASINPLNGTL	L	K	11	2	0.9998	1	0			sp|B2RRF6|Z518A_MOUSE	B2RRF6	Z518A_MOUSE	Znf518a	Zinc finger protein 518A
FASKPPTTNPFL	A	-	12	2	0.9951	1	0			sp|Q80WC7|AGFG2_MOUSE	Q80WC7	AGFG2_MOUSE	Agfg2	Arf-GAP domain and FG repeat-containing protein 2
FASYGLHTSLL	P	K	11	2	0.9689	1	0			sp|Q6ZPR5|NSMA3_MOUSE	Q6ZPR5	NSMA3_MOUSE	Smpd4	Sphingomyelin phosphodiesterase 4
FATNNSEHI	G	T	9	2	0.9992	2	0			sp|Q6A068|CDC5L_MOUSE	Q6A068	CDC5L_MOUSE	Cdc5l	Cell division cycle 5-like protein
FATNNSEHITYL	G	E	12	2	0.9998	5	0			sp|Q6A068|CDC5L_MOUSE	Q6A068	CDC5L_MOUSE	Cdc5l	Cell division cycle 5-like protein
FAVENGDSGSRYF	N	F	13	2	0.9969	1	0			sp|Q8VEB2|SAV1_MOUSE	Q8VEB2	SAV1_MOUSE	Sav1	Protein salvador homolog 1
FAVISRHSL	L	S	9	2	0.7795	1	0			sp|O35379|MRP1_MOUSE	O35379	MRP1_MOUSE	Abcc1	Multidrug resistance-associated protein 1
FAVVNHQGTL	L	E	10	2	1	3	0			sp|Q5DU02|UBP22_MOUSE	Q5DU02	UBP22_MOUSE	Usp22	Ubiquitin carboxyl-terminal hydrolase 22	Usp27x	sp|Q8CEG8|UBP27_MOUSE
FAYEGRD	Q	Y	7	2	0.898	1	0			sp|P01899|HA11_MOUSE	P01899	HA11_MOUSE	H2-D1	H-2 class I histocompatibility antigen, D-B alpha chain	H2-Q7, H2-Q8, H2-Q9	sp|P14429|HA17_MOUSE, sp|P14430|HA18_MOUSE, sp|P14431|HA19_MOUSE
FAYEGRDYI	Q	A	9	2	1	48	0			sp|P01899|HA11_MOUSE	P01899	HA11_MOUSE	H2-D1	H-2 class I histocompatibility antigen, D-B alpha chain	H2-Q7, H2-Q8, H2-Q9	sp|P14429|HA17_MOUSE, sp|P14430|HA18_MOUSE, sp|P14431|HA19_MOUSE
FAYEGRDYIA	Q	L	10	2	0.9993	1	0			sp|P01899|HA11_MOUSE	P01899	HA11_MOUSE	H2-D1	H-2 class I histocompatibility antigen, D-B alpha chain	H2-Q7, H2-Q8, H2-Q9	sp|P14429|HA17_MOUSE, sp|P14430|HA18_MOUSE, sp|P14431|HA19_MOUSE
FAYLRDLL	E	I	8	2	0.8497	1	0			sp|Q80UG5|SEPT9_MOUSE	Q80UG5	SEPT9_MOUSE	Septin9	Septin-9
FAYLYYVI	L	S	8	2	0.9202	1	0			sp|P13011|SCD2_MOUSE	P13011	SCD2_MOUSE	Scd2	Stearoyl-CoA desaturase 2
FAYRFSNL	K	L	8	2	1	8	0			sp|Q8BU03|PWP2_MOUSE	Q8BU03	PWP2_MOUSE	Pwp2	Periodic tryptophan protein 2 homolog
FAYRFSNLL	K	G	9	2	0.9868	2	0			sp|Q8BU03|PWP2_MOUSE	Q8BU03	PWP2_MOUSE	Pwp2	Periodic tryptophan protein 2 homolog
FAYTVKYVL	A	R	9	2	0.9998	4	0			sp|Q6P073|UB2J2_MOUSE	Q6P073	UB2J2_MOUSE	Ube2j2	Ubiquitin-conjugating enzyme E2 J2
FDKPVSPL	L	L	8	2	0.9956	3	0			sp|P07310|KCRM_MOUSE	P07310	KCRM_MOUSE	Ckm	Creatine kinase M-type	Ckb, Ckmt1, Ckmt2	sp|P30275|KCRU_MOUSE, sp|Q04447|KCRB_MOUSE, sp|Q6P8J7|KCRS_MOUSE
FDLMYAK	K	R	7	2	0.7776	1	0			sp|P05213|TBA1B_MOUSE	P05213	TBA1B_MOUSE	Tuba1b	Tubulin alpha-1B chain	Tuba1a, Tuba1c, Tuba3b, Tuba4a, Tuba8, Tubal3	sp|P05214|TBA3_MOUSE, sp|P68368|TBA4A_MOUSE, sp|P68369|TBA1A_MOUSE, sp|P68373|TBA1C_MOUSE, sp|Q3UX10|TBAL3_MOUSE, sp|Q9JJZ2|TBA8_MOUSE
FEDENFILK	K	H	9	2	0.9528	1	0			sp|P17742|PPIA_MOUSE	P17742	PPIA_MOUSE	Ppia	Peptidyl-prolyl cis-trans isomerase A
FEFINSL	A	L	7	2	0.9933	6	0			sp|P26673|A47_VACCW	P26673	A47_VACCW	VACWR173	Protein A47
FELILMEE	L	I	8	2	0.7895	1	0	6M(15.9949)		sp|P31750|AKT1_MOUSE	P31750	AKT1_MOUSE	Akt1	RAC-alpha serine/threonine-protein kinase	Akt2	sp|Q60823|AKT2_MOUSE
FELLVKSMAQYVHNL	F	D	15	4	0.9492	1	0	8M(15.9949)		sp|Q8C147|DOCK8_MOUSE	Q8C147	DOCK8_MOUSE	Dock8	Dedicator of cytokinesis protein 8
FELTNVDMI	E	Q	9	2	0.9993	3	0	8M(15.9949)		sp|Q8K1A0|METL5_MOUSE	Q8K1A0	METL5_MOUSE	Mettl5	rRNA N6-adenosine-methyltransferase METTL5
FERFVTM	P	N	7	2	0.881	1	0	7M(15.9949)		sp|Q80YW0|CYH4_MOUSE	Q80YW0	CYH4_MOUSE	Cyth4	Cytohesin-4
FETEQALR	K	M	8	2	0.9898	1	0			sp|Q9QWL7|K1C17_MOUSE	Q9QWL7	K1C17_MOUSE	Krt17	Keratin, type I cytoskeletal 17
FFKGFSETL	D	E	9	2	0.9688	1	0			sp|Q80XI3|IF4G3_MOUSE	Q80XI3	IF4G3_MOUSE	Eif4g3	Eukaryotic translation initiation factor 4 gamma 3
FFLINGPEI	F	M	9	2	0.9994	4	0			sp|Q01853|TERA_MOUSE	Q01853	TERA_MOUSE	Vcp	Transitional endoplasmic reticulum ATPase
FFMPGFAPL	H	T	9	2	0.9767	4	0	3M(15.9949)		sp|P68372|TBB4B_MOUSE	P68372	TBB4B_MOUSE	Tubb4b	Tubulin beta-4B chain	Tubb1, Tubb2a, Tubb2b, Tubb3, Tubb4a, Tubb5, Tubb6	sp|A2AQ07|TBB1_MOUSE, sp|P99024|TBB5_MOUSE, sp|Q7TMM9|TBB2A_MOUSE, sp|Q922F4|TBB6_MOUSE, sp|Q9CWF2|TBB2B_MOUSE, sp|Q9D6F9|TBB4A_MOUSE, sp|Q9ERD7|TBB3_MOUSE
FFYSNPHDSL	S	V	10	2	0.9965	2	0			sp|P29352|PTN22_MOUSE	P29352	PTN22_MOUSE	Ptpn22	Tyrosine-protein phosphatase non-receptor type 22
FGATNWDLI	I	G	9	2	0.9828	13	0			sp|Q8BK67|RCC2_MOUSE	Q8BK67	RCC2_MOUSE	Rcc2	Protein RCC2
FGAVGSTLF	G	G	9	2	0.9954	1	0			sp|Q6PFD9|NUP98_MOUSE	Q6PFD9	NUP98_MOUSE	Nup98	Nuclear pore complex protein Nup98-Nup96
FGFAHPGM	G	M	8	2	0.9797	1	0	8M(15.9949)		sp|Q8VBT6|APOBR_MOUSE	Q8VBT6	APOBR_MOUSE	Apobr	Apolipoprotein B receptor
FGFGFGNGM	R	K	9	2	1	2	0	9M(15.9949)		sp|Q9R0L7|AKP8L_MOUSE	Q9R0L7	AKP8L_MOUSE	Akap8l	A-kinase anchor protein 8-like
FGGAMTDATALNI	G	L	13	3	0.8365	1	0	5M(15.9949)		sp|P17439|GBA1_MOUSE	P17439	GBA1_MOUSE	Gba1	Lysosomal acid glucosylceramidase
FGGHNEDFI	C	A	9	2	0.9998	27	0			sp|Q8C6G8|WDR26_MOUSE	Q8C6G8	WDR26_MOUSE	Wdr26	WD repeat-containing protein 26
FGGLNADNI	L	P	9	2	0.9996	1	0			sp|Q80YG3|KLDC1_MOUSE	Q80YG3	KLDC1_MOUSE	Klhdc1	Kelch domain-containing protein 1
FGGSNPFEI	F	F	9	2	0.9929	2	0			sp|Q9D832|DNJB4_MOUSE	Q9D832	DNJB4_MOUSE	Dnajb4	DnaJ homolog subfamily B member 4
FGGSNVHVI	G	L	9	2	0.9998	7	0			sp|P19096|FAS_MOUSE	P19096	FAS_MOUSE	Fasn	Fatty acid synthase
FGIDNFEFI	R	R	9	2	0.9989	27	0			sp|P23298|KPCL_MOUSE	P23298	KPCL_MOUSE	Prkch	Protein kinase C eta type
FGIHNGVETL	Q	D	10	2	0.9994	18	0			sp|Q8C0L9|GPCP1_MOUSE	Q8C0L9	GPCP1_MOUSE	Gpcpd1	Glycerophosphocholine phosphodiesterase GPCPD1
FGIIDVTEV	R	Q	9	2	0.9961	23	0			sp|Q8BGS7|CEPT1_MOUSE	Q8BGS7	CEPT1_MOUSE	Cept1	Choline/ethanolaminephosphotransferase 1
FGIKNFSAI	M	I	9	2	0.9924	2	0			sp|Q8BMF4|ODP2_MOUSE	Q8BMF4	ODP2_MOUSE	Dlat	Dihydrolipoyllysine-residue acetyltransferase component of pyruvate dehydrogenase complex, mitochondrial
FGIKNMDQV	D	A	9	2	0.9985	8	0	6M(15.9949)		sp|P15037|ETS2_MOUSE	P15037	ETS2_MOUSE	Ets2	Protein C-ets-2
FGIKTLEEI	N	K	9	2	0.9388	1	0			sp|Q6NZF1|ZC11A_MOUSE	Q6NZF1	ZC11A_MOUSE	Zc3h11a	Zinc finger CCCH domain-containing protein 11A
FGILGSTTL	F	A	9	2	0.9999	1	0			sp|Q6PGD0|ARAID_MOUSE	Q6PGD0	ARAID_MOUSE	Atraid	All-trans retinoic acid-induced differentiation factor
FGILLDQGQL	Y	N	10	2	0.9979	2	0			sp|Q68FD5|CLH1_MOUSE	Q68FD5	CLH1_MOUSE	Cltc	Clathrin heavy chain 1
FGITNLVEHPA	Y	Q	11	2	0.9999	1	0			sp|Q922U1|PRPF3_MOUSE	Q922U1	PRPF3_MOUSE	Prpf3	U4/U6 small nuclear ribonucleoprotein Prp3
FGLGAEQRPPAA	S	A	12	2	0.9997	1	0			sp|Q9Z103|ADNP_MOUSE	Q9Z103	ADNP_MOUSE	Adnp	Activity-dependent neuroprotector homeobox protein
FGLGNKTYEHFNAM	V	G	14	3	0.9723	1	0	14M(15.9949)		sp|P37040|NCPR_MOUSE	P37040	NCPR_MOUSE	Por	NADPH--cytochrome P450 reductase
FGLHLIDFM	A	S	9	2	0.9992	13	0	9M(15.9949)		sp|Q8C156|CND2_MOUSE	Q8C156	CND2_MOUSE	Ncaph	Condensin complex subunit 2
FGLNNMEEL	F	E	9	2	0.9871	1	0	6M(15.9949)		sp|Q52KR2|LRIG2_MOUSE	Q52KR2	LRIG2_MOUSE	Lrig2	Leucine-rich repeats and immunoglobulin-like domains protein 2
FGLQNFPEL	G	K	9	2	0.9937	2	0			sp|P70697|DCUP_MOUSE	P70697	DCUP_MOUSE	Urod	Uroporphyrinogen decarboxylase
FGLSARDLDEL	S	S	11	2	0.9787	2	0			sp|Q8K310|MATR3_MOUSE	Q8K310	MATR3_MOUSE	Matr3	Matrin-3
FGLSNEDLEEL	S	S	11	2	0.9801	3	0			sp|Q61464|ZN638_MOUSE	Q61464	ZN638_MOUSE	Znf638	Zinc finger protein 638
FGLSNQLVV	R	A	9	2	0.9452	2	0			sp|Q8K595|MCLN2_MOUSE	Q8K595	MCLN2_MOUSE	Mcoln2	Mucolipin-2	Mcoln1	sp|Q99J21|MCLN1_MOUSE
FGLSNYHQL	G	G	9	2	0.9998	2	0			sp|Q8VE37|RCC1_MOUSE	Q8VE37	RCC1_MOUSE	Rcc1	Regulator of chromosome condensation
FGLTLTSYI	S	A	9	2	0.9871	1	0			sp|Q8K411|PREP_MOUSE	Q8K411	PREP_MOUSE	Pitrm1	Presequence protease, mitochondrial
FGLVNQERT	L	S	9	2	0.9962	2	0			sp|Q8R4B8|NLRP3_MOUSE	Q8R4B8	NLRP3_MOUSE	Nlrp3	NACHT, LRR and PYD domains-containing protein 3
FGNLNKVVL	G	C	9	2	0.9993	3	0			sp|Q6ZQ88|KDM1A_MOUSE	Q6ZQ88	KDM1A_MOUSE	Kdm1a	Lysine-specific histone demethylase 1A
FGNVGLHSM	G	R	9	2	0.9993	4	0	9M(15.9949)		sp|P26443|DHE3_MOUSE	P26443	DHE3_MOUSE	Glud1	Glutamate dehydrogenase 1, mitochondrial
FGNVNLGYTL	G	N	10	2	0.9918	2	0			sp|Q64253|LY6E_MOUSE	Q64253	LY6E_MOUSE	Ly6e	Lymphocyte antigen 6E
FGNYNQQPS	D	N	9	2	0.9785	2	0			sp|O88569|ROA2_MOUSE	O88569	ROA2_MOUSE	Hnrnpa2b1	Heterogeneous nuclear ribonucleoproteins A2/B1
FGPINSVAF	H	H	9	2	0.9993	26	0			sp|Q9QZD9|EIF3I_MOUSE	Q9QZD9	EIF3I_MOUSE	Eif3i	Eukaryotic translation initiation factor 3 subunit I
FGPISYVVV	E	M	9	2	0.9316	1	0			sp|Q8R081|HNRPL_MOUSE	Q8R081	HNRPL_MOUSE	Hnrnpl	Heterogeneous nuclear ribonucleoprotein L
FGPTDKEEI	Q	P	9	2	0.9713	2	0			sp|Q9EPL9|ACOX3_MOUSE	Q9EPL9	ACOX3_MOUSE	Acox3	Peroxisomal acyl-coenzyme A oxidase 3
FGPVDHEEL	L	G	9	2	0.975	1	0			sp|P49919|CDN1C_MOUSE	P49919	CDN1C_MOUSE	Cdkn1c	Cyclin-dependent kinase inhibitor 1C
FGPVDSEQL	L	R	9	2	0.9978	2	0			sp|P39689|CDN1A_MOUSE	P39689	CDN1A_MOUSE	Cdkn1a	Cyclin-dependent kinase inhibitor 1
FGPVGLDKM	S	L	9	2	0.9992	2	0	9M(15.9949)		sp|P11983|TCPA_MOUSE	P11983	TCPA_MOUSE	Tcp1	T-complex protein 1 subunit alpha
FGPVNHEEL	L	T	9	2	0.9999	27	0			sp|P46414|CDN1B_MOUSE	P46414	CDN1B_MOUSE	Cdkn1b	Cyclin-dependent kinase inhibitor 1B
FGPVSGAQIQF	P	-	11	2	0.8103	1	0			sp|Q7M6Y3|PICAL_MOUSE	Q7M6Y3	PICAL_MOUSE	Picalm	Phosphatidylinositol-binding clathrin assembly protein
FGPVSGAQIQFM	P	-	12	2	1	6	0	12M(15.9949)		sp|Q7M6Y3|PICAL_MOUSE	Q7M6Y3	PICAL_MOUSE	Picalm	Phosphatidylinositol-binding clathrin assembly protein
FGVDPYNVFM	Y	V	10	2	0.9943	1	0	10M(15.9949)		sp|Q99LI2|CLCC1_MOUSE	Q99LI2	CLCC1_MOUSE	Clcc1	Chloride channel CLIC-like protein 1
FGVKSLVYM	V	L	9	2	0.9981	4	0	9M(15.9949)		sp|O09005|DEGS1_MOUSE	O09005	DEGS1_MOUSE	Degs1	Sphingolipid delta(4)-desaturase DES1
FGVLNVQTV	I	E	9	2	0.9981	4	0			sp|Q9R049|AMFR_MOUSE	Q9R049	AMFR_MOUSE	Amfr	E3 ubiquitin-protein ligase AMFR
FGYEYITV	T	K	8	2	0.9905	6	0			sp|P49282|NRAM2_MOUSE	P49282	NRAM2_MOUSE	Slc11a2	Natural resistance-associated macrophage protein 2
FGYNIPLKHL	N	A	10	3	1	1	0			sp|O70435|PSA3_MOUSE	O70435	PSA3_MOUSE	Psma3	Proteasome subunit alpha type-3
FGYQFTQQ	K	G	8	2	0.8238	1	0			sp|Q9JHJ0|TMOD3_MOUSE	Q9JHJ0	TMOD3_MOUSE	Tmod3	Tropomodulin-3
FGYVYVGL	S	R	8	2	0.9505	2	0			sp|Q80TN4|DJC16_MOUSE	Q80TN4	DJC16_MOUSE	Dnajc16	DnaJ homolog subfamily C member 16
FHAKPSPSTL	L	S	10	2	0.9446	1	0			sp|Q6P5B0|RRP12_MOUSE	Q6P5B0	RRP12_MOUSE	Rrp12	RRP12-like protein
FHHSNIEML	L	S	9	2	0.9885	2	0	8M(15.9949)		sp|Q9Z0F8|ADA17_MOUSE	Q9Z0F8	ADA17_MOUSE	Adam17	Disintegrin and metalloproteinase domain-containing protein 17
FHLQNGAVM	N	W	9	2	0.9847	1	0	9M(15.9949)		sp|Q99J39|DCMC_MOUSE	Q99J39	DCMC_MOUSE	Mlycd	Malonyl-CoA decarboxylase, mitochondrial
FHMDPSGTFV	L	Q	10	2	0.9232	1	0	3M(15.9949)		sp|Q9Z2U1|PSA5_MOUSE	Q9Z2U1	PSA5_MOUSE	Psma5	Proteasome subunit alpha type-5
FHSGTPAASF	G	N	10	2	0.9985	4	0			sp|Q80X50|UBP2L_MOUSE	Q80X50	UBP2L_MOUSE	Ubap2l	Ubiquitin-associated protein 2-like
FHVQNIDLL	E	H	9	2	0.9894	9	0			sp|Q4QY64|ATAD5_MOUSE	Q4QY64	ATAD5_MOUSE	Atad5	ATPase family AAA domain-containing protein 5
FIAQNKYLL	D	A	9	2	0.9908	1	0			sp|Q80TN4|DJC16_MOUSE	Q80TN4	DJC16_MOUSE	Dnajc16	DnaJ homolog subfamily C member 16
FIFSDLEYM	T	G	9	2	0.9932	1	0	9M(15.9949)		sp|P32921|SYWC_MOUSE	P32921	SYWC_MOUSE	Wars1	Tryptophan--tRNA ligase, cytoplasmic
FIFSHDLSNGAM	R	N	12	2	1	1	0	12M(15.9949)		sp|Q8VDL4|ADPGK_MOUSE	Q8VDL4	ADPGK_MOUSE	Adpgk	ADP-dependent glucokinase
FIGLGNMGNPM	G	A	11	2	0.9873	1	0	11M(15.9949), 7M(15.9949)		sp|Q99L13|3HIDH_MOUSE	Q99L13	3HIDH_MOUSE	Hibadh	3-hydroxyisobutyrate dehydrogenase, mitochondrial
FIGMESAGIH	S	E	10	2	0.9766	2	0	4M(15.9949)		sp|P68033|ACTC_MOUSE	P68033	ACTC_MOUSE	Actc1	Actin, alpha cardiac muscle 1	Acta1, Acta2, Actg2	sp|P62737|ACTA_MOUSE, sp|P63268|ACTH_MOUSE, sp|P68134|ACTS_MOUSE
FIHEVNPSSL	I	C	10	2	0.9994	11	0			sp|Q61207|SAP_MOUSE	Q61207	SAP_MOUSE	Psap	Prosaposin
FIHNNLKDVYI	Q	S	11	3	0.9723	2	0			sp|O89032|SPD2A_MOUSE	O89032	SPD2A_MOUSE	Sh3pxd2a	SH3 and PX domain-containing protein 2A
FIIDNTKGQTL	K	G	11	2	0.9931	1	0			sp|P27612|PLAP_MOUSE	P27612	PLAP_MOUSE	Plaa	Phospholipase A-2-activating protein
FIIDPAAVIR	T	-	10	2	0.9955	9	0			iRT-pepK	iRT-pepK	iRT-pepK		iRT-pepK
FIIDPGGVIR	T	-	10	2	0.9597	10	0			iRT-pepI	iRT-pepI	iRT-pepI		iRT-pepI
FIIQFLK	S	M	7	2	0.9415	2	0			sp|O88520|SHOC2_MOUSE	O88520	SHOC2_MOUSE	Shoc2	Leucine-rich repeat protein SHOC-2
FILDPNQENVL	E	E	11	2	0.9999	5	0			sp|P47713|PA24A_MOUSE	P47713	PA24A_MOUSE	Pla2g4a	Cytosolic phospholipase A2
FILKNFPAL	N	L	9	2	0.8725	2	0			sp|Q6ZPT1|KLHL9_MOUSE	Q6ZPT1	KLHL9_MOUSE	Klhl9	Kelch-like protein 9
FILTHVDQL	E	F	9	2	0.9653	1	0			sp|Q640N3|RHG30_MOUSE	Q640N3	RHG30_MOUSE	Arhgap30	Rho GTPase-activating protein 30
FIMTNVDQI	E	S	9	2	0.9974	3	0	3M(15.9949)		sp|Q9D3J9|TASL_MOUSE	Q9D3J9	TASL_MOUSE	Tasl	TLR adapter interacting with SLC15A4 on the lysosome
FIQPMAL	L	A	7	2	0.9945	5	0	5M(15.9949)		sp|P00848|ATP6_MOUSE	P00848	ATP6_MOUSE	Mtatp6	ATP synthase subunit a
FIRGGNKM	I	I	8	2	0.9306	1	0	8M(15.9949)		sp|P80316|TCPE_MOUSE	P80316	TCPE_MOUSE	Cct5	T-complex protein 1 subunit epsilon
FIRNQEQM	E	K	8	2	0.9996	7	0	8M(15.9949)		sp|P62192|PRS4_MOUSE	P62192	PRS4_MOUSE	Psmc1	26S proteasome regulatory subunit 4
FISDNVDHI	G	D	9	2	0.9936	1	0			sp|Q8R2U7|LRC42_MOUSE	Q8R2U7	LRC42_MOUSE	Lrrc42	Leucine-rich repeat-containing protein 42
FIVLSQAGL	I	D	9	2	0.9987	29	0	6Q(0.9840)		sp|P23373|E10_VACCW	P23373	E10_VACCW	VACWR066	Probable FAD-linked sulfhydryl oxidase E10
FKASYPSAI	D	N	9	2	0.7398	1	0			sp|Q3UMB5|SMCR8_MOUSE	Q3UMB5	SMCR8_MOUSE	Smcr8	Guanine nucleotide exchange protein SMCR8
FKDENQQFL	S	K	9	2	0.9999	2	0			sp|A0A0G2JDV3|GBP6_MOUSE	A0A0G2JDV3	GBP6_MOUSE	Gbp6	Guanylate-binding protein 6
FKFSLPQL	Y	P	8	2	0.9862	2	0			sp|Q3V3N7|BBS1_MOUSE	Q3V3N7	BBS1_MOUSE	Bbs1	Bardet-Biedl syndrome 1 protein homolog
FKKTVAM	I	H	7	2	0.8149	1	0	7M(15.9949)		sp|Q6P8X1|SNX6_MOUSE	Q6P8X1	SNX6_MOUSE	Snx6	Sorting nexin-6	Snx32	sp|Q80ZJ7|SNX32_MOUSE
FKLILAE	S	Y	7	2	0.9444	4	0			sp|P26672|A46_VACCW	P26672	A46_VACCW	VACWR172	Protein A46		rev_sp|Q9D799|FMT_MOUSE
FKLILAEYI	S	R	9	2	0.999	34	0			sp|P26672|A46_VACCW	P26672	A46_VACCW	VACWR172	Protein A46
FKMEVGQYI	G	F	9	2	0.9986	3	0	3M(15.9949)		sp|Q61093|CY24B_MOUSE	Q61093	CY24B_MOUSE	Cybb	Cytochrome b-245 heavy chain
FKNLATSI	L	Y	8	2	0.999	4	0			sp|P16715|P4A_VACCW	P16715	P4A_VACCW	VACWR129	Major core protein 4a precursor
FLINGPEI	F	M	8	2	0.9818	2	0			sp|Q01853|TERA_MOUSE	Q01853	TERA_MOUSE	Vcp	Transitional endoplasmic reticulum ATPase
FLKSNFEYL	L	R	9	2	0.9748	2	0			sp|Q8BH15|CNO10_MOUSE	Q8BH15	CNO10_MOUSE	Cnot10	CCR4-NOT transcription complex subunit 10
FLLPAKQI	G	L	8	2	0.9808	2	0			sp|Q504N0|CBPA2_MOUSE	Q504N0	CBPA2_MOUSE	Cpa2	Carboxypeptidase A2
FLLQNKSSM	E	V	9	2	0.8867	1	0	9M(15.9949)		sp|Q99P69|NUF2_MOUSE	Q99P69	NUF2_MOUSE	Nuf2	Kinetochore protein Nuf2
FLLVNGHSM	F	V	9	2	0.9981	2	0	9M(15.9949)		sp|Q9CQV6|MLP3B_MOUSE	Q9CQV6	MLP3B_MOUSE	Map1lc3b	Microtubule-associated proteins 1A/1B light chain 3B
FLMMNKD	R	E	7	2	0.9661	6	0	3M(15.9949), 4M(15.9949)		sp|P14357|N2_VACCW	P14357	N2_VACCW	VACWR029	Protein N2
FLMMNKDE	R	L	8	2	0.999	4	0	3M(15.9949), 4M(15.9949)		sp|P14357|N2_VACCW	P14357	N2_VACCW	VACWR029	Protein N2
FLMMNKDEL	R	N	9	2	1	433	0	3M(15.9949), 4M(15.9949), 5N(0.9840)		sp|P14357|N2_VACCW	P14357	N2_VACCW	VACWR029	Protein N2
FLMMNKDELN	R	N	10	2	0.9552	4	0	10N(0.9840)		sp|P14357|N2_VACCW	P14357	N2_VACCW	VACWR029	Protein N2
FLNGLTGKPVM	P	V	11	2	0.9785	1	0	11M(15.9949)		sp|P62307|RUXF_MOUSE	P62307	RUXF_MOUSE	Snrpf	Small nuclear ribonucleoprotein F
FLQNFHDPL	P	T	9	2	0.9999	3	0			sp|Q5DTV4|ZC12C_MOUSE	Q5DTV4	ZC12C_MOUSE	Zc3h12c	Probable ribonuclease ZC3H12C
FLQNSTHL	D	K	8	2	0.8338	1	0			sp|Q91W96|APC4_MOUSE	Q91W96	APC4_MOUSE	Anapc4	Anaphase-promoting complex subunit 4
FLSRLPLP	D	S	8	2	0.8275	1	0			sp|P97929|BRCA2_MOUSE	P97929	BRCA2_MOUSE	Brca2	Breast cancer type 2 susceptibility protein homolog
FLVANATHI	P	Y	9	2	0.939	1	0			sp|Q8BJ56|PLPL2_MOUSE	Q8BJ56	PLPL2_MOUSE	Pnpla2	Patatin-like phospholipase domain-containing protein 2
FLVQNIHTL	K	A	9	2	0.9993	8	0			sp|Q9DCA5|BRX1_MOUSE	Q9DCA5	BRX1_MOUSE	Brix1	Ribosome biogenesis protein BRX1 homolog
FMATNPEHL	D	E	9	2	0.9998	13	0	2M(15.9949)		sp|Q2HXL6|EDEM3_MOUSE	Q2HXL6	EDEM3_MOUSE	Edem3	ER degradation-enhancing alpha-mannosidase-like protein 3
FMATNPEHLEI	D	L	11	2	0.8882	1	0	2M(15.9949)		sp|Q2HXL6|EDEM3_MOUSE	Q2HXL6	EDEM3_MOUSE	Edem3	ER degradation-enhancing alpha-mannosidase-like protein 3
FMATNSLHL	Y	T	9	2	0.994	4	0	2M(15.9949)		sp|Q9QWV9|CCNT1_MOUSE	Q9QWV9	CCNT1_MOUSE	Ccnt1	Cyclin-T1	Ccnt2	sp|Q7TQK0|CCNT2_MOUSE
FMFNIADGGFTEL	R	H	13	2	1	16	0	2M(15.9949)		sp|Q6PDQ2|CHD4_MOUSE	Q6PDQ2	CHD4_MOUSE	Chd4	Chromodomain-helicase-DNA-binding protein 4	Chd5	sp|A2A8L1|CHD5_MOUSE
FMGSNPSYYQL	L	S	11	2	0.9873	1	0	2M(15.9949)		sp|Q99NG0|ARIP4_MOUSE	Q99NG0	ARIP4_MOUSE	Rad54l2	Helicase ARIP4
FMGVNMDVI	E	S	9	2	0.9915	2	0	2M(15.9949), 6M(15.9949)		sp|Q3TIR3|RIC8A_MOUSE	Q3TIR3	RIC8A_MOUSE	Ric8a	Synembryn-A
FMHVQLEVM	S	V	9	2	0.9852	1	0	2M(15.9949), 9M(15.9949)		sp|Q8K297|GT251_MOUSE	Q8K297	GT251_MOUSE	Colgalt1	Procollagen galactosyltransferase 1
FMIGNGENL	K	V	9	2	0.9941	1	0	2M(15.9949)		sp|Q9R1J0|NSDHL_MOUSE	Q9R1J0	NSDHL_MOUSE	Nsdhl	Sterol-4-alpha-carboxylate 3-dehydrogenase, decarboxylating
FMISHLDYL	D	V	9	2	0.9995	6	0	2M(15.9949)		sp|Q62388|ATM_MOUSE	Q62388	ATM_MOUSE	Atm	Serine-protein kinase ATM
FMKNFLEM	A	H	8	2	0.9835	7	0	2M(15.9949), 8M(15.9949)		sp|Q99K85|SERC_MOUSE	Q99K85	SERC_MOUSE	Psat1	Phosphoserine aminotransferase
FMKSQGLSQL	K	Y	10	2	0.9276	1	0	2M(15.9949)		sp|Q62448|IF4G2_MOUSE	Q62448	IF4G2_MOUSE	Eif4g2	Eukaryotic translation initiation factor 4 gamma 2
FMLALKENI	S	K	9	2	0.9994	8	0	2M(15.9949)		sp|Q9Z207|DIAP3_MOUSE	Q9Z207	DIAP3_MOUSE	Diaph3	Protein diaphanous homolog 3
FMLLFKDAI	A	R	9	2	0.998	1	0	2M(15.9949)		sp|Q7M6Y3|PICAL_MOUSE	Q7M6Y3	PICAL_MOUSE	Picalm	Phosphatidylinositol-binding clathrin assembly protein
FMLSKVIEL	L	M	9	2	0.9987	4	0	2M(15.9949)		sp|Q9JLJ5|ELOV1_MOUSE	Q9JLJ5	ELOV1_MOUSE	Elovl1	Elongation of very long chain fatty acids protein 1
FMMVDQENI	Q	D	9	2	0.983	2	0	2M(15.9949), 3M(15.9949)		sp|Q9WVM1|RGAP1_MOUSE	Q9WVM1	RGAP1_MOUSE	Racgap1	Rac GTPase-activating protein 1
FMNRPAPESL	D	M	10	2	0.9981	3	0	2M(15.9949)		sp|Q8BZS9|DHX32_MOUSE	Q8BZS9	DHX32_MOUSE	Dhx32	Putative pre-mRNA-splicing factor ATP-dependent RNA helicase DHX32
FMPGFAPL	F	T	8	2	0.8602	2	0	2M(15.9949)		sp|P68372|TBB4B_MOUSE	P68372	TBB4B_MOUSE	Tubb4b	Tubulin beta-4B chain	Tubb1, Tubb2a, Tubb2b, Tubb3, Tubb4a, Tubb5, Tubb6	sp|A2AQ07|TBB1_MOUSE, sp|P99024|TBB5_MOUSE, sp|Q7TMM9|TBB2A_MOUSE, sp|Q922F4|TBB6_MOUSE, sp|Q9CWF2|TBB2B_MOUSE, sp|Q9D6F9|TBB4A_MOUSE, sp|Q9ERD7|TBB3_MOUSE
FMPPGLQEL	E	I	9	2	0.7853	1	0	2M(15.9949)		sp|P26638|SYSC_MOUSE	P26638	SYSC_MOUSE	Sars1	Serine--tRNA ligase, cytoplasmic
FMRTDMLQNM	P	F	10	2	1	79	0	10M(15.9949), 2M(15.9949), 6M(15.9949)		sp|P07396|F17_VACCW	P07396	F17_VACCW	VACWR056	Phosphoprotein F17
FMSPETLPSL	A	G	10	2	0.9988	1	0	2M(15.9949)		sp|Q61818|RAI1_MOUSE	Q61818	RAI1_MOUSE	Rai1	Retinoic acid-induced protein 1
FMSRTNRPPL	L	S	10	3	0.9992	8	0	2M(15.9949)		sp|P35980|RL18_MOUSE	P35980	RL18_MOUSE	Rpl18	60S ribosomal protein L18
FMVEKGPTL	S	G	9	2	1	21	0	2M(15.9949)		sp|Q6P073|UB2J2_MOUSE	Q6P073	UB2J2_MOUSE	Ube2j2	Ubiquitin-conjugating enzyme E2 J2
FMYQVDTLKDM	N	L	11	2	0.8094	1	0	11M(15.9949), 2M(15.9949)		sp|Q3UZ39|LRRF1_MOUSE	Q3UZ39	LRRF1_MOUSE	Lrrfip1	Leucine-rich repeat flightless-interacting protein 1
FMYTTPFTL	R	E	9	2	0.9977	2	0	2M(15.9949)		sp|Q8C147|DOCK8_MOUSE	Q8C147	DOCK8_MOUSE	Dock8	Dedicator of cytokinesis protein 8
FMYYGLSNF	V	Y	9	2	0.9951	1	0	2M(15.9949)		sp|Q8VEK0|CC50A_MOUSE	Q8VEK0	CC50A_MOUSE	Tmem30a	Cell cycle control protein 50A
FNGMQAMPL	V	Y	9	2	0.7727	1	0	5Q(0.9840), 7M(15.9949)		sp|Q8CAS9|PARP9_MOUSE	Q8CAS9	PARP9_MOUSE	Parp9	Protein mono-ADP-ribosyltransferase PARP9
FNGTFVKL	I	N	8	2	0.9919	1	0			sp|P14148|RL7_MOUSE	P14148	RL7_MOUSE	Rpl7	60S ribosomal protein L7
FNIRVATI	C	A	8	2	0.9996	14	0			sp|Q61168|LAPM5_MOUSE	Q61168	LAPM5_MOUSE	Laptm5	Lysosomal-associated transmembrane protein 5
FNKLNLEHI	I	A	9	2	0.9884	2	0			sp|Q9EQH3|VPS35_MOUSE	Q9EQH3	VPS35_MOUSE	Vps35	Vacuolar protein sorting-associated protein 35
FNLENVTVF	Q	N	9	2	0.9319	3	0			sp|Q8R3N6|THOC1_MOUSE	Q8R3N6	THOC1_MOUSE	Thoc1	THO complex subunit 1
FNLVFERL	G	C	8	2	0.9681	3	0			sp|Q91ZU1|ASB6_MOUSE	Q91ZU1	ASB6_MOUSE	Asb6	Ankyrin repeat and SOCS box protein 6
FNLVNNALL	E	S	9	2	0.9914	6	0			sp|O35841|API5_MOUSE	O35841	API5_MOUSE	Api5	Apoptosis inhibitor 5
FNPELITHI	T	L	9	2	0.9563	2	0			sp|Q9R0H0|ACOX1_MOUSE	Q9R0H0	ACOX1_MOUSE	Acox1	Peroxisomal acyl-coenzyme A oxidase 1
FNQEVIVL	G	S	8	2	1	1	0			sp|Q3V1G4|OLM2B_MOUSE	Q3V1G4	OLM2B_MOUSE	Olfml2b	Olfactomedin-like protein 2B
FNQKSKEL	W	T	8	2	0.8276	1	0	3Q(0.9840)		sp|P02535|K1C10_MOUSE	P02535	K1C10_MOUSE	Krt10	Keratin, type I cytoskeletal 10
FNSSKDVAVM	D	Q	10	2	0.9998	3	0	10M(15.9949)		sp|Q8CIE6|COPA_MOUSE	Q8CIE6	COPA_MOUSE	Copa	Coatomer subunit alpha
FNSTNKYQL	P	S	9	2	0.9984	1	0			sp|Q6PIC6|AT1A3_MOUSE	Q6PIC6	AT1A3_MOUSE	Atp1a3	Sodium/potassium-transporting ATPase subunit alpha-3	Atp1a1, Atp1a2	sp|Q6PIE5|AT1A2_MOUSE, sp|Q8VDN2|AT1A1_MOUSE
FNVDRHVGM	L	A	9	2	1	4	0	9M(15.9949)		sp|O70435|PSA3_MOUSE	O70435	PSA3_MOUSE	Psma3	Proteasome subunit alpha type-3
FNVINGGSHA	A	G	10	2	0.9942	3	0			sp|P17182|ENOA_MOUSE	P17182	ENOA_MOUSE	Eno1	Alpha-enolase	Eno2, Eno3	sp|P17183|ENOG_MOUSE, sp|P21550|ENOB_MOUSE
FNVSNSSAL	L	N	9	2	0.9995	3	0			sp|Q99MU3|DSRAD_MOUSE	Q99MU3	DSRAD_MOUSE	Adar	Double-stranded RNA-specific adenosine deaminase
FNYGFEYL	K	G	8	2	0.8713	2	0			sp|Q9JHU4|DYHC1_MOUSE	Q9JHU4	DYHC1_MOUSE	Dync1h1	Cytoplasmic dynein 1 heavy chain 1
FNYKGKNV	I	L	8	2	0.8381	1	0			sp|P14211|CALR_MOUSE	P14211	CALR_MOUSE	Calr	Calreticulin
FPDFIVR	Y	P	7	2	0.9266	2	0			sp|Q8CD54|PIEZ2_MOUSE	Q8CD54	PIEZ2_MOUSE	Piezo2	Piezo-type mechanosensitive ion channel component 2
FPLTTEIL	P	E	8	2	0.7775	1	0			sp|Q91YX0|THMS2_MOUSE	Q91YX0	THMS2_MOUSE	Themis2	Protein THEMIS2
FPSFVRL	L	D	7	2	0.9998	67	0			sp|P68609|RP22_VACCW	P68609	RP22_VACCW	RPO22	DNA-directed RNA polymerase 22 kDa subunit
FQAEGITHM	Y	L	9	2	0.9977	1	0	9M(15.9949)		sp|P58681|TLR7_MOUSE	P58681	TLR7_MOUSE	Tlr7	Toll-like receptor 7
FQAHGLPEV	P	S	9	2	0.9812	2	0			sp|Q80XC3|US6NL_MOUSE	Q80XC3	US6NL_MOUSE	Usp6nl	USP6 N-terminal-like protein
FQAINAGHI	I	Q	9	2	0.9998	7	0			sp|Q0VGY8|TANC1_MOUSE	Q0VGY8	TANC1_MOUSE	Tanc1	Protein TANC1
FQALNAEKL	K	A	9	2	0.9997	3	0			sp|Q9JKK8|ATR_MOUSE	Q9JKK8	ATR_MOUSE	Atr	Serine/threonine-protein kinase ATR
FQAMNKEL	L	I	8	2	0.9984	2	0	4M(15.9949)		sp|E9Q557|DESP_MOUSE	E9Q557	DESP_MOUSE	Dsp	Desmoplakin
FQAQLQQEM	H	R	9	2	0.9834	1	0	9M(15.9949)		sp|Q9D4H2|GCC1_MOUSE	Q9D4H2	GCC1_MOUSE	Gcc1	GRIP and coiled-coil domain-containing protein 1
FQEENTENL	F	K	9	2	0.9923	5	0			sp|Q9D8W5|PSD12_MOUSE	Q9D8W5	PSD12_MOUSE	Psmd12	26S proteasome non-ATPase regulatory subunit 12
FQEMNIELI	L	P	9	2	0.9967	14	0	4M(15.9949)		sp|Q9Z2N8|ACL6A_MOUSE	Q9Z2N8	ACL6A_MOUSE	Actl6a	Actin-like protein 6A
FQFIFASM	G	Q	8	2	0.9994	4	0	8M(15.9949)		sp|Q6NZJ6|IF4G1_MOUSE	Q6NZJ6	IF4G1_MOUSE	Eif4g1	Eukaryotic translation initiation factor 4 gamma 1
FQFINPTTI	S	T	9	2	0.9997	19	0			sp|Q8C0M0|WDR59_MOUSE	Q8C0M0	WDR59_MOUSE	Wdr59	GATOR complex protein WDR59
FQFTFKHL	G	D	8	2	0.9957	2	0			sp|Q9QYJ0|DNJA2_MOUSE	Q9QYJ0	DNJA2_MOUSE	Dnaja2	DnaJ homolog subfamily A member 2
FQFVGIENI	R	H	9	2	0.9992	2	0			sp|Q8VE11|MTMR6_MOUSE	Q8VE11	MTMR6_MOUSE	Mtmr6	Myotubularin-related protein 6
FQGKNLETV	T	K	9	2	0.9994	4	0			sp|B2RXS4|PLXB2_MOUSE	B2RXS4	PLXB2_MOUSE	Plxnb2	Plexin-B2
FQGQNGNYT	R	R	9	2	0.98	1	0			sp|Q9D8P4|RM17_MOUSE	Q9D8P4	RM17_MOUSE	Mrpl17	39S ribosomal protein L17, mitochondrial
FQGSNGTVL	L	Y	9	2	0.9973	5	0			sp|Q8K4J0|DCR1C_MOUSE	Q8K4J0	DCR1C_MOUSE	Dclre1c	Protein artemis
FQGTNLFLV	S	A	9	2	0.9018	3	0			sp|P34960|MMP12_MOUSE	P34960	MMP12_MOUSE	Mmp12	Macrophage metalloelastase
FQGTSLTHL	P	D	9	2	0.9996	3	0			sp|Q8BMT4|LRC33_MOUSE	Q8BMT4	LRC33_MOUSE	Nrros	Transforming growth factor beta activator LRRC33
FQIPPHAEL	R	R	9	2	1	7	0			sp|P30416|FKBP4_MOUSE	P30416	FKBP4_MOUSE	Fkbp4	Peptidyl-prolyl cis-trans isomerase FKBP4
FQIVNPHLL	E	K	9	2	0.9999	68	0	2Q(0.9840)		sp|P07742|RIR1_MOUSE	P07742	RIR1_MOUSE	Rrm1	Ribonucleoside-diphosphate reductase large subunit
FQKQNVTIM	S	D	9	2	0.9983	7	0	9M(15.9949)		sp|P29477|NOS2_MOUSE	P29477	NOS2_MOUSE	Nos2	Nitric oxide synthase, inducible
FQKTPLGVFL	I	A	10	2	0.9835	1	0			sp|E9Q555|RN213_MOUSE	E9Q555	RN213_MOUSE	Rnf213	E3 ubiquitin-protein ligase RNF213
FQLENVNKL	S	H	9	2	0.9988	2	0			sp|Q91XA2|GOLM1_MOUSE	Q91XA2	GOLM1_MOUSE	Golm1	Golgi membrane protein 1
FQLINVEDF	D	Q	9	2	0.9984	11	0			sp|Q8CFQ3|AQR_MOUSE	Q8CFQ3	AQR_MOUSE	Aqr	RNA helicase aquarius
FQLQQIEFL	S	K	9	2	0.9976	16	0			sp|Q99MU3|DSRAD_MOUSE	Q99MU3	DSRAD_MOUSE	Adar	Double-stranded RNA-specific adenosine deaminase
FQLRLAEVL	A	T	9	2	0.9946	15	0			sp|Q8R5K4|NOL6_MOUSE	Q8R5K4	NOL6_MOUSE	Nol6	Nucleolar protein 6
FQLRSFDQL	D	S	9	2	0.9997	3	0			sp|Q61221|HIF1A_MOUSE	Q61221	HIF1A_MOUSE	Hif1a	Hypoxia-inducible factor 1-alpha
FQLSLLAAM	Q	G	9	2	0.9754	1	0	9M(15.9949)		sp|Q9JIF7|COPB_MOUSE	Q9JIF7	COPB_MOUSE	Copb1	Coatomer subunit beta
FQLTHSLGGGTGSGMGTL	G	L	18	2	1	1	0	15M(15.9949)		sp|P68372|TBB4B_MOUSE	P68372	TBB4B_MOUSE	Tubb4b	Tubulin beta-4B chain	Tubb2a, Tubb2b, Tubb3, Tubb4a, Tubb5, Tubb6	sp|P99024|TBB5_MOUSE, sp|Q7TMM9|TBB2A_MOUSE, sp|Q922F4|TBB6_MOUSE, sp|Q9CWF2|TBB2B_MOUSE, sp|Q9D6F9|TBB4A_MOUSE, sp|Q9ERD7|TBB3_MOUSE
FQMAYSNL	K	L	8	2	0.9983	3	0	3M(15.9949)		sp|P16254|SRP14_MOUSE	P16254	SRP14_MOUSE	Srp14	Signal recognition particle 14 kDa protein
FQNFGNVVEL	F	R	10	2	0.9875	4	0			sp|P97855|G3BP1_MOUSE	P97855	G3BP1_MOUSE	G3bp1	Ras GTPase-activating protein-binding protein 1
FQNPSGSLA	P	S	9	2	0.8153	1	0			sp|P0CG14|DERPC_MOUSE	P0CG14	DERPC_MOUSE	Derpc	Decreased expression in renal and prostate cancer protein
FQNSLQEFI	E	N	9	2	0.9851	3	0			sp|Q9QXZ0|MACF1_MOUSE	Q9QXZ0	MACF1_MOUSE	Macf1	Microtubule-actin cross-linking factor 1, isoforms 1/2/3/4		sp|Q69ZZ9|K0754_MOUSE
FQNVNSVTL	K	F	9	2	0.9997	27	0			sp|Q8CDN6|TXNL1_MOUSE	Q8CDN6	TXNL1_MOUSE	Txnl1	Thioredoxin-like protein 1
FQQEFPSL	Q	Q	8	2	0.9997	18	0			sp|Q3TLH4|PRC2C_MOUSE	Q3TLH4	PRC2C_MOUSE	Prrc2c	Protein PRRC2C
FQQTNEDEL	N	S	9	2	0.9891	5	0			sp|Q9ES28|ARHG7_MOUSE	Q9ES28	ARHG7_MOUSE	Arhgef7	Rho guanine nucleotide exchange factor 7
FQREYFGS	K	-	8	2	0.9903	1	0			sp|Q8C6B9|AROS_MOUSE	Q8C6B9	AROS_MOUSE	Rps19bp1	Active regulator of SIRT1
FQSINTMHP	L	Q	9	2	0.9979	1	0	7M(15.9949)		sp|Q99LI8|HGS_MOUSE	Q99LI8	HGS_MOUSE	Hgs	Hepatocyte growth factor-regulated tyrosine kinase substrate
FQSISTEFL	R	A	9	2	0.9991	15	0			sp|Q9JHU4|DYHC1_MOUSE	Q9JHU4	DYHC1_MOUSE	Dync1h1	Cytoplasmic dynein 1 heavy chain 1
FQSNNIFPPP	P	T	10	2	0.9901	7	0			sp|P98078|DAB2_MOUSE	P98078	DAB2_MOUSE	Dab2	Disabled homolog 2
FQSNNIFPPPTM	P	S	12	2	0.9984	11	0	12M(15.9949)		sp|P98078|DAB2_MOUSE	P98078	DAB2_MOUSE	Dab2	Disabled homolog 2
FQSSAVMAL	R	Q	9	2	0.9962	2	0	7M(15.9949)		sp|P84228|H32_MOUSE	P84228	H32_MOUSE	H3c15	Histone H3.2	H3c11	sp|P68433|H31_MOUSE
FQTSHTLHL	L	S	9	2	0.9958	1	0			sp|Q8VDP4|CCAR2_MOUSE	Q8VDP4	CCAR2_MOUSE	Ccar2	Cell cycle and apoptosis regulator protein 2
FQVDNFEAL	V	N	9	2	0.9895	5	0			sp|P05555|ITAM_MOUSE	P05555	ITAM_MOUSE	Itgam	Integrin alpha-M
FQVILLEHI	S	I	9	2	0.9663	1	0			sp|Q9D2X5|SCC4_MOUSE	Q9D2X5	SCC4_MOUSE	Mau2	MAU2 chromatid cohesion factor homolog
FQVKNPPAAYI	R	Q	11	2	1	12	0			sp|Q9JL26|FMNL1_MOUSE	Q9JL26	FMNL1_MOUSE	Fmnl1	Formin-like protein 1
FQVKNPPHTYI	R	Q	11	3	0.9999	2	0			sp|Q6ZPF4|FMNL3_MOUSE	Q6ZPF4	FMNL3_MOUSE	Fmnl3	Formin-like protein 3	Fmnl2	sp|A2APV2|FMNL2_MOUSE
FQVQDKEVL	I	A	9	2	0.9995	3	0			sp|Q8BMG7|RBGPR_MOUSE	Q8BMG7	RBGPR_MOUSE	Rab3gap2	Rab3 GTPase-activating protein non-catalytic subunit
FQVRNLPTL	A	K	9	2	0.8441	1	0			sp|Q8BHN7|CL029_MOUSE	Q8BHN7	CL029_MOUSE		Uncharacterized protein C12orf29 homolog
FQVTHTVAL	R	G	9	2	0.9987	3	0			sp|Q9QYA2|TOM40_MOUSE	Q9QYA2	TOM40_MOUSE	Tomm40	Mitochondrial import receptor subunit TOM40 homolog
FQWRNLNTI	S	K	9	2	0.9769	1	0			sp|Q8BIR2|ASTE1_MOUSE	Q8BIR2	ASTE1_MOUSE	Aste1	Protein asteroid homolog 1
FQYEHILSF	V	G	9	2	0.9567	1	0			sp|F8VQB6|MYO10_MOUSE	F8VQB6	MYO10_MOUSE	Myo10	Unconventional myosin-X
FQYESKVFYL	D	K	10	2	1	14	0			sp|P68510|1433F_MOUSE	P68510	1433F_MOUSE	Ywhah	14-3-3 protein eta
FQYIFEGL	K	G	8	2	0.9836	2	0			sp|O35382|EXOC4_MOUSE	O35382	EXOC4_MOUSE	Exoc4	Exocyst complex component 4
FQYRNRIAM	Q	E	9	3	0.9988	2	0	9M(15.9949)		sp|P22437|PGH1_MOUSE	P22437	PGH1_MOUSE	Ptgs1	Prostaglandin G/H synthase 1
FQYSNSMESV	C	K	10	2	0.9945	1	0	7M(15.9949)		sp|Q91Z67|SRGP2_MOUSE	Q91Z67	SRGP2_MOUSE	Srgap2	SLIT-ROBO Rho GTPase-activating protein 2
FRLINANMM	A	V	9	2	0.9996	3	0	8M(15.9949), 9M(15.9949)		sp|O35593|PSDE_MOUSE	O35593	PSDE_MOUSE	Psmd14	26S proteasome non-ATPase regulatory subunit 14
FRLQNSTLM	D	A	9	2	0.9819	2	0	9M(15.9949)		sp|Q8VD04|GRAP1_MOUSE	Q8VD04	GRAP1_MOUSE	Gripap1	GRIP1-associated protein 1
FRMTDQEAI	C	Q	9	2	0.9661	2	0	3M(15.9949)		sp|Q61937|NPM_MOUSE	Q61937	NPM_MOUSE	Npm1	Nucleophosmin
FSADKVDTM	K	I	9	2	0.9914	1	0	9M(15.9949)		sp|Q6DFW4|NOP58_MOUSE	Q6DFW4	NOP58_MOUSE	Nop58	Nucleolar protein 58
FSAGSLLVYM	P	N	10	2	0.9997	8	0	10M(15.9949)		sp|A2A3V2|S2543_MOUSE	A2A3V2	S2543_MOUSE	Slc25a43	Solute carrier family 25 member 43
FSAPTLEDHF	D	N	10	2	0.9813	1	0			sp|C0HKD8|MFA1A_MOUSE	C0HKD8	MFA1A_MOUSE	Mfap1a	Microfibrillar-associated protein 1A	Mfap1b	sp|C0HKD9|MFA1B_MOUSE
FSAPTPIQAL	G	T	10	2	0.9977	2	0			sp|Q9ESV0|DDX24_MOUSE	Q9ESV0	DDX24_MOUSE	Ddx24	ATP-dependent RNA helicase DDX24
FSATFPKEIQM	M	L	11	2	0.9071	1	0	11M(15.9949)		sp|P16381|DDX3L_MOUSE	P16381	DDX3L_MOUSE	D1Pas1	Putative ATP-dependent RNA helicase Pl10	Ddx3x, Ddx3y	sp|Q62095|DDX3Y_MOUSE, sp|Q62167|DDX3X_MOUSE
FSDGYLAL	G	W	8	2	0.8249	1	0			sp|Q8CJF7|ELYS_MOUSE	Q8CJF7	ELYS_MOUSE	Ahctf1	Protein ELYS
FSDTKMSEL	E	V	9	2	0.7384	1	0			sp|Q3UWM4|KDM7A_MOUSE	Q3UWM4	KDM7A_MOUSE	Kdm7a	Lysine-specific demethylase 7A
FSEENHEPL	C	R	9	2	0.9996	29	0			sp|Q9EQH3|VPS35_MOUSE	Q9EQH3	VPS35_MOUSE	Vps35	Vacuolar protein sorting-associated protein 35
FSEIVLSI	P	P	8	2	0.9273	1	0			sp|Q05BQ1|TUTLA_MOUSE	Q05BQ1	TUTLA_MOUSE	Igsf9	Protein turtle homolog A
FSELNSTEM	I	H	9	2	0.9997	4	0	9M(15.9949)		sp|Q8BRN9|C2D1B_MOUSE	Q8BRN9	C2D1B_MOUSE	Cc2d1b	Coiled-coil and C2 domain-containing protein 1B
FSEVPEAF	P	L	8	2	0.8678	1	0			sp|Q924D0|RT4I1_MOUSE	Q924D0	RT4I1_MOUSE	Rtn4ip1	Reticulon-4-interacting protein 1, mitochondrial
FSFAPVTKL	N	-	9	2	0.9993	2	0			sp|Q8BJ34|MARF1_MOUSE	Q8BJ34	MARF1_MOUSE	Marf1	Meiosis regulator and mRNA stability factor 1
FSFGNTSTL	G	G	9	2	0.9999	27	0			sp|Q6PFD9|NUP98_MOUSE	Q6PFD9	NUP98_MOUSE	Nup98	Nuclear pore complex protein Nup98-Nup96
FSFGNTSTLGQP	G	S	12	2	0.9852	5	0			sp|Q6PFD9|NUP98_MOUSE	Q6PFD9	NUP98_MOUSE	Nup98	Nuclear pore complex protein Nup98-Nup96
FSFGNTSTLGQPSTNTM	G	G	17	2	1	6	0	17M(15.9949)		sp|Q6PFD9|NUP98_MOUSE	Q6PFD9	NUP98_MOUSE	Nup98	Nuclear pore complex protein Nup98-Nup96
FSFGSKNTL	T	T	9	2	0.9957	2	0			sp|Q9ERU9|RBP2_MOUSE	Q9ERU9	RBP2_MOUSE	Ranbp2	E3 SUMO-protein ligase RanBP2
FSFKMISYM	V	D	9	2	0.9999	2	0	5M(15.9949), 9M(15.9949)		sp|Q5H8C4|VP13A_MOUSE	Q5H8C4	VP13A_MOUSE	Vps13a	Intermembrane lipid transfer protein VPS13A
FSFRNTQEVI	I	A	10	2	0.9984	6	0			sp|Q80SU7|GVIN1_MOUSE	Q80SU7	GVIN1_MOUSE	Gvin1	Interferon-induced very large GTPase 1
FSFSQPGFSSV	G	P	11	2	0.9998	2	0			sp|Q80U93|NU214_MOUSE	Q80U93	NU214_MOUSE	Nup214	Nuclear pore complex protein Nup214
FSGANKEKL	E	E	9	2	0.9964	3	0			sp|P10639|THIO_MOUSE	P10639	THIO_MOUSE	Txn	Thioredoxin
FSGHNLEYL	G	L	9	2	0.9998	15	0			sp|Q8R3J5|CHAC1_MOUSE	Q8R3J5	CHAC1_MOUSE	Chac1	Glutathione-specific gamma-glutamylcyclotransferase 1
FSGPAISRI	I	N	9	2	0.9553	1	0			sp|Q9CS42|PRPS2_MOUSE	Q9CS42	PRPS2_MOUSE	Prps2	Ribose-phosphate pyrophosphokinase 2	Prps1	sp|Q9D7G0|PRPS1_MOUSE
FSGSNAEQM	Q	R	9	2	0.9811	6	0	9M(15.9949)		sp|Q60875|ARHG2_MOUSE	Q60875	ARHG2_MOUSE	Arhgef2	Rho guanine nucleotide exchange factor 2
FSGSNTLHL	L	V	9	2	0.9993	2	0			sp|E9Q414|APOB_MOUSE	E9Q414	APOB_MOUSE	Apob	Apolipoprotein B-100
FSGSSRSDCLAL	H	V	12	2	0.7568	2	0			sp|Q14BI7|TDRD9_MOUSE	Q14BI7	TDRD9_MOUSE	Tdrd9	ATP-dependent RNA helicase TDRD9
FSHGNAVDL	L	G	9	2	0.9861	1	0			sp|Q7M759|AB17B_MOUSE	Q7M759	AB17B_MOUSE	Abhd17b	Alpha/beta hydrolase domain-containing protein 17B	Abhd17a, Abhd17c	sp|Q8VCV1|AB17C_MOUSE, sp|Q99JW1|AB17A_MOUSE
FSHPNVLPVL	I	G	10	2	0.9942	3	0			sp|O55222|ILK_MOUSE	O55222	ILK_MOUSE	Ilk	Integrin-linked protein kinase
FSHYMEENL	Y	M	9	2	0.9613	3	0	5M(15.9949)		sp|P53351|PLK2_MOUSE	P53351	PLK2_MOUSE	Plk2	Serine/threonine-protein kinase PLK2
FSIDSPDSL	C	E	9	2	0.992	1	0			sp|Q62159|RHOC_MOUSE	Q62159	RHOC_MOUSE	Rhoc	Rho-related GTP-binding protein RhoC	Rhoa	sp|Q9QUI0|RHOA_MOUSE
FSIFNRSIDAF	F	K	11	2	0.9931	1	0			sp|P20826|SCF_MOUSE	P20826	SCF_MOUSE	Kitlg	Kit ligand
FSILFNRV	A	L	8	2	0.9979	2	0			sp|P47713|PA24A_MOUSE	P47713	PA24A_MOUSE	Pla2g4a	Cytosolic phospholipase A2
FSIMGVNL	I	F	8	2	0.9299	2	0			sp|A2ASI5|SCN3A_MOUSE	A2ASI5	SCN3A_MOUSE	Scn3a	Sodium channel protein type 3 subunit alpha	Scn10a, Scn1a, Scn2a, Scn4a, Scn5a, Scn8a, Scn9a	sp|A2APX8|SCN1A_MOUSE, sp|B1AWN6|SCN2A_MOUSE, sp|Q62205|SCN9A_MOUSE, sp|Q6QIY3|SCNAA_MOUSE, sp|Q9ER60|SCN4A_MOUSE, sp|Q9JJV9|SCN5A_MOUSE, sp|Q9WTU3|SCN8A_MOUSE
FSITDQQTL	D	-	9	2	0.9999	26	0			sp|C3VPR6|NLRC5_MOUSE	C3VPR6	NLRC5_MOUSE	Nlrc5	Protein NLRC5
FSKEEIDQM	R	F	9	2	0.9958	3	0	9M(15.9949)		sp|P51667|MLRV_MOUSE	P51667	MLRV_MOUSE	Myl2	Myosin regulatory light chain 2, ventricular/cardiac muscle isoform
FSKKNFESL	I	S	9	2	0.9349	1	0			sp|Q9DBG6|RPN2_MOUSE	Q9DBG6	RPN2_MOUSE	Rpn2	Dolichyl-diphosphooligosaccharide--protein glycosyltransferase subunit 2
FSKVNIQVL	I	E	9	2	0.9981	8	0			sp|Q9Z2F2|OASL2_MOUSE	Q9Z2F2	OASL2_MOUSE	Oasl2	2'-5'-oligoadenylate synthase-like protein 2
FSLAHITQL	L	V	9	2	0.9988	6	0			sp|Q01730|RSU1_MOUSE	Q01730	RSU1_MOUSE	Rsu1	Ras suppressor protein 1
FSLAPYRDYL	V	D	10	2	0.9887	3	0			sp|Q3TEI4|CO039_MOUSE	Q3TEI4	CO039_MOUSE		Uncharacterized protein C15orf39 homolog
FSLENLRTM	E	N	9	2	0.9584	1	0	9M(15.9949)		sp|Q80TG1|KANL1_MOUSE	Q80TG1	KANL1_MOUSE	Kansl1	KAT8 regulatory NSL complex subunit 1
FSLENNFLL	R	Q	9	2	0.9971	11	0			sp|P42225|STAT1_MOUSE	P42225	STAT1_MOUSE	Stat1	Signal transducer and activator of transcription 1
FSLENVPEGEL	Q	L	11	2	0.9891	1	0			sp|Q6A037|N4BP1_MOUSE	Q6A037	N4BP1_MOUSE	N4bp1	NEDD4-binding protein 1
FSLEYPTI	G	S	8	2	0.9304	2	0			sp|Q61189|ICLN_MOUSE	Q61189	ICLN_MOUSE	Clns1a	Methylosome subunit pICln
FSLGNLEQF	D	N	9	2	0.9997	12	0			sp|Q3U182|CRTC2_MOUSE	Q3U182	CRTC2_MOUSE	Crtc2	CREB-regulated transcription coactivator 2
FSLHNPYNL	A	Y	9	2	0.964	1	0			sp|O70306|TBX15_MOUSE	O70306	TBX15_MOUSE	Tbx15	T-box transcription factor TBX15
FSLINGDDM	L	F	9	2	0.9329	1	0	9M(15.9949)		sp|Q99J21|MCLN1_MOUSE	Q99J21	MCLN1_MOUSE	Mcoln1	Mucolipin-1	Mcoln3	sp|Q8R4F0|MCLN3_MOUSE
FSLPNGTAL	D	L	9	2	0.9783	2	0			sp|P41234|ABCA2_MOUSE	P41234	ABCA2_MOUSE	Abca2	ATP-binding cassette sub-family A member 2
FSLPTCRISE	S	A	10	2	0.9898	1	0			sp|O54692|ZW10_MOUSE	O54692	ZW10_MOUSE	Zw10	Centromere/kinetochore protein zw10 homolog
FSLQNQLRL	D	A	9	2	0.9995	5	0			sp|Q9JJ28|FLII_MOUSE	Q9JJ28	FLII_MOUSE	Flii	Protein flightless-1 homolog
FSLRFNNL	V	K	8	2	0.9864	3	0			sp|Q6R5N8|TLR13_MOUSE	Q6R5N8	TLR13_MOUSE	Tlr13	Toll-like receptor 13
FSLSNPSLSTTNL	L	S	13	2	0.9983	2	0			sp|Q91X84|CRTC3_MOUSE	Q91X84	CRTC3_MOUSE	Crtc3	CREB-regulated transcription coactivator 3
FSLTNGMYP	Q	H	9	2	0.9999	49	0	7M(15.9949)		sp|P47911|RL6_MOUSE	P47911	RL6_MOUSE	Rpl6	60S ribosomal protein L6
FSLVGFTQM	L	T	9	2	0.9999	13	0	9M(15.9949)		sp|Q9CY27|TECR_MOUSE	Q9CY27	TECR_MOUSE	Tecr	Very-long-chain enoyl-CoA reductase
FSLVNGDDM	L	F	9	2	0.9995	1	0	9M(15.9949)		sp|Q8K595|MCLN2_MOUSE	Q8K595	MCLN2_MOUSE	Mcoln2	Mucolipin-2
FSLVNGDDMF	L	A	10	2	0.9921	1	0	9M(15.9949)		sp|Q8K595|MCLN2_MOUSE	Q8K595	MCLN2_MOUSE	Mcoln2	Mucolipin-2
FSLVSVEQL	K	A	9	2	0.9993	2	0			sp|Q8BX70|VP13C_MOUSE	Q8BX70	VP13C_MOUSE	Vps13c	Intermembrane lipid transfer protein VPS13C
FSLYNGILL	W	E	9	2	0.9822	1	0			sp|P70245|EBP_MOUSE	P70245	EBP_MOUSE	Ebp	3-beta-hydroxysteroid-Delta(8),Delta(7)-isomerase
FSMVGLYYI	I	N	9	2	0.9997	11	0	3M(15.9949)		sp|Q5RL79|KTAP2_MOUSE	Q5RL79	KTAP2_MOUSE	Krtcap2	Keratinocyte-associated protein 2
FSNASPHRMPL	Y	E	11	3	0.7721	1	0	9M(15.9949)		sp|Q64692|SIA8D_MOUSE	Q64692	SIA8D_MOUSE	St8sia4	CMP-N-acetylneuraminate-poly-alpha-2,8-sialyltransferase
FSNKITPIQSKEAY	L	-	14	3	1	1	0			sp|Q9WUR9|KAD4_MOUSE	Q9WUR9	KAD4_MOUSE	Ak4	Adenylate kinase 4, mitochondrial
FSNKNLEEL	L	C	9	2	0.9998	5	0			sp|Q8C0S1|DI3L1_MOUSE	Q8C0S1	DI3L1_MOUSE	Dis3l	DIS3-like exonuclease 1
FSNLDCVNDNY	G	W	11	2	0.9097	1	0	10N(0.9840), 3N(0.9840), 8N(0.9840)		sp|Q9Z265|CHK2_MOUSE	Q9Z265	CHK2_MOUSE	Chek2	Serine/threonine-protein kinase Chk2
FSNLFGGEPL	A	S	10	2	0.9913	7	0			sp|Q62351|TFR1_MOUSE	Q62351	TFR1_MOUSE	Tfrc	Transferrin receptor protein 1
FSNLFGGEPLSY	A	T	12	2	0.9996	2	0			sp|Q62351|TFR1_MOUSE	Q62351	TFR1_MOUSE	Tfrc	Transferrin receptor protein 1
FSNVNLKEV	V	N	9	2	1	14	0			sp|Q3U1J4|DDB1_MOUSE	Q3U1J4	DDB1_MOUSE	Ddb1	DNA damage-binding protein 1
FSNVNSIEF	L	T	9	2	0.9831	4	0			sp|Q61735|CD47_MOUSE	Q61735	CD47_MOUSE	Cd47	Leukocyte surface antigen CD47
FSPENTELL	E	T	9	2	0.9711	5	0			sp|Q8C1Z7|BBS4_MOUSE	Q8C1Z7	BBS4_MOUSE	Bbs4	Bardet-Biedl syndrome 4 protein homolog
FSPENTELLTTL	E	G	12	2	0.9407	1	0			sp|Q8C1Z7|BBS4_MOUSE	Q8C1Z7	BBS4_MOUSE	Bbs4	Bardet-Biedl syndrome 4 protein homolog
FSPFNPTSL	P	I	9	2	0.9956	2	0			sp|Q9Z2U4|ELF4_MOUSE	Q9Z2U4	ELF4_MOUSE	Elf4	ETS-related transcription factor Elf-4
FSPLNPMRV	F	H	9	2	0.9955	4	0	7M(15.9949)		sp|P70333|HNRH2_MOUSE	P70333	HNRH2_MOUSE	Hnrnph2	Heterogeneous nuclear ribonucleoprotein H2
FSPLNPMRVHI	F	E	11	3	0.9932	2	0	7M(15.9949)		sp|P70333|HNRH2_MOUSE	P70333	HNRH2_MOUSE	Hnrnph2	Heterogeneous nuclear ribonucleoprotein H2
FSPLNPVRV	F	H	9	2	0.9995	18	0			sp|Q9Z2X1|HNRPF_MOUSE	Q9Z2X1	HNRPF_MOUSE	Hnrnpf	Heterogeneous nuclear ribonucleoprotein F	Hnrnph1	sp|O35737|HNRH1_MOUSE
FSPLNPVRVHI	F	E	11	3	0.9805	2	0			sp|Q9Z2X1|HNRPF_MOUSE	Q9Z2X1	HNRPF_MOUSE	Hnrnpf	Heterogeneous nuclear ribonucleoprotein F	Hnrnph1	sp|O35737|HNRH1_MOUSE
FSPMGVDHM	R	S	9	2	0.9962	8	0	4M(15.9949), 9M(15.9949)		sp|P70372|ELAV1_MOUSE	P70372	ELAV1_MOUSE	Elavl1	ELAV-like protein 1
FSPNRVIGL	C	S	9	2	0.9966	2	0			sp|Q9DCH4|EIF3F_MOUSE	Q9DCH4	EIF3F_MOUSE	Eif3f	Eukaryotic translation initiation factor 3 subunit F
FSPPTLPGNFL	S	I	11	2	0.9991	15	0			sp|Q8C570|RAE1L_MOUSE	Q8C570	RAE1L_MOUSE	Rae1	mRNA export factor
FSPRAVDYV	D	K	9	2	0.9767	1	0			sp|Q8BVH9|METL6_MOUSE	Q8BVH9	METL6_MOUSE	Mettl6	tRNA N(3)-methylcytidine methyltransferase METTL6
FSPRFVAL	D	F	8	2	0.9651	3	0			sp|Q9DBY1|SYVN1_MOUSE	Q9DBY1	SYVN1_MOUSE	Syvn1	E3 ubiquitin-protein ligase synoviolin
FSPSAQPHGHTF	G	N	12	3	0.7429	1	0			sp|Q9CQT2|RBM7_MOUSE	Q9CQT2	RBM7_MOUSE	Rbm7	RNA-binding protein 7
FSPSFINHI	V	N	9	2	0.994	2	0			sp|Q9JIX9|FASTK_MOUSE	Q9JIX9	FASTK_MOUSE	Fastk	Fas-activated serine/threonine kinase
FSPSFTEL	D	Q	8	2	0.9494	1	0			sp|Q9Z2F2|OASL2_MOUSE	Q9Z2F2	OASL2_MOUSE	Oasl2	2'-5'-oligoadenylate synthase-like protein 2
FSPSHETHL	C	F	9	2	0.8434	1	0			sp|Q8BUI3|LRWD1_MOUSE	Q8BUI3	LRWD1_MOUSE	LRWD1	Leucine-rich repeat and WD repeat-containing protein 1
FSPSHPLLPL	T	R	10	2	0.8961	1	0			sp|A2AHC3|CAMP1_MOUSE	A2AHC3	CAMP1_MOUSE	Camsap1	Calmodulin-regulated spectrin-associated protein 1
FSPTNPAHL	S	L	9	2	0.9956	4	0			sp|A6PWY4|WDR76_MOUSE	A6PWY4	WDR76_MOUSE	Wdr76	WD repeat-containing protein 76
FSPTNPAHLL	S	S	10	2	0.9996	16	0			sp|A6PWY4|WDR76_MOUSE	A6PWY4	WDR76_MOUSE	Wdr76	WD repeat-containing protein 76
FSPTNYHFL	L	S	9	2	0.9987	3	0			sp|Q8K2I4|MANBA_MOUSE	Q8K2I4	MANBA_MOUSE	Manba	Beta-mannosidase
FSPYNGGSL	Y	G	9	2	0.8754	2	0			sp|Q7TQI7|ABTB2_MOUSE	Q7TQI7	ABTB2_MOUSE	Abtb2	Ankyrin repeat and BTB/POZ domain-containing protein 2
FSQENTEKI	H	N	9	2	0.9985	5	0			sp|Q8CIG0|DEP1A_MOUSE	Q8CIG0	DEP1A_MOUSE	Depdc1a	DEP domain-containing protein 1A
FSQEYINL	I	L	8	2	0.9959	14	0			sp|Q9D8V0|HM13_MOUSE	Q9D8V0	HM13_MOUSE	Hm13	Minor histocompatibility antigen H13
FSQGPGNRPPL	Y	R	11	2	0.8153	1	0			sp|Q60787|LCP2_MOUSE	Q60787	LCP2_MOUSE	Lcp2	Lymphocyte cytosolic protein 2
FSQPGFSSV	S	P	9	2	0.9894	1	0			sp|Q80U93|NU214_MOUSE	Q80U93	NU214_MOUSE	Nup214	Nuclear pore complex protein Nup214
FSSANGITV	G	S	9	2	0.9995	2	0			sp|Q62087|PON3_MOUSE	Q62087	PON3_MOUSE	Pon3	Serum paraoxonase/lactonase 3
FSSGASSHLL	A	S	10	2	0.9801	5	0			sp|Q8BMJ8|SP8_MOUSE	Q8BMJ8	SP8_MOUSE	Sp8	Transcription factor Sp8
FSSLNLRETNL	T	E	11	2	0.9891	2	0			sp|P20152|VIME_MOUSE	P20152	VIME_MOUSE	Vim	Vimentin
FSSQNNAFA	L	Q	9	2	0.9988	5	0			sp|Q6PFD9|NUP98_MOUSE	Q6PFD9	NUP98_MOUSE	Nup98	Nuclear pore complex protein Nup98-Nup96
FSSSNPSVV	G	S	9	2	0.9237	1	0			sp|P98078|DAB2_MOUSE	P98078	DAB2_MOUSE	Dab2	Disabled homolog 2
FSSTNPTQV	N	N	9	2	0.9967	3	0			sp|E9PVX6|KI67_MOUSE	E9PVX6	KI67_MOUSE	Mki67	Proliferation marker protein Ki-67
FSSVQVFNI	S	L	9	2	0.8346	1	0			sp|Q6A009|LTN1_MOUSE	Q6A009	LTN1_MOUSE	Ltn1	E3 ubiquitin-protein ligase listerin
FSTENDNHL	C	Y	9	2	0.9342	1	0			sp|O08983|HPS1_MOUSE	O08983	HPS1_MOUSE	Hps1	BLOC-3 complex member HPS1
FSVASEEVM	T	K	9	2	0.9634	1	0	9M(15.9949)		sp|Q9JIH2|NUP50_MOUSE	Q9JIH2	NUP50_MOUSE	Nup50	Nuclear pore complex protein Nup50
FSVEGQENL	G	Q	9	2	0.9996	13	0			sp|Q9DBC3|CMTR1_MOUSE	Q9DBC3	CMTR1_MOUSE	Cmtr1	Cap-specific mRNA (nucleoside-2'-O-)-methyltransferase 1
FSVEGQLEF	H	R	9	2	0.9996	15	0			sp|P11499|HS90B_MOUSE	P11499	HS90B_MOUSE	Hsp90ab1	Heat shock protein HSP 90-beta	Hsp90aa1	sp|P07901|HS90A_MOUSE
FSVEKLGSL	Y	R	9	2	0.9771	3	0			sp|Q922Q1|MARC2_MOUSE	Q922Q1	MARC2_MOUSE	Mtarc2	Mitochondrial amidoxime reducing component 2
FSVENFDAL	V	K	9	2	0.9989	15	0			sp|Q9QXH4|ITAX_MOUSE	Q9QXH4	ITAX_MOUSE	Itgax	Integrin alpha-X
FSVFLNI	F	N	7	2	0.9454	2	0			sp|Q3UYK3|TBCD9_MOUSE	Q3UYK3	TBCD9_MOUSE	Tbc1d9	TBC1 domain family member 9
FSVHFPLL	S	K	8	2	0.9475	1	0			sp|Q7TNJ0|DCSTP_MOUSE	Q7TNJ0	DCSTP_MOUSE	Dcstamp	Dendritic cell-specific transmembrane protein
FSVLNWDQV	S	S	9	2	0.9991	3	0			sp|Q5SSF7|TET5C_MOUSE	Q5SSF7	TET5C_MOUSE	Tent5c	Terminal nucleotidyltransferase 5C
FSVQNEAGL	T	E	9	2	0.8231	1	0			sp|Q9Z2U2|ZN292_MOUSE	Q9Z2U2	ZN292_MOUSE	Zfp292	Zinc finger protein 292
FSVTNPHTM	S	N	9	2	0.9999	10	0	9M(15.9949)		sp|Q8CDD9|LRIF1_MOUSE	Q8CDD9	LRIF1_MOUSE	Lrif1	Ligand-dependent nuclear receptor-interacting factor 1
FSVVNPASF	C	Q	9	2	0.9963	2	0			sp|Q8R527|RHOQ_MOUSE	Q8R527	RHOQ_MOUSE	Rhoq	Rho-related GTP-binding protein RhoQ
FSYAPPVDSFL	G	-	11	2	0.9954	1	0			sp|Q9WVC6|SGK1_MOUSE	Q9WVC6	SGK1_MOUSE	Sgk1	Serine/threonine-protein kinase Sgk1
FSYEVVML	V	V	8	2	0.9955	1	0	7M(15.9949)		sp|Q61093|CY24B_MOUSE	Q61093	CY24B_MOUSE	Cybb	Cytochrome b-245 heavy chain
FSYGFDGRGL	E	K	10	2	0.9904	3	0			sp|Q00PI9|HNRL2_MOUSE	Q00PI9	HNRL2_MOUSE	Hnrnpul2	Heterogeneous nuclear ribonucleoprotein U-like protein 2
FSYGQNKTAF	A	G	10	2	0.9999	4	0			sp|Q6PFD9|NUP98_MOUSE	Q6PFD9	NUP98_MOUSE	Nup98	Nuclear pore complex protein Nup98-Nup96
FSYGRALQA	T	S	9	2	0.8268	1	0			sp|P05064|ALDOA_MOUSE	P05064	ALDOA_MOUSE	Aldoa	Fructose-bisphosphate aldolase A	Aldob, Aldoc	sp|P05063|ALDOC_MOUSE, sp|Q91Y97|ALDOB_MOUSE
FSYGRALQASAL	T	K	12	2	0.8	1	0			sp|P05064|ALDOA_MOUSE	P05064	ALDOA_MOUSE	Aldoa	Fructose-bisphosphate aldolase A	Aldob, Aldoc	sp|P05063|ALDOC_MOUSE, sp|Q91Y97|ALDOB_MOUSE
FSYKIDFAEM	K	K	10	2	0.9999	4	0	10M(15.9949)		sp|Q8CFF0|PAR11_MOUSE	Q8CFF0	PAR11_MOUSE	Parp11	Protein mono-ADP-ribosyltransferase PARP11
FSYLMKD	F	K	7	2	0.9821	3	0			sp|P68446|E7_VACCW	P68446	E7_VACCW	VACWR063	Protein E7
FSYLMKDKL	F	N	9	2	1	43	0	5M(15.9949)		sp|P68446|E7_VACCW	P68446	E7_VACCW	VACWR063	Protein E7
FSYLNPQEL	I	C	9	2	0.9998	23	0			sp|Q8C2S5|FBXL5_MOUSE	Q8C2S5	FBXL5_MOUSE	Fbxl5	F-box/LRR-repeat protein 5
FSYQFSDL	S	D	8	2	0.9959	2	0			sp|O08579|EMD_MOUSE	O08579	EMD_MOUSE	Emd	Emerin
FSYQFSDLDSA	S	A	11	2	0.9987	4	0			sp|O08579|EMD_MOUSE	O08579	EMD_MOUSE	Emd	Emerin
FSYSLGEAA	G	W	9	2	0.9891	1	0			sp|Q91YT7|YTHD2_MOUSE	Q91YT7	YTHD2_MOUSE	Ythdf2	YTH domain-containing family protein 2
FTALHYAA	G	M	8	2	0.9352	2	0			sp|Q91ZU0|ASB7_MOUSE	Q91ZU0	ASB7_MOUSE	Asb7	Ankyrin repeat and SOCS box protein 7
FTCGGILT	V	G	8	2	0.9331	1	0			sp|Q8R4W6|PCOC2_MOUSE	Q8R4W6	PCOC2_MOUSE	Pcolce2	Procollagen C-endopeptidase enhancer 2
FTDVNKTEM	A	A	9	2	0.9967	2	0	9M(15.9949)		sp|E9Q309|CE350_MOUSE	E9Q309	CE350_MOUSE	Cep350	Centrosome-associated protein 350
FTFEYRYL	G	E	8	2	0.9334	1	0			sp|Q8K0V4|CNOT3_MOUSE	Q8K0V4	CNOT3_MOUSE	Cnot3	CCR4-NOT transcription complex subunit 3
FTFNDEIKTM	R	K	10	2	0.9382	1	0	10M(15.9949)		sp|Q9D2Y4|MLKL_MOUSE	Q9D2Y4	MLKL_MOUSE	Mlkl	Mixed lineage kinase domain-like protein
FTFPSLTKE	M	D	9	2	0.7555	1	0			sp|Q3V0C5|UBP48_MOUSE	Q3V0C5	UBP48_MOUSE	Usp48	Ubiquitin carboxyl-terminal hydrolase 48
FTFQFNNL	L	G	8	2	0.9898	14	0			sp|Q8R5H1|UBP15_MOUSE	Q8R5H1	UBP15_MOUSE	Usp15	Ubiquitin carboxyl-terminal hydrolase 15
FTFVLRDLL	N	P	9	2	0.9887	1	0			sp|O35664|INAR2_MOUSE	O35664	INAR2_MOUSE	Ifnar2	Interferon alpha/beta receptor 2
FTIENVTRT	K	R	9	2	0.9991	6	0			sp|Q9CPS7|PNO1_MOUSE	Q9CPS7	PNO1_MOUSE	Pno1	RNA-binding protein PNO1
FTIFNRVDI	E	S	9	2	0.9971	2	0			sp|O35638|STAG2_MOUSE	O35638	STAG2_MOUSE	Stag2	Cohesin subunit SA-2
FTILNPIYSI	L	T	10	2	0.9951	1	0			sp|Q8R081|HNRPL_MOUSE	Q8R081	HNRPL_MOUSE	Hnrnpl	Heterogeneous nuclear ribonucleoprotein L
FTKMAEI	S	R	7	2	0.9819	6	0			sp|P07242|H5_VACCW	P07242	H5_VACCW	VACWR103	Late transcription elongation factor H5
FTKTEEL	F	N	7	2	0.9568	2	0			sp|Q6IFX2|K1C42_MOUSE	Q6IFX2	K1C42_MOUSE	Krt42	Keratin, type I cytoskeletal 42
FTLGNVVGM	G	Y	9	2	0.9211	2	0	9M(15.9949)		sp|P0DP99|STMP1_MOUSE	P0DP99	STMP1_MOUSE	Stmp1	Short transmembrane mitochondrial protein 1
FTLINEEML	L	T	9	2	1	48	0	8M(15.9949)		sp|P06856|DPOL_VACCW	P06856	DPOL_VACCW	POL	DNA polymerase
FTLVNKKNALI	W	R	11	3	0.9691	2	0			sp|Q99MS7|EH1L1_MOUSE	Q99MS7	EH1L1_MOUSE	Ehbp1l1	EH domain-binding protein 1-like protein 1
FTNSPFLRDFM	L	E	11	2	0.9985	3	0	11M(15.9949)		sp|Q80TI0|ASTRB_MOUSE	Q80TI0	ASTRB_MOUSE	Gramd1b	Protein Aster-B
FTPNNIKQV	F	S	9	2	0.9935	1	0			sp|Q61656|DDX5_MOUSE	Q61656	DDX5_MOUSE	Ddx5	Probable ATP-dependent RNA helicase DDX5
FTSLNAERM	L	K	9	2	0.9982	1	0	9M(15.9949)		sp|P28658|ATX10_MOUSE	P28658	ATX10_MOUSE	Atxn10	Ataxin-10
FTSSMRGMDTV	G	-	11	2	0.9999	7	0	5M(15.9949), 8M(15.9949)		sp|A2RTL5|RSRC2_MOUSE	A2RTL5	RSRC2_MOUSE	Rsrc2	Arginine/serine-rich coiled-coil protein 2
FTTQGQSEL	A	T	9	2	0.7531	1	0			sp|Q9CQC6|5MP2_MOUSE	Q9CQC6	5MP2_MOUSE	Bzw1	eIF5-mimic protein 2
FTVSNFVDNL	D	Y	10	2	0.9999	11	0			sp|Q69ZK9|NLGN2_MOUSE	Q69ZK9	NLGN2_MOUSE	Nlgn2	Neuroligin-2
FTWEHSNL	Q	E	8	2	0.8886	1	0			sp|B0V2N1|PTPRS_MOUSE	B0V2N1	PTPRS_MOUSE	Ptprs	Receptor-type tyrosine-protein phosphatase S	Ptprd	sp|Q64487|PTPRD_MOUSE
FTWTGAEHI	S	N	9	2	0.9944	2	0			sp|Q80TP3|UBR5_MOUSE	Q80TP3	UBR5_MOUSE	Ubr5	E3 ubiquitin-protein ligase UBR5
FTYGFFKI	P	-	8	2	0.9962	3	0			sp|P15307|REL_MOUSE	P15307	REL_MOUSE	Rel	Proto-oncogene c-Rel
FTYRYLAL	S	F	8	2	0.9979	2	0			sp|Q920Q4|VPS16_MOUSE	Q920Q4	VPS16_MOUSE	Vps16	Vacuolar protein sorting-associated protein 16 homolog
FTYVPSRL	S	G	8	2	0.8481	1	0			sp|O88532|ZFR_MOUSE	O88532	ZFR_MOUSE	Zfr	Zinc finger RNA-binding protein
FVAPREPGAVSY	L	-	12	2	1	6	0			sp|P57716|NICA_MOUSE	P57716	NICA_MOUSE	Ncstn	Nicastrin
FVARNGPEF	S	E	9	2	0.8948	1	0			sp|Q8K4Z5|SF3A1_MOUSE	Q8K4Z5	SF3A1_MOUSE	Sf3a1	Splicing factor 3A subunit 1	Cherp	sp|Q8CGZ0|CHERP_MOUSE
FVARNSSEL	D	S	9	2	0.9999	4	0			sp|Q08509|EPS8_MOUSE	Q08509	EPS8_MOUSE	Eps8	Epidermal growth factor receptor kinase substrate 8
FVAYPHL	P	R	7	2	0.9799	1	0			sp|P43024|CX6A1_MOUSE	P43024	CX6A1_MOUSE	Cox6a1	Cytochrome c oxidase subunit 6A1, mitochondrial
FVFAYKSL	C	H	8	2	0.9903	1	0			sp|Q9JJW0|PXMP4_MOUSE	Q9JJW0	PXMP4_MOUSE	Pxmp4	Peroxisomal membrane protein 4
FVFLHIDNSGM	I	R	11	2	0.9998	1	0	11M(15.9949)		sp|Q6PFD9|NUP98_MOUSE	Q6PFD9	NUP98_MOUSE	Nup98	Nuclear pore complex protein Nup98-Nup96
FVGENDRTTL	P	M	10	2	0.9912	2	0			sp|Q62407|SPEG_MOUSE	Q62407	SPEG_MOUSE	Speg	Striated muscle-specific serine/threonine-protein kinase
FVGINASDI	R	N	9	2	0.9961	1	0			sp|Q8BGC4|PTGR3_MOUSE	Q8BGC4	PTGR3_MOUSE	Ptgr3	Prostaglandin reductase-3
FVGSPPKGL	P	S	9	2	0.9932	3	0			sp|P98078|DAB2_MOUSE	P98078	DAB2_MOUSE	Dab2	Disabled homolog 2
FVGSPPKGLSV	P	P	11	2	0.8978	1	0			sp|P98078|DAB2_MOUSE	P98078	DAB2_MOUSE	Dab2	Disabled homolog 2
FVHENIETF	S	L	9	2	0.9888	3	0			sp|B1AZA5|TM245_MOUSE	B1AZA5	TM245_MOUSE	Tmem245	Transmembrane protein 245
FVHMLNATM	E	C	9	2	0.8489	1	0	4M(15.9949), 9M(15.9949)		sp|P26638|SYSC_MOUSE	P26638	SYSC_MOUSE	Sars1	Serine--tRNA ligase, cytoplasmic
FVHNNVISI	Y	Q	9	2	0.8247	1	0			sp|Q924N4|S12A6_MOUSE	Q924N4	S12A6_MOUSE	Slc12a6	Solute carrier family 12 member 6
FVHPGAATVPTM	S	S	12	2	0.9997	10	0	12M(15.9949)		sp|Q9DCP9|DAZP2_MOUSE	Q9DCP9	DAZP2_MOUSE	Dazap2	DAZ-associated protein 2
FVHQNVGEV	L	T	9	2	0.898	1	0			sp|Q80SU7|GVIN1_MOUSE	Q80SU7	GVIN1_MOUSE	Gvin1	Interferon-induced very large GTPase 1
[truncated: 8,242 more rows]
