# Supplementary material for: Mass spectrometry-based thermostability profiling of virus-derived MHC peptide complexes serves as an effective predictor of immunogenicity
Source: Research Square preprint supplement (doi:10.21203/rs.3.rs-5824434/v1), 2025-02-03
Supplement: Supplementary file 2 [file 341fd115141e1454cf48dd54.xlsx]

## Sheet: Sheet1
File Name	Replicate Name	Peptide Sequence	Peptide Sequence Length	Molecule Formula	Peptide Modified Sequence	Peptide Modified Sequence Unimod Ids	Peptide Modified Sequence Three Letter Codes	Peptide Modified Sequence Full Names	Library Dot Product	Isotope Dot Product	Ratio Dot Product	Best Retention Time	Detection Q Value	Precursor Neutral Mass	Precursor Charge	Precursor Mz	Precursor Normalized Area	Predicted Retention Time	Total Area	Total Area MS1	Total Area Fragment	Total Background	Total Background MS1	Total Background Fragment	Total Area Ratio	Total Area Normalized	Protein Name	Protein Accession	Protein Species	Is Decoy
20221010_MS_zenoSWATH_DC24_VACV_37C_r1.wiff	SWATH_r1	LGGNEQVTR	9	C39H68N14O15	LGGNEQVTR	LGGNEQVTR	LGGNEQVTR	LGGNEQVTR	0.9728	#N/A	#N/A	8.24+/-0.03	#N/A	972.499	2	487.257	#N/A	8.32	1516620	#N/A	1516620	10806	#N/A	10806	#N/A	0.011051	Biognosys standards			FALSE
20221010_MS_zenoSWATH_DC24_VACV_37C_r2.wiff	SWATH_r2	LGGNEQVTR	9	C39H68N14O15	LGGNEQVTR	LGGNEQVTR	LGGNEQVTR	LGGNEQVTR	0.9805	#N/A	#N/A	8.24+/-0.03	#N/A	972.499	2	487.257	#N/A	8.32	1025639	#N/A	1025639	9346	#N/A	9346	#N/A	0.010627	Biognosys standards			FALSE
20221010_MS_zenoSWATH_DC24_VACV_37C_r3.wiff	SWATH_r3	LGGNEQVTR	9	C39H68N14O15	LGGNEQVTR	LGGNEQVTR	LGGNEQVTR	LGGNEQVTR	0.978	#N/A	#N/A	8.24+/-0.03	#N/A	972.499	2	487.257	#N/A	8.32	1254483	#N/A	1254483	13467	#N/A	13467	#N/A	0.01099	Biognosys standards			FALSE
20221010_MS_zenoSWATH_DC24_VACV_37C_r1.wiff	SWATH_r1	GAGSSEPVTGLDAK	14	C53H89N15O22	GAGSSEPVTGLDAK	GAGSSEPVTGLDAK	GAGSSEPVTGLDAK	GAGSSEPVTGLDAK	0.9733	#N/A	#N/A	14.73+/-0.01	#N/A	1287.63	2	644.823	#N/A	14.8	2728968	#N/A	2728968	20186	#N/A	20186	#N/A	0.019884	Biognosys standards			FALSE
20221010_MS_zenoSWATH_DC24_VACV_37C_r2.wiff	SWATH_r2	GAGSSEPVTGLDAK	14	C53H89N15O22	GAGSSEPVTGLDAK	GAGSSEPVTGLDAK	GAGSSEPVTGLDAK	GAGSSEPVTGLDAK	0.9777	#N/A	#N/A	14.73+/-0.01	#N/A	1287.63	2	644.823	#N/A	14.8	2051565	#N/A	2051565	10687	#N/A	10687	#N/A	0.021257	Biognosys standards			FALSE
20221010_MS_zenoSWATH_DC24_VACV_37C_r3.wiff	SWATH_r3	GAGSSEPVTGLDAK	14	C53H89N15O22	GAGSSEPVTGLDAK	GAGSSEPVTGLDAK	GAGSSEPVTGLDAK	GAGSSEPVTGLDAK	0.9797	#N/A	#N/A	14.73+/-0.01	#N/A	1287.63	2	644.823	#N/A	14.8	2383006	#N/A	2383006	30854	#N/A	30854	#N/A	0.020876	Biognosys standards			FALSE
20221010_MS_zenoSWATH_DC24_VACV_37C_r1.wiff	SWATH_r1	VEATFGVDESNAK	13	C58H91N15O23	VEATFGVDESNAK	VEATFGVDESNAK	VEATFGVDESNAK	VEATFGVDESNAK	0.9652	#N/A	#N/A	17.58+/-0.02	#N/A	1365.64	2	683.828	#N/A	17.64	2378303	#N/A	2378303	9884	#N/A	9884	#N/A	0.017329	Biognosys standards			FALSE
20221010_MS_zenoSWATH_DC24_VACV_37C_r2.wiff	SWATH_r2	VEATFGVDESNAK	13	C58H91N15O23	VEATFGVDESNAK	VEATFGVDESNAK	VEATFGVDESNAK	VEATFGVDESNAK	0.9674	#N/A	#N/A	17.58+/-0.02	#N/A	1365.64	2	683.828	#N/A	17.64	1587658	#N/A	1587658	14653	#N/A	14653	#N/A	0.01645	Biognosys standards			FALSE
20221010_MS_zenoSWATH_DC24_VACV_37C_r3.wiff	SWATH_r3	VEATFGVDESNAK	13	C58H91N15O23	VEATFGVDESNAK	VEATFGVDESNAK	VEATFGVDESNAK	VEATFGVDESNAK	0.9691	#N/A	#N/A	17.58+/-0.02	#N/A	1365.64	2	683.828	#N/A	17.64	2006213	#N/A	2006213	10419	#N/A	10419	#N/A	0.017575	Biognosys standards			FALSE
20221007_MS_MRMhr_DC24_VACV_37C_r1.wiff	37C_r1	VEATFGVDESNAK	13	C58H91N15O23	VEATFGVDESNAK	VEATFGVDESNAK	VEATFGVDESNAK	VEATFGVDESNAK	0.9789	#N/A	#N/A	17.58+/-0.02	#N/A	1365.64	2	683.828	#N/A	17.64	1145548	#N/A	1145548	2668	#N/A	2668	#N/A	0.009671	Biognosys standards			FALSE
20221007_MS_MRMhr_DC24_VACV_37C_r2.wiff	37C_r2	VEATFGVDESNAK	13	C58H91N15O23	VEATFGVDESNAK	VEATFGVDESNAK	VEATFGVDESNAK	VEATFGVDESNAK	0.9868	#N/A	#N/A	17.58+/-0.02	#N/A	1365.64	2	683.828	#N/A	17.64	1128487	#N/A	1128487	5670	#N/A	5670	#N/A	0.009425	Biognosys standards			FALSE
20221007_MS_MRMhr_DC24_VACV_37C_r3.wiff	37C_r3	VEATFGVDESNAK	13	C58H91N15O23	VEATFGVDESNAK	VEATFGVDESNAK	VEATFGVDESNAK	VEATFGVDESNAK	0.986	#N/A	#N/A	17.58+/-0.02	#N/A	1365.64	2	683.828	#N/A	17.64	1092622	#N/A	1092622	8583	#N/A	8583	#N/A	0.010955	Biognosys standards			FALSE
20221007_MS_MRMhr_DC24_VACV_41C_r1.wiff	41C_r1	VEATFGVDESNAK	13	C58H91N15O23	VEATFGVDESNAK	VEATFGVDESNAK	VEATFGVDESNAK	VEATFGVDESNAK	0.978	#N/A	#N/A	17.58+/-0.02	#N/A	1365.64	2	683.828	#N/A	17.64	1052653	#N/A	1052653	0	#N/A	0	#N/A	0.014834	Biognosys standards			FALSE
20221007_MS_MRMhr_DC24_VACV_41C_r2.wiff	41C_r2	VEATFGVDESNAK	13	C58H91N15O23	VEATFGVDESNAK	VEATFGVDESNAK	VEATFGVDESNAK	VEATFGVDESNAK	0.9942	#N/A	#N/A	17.58+/-0.02	#N/A	1365.64	2	683.828	#N/A	17.64	1126031	#N/A	1126031	0	#N/A	0	#N/A	0.009929	Biognosys standards			FALSE
20221007_MS_MRMhr_DC24_VACV_41C_r3.wiff	41C_r3	VEATFGVDESNAK	13	C58H91N15O23	VEATFGVDESNAK	VEATFGVDESNAK	VEATFGVDESNAK	VEATFGVDESNAK	0.9813	#N/A	#N/A	17.58+/-0.02	#N/A	1365.64	2	683.828	#N/A	17.64	1241405	#N/A	1241405	0	#N/A	0	#N/A	0.009633	Biognosys standards			FALSE
20221007_MS_MRMhr_DC24_VACV_45C_r1.wiff	45C_r1	VEATFGVDESNAK	13	C58H91N15O23	VEATFGVDESNAK	VEATFGVDESNAK	VEATFGVDESNAK	VEATFGVDESNAK	0.9829	#N/A	#N/A	17.58+/-0.02	#N/A	1365.64	2	683.828	#N/A	17.64	873517	#N/A	873517	2740	#N/A	2740	#N/A	0.009116	Biognosys standards			FALSE
20221007_MS_MRMhr_DC24_VACV_45C_r2.wiff	45C_r2	VEATFGVDESNAK	13	C58H91N15O23	VEATFGVDESNAK	VEATFGVDESNAK	VEATFGVDESNAK	VEATFGVDESNAK	0.9888	#N/A	#N/A	17.58+/-0.02	#N/A	1365.64	2	683.828	#N/A	17.64	1068325	#N/A	1068325	6373	#N/A	6373	#N/A	0.010464	Biognosys standards			FALSE
20221007_MS_MRMhr_DC24_VACV_45C_r3.wiff	45C_r3	VEATFGVDESNAK	13	C58H91N15O23	VEATFGVDESNAK	VEATFGVDESNAK	VEATFGVDESNAK	VEATFGVDESNAK	0.9905	#N/A	#N/A	17.58+/-0.02	#N/A	1365.64	2	683.828	#N/A	17.64	1138019	#N/A	1138019	0	#N/A	0	#N/A	0.010316	Biognosys standards			FALSE
20221007_MS_MRMhr_DC24_VACV_49C_r1.wiff	49C_r1	VEATFGVDESNAK	13	C58H91N15O23	VEATFGVDESNAK	VEATFGVDESNAK	VEATFGVDESNAK	VEATFGVDESNAK	0.989	#N/A	#N/A	17.58+/-0.02	#N/A	1365.64	2	683.828	#N/A	17.64	999283	#N/A	999283	0	#N/A	0	#N/A	0.016589	Biognosys standards			FALSE
20221007_MS_MRMhr_DC24_VACV_49C_r2.wiff	49C_r2	VEATFGVDESNAK	13	C58H91N15O23	VEATFGVDESNAK	VEATFGVDESNAK	VEATFGVDESNAK	VEATFGVDESNAK	0.9866	#N/A	#N/A	17.58+/-0.02	#N/A	1365.64	2	683.828	#N/A	17.64	998922	#N/A	998922	10965	#N/A	10965	#N/A	0.012965	Biognosys standards			FALSE
20221007_MS_MRMhr_DC24_VACV_49C_r3.wiff	49C_r3	VEATFGVDESNAK	13	C58H91N15O23	VEATFGVDESNAK	VEATFGVDESNAK	VEATFGVDESNAK	VEATFGVDESNAK	0.9805	#N/A	#N/A	17.58+/-0.02	#N/A	1365.64	2	683.828	#N/A	17.64	1020766	#N/A	1020766	0	#N/A	0	#N/A	0.016512	Biognosys standards			FALSE
20221007_MS_MRMhr_DC24_VACV_53C_r1.wiff	53C_r1	VEATFGVDESNAK	13	C58H91N15O23	VEATFGVDESNAK	VEATFGVDESNAK	VEATFGVDESNAK	VEATFGVDESNAK	0.9772	#N/A	#N/A	17.58+/-0.02	#N/A	1365.64	2	683.828	#N/A	17.64	985267	#N/A	985267	0	#N/A	0	#N/A	0.016571	Biognosys standards			FALSE
20221007_MS_MRMhr_DC24_VACV_53C_r2.wiff	53C_r2	VEATFGVDESNAK	13	C58H91N15O23	VEATFGVDESNAK	VEATFGVDESNAK	VEATFGVDESNAK	VEATFGVDESNAK	0.9915	#N/A	#N/A	17.58+/-0.02	#N/A	1365.64	2	683.828	#N/A	17.64	1127935	#N/A	1127935	4903	#N/A	4903	#N/A	0.026342	Biognosys standards			FALSE
20221007_MS_MRMhr_DC24_VACV_53C_r3.wiff	53C_r3	VEATFGVDESNAK	13	C58H91N15O23	VEATFGVDESNAK	VEATFGVDESNAK	VEATFGVDESNAK	VEATFGVDESNAK	0.9785	#N/A	#N/A	17.58+/-0.02	#N/A	1365.64	2	683.828	#N/A	17.64	1074810	#N/A	1074810	0	#N/A	0	#N/A	0.019569	Biognosys standards			FALSE
20221007_MS_MRMhr_DC24_VACV_57C_r1.wiff	57C_r1	VEATFGVDESNAK	13	C58H91N15O23	VEATFGVDESNAK	VEATFGVDESNAK	VEATFGVDESNAK	VEATFGVDESNAK	0.9909	#N/A	#N/A	17.58+/-0.02	#N/A	1365.64	2	683.828	#N/A	17.64	975236	#N/A	975236	8116	#N/A	8116	#N/A	0.029498	Biognosys standards			FALSE
20221007_MS_MRMhr_DC24_VACV_57C_r2.wiff	57C_r2	VEATFGVDESNAK	13	C58H91N15O23	VEATFGVDESNAK	VEATFGVDESNAK	VEATFGVDESNAK	VEATFGVDESNAK	0.9725	#N/A	#N/A	17.58+/-0.02	#N/A	1365.64	2	683.828	#N/A	17.64	1152311	#N/A	1152311	0	#N/A	0	#N/A	0.03724	Biognosys standards			FALSE
20221007_MS_MRMhr_DC24_VACV_57C_r3.wiff	57C_r3	VEATFGVDESNAK	13	C58H91N15O23	VEATFGVDESNAK	VEATFGVDESNAK	VEATFGVDESNAK	VEATFGVDESNAK	0.9836	#N/A	#N/A	17.58+/-0.02	#N/A	1365.64	2	683.828	#N/A	17.64	971033	#N/A	971033	0	#N/A	0	#N/A	0.036787	Biognosys standards			FALSE
20221007_MS_MRMhr_DC24_VACV_61C_r1.wiff	61C_r1	VEATFGVDESNAK	13	C58H91N15O23	VEATFGVDESNAK	VEATFGVDESNAK	VEATFGVDESNAK	VEATFGVDESNAK	0.9826	#N/A	#N/A	17.58+/-0.02	#N/A	1365.64	2	683.828	#N/A	17.64	1039769	#N/A	1039769	0	#N/A	0	#N/A	0.049014	Biognosys standards			FALSE
20221007_MS_MRMhr_DC24_VACV_61C_r2.wiff	61C_r2	VEATFGVDESNAK	13	C58H91N15O23	VEATFGVDESNAK	VEATFGVDESNAK	VEATFGVDESNAK	VEATFGVDESNAK	0.9764	#N/A	#N/A	17.58+/-0.02	#N/A	1365.64	2	683.828	#N/A	17.64	997095	#N/A	997095	10008	#N/A	10008	#N/A	0.047801	Biognosys standards			FALSE
20221007_MS_MRMhr_DC24_VACV_61C_r3.wiff	61C_r3	VEATFGVDESNAK	13	C58H91N15O23	VEATFGVDESNAK	VEATFGVDESNAK	VEATFGVDESNAK	VEATFGVDESNAK	0.982	#N/A	#N/A	17.58+/-0.02	#N/A	1365.64	2	683.828	#N/A	17.64	1104068	#N/A	1104068	0	#N/A	0	#N/A	0.047377	Biognosys standards			FALSE
20221007_MS_MRMhr_DC24_VACV_65C_r1.wiff	65C_r1	VEATFGVDESNAK	13	C58H91N15O23	VEATFGVDESNAK	VEATFGVDESNAK	VEATFGVDESNAK	VEATFGVDESNAK	0.9925	#N/A	#N/A	17.58+/-0.02	#N/A	1365.64	2	683.828	#N/A	17.64	1074459	#N/A	1074459	0	#N/A	0	#N/A	âˆž	Biognosys standards			FALSE
20221007_MS_MRMhr_DC24_VACV_65C_r2.wiff	65C_r2	VEATFGVDESNAK	13	C58H91N15O23	VEATFGVDESNAK	VEATFGVDESNAK	VEATFGVDESNAK	VEATFGVDESNAK	0.9816	#N/A	#N/A	17.58+/-0.02	#N/A	1365.64	2	683.828	#N/A	17.64	1060099	#N/A	1060099	3647	#N/A	3647	#N/A	âˆž	Biognosys standards			FALSE
20221007_MS_MRMhr_DC24_VACV_65C_r3.wiff	65C_r3	VEATFGVDESNAK	13	C58H91N15O23	VEATFGVDESNAK	VEATFGVDESNAK	VEATFGVDESNAK	VEATFGVDESNAK	0.4988	#N/A	#N/A	17.58+/-0.02	#N/A	1365.64	2	683.828	#N/A	17.64	11107	#N/A	11107	0	#N/A	0	#N/A	0.647917	Biognosys standards			FALSE
20221007_MS_MRMhr_DC24_VACV_69C_r1.wiff	69C_r1	VEATFGVDESNAK	13	C58H91N15O23	VEATFGVDESNAK	VEATFGVDESNAK	VEATFGVDESNAK	VEATFGVDESNAK	0.9838	#N/A	#N/A	17.58+/-0.02	#N/A	1365.64	2	683.828	#N/A	17.64	1137778	#N/A	1137778	7452	#N/A	7452	#N/A	âˆž	Biognosys standards			FALSE
20221007_MS_MRMhr_DC24_VACV_69C_r2.wiff	69C_r2	VEATFGVDESNAK	13	C58H91N15O23	VEATFGVDESNAK	VEATFGVDESNAK	VEATFGVDESNAK	VEATFGVDESNAK	0.9937	#N/A	#N/A	17.58+/-0.02	#N/A	1365.64	2	683.828	#N/A	17.64	963492	#N/A	963492	0	#N/A	0	#N/A	âˆž	Biognosys standards			FALSE
20221007_MS_MRMhr_DC24_VACV_69C_r3.wiff	69C_r3	VEATFGVDESNAK	13	C58H91N15O23	VEATFGVDESNAK	VEATFGVDESNAK	VEATFGVDESNAK	VEATFGVDESNAK	0.9924	#N/A	#N/A	17.58+/-0.02	#N/A	1365.64	2	683.828	#N/A	17.64	992971	#N/A	992971	0	#N/A	0	#N/A	âˆž	Biognosys standards			FALSE
20221007_MS_MRMhr_DC24_VACV_73C_r1.wiff	73C_r1	VEATFGVDESNAK	13	C58H91N15O23	VEATFGVDESNAK	VEATFGVDESNAK	VEATFGVDESNAK	VEATFGVDESNAK	0.9837	#N/A	#N/A	17.58+/-0.02	#N/A	1365.64	2	683.828	#N/A	17.64	1032769	#N/A	1032769	0	#N/A	0	#N/A	âˆž	Biognosys standards			FALSE
20221007_MS_MRMhr_DC24_VACV_73C_r2.wiff	73C_r2	VEATFGVDESNAK	13	C58H91N15O23	VEATFGVDESNAK	VEATFGVDESNAK	VEATFGVDESNAK	VEATFGVDESNAK	0.9905	#N/A	#N/A	17.58+/-0.02	#N/A	1365.64	2	683.828	#N/A	17.64	1108095	#N/A	1108095	0	#N/A	0	#N/A	âˆž	Biognosys standards			FALSE
20221007_MS_MRMhr_DC24_VACV_73C_r3.wiff	73C_r3	VEATFGVDESNAK	13	C58H91N15O23	VEATFGVDESNAK	VEATFGVDESNAK	VEATFGVDESNAK	VEATFGVDESNAK	0.9955	#N/A	#N/A	17.58+/-0.02	#N/A	1365.64	2	683.828	#N/A	17.64	1040182	#N/A	1040182	4893	#N/A	4893	#N/A	âˆž	Biognosys standards			FALSE
20221010_MS_zenoSWATH_DC24_VACV_37C_r1.wiff	SWATH_r1	YILAGVENSK	10	C49H80N12O16	YILAGVENSK	YILAGVENSK	YILAGVENSK	YILAGVENSK	0.9432	#N/A	#N/A	19.55+/-0.13	#N/A	1092.58	2	547.298	#N/A	19.62	6358049	#N/A	6358049	55073	#N/A	55073	#N/A	0.046327	Biognosys standards			FALSE
20221010_MS_zenoSWATH_DC24_VACV_37C_r2.wiff	SWATH_r2	YILAGVENSK	10	C49H80N12O16	YILAGVENSK	YILAGVENSK	YILAGVENSK	YILAGVENSK	0.9634	#N/A	#N/A	19.55+/-0.13	#N/A	1092.58	2	547.298	#N/A	19.62	4434954	#N/A	4434954	27090	#N/A	27090	#N/A	0.045952	Biognosys standards			FALSE
20221010_MS_zenoSWATH_DC24_VACV_37C_r3.wiff	SWATH_r3	YILAGVENSK	10	C49H80N12O16	YILAGVENSK	YILAGVENSK	YILAGVENSK	YILAGVENSK	0.9543	#N/A	#N/A	19.55+/-0.13	#N/A	1092.58	2	547.298	#N/A	19.62	5582015	#N/A	5582015	45014	#N/A	45014	#N/A	0.048901	Biognosys standards			FALSE
20221007_MS_MRMhr_DC24_VACV_37C_r1.wiff	37C_r1	YILAGVENSK	10	C49H80N12O16	YILAGVENSK	YILAGVENSK	YILAGVENSK	YILAGVENSK	0.9832	#N/A	#N/A	19.55+/-0.13	#N/A	1092.58	2	547.298	#N/A	19.62	4471470	#N/A	4471470	24296	#N/A	24296	#N/A	0.03775	Biognosys standards			FALSE
20221007_MS_MRMhr_DC24_VACV_37C_r2.wiff	37C_r2	YILAGVENSK	10	C49H80N12O16	YILAGVENSK	YILAGVENSK	YILAGVENSK	YILAGVENSK	0.9921	#N/A	#N/A	19.55+/-0.13	#N/A	1092.58	2	547.298	#N/A	19.62	4353808	#N/A	4353808	33951	#N/A	33951	#N/A	0.036361	Biognosys standards			FALSE
20221007_MS_MRMhr_DC24_VACV_37C_r3.wiff	37C_r3	YILAGVENSK	10	C49H80N12O16	YILAGVENSK	YILAGVENSK	YILAGVENSK	YILAGVENSK	0.9822	#N/A	#N/A	19.55+/-0.13	#N/A	1092.58	2	547.298	#N/A	19.62	4049290	#N/A	4049290	33698	#N/A	33698	#N/A	0.040599	Biognosys standards			FALSE
20221007_MS_MRMhr_DC24_VACV_41C_r1.wiff	41C_r1	YILAGVENSK	10	C49H80N12O16	YILAGVENSK	YILAGVENSK	YILAGVENSK	YILAGVENSK	0.9842	#N/A	#N/A	19.55+/-0.13	#N/A	1092.58	2	547.298	#N/A	19.62	3705219	#N/A	3705219	728	#N/A	728	#N/A	0.052215	Biognosys standards			FALSE
20221007_MS_MRMhr_DC24_VACV_41C_r2.wiff	41C_r2	YILAGVENSK	10	C49H80N12O16	YILAGVENSK	YILAGVENSK	YILAGVENSK	YILAGVENSK	0.9872	#N/A	#N/A	19.55+/-0.13	#N/A	1092.58	2	547.298	#N/A	19.62	4580409	#N/A	4580409	5534	#N/A	5534	#N/A	0.040389	Biognosys standards			FALSE
20221007_MS_MRMhr_DC24_VACV_41C_r3.wiff	41C_r3	YILAGVENSK	10	C49H80N12O16	YILAGVENSK	YILAGVENSK	YILAGVENSK	YILAGVENSK	0.9604	#N/A	#N/A	19.55+/-0.13	#N/A	1092.58	2	547.298	#N/A	19.62	4028930	#N/A	4028930	46580	#N/A	46580	#N/A	0.031265	Biognosys standards			FALSE
20221007_MS_MRMhr_DC24_VACV_45C_r1.wiff	45C_r1	YILAGVENSK	10	C49H80N12O16	YILAGVENSK	YILAGVENSK	YILAGVENSK	YILAGVENSK	0.9816	#N/A	#N/A	19.55+/-0.13	#N/A	1092.58	2	547.298	#N/A	19.62	3799978	#N/A	3799978	13532	#N/A	13532	#N/A	0.039658	Biognosys standards			FALSE
20221007_MS_MRMhr_DC24_VACV_45C_r2.wiff	45C_r2	YILAGVENSK	10	C49H80N12O16	YILAGVENSK	YILAGVENSK	YILAGVENSK	YILAGVENSK	0.975	#N/A	#N/A	19.55+/-0.13	#N/A	1092.58	2	547.298	#N/A	19.62	4507561	#N/A	4507561	35506	#N/A	35506	#N/A	0.044151	Biognosys standards			FALSE
20221007_MS_MRMhr_DC24_VACV_45C_r3.wiff	45C_r3	YILAGVENSK	10	C49H80N12O16	YILAGVENSK	YILAGVENSK	YILAGVENSK	YILAGVENSK	0.9778	#N/A	#N/A	19.55+/-0.13	#N/A	1092.58	2	547.298	#N/A	19.62	4497957	#N/A	4497957	60603	#N/A	60603	#N/A	0.040775	Biognosys standards			FALSE
20221007_MS_MRMhr_DC24_VACV_49C_r1.wiff	49C_r1	YILAGVENSK	10	C49H80N12O16	YILAGVENSK	YILAGVENSK	YILAGVENSK	YILAGVENSK	0.9853	#N/A	#N/A	19.55+/-0.13	#N/A	1092.58	2	547.298	#N/A	19.62	4052987	#N/A	4052987	20224	#N/A	20224	#N/A	0.067284	Biognosys standards			FALSE
20221007_MS_MRMhr_DC24_VACV_49C_r2.wiff	49C_r2	YILAGVENSK	10	C49H80N12O16	YILAGVENSK	YILAGVENSK	YILAGVENSK	YILAGVENSK	0.9702	#N/A	#N/A	19.55+/-0.13	#N/A	1092.58	2	547.298	#N/A	19.62	4189899	#N/A	4189899	63890	#N/A	63890	#N/A	0.054382	Biognosys standards			FALSE
20221007_MS_MRMhr_DC24_VACV_49C_r3.wiff	49C_r3	YILAGVENSK	10	C49H80N12O16	YILAGVENSK	YILAGVENSK	YILAGVENSK	YILAGVENSK	0.9794	#N/A	#N/A	19.55+/-0.13	#N/A	1092.58	2	547.298	#N/A	19.62	3373754	#N/A	3373754	31983	#N/A	31983	#N/A	0.054573	Biognosys standards			FALSE
20221007_MS_MRMhr_DC24_VACV_53C_r1.wiff	53C_r1	YILAGVENSK	10	C49H80N12O16	YILAGVENSK	YILAGVENSK	YILAGVENSK	YILAGVENSK	0.9753	#N/A	#N/A	19.55+/-0.13	#N/A	1092.58	2	547.298	#N/A	19.62	4367276	#N/A	4367276	4526	#N/A	4526	#N/A	0.073453	Biognosys standards			FALSE
20221007_MS_MRMhr_DC24_VACV_53C_r2.wiff	53C_r2	YILAGVENSK	10	C49H80N12O16	YILAGVENSK	YILAGVENSK	YILAGVENSK	YILAGVENSK	0.9871	#N/A	#N/A	19.55+/-0.13	#N/A	1092.58	2	547.298	#N/A	19.62	4411710	#N/A	4411710	49767	#N/A	49767	#N/A	0.103033	Biognosys standards			FALSE
20221007_MS_MRMhr_DC24_VACV_53C_r3.wiff	53C_r3	YILAGVENSK	10	C49H80N12O16	YILAGVENSK	YILAGVENSK	YILAGVENSK	YILAGVENSK	0.9649	#N/A	#N/A	19.55+/-0.13	#N/A	1092.58	2	547.298	#N/A	19.62	5133915	#N/A	5133915	58515	#N/A	58515	#N/A	0.093475	Biognosys standards			FALSE
20221007_MS_MRMhr_DC24_VACV_57C_r1.wiff	57C_r1	YILAGVENSK	10	C49H80N12O16	YILAGVENSK	YILAGVENSK	YILAGVENSK	YILAGVENSK	0.9921	#N/A	#N/A	19.55+/-0.13	#N/A	1092.58	2	547.298	#N/A	19.62	4546800	#N/A	4546800	46933	#N/A	46933	#N/A	0.137528	Biognosys standards			FALSE
20221007_MS_MRMhr_DC24_VACV_57C_r2.wiff	57C_r2	YILAGVENSK	10	C49H80N12O16	YILAGVENSK	YILAGVENSK	YILAGVENSK	YILAGVENSK	0.9789	#N/A	#N/A	19.55+/-0.13	#N/A	1092.58	2	547.298	#N/A	19.62	4395175	#N/A	4395175	21038	#N/A	21038	#N/A	0.142042	Biognosys standards			FALSE
20221007_MS_MRMhr_DC24_VACV_57C_r3.wiff	57C_r3	YILAGVENSK	10	C49H80N12O16	YILAGVENSK	YILAGVENSK	YILAGVENSK	YILAGVENSK	0.9832	#N/A	#N/A	19.55+/-0.13	#N/A	1092.58	2	547.298	#N/A	19.62	3988901	#N/A	3988901	32012	#N/A	32012	#N/A	0.151115	Biognosys standards			FALSE
20221007_MS_MRMhr_DC24_VACV_61C_r1.wiff	61C_r1	YILAGVENSK	10	C49H80N12O16	YILAGVENSK	YILAGVENSK	YILAGVENSK	YILAGVENSK	0.991	#N/A	#N/A	19.55+/-0.13	#N/A	1092.58	2	547.298	#N/A	19.62	4070197	#N/A	4070197	60160	#N/A	60160	#N/A	0.191868	Biognosys standards			FALSE
20221007_MS_MRMhr_DC24_VACV_61C_r2.wiff	61C_r2	YILAGVENSK	10	C49H80N12O16	YILAGVENSK	YILAGVENSK	YILAGVENSK	YILAGVENSK	0.9956	#N/A	#N/A	19.55+/-0.13	#N/A	1092.58	2	547.298	#N/A	19.62	4510194	#N/A	4510194	8568	#N/A	8568	#N/A	0.216219	Biognosys standards			FALSE
20221007_MS_MRMhr_DC24_VACV_61C_r3.wiff	61C_r3	YILAGVENSK	10	C49H80N12O16	YILAGVENSK	YILAGVENSK	YILAGVENSK	YILAGVENSK	0.984	#N/A	#N/A	19.55+/-0.13	#N/A	1092.58	2	547.298	#N/A	19.62	4323441	#N/A	4323441	25164	#N/A	25164	#N/A	0.185525	Biognosys standards			FALSE
20221007_MS_MRMhr_DC24_VACV_65C_r1.wiff	65C_r1	YILAGVENSK	10	C49H80N12O16	YILAGVENSK	YILAGVENSK	YILAGVENSK	YILAGVENSK	0.987	#N/A	#N/A	19.55+/-0.13	#N/A	1092.58	2	547.298	#N/A	19.62	3997669	#N/A	3997669	24098	#N/A	24098	#N/A	âˆž	Biognosys standards			FALSE
20221007_MS_MRMhr_DC24_VACV_65C_r2.wiff	65C_r2	YILAGVENSK	10	C49H80N12O16	YILAGVENSK	YILAGVENSK	YILAGVENSK	YILAGVENSK	0.9808	#N/A	#N/A	19.55+/-0.13	#N/A	1092.58	2	547.298	#N/A	19.62	4394095	#N/A	4394095	15013	#N/A	15013	#N/A	âˆž	Biognosys standards			FALSE
20221007_MS_MRMhr_DC24_VACV_65C_r3.wiff	65C_r3	YILAGVENSK	10	C49H80N12O16	YILAGVENSK	YILAGVENSK	YILAGVENSK	YILAGVENSK	0.5444	#N/A	#N/A	19.55+/-0.13	#N/A	1092.58	2	547.298	#N/A	19.62	6036	#N/A	6036	0	#N/A	0	#N/A	0.352083	Biognosys standards			FALSE
20221007_MS_MRMhr_DC24_VACV_69C_r1.wiff	69C_r1	YILAGVENSK	10	C49H80N12O16	YILAGVENSK	YILAGVENSK	YILAGVENSK	YILAGVENSK	0.9785	#N/A	#N/A	19.55+/-0.13	#N/A	1092.58	2	547.298	#N/A	19.62	4105869	#N/A	4105869	47416	#N/A	47416	#N/A	âˆž	Biognosys standards			FALSE
20221007_MS_MRMhr_DC24_VACV_69C_r2.wiff	69C_r2	YILAGVENSK	10	C49H80N12O16	YILAGVENSK	YILAGVENSK	YILAGVENSK	YILAGVENSK	0.9736	#N/A	#N/A	19.55+/-0.13	#N/A	1092.58	2	547.298	#N/A	19.62	2886479	#N/A	2886479	15076	#N/A	15076	#N/A	âˆž	Biognosys standards			FALSE
20221007_MS_MRMhr_DC24_VACV_69C_r3.wiff	69C_r3	YILAGVENSK	10	C49H80N12O16	YILAGVENSK	YILAGVENSK	YILAGVENSK	YILAGVENSK	0.9819	#N/A	#N/A	19.55+/-0.13	#N/A	1092.58	2	547.298	#N/A	19.62	4569910	#N/A	4569910	35079	#N/A	35079	#N/A	âˆž	Biognosys standards			FALSE
20221007_MS_MRMhr_DC24_VACV_73C_r1.wiff	73C_r1	YILAGVENSK	10	C49H80N12O16	YILAGVENSK	YILAGVENSK	YILAGVENSK	YILAGVENSK	0.9824	#N/A	#N/A	19.55+/-0.13	#N/A	1092.58	2	547.298	#N/A	19.62	3939246	#N/A	3939246	46911	#N/A	46911	#N/A	âˆž	Biognosys standards			FALSE
20221007_MS_MRMhr_DC24_VACV_73C_r2.wiff	73C_r2	YILAGVENSK	10	C49H80N12O16	YILAGVENSK	YILAGVENSK	YILAGVENSK	YILAGVENSK	0.9772	#N/A	#N/A	19.55+/-0.13	#N/A	1092.58	2	547.298	#N/A	19.62	3435494	#N/A	3435494	17734	#N/A	17734	#N/A	âˆž	Biognosys standards			FALSE
20221007_MS_MRMhr_DC24_VACV_73C_r3.wiff	73C_r3	YILAGVENSK	10	C49H80N12O16	YILAGVENSK	YILAGVENSK	YILAGVENSK	YILAGVENSK	0.9843	#N/A	#N/A	19.55+/-0.13	#N/A	1092.58	2	547.298	#N/A	19.62	3688292	#N/A	3688292	66984	#N/A	66984	#N/A	âˆž	Biognosys standards			FALSE
20221010_MS_zenoSWATH_DC24_VACV_37C_r1.wiff	SWATH_r1	TPVISGGPYEYR	12	C61H91N15O19	TPVISGGPYEYR	TPVISGGPYEYR	TPVISGGPYEYR	TPVISGGPYEYR	0.9867	#N/A	#N/A	22.03+/-2.44	#N/A	1337.66	2	669.838	#N/A	21.66	3668716	#N/A	3668716	40676	#N/A	40676	#N/A	0.026732	Biognosys standards			FALSE
20221010_MS_zenoSWATH_DC24_VACV_37C_r2.wiff	SWATH_r2	TPVISGGPYEYR	12	C61H91N15O19	TPVISGGPYEYR	TPVISGGPYEYR	TPVISGGPYEYR	TPVISGGPYEYR	0.989	#N/A	#N/A	22.03+/-2.44	#N/A	1337.66	2	669.838	#N/A	21.66	2570869	#N/A	2570869	14117	#N/A	14117	#N/A	0.026638	Biognosys standards			FALSE
20221010_MS_zenoSWATH_DC24_VACV_37C_r3.wiff	SWATH_r3	TPVISGGPYEYR	12	C61H91N15O19	TPVISGGPYEYR	TPVISGGPYEYR	TPVISGGPYEYR	TPVISGGPYEYR	0.9855	#N/A	#N/A	22.03+/-2.44	#N/A	1337.66	2	669.838	#N/A	21.66	3427193	#N/A	3427193	16270	#N/A	16270	#N/A	0.030024	Biognosys standards			FALSE
20221007_MS_MRMhr_DC24_VACV_37C_r1.wiff	37C_r1	TPVISGGPYEYR	12	C61H91N15O19	TPVISGGPYEYR	TPVISGGPYEYR	TPVISGGPYEYR	TPVISGGPYEYR	0.9867	#N/A	#N/A	22.03+/-2.44	#N/A	1337.66	2	669.838	#N/A	21.66	2475062	#N/A	2475062	2658	#N/A	2658	#N/A	0.020895	Biognosys standards			FALSE
20221007_MS_MRMhr_DC24_VACV_37C_r2.wiff	37C_r2	TPVISGGPYEYR	12	C61H91N15O19	TPVISGGPYEYR	TPVISGGPYEYR	TPVISGGPYEYR	TPVISGGPYEYR	0.9879	#N/A	#N/A	22.03+/-2.44	#N/A	1337.66	2	669.838	#N/A	21.66	2665149	#N/A	2665149	7912	#N/A	7912	#N/A	0.022258	Biognosys standards			FALSE
20221007_MS_MRMhr_DC24_VACV_37C_r3.wiff	37C_r3	TPVISGGPYEYR	12	C61H91N15O19	TPVISGGPYEYR	TPVISGGPYEYR	TPVISGGPYEYR	TPVISGGPYEYR	0.992	#N/A	#N/A	22.03+/-2.44	#N/A	1337.66	2	669.838	#N/A	21.66	2085394	#N/A	2085394	20287	#N/A	20287	#N/A	0.020909	Biognosys standards			FALSE
20221007_MS_MRMhr_DC24_VACV_41C_r1.wiff	41C_r1	TPVISGGPYEYR	12	C61H91N15O19	TPVISGGPYEYR	TPVISGGPYEYR	TPVISGGPYEYR	TPVISGGPYEYR	0.9885	#N/A	#N/A	22.03+/-2.44	#N/A	1337.66	2	669.838	#N/A	21.66	1987822	#N/A	1987822	14830	#N/A	14830	#N/A	0.028013	Biognosys standards			FALSE
20221007_MS_MRMhr_DC24_VACV_41C_r2.wiff	41C_r2	TPVISGGPYEYR	12	C61H91N15O19	TPVISGGPYEYR	TPVISGGPYEYR	TPVISGGPYEYR	TPVISGGPYEYR	0.9747	#N/A	#N/A	22.03+/-2.44	#N/A	1337.66	2	669.838	#N/A	21.66	2233854	#N/A	2233854	10539	#N/A	10539	#N/A	0.019697	Biognosys standards			FALSE
20221007_MS_MRMhr_DC24_VACV_41C_r3.wiff	41C_r3	TPVISGGPYEYR	12	C61H91N15O19	TPVISGGPYEYR	TPVISGGPYEYR	TPVISGGPYEYR	TPVISGGPYEYR	0.9927	#N/A	#N/A	22.03+/-2.44	#N/A	1337.66	2	669.838	#N/A	21.66	2576173	#N/A	2576173	0	#N/A	0	#N/A	0.019991	Biognosys standards			FALSE
20221007_MS_MRMhr_DC24_VACV_45C_r1.wiff	45C_r1	TPVISGGPYEYR	12	C61H91N15O19	TPVISGGPYEYR	TPVISGGPYEYR	TPVISGGPYEYR	TPVISGGPYEYR	0.9896	#N/A	#N/A	22.03+/-2.44	#N/A	1337.66	2	669.838	#N/A	21.66	2111563	#N/A	2111563	20053	#N/A	20053	#N/A	0.022037	Biognosys standards			FALSE
20221007_MS_MRMhr_DC24_VACV_45C_r2.wiff	45C_r2	TPVISGGPYEYR	12	C61H91N15O19	TPVISGGPYEYR	TPVISGGPYEYR	TPVISGGPYEYR	TPVISGGPYEYR	0.9798	#N/A	#N/A	22.03+/-2.44	#N/A	1337.66	2	669.838	#N/A	21.66	2380227	#N/A	2380227	0	#N/A	0	#N/A	0.023314	Biognosys standards			FALSE
20221007_MS_MRMhr_DC24_VACV_45C_r3.wiff	45C_r3	TPVISGGPYEYR	12	C61H91N15O19	TPVISGGPYEYR	TPVISGGPYEYR	TPVISGGPYEYR	TPVISGGPYEYR	0.9787	#N/A	#N/A	22.03+/-2.44	#N/A	1337.66	2	669.838	#N/A	21.66	2598723	#N/A	2598723	0	#N/A	0	#N/A	0.023558	Biognosys standards			FALSE
20221007_MS_MRMhr_DC24_VACV_49C_r1.wiff	49C_r1	TPVISGGPYEYR	12	C61H91N15O19	TPVISGGPYEYR	TPVISGGPYEYR	TPVISGGPYEYR	TPVISGGPYEYR	0.9846	#N/A	#N/A	22.03+/-2.44	#N/A	1337.66	2	669.838	#N/A	21.66	2395570	#N/A	2395570	0	#N/A	0	#N/A	0.039769	Biognosys standards			FALSE
20221007_MS_MRMhr_DC24_VACV_49C_r2.wiff	49C_r2	TPVISGGPYEYR	12	C61H91N15O19	TPVISGGPYEYR	TPVISGGPYEYR	TPVISGGPYEYR	TPVISGGPYEYR	0.9907	#N/A	#N/A	22.03+/-2.44	#N/A	1337.66	2	669.838	#N/A	21.66	2211908	#N/A	2211908	4818	#N/A	4818	#N/A	0.028709	Biognosys standards			FALSE
20221007_MS_MRMhr_DC24_VACV_49C_r3.wiff	49C_r3	TPVISGGPYEYR	12	C61H91N15O19	TPVISGGPYEYR	TPVISGGPYEYR	TPVISGGPYEYR	TPVISGGPYEYR	0.9699	#N/A	#N/A	22.03+/-2.44	#N/A	1337.66	2	669.838	#N/A	21.66	2157145	#N/A	2157145	0	#N/A	0	#N/A	0.034893	Biognosys standards			FALSE
20221007_MS_MRMhr_DC24_VACV_53C_r1.wiff	53C_r1	TPVISGGPYEYR	12	C61H91N15O19	TPVISGGPYEYR	TPVISGGPYEYR	TPVISGGPYEYR	TPVISGGPYEYR	0.99	#N/A	#N/A	22.03+/-2.44	#N/A	1337.66	2	669.838	#N/A	21.66	2386094	#N/A	2386094	6037	#N/A	6037	#N/A	0.040131	Biognosys standards			FALSE
20221007_MS_MRMhr_DC24_VACV_53C_r2.wiff	53C_r2	TPVISGGPYEYR	12	C61H91N15O19	TPVISGGPYEYR	TPVISGGPYEYR	TPVISGGPYEYR	TPVISGGPYEYR	0.9864	#N/A	#N/A	22.03+/-2.44	#N/A	1337.66	2	669.838	#N/A	21.66	2290003	#N/A	2290003	16305	#N/A	16305	#N/A	0.053482	Biognosys standards			FALSE
20221007_MS_MRMhr_DC24_VACV_53C_r3.wiff	53C_r3	TPVISGGPYEYR	12	C61H91N15O19	TPVISGGPYEYR	TPVISGGPYEYR	TPVISGGPYEYR	TPVISGGPYEYR	0.9723	#N/A	#N/A	22.03+/-2.44	#N/A	1337.66	2	669.838	#N/A	21.66	2542926	#N/A	2542926	7751	#N/A	7751	#N/A	0.0463	Biognosys standards			FALSE
20221007_MS_MRMhr_DC24_VACV_57C_r1.wiff	57C_r1	TPVISGGPYEYR	12	C61H91N15O19	TPVISGGPYEYR	TPVISGGPYEYR	TPVISGGPYEYR	TPVISGGPYEYR	0.9941	#N/A	#N/A	22.03+/-2.44	#N/A	1337.66	2	669.838	#N/A	21.66	2188523	#N/A	2188523	15978	#N/A	15978	#N/A	0.066197	Biognosys standards			FALSE
20221007_MS_MRMhr_DC24_VACV_57C_r2.wiff	57C_r2	TPVISGGPYEYR	12	C61H91N15O19	TPVISGGPYEYR	TPVISGGPYEYR	TPVISGGPYEYR	TPVISGGPYEYR	0.9488	#N/A	#N/A	22.03+/-2.44	#N/A	1337.66	2	669.838	#N/A	21.66	2166186	#N/A	2166186	3481	#N/A	3481	#N/A	0.070006	Biognosys standards			FALSE
20221007_MS_MRMhr_DC24_VACV_57C_r3.wiff	57C_r3	TPVISGGPYEYR	12	C61H91N15O19	TPVISGGPYEYR	TPVISGGPYEYR	TPVISGGPYEYR	TPVISGGPYEYR	0.9799	#N/A	#N/A	22.03+/-2.44	#N/A	1337.66	2	669.838	#N/A	21.66	2422263	#N/A	2422263	7227	#N/A	7227	#N/A	0.091765	Biognosys standards			FALSE
20221007_MS_MRMhr_DC24_VACV_61C_r1.wiff	61C_r1	TPVISGGPYEYR	12	C61H91N15O19	TPVISGGPYEYR	TPVISGGPYEYR	TPVISGGPYEYR	TPVISGGPYEYR	0.9804	#N/A	#N/A	22.03+/-2.44	#N/A	1337.66	2	669.838	#N/A	21.66	2402047	#N/A	2402047	4387	#N/A	4387	#N/A	0.113232	Biognosys standards			FALSE
20221007_MS_MRMhr_DC24_VACV_61C_r2.wiff	61C_r2	TPVISGGPYEYR	12	C61H91N15O19	TPVISGGPYEYR	TPVISGGPYEYR	TPVISGGPYEYR	TPVISGGPYEYR	0.9727	#N/A	#N/A	22.03+/-2.44	#N/A	1337.66	2	669.838	#N/A	21.66	2355877	#N/A	2355877	18162	#N/A	18162	#N/A	0.112941	Biognosys standards			FALSE
20221007_MS_MRMhr_DC24_VACV_61C_r3.wiff	61C_r3	TPVISGGPYEYR	12	C61H91N15O19	TPVISGGPYEYR	TPVISGGPYEYR	TPVISGGPYEYR	TPVISGGPYEYR	0.9767	#N/A	#N/A	22.03+/-2.44	#N/A	1337.66	2	669.838	#N/A	21.66	2443494	#N/A	2443494	5624	#N/A	5624	#N/A	0.104854	Biognosys standards			FALSE
20221007_MS_MRMhr_DC24_VACV_65C_r1.wiff	65C_r1	TPVISGGPYEYR	12	C61H91N15O19	TPVISGGPYEYR	TPVISGGPYEYR	TPVISGGPYEYR	TPVISGGPYEYR	0.9839	#N/A	#N/A	22.03+/-2.44	#N/A	1337.66	2	669.838	#N/A	21.66	2176833	#N/A	2176833	16392	#N/A	16392	#N/A	âˆž	Biognosys standards			FALSE
20221007_MS_MRMhr_DC24_VACV_65C_r2.wiff	65C_r2	TPVISGGPYEYR	12	C61H91N15O19	TPVISGGPYEYR	TPVISGGPYEYR	TPVISGGPYEYR	TPVISGGPYEYR	0.9857	#N/A	#N/A	22.03+/-2.44	#N/A	1337.66	2	669.838	#N/A	21.66	2350687	#N/A	2350687	26974	#N/A	26974	#N/A	âˆž	Biognosys standards			FALSE
20221007_MS_MRMhr_DC24_VACV_65C_r3.wiff	65C_r3	TPVISGGPYEYR	12	C61H91N15O19	TPVISGGPYEYR	TPVISGGPYEYR	TPVISGGPYEYR	TPVISGGPYEYR	0	#N/A	#N/A	22.03+/-2.44	#N/A	1337.66	2	669.838	#N/A	21.66	0	#N/A	0	0	#N/A	0	#N/A	0	Biognosys standards			FALSE
20221007_MS_MRMhr_DC24_VACV_69C_r1.wiff	69C_r1	TPVISGGPYEYR	12	C61H91N15O19	TPVISGGPYEYR	TPVISGGPYEYR	TPVISGGPYEYR	TPVISGGPYEYR	0.9858	#N/A	#N/A	22.03+/-2.44	#N/A	1337.66	2	669.838	#N/A	21.66	2129260	#N/A	2129260	1534	#N/A	1534	#N/A	âˆž	Biognosys standards			FALSE
20221007_MS_MRMhr_DC24_VACV_69C_r2.wiff	69C_r2	TPVISGGPYEYR	12	C61H91N15O19	TPVISGGPYEYR	TPVISGGPYEYR	TPVISGGPYEYR	TPVISGGPYEYR	0.9758	#N/A	#N/A	22.03+/-2.44	#N/A	1337.66	2	669.838	#N/A	21.66	2093478	#N/A	2093478	6014	#N/A	6014	#N/A	âˆž	Biognosys standards			FALSE
20221007_MS_MRMhr_DC24_VACV_69C_r3.wiff	69C_r3	TPVISGGPYEYR	12	C61H91N15O19	TPVISGGPYEYR	TPVISGGPYEYR	TPVISGGPYEYR	TPVISGGPYEYR	0.9929	#N/A	#N/A	22.03+/-2.44	#N/A	1337.66	2	669.838	#N/A	21.66	2353286	#N/A	2353286	11491	#N/A	11491	#N/A	âˆž	Biognosys standards			FALSE
20221007_MS_MRMhr_DC24_VACV_73C_r1.wiff	73C_r1	TPVISGGPYEYR	12	C61H91N15O19	TPVISGGPYEYR	TPVISGGPYEYR	TPVISGGPYEYR	TPVISGGPYEYR	0.9844	#N/A	#N/A	22.03+/-2.44	#N/A	1337.66	2	669.838	#N/A	21.66	2027666	#N/A	2027666	13860	#N/A	13860	#N/A	âˆž	Biognosys standards			FALSE
20221007_MS_MRMhr_DC24_VACV_73C_r2.wiff	73C_r2	TPVISGGPYEYR	12	C61H91N15O19	TPVISGGPYEYR	TPVISGGPYEYR	TPVISGGPYEYR	TPVISGGPYEYR	0.9931	#N/A	#N/A	22.03+/-2.44	#N/A	1337.66	2	669.838	#N/A	21.66	2060182	#N/A	2060182	22358	#N/A	22358	#N/A	âˆž	Biognosys standards			FALSE
20221007_MS_MRMhr_DC24_VACV_73C_r3.wiff	73C_r3	TPVISGGPYEYR	12	C61H91N15O19	TPVISGGPYEYR	TPVISGGPYEYR	TPVISGGPYEYR	TPVISGGPYEYR	0.983	#N/A	#N/A	22.03+/-2.44	#N/A	1337.66	2	669.838	#N/A	21.66	2252981	#N/A	2252981	23679	#N/A	23679	#N/A	âˆž	Biognosys standards			FALSE
20221010_MS_zenoSWATH_DC24_VACV_37C_r1.wiff	SWATH_r1	TPVITGAPYEYR	12	C63H95N15O19	TPVITGAPYEYR	TPVITGAPYEYR	TPVITGAPYEYR	TPVITGAPYEYR	0.9614	#N/A	#N/A	23.04+/-0.87	#N/A	1365.69	2	683.854	#N/A	22.94	5268031	#N/A	5268031	40180	#N/A	40180	#N/A	0.038385	Biognosys standards			FALSE
20221010_MS_zenoSWATH_DC24_VACV_37C_r2.wiff	SWATH_r2	TPVITGAPYEYR	12	C63H95N15O19	TPVITGAPYEYR	TPVITGAPYEYR	TPVITGAPYEYR	TPVITGAPYEYR	0.9645	#N/A	#N/A	23.04+/-0.87	#N/A	1365.69	2	683.854	#N/A	22.94	3843244	#N/A	3843244	34387	#N/A	34387	#N/A	0.039821	Biognosys standards			FALSE
20221010_MS_zenoSWATH_DC24_VACV_37C_r3.wiff	SWATH_r3	TPVITGAPYEYR	12	C63H95N15O19	TPVITGAPYEYR	TPVITGAPYEYR	TPVITGAPYEYR	TPVITGAPYEYR	0.9658	#N/A	#N/A	23.04+/-0.87	#N/A	1365.69	2	683.854	#N/A	22.94	4538368	#N/A	4538368	70366	#N/A	70366	#N/A	0.039758	Biognosys standards			FALSE
20221007_MS_MRMhr_DC24_VACV_37C_r1.wiff	37C_r1	TPVITGAPYEYR	12	C63H95N15O19	TPVITGAPYEYR	TPVITGAPYEYR	TPVITGAPYEYR	TPVITGAPYEYR	0.9928	#N/A	#N/A	23.04+/-0.87	#N/A	1365.69	2	683.854	#N/A	22.94	3259358	#N/A	3259358	15131	#N/A	15131	#N/A	0.027516	Biognosys standards			FALSE
20221007_MS_MRMhr_DC24_VACV_37C_r2.wiff	37C_r2	TPVITGAPYEYR	12	C63H95N15O19	TPVITGAPYEYR	TPVITGAPYEYR	TPVITGAPYEYR	TPVITGAPYEYR	0.9712	#N/A	#N/A	23.04+/-0.87	#N/A	1365.69	2	683.854	#N/A	22.94	3536296	#N/A	3536296	26034	#N/A	26034	#N/A	0.029533	Biognosys standards			FALSE
20221007_MS_MRMhr_DC24_VACV_37C_r3.wiff	37C_r3	TPVITGAPYEYR	12	C63H95N15O19	TPVITGAPYEYR	TPVITGAPYEYR	TPVITGAPYEYR	TPVITGAPYEYR	0.964	#N/A	#N/A	23.04+/-0.87	#N/A	1365.69	2	683.854	#N/A	22.94	3009844	#N/A	3009844	12330	#N/A	12330	#N/A	0.030177	Biognosys standards			FALSE
20221007_MS_MRMhr_DC24_VACV_41C_r1.wiff	41C_r1	TPVITGAPYEYR	12	C63H95N15O19	TPVITGAPYEYR	TPVITGAPYEYR	TPVITGAPYEYR	TPVITGAPYEYR	0.9754	#N/A	#N/A	23.04+/-0.87	#N/A	1365.69	2	683.854	#N/A	22.94	2698931	#N/A	2698931	3152	#N/A	3152	#N/A	0.038034	Biognosys standards			FALSE
20221007_MS_MRMhr_DC24_VACV_41C_r2.wiff	41C_r2	TPVITGAPYEYR	12	C63H95N15O19	TPVITGAPYEYR	TPVITGAPYEYR	TPVITGAPYEYR	TPVITGAPYEYR	0.9871	#N/A	#N/A	23.04+/-0.87	#N/A	1365.69	2	683.854	#N/A	22.94	2952516	#N/A	2952516	0	#N/A	0	#N/A	0.026034	Biognosys standards			FALSE
20221007_MS_MRMhr_DC24_VACV_41C_r3.wiff	41C_r3	TPVITGAPYEYR	12	C63H95N15O19	TPVITGAPYEYR	TPVITGAPYEYR	TPVITGAPYEYR	TPVITGAPYEYR	0.9721	#N/A	#N/A	23.04+/-0.87	#N/A	1365.69	2	683.854	#N/A	22.94	3219610	#N/A	3219610	18518	#N/A	18518	#N/A	0.024984	Biognosys standards			FALSE
20221007_MS_MRMhr_DC24_VACV_45C_r1.wiff	45C_r1	TPVITGAPYEYR	12	C63H95N15O19	TPVITGAPYEYR	TPVITGAPYEYR	TPVITGAPYEYR	TPVITGAPYEYR	0.9713	#N/A	#N/A	23.04+/-0.87	#N/A	1365.69	2	683.854	#N/A	22.94	3037475	#N/A	3037475	12960	#N/A	12960	#N/A	0.031701	Biognosys standards			FALSE
20221007_MS_MRMhr_DC24_VACV_45C_r2.wiff	45C_r2	TPVITGAPYEYR	12	C63H95N15O19	TPVITGAPYEYR	TPVITGAPYEYR	TPVITGAPYEYR	TPVITGAPYEYR	0.98	#N/A	#N/A	23.04+/-0.87	#N/A	1365.69	2	683.854	#N/A	22.94	2996138	#N/A	2996138	0	#N/A	0	#N/A	0.029347	Biognosys standards			FALSE
20221007_MS_MRMhr_DC24_VACV_45C_r3.wiff	45C_r3	TPVITGAPYEYR	12	C63H95N15O19	TPVITGAPYEYR	TPVITGAPYEYR	TPVITGAPYEYR	TPVITGAPYEYR	0.9756	#N/A	#N/A	23.04+/-0.87	#N/A	1365.69	2	683.854	#N/A	22.94	3219023	#N/A	3219023	6217	#N/A	6217	#N/A	0.029181	Biognosys standards			FALSE
20221007_MS_MRMhr_DC24_VACV_49C_r1.wiff	49C_r1	TPVITGAPYEYR	12	C63H95N15O19	TPVITGAPYEYR	TPVITGAPYEYR	TPVITGAPYEYR	TPVITGAPYEYR	0.9815	#N/A	#N/A	23.04+/-0.87	#N/A	1365.69	2	683.854	#N/A	22.94	2932351	#N/A	2932351	13635	#N/A	13635	#N/A	0.04868	Biognosys standards			FALSE
20221007_MS_MRMhr_DC24_VACV_49C_r2.wiff	49C_r2	TPVITGAPYEYR	12	C63H95N15O19	TPVITGAPYEYR	TPVITGAPYEYR	TPVITGAPYEYR	TPVITGAPYEYR	0.976	#N/A	#N/A	23.04+/-0.87	#N/A	1365.69	2	683.854	#N/A	22.94	2839657	#N/A	2839657	3343	#N/A	3343	#N/A	0.036857	Biognosys standards			FALSE
20221007_MS_MRMhr_DC24_VACV_49C_r3.wiff	49C_r3	TPVITGAPYEYR	12	C63H95N15O19	TPVITGAPYEYR	TPVITGAPYEYR	TPVITGAPYEYR	TPVITGAPYEYR	0.9705	#N/A	#N/A	23.04+/-0.87	#N/A	1365.69	2	683.854	#N/A	22.94	2814851	#N/A	2814851	0	#N/A	0	#N/A	0.045532	Biognosys standards			FALSE
20221007_MS_MRMhr_DC24_VACV_53C_r1.wiff	53C_r1	TPVITGAPYEYR	12	C63H95N15O19	TPVITGAPYEYR	TPVITGAPYEYR	TPVITGAPYEYR	TPVITGAPYEYR	0.9858	#N/A	#N/A	23.04+/-0.87	#N/A	1365.69	2	683.854	#N/A	22.94	2972429	#N/A	2972429	16214	#N/A	16214	#N/A	0.049993	Biognosys standards			FALSE
20221007_MS_MRMhr_DC24_VACV_53C_r2.wiff	53C_r2	TPVITGAPYEYR	12	C63H95N15O19	TPVITGAPYEYR	TPVITGAPYEYR	TPVITGAPYEYR	TPVITGAPYEYR	0.9732	#N/A	#N/A	23.04+/-0.87	#N/A	1365.69	2	683.854	#N/A	22.94	3136373	#N/A	3136373	16253	#N/A	16253	#N/A	0.073248	Biognosys standards			FALSE
20221007_MS_MRMhr_DC24_VACV_53C_r3.wiff	53C_r3	TPVITGAPYEYR	12	C63H95N15O19	TPVITGAPYEYR	TPVITGAPYEYR	TPVITGAPYEYR	TPVITGAPYEYR	0.9852	#N/A	#N/A	23.04+/-0.87	#N/A	1365.69	2	683.854	#N/A	22.94	3239358	#N/A	3239358	0	#N/A	0	#N/A	0.05898	Biognosys standards			FALSE
20221007_MS_MRMhr_DC24_VACV_57C_r1.wiff	57C_r1	TPVITGAPYEYR	12	C63H95N15O19	TPVITGAPYEYR	TPVITGAPYEYR	TPVITGAPYEYR	TPVITGAPYEYR	0.9721	#N/A	#N/A	23.04+/-0.87	#N/A	1365.69	2	683.854	#N/A	22.94	2883023	#N/A	2883023	15296	#N/A	15296	#N/A	0.087203	Biognosys standards			FALSE
20221007_MS_MRMhr_DC24_VACV_57C_r2.wiff	57C_r2	TPVITGAPYEYR	12	C63H95N15O19	TPVITGAPYEYR	TPVITGAPYEYR	TPVITGAPYEYR	TPVITGAPYEYR	0.9673	#N/A	#N/A	23.04+/-0.87	#N/A	1365.69	2	683.854	#N/A	22.94	3065009	#N/A	3065009	12023	#N/A	12023	#N/A	0.099054	Biognosys standards			FALSE
20221007_MS_MRMhr_DC24_VACV_57C_r3.wiff	57C_r3	TPVITGAPYEYR	12	C63H95N15O19	TPVITGAPYEYR	TPVITGAPYEYR	TPVITGAPYEYR	TPVITGAPYEYR	0.9727	#N/A	#N/A	23.04+/-0.87	#N/A	1365.69	2	683.854	#N/A	22.94	3260025	#N/A	3260025	6139	#N/A	6139	#N/A	0.123503	Biognosys standards			FALSE
20221007_MS_MRMhr_DC24_VACV_61C_r1.wiff	61C_r1	TPVITGAPYEYR	12	C63H95N15O19	TPVITGAPYEYR	TPVITGAPYEYR	TPVITGAPYEYR	TPVITGAPYEYR	0.983	#N/A	#N/A	23.04+/-0.87	#N/A	1365.69	2	683.854	#N/A	22.94	3053809	#N/A	3053809	27416	#N/A	27416	#N/A	0.143955	Biognosys standards			FALSE
20221007_MS_MRMhr_DC24_VACV_61C_r2.wiff	61C_r2	TPVITGAPYEYR	12	C63H95N15O19	TPVITGAPYEYR	TPVITGAPYEYR	TPVITGAPYEYR	TPVITGAPYEYR	0.9832	#N/A	#N/A	23.04+/-0.87	#N/A	1365.69	2	683.854	#N/A	22.94	3135864	#N/A	3135864	16852	#N/A	16852	#N/A	0.150334	Biognosys standards			FALSE
20221007_MS_MRMhr_DC24_VACV_61C_r3.wiff	61C_r3	TPVITGAPYEYR	12	C63H95N15O19	TPVITGAPYEYR	TPVITGAPYEYR	TPVITGAPYEYR	TPVITGAPYEYR	0.9826	#N/A	#N/A	23.04+/-0.87	#N/A	1365.69	2	683.854	#N/A	22.94	3523580	#N/A	3523580	12161	#N/A	12161	#N/A	0.151202	Biognosys standards			FALSE
20221007_MS_MRMhr_DC24_VACV_65C_r1.wiff	65C_r1	TPVITGAPYEYR	12	C63H95N15O19	TPVITGAPYEYR	TPVITGAPYEYR	TPVITGAPYEYR	TPVITGAPYEYR	0.9811	#N/A	#N/A	23.04+/-0.87	#N/A	1365.69	2	683.854	#N/A	22.94	2757273	#N/A	2757273	8005	#N/A	8005	#N/A	âˆž	Biognosys standards			FALSE
20221007_MS_MRMhr_DC24_VACV_65C_r2.wiff	65C_r2	TPVITGAPYEYR	12	C63H95N15O19	TPVITGAPYEYR	TPVITGAPYEYR	TPVITGAPYEYR	TPVITGAPYEYR	0.9887	#N/A	#N/A	23.04+/-0.87	#N/A	1365.69	2	683.854	#N/A	22.94	3102205	#N/A	3102205	0	#N/A	0	#N/A	âˆž	Biognosys standards			FALSE
20221007_MS_MRMhr_DC24_VACV_65C_r3.wiff	65C_r3	TPVITGAPYEYR	12	C63H95N15O19	TPVITGAPYEYR	TPVITGAPYEYR	TPVITGAPYEYR	TPVITGAPYEYR	0	#N/A	#N/A	23.04+/-0.87	#N/A	1365.69	2	683.854	#N/A	22.94	0	#N/A	0	0	#N/A	0	#N/A	0	Biognosys standards			FALSE
20221007_MS_MRMhr_DC24_VACV_69C_r1.wiff	69C_r1	TPVITGAPYEYR	12	C63H95N15O19	TPVITGAPYEYR	TPVITGAPYEYR	TPVITGAPYEYR	TPVITGAPYEYR	0.9861	#N/A	#N/A	23.04+/-0.87	#N/A	1365.69	2	683.854	#N/A	22.94	2596883	#N/A	2596883	13353	#N/A	13353	#N/A	âˆž	Biognosys standards			FALSE
20221007_MS_MRMhr_DC24_VACV_69C_r2.wiff	69C_r2	TPVITGAPYEYR	12	C63H95N15O19	TPVITGAPYEYR	TPVITGAPYEYR	TPVITGAPYEYR	TPVITGAPYEYR	0.9701	#N/A	#N/A	23.04+/-0.87	#N/A	1365.69	2	683.854	#N/A	22.94	2834467	#N/A	2834467	31841	#N/A	31841	#N/A	âˆž	Biognosys standards			FALSE
20221007_MS_MRMhr_DC24_VACV_69C_r3.wiff	69C_r3	TPVITGAPYEYR	12	C63H95N15O19	TPVITGAPYEYR	TPVITGAPYEYR	TPVITGAPYEYR	TPVITGAPYEYR	0.9732	#N/A	#N/A	23.04+/-0.87	#N/A	1365.69	2	683.854	#N/A	22.94	3192330	#N/A	3192330	7762	#N/A	7762	#N/A	âˆž	Biognosys standards			FALSE
20221007_MS_MRMhr_DC24_VACV_73C_r1.wiff	73C_r1	TPVITGAPYEYR	12	C63H95N15O19	TPVITGAPYEYR	TPVITGAPYEYR	TPVITGAPYEYR	TPVITGAPYEYR	0.9776	#N/A	#N/A	23.04+/-0.87	#N/A	1365.69	2	683.854	#N/A	22.94	2827981	#N/A	2827981	2239	#N/A	2239	#N/A	âˆž	Biognosys standards			FALSE
20221007_MS_MRMhr_DC24_VACV_73C_r2.wiff	73C_r2	TPVITGAPYEYR	12	C63H95N15O19	TPVITGAPYEYR	TPVITGAPYEYR	TPVITGAPYEYR	TPVITGAPYEYR	0.9789	#N/A	#N/A	23.04+/-0.87	#N/A	1365.69	2	683.854	#N/A	22.94	2735334	#N/A	2735334	17954	#N/A	17954	#N/A	âˆž	Biognosys standards			FALSE
20221007_MS_MRMhr_DC24_VACV_73C_r3.wiff	73C_r3	TPVITGAPYEYR	12	C63H95N15O19	TPVITGAPYEYR	TPVITGAPYEYR	TPVITGAPYEYR	TPVITGAPYEYR	0.964	#N/A	#N/A	23.04+/-0.87	#N/A	1365.69	2	683.854	#N/A	22.94	2921763	#N/A	2921763	0	#N/A	0	#N/A	âˆž	Biognosys standards			FALSE
20221010_MS_zenoSWATH_DC24_VACV_37C_r1.wiff	SWATH_r1	DGLDAASYYAPVR	13	C62H92N16O21	DGLDAASYYAPVR	DGLDAASYYAPVR	DGLDAASYYAPVR	DGLDAASYYAPVR	0.9869	#N/A	#N/A	25.71+/-0.03	#N/A	1396.66	2	699.338	#N/A	25.73	3166680	#N/A	3166680	44466	#N/A	44466	#N/A	0.023074	Biognosys standards			FALSE
20221010_MS_zenoSWATH_DC24_VACV_37C_r2.wiff	SWATH_r2	DGLDAASYYAPVR	13	C62H92N16O21	DGLDAASYYAPVR	DGLDAASYYAPVR	DGLDAASYYAPVR	DGLDAASYYAPVR	0.9856	#N/A	#N/A	25.71+/-0.03	#N/A	1396.66	2	699.338	#N/A	25.73	2114576	#N/A	2114576	14437	#N/A	14437	#N/A	0.02191	Biognosys standards			FALSE
20221010_MS_zenoSWATH_DC24_VACV_37C_r3.wiff	SWATH_r3	DGLDAASYYAPVR	13	C62H92N16O21	DGLDAASYYAPVR	DGLDAASYYAPVR	DGLDAASYYAPVR	DGLDAASYYAPVR	0.9826	#N/A	#N/A	25.71+/-0.03	#N/A	1396.66	2	699.338	#N/A	25.73	2596344	#N/A	2596344	5131	#N/A	5131	#N/A	0.022745	Biognosys standards			FALSE
20221010_MS_zenoSWATH_DC24_VACV_37C_r1.wiff	SWATH_r1	ADVTPADFSEWSK	13	C65H93N15O23	ADVTPADFSEWSK	ADVTPADFSEWSK	ADVTPADFSEWSK	ADVTPADFSEWSK	0.963	#N/A	#N/A	27.79+/-0.02	#N/A	1451.66	2	726.836	#N/A	27.83	730775	#N/A	730775	8906	#N/A	8906	#N/A	0.005325	Biognosys standards			FALSE
20221010_MS_zenoSWATH_DC24_VACV_37C_r2.wiff	SWATH_r2	ADVTPADFSEWSK	13	C65H93N15O23	ADVTPADFSEWSK	ADVTPADFSEWSK	ADVTPADFSEWSK	ADVTPADFSEWSK	0.9649	#N/A	#N/A	27.79+/-0.02	#N/A	1451.66	2	726.836	#N/A	27.83	1507382	#N/A	1507382	24842	#N/A	24842	#N/A	0.015618	Biognosys standards			FALSE
20221010_MS_zenoSWATH_DC24_VACV_37C_r3.wiff	SWATH_r3	ADVTPADFSEWSK	13	C65H93N15O23	ADVTPADFSEWSK	ADVTPADFSEWSK	ADVTPADFSEWSK	ADVTPADFSEWSK	0.9652	#N/A	#N/A	27.79+/-0.02	#N/A	1451.66	2	726.836	#N/A	27.83	793589	#N/A	793589	18014	#N/A	18014	#N/A	0.006952	Biognosys standards			FALSE
20221010_MS_zenoSWATH_DC24_VACV_37C_r1.wiff	SWATH_r1	GTFIIDPGGVIR	12	C57H93N15O16	GTFIIDPGGVIR	GTFIIDPGGVIR	GTFIIDPGGVIR	GTFIIDPGGVIR	0.9822	#N/A	#N/A	32.53+/-0.04	#N/A	1243.69	2	622.854	#N/A	32.53	7465482	#N/A	7465482	41295	#N/A	41295	#N/A	0.054396	Biognosys standards			FALSE
20221010_MS_zenoSWATH_DC24_VACV_37C_r2.wiff	SWATH_r2	GTFIIDPGGVIR	12	C57H93N15O16	GTFIIDPGGVIR	GTFIIDPGGVIR	GTFIIDPGGVIR	GTFIIDPGGVIR	0.974	#N/A	#N/A	32.53+/-0.04	#N/A	1243.69	2	622.854	#N/A	32.53	5633044	#N/A	5633044	66394	#N/A	66394	#N/A	0.058366	Biognosys standards			FALSE
20221010_MS_zenoSWATH_DC24_VACV_37C_r3.wiff	SWATH_r3	GTFIIDPGGVIR	12	C57H93N15O16	GTFIIDPGGVIR	GTFIIDPGGVIR	GTFIIDPGGVIR	GTFIIDPGGVIR	0.9777	#N/A	#N/A	32.53+/-0.04	#N/A	1243.69	2	622.854	#N/A	32.53	7001566	#N/A	7001566	48622	#N/A	48622	#N/A	0.061337	Biognosys standards			FALSE
20221010_MS_zenoSWATH_DC24_VACV_37C_r1.wiff	SWATH_r1	GTFIIDPAAVIR	12	C59H97N15O16	GTFIIDPAAVIR	GTFIIDPAAVIR	GTFIIDPAAVIR	GTFIIDPAAVIR	0.9801	#N/A	#N/A	36.28+/-0.63	#N/A	1271.72	2	636.869	#N/A	36.4	6859186	#N/A	6859186	41944	#N/A	41944	#N/A	0.049978	Biognosys standards			FALSE
20221010_MS_zenoSWATH_DC24_VACV_37C_r2.wiff	SWATH_r2	GTFIIDPAAVIR	12	C59H97N15O16	GTFIIDPAAVIR	GTFIIDPAAVIR	GTFIIDPAAVIR	GTFIIDPAAVIR	0.9781	#N/A	#N/A	36.28+/-0.63	#N/A	1271.72	2	636.869	#N/A	36.4	4974856	#N/A	4974856	49557	#N/A	49557	#N/A	0.051546	Biognosys standards			FALSE
20221010_MS_zenoSWATH_DC24_VACV_37C_r3.wiff	SWATH_r3	GTFIIDPAAVIR	12	C59H97N15O16	GTFIIDPAAVIR	GTFIIDPAAVIR	GTFIIDPAAVIR	GTFIIDPAAVIR	0.9778	#N/A	#N/A	36.28+/-0.63	#N/A	1271.72	2	636.869	#N/A	36.4	6459119	#N/A	6459119	48124	#N/A	48124	#N/A	0.056585	Biognosys standards			FALSE
20221007_MS_MRMhr_DC24_VACV_37C_r1.wiff	37C_r1	GTFIIDPAAVIR	12	C59H97N15O16	GTFIIDPAAVIR	GTFIIDPAAVIR	GTFIIDPAAVIR	GTFIIDPAAVIR	0.9904	#N/A	#N/A	36.28+/-0.63	#N/A	1271.72	2	636.869	#N/A	36.4	4789858	#N/A	4789858	11109	#N/A	11109	#N/A	0.040437	Biognosys standards			FALSE
20221007_MS_MRMhr_DC24_VACV_37C_r2.wiff	37C_r2	GTFIIDPAAVIR	12	C59H97N15O16	GTFIIDPAAVIR	GTFIIDPAAVIR	GTFIIDPAAVIR	GTFIIDPAAVIR	0.9935	#N/A	#N/A	36.28+/-0.63	#N/A	1271.72	2	636.869	#N/A	36.4	4653603	#N/A	4653603	47488	#N/A	47488	#N/A	0.038864	Biognosys standards			FALSE
20221007_MS_MRMhr_DC24_VACV_37C_r3.wiff	37C_r3	GTFIIDPAAVIR	12	C59H97N15O16	GTFIIDPAAVIR	GTFIIDPAAVIR	GTFIIDPAAVIR	GTFIIDPAAVIR	0.9922	#N/A	#N/A	36.28+/-0.63	#N/A	1271.72	2	636.869	#N/A	36.4	4614030	#N/A	4614030	80693	#N/A	80693	#N/A	0.046261	Biognosys standards			FALSE
20221007_MS_MRMhr_DC24_VACV_41C_r1.wiff	41C_r1	GTFIIDPAAVIR	12	C59H97N15O16	GTFIIDPAAVIR	GTFIIDPAAVIR	GTFIIDPAAVIR	GTFIIDPAAVIR	0.9872	#N/A	#N/A	36.28+/-0.63	#N/A	1271.72	2	636.869	#N/A	36.4	3730011	#N/A	3730011	14822	#N/A	14822	#N/A	0.052564	Biognosys standards			FALSE
20221007_MS_MRMhr_DC24_VACV_41C_r2.wiff	41C_r2	GTFIIDPAAVIR	12	C59H97N15O16	GTFIIDPAAVIR	GTFIIDPAAVIR	GTFIIDPAAVIR	GTFIIDPAAVIR	0.986	#N/A	#N/A	36.28+/-0.63	#N/A	1271.72	2	636.869	#N/A	36.4	4617943	#N/A	4617943	25772	#N/A	25772	#N/A	0.04072	Biognosys standards			FALSE
20221007_MS_MRMhr_DC24_VACV_41C_r3.wiff	41C_r3	GTFIIDPAAVIR	12	C59H97N15O16	GTFIIDPAAVIR	GTFIIDPAAVIR	GTFIIDPAAVIR	GTFIIDPAAVIR	0.9859	#N/A	#N/A	36.28+/-0.63	#N/A	1271.72	2	636.869	#N/A	36.4	5068953	#N/A	5068953	15404	#N/A	15404	#N/A	0.039335	Biognosys standards			FALSE
20221007_MS_MRMhr_DC24_VACV_45C_r1.wiff	45C_r1	GTFIIDPAAVIR	12	C59H97N15O16	GTFIIDPAAVIR	GTFIIDPAAVIR	GTFIIDPAAVIR	GTFIIDPAAVIR	0.9858	#N/A	#N/A	36.28+/-0.63	#N/A	1271.72	2	636.869	#N/A	36.4	4813189	#N/A	4813189	28524	#N/A	28524	#N/A	0.050233	Biognosys standards			FALSE
20221007_MS_MRMhr_DC24_VACV_45C_r2.wiff	45C_r2	GTFIIDPAAVIR	12	C59H97N15O16	GTFIIDPAAVIR	GTFIIDPAAVIR	GTFIIDPAAVIR	GTFIIDPAAVIR	0.9858	#N/A	#N/A	36.28+/-0.63	#N/A	1271.72	2	636.869	#N/A	36.4	4324813	#N/A	4324813	35700	#N/A	35700	#N/A	0.042361	Biognosys standards			FALSE
20221007_MS_MRMhr_DC24_VACV_45C_r3.wiff	45C_r3	GTFIIDPAAVIR	12	C59H97N15O16	GTFIIDPAAVIR	GTFIIDPAAVIR	GTFIIDPAAVIR	GTFIIDPAAVIR	0.987	#N/A	#N/A	36.28+/-0.63	#N/A	1271.72	2	636.869	#N/A	36.4	4697659	#N/A	4697659	29332	#N/A	29332	#N/A	0.042585	Biognosys standards			FALSE
20221007_MS_MRMhr_DC24_VACV_49C_r1.wiff	49C_r1	GTFIIDPAAVIR	12	C59H97N15O16	GTFIIDPAAVIR	GTFIIDPAAVIR	GTFIIDPAAVIR	GTFIIDPAAVIR	0.9899	#N/A	#N/A	36.28+/-0.63	#N/A	1271.72	2	636.869	#N/A	36.4	4047169	#N/A	4047169	20671	#N/A	20671	#N/A	0.067187	Biognosys standards			FALSE
20221007_MS_MRMhr_DC24_VACV_49C_r2.wiff	49C_r2	GTFIIDPAAVIR	12	C59H97N15O16	GTFIIDPAAVIR	GTFIIDPAAVIR	GTFIIDPAAVIR	GTFIIDPAAVIR	0.9838	#N/A	#N/A	36.28+/-0.63	#N/A	1271.72	2	636.869	#N/A	36.4	4204467	#N/A	4204467	12541	#N/A	12541	#N/A	0.054571	Biognosys standards			FALSE
20221007_MS_MRMhr_DC24_VACV_49C_r3.wiff	49C_r3	GTFIIDPAAVIR	12	C59H97N15O16	GTFIIDPAAVIR	GTFIIDPAAVIR	GTFIIDPAAVIR	GTFIIDPAAVIR	0.9843	#N/A	#N/A	36.28+/-0.63	#N/A	1271.72	2	636.869	#N/A	36.4	3670124	#N/A	3670124	47361	#N/A	47361	#N/A	0.059367	Biognosys standards			FALSE
20221007_MS_MRMhr_DC24_VACV_53C_r1.wiff	53C_r1	GTFIIDPAAVIR	12	C59H97N15O16	GTFIIDPAAVIR	GTFIIDPAAVIR	GTFIIDPAAVIR	GTFIIDPAAVIR	0.9763	#N/A	#N/A	36.28+/-0.63	#N/A	1271.72	2	636.869	#N/A	36.4	3687696	#N/A	3687696	3120	#N/A	3120	#N/A	0.062023	Biognosys standards			FALSE
20221007_MS_MRMhr_DC24_VACV_53C_r2.wiff	53C_r2	GTFIIDPAAVIR	12	C59H97N15O16	GTFIIDPAAVIR	GTFIIDPAAVIR	GTFIIDPAAVIR	GTFIIDPAAVIR	0.9889	#N/A	#N/A	36.28+/-0.63	#N/A	1271.72	2	636.869	#N/A	36.4	3464577	#N/A	3464577	119	#N/A	119	#N/A	0.080913	Biognosys standards			FALSE
20221007_MS_MRMhr_DC24_VACV_53C_r3.wiff	53C_r3	GTFIIDPAAVIR	12	C59H97N15O16	GTFIIDPAAVIR	GTFIIDPAAVIR	GTFIIDPAAVIR	GTFIIDPAAVIR	0.9814	#N/A	#N/A	36.28+/-0.63	#N/A	1271.72	2	636.869	#N/A	36.4	4545883	#N/A	4545883	34709	#N/A	34709	#N/A	0.082769	Biognosys standards			FALSE
20221007_MS_MRMhr_DC24_VACV_57C_r1.wiff	57C_r1	GTFIIDPAAVIR	12	C59H97N15O16	GTFIIDPAAVIR	GTFIIDPAAVIR	GTFIIDPAAVIR	GTFIIDPAAVIR	0.9874	#N/A	#N/A	36.28+/-0.63	#N/A	1271.72	2	636.869	#N/A	36.4	4179090	#N/A	4179090	18685	#N/A	18685	#N/A	0.126406	Biognosys standards			FALSE
20221007_MS_MRMhr_DC24_VACV_57C_r2.wiff	57C_r2	GTFIIDPAAVIR	12	C59H97N15O16	GTFIIDPAAVIR	GTFIIDPAAVIR	GTFIIDPAAVIR	GTFIIDPAAVIR	0.9523	#N/A	#N/A	36.28+/-0.63	#N/A	1271.72	2	636.869	#N/A	36.4	3969127	#N/A	3969127	8534	#N/A	8534	#N/A	0.128273	Biognosys standards			FALSE
20221007_MS_MRMhr_DC24_VACV_57C_r3.wiff	57C_r3	GTFIIDPAAVIR	12	C59H97N15O16	GTFIIDPAAVIR	GTFIIDPAAVIR	GTFIIDPAAVIR	GTFIIDPAAVIR	0.9908	#N/A	#N/A	36.28+/-0.63	#N/A	1271.72	2	636.869	#N/A	36.4	4431297	#N/A	4431297	10684	#N/A	10684	#N/A	0.167875	Biognosys standards			FALSE
20221007_MS_MRMhr_DC24_VACV_61C_r1.wiff	61C_r1	GTFIIDPAAVIR	12	C59H97N15O16	GTFIIDPAAVIR	GTFIIDPAAVIR	GTFIIDPAAVIR	GTFIIDPAAVIR	0.982	#N/A	#N/A	36.28+/-0.63	#N/A	1271.72	2	636.869	#N/A	36.4	4323026	#N/A	4323026	1354	#N/A	1354	#N/A	0.203786	Biognosys standards			FALSE
20221007_MS_MRMhr_DC24_VACV_61C_r2.wiff	61C_r2	GTFIIDPAAVIR	12	C59H97N15O16	GTFIIDPAAVIR	GTFIIDPAAVIR	GTFIIDPAAVIR	GTFIIDPAAVIR	0.9794	#N/A	#N/A	36.28+/-0.63	#N/A	1271.72	2	636.869	#N/A	36.4	4428157	#N/A	4428157	9267	#N/A	9267	#N/A	0.212286	Biognosys standards			FALSE
20221007_MS_MRMhr_DC24_VACV_61C_r3.wiff	61C_r3	GTFIIDPAAVIR	12	C59H97N15O16	GTFIIDPAAVIR	GTFIIDPAAVIR	GTFIIDPAAVIR	GTFIIDPAAVIR	0.9823	#N/A	#N/A	36.28+/-0.63	#N/A	1271.72	2	636.869	#N/A	36.4	4316120	#N/A	4316120	29130	#N/A	29130	#N/A	0.185211	Biognosys standards			FALSE
20221007_MS_MRMhr_DC24_VACV_65C_r1.wiff	65C_r1	GTFIIDPAAVIR	12	C59H97N15O16	GTFIIDPAAVIR	GTFIIDPAAVIR	GTFIIDPAAVIR	GTFIIDPAAVIR	0.9812	#N/A	#N/A	36.28+/-0.63	#N/A	1271.72	2	636.869	#N/A	36.4	4016830	#N/A	4016830	0	#N/A	0	#N/A	âˆž	Biognosys standards			FALSE
20221007_MS_MRMhr_DC24_VACV_65C_r2.wiff	65C_r2	GTFIIDPAAVIR	12	C59H97N15O16	GTFIIDPAAVIR	GTFIIDPAAVIR	GTFIIDPAAVIR	GTFIIDPAAVIR	0.9839	#N/A	#N/A	36.28+/-0.63	#N/A	1271.72	2	636.869	#N/A	36.4	4095734	#N/A	4095734	26121	#N/A	26121	#N/A	âˆž	Biognosys standards			FALSE
20221007_MS_MRMhr_DC24_VACV_65C_r3.wiff	65C_r3	GTFIIDPAAVIR	12	C59H97N15O16	GTFIIDPAAVIR	GTFIIDPAAVIR	GTFIIDPAAVIR	GTFIIDPAAVIR	0	#N/A	#N/A	36.28+/-0.63	#N/A	1271.72	2	636.869	#N/A	36.4	0	#N/A	0	0	#N/A	0	#N/A	0	Biognosys standards			FALSE
20221007_MS_MRMhr_DC24_VACV_69C_r1.wiff	69C_r1	GTFIIDPAAVIR	12	C59H97N15O16	GTFIIDPAAVIR	GTFIIDPAAVIR	GTFIIDPAAVIR	GTFIIDPAAVIR	0.9818	#N/A	#N/A	36.28+/-0.63	#N/A	1271.72	2	636.869	#N/A	36.4	4277300	#N/A	4277300	12874	#N/A	12874	#N/A	âˆž	Biognosys standards			FALSE
20221007_MS_MRMhr_DC24_VACV_69C_r2.wiff	69C_r2	GTFIIDPAAVIR	12	C59H97N15O16	GTFIIDPAAVIR	GTFIIDPAAVIR	GTFIIDPAAVIR	GTFIIDPAAVIR	0.9916	#N/A	#N/A	36.28+/-0.63	#N/A	1271.72	2	636.869	#N/A	36.4	4000405	#N/A	4000405	0	#N/A	0	#N/A	âˆž	Biognosys standards			FALSE
20221007_MS_MRMhr_DC24_VACV_69C_r3.wiff	69C_r3	GTFIIDPAAVIR	12	C59H97N15O16	GTFIIDPAAVIR	GTFIIDPAAVIR	GTFIIDPAAVIR	GTFIIDPAAVIR	0.9839	#N/A	#N/A	36.28+/-0.63	#N/A	1271.72	2	636.869	#N/A	36.4	4453478	#N/A	4453478	28680	#N/A	28680	#N/A	âˆž	Biognosys standards			FALSE
20221007_MS_MRMhr_DC24_VACV_73C_r1.wiff	73C_r1	GTFIIDPAAVIR	12	C59H97N15O16	GTFIIDPAAVIR	GTFIIDPAAVIR	GTFIIDPAAVIR	GTFIIDPAAVIR	0.984	#N/A	#N/A	36.28+/-0.63	#N/A	1271.72	2	636.869	#N/A	36.4	4134677	#N/A	4134677	10740	#N/A	10740	#N/A	âˆž	Biognosys standards			FALSE
20221007_MS_MRMhr_DC24_VACV_73C_r2.wiff	73C_r2	GTFIIDPAAVIR	12	C59H97N15O16	GTFIIDPAAVIR	GTFIIDPAAVIR	GTFIIDPAAVIR	GTFIIDPAAVIR	0.975	#N/A	#N/A	36.28+/-0.63	#N/A	1271.72	2	636.869	#N/A	36.4	4159465	#N/A	4159465	4521	#N/A	4521	#N/A	âˆž	Biognosys standards			FALSE
20221007_MS_MRMhr_DC24_VACV_73C_r3.wiff	73C_r3	GTFIIDPAAVIR	12	C59H97N15O16	GTFIIDPAAVIR	GTFIIDPAAVIR	GTFIIDPAAVIR	GTFIIDPAAVIR	0.9715	#N/A	#N/A	36.28+/-0.63	#N/A	1271.72	2	636.869	#N/A	36.4	3868882	#N/A	3868882	14905	#N/A	14905	#N/A	âˆž	Biognosys standards			FALSE
20221010_MS_zenoSWATH_DC24_VACV_37C_r1.wiff	SWATH_r1	LFLQFGAQGSPFLK	14	C76H113N17O18	LFLQFGAQGSPFLK	LFLQFGAQGSPFLK	LFLQFGAQGSPFLK	LFLQFGAQGSPFLK	0.9613	#N/A	#N/A	38.92+/-0.03	#N/A	1551.84	2	776.93	#N/A	38.91	887123	#N/A	887123	2348	#N/A	2348	#N/A	0.006464	Biognosys standards			FALSE
20221010_MS_zenoSWATH_DC24_VACV_37C_r2.wiff	SWATH_r2	LFLQFGAQGSPFLK	14	C76H113N17O18	LFLQFGAQGSPFLK	LFLQFGAQGSPFLK	LFLQFGAQGSPFLK	LFLQFGAQGSPFLK	0.9553	#N/A	#N/A	38.92+/-0.03	#N/A	1551.84	2	776.93	#N/A	38.91	550758	#N/A	550758	3196	#N/A	3196	#N/A	0.005707	Biognosys standards			FALSE
20221010_MS_zenoSWATH_DC24_VACV_37C_r3.wiff	SWATH_r3	LFLQFGAQGSPFLK	14	C76H113N17O18	LFLQFGAQGSPFLK	LFLQFGAQGSPFLK	LFLQFGAQGSPFLK	LFLQFGAQGSPFLK	0.9546	#N/A	#N/A	38.92+/-0.03	#N/A	1551.84	2	776.93	#N/A	38.91	792626	#N/A	792626	1075	#N/A	1075	#N/A	0.006944	Biognosys standards			FALSE
20221010_MS_zenoSWATH_DC24_VACV_37C_r1.wiff	SWATH_r1	TSYKFESV	8	C44H65N9O15	TSYKFESV	TSYKFESV	TSYKFESV	TSYKFESV	0.9773	0.9937	#N/A	18.84+/-0.13	#N/A	959.46	2	480.737	#N/A	18.84	494591	168074	326517	3982	1569	2413	#N/A	0.003604	VACV			FALSE
20221010_MS_zenoSWATH_DC24_VACV_37C_r2.wiff	SWATH_r2	TSYKFESV	8	C44H65N9O15	TSYKFESV	TSYKFESV	TSYKFESV	TSYKFESV	0.9751	0.9906	#N/A	18.84+/-0.13	#N/A	959.46	2	480.737	#N/A	18.84	387653	130725	256928	4309	4309	0	#N/A	0.004017	VACV			FALSE
20221010_MS_zenoSWATH_DC24_VACV_37C_r3.wiff	SWATH_r3	TSYKFESV	8	C44H65N9O15	TSYKFESV	TSYKFESV	TSYKFESV	TSYKFESV	0.986	0.9986	#N/A	18.84+/-0.13	#N/A	959.46	2	480.737	#N/A	18.84	433507	136917	296590	2370	2370	0	#N/A	0.003798	VACV			FALSE
20221007_MS_MRMhr_DC24_VACV_37C_r1.wiff	37C_r1	TSYKFESV	8	C44H65N9O15	TSYKFESV	TSYKFESV	TSYKFESV	TSYKFESV	0.9711	0.9966	#N/A	18.84+/-0.13	#N/A	959.46	2	480.737	#N/A	18.84	596437	247924	348513	979	979	0	#N/A	0.005035	VACV			FALSE
20221007_MS_MRMhr_DC24_VACV_37C_r2.wiff	37C_r2	TSYKFESV	8	C44H65N9O15	TSYKFESV	TSYKFESV	TSYKFESV	TSYKFESV	0.9457	0.9966	#N/A	18.84+/-0.13	#N/A	959.46	2	480.737	#N/A	18.84	358057	282772	75285	4608	4608	0	#N/A	0.00299	VACV			FALSE
20221007_MS_MRMhr_DC24_VACV_37C_r3.wiff	37C_r3	TSYKFESV	8	C44H65N9O15	TSYKFESV	TSYKFESV	TSYKFESV	TSYKFESV	0.9034	0.9972	#N/A	18.84+/-0.13	#N/A	959.46	2	480.737	#N/A	18.84	191503	155292	36211	419	419	0	#N/A	0.00192	VACV			FALSE
20221007_MS_MRMhr_DC24_VACV_41C_r1.wiff	41C_r1	TSYKFESV	8	C44H65N9O15	TSYKFESV	TSYKFESV	TSYKFESV	TSYKFESV	0.9621	0.9956	#N/A	18.84+/-0.13	#N/A	959.46	2	480.737	#N/A	18.84	190880	168518	22362	5529	5529	0	#N/A	0.00269	VACV			FALSE
20221007_MS_MRMhr_DC24_VACV_41C_r2.wiff	41C_r2	TSYKFESV	8	C44H65N9O15	TSYKFESV	TSYKFESV	TSYKFESV	TSYKFESV	0.9153	0.9973	#N/A	18.84+/-0.13	#N/A	959.46	2	480.737	#N/A	18.84	406069	331581	74489	6327	6327	0	#N/A	0.003581	VACV			FALSE
20221007_MS_MRMhr_DC24_VACV_41C_r3.wiff	41C_r3	TSYKFESV	8	C44H65N9O15	TSYKFESV	TSYKFESV	TSYKFESV	TSYKFESV	0.8824	0.998	#N/A	18.84+/-0.13	#N/A	959.46	2	480.737	#N/A	18.84	390895	285885	105010	3242	3242	0	#N/A	0.003033	VACV			FALSE
20221007_MS_MRMhr_DC24_VACV_45C_r1.wiff	45C_r1	TSYKFESV	8	C44H65N9O15	TSYKFESV	TSYKFESV	TSYKFESV	TSYKFESV	0.9796	0.9949	#N/A	18.84+/-0.13	#N/A	959.46	2	480.737	#N/A	18.84	298129	131730	166400	2473	2473	0	#N/A	0.003111	VACV			FALSE
20221007_MS_MRMhr_DC24_VACV_45C_r2.wiff	45C_r2	TSYKFESV	8	C44H65N9O15	TSYKFESV	TSYKFESV	TSYKFESV	TSYKFESV	0.8911	0.9959	#N/A	18.84+/-0.13	#N/A	959.46	2	480.737	#N/A	18.84	248066	210211	37855	2729	2729	0	#N/A	0.00243	VACV			FALSE
20221007_MS_MRMhr_DC24_VACV_45C_r3.wiff	45C_r3	TSYKFESV	8	C44H65N9O15	TSYKFESV	TSYKFESV	TSYKFESV	TSYKFESV	0.8632	0.9978	#N/A	18.84+/-0.13	#N/A	959.46	2	480.737	#N/A	18.84	302951	227666	75285	1168	1168	0	#N/A	0.002746	VACV			FALSE
20221007_MS_MRMhr_DC24_VACV_49C_r1.wiff	49C_r1	TSYKFESV	8	C44H65N9O15	TSYKFESV	TSYKFESV	TSYKFESV	TSYKFESV	0.9235	0.981	#N/A	18.84+/-0.13	#N/A	959.46	2	480.737	#N/A	18.84	162387	68523	93864	2608	2608	0	#N/A	0.002696	VACV			FALSE
20221007_MS_MRMhr_DC24_VACV_49C_r2.wiff	49C_r2	TSYKFESV	8	C44H65N9O15	TSYKFESV	TSYKFESV	TSYKFESV	TSYKFESV	0.9012	0.9979	#N/A	18.84+/-0.13	#N/A	959.46	2	480.737	#N/A	18.84	301030	237698	63332	172	172	0	#N/A	0.003907	VACV			FALSE
20221007_MS_MRMhr_DC24_VACV_49C_r3.wiff	49C_r3	TSYKFESV	8	C44H65N9O15	TSYKFESV	TSYKFESV	TSYKFESV	TSYKFESV	0.8778	0.9907	#N/A	18.84+/-0.13	#N/A	959.46	2	480.737	#N/A	18.84	211379	173754	37625	113	113	0	#N/A	0.003419	VACV			FALSE
20221007_MS_MRMhr_DC24_VACV_53C_r1.wiff	53C_r1	TSYKFESV	8	C44H65N9O15	TSYKFESV	TSYKFESV	TSYKFESV	TSYKFESV	0.9462	0.9799	#N/A	18.84+/-0.13	#N/A	959.46	2	480.737	#N/A	18.84	269805	106286	163519	5283	5283	0	#N/A	0.004538	VACV			FALSE
20221007_MS_MRMhr_DC24_VACV_53C_r2.wiff	53C_r2	TSYKFESV	8	C44H65N9O15	TSYKFESV	TSYKFESV	TSYKFESV	TSYKFESV	0.965	0.9973	#N/A	18.84+/-0.13	#N/A	959.46	2	480.737	#N/A	18.84	557817	225200	332617	3102	3102	0	#N/A	0.013028	VACV			FALSE
20221007_MS_MRMhr_DC24_VACV_53C_r3.wiff	53C_r3	TSYKFESV	8	C44H65N9O15	TSYKFESV	TSYKFESV	TSYKFESV	TSYKFESV	0.8689	0.9965	#N/A	18.84+/-0.13	#N/A	959.46	2	480.737	#N/A	18.84	206992	175159	31833	0	0	0	#N/A	0.003769	VACV			FALSE
20221007_MS_MRMhr_DC24_VACV_57C_r1.wiff	57C_r1	TSYKFESV	8	C44H65N9O15	TSYKFESV	TSYKFESV	TSYKFESV	TSYKFESV	0.9033	0.9898	#N/A	18.84+/-0.13	#N/A	959.46	2	480.737	#N/A	18.84	71367	33488	37878	1470	1470	0	#N/A	0.002159	VACV			FALSE
20221007_MS_MRMhr_DC24_VACV_57C_r2.wiff	57C_r2	TSYKFESV	8	C44H65N9O15	TSYKFESV	TSYKFESV	TSYKFESV	TSYKFESV	0.6323	0.9864	#N/A	18.84+/-0.13	#N/A	959.46	2	480.737	#N/A	18.84	32511	27775	4736	619	619	0	#N/A	0.001051	VACV			FALSE
20221007_MS_MRMhr_DC24_VACV_57C_r3.wiff	57C_r3	TSYKFESV	8	C44H65N9O15	TSYKFESV	TSYKFESV	TSYKFESV	TSYKFESV	0.4804	0.9501	#N/A	18.84+/-0.13	#N/A	959.46	2	480.737	#N/A	18.84	19658	17521	2138	0	0	0	#N/A	0.000745	VACV			FALSE
20221007_MS_MRMhr_DC24_VACV_61C_r1.wiff	61C_r1	TSYKFESV	8	C44H65N9O15	TSYKFESV	TSYKFESV	TSYKFESV	TSYKFESV	0.4804	0.9217	#N/A	18.84+/-0.13	#N/A	959.46	2	480.737	#N/A	18.84	7711	7634	77	0	0	0	#N/A	0.000363	VACV			FALSE
20221007_MS_MRMhr_DC24_VACV_61C_r2.wiff	61C_r2	TSYKFESV	8	C44H65N9O15	TSYKFESV	TSYKFESV	TSYKFESV	TSYKFESV	0.4804	0.9186	#N/A	18.84+/-0.13	#N/A	959.46	2	480.737	#N/A	18.84	5604	4967	637	710	710	0	#N/A	0.000269	VACV			FALSE
20221007_MS_MRMhr_DC24_VACV_61C_r3.wiff	61C_r3	TSYKFESV	8	C44H65N9O15	TSYKFESV	TSYKFESV	TSYKFESV	TSYKFESV	0	0.9274	#N/A	18.84+/-0.13	#N/A	959.46	2	480.737	#N/A	18.84	7575	7575	0	601	601	0	#N/A	0.000325	VACV			FALSE
20221007_MS_MRMhr_DC24_VACV_65C_r1.wiff	65C_r1	TSYKFESV	8	C44H65N9O15	TSYKFESV	TSYKFESV	TSYKFESV	TSYKFESV	0	0.8289	#N/A	18.84+/-0.13	#N/A	959.46	2	480.737	#N/A	18.84	2315	2315	0	1259	1259	0	#N/A	âˆž	VACV			FALSE
20221007_MS_MRMhr_DC24_VACV_65C_r2.wiff	65C_r2	TSYKFESV	8	C44H65N9O15	TSYKFESV	TSYKFESV	TSYKFESV	TSYKFESV	0	0.7625	#N/A	18.84+/-0.13	#N/A	959.46	2	480.737	#N/A	18.84	1417	1417	0	444	444	0	#N/A	âˆž	VACV			FALSE
20221007_MS_MRMhr_DC24_VACV_69C_r1.wiff	69C_r1	TSYKFESV	8	C44H65N9O15	TSYKFESV	TSYKFESV	TSYKFESV	TSYKFESV	0	0.7387	#N/A	18.84+/-0.13	#N/A	959.46	2	480.737	#N/A	18.84	2242	2242	0	1266	1266	0	#N/A	âˆž	VACV			FALSE
20221007_MS_MRMhr_DC24_VACV_69C_r2.wiff	69C_r2	TSYKFESV	8	C44H65N9O15	TSYKFESV	TSYKFESV	TSYKFESV	TSYKFESV	0	0.7454	#N/A	18.84+/-0.13	#N/A	959.46	2	480.737	#N/A	18.84	3561	3561	0	226	226	0	#N/A	âˆž	VACV			FALSE
20221007_MS_MRMhr_DC24_VACV_69C_r3.wiff	69C_r3	TSYKFESV	8	C44H65N9O15	TSYKFESV	TSYKFESV	TSYKFESV	TSYKFESV	0	0.7737	#N/A	18.84+/-0.13	#N/A	959.46	2	480.737	#N/A	18.84	3636	3636	0	0	0	0	#N/A	âˆž	VACV			FALSE
20221007_MS_MRMhr_DC24_VACV_73C_r1.wiff	73C_r1	TSYKFESV	8	C44H65N9O15	TSYKFESV	TSYKFESV	TSYKFESV	TSYKFESV	0	0.725	#N/A	18.84+/-0.13	#N/A	959.46	2	480.737	#N/A	18.84	3236	3236	0	608	608	0	#N/A	âˆž	VACV			FALSE
20221007_MS_MRMhr_DC24_VACV_73C_r2.wiff	73C_r2	TSYKFESV	8	C44H65N9O15	TSYKFESV	TSYKFESV	TSYKFESV	TSYKFESV	0	0.5335	#N/A	18.84+/-0.13	#N/A	959.46	2	480.737	#N/A	18.84	1631	1631	0	0	0	0	#N/A	âˆž	VACV			FALSE
20221007_MS_MRMhr_DC24_VACV_73C_r3.wiff	73C_r3	TSYKFESV	8	C44H65N9O15	TSYKFESV	TSYKFESV	TSYKFESV	TSYKFESV	0	0.4678	#N/A	18.84+/-0.13	#N/A	959.46	2	480.737	#N/A	18.84	2108	2108	0	162	162	0	#N/A	âˆž	VACV			FALSE
20221010_MS_zenoSWATH_DC24_VACV_37C_r1.wiff	SWATH_r1	ITYRFYLINL	10	C65H98N14O15	ITYRFYLINL	ITYRFYLINL	ITYRFYLINL	ITYRFYLINL	0.9585	0.9955	#N/A	40.67+/-0.05	#N/A	1314.73	2	658.374	#N/A	40.73	387818	145774	242044	2046	2046	0	#N/A	0.002826	VACV			FALSE
20221010_MS_zenoSWATH_DC24_VACV_37C_r2.wiff	SWATH_r2	ITYRFYLINL	10	C65H98N14O15	ITYRFYLINL	ITYRFYLINL	ITYRFYLINL	ITYRFYLINL	0.9614	0.9934	#N/A	40.67+/-0.05	#N/A	1314.73	2	658.374	#N/A	40.73	298045	107141	190904	546	546	0	#N/A	0.003088	VACV			FALSE
20221010_MS_zenoSWATH_DC24_VACV_37C_r3.wiff	SWATH_r3	ITYRFYLINL	10	C65H98N14O15	ITYRFYLINL	ITYRFYLINL	ITYRFYLINL	ITYRFYLINL	0.9621	0.9917	#N/A	40.67+/-0.05	#N/A	1314.73	2	658.374	#N/A	40.73	159763	56971	102792	201	201	0	#N/A	0.0014	VACV			FALSE
20221007_MS_MRMhr_DC24_VACV_37C_r1.wiff	37C_r1	ITYRFYLINL	10	C65H98N14O15	ITYRFYLINL	ITYRFYLINL	ITYRFYLINL	ITYRFYLINL	0.9455	0.9981	#N/A	40.67+/-0.05	#N/A	1314.73	2	658.374	#N/A	40.73	601262	285425	315837	2476	2476	0	#N/A	0.005076	VACV			FALSE
20221007_MS_MRMhr_DC24_VACV_37C_r2.wiff	37C_r2	ITYRFYLINL	10	C65H98N14O15	ITYRFYLINL	ITYRFYLINL	ITYRFYLINL	ITYRFYLINL	0.9718	0.9955	#N/A	40.67+/-0.05	#N/A	1314.73	2	658.374	#N/A	40.73	527284	256740	270544	134	134	0	#N/A	0.004404	VACV			FALSE
20221007_MS_MRMhr_DC24_VACV_37C_r3.wiff	37C_r3	ITYRFYLINL	10	C65H98N14O15	ITYRFYLINL	ITYRFYLINL	ITYRFYLINL	ITYRFYLINL	0.936	0.9937	#N/A	40.67+/-0.05	#N/A	1314.73	2	658.374	#N/A	40.73	150555	78154	72401	695	695	0	#N/A	0.001509	VACV			FALSE
20221007_MS_MRMhr_DC24_VACV_41C_r1.wiff	41C_r1	ITYRFYLINL	10	C65H98N14O15	ITYRFYLINL	ITYRFYLINL	ITYRFYLINL	ITYRFYLINL	0.7398	0.9885	#N/A	40.67+/-0.05	#N/A	1314.73	2	658.374	#N/A	40.73	22829	14532	8298	0	0	0	#N/A	0.000322	VACV			FALSE
20221007_MS_MRMhr_DC24_VACV_41C_r2.wiff	41C_r2	ITYRFYLINL	10	C65H98N14O15	ITYRFYLINL	ITYRFYLINL	ITYRFYLINL	ITYRFYLINL	0.9416	0.9913	#N/A	40.67+/-0.05	#N/A	1314.73	2	658.374	#N/A	40.73	226107	111965	114142	385	385	0	#N/A	0.001994	VACV			FALSE
20221007_MS_MRMhr_DC24_VACV_41C_r3.wiff	41C_r3	ITYRFYLINL	10	C65H98N14O15	ITYRFYLINL	ITYRFYLINL	ITYRFYLINL	ITYRFYLINL	0.9406	0.9967	#N/A	40.67+/-0.05	#N/A	1314.73	2	658.374	#N/A	40.73	486955	218196	268760	0	0	0	#N/A	0.003779	VACV			FALSE
20221007_MS_MRMhr_DC24_VACV_45C_r1.wiff	45C_r1	ITYRFYLINL	10	C65H98N14O15	ITYRFYLINL	ITYRFYLINL	ITYRFYLINL	ITYRFYLINL	0.9599	0.9991	#N/A	40.67+/-0.05	#N/A	1314.73	2	658.374	#N/A	40.73	669155	322446	346709	3102	3102	0	#N/A	0.006984	VACV			FALSE
20221007_MS_MRMhr_DC24_VACV_45C_r2.wiff	45C_r2	ITYRFYLINL	10	C65H98N14O15	ITYRFYLINL	ITYRFYLINL	ITYRFYLINL	ITYRFYLINL	0.9433	0.9913	#N/A	40.67+/-0.05	#N/A	1314.73	2	658.374	#N/A	40.73	409479	189487	219992	769	769	0	#N/A	0.004011	VACV			FALSE
20221007_MS_MRMhr_DC24_VACV_45C_r3.wiff	45C_r3	ITYRFYLINL	10	C65H98N14O15	ITYRFYLINL	ITYRFYLINL	ITYRFYLINL	ITYRFYLINL	0.9589	0.9925	#N/A	40.67+/-0.05	#N/A	1314.73	2	658.374	#N/A	40.73	570344	258646	311698	1853	1853	0	#N/A	0.00517	VACV			FALSE
20221007_MS_MRMhr_DC24_VACV_49C_r1.wiff	49C_r1	ITYRFYLINL	10	C65H98N14O15	ITYRFYLINL	ITYRFYLINL	ITYRFYLINL	ITYRFYLINL	0.9674	0.9994	#N/A	40.67+/-0.05	#N/A	1314.73	2	658.374	#N/A	40.73	500022	250053	249969	1938	1938	0	#N/A	0.008301	VACV			FALSE
20221007_MS_MRMhr_DC24_VACV_49C_r2.wiff	49C_r2	ITYRFYLINL	10	C65H98N14O15	ITYRFYLINL	ITYRFYLINL	ITYRFYLINL	ITYRFYLINL	0.8962	0.9964	#N/A	40.67+/-0.05	#N/A	1314.73	2	658.374	#N/A	40.73	163326	76741	86586	994	994	0	#N/A	0.00212	VACV			FALSE
20221007_MS_MRMhr_DC24_VACV_49C_r3.wiff	49C_r3	ITYRFYLINL	10	C65H98N14O15	ITYRFYLINL	ITYRFYLINL	ITYRFYLINL	ITYRFYLINL	0.62	0.9745	#N/A	40.67+/-0.05	#N/A	1314.73	2	658.374	#N/A	40.73	16974	10797	6176	181	181	0	#N/A	0.000275	VACV			FALSE
20221007_MS_MRMhr_DC24_VACV_53C_r1.wiff	53C_r1	ITYRFYLINL	10	C65H98N14O15	ITYRFYLINL	ITYRFYLINL	ITYRFYLINL	ITYRFYLINL	0.9703	0.9974	#N/A	40.67+/-0.05	#N/A	1314.73	2	658.374	#N/A	40.73	324986	179789	145197	1640	1640	0	#N/A	0.005466	VACV			FALSE
20221007_MS_MRMhr_DC24_VACV_53C_r2.wiff	53C_r2	ITYRFYLINL	10	C65H98N14O15	ITYRFYLINL	ITYRFYLINL	ITYRFYLINL	ITYRFYLINL	0.6782	0.9363	#N/A	40.67+/-0.05	#N/A	1314.73	2	658.374	#N/A	40.73	18223	9120	9103	717	717	0	#N/A	0.000426	VACV			FALSE
20221007_MS_MRMhr_DC24_VACV_53C_r3.wiff	53C_r3	ITYRFYLINL	10	C65H98N14O15	ITYRFYLINL	ITYRFYLINL	ITYRFYLINL	ITYRFYLINL	0.8169	0.9937	#N/A	40.67+/-0.05	#N/A	1314.73	2	658.374	#N/A	40.73	60798	27604	33193	1032	1032	0	#N/A	0.001107	VACV			FALSE
20221007_MS_MRMhr_DC24_VACV_57C_r1.wiff	57C_r1	ITYRFYLINL	10	C65H98N14O15	ITYRFYLINL	ITYRFYLINL	ITYRFYLINL	ITYRFYLINL	0.9721	0.9966	#N/A	40.67+/-0.05	#N/A	1314.73	2	658.374	#N/A	40.73	1663976	893590	770386	15364	15364	0	#N/A	0.050331	VACV			FALSE
20221007_MS_MRMhr_DC24_VACV_57C_r2.wiff	57C_r2	ITYRFYLINL	10	C65H98N14O15	ITYRFYLINL	ITYRFYLINL	ITYRFYLINL	ITYRFYLINL	0.988	0.9951	#N/A	40.67+/-0.05	#N/A	1314.73	2	658.374	#N/A	40.73	1992873	1117777	875096	3969	3969	0	#N/A	0.064405	VACV			FALSE
20221007_MS_MRMhr_DC24_VACV_57C_r3.wiff	57C_r3	ITYRFYLINL	10	C65H98N14O15	ITYRFYLINL	ITYRFYLINL	ITYRFYLINL	ITYRFYLINL	0.9682	0.9945	#N/A	40.67+/-0.05	#N/A	1314.73	2	658.374	#N/A	40.73	1316858	672998	643860	3114	3114	0	#N/A	0.049888	VACV			FALSE
20221007_MS_MRMhr_DC24_VACV_61C_r1.wiff	61C_r1	ITYRFYLINL	10	C65H98N14O15	ITYRFYLINL	ITYRFYLINL	ITYRFYLINL	ITYRFYLINL	0.9696	0.9909	#N/A	40.67+/-0.05	#N/A	1314.73	2	658.374	#N/A	40.73	1201898	629324	572574	942	942	0	#N/A	0.056657	VACV			FALSE
20221007_MS_MRMhr_DC24_VACV_61C_r2.wiff	61C_r2	ITYRFYLINL	10	C65H98N14O15	ITYRFYLINL	ITYRFYLINL	ITYRFYLINL	ITYRFYLINL	0.9797	0.9957	#N/A	40.67+/-0.05	#N/A	1314.73	2	658.374	#N/A	40.73	1143324	631520	511804	4599	2649	1950	#N/A	0.054811	VACV			FALSE
20221007_MS_MRMhr_DC24_VACV_61C_r3.wiff	61C_r3	ITYRFYLINL	10	C65H98N14O15	ITYRFYLINL	ITYRFYLINL	ITYRFYLINL	ITYRFYLINL	0.9885	0.9961	#N/A	40.67+/-0.05	#N/A	1314.73	2	658.374	#N/A	40.73	1877011	955913	921099	690	690	0	#N/A	0.080545	VACV			FALSE
20221007_MS_MRMhr_DC24_VACV_65C_r1.wiff	65C_r1	ITYRFYLINL	10	C65H98N14O15	ITYRFYLINL	ITYRFYLINL	ITYRFYLINL	ITYRFYLINL	0.9794	0.9992	#N/A	40.67+/-0.05	#N/A	1314.73	2	658.374	#N/A	40.73	2741784	1457743	1284041	6701	6701	0	#N/A	âˆž	VACV			FALSE
20221007_MS_MRMhr_DC24_VACV_65C_r2.wiff	65C_r2	ITYRFYLINL	10	C65H98N14O15	ITYRFYLINL	ITYRFYLINL	ITYRFYLINL	ITYRFYLINL	0.9679	0.9992	#N/A	40.67+/-0.05	#N/A	1314.73	2	658.374	#N/A	40.73	1344642	698965	645677	10352	10352	0	#N/A	âˆž	VACV			FALSE
20221007_MS_MRMhr_DC24_VACV_69C_r1.wiff	69C_r1	ITYRFYLINL	10	C65H98N14O15	ITYRFYLINL	ITYRFYLINL	ITYRFYLINL	ITYRFYLINL	0.9694	0.9983	#N/A	40.67+/-0.05	#N/A	1314.73	2	658.374	#N/A	40.73	4073766	2184150	1889616	29681	29681	0	#N/A	âˆž	VACV			FALSE
20221007_MS_MRMhr_DC24_VACV_69C_r2.wiff	69C_r2	ITYRFYLINL	10	C65H98N14O15	ITYRFYLINL	ITYRFYLINL	ITYRFYLINL	ITYRFYLINL	0.9719	0.9973	#N/A	40.67+/-0.05	#N/A	1314.73	2	658.374	#N/A	40.73	3303840	1781137	1522703	19313	19313	0	#N/A	âˆž	VACV			FALSE
20221007_MS_MRMhr_DC24_VACV_69C_r3.wiff	69C_r3	ITYRFYLINL	10	C65H98N14O15	ITYRFYLINL	ITYRFYLINL	ITYRFYLINL	ITYRFYLINL	0.9896	0.9979	#N/A	40.67+/-0.05	#N/A	1314.73	2	658.374	#N/A	40.73	4071559	2124811	1946748	26726	26726	0	#N/A	âˆž	VACV			FALSE
20221007_MS_MRMhr_DC24_VACV_73C_r1.wiff	73C_r1	ITYRFYLINL	10	C65H98N14O15	ITYRFYLINL	ITYRFYLINL	ITYRFYLINL	ITYRFYLINL	0.9727	0.9973	#N/A	40.67+/-0.05	#N/A	1314.73	2	658.374	#N/A	40.73	7362816	4064975	3297841	28095	28095	0	#N/A	âˆž	VACV			FALSE
20221007_MS_MRMhr_DC24_VACV_73C_r2.wiff	73C_r2	ITYRFYLINL	10	C65H98N14O15	ITYRFYLINL	ITYRFYLINL	ITYRFYLINL	ITYRFYLINL	0.9693	0.9958	#N/A	40.67+/-0.05	#N/A	1314.73	2	658.374	#N/A	40.73	10595085	5735965	4859121	103361	70660	32701	#N/A	âˆž	VACV			FALSE
20221007_MS_MRMhr_DC24_VACV_73C_r3.wiff	73C_r3	ITYRFYLINL	10	C65H98N14O15	ITYRFYLINL	ITYRFYLINL	ITYRFYLINL	ITYRFYLINL	0.9725	0.9973	#N/A	40.67+/-0.05	#N/A	1314.73	2	658.374	#N/A	40.73	9200041	5239923	3960118	50607	37495	13112	#N/A	âˆž	VACV			FALSE
20221010_MS_zenoSWATH_DC24_VACV_37C_r1.wiff	SWATH_r1	KNYLFNAI	8	C47H71N11O12	KNYLFNAI	KNYLFNAI	KNYLFNAI	KNYLFNAI	0.9712	0.9959	#N/A	29.09+/-0.06	#N/A	981.528	2	491.771	#N/A	29.12	962861	302215	660645	4612	1322	3290	#N/A	0.007016	VACV			FALSE
20221010_MS_zenoSWATH_DC24_VACV_37C_r2.wiff	SWATH_r2	KNYLFNAI	8	C47H71N11O12	KNYLFNAI	KNYLFNAI	KNYLFNAI	KNYLFNAI	0.9777	0.9952	#N/A	29.09+/-0.06	#N/A	981.528	2	491.771	#N/A	29.12	668449	195127	473323	7206	5296	1910	#N/A	0.006926	VACV			FALSE
20221010_MS_zenoSWATH_DC24_VACV_37C_r3.wiff	SWATH_r3	KNYLFNAI	8	C47H71N11O12	KNYLFNAI	KNYLFNAI	KNYLFNAI	KNYLFNAI	0.9712	0.9985	#N/A	29.09+/-0.06	#N/A	981.528	2	491.771	#N/A	29.12	727995	223022	504974	1599	476	1123	#N/A	0.006378	VACV			FALSE
20221007_MS_MRMhr_DC24_VACV_37C_r1.wiff	37C_r1	KNYLFNAI	8	C47H71N11O12	KNYLFNAI	KNYLFNAI	KNYLFNAI	KNYLFNAI	0.9827	0.9922	#N/A	29.09+/-0.06	#N/A	981.528	2	491.771	#N/A	29.12	1139775	482723	657052	8536	8536	0	#N/A	0.009622	VACV			FALSE
20221007_MS_MRMhr_DC24_VACV_37C_r2.wiff	37C_r2	KNYLFNAI	8	C47H71N11O12	KNYLFNAI	KNYLFNAI	KNYLFNAI	KNYLFNAI	0.9919	0.9972	#N/A	29.09+/-0.06	#N/A	981.528	2	491.771	#N/A	29.12	1192708	452804	739904	10939	10939	0	#N/A	0.009961	VACV			FALSE
20221007_MS_MRMhr_DC24_VACV_37C_r3.wiff	37C_r3	KNYLFNAI	8	C47H71N11O12	KNYLFNAI	KNYLFNAI	KNYLFNAI	KNYLFNAI	0.9751	0.9927	#N/A	29.09+/-0.06	#N/A	981.528	2	491.771	#N/A	29.12	973345	408531	564813	14037	14037	0	#N/A	0.009759	VACV			FALSE
20221007_MS_MRMhr_DC24_VACV_41C_r1.wiff	41C_r1	KNYLFNAI	8	C47H71N11O12	KNYLFNAI	KNYLFNAI	KNYLFNAI	KNYLFNAI	0.9781	0.9893	#N/A	29.09+/-0.06	#N/A	981.528	2	491.771	#N/A	29.12	455265	201609	253656	4899	4899	0	#N/A	0.006416	VACV			FALSE
20221007_MS_MRMhr_DC24_VACV_41C_r2.wiff	41C_r2	KNYLFNAI	8	C47H71N11O12	KNYLFNAI	KNYLFNAI	KNYLFNAI	KNYLFNAI	0.9747	0.9986	#N/A	29.09+/-0.06	#N/A	981.528	2	491.771	#N/A	29.12	1004791	428102	576689	0	0	0	#N/A	0.00886	VACV			FALSE
20221007_MS_MRMhr_DC24_VACV_41C_r3.wiff	41C_r3	KNYLFNAI	8	C47H71N11O12	KNYLFNAI	KNYLFNAI	KNYLFNAI	KNYLFNAI	0.9843	0.995	#N/A	29.09+/-0.06	#N/A	981.528	2	491.771	#N/A	29.12	1324217	529512	794706	5177	5177	0	#N/A	0.010276	VACV			FALSE
20221007_MS_MRMhr_DC24_VACV_45C_r1.wiff	45C_r1	KNYLFNAI	8	C47H71N11O12	KNYLFNAI	KNYLFNAI	KNYLFNAI	KNYLFNAI	0.9794	0.9978	#N/A	29.09+/-0.06	#N/A	981.528	2	491.771	#N/A	29.12	730027	332953	397074	1376	1376	0	#N/A	0.007619	VACV			FALSE
20221007_MS_MRMhr_DC24_VACV_45C_r2.wiff	45C_r2	KNYLFNAI	8	C47H71N11O12	KNYLFNAI	KNYLFNAI	KNYLFNAI	KNYLFNAI	0.9724	0.9902	#N/A	29.09+/-0.06	#N/A	981.528	2	491.771	#N/A	29.12	890911	369548	521362	6027	6027	0	#N/A	0.008726	VACV			FALSE
20221007_MS_MRMhr_DC24_VACV_45C_r3.wiff	45C_r3	KNYLFNAI	8	C47H71N11O12	KNYLFNAI	KNYLFNAI	KNYLFNAI	KNYLFNAI	0.9783	0.9972	#N/A	29.09+/-0.06	#N/A	981.528	2	491.771	#N/A	29.12	992863	408095	584767	7330	7330	0	#N/A	0.009	VACV			FALSE
20221007_MS_MRMhr_DC24_VACV_49C_r1.wiff	49C_r1	KNYLFNAI	8	C47H71N11O12	KNYLFNAI	KNYLFNAI	KNYLFNAI	KNYLFNAI	0.9508	0.9862	#N/A	29.09+/-0.06	#N/A	981.528	2	491.771	#N/A	29.12	213543	96298	117245	0	0	0	#N/A	0.003545	VACV			FALSE
20221007_MS_MRMhr_DC24_VACV_49C_r2.wiff	49C_r2	KNYLFNAI	8	C47H71N11O12	KNYLFNAI	KNYLFNAI	KNYLFNAI	KNYLFNAI	0.9708	0.9918	#N/A	29.09+/-0.06	#N/A	981.528	2	491.771	#N/A	29.12	656476	281547	374929	1279	1279	0	#N/A	0.008521	VACV			FALSE
20221007_MS_MRMhr_DC24_VACV_49C_r3.wiff	49C_r3	KNYLFNAI	8	C47H71N11O12	KNYLFNAI	KNYLFNAI	KNYLFNAI	KNYLFNAI	0.9776	0.9898	#N/A	29.09+/-0.06	#N/A	981.528	2	491.771	#N/A	29.12	473068	207126	265943	1785	1785	0	#N/A	0.007652	VACV			FALSE
20221007_MS_MRMhr_DC24_VACV_53C_r1.wiff	53C_r1	KNYLFNAI	8	C47H71N11O12	KNYLFNAI	KNYLFNAI	KNYLFNAI	KNYLFNAI	0.9749	0.9967	#N/A	29.09+/-0.06	#N/A	981.528	2	491.771	#N/A	29.12	480510	210431	270079	345	345	0	#N/A	0.008082	VACV			FALSE
20221007_MS_MRMhr_DC24_VACV_53C_r2.wiff	53C_r2	KNYLFNAI	8	C47H71N11O12	KNYLFNAI	KNYLFNAI	KNYLFNAI	KNYLFNAI	0.9334	0.9884	#N/A	29.09+/-0.06	#N/A	981.528	2	491.771	#N/A	29.12	219598	84127	135470	1923	1923	0	#N/A	0.005129	VACV			FALSE
20221007_MS_MRMhr_DC24_VACV_53C_r3.wiff	53C_r3	KNYLFNAI	8	C47H71N11O12	KNYLFNAI	KNYLFNAI	KNYLFNAI	KNYLFNAI	0.9633	0.9914	#N/A	29.09+/-0.06	#N/A	981.528	2	491.771	#N/A	29.12	387101	168916	218185	1450	1450	0	#N/A	0.007048	VACV			FALSE
20221007_MS_MRMhr_DC24_VACV_57C_r1.wiff	57C_r1	KNYLFNAI	8	C47H71N11O12	KNYLFNAI	KNYLFNAI	KNYLFNAI	KNYLFNAI	0.8642	0.9508	#N/A	29.09+/-0.06	#N/A	981.528	2	491.771	#N/A	29.12	66803	32650	34153	2843	2843	0	#N/A	0.002021	VACV			FALSE
20221007_MS_MRMhr_DC24_VACV_57C_r2.wiff	57C_r2	KNYLFNAI	8	C47H71N11O12	KNYLFNAI	KNYLFNAI	KNYLFNAI	KNYLFNAI	0.8087	0.8678	#N/A	29.09+/-0.06	#N/A	981.528	2	491.771	#N/A	29.12	44388	31336	13051	0	0	0	#N/A	0.001435	VACV			FALSE
20221007_MS_MRMhr_DC24_VACV_57C_r3.wiff	57C_r3	KNYLFNAI	8	C47H71N11O12	KNYLFNAI	KNYLFNAI	KNYLFNAI	KNYLFNAI	0.7998	0.8783	#N/A	29.09+/-0.06	#N/A	981.528	2	491.771	#N/A	29.12	37374	24305	13069	0	0	0	#N/A	0.001416	VACV			FALSE
20221007_MS_MRMhr_DC24_VACV_61C_r1.wiff	61C_r1	KNYLFNAI	8	C47H71N11O12	KNYLFNAI	KNYLFNAI	KNYLFNAI	KNYLFNAI	0.4039	0.8974	#N/A	29.09+/-0.06	#N/A	981.528	2	491.771	#N/A	29.12	10282	8406	1876	0	0	0	#N/A	0.000485	VACV			FALSE
20221007_MS_MRMhr_DC24_VACV_61C_r2.wiff	61C_r2	KNYLFNAI	8	C47H71N11O12	KNYLFNAI	KNYLFNAI	KNYLFNAI	KNYLFNAI	0.254	0.6743	#N/A	29.09+/-0.06	#N/A	981.528	2	491.771	#N/A	29.12	16134	15357	777	0	0	0	#N/A	0.000773	VACV			FALSE
20221007_MS_MRMhr_DC24_VACV_61C_r3.wiff	61C_r3	KNYLFNAI	8	C47H71N11O12	KNYLFNAI	KNYLFNAI	KNYLFNAI	KNYLFNAI	0.4309	0.859	#N/A	29.09+/-0.06	#N/A	981.528	2	491.771	#N/A	29.12	7355	6769	587	0	0	0	#N/A	0.000316	VACV			FALSE
20221007_MS_MRMhr_DC24_VACV_65C_r1.wiff	65C_r1	KNYLFNAI	8	C47H71N11O12	KNYLFNAI	KNYLFNAI	KNYLFNAI	KNYLFNAI	0	0.8049	#N/A	29.09+/-0.06	#N/A	981.528	2	491.771	#N/A	29.12	5384	5384	0	1468	1468	0	#N/A	âˆž	VACV			FALSE
20221007_MS_MRMhr_DC24_VACV_65C_r2.wiff	65C_r2	KNYLFNAI	8	C47H71N11O12	KNYLFNAI	KNYLFNAI	KNYLFNAI	KNYLFNAI	0	0.756	#N/A	29.09+/-0.06	#N/A	981.528	2	491.771	#N/A	29.12	2997	2997	0	0	0	0	#N/A	âˆž	VACV			FALSE
20221007_MS_MRMhr_DC24_VACV_69C_r1.wiff	69C_r1	KNYLFNAI	8	C47H71N11O12	KNYLFNAI	KNYLFNAI	KNYLFNAI	KNYLFNAI	0	0.7203	#N/A	29.09+/-0.06	#N/A	981.528	2	491.771	#N/A	29.12	5283	5283	0	0	0	0	#N/A	âˆž	VACV			FALSE
20221007_MS_MRMhr_DC24_VACV_69C_r2.wiff	69C_r2	KNYLFNAI	8	C47H71N11O12	KNYLFNAI	KNYLFNAI	KNYLFNAI	KNYLFNAI	0.2486	0.5743	#N/A	29.09+/-0.06	#N/A	981.528	2	491.771	#N/A	29.12	7068	6942	126	1956	1956	0	#N/A	âˆž	VACV			FALSE
20221007_MS_MRMhr_DC24_VACV_69C_r3.wiff	69C_r3	KNYLFNAI	8	C47H71N11O12	KNYLFNAI	KNYLFNAI	KNYLFNAI	KNYLFNAI	0.2486	0.8165	#N/A	29.09+/-0.06	#N/A	981.528	2	491.771	#N/A	29.12	4376	4307	68	3403	3403	0	#N/A	âˆž	VACV			FALSE
20221007_MS_MRMhr_DC24_VACV_73C_r1.wiff	73C_r1	KNYLFNAI	8	C47H71N11O12	KNYLFNAI	KNYLFNAI	KNYLFNAI	KNYLFNAI	0	0.6749	#N/A	29.09+/-0.06	#N/A	981.528	2	491.771	#N/A	29.12	2315	2315	0	467	467	0	#N/A	âˆž	VACV			FALSE
20221007_MS_MRMhr_DC24_VACV_73C_r2.wiff	73C_r2	KNYLFNAI	8	C47H71N11O12	KNYLFNAI	KNYLFNAI	KNYLFNAI	KNYLFNAI	0.4789	0.8016	#N/A	29.09+/-0.06	#N/A	981.528	2	491.771	#N/A	29.12	3198	2292	906	644	644	0	#N/A	âˆž	VACV			FALSE
20221007_MS_MRMhr_DC24_VACV_73C_r3.wiff	73C_r3	KNYLFNAI	8	C47H71N11O12	KNYLFNAI	KNYLFNAI	KNYLFNAI	KNYLFNAI	0	0.6422	#N/A	29.09+/-0.06	#N/A	981.528	2	491.771	#N/A	29.12	5577	5577	0	936	936	0	#N/A	âˆž	VACV			FALSE
20221010_MS_zenoSWATH_DC24_VACV_37C_r1.wiff	SWATH_r1	DLFPSFVRL	9	C53H80N12O13	DLFPSFVRL	DLFPSFVRL	DLFPSFVRL	DLFPSFVRL	0.9763	0.9916	#N/A	41.94+/-0.07	#N/A	1092.6	2	547.306	#N/A	41.94	1825371	383110	1442261	9193	1208	7985	#N/A	0.0133	VACV			FALSE
20221010_MS_zenoSWATH_DC24_VACV_37C_r2.wiff	SWATH_r2	DLFPSFVRL	9	C53H80N12O13	DLFPSFVRL	DLFPSFVRL	DLFPSFVRL	DLFPSFVRL	0.9708	0.9955	#N/A	41.94+/-0.07	#N/A	1092.6	2	547.306	#N/A	41.94	1098676	226564	872111	3991	923	3068	#N/A	0.011384	VACV			FALSE
20221010_MS_zenoSWATH_DC24_VACV_37C_r3.wiff	SWATH_r3	DLFPSFVRL	9	C53H80N12O13	DLFPSFVRL	DLFPSFVRL	DLFPSFVRL	DLFPSFVRL	0.9776	0.9875	#N/A	41.94+/-0.07	#N/A	1092.6	2	547.306	#N/A	41.94	1523270	296769	1226501	14364	1757	12607	#N/A	0.013344	VACV			FALSE
20221007_MS_MRMhr_DC24_VACV_37C_r1.wiff	37C_r1	DLFPSFVRL	9	C53H80N12O13	DLFPSFVRL	DLFPSFVRL	DLFPSFVRL	DLFPSFVRL	0.9587	0.9978	#N/A	41.94+/-0.07	#N/A	1092.6	2	547.306	#N/A	41.94	2008117	647271	1360846	11438	11438	0	#N/A	0.016953	VACV			FALSE
20221007_MS_MRMhr_DC24_VACV_37C_r2.wiff	37C_r2	DLFPSFVRL	9	C53H80N12O13	DLFPSFVRL	DLFPSFVRL	DLFPSFVRL	DLFPSFVRL	0.983	0.9957	#N/A	41.94+/-0.07	#N/A	1092.6	2	547.306	#N/A	41.94	1864113	537718	1326395	4567	3208	1359	#N/A	0.015568	VACV			FALSE
20221007_MS_MRMhr_DC24_VACV_37C_r3.wiff	37C_r3	DLFPSFVRL	9	C53H80N12O13	DLFPSFVRL	DLFPSFVRL	DLFPSFVRL	DLFPSFVRL	0.9638	0.9961	#N/A	41.94+/-0.07	#N/A	1092.6	2	547.306	#N/A	41.94	1468164	440868	1027295	772	772	0	#N/A	0.01472	VACV			FALSE
20221007_MS_MRMhr_DC24_VACV_41C_r1.wiff	41C_r1	DLFPSFVRL	9	C53H80N12O13	DLFPSFVRL	DLFPSFVRL	DLFPSFVRL	DLFPSFVRL	0.9436	0.9984	#N/A	41.94+/-0.07	#N/A	1092.6	2	547.306	#N/A	41.94	245683	76082	169601	0	0	0	#N/A	0.003462	VACV			FALSE
20221007_MS_MRMhr_DC24_VACV_41C_r2.wiff	41C_r2	DLFPSFVRL	9	C53H80N12O13	DLFPSFVRL	DLFPSFVRL	DLFPSFVRL	DLFPSFVRL	0.9806	0.9992	#N/A	41.94+/-0.07	#N/A	1092.6	2	547.306	#N/A	41.94	1167407	356724	810683	5403	5403	0	#N/A	0.010294	VACV			FALSE
20221007_MS_MRMhr_DC24_VACV_41C_r3.wiff	41C_r3	DLFPSFVRL	9	C53H80N12O13	DLFPSFVRL	DLFPSFVRL	DLFPSFVRL	DLFPSFVRL	0.977	0.9975	#N/A	41.94+/-0.07	#N/A	1092.6	2	547.306	#N/A	41.94	2022808	600465	1422343	0	0	0	#N/A	0.015697	VACV			FALSE
20221007_MS_MRMhr_DC24_VACV_45C_r1.wiff	45C_r1	DLFPSFVRL	9	C53H80N12O13	DLFPSFVRL	DLFPSFVRL	DLFPSFVRL	DLFPSFVRL	0.9898	0.9969	#N/A	41.94+/-0.07	#N/A	1092.6	2	547.306	#N/A	41.94	1401317	424234	977083	668	668	0	#N/A	0.014625	VACV			FALSE
20221007_MS_MRMhr_DC24_VACV_45C_r2.wiff	45C_r2	DLFPSFVRL	9	C53H80N12O13	DLFPSFVRL	DLFPSFVRL	DLFPSFVRL	DLFPSFVRL	0.9706	0.9984	#N/A	41.94+/-0.07	#N/A	1092.6	2	547.306	#N/A	41.94	1595939	494040	1101900	1767	1767	0	#N/A	0.015632	VACV			FALSE
20221007_MS_MRMhr_DC24_VACV_45C_r3.wiff	45C_r3	DLFPSFVRL	9	C53H80N12O13	DLFPSFVRL	DLFPSFVRL	DLFPSFVRL	DLFPSFVRL	0.9632	0.9978	#N/A	41.94+/-0.07	#N/A	1092.6	2	547.306	#N/A	41.94	1681476	519317	1162159	2167	2167	0	#N/A	0.015243	VACV			FALSE
20221007_MS_MRMhr_DC24_VACV_49C_r1.wiff	49C_r1	DLFPSFVRL	9	C53H80N12O13	DLFPSFVRL	DLFPSFVRL	DLFPSFVRL	DLFPSFVRL	0.9757	0.993	#N/A	41.94+/-0.07	#N/A	1092.6	2	547.306	#N/A	41.94	769649	231895	537754	2045	2045	0	#N/A	0.012777	VACV			FALSE
20221007_MS_MRMhr_DC24_VACV_49C_r2.wiff	49C_r2	DLFPSFVRL	9	C53H80N12O13	DLFPSFVRL	DLFPSFVRL	DLFPSFVRL	DLFPSFVRL	0.9813	0.9938	#N/A	41.94+/-0.07	#N/A	1092.6	2	547.306	#N/A	41.94	868914	246346	622567	2555	2555	0	#N/A	0.011278	VACV			FALSE
20221007_MS_MRMhr_DC24_VACV_49C_r3.wiff	49C_r3	DLFPSFVRL	9	C53H80N12O13	DLFPSFVRL	DLFPSFVRL	DLFPSFVRL	DLFPSFVRL	0.9669	0.9927	#N/A	41.94+/-0.07	#N/A	1092.6	2	547.306	#N/A	41.94	348891	105240	243651	0	0	0	#N/A	0.005644	VACV			FALSE
20221007_MS_MRMhr_DC24_VACV_53C_r1.wiff	53C_r1	DLFPSFVRL	9	C53H80N12O13	DLFPSFVRL	DLFPSFVRL	DLFPSFVRL	DLFPSFVRL	0.9589	0.9971	#N/A	41.94+/-0.07	#N/A	1092.6	2	547.306	#N/A	41.94	486980	147457	339523	264	264	0	#N/A	0.00819	VACV			FALSE
20221007_MS_MRMhr_DC24_VACV_53C_r2.wiff	53C_r2	DLFPSFVRL	9	C53H80N12O13	DLFPSFVRL	DLFPSFVRL	DLFPSFVRL	DLFPSFVRL	0.6868	0.9487	#N/A	41.94+/-0.07	#N/A	1092.6	2	547.306	#N/A	41.94	24783	9522	15261	0	0	0	#N/A	0.000579	VACV			FALSE
20221007_MS_MRMhr_DC24_VACV_53C_r3.wiff	53C_r3	DLFPSFVRL	9	C53H80N12O13	DLFPSFVRL	DLFPSFVRL	DLFPSFVRL	DLFPSFVRL	0.9677	0.9934	#N/A	41.94+/-0.07	#N/A	1092.6	2	547.306	#N/A	41.94	236831	77431	159400	0	0	0	#N/A	0.004312	VACV			FALSE
20221007_MS_MRMhr_DC24_VACV_57C_r1.wiff	57C_r1	DLFPSFVRL	9	C53H80N12O13	DLFPSFVRL	DLFPSFVRL	DLFPSFVRL	DLFPSFVRL	0.8313	0.9225	#N/A	41.94+/-0.07	#N/A	1092.6	2	547.306	#N/A	41.94	48044	23833	24211	0	0	0	#N/A	0.001453	VACV			FALSE
20221007_MS_MRMhr_DC24_VACV_57C_r2.wiff	57C_r2	DLFPSFVRL	9	C53H80N12O13	DLFPSFVRL	DLFPSFVRL	DLFPSFVRL	DLFPSFVRL	0.5644	0.8091	#N/A	41.94+/-0.07	#N/A	1092.6	2	547.306	#N/A	41.94	11893	10628	1265	457	457	0	#N/A	0.000384	VACV			FALSE
20221007_MS_MRMhr_DC24_VACV_57C_r3.wiff	57C_r3	DLFPSFVRL	9	C53H80N12O13	DLFPSFVRL	DLFPSFVRL	DLFPSFVRL	DLFPSFVRL	0.6657	0.8224	#N/A	41.94+/-0.07	#N/A	1092.6	2	547.306	#N/A	41.94	16859	12231	4627	253	253	0	#N/A	0.000639	VACV			FALSE
20221007_MS_MRMhr_DC24_VACV_61C_r1.wiff	61C_r1	DLFPSFVRL	9	C53H80N12O13	DLFPSFVRL	DLFPSFVRL	DLFPSFVRL	DLFPSFVRL	0	0.8175	#N/A	41.94+/-0.07	#N/A	1092.6	2	547.306	#N/A	41.94	12813	12813	0	0	0	0	#N/A	0.000604	VACV			FALSE
20221007_MS_MRMhr_DC24_VACV_61C_r2.wiff	61C_r2	DLFPSFVRL	9	C53H80N12O13	DLFPSFVRL	DLFPSFVRL	DLFPSFVRL	DLFPSFVRL	0.5644	0.7477	#N/A	41.94+/-0.07	#N/A	1092.6	2	547.306	#N/A	41.94	9503	8893	610	0	0	0	#N/A	0.000456	VACV			FALSE
20221007_MS_MRMhr_DC24_VACV_61C_r3.wiff	61C_r3	DLFPSFVRL	9	C53H80N12O13	DLFPSFVRL	DLFPSFVRL	DLFPSFVRL	DLFPSFVRL	0	0.786	#N/A	41.94+/-0.07	#N/A	1092.6	2	547.306	#N/A	41.94	14382	14382	0	0	0	0	#N/A	0.000617	VACV			FALSE
20221007_MS_MRMhr_DC24_VACV_65C_r1.wiff	65C_r1	DLFPSFVRL	9	C53H80N12O13	DLFPSFVRL	DLFPSFVRL	DLFPSFVRL	DLFPSFVRL	0.2079	0.8099	#N/A	41.94+/-0.07	#N/A	1092.6	2	547.306	#N/A	41.94	10677	10404	273	0	0	0	#N/A	âˆž	VACV			FALSE
20221007_MS_MRMhr_DC24_VACV_65C_r2.wiff	65C_r2	DLFPSFVRL	9	C53H80N12O13	DLFPSFVRL	DLFPSFVRL	DLFPSFVRL	DLFPSFVRL	0	0.9367	#N/A	41.94+/-0.07	#N/A	1092.6	2	547.306	#N/A	41.94	4300	4300	0	0	0	0	#N/A	âˆž	VACV			FALSE
20221007_MS_MRMhr_DC24_VACV_69C_r1.wiff	69C_r1	DLFPSFVRL	9	C53H80N12O13	DLFPSFVRL	DLFPSFVRL	DLFPSFVRL	DLFPSFVRL	0	0.7337	#N/A	41.94+/-0.07	#N/A	1092.6	2	547.306	#N/A	41.94	3397	3397	0	590	590	0	#N/A	âˆž	VACV			FALSE
20221007_MS_MRMhr_DC24_VACV_69C_r2.wiff	69C_r2	DLFPSFVRL	9	C53H80N12O13	DLFPSFVRL	DLFPSFVRL	DLFPSFVRL	DLFPSFVRL	0.6182	0.8258	#N/A	41.94+/-0.07	#N/A	1092.6	2	547.306	#N/A	41.94	11385	7621	3764	0	0	0	#N/A	âˆž	VACV			FALSE
20221007_MS_MRMhr_DC24_VACV_69C_r3.wiff	69C_r3	DLFPSFVRL	9	C53H80N12O13	DLFPSFVRL	DLFPSFVRL	DLFPSFVRL	DLFPSFVRL	0.5644	0.8388	#N/A	41.94+/-0.07	#N/A	1092.6	2	547.306	#N/A	41.94	11653	8280	3372	102	102	0	#N/A	âˆž	VACV			FALSE
20221007_MS_MRMhr_DC24_VACV_73C_r1.wiff	73C_r1	DLFPSFVRL	9	C53H80N12O13	DLFPSFVRL	DLFPSFVRL	DLFPSFVRL	DLFPSFVRL	0.5644	0.692	#N/A	41.94+/-0.07	#N/A	1092.6	2	547.306	#N/A	41.94	1840	1024	816	293	293	0	#N/A	âˆž	VACV			FALSE
20221007_MS_MRMhr_DC24_VACV_73C_r2.wiff	73C_r2	DLFPSFVRL	9	C53H80N12O13	DLFPSFVRL	DLFPSFVRL	DLFPSFVRL	DLFPSFVRL	0.5644	0.7345	#N/A	41.94+/-0.07	#N/A	1092.6	2	547.306	#N/A	41.94	5414	5009	405	0	0	0	#N/A	âˆž	VACV			FALSE
20221007_MS_MRMhr_DC24_VACV_73C_r3.wiff	73C_r3	DLFPSFVRL	9	C53H80N12O13	DLFPSFVRL	DLFPSFVRL	DLFPSFVRL	DLFPSFVRL	0.5842	0.7693	#N/A	41.94+/-0.07	#N/A	1092.6	2	547.306	#N/A	41.94	2390	1901	489	2002	2002	0	#N/A	âˆž	VACV			FALSE
20221010_MS_zenoSWATH_DC24_VACV_37C_r1.wiff	SWATH_r1	YAHINALEYI	10	C57H83N13O16	YAHINALEYI	YAHINALEYI	YAHINALEYI	YAHINALEYI	0.9503	0.998	#N/A	31.98+/-0.04	#N/A	1205.61	2	603.811	#N/A	32.03	9076721	3386928	5689793	76694	21484	55210	#N/A	0.066136	VACV			FALSE
20221010_MS_zenoSWATH_DC24_VACV_37C_r2.wiff	SWATH_r2	YAHINALEYI	10	C57H83N13O16	YAHINALEYI	YAHINALEYI	YAHINALEYI	YAHINALEYI	0.9622	0.9979	#N/A	31.98+/-0.04	#N/A	1205.61	2	603.811	#N/A	32.03	6194033	2202428	3991605	36226	10582	25644	#N/A	0.064178	VACV			FALSE
20221010_MS_zenoSWATH_DC24_VACV_37C_r3.wiff	SWATH_r3	YAHINALEYI	10	C57H83N13O16	YAHINALEYI	YAHINALEYI	YAHINALEYI	YAHINALEYI	0.9627	0.9976	#N/A	31.98+/-0.04	#N/A	1205.61	2	603.811	#N/A	32.03	7691282	2771800	4919483	36511	11950	24561	#N/A	0.067379	VACV			FALSE
20221007_MS_MRMhr_DC24_VACV_37C_r1.wiff	37C_r1	YAHINALEYI	10	C57H83N13O16	YAHINALEYI	YAHINALEYI	YAHINALEYI	YAHINALEYI	0.9627	0.9985	#N/A	31.98+/-0.04	#N/A	1205.61	2	603.811	#N/A	32.03	10678984	5594182	5084803	24653	18734	5920	#N/A	0.090155	VACV			FALSE
20221007_MS_MRMhr_DC24_VACV_37C_r2.wiff	37C_r2	YAHINALEYI	10	C57H83N13O16	YAHINALEYI	YAHINALEYI	YAHINALEYI	YAHINALEYI	0.9696	0.9988	#N/A	31.98+/-0.04	#N/A	1205.61	2	603.811	#N/A	32.03	10044415	5173060	4871356	14591	14591	0	#N/A	0.083885	VACV			FALSE
20221007_MS_MRMhr_DC24_VACV_37C_r3.wiff	37C_r3	YAHINALEYI	10	C57H83N13O16	YAHINALEYI	YAHINALEYI	YAHINALEYI	YAHINALEYI	0.9674	0.9989	#N/A	31.98+/-0.04	#N/A	1205.61	2	603.811	#N/A	32.03	8950089	4454301	4495790	23366	16792	6573	#N/A	0.089735	VACV			FALSE
20221007_MS_MRMhr_DC24_VACV_41C_r1.wiff	41C_r1	YAHINALEYI	10	C57H83N13O16	YAHINALEYI	YAHINALEYI	YAHINALEYI	YAHINALEYI	0.9683	0.9964	#N/A	31.98+/-0.04	#N/A	1205.61	2	603.811	#N/A	32.03	3736534	1930330	1806204	26217	9465	16752	#N/A	0.052656	VACV			FALSE
20221007_MS_MRMhr_DC24_VACV_41C_r2.wiff	41C_r2	YAHINALEYI	10	C57H83N13O16	YAHINALEYI	YAHINALEYI	YAHINALEYI	YAHINALEYI	0.9751	0.9978	#N/A	31.98+/-0.04	#N/A	1205.61	2	603.811	#N/A	32.03	9321292	4843406	4477887	22713	16713	6000	#N/A	0.082192	VACV			FALSE
20221007_MS_MRMhr_DC24_VACV_41C_r3.wiff	41C_r3	YAHINALEYI	10	C57H83N13O16	YAHINALEYI	YAHINALEYI	YAHINALEYI	YAHINALEYI	0.9632	0.9978	#N/A	31.98+/-0.04	#N/A	1205.61	2	603.811	#N/A	32.03	12021700	6104570	5917130	28709	18686	10023	#N/A	0.093289	VACV			FALSE
20221007_MS_MRMhr_DC24_VACV_45C_r1.wiff	45C_r1	YAHINALEYI	10	C57H83N13O16	YAHINALEYI	YAHINALEYI	YAHINALEYI	YAHINALEYI	0.9557	0.9984	#N/A	31.98+/-0.04	#N/A	1205.61	2	603.811	#N/A	32.03	8230545	4261319	3969225	12486	12486	0	#N/A	0.085898	VACV			FALSE
20221007_MS_MRMhr_DC24_VACV_45C_r2.wiff	45C_r2	YAHINALEYI	10	C57H83N13O16	YAHINALEYI	YAHINALEYI	YAHINALEYI	YAHINALEYI	0.9767	0.9973	#N/A	31.98+/-0.04	#N/A	1205.61	2	603.811	#N/A	32.03	8801037	4873928	3927109	11540	11540	0	#N/A	0.086205	VACV			FALSE
20221007_MS_MRMhr_DC24_VACV_45C_r3.wiff	45C_r3	YAHINALEYI	10	C57H83N13O16	YAHINALEYI	YAHINALEYI	YAHINALEYI	YAHINALEYI	0.975	0.9988	#N/A	31.98+/-0.04	#N/A	1205.61	2	603.811	#N/A	32.03	10060486	5259752	4800736	22071	15717	6354	#N/A	0.0912	VACV			FALSE
20221007_MS_MRMhr_DC24_VACV_49C_r1.wiff	49C_r1	YAHINALEYI	10	C57H83N13O16	YAHINALEYI	YAHINALEYI	YAHINALEYI	YAHINALEYI	0.9654	0.9998	#N/A	31.98+/-0.04	#N/A	1205.61	2	603.811	#N/A	32.03	3299038	1707058	1591980	5922	5922	0	#N/A	0.054767	VACV			FALSE
20221007_MS_MRMhr_DC24_VACV_49C_r2.wiff	49C_r2	YAHINALEYI	10	C57H83N13O16	YAHINALEYI	YAHINALEYI	YAHINALEYI	YAHINALEYI	0.96	0.9978	#N/A	31.98+/-0.04	#N/A	1205.61	2	603.811	#N/A	32.03	7416505	3836809	3579696	10209	10209	0	#N/A	0.096261	VACV			FALSE
20221007_MS_MRMhr_DC24_VACV_49C_r3.wiff	49C_r3	YAHINALEYI	10	C57H83N13O16	YAHINALEYI	YAHINALEYI	YAHINALEYI	YAHINALEYI	0.9625	0.9969	#N/A	31.98+/-0.04	#N/A	1205.61	2	603.811	#N/A	32.03	4517300	2262769	2254530	7579	7579	0	#N/A	0.07307	VACV			FALSE
20221007_MS_MRMhr_DC24_VACV_53C_r1.wiff	53C_r1	YAHINALEYI	10	C57H83N13O16	YAHINALEYI	YAHINALEYI	YAHINALEYI	YAHINALEYI	0.9672	0.9978	#N/A	31.98+/-0.04	#N/A	1205.61	2	603.811	#N/A	32.03	8058549	4174702	3883848	9442	9442	0	#N/A	0.135536	VACV			FALSE
20221007_MS_MRMhr_DC24_VACV_53C_r2.wiff	53C_r2	YAHINALEYI	10	C57H83N13O16	YAHINALEYI	YAHINALEYI	YAHINALEYI	YAHINALEYI	0.9775	0.9973	#N/A	31.98+/-0.04	#N/A	1205.61	2	603.811	#N/A	32.03	1777196	881725	895472	4452	4452	0	#N/A	0.041505	VACV			FALSE
20221007_MS_MRMhr_DC24_VACV_53C_r3.wiff	53C_r3	YAHINALEYI	10	C57H83N13O16	YAHINALEYI	YAHINALEYI	YAHINALEYI	YAHINALEYI	0.9639	0.9987	#N/A	31.98+/-0.04	#N/A	1205.61	2	603.811	#N/A	32.03	5837106	2969312	2867794	9859	9859	0	#N/A	0.106278	VACV			FALSE
20221007_MS_MRMhr_DC24_VACV_57C_r1.wiff	57C_r1	YAHINALEYI	10	C57H83N13O16	YAHINALEYI	YAHINALEYI	YAHINALEYI	YAHINALEYI	0.9596	0.9991	#N/A	31.98+/-0.04	#N/A	1205.61	2	603.811	#N/A	32.03	4243718	2197401	2046318	13565	12812	753	#N/A	0.128361	VACV			FALSE
20221007_MS_MRMhr_DC24_VACV_57C_r2.wiff	57C_r2	YAHINALEYI	10	C57H83N13O16	YAHINALEYI	YAHINALEYI	YAHINALEYI	YAHINALEYI	0.9861	0.9964	#N/A	31.98+/-0.04	#N/A	1205.61	2	603.811	#N/A	32.03	4050501	2092877	1957623	21510	21510	0	#N/A	0.130903	VACV			FALSE
20221007_MS_MRMhr_DC24_VACV_57C_r3.wiff	57C_r3	YAHINALEYI	10	C57H83N13O16	YAHINALEYI	YAHINALEYI	YAHINALEYI	YAHINALEYI	0.9751	0.9963	#N/A	31.98+/-0.04	#N/A	1205.61	2	603.811	#N/A	32.03	2099260	1067604	1031655	18304	18304	0	#N/A	0.079528	VACV			FALSE
20221007_MS_MRMhr_DC24_VACV_61C_r1.wiff	61C_r1	YAHINALEYI	10	C57H83N13O16	YAHINALEYI	YAHINALEYI	YAHINALEYI	YAHINALEYI	0.9667	0.9922	#N/A	31.98+/-0.04	#N/A	1205.61	2	603.811	#N/A	32.03	687572	335212	352360	31615	31615	0	#N/A	0.032412	VACV			FALSE
20221007_MS_MRMhr_DC24_VACV_61C_r2.wiff	61C_r2	YAHINALEYI	10	C57H83N13O16	YAHINALEYI	YAHINALEYI	YAHINALEYI	YAHINALEYI	0.9479	0.9899	#N/A	31.98+/-0.04	#N/A	1205.61	2	603.811	#N/A	32.03	634999	312583	322415	11548	11548	0	#N/A	0.030442	VACV			FALSE
20221007_MS_MRMhr_DC24_VACV_61C_r3.wiff	61C_r3	YAHINALEYI	10	C57H83N13O16	YAHINALEYI	YAHINALEYI	YAHINALEYI	YAHINALEYI	0.9646	0.9918	#N/A	31.98+/-0.04	#N/A	1205.61	2	603.811	#N/A	32.03	682781	340431	342350	7919	7243	676	#N/A	0.029299	VACV			FALSE
20221007_MS_MRMhr_DC24_VACV_65C_r1.wiff	65C_r1	YAHINALEYI	10	C57H83N13O16	YAHINALEYI	YAHINALEYI	YAHINALEYI	YAHINALEYI	0.6197	0.8286	#N/A	31.98+/-0.04	#N/A	1205.61	2	603.811	#N/A	32.03	15358	13836	1522	2439	2439	0	#N/A	âˆž	VACV			FALSE
20221007_MS_MRMhr_DC24_VACV_65C_r2.wiff	65C_r2	YAHINALEYI	10	C57H83N13O16	YAHINALEYI	YAHINALEYI	YAHINALEYI	YAHINALEYI	0	0.8063	#N/A	31.98+/-0.04	#N/A	1205.61	2	603.811	#N/A	32.03	5310	5310	0	2420	2420	0	#N/A	âˆž	VACV			FALSE
20221007_MS_MRMhr_DC24_VACV_69C_r1.wiff	69C_r1	YAHINALEYI	10	C57H83N13O16	YAHINALEYI	YAHINALEYI	YAHINALEYI	YAHINALEYI	0.6705	0.6881	#N/A	31.98+/-0.04	#N/A	1205.61	2	603.811	#N/A	32.03	13895	12775	1120	7745	7745	0	#N/A	âˆž	VACV			FALSE
20221007_MS_MRMhr_DC24_VACV_69C_r2.wiff	69C_r2	YAHINALEYI	10	C57H83N13O16	YAHINALEYI	YAHINALEYI	YAHINALEYI	YAHINALEYI	0.8879	0.8495	#N/A	31.98+/-0.04	#N/A	1205.61	2	603.811	#N/A	32.03	35017	24891	10126	11559	11559	0	#N/A	âˆž	VACV			FALSE
20221007_MS_MRMhr_DC24_VACV_69C_r3.wiff	69C_r3	YAHINALEYI	10	C57H83N13O16	YAHINALEYI	YAHINALEYI	YAHINALEYI	YAHINALEYI	0.769	0.9065	#N/A	31.98+/-0.04	#N/A	1205.61	2	603.811	#N/A	32.03	33105	22252	10852	10069	10069	0	#N/A	âˆž	VACV			FALSE
20221007_MS_MRMhr_DC24_VACV_73C_r1.wiff	73C_r1	YAHINALEYI	10	C57H83N13O16	YAHINALEYI	YAHINALEYI	YAHINALEYI	YAHINALEYI	0.626	0.791	#N/A	31.98+/-0.04	#N/A	1205.61	2	603.811	#N/A	32.03	12693	10771	1921	3535	3535	0	#N/A	âˆž	VACV			FALSE
20221007_MS_MRMhr_DC24_VACV_73C_r2.wiff	73C_r2	YAHINALEYI	10	C57H83N13O16	YAHINALEYI	YAHINALEYI	YAHINALEYI	YAHINALEYI	0.889	0.7083	#N/A	31.98+/-0.04	#N/A	1205.61	2	603.811	#N/A	32.03	50856	43550	7306	161	161	0	#N/A	âˆž	VACV			FALSE
20221007_MS_MRMhr_DC24_VACV_73C_r3.wiff	73C_r3	YAHINALEYI	10	C57H83N13O16	YAHINALEYI	YAHINALEYI	YAHINALEYI	YAHINALEYI	0.815	0.7127	#N/A	31.98+/-0.04	#N/A	1205.61	2	603.811	#N/A	32.03	32440	23186	9254	4367	4367	0	#N/A	âˆž	VACV			FALSE
20221010_MS_zenoSWATH_DC24_VACV_37C_r1.wiff	SWATH_r1	YAHINALEYI	10	C57H82N12O17	YAHIN[+1]ALEYI	YAHIN(unimod:7)ALEYI	YAHIN[Dea]ALEYI	YAHIN[Deamidated (NQ)]ALEYI	0.5444	0.8917	#N/A	32.07+/-0.37	#N/A	1206.59	2	604.303	#N/A	32.03	2597343	1790706	806637	17150	7537	9613	#N/A	0.018925	VACV			FALSE
20221010_MS_zenoSWATH_DC24_VACV_37C_r2.wiff	SWATH_r2	YAHINALEYI	10	C57H82N12O17	YAHIN[+1]ALEYI	YAHIN(unimod:7)ALEYI	YAHIN[Dea]ALEYI	YAHIN[Deamidated (NQ)]ALEYI	0.5019	0.8918	#N/A	32.07+/-0.37	#N/A	1206.59	2	604.303	#N/A	32.03	1659518	1161900	497618	6735	3611	3124	#N/A	0.017195	VACV			FALSE
20221010_MS_zenoSWATH_DC24_VACV_37C_r3.wiff	SWATH_r3	YAHINALEYI	10	C57H82N12O17	YAHIN[+1]ALEYI	YAHIN(unimod:7)ALEYI	YAHIN[Dea]ALEYI	YAHIN[Deamidated (NQ)]ALEYI	0.608	0.8924	#N/A	32.07+/-0.37	#N/A	1206.59	2	604.303	#N/A	32.03	2379265	1453950	925314	9254	8545	709	#N/A	0.020843	VACV			FALSE
20221007_MS_MRMhr_DC24_VACV_37C_r1.wiff	37C_r1	YAHINALEYI	10	C57H82N12O17	YAHIN[+1]ALEYI	YAHIN(unimod:7)ALEYI	YAHIN[Dea]ALEYI	YAHIN[Deamidated (NQ)]ALEYI	0	0.8919	#N/A	32.07+/-0.37	#N/A	1206.59	2	604.303	#N/A	32.03	2947645	2947645	#N/A	15167	15167	#N/A	#N/A	0.024885	VACV			FALSE
20221007_MS_MRMhr_DC24_VACV_37C_r2.wiff	37C_r2	YAHINALEYI	10	C57H82N12O17	YAHIN[+1]ALEYI	YAHIN(unimod:7)ALEYI	YAHIN[Dea]ALEYI	YAHIN[Deamidated (NQ)]ALEYI	0	0.8946	#N/A	32.07+/-0.37	#N/A	1206.59	2	604.303	#N/A	32.03	2727287	2727287	#N/A	10208	10208	#N/A	#N/A	0.022777	VACV			FALSE
20221007_MS_MRMhr_DC24_VACV_37C_r3.wiff	37C_r3	YAHINALEYI	10	C57H82N12O17	YAHIN[+1]ALEYI	YAHIN(unimod:7)ALEYI	YAHIN[Dea]ALEYI	YAHIN[Deamidated (NQ)]ALEYI	0	0.8934	#N/A	32.07+/-0.37	#N/A	1206.59	2	604.303	#N/A	32.03	2351615	2351615	#N/A	7653	7653	#N/A	#N/A	0.023578	VACV			FALSE
20221007_MS_MRMhr_DC24_VACV_41C_r1.wiff	41C_r1	YAHINALEYI	10	C57H82N12O17	YAHIN[+1]ALEYI	YAHIN(unimod:7)ALEYI	YAHIN[Dea]ALEYI	YAHIN[Deamidated (NQ)]ALEYI	0	0.8917	#N/A	32.07+/-0.37	#N/A	1206.59	2	604.303	#N/A	32.03	1009166	1009166	#N/A	6700	6700	#N/A	#N/A	0.014221	VACV			FALSE
20221007_MS_MRMhr_DC24_VACV_41C_r2.wiff	41C_r2	YAHINALEYI	10	C57H82N12O17	YAHIN[+1]ALEYI	YAHIN(unimod:7)ALEYI	YAHIN[Dea]ALEYI	YAHIN[Deamidated (NQ)]ALEYI	0	0.8917	#N/A	32.07+/-0.37	#N/A	1206.59	2	604.303	#N/A	32.03	2551615	2551615	#N/A	6023	6023	#N/A	#N/A	0.022499	VACV			FALSE
20221007_MS_MRMhr_DC24_VACV_41C_r3.wiff	41C_r3	YAHINALEYI	10	C57H82N12O17	YAHIN[+1]ALEYI	YAHIN(unimod:7)ALEYI	YAHIN[Dea]ALEYI	YAHIN[Deamidated (NQ)]ALEYI	0	0.8911	#N/A	32.07+/-0.37	#N/A	1206.59	2	604.303	#N/A	32.03	3225666	3225666	#N/A	12196	12196	#N/A	#N/A	0.025031	VACV			FALSE
20221007_MS_MRMhr_DC24_VACV_45C_r1.wiff	45C_r1	YAHINALEYI	10	C57H82N12O17	YAHIN[+1]ALEYI	YAHIN(unimod:7)ALEYI	YAHIN[Dea]ALEYI	YAHIN[Deamidated (NQ)]ALEYI	0	0.8924	#N/A	32.07+/-0.37	#N/A	1206.59	2	604.303	#N/A	32.03	2247820	2247820	#N/A	6070	6070	#N/A	#N/A	0.023459	VACV			FALSE
20221007_MS_MRMhr_DC24_VACV_45C_r2.wiff	45C_r2	YAHINALEYI	10	C57H82N12O17	YAHIN[+1]ALEYI	YAHIN(unimod:7)ALEYI	YAHIN[Dea]ALEYI	YAHIN[Deamidated (NQ)]ALEYI	0	0.8919	#N/A	32.07+/-0.37	#N/A	1206.59	2	604.303	#N/A	32.03	2572518	2572518	#N/A	3828	3828	#N/A	#N/A	0.025198	VACV			FALSE
20221007_MS_MRMhr_DC24_VACV_45C_r3.wiff	45C_r3	YAHINALEYI	10	C57H82N12O17	YAHIN[+1]ALEYI	YAHIN(unimod:7)ALEYI	YAHIN[Dea]ALEYI	YAHIN[Deamidated (NQ)]ALEYI	0	0.8934	#N/A	32.07+/-0.37	#N/A	1206.59	2	604.303	#N/A	32.03	2776601	2776601	#N/A	7342	7342	#N/A	#N/A	0.02517	VACV			FALSE
20221007_MS_MRMhr_DC24_VACV_49C_r1.wiff	49C_r1	YAHINALEYI	10	C57H82N12O17	YAHIN[+1]ALEYI	YAHIN(unimod:7)ALEYI	YAHIN[Dea]ALEYI	YAHIN[Deamidated (NQ)]ALEYI	0	0.8938	#N/A	32.07+/-0.37	#N/A	1206.59	2	604.303	#N/A	32.03	899223	899223	#N/A	5325	5325	#N/A	#N/A	0.014928	VACV			FALSE
20221007_MS_MRMhr_DC24_VACV_49C_r2.wiff	49C_r2	YAHINALEYI	10	C57H82N12O17	YAHIN[+1]ALEYI	YAHIN(unimod:7)ALEYI	YAHIN[Dea]ALEYI	YAHIN[Deamidated (NQ)]ALEYI	0	0.8929	#N/A	32.07+/-0.37	#N/A	1206.59	2	604.303	#N/A	32.03	2020855	2020855	#N/A	7160	7160	#N/A	#N/A	0.026229	VACV			FALSE
20221007_MS_MRMhr_DC24_VACV_49C_r3.wiff	49C_r3	YAHINALEYI	10	C57H82N12O17	YAHIN[+1]ALEYI	YAHIN(unimod:7)ALEYI	YAHIN[Dea]ALEYI	YAHIN[Deamidated (NQ)]ALEYI	0	0.8926	#N/A	32.07+/-0.37	#N/A	1206.59	2	604.303	#N/A	32.03	1196328	1196328	#N/A	1925	1925	#N/A	#N/A	0.019351	VACV			FALSE
20221007_MS_MRMhr_DC24_VACV_53C_r1.wiff	53C_r1	YAHINALEYI	10	C57H82N12O17	YAHIN[+1]ALEYI	YAHIN(unimod:7)ALEYI	YAHIN[Dea]ALEYI	YAHIN[Deamidated (NQ)]ALEYI	0	0.8897	#N/A	32.07+/-0.37	#N/A	1206.59	2	604.303	#N/A	32.03	2198890	2198890	#N/A	6936	6936	#N/A	#N/A	0.036983	VACV			FALSE
20221007_MS_MRMhr_DC24_VACV_53C_r2.wiff	53C_r2	YAHINALEYI	10	C57H82N12O17	YAHIN[+1]ALEYI	YAHIN(unimod:7)ALEYI	YAHIN[Dea]ALEYI	YAHIN[Deamidated (NQ)]ALEYI	0	0.8946	#N/A	32.07+/-0.37	#N/A	1206.59	2	604.303	#N/A	32.03	462038	462038	#N/A	4903	4903	#N/A	#N/A	0.010791	VACV			FALSE
20221007_MS_MRMhr_DC24_VACV_53C_r3.wiff	53C_r3	YAHINALEYI	10	C57H82N12O17	YAHIN[+1]ALEYI	YAHIN(unimod:7)ALEYI	YAHIN[Dea]ALEYI	YAHIN[Deamidated (NQ)]ALEYI	0	0.8923	#N/A	32.07+/-0.37	#N/A	1206.59	2	604.303	#N/A	32.03	1566359	1566359	#N/A	7330	7330	#N/A	#N/A	0.028519	VACV			FALSE
20221007_MS_MRMhr_DC24_VACV_57C_r1.wiff	57C_r1	YAHINALEYI	10	C57H82N12O17	YAHIN[+1]ALEYI	YAHIN(unimod:7)ALEYI	YAHIN[Dea]ALEYI	YAHIN[Deamidated (NQ)]ALEYI	0	0.8991	#N/A	32.07+/-0.37	#N/A	1206.59	2	604.303	#N/A	32.03	1152810	1152810	#N/A	20465	20465	#N/A	#N/A	0.034869	VACV			FALSE
20221007_MS_MRMhr_DC24_VACV_57C_r2.wiff	57C_r2	YAHINALEYI	10	C57H82N12O17	YAHIN[+1]ALEYI	YAHIN(unimod:7)ALEYI	YAHIN[Dea]ALEYI	YAHIN[Deamidated (NQ)]ALEYI	0	0.8947	#N/A	32.07+/-0.37	#N/A	1206.59	2	604.303	#N/A	32.03	1117784	1117784	#N/A	4561	4561	#N/A	#N/A	0.036124	VACV			FALSE
20221007_MS_MRMhr_DC24_VACV_57C_r3.wiff	57C_r3	YAHINALEYI	10	C57H82N12O17	YAHIN[+1]ALEYI	YAHIN(unimod:7)ALEYI	YAHIN[Dea]ALEYI	YAHIN[Deamidated (NQ)]ALEYI	0	0.9021	#N/A	32.07+/-0.37	#N/A	1206.59	2	604.303	#N/A	32.03	572958	572958	#N/A	4469	4469	#N/A	#N/A	0.021706	VACV			FALSE
20221007_MS_MRMhr_DC24_VACV_61C_r1.wiff	61C_r1	YAHINALEYI	10	C57H82N12O17	YAHIN[+1]ALEYI	YAHIN(unimod:7)ALEYI	YAHIN[Dea]ALEYI	YAHIN[Deamidated (NQ)]ALEYI	0	0.9298	#N/A	32.07+/-0.37	#N/A	1206.59	2	604.303	#N/A	32.03	206776	206776	#N/A	0	0	#N/A	#N/A	0.009747	VACV			FALSE
20221007_MS_MRMhr_DC24_VACV_61C_r2.wiff	61C_r2	YAHINALEYI	10	C57H82N12O17	YAHIN[+1]ALEYI	YAHIN(unimod:7)ALEYI	YAHIN[Dea]ALEYI	YAHIN[Deamidated (NQ)]ALEYI	0	0.9103	#N/A	32.07+/-0.37	#N/A	1206.59	2	604.303	#N/A	32.03	169004	169004	#N/A	14132	14132	#N/A	#N/A	0.008102	VACV			FALSE
20221007_MS_MRMhr_DC24_VACV_61C_r3.wiff	61C_r3	YAHINALEYI	10	C57H82N12O17	YAHIN[+1]ALEYI	YAHIN(unimod:7)ALEYI	YAHIN[Dea]ALEYI	YAHIN[Deamidated (NQ)]ALEYI	0	0.94	#N/A	32.07+/-0.37	#N/A	1206.59	2	604.303	#N/A	32.03	186123	186123	#N/A	10627	10627	#N/A	#N/A	0.007987	VACV			FALSE
20221007_MS_MRMhr_DC24_VACV_65C_r1.wiff	65C_r1	YAHINALEYI	10	C57H82N12O17	YAHIN[+1]ALEYI	YAHIN(unimod:7)ALEYI	YAHIN[Dea]ALEYI	YAHIN[Deamidated (NQ)]ALEYI	0	0.8456	#N/A	32.07+/-0.37	#N/A	1206.59	2	604.303	#N/A	32.03	11224	11224	#N/A	0	0	#N/A	#N/A	âˆž	VACV			FALSE
20221007_MS_MRMhr_DC24_VACV_65C_r2.wiff	65C_r2	YAHINALEYI	10	C57H82N12O17	YAHIN[+1]ALEYI	YAHIN(unimod:7)ALEYI	YAHIN[Dea]ALEYI	YAHIN[Deamidated (NQ)]ALEYI	0	0.7194	#N/A	32.07+/-0.37	#N/A	1206.59	2	604.303	#N/A	32.03	4959	4959	#N/A	914	914	#N/A	#N/A	âˆž	VACV			FALSE
20221007_MS_MRMhr_DC24_VACV_69C_r1.wiff	69C_r1	YAHINALEYI	10	C57H82N12O17	YAHIN[+1]ALEYI	YAHIN(unimod:7)ALEYI	YAHIN[Dea]ALEYI	YAHIN[Deamidated (NQ)]ALEYI	0	0.7358	#N/A	32.07+/-0.37	#N/A	1206.59	2	604.303	#N/A	32.03	14973	14973	#N/A	0	0	#N/A	#N/A	âˆž	VACV			FALSE
20221007_MS_MRMhr_DC24_VACV_69C_r2.wiff	69C_r2	YAHINALEYI	10	C57H82N12O17	YAHIN[+1]ALEYI	YAHIN(unimod:7)ALEYI	YAHIN[Dea]ALEYI	YAHIN[Deamidated (NQ)]ALEYI	0	0.743	#N/A	32.07+/-0.37	#N/A	1206.59	2	604.303	#N/A	32.03	16139	16139	#N/A	4516	4516	#N/A	#N/A	âˆž	VACV			FALSE
20221007_MS_MRMhr_DC24_VACV_69C_r3.wiff	69C_r3	YAHINALEYI	10	C57H82N12O17	YAHIN[+1]ALEYI	YAHIN(unimod:7)ALEYI	YAHIN[Dea]ALEYI	YAHIN[Deamidated (NQ)]ALEYI	0	0.7744	#N/A	32.07+/-0.37	#N/A	1206.59	2	604.303	#N/A	32.03	13446	13446	#N/A	3499	3499	#N/A	#N/A	âˆž	VACV			FALSE
20221007_MS_MRMhr_DC24_VACV_73C_r1.wiff	73C_r1	YAHINALEYI	10	C57H82N12O17	YAHIN[+1]ALEYI	YAHIN(unimod:7)ALEYI	YAHIN[Dea]ALEYI	YAHIN[Deamidated (NQ)]ALEYI	0	0.8379	#N/A	32.07+/-0.37	#N/A	1206.59	2	604.303	#N/A	32.03	13019	13019	#N/A	0	0	#N/A	#N/A	âˆž	VACV			FALSE
20221007_MS_MRMhr_DC24_VACV_73C_r2.wiff	73C_r2	YAHINALEYI	10	C57H82N12O17	YAHIN[+1]ALEYI	YAHIN(unimod:7)ALEYI	YAHIN[Dea]ALEYI	YAHIN[Deamidated (NQ)]ALEYI	0	0.5891	#N/A	32.07+/-0.37	#N/A	1206.59	2	604.303	#N/A	32.03	16835	16835	#N/A	0	0	#N/A	#N/A	âˆž	VACV			FALSE
20221007_MS_MRMhr_DC24_VACV_73C_r3.wiff	73C_r3	YAHINALEYI	10	C57H82N12O17	YAHIN[+1]ALEYI	YAHIN(unimod:7)ALEYI	YAHIN[Dea]ALEYI	YAHIN[Deamidated (NQ)]ALEYI	0	0.6343	#N/A	32.07+/-0.37	#N/A	1206.59	2	604.303	#N/A	32.03	36354	36354	#N/A	0	0	#N/A	#N/A	âˆž	VACV			FALSE
20221010_MS_zenoSWATH_DC24_VACV_37C_r1.wiff	SWATH_r1	SDLFPSFVRL	10	C56H85N13O15	SDLFPSFVRL	SDLFPSFVRL	SDLFPSFVRL	SDLFPSFVRL	0.9768	0.9991	#N/A	39.76+/-0.19	#N/A	1179.63	2	590.822	#N/A	39.77	1082443	217434	865009	1792	1792	0	#N/A	0.007887	VACV			FALSE
20221010_MS_zenoSWATH_DC24_VACV_37C_r2.wiff	SWATH_r2	SDLFPSFVRL	10	C56H85N13O15	SDLFPSFVRL	SDLFPSFVRL	SDLFPSFVRL	SDLFPSFVRL	0.9755	0.9868	#N/A	39.76+/-0.19	#N/A	1179.63	2	590.822	#N/A	39.77	696114	133104	563010	164	164	0	#N/A	0.007213	VACV			FALSE
20221010_MS_zenoSWATH_DC24_VACV_37C_r3.wiff	SWATH_r3	SDLFPSFVRL	10	C56H85N13O15	SDLFPSFVRL	SDLFPSFVRL	SDLFPSFVRL	SDLFPSFVRL	0.9705	0.9936	#N/A	39.76+/-0.19	#N/A	1179.63	2	590.822	#N/A	39.77	985018	182949	802069	1316	1316	0	#N/A	0.008629	VACV			FALSE
20221007_MS_MRMhr_DC24_VACV_37C_r1.wiff	37C_r1	SDLFPSFVRL	10	C56H85N13O15	SDLFPSFVRL	SDLFPSFVRL	SDLFPSFVRL	SDLFPSFVRL	0.9797	0.9961	#N/A	39.76+/-0.19	#N/A	1179.63	2	590.822	#N/A	39.77	1040849	366938	673911	6477	5989	488	#N/A	0.008787	VACV			FALSE
20221007_MS_MRMhr_DC24_VACV_37C_r2.wiff	37C_r2	SDLFPSFVRL	10	C56H85N13O15	SDLFPSFVRL	SDLFPSFVRL	SDLFPSFVRL	SDLFPSFVRL	0.9762	0.9956	#N/A	39.76+/-0.19	#N/A	1179.63	2	590.822	#N/A	39.77	874177	317079	557099	3860	3860	0	#N/A	0.007301	VACV			FALSE
20221007_MS_MRMhr_DC24_VACV_37C_r3.wiff	37C_r3	SDLFPSFVRL	10	C56H85N13O15	SDLFPSFVRL	SDLFPSFVRL	SDLFPSFVRL	SDLFPSFVRL	0.9814	0.9991	#N/A	39.76+/-0.19	#N/A	1179.63	2	590.822	#N/A	39.77	836232	281513	554719	0	0	0	#N/A	0.008384	VACV			FALSE
20221007_MS_MRMhr_DC24_VACV_41C_r1.wiff	41C_r1	SDLFPSFVRL	10	C56H85N13O15	SDLFPSFVRL	SDLFPSFVRL	SDLFPSFVRL	SDLFPSFVRL	0.9468	0.9919	#N/A	39.76+/-0.19	#N/A	1179.63	2	590.822	#N/A	39.77	148039	52661	95378	1974	1974	0	#N/A	0.002086	VACV			FALSE
20221007_MS_MRMhr_DC24_VACV_41C_r2.wiff	41C_r2	SDLFPSFVRL	10	C56H85N13O15	SDLFPSFVRL	SDLFPSFVRL	SDLFPSFVRL	SDLFPSFVRL	0.9657	0.9964	#N/A	39.76+/-0.19	#N/A	1179.63	2	590.822	#N/A	39.77	644649	230559	414090	1360	1360	0	#N/A	0.005684	VACV			FALSE
20221007_MS_MRMhr_DC24_VACV_41C_r3.wiff	41C_r3	SDLFPSFVRL	10	C56H85N13O15	SDLFPSFVRL	SDLFPSFVRL	SDLFPSFVRL	SDLFPSFVRL	0.9874	0.9949	#N/A	39.76+/-0.19	#N/A	1179.63	2	590.822	#N/A	39.77	994095	345266	648829	3032	3032	0	#N/A	0.007714	VACV			FALSE
20221007_MS_MRMhr_DC24_VACV_45C_r1.wiff	45C_r1	SDLFPSFVRL	10	C56H85N13O15	SDLFPSFVRL	SDLFPSFVRL	SDLFPSFVRL	SDLFPSFVRL	0.9854	0.9925	#N/A	39.76+/-0.19	#N/A	1179.63	2	590.822	#N/A	39.77	714643	246911	467732	305	305	0	#N/A	0.007458	VACV			FALSE
20221007_MS_MRMhr_DC24_VACV_45C_r2.wiff	45C_r2	SDLFPSFVRL	10	C56H85N13O15	SDLFPSFVRL	SDLFPSFVRL	SDLFPSFVRL	SDLFPSFVRL	0.9709	0.9989	#N/A	39.76+/-0.19	#N/A	1179.63	2	590.822	#N/A	39.77	819752	284039	535713	732	732	0	#N/A	0.008029	VACV			FALSE
20221007_MS_MRMhr_DC24_VACV_45C_r3.wiff	45C_r3	SDLFPSFVRL	10	C56H85N13O15	SDLFPSFVRL	SDLFPSFVRL	SDLFPSFVRL	SDLFPSFVRL	0.971	0.995	#N/A	39.76+/-0.19	#N/A	1179.63	2	590.822	#N/A	39.77	920113	318562	601551	1383	1383	0	#N/A	0.008341	VACV			FALSE
20221007_MS_MRMhr_DC24_VACV_49C_r1.wiff	49C_r1	SDLFPSFVRL	10	C56H85N13O15	SDLFPSFVRL	SDLFPSFVRL	SDLFPSFVRL	SDLFPSFVRL	0.957	0.9966	#N/A	39.76+/-0.19	#N/A	1179.63	2	590.822	#N/A	39.77	400035	138615	261420	1561	1367	194	#N/A	0.006641	VACV			FALSE
20221007_MS_MRMhr_DC24_VACV_49C_r2.wiff	49C_r2	SDLFPSFVRL	10	C56H85N13O15	SDLFPSFVRL	SDLFPSFVRL	SDLFPSFVRL	SDLFPSFVRL	0.9591	0.9971	#N/A	39.76+/-0.19	#N/A	1179.63	2	590.822	#N/A	39.77	606612	204896	401716	2115	2115	0	#N/A	0.007873	VACV			FALSE
20221007_MS_MRMhr_DC24_VACV_49C_r3.wiff	49C_r3	SDLFPSFVRL	10	C56H85N13O15	SDLFPSFVRL	SDLFPSFVRL	SDLFPSFVRL	SDLFPSFVRL	0.9626	0.9966	#N/A	39.76+/-0.19	#N/A	1179.63	2	590.822	#N/A	39.77	291118	96773	194345	1427	1427	0	#N/A	0.004709	VACV			FALSE
20221007_MS_MRMhr_DC24_VACV_53C_r1.wiff	53C_r1	SDLFPSFVRL	10	C56H85N13O15	SDLFPSFVRL	SDLFPSFVRL	SDLFPSFVRL	SDLFPSFVRL	0.968	0.9958	#N/A	39.76+/-0.19	#N/A	1179.63	2	590.822	#N/A	39.77	404451	139246	265205	213	213	0	#N/A	0.006802	VACV			FALSE
20221007_MS_MRMhr_DC24_VACV_53C_r2.wiff	53C_r2	SDLFPSFVRL	10	C56H85N13O15	SDLFPSFVRL	SDLFPSFVRL	SDLFPSFVRL	SDLFPSFVRL	0.7737	0.9751	#N/A	39.76+/-0.19	#N/A	1179.63	2	590.822	#N/A	39.77	32550	12684	19866	1022	1022	0	#N/A	0.00076	VACV			FALSE
20221007_MS_MRMhr_DC24_VACV_53C_r3.wiff	53C_r3	SDLFPSFVRL	10	C56H85N13O15	SDLFPSFVRL	SDLFPSFVRL	SDLFPSFVRL	SDLFPSFVRL	0.9481	0.9947	#N/A	39.76+/-0.19	#N/A	1179.63	2	590.822	#N/A	39.77	291583	97517	194066	229	229	0	#N/A	0.005309	VACV			FALSE
20221007_MS_MRMhr_DC24_VACV_57C_r1.wiff	57C_r1	SDLFPSFVRL	10	C56H85N13O15	SDLFPSFVRL	SDLFPSFVRL	SDLFPSFVRL	SDLFPSFVRL	0.8731	0.9548	#N/A	39.76+/-0.19	#N/A	1179.63	2	590.822	#N/A	39.77	43692	16058	27634	0	0	0	#N/A	0.001322	VACV			FALSE
20221007_MS_MRMhr_DC24_VACV_57C_r2.wiff	57C_r2	SDLFPSFVRL	10	C56H85N13O15	SDLFPSFVRL	SDLFPSFVRL	SDLFPSFVRL	SDLFPSFVRL	0.7489	0.9342	#N/A	39.76+/-0.19	#N/A	1179.63	2	590.822	#N/A	39.77	7805	4554	3252	142	142	0	#N/A	0.000252	VACV			FALSE
20221007_MS_MRMhr_DC24_VACV_57C_r3.wiff	57C_r3	SDLFPSFVRL	10	C56H85N13O15	SDLFPSFVRL	SDLFPSFVRL	SDLFPSFVRL	SDLFPSFVRL	0.828	0.9606	#N/A	39.76+/-0.19	#N/A	1179.63	2	590.822	#N/A	39.77	18421	9350	9072	188	188	0	#N/A	0.000698	VACV			FALSE
20221007_MS_MRMhr_DC24_VACV_61C_r1.wiff	61C_r1	SDLFPSFVRL	10	C56H85N13O15	SDLFPSFVRL	SDLFPSFVRL	SDLFPSFVRL	SDLFPSFVRL	0.6247	0.8537	#N/A	39.76+/-0.19	#N/A	1179.63	2	590.822	#N/A	39.77	5881	3934	1947	766	766	0	#N/A	0.000277	VACV			FALSE
20221007_MS_MRMhr_DC24_VACV_61C_r2.wiff	61C_r2	SDLFPSFVRL	10	C56H85N13O15	SDLFPSFVRL	SDLFPSFVRL	SDLFPSFVRL	SDLFPSFVRL	0	0.7816	#N/A	39.76+/-0.19	#N/A	1179.63	2	590.822	#N/A	39.77	2109	2109	0	0	0	0	#N/A	0.000101	VACV			FALSE
20221007_MS_MRMhr_DC24_VACV_61C_r3.wiff	61C_r3	SDLFPSFVRL	10	C56H85N13O15	SDLFPSFVRL	SDLFPSFVRL	SDLFPSFVRL	SDLFPSFVRL	0.5682	0.8771	#N/A	39.76+/-0.19	#N/A	1179.63	2	590.822	#N/A	39.77	4192	2862	1330	91	91	0	#N/A	0.00018	VACV			FALSE
20221007_MS_MRMhr_DC24_VACV_65C_r1.wiff	65C_r1	SDLFPSFVRL	10	C56H85N13O15	SDLFPSFVRL	SDLFPSFVRL	SDLFPSFVRL	SDLFPSFVRL	0.6788	0.804	#N/A	39.76+/-0.19	#N/A	1179.63	2	590.822	#N/A	39.77	8198	7675	523	882	882	0	#N/A	âˆž	VACV			FALSE
20221007_MS_MRMhr_DC24_VACV_65C_r2.wiff	65C_r2	SDLFPSFVRL	10	C56H85N13O15	SDLFPSFVRL	SDLFPSFVRL	SDLFPSFVRL	SDLFPSFVRL	0	0.9598	#N/A	39.76+/-0.19	#N/A	1179.63	2	590.822	#N/A	39.77	2323	2323	0	0	0	0	#N/A	âˆž	VACV			FALSE
20221007_MS_MRMhr_DC24_VACV_69C_r1.wiff	69C_r1	SDLFPSFVRL	10	C56H85N13O15	SDLFPSFVRL	SDLFPSFVRL	SDLFPSFVRL	SDLFPSFVRL	0.5682	0.808	#N/A	39.76+/-0.19	#N/A	1179.63	2	590.822	#N/A	39.77	12903	12495	408	0	0	0	#N/A	âˆž	VACV			FALSE
20221007_MS_MRMhr_DC24_VACV_69C_r2.wiff	69C_r2	SDLFPSFVRL	10	C56H85N13O15	SDLFPSFVRL	SDLFPSFVRL	SDLFPSFVRL	SDLFPSFVRL	0.5682	0.8331	#N/A	39.76+/-0.19	#N/A	1179.63	2	590.822	#N/A	39.77	9382	8803	579	0	0	0	#N/A	âˆž	VACV			FALSE
20221007_MS_MRMhr_DC24_VACV_69C_r3.wiff	69C_r3	SDLFPSFVRL	10	C56H85N13O15	SDLFPSFVRL	SDLFPSFVRL	SDLFPSFVRL	SDLFPSFVRL	0.6668	0.7428	#N/A	39.76+/-0.19	#N/A	1179.63	2	590.822	#N/A	39.77	10035	9584	451	1544	1544	0	#N/A	âˆž	VACV			FALSE
20221007_MS_MRMhr_DC24_VACV_73C_r1.wiff	73C_r1	SDLFPSFVRL	10	C56H85N13O15	SDLFPSFVRL	SDLFPSFVRL	SDLFPSFVRL	SDLFPSFVRL	0.5675	0.4085	#N/A	39.76+/-0.19	#N/A	1179.63	2	590.822	#N/A	39.77	3541	2584	957	288	288	0	#N/A	âˆž	VACV			FALSE
20221007_MS_MRMhr_DC24_VACV_73C_r2.wiff	73C_r2	SDLFPSFVRL	10	C56H85N13O15	SDLFPSFVRL	SDLFPSFVRL	SDLFPSFVRL	SDLFPSFVRL	0.5838	0.2378	#N/A	39.76+/-0.19	#N/A	1179.63	2	590.822	#N/A	39.77	13494	258	13236	113	0	113	#N/A	âˆž	VACV			FALSE
20221007_MS_MRMhr_DC24_VACV_73C_r3.wiff	73C_r3	SDLFPSFVRL	10	C56H85N13O15	SDLFPSFVRL	SDLFPSFVRL	SDLFPSFVRL	SDLFPSFVRL	0.5692	0.4848	#N/A	39.76+/-0.19	#N/A	1179.63	2	590.822	#N/A	39.77	2289	1636	653	0	0	0	#N/A	âˆž	VACV			FALSE
20221010_MS_zenoSWATH_DC24_VACV_37C_r1.wiff	SWATH_r1	VISDLFPSFVRL	12	C67H105N15O17	VISDLFPSFVRL	VISDLFPSFVRL	VISDLFPSFVRL	VISDLFPSFVRL	0.9668	0.9958	#N/A	44.03+/-0.05	#N/A	1391.78	2	696.898	#N/A	44	825132	228730	596402	2767	1862	905	#N/A	0.006012	VACV			FALSE
20221010_MS_zenoSWATH_DC24_VACV_37C_r2.wiff	SWATH_r2	VISDLFPSFVRL	12	C67H105N15O17	VISDLFPSFVRL	VISDLFPSFVRL	VISDLFPSFVRL	VISDLFPSFVRL	0.9696	0.9938	#N/A	44.03+/-0.05	#N/A	1391.78	2	696.898	#N/A	44	477196	132218	344979	3699	2645	1053	#N/A	0.004944	VACV			FALSE
20221010_MS_zenoSWATH_DC24_VACV_37C_r3.wiff	SWATH_r3	VISDLFPSFVRL	12	C67H105N15O17	VISDLFPSFVRL	VISDLFPSFVRL	VISDLFPSFVRL	VISDLFPSFVRL	0.9601	0.9949	#N/A	44.03+/-0.05	#N/A	1391.78	2	696.898	#N/A	44	648614	183249	465365	270	270	0	#N/A	0.005682	VACV			FALSE
20221007_MS_MRMhr_DC24_VACV_37C_r1.wiff	37C_r1	VISDLFPSFVRL	12	C67H105N15O17	VISDLFPSFVRL	VISDLFPSFVRL	VISDLFPSFVRL	VISDLFPSFVRL	0.9732	0.9976	#N/A	44.03+/-0.05	#N/A	1391.78	2	696.898	#N/A	44	724179	369683	354496	2867	2867	0	#N/A	0.006114	VACV			FALSE
20221007_MS_MRMhr_DC24_VACV_37C_r2.wiff	37C_r2	VISDLFPSFVRL	12	C67H105N15O17	VISDLFPSFVRL	VISDLFPSFVRL	VISDLFPSFVRL	VISDLFPSFVRL	0.9807	0.9973	#N/A	44.03+/-0.05	#N/A	1391.78	2	696.898	#N/A	44	588464	311496	276967	7301	7301	0	#N/A	0.004915	VACV			FALSE
20221007_MS_MRMhr_DC24_VACV_37C_r3.wiff	37C_r3	VISDLFPSFVRL	12	C67H105N15O17	VISDLFPSFVRL	VISDLFPSFVRL	VISDLFPSFVRL	VISDLFPSFVRL	0.9542	0.9968	#N/A	44.03+/-0.05	#N/A	1391.78	2	696.898	#N/A	44	517685	241942	275743	15448	12478	2970	#N/A	0.00519	VACV			FALSE
20221007_MS_MRMhr_DC24_VACV_41C_r1.wiff	41C_r1	VISDLFPSFVRL	12	C67H105N15O17	VISDLFPSFVRL	VISDLFPSFVRL	VISDLFPSFVRL	VISDLFPSFVRL	0.7151	0.9885	#N/A	44.03+/-0.05	#N/A	1391.78	2	696.898	#N/A	44	38298	22168	16130	0	0	0	#N/A	0.00054	VACV			FALSE
20221007_MS_MRMhr_DC24_VACV_41C_r2.wiff	41C_r2	VISDLFPSFVRL	12	C67H105N15O17	VISDLFPSFVRL	VISDLFPSFVRL	VISDLFPSFVRL	VISDLFPSFVRL	0.929	0.9983	#N/A	44.03+/-0.05	#N/A	1391.78	2	696.898	#N/A	44	358298	183922	174376	3174	3174	0	#N/A	0.003159	VACV			FALSE
20221007_MS_MRMhr_DC24_VACV_41C_r3.wiff	41C_r3	VISDLFPSFVRL	12	C67H105N15O17	VISDLFPSFVRL	VISDLFPSFVRL	VISDLFPSFVRL	VISDLFPSFVRL	0.9846	0.9956	#N/A	44.03+/-0.05	#N/A	1391.78	2	696.898	#N/A	44	695102	342236	352865	6200	6200	0	#N/A	0.005394	VACV			FALSE
20221007_MS_MRMhr_DC24_VACV_45C_r1.wiff	45C_r1	VISDLFPSFVRL	12	C67H105N15O17	VISDLFPSFVRL	VISDLFPSFVRL	VISDLFPSFVRL	VISDLFPSFVRL	0.9587	0.9953	#N/A	44.03+/-0.05	#N/A	1391.78	2	696.898	#N/A	44	513969	261832	252137	5377	5377	0	#N/A	0.005364	VACV			FALSE
20221007_MS_MRMhr_DC24_VACV_45C_r2.wiff	45C_r2	VISDLFPSFVRL	12	C67H105N15O17	VISDLFPSFVRL	VISDLFPSFVRL	VISDLFPSFVRL	VISDLFPSFVRL	0.952	0.9987	#N/A	44.03+/-0.05	#N/A	1391.78	2	696.898	#N/A	44	513131	292985	220146	15260	7667	7593	#N/A	0.005026	VACV			FALSE
20221007_MS_MRMhr_DC24_VACV_45C_r3.wiff	45C_r3	VISDLFPSFVRL	12	C67H105N15O17	VISDLFPSFVRL	VISDLFPSFVRL	VISDLFPSFVRL	VISDLFPSFVRL	0.9754	0.9932	#N/A	44.03+/-0.05	#N/A	1391.78	2	696.898	#N/A	44	660659	336956	323703	12081	12081	0	#N/A	0.005989	VACV			FALSE
20221007_MS_MRMhr_DC24_VACV_49C_r1.wiff	49C_r1	VISDLFPSFVRL	12	C67H105N15O17	VISDLFPSFVRL	VISDLFPSFVRL	VISDLFPSFVRL	VISDLFPSFVRL	0.9489	0.9986	#N/A	44.03+/-0.05	#N/A	1391.78	2	696.898	#N/A	44	429894	222838	207056	12300	1521	10780	#N/A	0.007137	VACV			FALSE
20221007_MS_MRMhr_DC24_VACV_49C_r2.wiff	49C_r2	VISDLFPSFVRL	12	C67H105N15O17	VISDLFPSFVRL	VISDLFPSFVRL	VISDLFPSFVRL	VISDLFPSFVRL	0.9639	0.9966	#N/A	44.03+/-0.05	#N/A	1391.78	2	696.898	#N/A	44	467979	250638	217341	6798	6798	0	#N/A	0.006074	VACV			FALSE
20221007_MS_MRMhr_DC24_VACV_49C_r3.wiff	49C_r3	VISDLFPSFVRL	12	C67H105N15O17	VISDLFPSFVRL	VISDLFPSFVRL	VISDLFPSFVRL	VISDLFPSFVRL	0.9306	0.9887	#N/A	44.03+/-0.05	#N/A	1391.78	2	696.898	#N/A	44	131956	73663	58294	3257	3257	0	#N/A	0.002134	VACV			FALSE
20221007_MS_MRMhr_DC24_VACV_53C_r1.wiff	53C_r1	VISDLFPSFVRL	12	C67H105N15O17	VISDLFPSFVRL	VISDLFPSFVRL	VISDLFPSFVRL	VISDLFPSFVRL	0.9465	0.998	#N/A	44.03+/-0.05	#N/A	1391.78	2	696.898	#N/A	44	582984	288977	294007	3959	3959	0	#N/A	0.009805	VACV			FALSE
20221007_MS_MRMhr_DC24_VACV_53C_r2.wiff	53C_r2	VISDLFPSFVRL	12	C67H105N15O17	VISDLFPSFVRL	VISDLFPSFVRL	VISDLFPSFVRL	VISDLFPSFVRL	0.6485	0.9722	#N/A	44.03+/-0.05	#N/A	1391.78	2	696.898	#N/A	44	10584	6194	4390	288	288	0	#N/A	0.000247	VACV			FALSE
20221007_MS_MRMhr_DC24_VACV_53C_r3.wiff	53C_r3	VISDLFPSFVRL	12	C67H105N15O17	VISDLFPSFVRL	VISDLFPSFVRL	VISDLFPSFVRL	VISDLFPSFVRL	0.9583	0.9931	#N/A	44.03+/-0.05	#N/A	1391.78	2	696.898	#N/A	44	267831	125508	142322	12467	3694	8773	#N/A	0.004876	VACV			FALSE
20221007_MS_MRMhr_DC24_VACV_57C_r1.wiff	57C_r1	VISDLFPSFVRL	12	C67H105N15O17	VISDLFPSFVRL	VISDLFPSFVRL	VISDLFPSFVRL	VISDLFPSFVRL	0.8252	0.9571	#N/A	44.03+/-0.05	#N/A	1391.78	2	696.898	#N/A	44	47347	27840	19507	2781	2781	0	#N/A	0.001432	VACV			FALSE
20221007_MS_MRMhr_DC24_VACV_57C_r2.wiff	57C_r2	VISDLFPSFVRL	12	C67H105N15O17	VISDLFPSFVRL	VISDLFPSFVRL	VISDLFPSFVRL	VISDLFPSFVRL	0.5096	0.84	#N/A	44.03+/-0.05	#N/A	1391.78	2	696.898	#N/A	44	13734	6570	7164	2252	2252	0	#N/A	0.000444	VACV			FALSE
20221007_MS_MRMhr_DC24_VACV_57C_r3.wiff	57C_r3	VISDLFPSFVRL	12	C67H105N15O17	VISDLFPSFVRL	VISDLFPSFVRL	VISDLFPSFVRL	VISDLFPSFVRL	0.4549	0.9148	#N/A	44.03+/-0.05	#N/A	1391.78	2	696.898	#N/A	44	17080	14644	2435	0	0	0	#N/A	0.000647	VACV			FALSE
20221007_MS_MRMhr_DC24_VACV_61C_r1.wiff	61C_r1	VISDLFPSFVRL	12	C67H105N15O17	VISDLFPSFVRL	VISDLFPSFVRL	VISDLFPSFVRL	VISDLFPSFVRL	0.4198	0.834	#N/A	44.03+/-0.05	#N/A	1391.78	2	696.898	#N/A	44	15013	12409	2604	750	750	0	#N/A	0.000708	VACV			FALSE
20221007_MS_MRMhr_DC24_VACV_61C_r2.wiff	61C_r2	VISDLFPSFVRL	12	C67H105N15O17	VISDLFPSFVRL	VISDLFPSFVRL	VISDLFPSFVRL	VISDLFPSFVRL	0	0.6409	#N/A	44.03+/-0.05	#N/A	1391.78	2	696.898	#N/A	44	5763	5763	0	717	717	0	#N/A	0.000276	VACV			FALSE
20221007_MS_MRMhr_DC24_VACV_61C_r3.wiff	61C_r3	VISDLFPSFVRL	12	C67H105N15O17	VISDLFPSFVRL	VISDLFPSFVRL	VISDLFPSFVRL	VISDLFPSFVRL	0.4198	0.7053	#N/A	44.03+/-0.05	#N/A	1391.78	2	696.898	#N/A	44	8215	7809	406	1608	1608	0	#N/A	0.000353	VACV			FALSE
20221007_MS_MRMhr_DC24_VACV_65C_r1.wiff	65C_r1	VISDLFPSFVRL	12	C67H105N15O17	VISDLFPSFVRL	VISDLFPSFVRL	VISDLFPSFVRL	VISDLFPSFVRL	0	0.7461	#N/A	44.03+/-0.05	#N/A	1391.78	2	696.898	#N/A	44	9587	9587	0	2065	2065	0	#N/A	âˆž	VACV			FALSE
20221007_MS_MRMhr_DC24_VACV_65C_r2.wiff	65C_r2	VISDLFPSFVRL	12	C67H105N15O17	VISDLFPSFVRL	VISDLFPSFVRL	VISDLFPSFVRL	VISDLFPSFVRL	0	0.6828	#N/A	44.03+/-0.05	#N/A	1391.78	2	696.898	#N/A	44	4335	4335	0	1002	1002	0	#N/A	âˆž	VACV			FALSE
20221007_MS_MRMhr_DC24_VACV_69C_r1.wiff	69C_r1	VISDLFPSFVRL	12	C67H105N15O17	VISDLFPSFVRL	VISDLFPSFVRL	VISDLFPSFVRL	VISDLFPSFVRL	0	0.7235	#N/A	44.03+/-0.05	#N/A	1391.78	2	696.898	#N/A	44	13199	13199	0	665	665	0	#N/A	âˆž	VACV			FALSE
20221007_MS_MRMhr_DC24_VACV_69C_r2.wiff	69C_r2	VISDLFPSFVRL	12	C67H105N15O17	VISDLFPSFVRL	VISDLFPSFVRL	VISDLFPSFVRL	VISDLFPSFVRL	0.2998	0.7655	#N/A	44.03+/-0.05	#N/A	1391.78	2	696.898	#N/A	44	15435	13628	1807	1860	1860	0	#N/A	âˆž	VACV			FALSE
20221007_MS_MRMhr_DC24_VACV_69C_r3.wiff	69C_r3	VISDLFPSFVRL	12	C67H105N15O17	VISDLFPSFVRL	VISDLFPSFVRL	VISDLFPSFVRL	VISDLFPSFVRL	0.549	0.7521	#N/A	44.03+/-0.05	#N/A	1391.78	2	696.898	#N/A	44	8046	6928	1117	2152	2152	0	#N/A	âˆž	VACV			FALSE
20221007_MS_MRMhr_DC24_VACV_73C_r1.wiff	73C_r1	VISDLFPSFVRL	12	C67H105N15O17	VISDLFPSFVRL	VISDLFPSFVRL	VISDLFPSFVRL	VISDLFPSFVRL	0.4391	0.7069	#N/A	44.03+/-0.05	#N/A	1391.78	2	696.898	#N/A	44	13045	12126	919	425	425	0	#N/A	âˆž	VACV			FALSE
20221007_MS_MRMhr_DC24_VACV_73C_r2.wiff	73C_r2	VISDLFPSFVRL	12	C67H105N15O17	VISDLFPSFVRL	VISDLFPSFVRL	VISDLFPSFVRL	VISDLFPSFVRL	0.7479	0.7133	#N/A	44.03+/-0.05	#N/A	1391.78	2	696.898	#N/A	44	33999	28980	5020	0	0	0	#N/A	âˆž	VACV			FALSE
20221007_MS_MRMhr_DC24_VACV_73C_r3.wiff	73C_r3	VISDLFPSFVRL	12	C67H105N15O17	VISDLFPSFVRL	VISDLFPSFVRL	VISDLFPSFVRL	VISDLFPSFVRL	0.4198	0.692	#N/A	44.03+/-0.05	#N/A	1391.78	2	696.898	#N/A	44	25653	25585	69	0	0	0	#N/A	âˆž	VACV			FALSE
20221010_MS_zenoSWATH_DC24_VACV_37C_r1.wiff	SWATH_r1	VISDLFPSFVRL	12	C67H105N15O17	VISDLFPSFVRL	VISDLFPSFVRL	VISDLFPSFVRL	VISDLFPSFVRL	0.9436	0.879	#N/A	43.97+/-0.13	#N/A	1391.78	3	464.934	#N/A	44	95858	15611	80246	0	0	0	#N/A	0.000698	VACV			FALSE
20221010_MS_zenoSWATH_DC24_VACV_37C_r2.wiff	SWATH_r2	VISDLFPSFVRL	12	C67H105N15O17	VISDLFPSFVRL	VISDLFPSFVRL	VISDLFPSFVRL	VISDLFPSFVRL	0.9215	0.8824	#N/A	43.97+/-0.13	#N/A	1391.78	3	464.934	#N/A	44	60424	8079	52345	0	0	0	#N/A	0.000626	VACV			FALSE
20221010_MS_zenoSWATH_DC24_VACV_37C_r3.wiff	SWATH_r3	VISDLFPSFVRL	12	C67H105N15O17	VISDLFPSFVRL	VISDLFPSFVRL	VISDLFPSFVRL	VISDLFPSFVRL	0.9107	0.8693	#N/A	43.97+/-0.13	#N/A	1391.78	3	464.934	#N/A	44	75334	10937	64397	0	0	0	#N/A	0.00066	VACV			FALSE
20221007_MS_MRMhr_DC24_VACV_37C_r1.wiff	37C_r1	VISDLFPSFVRL	12	C67H105N15O17	VISDLFPSFVRL	VISDLFPSFVRL	VISDLFPSFVRL	VISDLFPSFVRL	0.911	0.9124	#N/A	43.97+/-0.13	#N/A	1391.78	3	464.934	#N/A	44	95489	25631	69859	0	0	0	#N/A	0.000806	VACV			FALSE
20221007_MS_MRMhr_DC24_VACV_37C_r2.wiff	37C_r2	VISDLFPSFVRL	12	C67H105N15O17	VISDLFPSFVRL	VISDLFPSFVRL	VISDLFPSFVRL	VISDLFPSFVRL	0.8281	0.8907	#N/A	43.97+/-0.13	#N/A	1391.78	3	464.934	#N/A	44	86324	22971	63352	133	133	0	#N/A	0.000721	VACV			FALSE
20221007_MS_MRMhr_DC24_VACV_37C_r3.wiff	37C_r3	VISDLFPSFVRL	12	C67H105N15O17	VISDLFPSFVRL	VISDLFPSFVRL	VISDLFPSFVRL	VISDLFPSFVRL	0.8136	0.8876	#N/A	43.97+/-0.13	#N/A	1391.78	3	464.934	#N/A	44	50187	17561	32626	394	394	0	#N/A	0.000503	VACV			FALSE
20221007_MS_MRMhr_DC24_VACV_41C_r1.wiff	41C_r1	VISDLFPSFVRL	12	C67H105N15O17	VISDLFPSFVRL	VISDLFPSFVRL	VISDLFPSFVRL	VISDLFPSFVRL	0.2744	0.7368	#N/A	43.97+/-0.13	#N/A	1391.78	3	464.934	#N/A	44	2126	2028	97	293	293	0	#N/A	3e-05	VACV			FALSE
20221007_MS_MRMhr_DC24_VACV_41C_r2.wiff	41C_r2	VISDLFPSFVRL	12	C67H105N15O17	VISDLFPSFVRL	VISDLFPSFVRL	VISDLFPSFVRL	VISDLFPSFVRL	0.8383	0.8659	#N/A	43.97+/-0.13	#N/A	1391.78	3	464.934	#N/A	44	42395	14820	27575	119	119	0	#N/A	0.000374	VACV			FALSE
20221007_MS_MRMhr_DC24_VACV_41C_r3.wiff	41C_r3	VISDLFPSFVRL	12	C67H105N15O17	VISDLFPSFVRL	VISDLFPSFVRL	VISDLFPSFVRL	VISDLFPSFVRL	0.8955	0.8998	#N/A	43.97+/-0.13	#N/A	1391.78	3	464.934	#N/A	44	85192	23081	62112	176	176	0	#N/A	0.000661	VACV			FALSE
20221007_MS_MRMhr_DC24_VACV_45C_r1.wiff	45C_r1	VISDLFPSFVRL	12	C67H105N15O17	VISDLFPSFVRL	VISDLFPSFVRL	VISDLFPSFVRL	VISDLFPSFVRL	0.8369	0.9248	#N/A	43.97+/-0.13	#N/A	1391.78	3	464.934	#N/A	44	60155	17127	43028	0	0	0	#N/A	0.000628	VACV			FALSE
20221007_MS_MRMhr_DC24_VACV_45C_r2.wiff	45C_r2	VISDLFPSFVRL	12	C67H105N15O17	VISDLFPSFVRL	VISDLFPSFVRL	VISDLFPSFVRL	VISDLFPSFVRL	0.9701	0.9188	#N/A	43.97+/-0.13	#N/A	1391.78	3	464.934	#N/A	44	64237	19592	44645	23	23	0	#N/A	0.000629	VACV			FALSE
20221007_MS_MRMhr_DC24_VACV_45C_r3.wiff	45C_r3	VISDLFPSFVRL	12	C67H105N15O17	VISDLFPSFVRL	VISDLFPSFVRL	VISDLFPSFVRL	VISDLFPSFVRL	0.8917	0.8941	#N/A	43.97+/-0.13	#N/A	1391.78	3	464.934	#N/A	44	83482	25195	58288	539	539	0	#N/A	0.000757	VACV			FALSE
20221007_MS_MRMhr_DC24_VACV_49C_r1.wiff	49C_r1	VISDLFPSFVRL	12	C67H105N15O17	VISDLFPSFVRL	VISDLFPSFVRL	VISDLFPSFVRL	VISDLFPSFVRL	0.8342	0.8791	#N/A	43.97+/-0.13	#N/A	1391.78	3	464.934	#N/A	44	60508	15470	45038	222	222	0	#N/A	0.001004	VACV			FALSE
20221007_MS_MRMhr_DC24_VACV_49C_r2.wiff	49C_r2	VISDLFPSFVRL	12	C67H105N15O17	VISDLFPSFVRL	VISDLFPSFVRL	VISDLFPSFVRL	VISDLFPSFVRL	0.8577	0.844	#N/A	43.97+/-0.13	#N/A	1391.78	3	464.934	#N/A	44	57595	20830	36765	266	266	0	#N/A	0.000748	VACV			FALSE
20221007_MS_MRMhr_DC24_VACV_49C_r3.wiff	49C_r3	VISDLFPSFVRL	12	C67H105N15O17	VISDLFPSFVRL	VISDLFPSFVRL	VISDLFPSFVRL	VISDLFPSFVRL	0.6883	0.7816	#N/A	43.97+/-0.13	#N/A	1391.78	3	464.934	#N/A	44	21048	7702	13346	258	258	0	#N/A	0.00034	VACV			FALSE
20221007_MS_MRMhr_DC24_VACV_53C_r1.wiff	53C_r1	VISDLFPSFVRL	12	C67H105N15O17	VISDLFPSFVRL	VISDLFPSFVRL	VISDLFPSFVRL	VISDLFPSFVRL	0.8212	0.9681	#N/A	43.97+/-0.13	#N/A	1391.78	3	464.934	#N/A	44	59445	15904	43541	0	0	0	#N/A	0.001	VACV			FALSE
20221007_MS_MRMhr_DC24_VACV_53C_r2.wiff	53C_r2	VISDLFPSFVRL	12	C67H105N15O17	VISDLFPSFVRL	VISDLFPSFVRL	VISDLFPSFVRL	VISDLFPSFVRL	0.2744	0.6889	#N/A	43.97+/-0.13	#N/A	1391.78	3	464.934	#N/A	44	1809	1399	410	0	0	0	#N/A	4.2e-05	VACV			FALSE
20221007_MS_MRMhr_DC24_VACV_53C_r3.wiff	53C_r3	VISDLFPSFVRL	12	C67H105N15O17	VISDLFPSFVRL	VISDLFPSFVRL	VISDLFPSFVRL	VISDLFPSFVRL	0.7565	0.8203	#N/A	43.97+/-0.13	#N/A	1391.78	3	464.934	#N/A	44	26147	11836	14311	186	186	0	#N/A	0.000476	VACV			FALSE
20221007_MS_MRMhr_DC24_VACV_57C_r1.wiff	57C_r1	VISDLFPSFVRL	12	C67H105N15O17	VISDLFPSFVRL	VISDLFPSFVRL	VISDLFPSFVRL	VISDLFPSFVRL	0.48	0.8175	#N/A	43.97+/-0.13	#N/A	1391.78	3	464.934	#N/A	44	3272	2457	815	0	0	0	#N/A	9.9e-05	VACV			FALSE
20221007_MS_MRMhr_DC24_VACV_57C_r2.wiff	57C_r2	VISDLFPSFVRL	12	C67H105N15O17	VISDLFPSFVRL	VISDLFPSFVRL	VISDLFPSFVRL	VISDLFPSFVRL	0	0.8991	#N/A	43.97+/-0.13	#N/A	1391.78	3	464.934	#N/A	44	1224	1224	0	0	0	0	#N/A	4e-05	VACV			FALSE
20221007_MS_MRMhr_DC24_VACV_57C_r3.wiff	57C_r3	VISDLFPSFVRL	12	C67H105N15O17	VISDLFPSFVRL	VISDLFPSFVRL	VISDLFPSFVRL	VISDLFPSFVRL	0.4079	0.8424	#N/A	43.97+/-0.13	#N/A	1391.78	3	464.934	#N/A	44	1671	1206	464	0	0	0	#N/A	6.3e-05	VACV			FALSE
20221007_MS_MRMhr_DC24_VACV_61C_r1.wiff	61C_r1	VISDLFPSFVRL	12	C67H105N15O17	VISDLFPSFVRL	VISDLFPSFVRL	VISDLFPSFVRL	VISDLFPSFVRL	0	0.7344	#N/A	43.97+/-0.13	#N/A	1391.78	3	464.934	#N/A	44	962	962	0	0	0	0	#N/A	4.5e-05	VACV			FALSE
20221007_MS_MRMhr_DC24_VACV_61C_r2.wiff	61C_r2	VISDLFPSFVRL	12	C67H105N15O17	VISDLFPSFVRL	VISDLFPSFVRL	VISDLFPSFVRL	VISDLFPSFVRL	0	0.4531	#N/A	43.97+/-0.13	#N/A	1391.78	3	464.934	#N/A	44	937	937	0	0	0	0	#N/A	4.5e-05	VACV			FALSE
20221007_MS_MRMhr_DC24_VACV_61C_r3.wiff	61C_r3	VISDLFPSFVRL	12	C67H105N15O17	VISDLFPSFVRL	VISDLFPSFVRL	VISDLFPSFVRL	VISDLFPSFVRL	0	0.64	#N/A	43.97+/-0.13	#N/A	1391.78	3	464.934	#N/A	44	1642	1642	0	0	0	0	#N/A	7e-05	VACV			FALSE
20221007_MS_MRMhr_DC24_VACV_65C_r1.wiff	65C_r1	VISDLFPSFVRL	12	C67H105N15O17	VISDLFPSFVRL	VISDLFPSFVRL	VISDLFPSFVRL	VISDLFPSFVRL	0	0.6008	#N/A	43.97+/-0.13	#N/A	1391.78	3	464.934	#N/A	44	2076	2076	0	0	0	0	#N/A	âˆž	VACV			FALSE
20221007_MS_MRMhr_DC24_VACV_65C_r2.wiff	65C_r2	VISDLFPSFVRL	12	C67H105N15O17	VISDLFPSFVRL	VISDLFPSFVRL	VISDLFPSFVRL	VISDLFPSFVRL	0	0.4562	#N/A	43.97+/-0.13	#N/A	1391.78	3	464.934	#N/A	44	862	862	0	0	0	0	#N/A	âˆž	VACV			FALSE
20221007_MS_MRMhr_DC24_VACV_69C_r1.wiff	69C_r1	VISDLFPSFVRL	12	C67H105N15O17	VISDLFPSFVRL	VISDLFPSFVRL	VISDLFPSFVRL	VISDLFPSFVRL	0	0.3806	#N/A	43.97+/-0.13	#N/A	1391.78	3	464.934	#N/A	44	2304	2304	0	36	36	0	#N/A	âˆž	VACV			FALSE
20221007_MS_MRMhr_DC24_VACV_69C_r2.wiff	69C_r2	VISDLFPSFVRL	12	C67H105N15O17	VISDLFPSFVRL	VISDLFPSFVRL	VISDLFPSFVRL	VISDLFPSFVRL	0	0.4561	#N/A	43.97+/-0.13	#N/A	1391.78	3	464.934	#N/A	44	2543	2543	0	0	0	0	#N/A	âˆž	VACV			FALSE
20221007_MS_MRMhr_DC24_VACV_69C_r3.wiff	69C_r3	VISDLFPSFVRL	12	C67H105N15O17	VISDLFPSFVRL	VISDLFPSFVRL	VISDLFPSFVRL	VISDLFPSFVRL	0	0.3988	#N/A	43.97+/-0.13	#N/A	1391.78	3	464.934	#N/A	44	900	900	0	0	0	0	#N/A	âˆž	VACV			FALSE
20221007_MS_MRMhr_DC24_VACV_73C_r1.wiff	73C_r1	VISDLFPSFVRL	12	C67H105N15O17	VISDLFPSFVRL	VISDLFPSFVRL	VISDLFPSFVRL	VISDLFPSFVRL	0	0.5462	#N/A	43.97+/-0.13	#N/A	1391.78	3	464.934	#N/A	44	1746	1746	0	0	0	0	#N/A	âˆž	VACV			FALSE
20221007_MS_MRMhr_DC24_VACV_73C_r2.wiff	73C_r2	VISDLFPSFVRL	12	C67H105N15O17	VISDLFPSFVRL	VISDLFPSFVRL	VISDLFPSFVRL	VISDLFPSFVRL	0	0.4977	#N/A	43.97+/-0.13	#N/A	1391.78	3	464.934	#N/A	44	4530	4530	0	0	0	0	#N/A	âˆž	VACV			FALSE
20221007_MS_MRMhr_DC24_VACV_73C_r3.wiff	73C_r3	VISDLFPSFVRL	12	C67H105N15O17	VISDLFPSFVRL	VISDLFPSFVRL	VISDLFPSFVRL	VISDLFPSFVRL	0	0.4773	#N/A	43.97+/-0.13	#N/A	1391.78	3	464.934	#N/A	44	4735	4735	0	0	0	0	#N/A	âˆž	VACV			FALSE
20221010_MS_zenoSWATH_DC24_VACV_37C_r1.wiff	SWATH_r1	AAFEFINSL	9	C48H70N10O14	AAFEFINSL	AAFEFINSL	AAFEFINSL	AAFEFINSL	0.7886	0.9971	#N/A	39.99+/-0.09	#N/A	1010.51	2	506.261	#N/A	40.04	1511879	553014	958865	10671	5701	4970	#N/A	0.011016	VACV			FALSE
20221010_MS_zenoSWATH_DC24_VACV_37C_r2.wiff	SWATH_r2	AAFEFINSL	9	C48H70N10O14	AAFEFINSL	AAFEFINSL	AAFEFINSL	AAFEFINSL	0.8207	0.999	#N/A	39.99+/-0.09	#N/A	1010.51	2	506.261	#N/A	40.04	1047276	390071	657205	7810	4732	3078	#N/A	0.010851	VACV			FALSE
20221010_MS_zenoSWATH_DC24_VACV_37C_r3.wiff	SWATH_r3	AAFEFINSL	9	C48H70N10O14	AAFEFINSL	AAFEFINSL	AAFEFINSL	AAFEFINSL	0.8873	0.9914	#N/A	39.99+/-0.09	#N/A	1010.51	2	506.261	#N/A	40.04	1482127	538067	944059	7788	4691	3097	#N/A	0.012984	VACV			FALSE
20221007_MS_MRMhr_DC24_VACV_37C_r1.wiff	37C_r1	AAFEFINSL	9	C48H70N10O14	AAFEFINSL	AAFEFINSL	AAFEFINSL	AAFEFINSL	0.8151	0.9895	#N/A	39.99+/-0.09	#N/A	1010.51	2	506.261	#N/A	40.04	2006661	1053621	953040	5076	5076	0	#N/A	0.016941	VACV			FALSE
20221007_MS_MRMhr_DC24_VACV_37C_r2.wiff	37C_r2	AAFEFINSL	9	C48H70N10O14	AAFEFINSL	AAFEFINSL	AAFEFINSL	AAFEFINSL	0.8591	0.9904	#N/A	39.99+/-0.09	#N/A	1010.51	2	506.261	#N/A	40.04	1990142	1012112	978030	0	0	0	#N/A	0.016621	VACV			FALSE
20221007_MS_MRMhr_DC24_VACV_37C_r3.wiff	37C_r3	AAFEFINSL	9	C48H70N10O14	AAFEFINSL	AAFEFINSL	AAFEFINSL	AAFEFINSL	0.9665	0.9922	#N/A	39.99+/-0.09	#N/A	1010.51	2	506.261	#N/A	40.04	1941745	897493	1044252	4078	4078	0	#N/A	0.019468	VACV			FALSE
20221007_MS_MRMhr_DC24_VACV_41C_r1.wiff	41C_r1	AAFEFINSL	9	C48H70N10O14	AAFEFINSL	AAFEFINSL	AAFEFINSL	AAFEFINSL	0.9291	0.9968	#N/A	39.99+/-0.09	#N/A	1010.51	2	506.261	#N/A	40.04	1061439	519196	542242	1732	1732	0	#N/A	0.014958	VACV			FALSE
20221007_MS_MRMhr_DC24_VACV_41C_r2.wiff	41C_r2	AAFEFINSL	9	C48H70N10O14	AAFEFINSL	AAFEFINSL	AAFEFINSL	AAFEFINSL	0.9499	0.9963	#N/A	39.99+/-0.09	#N/A	1010.51	2	506.261	#N/A	40.04	1847965	885113	962851	3233	3233	0	#N/A	0.016295	VACV			FALSE
20221007_MS_MRMhr_DC24_VACV_41C_r3.wiff	41C_r3	AAFEFINSL	9	C48H70N10O14	AAFEFINSL	AAFEFINSL	AAFEFINSL	AAFEFINSL	0.9563	0.9908	#N/A	39.99+/-0.09	#N/A	1010.51	2	506.261	#N/A	40.04	2098820	1018646	1080175	1548	1548	0	#N/A	0.016287	VACV			FALSE
20221007_MS_MRMhr_DC24_VACV_45C_r1.wiff	45C_r1	AAFEFINSL	9	C48H70N10O14	AAFEFINSL	AAFEFINSL	AAFEFINSL	AAFEFINSL	0.8386	0.9886	#N/A	39.99+/-0.09	#N/A	1010.51	2	506.261	#N/A	40.04	2043475	1122821	920654	1418	1418	0	#N/A	0.021327	VACV			FALSE
20221007_MS_MRMhr_DC24_VACV_45C_r2.wiff	45C_r2	AAFEFINSL	9	C48H70N10O14	AAFEFINSL	AAFEFINSL	AAFEFINSL	AAFEFINSL	0.8788	0.9914	#N/A	39.99+/-0.09	#N/A	1010.51	2	506.261	#N/A	40.04	1902260	961133	941128	205	205	0	#N/A	0.018632	VACV			FALSE
20221007_MS_MRMhr_DC24_VACV_45C_r3.wiff	45C_r3	AAFEFINSL	9	C48H70N10O14	AAFEFINSL	AAFEFINSL	AAFEFINSL	AAFEFINSL	0.8404	0.9902	#N/A	39.99+/-0.09	#N/A	1010.51	2	506.261	#N/A	40.04	1978552	1031628	946924	1821	1821	0	#N/A	0.017936	VACV			FALSE
20221007_MS_MRMhr_DC24_VACV_49C_r1.wiff	49C_r1	AAFEFINSL	9	C48H70N10O14	AAFEFINSL	AAFEFINSL	AAFEFINSL	AAFEFINSL	0.833	0.9911	#N/A	39.99+/-0.09	#N/A	1010.51	2	506.261	#N/A	40.04	1784458	984723	799735	3145	3145	0	#N/A	0.029624	VACV			FALSE
20221007_MS_MRMhr_DC24_VACV_49C_r2.wiff	49C_r2	AAFEFINSL	9	C48H70N10O14	AAFEFINSL	AAFEFINSL	AAFEFINSL	AAFEFINSL	0.9618	0.9939	#N/A	39.99+/-0.09	#N/A	1010.51	2	506.261	#N/A	40.04	1913554	937590	975964	1455	1455	0	#N/A	0.024837	VACV			FALSE
20221007_MS_MRMhr_DC24_VACV_49C_r3.wiff	49C_r3	AAFEFINSL	9	C48H70N10O14	AAFEFINSL	AAFEFINSL	AAFEFINSL	AAFEFINSL	0.9411	0.9963	#N/A	39.99+/-0.09	#N/A	1010.51	2	506.261	#N/A	40.04	1838831	887892	950939	2009	2009	0	#N/A	0.029744	VACV			FALSE
20221007_MS_MRMhr_DC24_VACV_53C_r1.wiff	53C_r1	AAFEFINSL	9	C48H70N10O14	AAFEFINSL	AAFEFINSL	AAFEFINSL	AAFEFINSL	0.8687	0.996	#N/A	39.99+/-0.09	#N/A	1010.51	2	506.261	#N/A	40.04	1107296	601907	505388	101	101	0	#N/A	0.018623	VACV			FALSE
20221007_MS_MRMhr_DC24_VACV_53C_r2.wiff	53C_r2	AAFEFINSL	9	C48H70N10O14	AAFEFINSL	AAFEFINSL	AAFEFINSL	AAFEFINSL	0.9473	0.997	#N/A	39.99+/-0.09	#N/A	1010.51	2	506.261	#N/A	40.04	1101456	524811	576645	3934	3934	0	#N/A	0.025724	VACV			FALSE
20221007_MS_MRMhr_DC24_VACV_53C_r3.wiff	53C_r3	AAFEFINSL	9	C48H70N10O14	AAFEFINSL	AAFEFINSL	AAFEFINSL	AAFEFINSL	0.9542	0.9958	#N/A	39.99+/-0.09	#N/A	1010.51	2	506.261	#N/A	40.04	1514739	699405	815334	2941	2941	0	#N/A	0.027579	VACV			FALSE
20221007_MS_MRMhr_DC24_VACV_57C_r1.wiff	57C_r1	AAFEFINSL	9	C48H70N10O14	AAFEFINSL	AAFEFINSL	AAFEFINSL	AAFEFINSL	0.9114	0.9755	#N/A	39.99+/-0.09	#N/A	1010.51	2	506.261	#N/A	40.04	150415	76277	74137	0	0	0	#N/A	0.00455	VACV			FALSE
20221007_MS_MRMhr_DC24_VACV_57C_r2.wiff	57C_r2	AAFEFINSL	9	C48H70N10O14	AAFEFINSL	AAFEFINSL	AAFEFINSL	AAFEFINSL	0.9013	0.946	#N/A	39.99+/-0.09	#N/A	1010.51	2	506.261	#N/A	40.04	78196	42783	35413	408	408	0	#N/A	0.002527	VACV			FALSE
20221007_MS_MRMhr_DC24_VACV_57C_r3.wiff	57C_r3	AAFEFINSL	9	C48H70N10O14	AAFEFINSL	AAFEFINSL	AAFEFINSL	AAFEFINSL	0.8398	0.9755	#N/A	39.99+/-0.09	#N/A	1010.51	2	506.261	#N/A	40.04	85226	44634	40592	0	0	0	#N/A	0.003229	VACV			FALSE
20221007_MS_MRMhr_DC24_VACV_61C_r1.wiff	61C_r1	AAFEFINSL	9	C48H70N10O14	AAFEFINSL	AAFEFINSL	AAFEFINSL	AAFEFINSL	0.5213	0.8275	#N/A	39.99+/-0.09	#N/A	1010.51	2	506.261	#N/A	40.04	6753	5970	783	91	91	0	#N/A	0.000318	VACV			FALSE
20221007_MS_MRMhr_DC24_VACV_61C_r2.wiff	61C_r2	AAFEFINSL	9	C48H70N10O14	AAFEFINSL	AAFEFINSL	AAFEFINSL	AAFEFINSL	0.3449	0.7958	#N/A	39.99+/-0.09	#N/A	1010.51	2	506.261	#N/A	40.04	6295	5164	1131	1394	1394	0	#N/A	0.000302	VACV			FALSE
20221007_MS_MRMhr_DC24_VACV_61C_r3.wiff	61C_r3	AAFEFINSL	9	C48H70N10O14	AAFEFINSL	AAFEFINSL	AAFEFINSL	AAFEFINSL	0.3534	0.7883	#N/A	39.99+/-0.09	#N/A	1010.51	2	506.261	#N/A	40.04	11104	9793	1311	887	887	0	#N/A	0.000476	VACV			FALSE
20221007_MS_MRMhr_DC24_VACV_65C_r1.wiff	65C_r1	AAFEFINSL	9	C48H70N10O14	AAFEFINSL	AAFEFINSL	AAFEFINSL	AAFEFINSL	0	0.7498	#N/A	39.99+/-0.09	#N/A	1010.51	2	506.261	#N/A	40.04	573	573	0	751	751	0	#N/A	âˆž	VACV			FALSE
20221007_MS_MRMhr_DC24_VACV_65C_r2.wiff	65C_r2	AAFEFINSL	9	C48H70N10O14	AAFEFINSL	AAFEFINSL	AAFEFINSL	AAFEFINSL	0	0.736	#N/A	39.99+/-0.09	#N/A	1010.51	2	506.261	#N/A	40.04	649	649	0	262	262	0	#N/A	âˆž	VACV			FALSE
20221007_MS_MRMhr_DC24_VACV_69C_r1.wiff	69C_r1	AAFEFINSL	9	C48H70N10O14	AAFEFINSL	AAFEFINSL	AAFEFINSL	AAFEFINSL	0	0.7729	#N/A	39.99+/-0.09	#N/A	1010.51	2	506.261	#N/A	40.04	1360	1360	0	502	502	0	#N/A	âˆž	VACV			FALSE
20221007_MS_MRMhr_DC24_VACV_69C_r2.wiff	69C_r2	AAFEFINSL	9	C48H70N10O14	AAFEFINSL	AAFEFINSL	AAFEFINSL	AAFEFINSL	0.4392	0.7374	#N/A	39.99+/-0.09	#N/A	1010.51	2	506.261	#N/A	40.04	2998	2305	693	0	0	0	#N/A	âˆž	VACV			FALSE
20221007_MS_MRMhr_DC24_VACV_69C_r3.wiff	69C_r3	AAFEFINSL	9	C48H70N10O14	AAFEFINSL	AAFEFINSL	AAFEFINSL	AAFEFINSL	0.3447	0.6872	#N/A	39.99+/-0.09	#N/A	1010.51	2	506.261	#N/A	40.04	5859	4339	1520	0	0	0	#N/A	âˆž	VACV			FALSE
20221007_MS_MRMhr_DC24_VACV_73C_r1.wiff	73C_r1	AAFEFINSL	9	C48H70N10O14	AAFEFINSL	AAFEFINSL	AAFEFINSL	AAFEFINSL	0	0.8017	#N/A	39.99+/-0.09	#N/A	1010.51	2	506.261	#N/A	40.04	2456	2456	0	0	0	0	#N/A	âˆž	VACV			FALSE
20221007_MS_MRMhr_DC24_VACV_73C_r2.wiff	73C_r2	AAFEFINSL	9	C48H70N10O14	AAFEFINSL	AAFEFINSL	AAFEFINSL	AAFEFINSL	0	0.8603	#N/A	39.99+/-0.09	#N/A	1010.51	2	506.261	#N/A	40.04	4546	4546	0	287	287	0	#N/A	âˆž	VACV			FALSE
20221007_MS_MRMhr_DC24_VACV_73C_r3.wiff	73C_r3	AAFEFINSL	9	C48H70N10O14	AAFEFINSL	AAFEFINSL	AAFEFINSL	AAFEFINSL	0.3633	0.7902	#N/A	39.99+/-0.09	#N/A	1010.51	2	506.261	#N/A	40.04	4291	3870	421	495	495	0	#N/A	âˆž	VACV			FALSE
20221010_MS_zenoSWATH_DC24_VACV_37C_r1.wiff	SWATH_r1	ITYRFYLI	8	C55H81N11O12	ITYRFYLI	ITYRFYLI	ITYRFYLI	ITYRFYLI	0.9821	0.9929	#N/A	35.99+/-0.05	#N/A	1087.61	2	544.811	#N/A	36.03	1462337	442715	1019622	13287	6370	6917	#N/A	0.010655	VACV			FALSE
20221010_MS_zenoSWATH_DC24_VACV_37C_r2.wiff	SWATH_r2	ITYRFYLI	8	C55H81N11O12	ITYRFYLI	ITYRFYLI	ITYRFYLI	ITYRFYLI	0.975	0.9947	#N/A	35.99+/-0.05	#N/A	1087.61	2	544.811	#N/A	36.03	853120	257328	595792	1571	481	1090	#N/A	0.008839	VACV			FALSE
20221010_MS_zenoSWATH_DC24_VACV_37C_r3.wiff	SWATH_r3	ITYRFYLI	8	C55H81N11O12	ITYRFYLI	ITYRFYLI	ITYRFYLI	ITYRFYLI	0.9731	0.9936	#N/A	35.99+/-0.05	#N/A	1087.61	2	544.811	#N/A	36.03	698204	209023	489181	3120	514	2606	#N/A	0.006117	VACV			FALSE
20221007_MS_MRMhr_DC24_VACV_37C_r1.wiff	37C_r1	ITYRFYLI	8	C55H81N11O12	ITYRFYLI	ITYRFYLI	ITYRFYLI	ITYRFYLI	0.972	0.9954	#N/A	35.99+/-0.05	#N/A	1087.61	2	544.811	#N/A	36.03	1922631	743775	1178856	8443	3823	4620	#N/A	0.016231	VACV			FALSE
20221007_MS_MRMhr_DC24_VACV_37C_r2.wiff	37C_r2	ITYRFYLI	8	C55H81N11O12	ITYRFYLI	ITYRFYLI	ITYRFYLI	ITYRFYLI	0.9644	0.9937	#N/A	35.99+/-0.05	#N/A	1087.61	2	544.811	#N/A	36.03	1462165	584104	878060	3095	3095	0	#N/A	0.012211	VACV			FALSE
20221007_MS_MRMhr_DC24_VACV_37C_r3.wiff	37C_r3	ITYRFYLI	8	C55H81N11O12	ITYRFYLI	ITYRFYLI	ITYRFYLI	ITYRFYLI	0.9807	0.9968	#N/A	35.99+/-0.05	#N/A	1087.61	2	544.811	#N/A	36.03	843405	317879	525526	1322	1322	0	#N/A	0.008456	VACV			FALSE
20221007_MS_MRMhr_DC24_VACV_41C_r1.wiff	41C_r1	ITYRFYLI	8	C55H81N11O12	ITYRFYLI	ITYRFYLI	ITYRFYLI	ITYRFYLI	0.8888	0.9947	#N/A	35.99+/-0.05	#N/A	1087.61	2	544.811	#N/A	36.03	185389	74099	111291	0	0	0	#N/A	0.002613	VACV			FALSE
20221007_MS_MRMhr_DC24_VACV_41C_r2.wiff	41C_r2	ITYRFYLI	8	C55H81N11O12	ITYRFYLI	ITYRFYLI	ITYRFYLI	ITYRFYLI	0.9791	0.9922	#N/A	35.99+/-0.05	#N/A	1087.61	2	544.811	#N/A	36.03	849541	350311	499230	0	0	0	#N/A	0.007491	VACV			FALSE
20221007_MS_MRMhr_DC24_VACV_41C_r3.wiff	41C_r3	ITYRFYLI	8	C55H81N11O12	ITYRFYLI	ITYRFYLI	ITYRFYLI	ITYRFYLI	0.9843	0.9971	#N/A	35.99+/-0.05	#N/A	1087.61	2	544.811	#N/A	36.03	1557333	592705	964628	2493	2493	0	#N/A	0.012085	VACV			FALSE
20221007_MS_MRMhr_DC24_VACV_45C_r1.wiff	45C_r1	ITYRFYLI	8	C55H81N11O12	ITYRFYLI	ITYRFYLI	ITYRFYLI	ITYRFYLI	0.9716	0.9957	#N/A	35.99+/-0.05	#N/A	1087.61	2	544.811	#N/A	36.03	1197214	479716	717498	1969	1969	0	#N/A	0.012495	VACV			FALSE
20221007_MS_MRMhr_DC24_VACV_45C_r2.wiff	45C_r2	ITYRFYLI	8	C55H81N11O12	ITYRFYLI	ITYRFYLI	ITYRFYLI	ITYRFYLI	0.9768	0.9946	#N/A	35.99+/-0.05	#N/A	1087.61	2	544.811	#N/A	36.03	1241561	486035	755526	5387	5387	0	#N/A	0.012161	VACV			FALSE
20221007_MS_MRMhr_DC24_VACV_45C_r3.wiff	45C_r3	ITYRFYLI	8	C55H81N11O12	ITYRFYLI	ITYRFYLI	ITYRFYLI	ITYRFYLI	0.9789	0.9974	#N/A	35.99+/-0.05	#N/A	1087.61	2	544.811	#N/A	36.03	1399214	542511	856703	774	774	0	#N/A	0.012684	VACV			FALSE
20221007_MS_MRMhr_DC24_VACV_49C_r1.wiff	49C_r1	ITYRFYLI	8	C55H81N11O12	ITYRFYLI	ITYRFYLI	ITYRFYLI	ITYRFYLI	0.9764	0.9928	#N/A	35.99+/-0.05	#N/A	1087.61	2	544.811	#N/A	36.03	593907	232651	361256	298	298	0	#N/A	0.009859	VACV			FALSE
20221007_MS_MRMhr_DC24_VACV_49C_r2.wiff	49C_r2	ITYRFYLI	8	C55H81N11O12	ITYRFYLI	ITYRFYLI	ITYRFYLI	ITYRFYLI	0.9747	0.9936	#N/A	35.99+/-0.05	#N/A	1087.61	2	544.811	#N/A	36.03	632166	247288	384877	4147	4147	0	#N/A	0.008205	VACV			FALSE
20221007_MS_MRMhr_DC24_VACV_49C_r3.wiff	49C_r3	ITYRFYLI	8	C55H81N11O12	ITYRFYLI	ITYRFYLI	ITYRFYLI	ITYRFYLI	0.9325	0.9966	#N/A	35.99+/-0.05	#N/A	1087.61	2	544.811	#N/A	36.03	193105	73086	120019	0	0	0	#N/A	0.003124	VACV			FALSE
20221007_MS_MRMhr_DC24_VACV_53C_r1.wiff	53C_r1	ITYRFYLI	8	C55H81N11O12	ITYRFYLI	ITYRFYLI	ITYRFYLI	ITYRFYLI	0.9577	0.9961	#N/A	35.99+/-0.05	#N/A	1087.61	2	544.811	#N/A	36.03	540058	217481	322577	0	0	0	#N/A	0.009083	VACV			FALSE
20221007_MS_MRMhr_DC24_VACV_53C_r2.wiff	53C_r2	ITYRFYLI	8	C55H81N11O12	ITYRFYLI	ITYRFYLI	ITYRFYLI	ITYRFYLI	0.5912	0.9495	#N/A	35.99+/-0.05	#N/A	1087.61	2	544.811	#N/A	36.03	9744	7889	1855	0	0	0	#N/A	0.000228	VACV			FALSE
20221007_MS_MRMhr_DC24_VACV_53C_r3.wiff	53C_r3	ITYRFYLI	8	C55H81N11O12	ITYRFYLI	ITYRFYLI	ITYRFYLI	ITYRFYLI	0.8543	0.9923	#N/A	35.99+/-0.05	#N/A	1087.61	2	544.811	#N/A	36.03	134529	52032	82498	116	116	0	#N/A	0.002449	VACV			FALSE
20221007_MS_MRMhr_DC24_VACV_57C_r1.wiff	57C_r1	ITYRFYLI	8	C55H81N11O12	ITYRFYLI	ITYRFYLI	ITYRFYLI	ITYRFYLI	0.9288	0.9624	#N/A	35.99+/-0.05	#N/A	1087.61	2	544.811	#N/A	36.03	263158	103444	159714	0	0	0	#N/A	0.00796	VACV			FALSE
20221007_MS_MRMhr_DC24_VACV_57C_r2.wiff	57C_r2	ITYRFYLI	8	C55H81N11O12	ITYRFYLI	ITYRFYLI	ITYRFYLI	ITYRFYLI	0.9145	0.9439	#N/A	35.99+/-0.05	#N/A	1087.61	2	544.811	#N/A	36.03	210719	103867	106852	0	0	0	#N/A	0.00681	VACV			FALSE
20221007_MS_MRMhr_DC24_VACV_57C_r3.wiff	57C_r3	ITYRFYLI	8	C55H81N11O12	ITYRFYLI	ITYRFYLI	ITYRFYLI	ITYRFYLI	0.9636	0.9562	#N/A	35.99+/-0.05	#N/A	1087.61	2	544.811	#N/A	36.03	125806	56742	69065	1813	1813	0	#N/A	0.004766	VACV			FALSE
20221007_MS_MRMhr_DC24_VACV_61C_r1.wiff	61C_r1	ITYRFYLI	8	C55H81N11O12	ITYRFYLI	ITYRFYLI	ITYRFYLI	ITYRFYLI	0.9554	0.9481	#N/A	35.99+/-0.05	#N/A	1087.61	2	544.811	#N/A	36.03	199952	85406	114547	0	0	0	#N/A	0.009426	VACV			FALSE
20221007_MS_MRMhr_DC24_VACV_61C_r2.wiff	61C_r2	ITYRFYLI	8	C55H81N11O12	ITYRFYLI	ITYRFYLI	ITYRFYLI	ITYRFYLI	0.9043	0.9411	#N/A	35.99+/-0.05	#N/A	1087.61	2	544.811	#N/A	36.03	158408	75747	82662	0	0	0	#N/A	0.007594	VACV			FALSE
20221007_MS_MRMhr_DC24_VACV_61C_r3.wiff	61C_r3	ITYRFYLI	8	C55H81N11O12	ITYRFYLI	ITYRFYLI	ITYRFYLI	ITYRFYLI	0.9622	0.9538	#N/A	35.99+/-0.05	#N/A	1087.61	2	544.811	#N/A	36.03	277256	111129	166127	62	62	0	#N/A	0.011897	VACV			FALSE
20221007_MS_MRMhr_DC24_VACV_65C_r1.wiff	65C_r1	ITYRFYLI	8	C55H81N11O12	ITYRFYLI	ITYRFYLI	ITYRFYLI	ITYRFYLI	0.9395	0.9684	#N/A	35.99+/-0.05	#N/A	1087.61	2	544.811	#N/A	36.03	286238	123828	162410	0	0	0	#N/A	âˆž	VACV			FALSE
20221007_MS_MRMhr_DC24_VACV_65C_r2.wiff	65C_r2	ITYRFYLI	8	C55H81N11O12	ITYRFYLI	ITYRFYLI	ITYRFYLI	ITYRFYLI	0.9037	0.9552	#N/A	35.99+/-0.05	#N/A	1087.61	2	544.811	#N/A	36.03	135769	60083	75686	633	633	0	#N/A	âˆž	VACV			FALSE
20221007_MS_MRMhr_DC24_VACV_69C_r1.wiff	69C_r1	ITYRFYLI	8	C55H81N11O12	ITYRFYLI	ITYRFYLI	ITYRFYLI	ITYRFYLI	0.9523	0.9603	#N/A	35.99+/-0.05	#N/A	1087.61	2	544.811	#N/A	36.03	477425	193140	284286	0	0	0	#N/A	âˆž	VACV			FALSE
20221007_MS_MRMhr_DC24_VACV_69C_r2.wiff	69C_r2	ITYRFYLI	8	C55H81N11O12	ITYRFYLI	ITYRFYLI	ITYRFYLI	ITYRFYLI	0.9557	0.9532	#N/A	35.99+/-0.05	#N/A	1087.61	2	544.811	#N/A	36.03	380606	161615	218990	0	0	0	#N/A	âˆž	VACV			FALSE
20221007_MS_MRMhr_DC24_VACV_69C_r3.wiff	69C_r3	ITYRFYLI	8	C55H81N11O12	ITYRFYLI	ITYRFYLI	ITYRFYLI	ITYRFYLI	0.9418	0.9667	#N/A	35.99+/-0.05	#N/A	1087.61	2	544.811	#N/A	36.03	417703	181128	236575	374	374	0	#N/A	âˆž	VACV			FALSE
20221007_MS_MRMhr_DC24_VACV_73C_r1.wiff	73C_r1	ITYRFYLI	8	C55H81N11O12	ITYRFYLI	ITYRFYLI	ITYRFYLI	ITYRFYLI	0.9576	0.959	#N/A	35.99+/-0.05	#N/A	1087.61	2	544.811	#N/A	36.03	808894	341162	467732	0	0	0	#N/A	âˆž	VACV			FALSE
20221007_MS_MRMhr_DC24_VACV_73C_r2.wiff	73C_r2	ITYRFYLI	8	C55H81N11O12	ITYRFYLI	ITYRFYLI	ITYRFYLI	ITYRFYLI	0.8627	0.9513	#N/A	35.99+/-0.05	#N/A	1087.61	2	544.811	#N/A	36.03	1335575	533569	802006	2678	0	2678	#N/A	âˆž	VACV			FALSE
20221007_MS_MRMhr_DC24_VACV_73C_r3.wiff	73C_r3	ITYRFYLI	8	C55H81N11O12	ITYRFYLI	ITYRFYLI	ITYRFYLI	ITYRFYLI	0.9192	0.95	#N/A	35.99+/-0.05	#N/A	1087.61	2	544.811	#N/A	36.03	1126566	456315	670252	0	0	0	#N/A	âˆž	VACV			FALSE
20221010_MS_zenoSWATH_DC24_VACV_37C_r1.wiff	SWATH_r1	KSYNYMLL	8	C48H74N10O13S	KSYNYMLL	KSYNYMLL	KSYNYMLL	KSYNYMLL	0.9648	0.9708	#N/A	28.24+/-0.1	#N/A	1030.52	2	516.265	#N/A	28.25	53352	14886	38466	0	0	0	#N/A	0.000389	VACV			FALSE
20221010_MS_zenoSWATH_DC24_VACV_37C_r2.wiff	SWATH_r2	KSYNYMLL	8	C48H74N10O13S	KSYNYMLL	KSYNYMLL	KSYNYMLL	KSYNYMLL	0.9793	0.9907	#N/A	28.24+/-0.1	#N/A	1030.52	2	516.265	#N/A	28.25	260057	68527	191530	0	0	0	#N/A	0.002695	VACV			FALSE
20221010_MS_zenoSWATH_DC24_VACV_37C_r3.wiff	SWATH_r3	KSYNYMLL	8	C48H74N10O13S	KSYNYMLL	KSYNYMLL	KSYNYMLL	KSYNYMLL	0.9575	0.9965	#N/A	28.24+/-0.1	#N/A	1030.52	2	516.265	#N/A	28.25	47827	13736	34090	0	0	0	#N/A	0.000419	VACV			FALSE
20221007_MS_MRMhr_DC24_VACV_37C_r1.wiff	37C_r1	KSYNYMLL	8	C48H74N10O13S	KSYNYMLL	KSYNYMLL	KSYNYMLL	KSYNYMLL	0.921	0.9797	#N/A	28.24+/-0.1	#N/A	1030.52	2	516.265	#N/A	28.25	76386	30550	45836	0	0	0	#N/A	0.000645	VACV			FALSE
20221007_MS_MRMhr_DC24_VACV_37C_r2.wiff	37C_r2	KSYNYMLL	8	C48H74N10O13S	KSYNYMLL	KSYNYMLL	KSYNYMLL	KSYNYMLL	0.9755	0.9923	#N/A	28.24+/-0.1	#N/A	1030.52	2	516.265	#N/A	28.25	552638	196740	355897	255	0	255	#N/A	0.004615	VACV			FALSE
20221007_MS_MRMhr_DC24_VACV_37C_r3.wiff	37C_r3	KSYNYMLL	8	C48H74N10O13S	KSYNYMLL	KSYNYMLL	KSYNYMLL	KSYNYMLL	0.9313	0.9743	#N/A	28.24+/-0.1	#N/A	1030.52	2	516.265	#N/A	28.25	81519	28815	52703	0	0	0	#N/A	0.000817	VACV			FALSE
20221007_MS_MRMhr_DC24_VACV_41C_r1.wiff	41C_r1	KSYNYMLL	8	C48H74N10O13S	KSYNYMLL	KSYNYMLL	KSYNYMLL	KSYNYMLL	0.8986	0.9911	#N/A	28.24+/-0.1	#N/A	1030.52	2	516.265	#N/A	28.25	97925	37816	60109	0	0	0	#N/A	0.00138	VACV			FALSE
20221007_MS_MRMhr_DC24_VACV_41C_r2.wiff	41C_r2	KSYNYMLL	8	C48H74N10O13S	KSYNYMLL	KSYNYMLL	KSYNYMLL	KSYNYMLL	0.9748	0.9871	#N/A	28.24+/-0.1	#N/A	1030.52	2	516.265	#N/A	28.25	278740	98703	180037	0	0	0	#N/A	0.002458	VACV			FALSE
20221007_MS_MRMhr_DC24_VACV_41C_r3.wiff	41C_r3	KSYNYMLL	8	C48H74N10O13S	KSYNYMLL	KSYNYMLL	KSYNYMLL	KSYNYMLL	0.9358	0.9865	#N/A	28.24+/-0.1	#N/A	1030.52	2	516.265	#N/A	28.25	251766	84454	167312	0	0	0	#N/A	0.001954	VACV			FALSE
20221007_MS_MRMhr_DC24_VACV_45C_r1.wiff	45C_r1	KSYNYMLL	8	C48H74N10O13S	KSYNYMLL	KSYNYMLL	KSYNYMLL	KSYNYMLL	0.9546	0.9926	#N/A	28.24+/-0.1	#N/A	1030.52	2	516.265	#N/A	28.25	110200	42588	67611	0	0	0	#N/A	0.00115	VACV			FALSE
20221007_MS_MRMhr_DC24_VACV_45C_r2.wiff	45C_r2	KSYNYMLL	8	C48H74N10O13S	KSYNYMLL	KSYNYMLL	KSYNYMLL	KSYNYMLL	0.9535	0.9838	#N/A	28.24+/-0.1	#N/A	1030.52	2	516.265	#N/A	28.25	196477	77676	118801	0	0	0	#N/A	0.001924	VACV			FALSE
20221007_MS_MRMhr_DC24_VACV_45C_r3.wiff	45C_r3	KSYNYMLL	8	C48H74N10O13S	KSYNYMLL	KSYNYMLL	KSYNYMLL	KSYNYMLL	0.9338	0.9949	#N/A	28.24+/-0.1	#N/A	1030.52	2	516.265	#N/A	28.25	162915	62452	100463	0	0	0	#N/A	0.001477	VACV			FALSE
20221007_MS_MRMhr_DC24_VACV_49C_r1.wiff	49C_r1	KSYNYMLL	8	C48H74N10O13S	KSYNYMLL	KSYNYMLL	KSYNYMLL	KSYNYMLL	0.9114	0.9824	#N/A	28.24+/-0.1	#N/A	1030.52	2	516.265	#N/A	28.25	76750	32068	44682	0	0	0	#N/A	0.001274	VACV			FALSE
20221007_MS_MRMhr_DC24_VACV_49C_r2.wiff	49C_r2	KSYNYMLL	8	C48H74N10O13S	KSYNYMLL	KSYNYMLL	KSYNYMLL	KSYNYMLL	0.9385	0.9912	#N/A	28.24+/-0.1	#N/A	1030.52	2	516.265	#N/A	28.25	136817	50278	86540	0	0	0	#N/A	0.001776	VACV			FALSE
20221007_MS_MRMhr_DC24_VACV_49C_r3.wiff	49C_r3	KSYNYMLL	8	C48H74N10O13S	KSYNYMLL	KSYNYMLL	KSYNYMLL	KSYNYMLL	0.9432	0.9915	#N/A	28.24+/-0.1	#N/A	1030.52	2	516.265	#N/A	28.25	125045	44271	80774	0	0	0	#N/A	0.002023	VACV			FALSE
20221007_MS_MRMhr_DC24_VACV_53C_r1.wiff	53C_r1	KSYNYMLL	8	C48H74N10O13S	KSYNYMLL	KSYNYMLL	KSYNYMLL	KSYNYMLL	0.8338	0.9795	#N/A	28.24+/-0.1	#N/A	1030.52	2	516.265	#N/A	28.25	39877	17284	22594	0	0	0	#N/A	0.000671	VACV			FALSE
20221007_MS_MRMhr_DC24_VACV_53C_r2.wiff	53C_r2	KSYNYMLL	8	C48H74N10O13S	KSYNYMLL	KSYNYMLL	KSYNYMLL	KSYNYMLL	0.8513	0.9915	#N/A	28.24+/-0.1	#N/A	1030.52	2	516.265	#N/A	28.25	19755	10470	9285	0	0	0	#N/A	0.000461	VACV			FALSE
20221007_MS_MRMhr_DC24_VACV_53C_r3.wiff	53C_r3	KSYNYMLL	8	C48H74N10O13S	KSYNYMLL	KSYNYMLL	KSYNYMLL	KSYNYMLL	0.8126	0.9708	#N/A	28.24+/-0.1	#N/A	1030.52	2	516.265	#N/A	28.25	12081	7623	4457	0	0	0	#N/A	0.00022	VACV			FALSE
20221007_MS_MRMhr_DC24_VACV_57C_r1.wiff	57C_r1	KSYNYMLL	8	C48H74N10O13S	KSYNYMLL	KSYNYMLL	KSYNYMLL	KSYNYMLL	0.7907	0.9616	#N/A	28.24+/-0.1	#N/A	1030.52	2	516.265	#N/A	28.25	35028	18896	16132	0	0	0	#N/A	0.00106	VACV			FALSE
20221007_MS_MRMhr_DC24_VACV_57C_r2.wiff	57C_r2	KSYNYMLL	8	C48H74N10O13S	KSYNYMLL	KSYNYMLL	KSYNYMLL	KSYNYMLL	0.6749	0.9413	#N/A	28.24+/-0.1	#N/A	1030.52	2	516.265	#N/A	28.25	14306	7674	6633	0	0	0	#N/A	0.000462	VACV			FALSE
20221007_MS_MRMhr_DC24_VACV_57C_r3.wiff	57C_r3	KSYNYMLL	8	C48H74N10O13S	KSYNYMLL	KSYNYMLL	KSYNYMLL	KSYNYMLL	0.7933	0.9669	#N/A	28.24+/-0.1	#N/A	1030.52	2	516.265	#N/A	28.25	13953	11425	2528	0	0	0	#N/A	0.000529	VACV			FALSE
20221007_MS_MRMhr_DC24_VACV_61C_r1.wiff	61C_r1	KSYNYMLL	8	C48H74N10O13S	KSYNYMLL	KSYNYMLL	KSYNYMLL	KSYNYMLL	0.5244	0.8923	#N/A	28.24+/-0.1	#N/A	1030.52	2	516.265	#N/A	28.25	24704	18601	6103	0	0	0	#N/A	0.001165	VACV			FALSE
20221007_MS_MRMhr_DC24_VACV_61C_r2.wiff	61C_r2	KSYNYMLL	8	C48H74N10O13S	KSYNYMLL	KSYNYMLL	KSYNYMLL	KSYNYMLL	0.4443	0.8109	#N/A	28.24+/-0.1	#N/A	1030.52	2	516.265	#N/A	28.25	12419	9243	3176	4222	3209	1012	#N/A	0.000595	VACV			FALSE
20221007_MS_MRMhr_DC24_VACV_61C_r3.wiff	61C_r3	KSYNYMLL	8	C48H74N10O13S	KSYNYMLL	KSYNYMLL	KSYNYMLL	KSYNYMLL	0.4326	0.8866	#N/A	28.24+/-0.1	#N/A	1030.52	2	516.265	#N/A	28.25	16307	13063	3244	0	0	0	#N/A	0.0007	VACV			FALSE
20221007_MS_MRMhr_DC24_VACV_65C_r1.wiff	65C_r1	KSYNYMLL	8	C48H74N10O13S	KSYNYMLL	KSYNYMLL	KSYNYMLL	KSYNYMLL	0.4326	0.7231	#N/A	28.24+/-0.1	#N/A	1030.52	2	516.265	#N/A	28.25	6963	6961	2	0	0	0	#N/A	âˆž	VACV			FALSE
20221007_MS_MRMhr_DC24_VACV_65C_r2.wiff	65C_r2	KSYNYMLL	8	C48H74N10O13S	KSYNYMLL	KSYNYMLL	KSYNYMLL	KSYNYMLL	0	0.6913	#N/A	28.24+/-0.1	#N/A	1030.52	2	516.265	#N/A	28.25	2100	2100	0	553	553	0	#N/A	âˆž	VACV			FALSE
20221007_MS_MRMhr_DC24_VACV_69C_r1.wiff	69C_r1	KSYNYMLL	8	C48H74N10O13S	KSYNYMLL	KSYNYMLL	KSYNYMLL	KSYNYMLL	0	0.7611	#N/A	28.24+/-0.1	#N/A	1030.52	2	516.265	#N/A	28.25	5777	5777	0	0	0	0	#N/A	âˆž	VACV			FALSE
20221007_MS_MRMhr_DC24_VACV_69C_r2.wiff	69C_r2	KSYNYMLL	8	C48H74N10O13S	KSYNYMLL	KSYNYMLL	KSYNYMLL	KSYNYMLL	0.2602	0.6483	#N/A	28.24+/-0.1	#N/A	1030.52	2	516.265	#N/A	28.25	4091	3323	767	0	0	0	#N/A	âˆž	VACV			FALSE
20221007_MS_MRMhr_DC24_VACV_69C_r3.wiff	69C_r3	KSYNYMLL	8	C48H74N10O13S	KSYNYMLL	KSYNYMLL	KSYNYMLL	KSYNYMLL	0	0.6715	#N/A	28.24+/-0.1	#N/A	1030.52	2	516.265	#N/A	28.25	2552	2552	0	0	0	0	#N/A	âˆž	VACV			FALSE
20221007_MS_MRMhr_DC24_VACV_73C_r1.wiff	73C_r1	KSYNYMLL	8	C48H74N10O13S	KSYNYMLL	KSYNYMLL	KSYNYMLL	KSYNYMLL	0	0.7622	#N/A	28.24+/-0.1	#N/A	1030.52	2	516.265	#N/A	28.25	4932	4932	0	700	700	0	#N/A	âˆž	VACV			FALSE
20221007_MS_MRMhr_DC24_VACV_73C_r2.wiff	73C_r2	KSYNYMLL	8	C48H74N10O13S	KSYNYMLL	KSYNYMLL	KSYNYMLL	KSYNYMLL	0.6848	0.4068	#N/A	28.24+/-0.1	#N/A	1030.52	2	516.265	#N/A	28.25	8288	7897	392	0	0	0	#N/A	âˆž	VACV			FALSE
20221007_MS_MRMhr_DC24_VACV_73C_r3.wiff	73C_r3	KSYNYMLL	8	C48H74N10O13S	KSYNYMLL	KSYNYMLL	KSYNYMLL	KSYNYMLL	0	0.6638	#N/A	28.24+/-0.1	#N/A	1030.52	2	516.265	#N/A	28.25	7700	7700	0	0	0	0	#N/A	âˆž	VACV			FALSE
20221010_MS_zenoSWATH_DC24_VACV_37C_r1.wiff	SWATH_r1	KSYNYMLL	8	C48H73N9O14S	KSYN[+1]YMLL	KSYN(unimod:7)YMLL	KSYN[Dea]YMLL	KSYN[Deamidated (NQ)]YMLL	0.7017	0.9824	#N/A	31.32+/-0.08	#N/A	1031.5	2	516.757	#N/A	31.36	436442	317281	119160	0	0	0	#N/A	0.00318	VACV			FALSE
20221010_MS_zenoSWATH_DC24_VACV_37C_r2.wiff	SWATH_r2	KSYNYMLL	8	C48H73N9O14S	KSYN[+1]YMLL	KSYN(unimod:7)YMLL	KSYN[Dea]YMLL	KSYN[Deamidated (NQ)]YMLL	0.6968	0.9818	#N/A	31.32+/-0.08	#N/A	1031.5	2	516.757	#N/A	31.36	193791	145309	48482	29	29	0	#N/A	0.002008	VACV			FALSE
20221010_MS_zenoSWATH_DC24_VACV_37C_r3.wiff	SWATH_r3	KSYNYMLL	8	C48H73N9O14S	KSYN[+1]YMLL	KSYN(unimod:7)YMLL	KSYN[Dea]YMLL	KSYN[Deamidated (NQ)]YMLL	0.7129	0.9815	#N/A	31.32+/-0.08	#N/A	1031.5	2	516.757	#N/A	31.36	358288	264139	94149	0	0	0	#N/A	0.003139	VACV			FALSE
20221007_MS_MRMhr_DC24_VACV_37C_r1.wiff	37C_r1	KSYNYMLL	8	C48H73N9O14S	KSYN[+1]YMLL	KSYN(unimod:7)YMLL	KSYN[Dea]YMLL	KSYN[Deamidated (NQ)]YMLL	0	0.9798	#N/A	31.32+/-0.08	#N/A	1031.5	2	516.757	#N/A	31.36	516360	516360	#N/A	0	0	#N/A	#N/A	0.004359	VACV			FALSE
20221007_MS_MRMhr_DC24_VACV_37C_r2.wiff	37C_r2	KSYNYMLL	8	C48H73N9O14S	KSYN[+1]YMLL	KSYN(unimod:7)YMLL	KSYN[Dea]YMLL	KSYN[Deamidated (NQ)]YMLL	0	0.9736	#N/A	31.32+/-0.08	#N/A	1031.5	2	516.757	#N/A	31.36	298874	298874	#N/A	0	0	#N/A	#N/A	0.002496	VACV			FALSE
20221007_MS_MRMhr_DC24_VACV_37C_r3.wiff	37C_r3	KSYNYMLL	8	C48H73N9O14S	KSYN[+1]YMLL	KSYN(unimod:7)YMLL	KSYN[Dea]YMLL	KSYN[Deamidated (NQ)]YMLL	0	0.9822	#N/A	31.32+/-0.08	#N/A	1031.5	2	516.757	#N/A	31.36	469614	469614	#N/A	0	0	#N/A	#N/A	0.004708	VACV			FALSE
20221007_MS_MRMhr_DC24_VACV_41C_r1.wiff	41C_r1	KSYNYMLL	8	C48H73N9O14S	KSYN[+1]YMLL	KSYN(unimod:7)YMLL	KSYN[Dea]YMLL	KSYN[Deamidated (NQ)]YMLL	0	0.9763	#N/A	31.32+/-0.08	#N/A	1031.5	2	516.757	#N/A	31.36	270884	270884	#N/A	0	0	#N/A	#N/A	0.003817	VACV			FALSE
20221007_MS_MRMhr_DC24_VACV_41C_r2.wiff	41C_r2	KSYNYMLL	8	C48H73N9O14S	KSYN[+1]YMLL	KSYN(unimod:7)YMLL	KSYN[Dea]YMLL	KSYN[Deamidated (NQ)]YMLL	0	0.9817	#N/A	31.32+/-0.08	#N/A	1031.5	2	516.757	#N/A	31.36	419630	419630	#N/A	0	0	#N/A	#N/A	0.0037	VACV			FALSE
20221007_MS_MRMhr_DC24_VACV_41C_r3.wiff	41C_r3	KSYNYMLL	8	C48H73N9O14S	KSYN[+1]YMLL	KSYN(unimod:7)YMLL	KSYN[Dea]YMLL	KSYN[Deamidated (NQ)]YMLL	0	0.9809	#N/A	31.32+/-0.08	#N/A	1031.5	2	516.757	#N/A	31.36	493227	493227	#N/A	0	0	#N/A	#N/A	0.003827	VACV			FALSE
20221007_MS_MRMhr_DC24_VACV_45C_r1.wiff	45C_r1	KSYNYMLL	8	C48H73N9O14S	KSYN[+1]YMLL	KSYN(unimod:7)YMLL	KSYN[Dea]YMLL	KSYN[Deamidated (NQ)]YMLL	0	0.9835	#N/A	31.32+/-0.08	#N/A	1031.5	2	516.757	#N/A	31.36	387852	387852	#N/A	0	0	#N/A	#N/A	0.004048	VACV			FALSE
20221007_MS_MRMhr_DC24_VACV_45C_r2.wiff	45C_r2	KSYNYMLL	8	C48H73N9O14S	KSYN[+1]YMLL	KSYN(unimod:7)YMLL	KSYN[Dea]YMLL	KSYN[Deamidated (NQ)]YMLL	0	0.9765	#N/A	31.32+/-0.08	#N/A	1031.5	2	516.757	#N/A	31.36	355408	355408	#N/A	0	0	#N/A	#N/A	0.003481	VACV			FALSE
20221007_MS_MRMhr_DC24_VACV_45C_r3.wiff	45C_r3	KSYNYMLL	8	C48H73N9O14S	KSYN[+1]YMLL	KSYN(unimod:7)YMLL	KSYN[Dea]YMLL	KSYN[Deamidated (NQ)]YMLL	0	0.9824	#N/A	31.32+/-0.08	#N/A	1031.5	2	516.757	#N/A	31.36	411094	411094	#N/A	0	0	#N/A	#N/A	0.003727	VACV			FALSE
20221007_MS_MRMhr_DC24_VACV_49C_r1.wiff	49C_r1	KSYNYMLL	8	C48H73N9O14S	KSYN[+1]YMLL	KSYN(unimod:7)YMLL	KSYN[Dea]YMLL	KSYN[Deamidated (NQ)]YMLL	0	0.9788	#N/A	31.32+/-0.08	#N/A	1031.5	2	516.757	#N/A	31.36	204296	204296	#N/A	0	0	#N/A	#N/A	0.003392	VACV			FALSE
20221007_MS_MRMhr_DC24_VACV_49C_r2.wiff	49C_r2	KSYNYMLL	8	C48H73N9O14S	KSYN[+1]YMLL	KSYN(unimod:7)YMLL	KSYN[Dea]YMLL	KSYN[Deamidated (NQ)]YMLL	0	0.9811	#N/A	31.32+/-0.08	#N/A	1031.5	2	516.757	#N/A	31.36	285791	285791	#N/A	0	0	#N/A	#N/A	0.003709	VACV			FALSE
20221007_MS_MRMhr_DC24_VACV_49C_r3.wiff	49C_r3	KSYNYMLL	8	C48H73N9O14S	KSYN[+1]YMLL	KSYN(unimod:7)YMLL	KSYN[Dea]YMLL	KSYN[Deamidated (NQ)]YMLL	0	0.9793	#N/A	31.32+/-0.08	#N/A	1031.5	2	516.757	#N/A	31.36	225100	225100	#N/A	0	0	#N/A	#N/A	0.003641	VACV			FALSE
20221007_MS_MRMhr_DC24_VACV_53C_r1.wiff	53C_r1	KSYNYMLL	8	C48H73N9O14S	KSYN[+1]YMLL	KSYN(unimod:7)YMLL	KSYN[Dea]YMLL	KSYN[Deamidated (NQ)]YMLL	0	0.9919	#N/A	31.32+/-0.08	#N/A	1031.5	2	516.757	#N/A	31.36	196376	196376	#N/A	0	0	#N/A	#N/A	0.003303	VACV			FALSE
20221007_MS_MRMhr_DC24_VACV_53C_r2.wiff	53C_r2	KSYNYMLL	8	C48H73N9O14S	KSYN[+1]YMLL	KSYN(unimod:7)YMLL	KSYN[Dea]YMLL	KSYN[Deamidated (NQ)]YMLL	0	0.9894	#N/A	31.32+/-0.08	#N/A	1031.5	2	516.757	#N/A	31.36	193741	193741	#N/A	0	0	#N/A	#N/A	0.004525	VACV			FALSE
20221007_MS_MRMhr_DC24_VACV_53C_r3.wiff	53C_r3	KSYNYMLL	8	C48H73N9O14S	KSYN[+1]YMLL	KSYN(unimod:7)YMLL	KSYN[Dea]YMLL	KSYN[Deamidated (NQ)]YMLL	0	0.9904	#N/A	31.32+/-0.08	#N/A	1031.5	2	516.757	#N/A	31.36	241300	241300	#N/A	0	0	#N/A	#N/A	0.004393	VACV			FALSE
20221007_MS_MRMhr_DC24_VACV_57C_r1.wiff	57C_r1	KSYNYMLL	8	C48H73N9O14S	KSYN[+1]YMLL	KSYN(unimod:7)YMLL	KSYN[Dea]YMLL	KSYN[Deamidated (NQ)]YMLL	0	0.9326	#N/A	31.32+/-0.08	#N/A	1031.5	2	516.757	#N/A	31.36	19950	19950	#N/A	0	0	#N/A	#N/A	0.000603	VACV			FALSE
20221007_MS_MRMhr_DC24_VACV_57C_r2.wiff	57C_r2	KSYNYMLL	8	C48H73N9O14S	KSYN[+1]YMLL	KSYN(unimod:7)YMLL	KSYN[Dea]YMLL	KSYN[Deamidated (NQ)]YMLL	0	0.9316	#N/A	31.32+/-0.08	#N/A	1031.5	2	516.757	#N/A	31.36	26050	26050	#N/A	0	0	#N/A	#N/A	0.000842	VACV			FALSE
20221007_MS_MRMhr_DC24_VACV_57C_r3.wiff	57C_r3	KSYNYMLL	8	C48H73N9O14S	KSYN[+1]YMLL	KSYN(unimod:7)YMLL	KSYN[Dea]YMLL	KSYN[Deamidated (NQ)]YMLL	0	0.9385	#N/A	31.32+/-0.08	#N/A	1031.5	2	516.757	#N/A	31.36	17845	17845	#N/A	0	0	#N/A	#N/A	0.000676	VACV			FALSE
20221007_MS_MRMhr_DC24_VACV_61C_r1.wiff	61C_r1	KSYNYMLL	8	C48H73N9O14S	KSYN[+1]YMLL	KSYN(unimod:7)YMLL	KSYN[Dea]YMLL	KSYN[Deamidated (NQ)]YMLL	0	0.7998	#N/A	31.32+/-0.08	#N/A	1031.5	2	516.757	#N/A	31.36	6945	6945	#N/A	0	0	#N/A	#N/A	0.000327	VACV			FALSE
20221007_MS_MRMhr_DC24_VACV_61C_r2.wiff	61C_r2	KSYNYMLL	8	C48H73N9O14S	KSYN[+1]YMLL	KSYN(unimod:7)YMLL	KSYN[Dea]YMLL	KSYN[Deamidated (NQ)]YMLL	0	0.8301	#N/A	31.32+/-0.08	#N/A	1031.5	2	516.757	#N/A	31.36	9108	9108	#N/A	0	0	#N/A	#N/A	0.000437	VACV			FALSE
20221007_MS_MRMhr_DC24_VACV_61C_r3.wiff	61C_r3	KSYNYMLL	8	C48H73N9O14S	KSYN[+1]YMLL	KSYN(unimod:7)YMLL	KSYN[Dea]YMLL	KSYN[Deamidated (NQ)]YMLL	0	0.8402	#N/A	31.32+/-0.08	#N/A	1031.5	2	516.757	#N/A	31.36	6993	6993	#N/A	0	0	#N/A	#N/A	0.0003	VACV			FALSE
20221007_MS_MRMhr_DC24_VACV_65C_r1.wiff	65C_r1	KSYNYMLL	8	C48H73N9O14S	KSYN[+1]YMLL	KSYN(unimod:7)YMLL	KSYN[Dea]YMLL	KSYN[Deamidated (NQ)]YMLL	0	0.8533	#N/A	31.32+/-0.08	#N/A	1031.5	2	516.757	#N/A	31.36	2198	2198	#N/A	781	781	#N/A	#N/A	âˆž	VACV			FALSE
20221007_MS_MRMhr_DC24_VACV_65C_r2.wiff	65C_r2	KSYNYMLL	8	C48H73N9O14S	KSYN[+1]YMLL	KSYN(unimod:7)YMLL	KSYN[Dea]YMLL	KSYN[Deamidated (NQ)]YMLL	0	0.6719	#N/A	31.32+/-0.08	#N/A	1031.5	2	516.757	#N/A	31.36	2385	2385	#N/A	766	766	#N/A	#N/A	âˆž	VACV			FALSE
20221007_MS_MRMhr_DC24_VACV_69C_r1.wiff	69C_r1	KSYNYMLL	8	C48H73N9O14S	KSYN[+1]YMLL	KSYN(unimod:7)YMLL	KSYN[Dea]YMLL	KSYN[Deamidated (NQ)]YMLL	0	0.8117	#N/A	31.32+/-0.08	#N/A	1031.5	2	516.757	#N/A	31.36	4120	4120	#N/A	628	628	#N/A	#N/A	âˆž	VACV			FALSE
20221007_MS_MRMhr_DC24_VACV_69C_r2.wiff	69C_r2	KSYNYMLL	8	C48H73N9O14S	KSYN[+1]YMLL	KSYN(unimod:7)YMLL	KSYN[Dea]YMLL	KSYN[Deamidated (NQ)]YMLL	0	0.7641	#N/A	31.32+/-0.08	#N/A	1031.5	2	516.757	#N/A	31.36	4288	4288	#N/A	0	0	#N/A	#N/A	âˆž	VACV			FALSE
20221007_MS_MRMhr_DC24_VACV_69C_r3.wiff	69C_r3	KSYNYMLL	8	C48H73N9O14S	KSYN[+1]YMLL	KSYN(unimod:7)YMLL	KSYN[Dea]YMLL	KSYN[Deamidated (NQ)]YMLL	0	0.9536	#N/A	31.32+/-0.08	#N/A	1031.5	2	516.757	#N/A	31.36	3978	3978	#N/A	0	0	#N/A	#N/A	âˆž	VACV			FALSE
20221007_MS_MRMhr_DC24_VACV_73C_r1.wiff	73C_r1	KSYNYMLL	8	C48H73N9O14S	KSYN[+1]YMLL	KSYN(unimod:7)YMLL	KSYN[Dea]YMLL	KSYN[Deamidated (NQ)]YMLL	0	0.7163	#N/A	31.32+/-0.08	#N/A	1031.5	2	516.757	#N/A	31.36	3870	3870	#N/A	0	0	#N/A	#N/A	âˆž	VACV			FALSE
20221007_MS_MRMhr_DC24_VACV_73C_r2.wiff	73C_r2	KSYNYMLL	8	C48H73N9O14S	KSYN[+1]YMLL	KSYN(unimod:7)YMLL	KSYN[Dea]YMLL	KSYN[Deamidated (NQ)]YMLL	0	0.8826	#N/A	31.32+/-0.08	#N/A	1031.5	2	516.757	#N/A	31.36	3092	3092	#N/A	0	0	#N/A	#N/A	âˆž	VACV			FALSE
20221007_MS_MRMhr_DC24_VACV_73C_r3.wiff	73C_r3	KSYNYMLL	8	C48H73N9O14S	KSYN[+1]YMLL	KSYN(unimod:7)YMLL	KSYN[Dea]YMLL	KSYN[Deamidated (NQ)]YMLL	0	0.8048	#N/A	31.32+/-0.08	#N/A	1031.5	2	516.757	#N/A	31.36	5194	5194	#N/A	0	0	#N/A	#N/A	âˆž	VACV			FALSE
20221010_MS_zenoSWATH_DC24_VACV_37C_r1.wiff	SWATH_r1	KSYNYMLL	8	C48H74N10O14S	KSYNYM[+16]LL	KSYNYM(unimod:35)LL	KSYNYM[Oxi]LL	KSYNYM[Oxidation (M)]LL	0.9582	0.9915	#N/A	23.89+/-0.03	#N/A	1046.51	2	524.263	#N/A	23.95	811616	266582	545034	20912	14715	6197	#N/A	0.005914	VACV			FALSE
20221010_MS_zenoSWATH_DC24_VACV_37C_r2.wiff	SWATH_r2	KSYNYMLL	8	C48H74N10O14S	KSYNYM[+16]LL	KSYNYM(unimod:35)LL	KSYNYM[Oxi]LL	KSYNYM[Oxidation (M)]LL	0.962	0.9918	#N/A	23.89+/-0.03	#N/A	1046.51	2	524.263	#N/A	23.95	397988	121948	276040	7126	7126	0	#N/A	0.004124	VACV			FALSE
20221010_MS_zenoSWATH_DC24_VACV_37C_r3.wiff	SWATH_r3	KSYNYMLL	8	C48H74N10O14S	KSYNYM[+16]LL	KSYNYM(unimod:35)LL	KSYNYM[Oxi]LL	KSYNYM[Oxidation (M)]LL	0.9666	0.989	#N/A	23.89+/-0.03	#N/A	1046.51	2	524.263	#N/A	23.95	657824	211629	446195	5192	5192	0	#N/A	0.005763	VACV			FALSE
20221007_MS_MRMhr_DC24_VACV_37C_r1.wiff	37C_r1	KSYNYMLL	8	C48H74N10O14S	KSYNYM[+16]LL	KSYNYM(unimod:35)LL	KSYNYM[Oxi]LL	KSYNYM[Oxidation (M)]LL	0.9782	0.9906	#N/A	23.89+/-0.03	#N/A	1046.51	2	524.263	#N/A	23.95	868822	417822	451000	16695	16695	0	#N/A	0.007335	VACV			FALSE
20221007_MS_MRMhr_DC24_VACV_37C_r2.wiff	37C_r2	KSYNYMLL	8	C48H74N10O14S	KSYNYM[+16]LL	KSYNYM(unimod:35)LL	KSYNYM[Oxi]LL	KSYNYM[Oxidation (M)]LL	0.9827	0.986	#N/A	23.89+/-0.03	#N/A	1046.51	2	524.263	#N/A	23.95	533721	244248	289473	15418	15418	0	#N/A	0.004457	VACV			FALSE
20221007_MS_MRMhr_DC24_VACV_37C_r3.wiff	37C_r3	KSYNYMLL	8	C48H74N10O14S	KSYNYM[+16]LL	KSYNYM(unimod:35)LL	KSYNYM[Oxi]LL	KSYNYM[Oxidation (M)]LL	0.9825	0.9951	#N/A	23.89+/-0.03	#N/A	1046.51	2	524.263	#N/A	23.95	762362	338635	423727	25584	25584	0	#N/A	0.007644	VACV			FALSE
20221007_MS_MRMhr_DC24_VACV_41C_r1.wiff	41C_r1	KSYNYMLL	8	C48H74N10O14S	KSYNYM[+16]LL	KSYNYM(unimod:35)LL	KSYNYM[Oxi]LL	KSYNYM[Oxidation (M)]LL	0.9551	0.9891	#N/A	23.89+/-0.03	#N/A	1046.51	2	524.263	#N/A	23.95	372404	178625	193779	16753	16753	0	#N/A	0.005248	VACV			FALSE
20221007_MS_MRMhr_DC24_VACV_41C_r2.wiff	41C_r2	KSYNYMLL	8	C48H74N10O14S	KSYNYM[+16]LL	KSYNYM(unimod:35)LL	KSYNYM[Oxi]LL	KSYNYM[Oxidation (M)]LL	0.9677	0.9896	#N/A	23.89+/-0.03	#N/A	1046.51	2	524.263	#N/A	23.95	758306	360395	397910	9880	9880	0	#N/A	0.006686	VACV			FALSE
20221007_MS_MRMhr_DC24_VACV_41C_r3.wiff	41C_r3	KSYNYMLL	8	C48H74N10O14S	KSYNYM[+16]LL	KSYNYM(unimod:35)LL	KSYNYM[Oxi]LL	KSYNYM[Oxidation (M)]LL	0.9824	0.99	#N/A	23.89+/-0.03	#N/A	1046.51	2	524.263	#N/A	23.95	998665	442838	555826	8208	8208	0	#N/A	0.00775	VACV			FALSE
20221007_MS_MRMhr_DC24_VACV_45C_r1.wiff	45C_r1	KSYNYMLL	8	C48H74N10O14S	KSYNYM[+16]LL	KSYNYM(unimod:35)LL	KSYNYM[Oxi]LL	KSYNYM[Oxidation (M)]LL	0.9706	0.9933	#N/A	23.89+/-0.03	#N/A	1046.51	2	524.263	#N/A	23.95	525823	266461	259362	19579	19579	0	#N/A	0.005488	VACV			FALSE
20221007_MS_MRMhr_DC24_VACV_45C_r2.wiff	45C_r2	KSYNYMLL	8	C48H74N10O14S	KSYNYM[+16]LL	KSYNYM(unimod:35)LL	KSYNYM[Oxi]LL	KSYNYM[Oxidation (M)]LL	0.965	0.9906	#N/A	23.89+/-0.03	#N/A	1046.51	2	524.263	#N/A	23.95	585092	282430	302662	19690	19690	0	#N/A	0.005731	VACV			FALSE
20221007_MS_MRMhr_DC24_VACV_45C_r3.wiff	45C_r3	KSYNYMLL	8	C48H74N10O14S	KSYNYM[+16]LL	KSYNYM(unimod:35)LL	KSYNYM[Oxi]LL	KSYNYM[Oxidation (M)]LL	0.9591	0.9927	#N/A	23.89+/-0.03	#N/A	1046.51	2	524.263	#N/A	23.95	737209	360031	377178	13767	13767	0	#N/A	0.006683	VACV			FALSE
20221007_MS_MRMhr_DC24_VACV_49C_r1.wiff	49C_r1	KSYNYMLL	8	C48H74N10O14S	KSYNYM[+16]LL	KSYNYM(unimod:35)LL	KSYNYM[Oxi]LL	KSYNYM[Oxidation (M)]LL	0.8595	0.9842	#N/A	23.89+/-0.03	#N/A	1046.51	2	524.263	#N/A	23.95	123892	61473	62419	4266	4266	0	#N/A	0.002057	VACV			FALSE
20221007_MS_MRMhr_DC24_VACV_49C_r2.wiff	49C_r2	KSYNYMLL	8	C48H74N10O14S	KSYNYM[+16]LL	KSYNYM(unimod:35)LL	KSYNYM[Oxi]LL	KSYNYM[Oxidation (M)]LL	0.9391	0.9944	#N/A	23.89+/-0.03	#N/A	1046.51	2	524.263	#N/A	23.95	498744	240825	257919	15762	15762	0	#N/A	0.006473	VACV			FALSE
20221007_MS_MRMhr_DC24_VACV_49C_r3.wiff	49C_r3	KSYNYMLL	8	C48H74N10O14S	KSYNYM[+16]LL	KSYNYM(unimod:35)LL	KSYNYM[Oxi]LL	KSYNYM[Oxidation (M)]LL	0.9764	0.9947	#N/A	23.89+/-0.03	#N/A	1046.51	2	524.263	#N/A	23.95	360791	170469	190322	10687	10687	0	#N/A	0.005836	VACV			FALSE
20221007_MS_MRMhr_DC24_VACV_53C_r1.wiff	53C_r1	KSYNYMLL	8	C48H74N10O14S	KSYNYM[+16]LL	KSYNYM(unimod:35)LL	KSYNYM[Oxi]LL	KSYNYM[Oxidation (M)]LL	0.9488	0.9855	#N/A	23.89+/-0.03	#N/A	1046.51	2	524.263	#N/A	23.95	312910	160612	152298	9403	9403	0	#N/A	0.005263	VACV			FALSE
20221007_MS_MRMhr_DC24_VACV_53C_r2.wiff	53C_r2	KSYNYMLL	8	C48H74N10O14S	KSYNYM[+16]LL	KSYNYM(unimod:35)LL	KSYNYM[Oxi]LL	KSYNYM[Oxidation (M)]LL	0.9594	0.9875	#N/A	23.89+/-0.03	#N/A	1046.51	2	524.263	#N/A	23.95	219227	108621	110606	4836	4836	0	#N/A	0.00512	VACV			FALSE
20221007_MS_MRMhr_DC24_VACV_53C_r3.wiff	53C_r3	KSYNYMLL	8	C48H74N10O14S	KSYNYM[+16]LL	KSYNYM(unimod:35)LL	KSYNYM[Oxi]LL	KSYNYM[Oxidation (M)]LL	0.977	0.9949	#N/A	23.89+/-0.03	#N/A	1046.51	2	524.263	#N/A	23.95	324700	170789	153911	7011	7011	0	#N/A	0.005912	VACV			FALSE
20221007_MS_MRMhr_DC24_VACV_57C_r1.wiff	57C_r1	KSYNYMLL	8	C48H74N10O14S	KSYNYM[+16]LL	KSYNYM(unimod:35)LL	KSYNYM[Oxi]LL	KSYNYM[Oxidation (M)]LL	0.79	0.9516	#N/A	23.89+/-0.03	#N/A	1046.51	2	524.263	#N/A	23.95	33722	27669	6052	2159	2159	0	#N/A	0.00102	VACV			FALSE
20221007_MS_MRMhr_DC24_VACV_57C_r2.wiff	57C_r2	KSYNYMLL	8	C48H74N10O14S	KSYNYM[+16]LL	KSYNYM(unimod:35)LL	KSYNYM[Oxi]LL	KSYNYM[Oxidation (M)]LL	0.7017	0.9719	#N/A	23.89+/-0.03	#N/A	1046.51	2	524.263	#N/A	23.95	33208	28918	4290	2886	2886	0	#N/A	0.001073	VACV			FALSE
20221007_MS_MRMhr_DC24_VACV_57C_r3.wiff	57C_r3	KSYNYMLL	8	C48H74N10O14S	KSYNYM[+16]LL	KSYNYM(unimod:35)LL	KSYNYM[Oxi]LL	KSYNYM[Oxidation (M)]LL	0.4967	0.9551	#N/A	23.89+/-0.03	#N/A	1046.51	2	524.263	#N/A	23.95	24456	22766	1690	3268	3268	0	#N/A	0.000926	VACV			FALSE
20221007_MS_MRMhr_DC24_VACV_61C_r1.wiff	61C_r1	KSYNYMLL	8	C48H74N10O14S	KSYNYM[+16]LL	KSYNYM(unimod:35)LL	KSYNYM[Oxi]LL	KSYNYM[Oxidation (M)]LL	0	0.9961	#N/A	23.89+/-0.03	#N/A	1046.51	2	524.263	#N/A	23.95	20001	20001	0	7877	7877	0	#N/A	0.000943	VACV			FALSE
20221007_MS_MRMhr_DC24_VACV_61C_r2.wiff	61C_r2	KSYNYMLL	8	C48H74N10O14S	KSYNYM[+16]LL	KSYNYM(unimod:35)LL	KSYNYM[Oxi]LL	KSYNYM[Oxidation (M)]LL	0	0.9216	#N/A	23.89+/-0.03	#N/A	1046.51	2	524.263	#N/A	23.95	31998	31998	0	571	571	0	#N/A	0.001534	VACV			FALSE
20221007_MS_MRMhr_DC24_VACV_61C_r3.wiff	61C_r3	KSYNYMLL	8	C48H74N10O14S	KSYNYM[+16]LL	KSYNYM(unimod:35)LL	KSYNYM[Oxi]LL	KSYNYM[Oxidation (M)]LL	0	0.9824	#N/A	23.89+/-0.03	#N/A	1046.51	2	524.263	#N/A	23.95	26288	26288	0	0	0	0	#N/A	0.001128	VACV			FALSE
20221007_MS_MRMhr_DC24_VACV_65C_r1.wiff	65C_r1	KSYNYMLL	8	C48H74N10O14S	KSYNYM[+16]LL	KSYNYM(unimod:35)LL	KSYNYM[Oxi]LL	KSYNYM[Oxidation (M)]LL	0	0.9568	#N/A	23.89+/-0.03	#N/A	1046.51	2	524.263	#N/A	23.95	25260	25260	0	1049	1049	0	#N/A	âˆž	VACV			FALSE
20221007_MS_MRMhr_DC24_VACV_65C_r2.wiff	65C_r2	KSYNYMLL	8	C48H74N10O14S	KSYNYM[+16]LL	KSYNYM(unimod:35)LL	KSYNYM[Oxi]LL	KSYNYM[Oxidation (M)]LL	0	0.9577	#N/A	23.89+/-0.03	#N/A	1046.51	2	524.263	#N/A	23.95	21641	21641	0	1371	1371	0	#N/A	âˆž	VACV			FALSE
20221007_MS_MRMhr_DC24_VACV_69C_r1.wiff	69C_r1	KSYNYMLL	8	C48H74N10O14S	KSYNYM[+16]LL	KSYNYM(unimod:35)LL	KSYNYM[Oxi]LL	KSYNYM[Oxidation (M)]LL	0	0.9638	#N/A	23.89+/-0.03	#N/A	1046.51	2	524.263	#N/A	23.95	21723	21723	0	0	0	0	#N/A	âˆž	VACV			FALSE
20221007_MS_MRMhr_DC24_VACV_69C_r2.wiff	69C_r2	KSYNYMLL	8	C48H74N10O14S	KSYNYM[+16]LL	KSYNYM(unimod:35)LL	KSYNYM[Oxi]LL	KSYNYM[Oxidation (M)]LL	0	0.9896	#N/A	23.89+/-0.03	#N/A	1046.51	2	524.263	#N/A	23.95	16974	16974	0	970	970	0	#N/A	âˆž	VACV			FALSE
20221007_MS_MRMhr_DC24_VACV_69C_r3.wiff	69C_r3	KSYNYMLL	8	C48H74N10O14S	KSYNYM[+16]LL	KSYNYM(unimod:35)LL	KSYNYM[Oxi]LL	KSYNYM[Oxidation (M)]LL	0	0.886	#N/A	23.89+/-0.03	#N/A	1046.51	2	524.263	#N/A	23.95	20242	20242	0	1350	1350	0	#N/A	âˆž	VACV			FALSE
20221007_MS_MRMhr_DC24_VACV_73C_r1.wiff	73C_r1	KSYNYMLL	8	C48H74N10O14S	KSYNYM[+16]LL	KSYNYM(unimod:35)LL	KSYNYM[Oxi]LL	KSYNYM[Oxidation (M)]LL	0	0.8737	#N/A	23.89+/-0.03	#N/A	1046.51	2	524.263	#N/A	23.95	18037	18037	0	0	0	0	#N/A	âˆž	VACV			FALSE
20221007_MS_MRMhr_DC24_VACV_73C_r2.wiff	73C_r2	KSYNYMLL	8	C48H74N10O14S	KSYNYM[+16]LL	KSYNYM(unimod:35)LL	KSYNYM[Oxi]LL	KSYNYM[Oxidation (M)]LL	0	0.9384	#N/A	23.89+/-0.03	#N/A	1046.51	2	524.263	#N/A	23.95	21482	21482	0	0	0	0	#N/A	âˆž	VACV			FALSE
20221007_MS_MRMhr_DC24_VACV_73C_r3.wiff	73C_r3	KSYNYMLL	8	C48H74N10O14S	KSYNYM[+16]LL	KSYNYM(unimod:35)LL	KSYNYM[Oxi]LL	KSYNYM[Oxidation (M)]LL	0	0.9469	#N/A	23.89+/-0.03	#N/A	1046.51	2	524.263	#N/A	23.95	21000	21000	0	308	308	0	#N/A	âˆž	VACV			FALSE
20221010_MS_zenoSWATH_DC24_VACV_37C_r1.wiff	SWATH_r1	YSQVNKRYI	9	C53H82N14O16	YSQ[+1]VNKRYI	YSQ(unimod:7)VNKRYI	YSQ[Dea]VNKRYI	YSQ[Deamidated (NQ)]VNKRYI	0.1965	0.7008	#N/A	21.37+/-0.11	#N/A	1170.6	2	586.309	#N/A	21.57	4237	3327	909	0	0	0	#N/A	3.1e-05	VACV			FALSE
20221010_MS_zenoSWATH_DC24_VACV_37C_r2.wiff	SWATH_r2	YSQVNKRYI	9	C53H82N14O16	YSQ[+1]VNKRYI	YSQ(unimod:7)VNKRYI	YSQ[Dea]VNKRYI	YSQ[Deamidated (NQ)]VNKRYI	0.6121	0.6287	#N/A	21.37+/-0.11	#N/A	1170.6	2	586.309	#N/A	21.57	9524	8723	801	0	0	0	#N/A	9.9e-05	VACV			FALSE
20221010_MS_zenoSWATH_DC24_VACV_37C_r3.wiff	SWATH_r3	YSQVNKRYI	9	C53H82N14O16	YSQ[+1]VNKRYI	YSQ(unimod:7)VNKRYI	YSQ[Dea]VNKRYI	YSQ[Deamidated (NQ)]VNKRYI	0.4216	0.8009	#N/A	21.37+/-0.11	#N/A	1170.6	2	586.309	#N/A	21.57	3882	2822	1060	0	0	0	#N/A	3.4e-05	VACV			FALSE
20221007_MS_MRMhr_DC24_VACV_37C_r1.wiff	37C_r1	YSQVNKRYI	9	C53H82N14O16	YSQ[+1]VNKRYI	YSQ(unimod:7)VNKRYI	YSQ[Dea]VNKRYI	YSQ[Deamidated (NQ)]VNKRYI	0	0.7179	#N/A	21.37+/-0.11	#N/A	1170.6	2	586.309	#N/A	21.57	5256	5256	#N/A	0	0	#N/A	#N/A	4.4e-05	VACV			FALSE
20221007_MS_MRMhr_DC24_VACV_37C_r2.wiff	37C_r2	YSQVNKRYI	9	C53H82N14O16	YSQ[+1]VNKRYI	YSQ(unimod:7)VNKRYI	YSQ[Dea]VNKRYI	YSQ[Deamidated (NQ)]VNKRYI	0	0.6934	#N/A	21.37+/-0.11	#N/A	1170.6	2	586.309	#N/A	21.57	18562	18562	#N/A	0	0	#N/A	#N/A	0.000155	VACV			FALSE
20221007_MS_MRMhr_DC24_VACV_37C_r3.wiff	37C_r3	YSQVNKRYI	9	C53H82N14O16	YSQ[+1]VNKRYI	YSQ(unimod:7)VNKRYI	YSQ[Dea]VNKRYI	YSQ[Deamidated (NQ)]VNKRYI	0	0.7574	#N/A	21.37+/-0.11	#N/A	1170.6	2	586.309	#N/A	21.57	4553	4553	#N/A	0	0	#N/A	#N/A	4.6e-05	VACV			FALSE
20221007_MS_MRMhr_DC24_VACV_41C_r1.wiff	41C_r1	YSQVNKRYI	9	C53H82N14O16	YSQ[+1]VNKRYI	YSQ(unimod:7)VNKRYI	YSQ[Dea]VNKRYI	YSQ[Deamidated (NQ)]VNKRYI	0	0.7545	#N/A	21.37+/-0.11	#N/A	1170.6	2	586.309	#N/A	21.57	6601	6601	#N/A	108	108	#N/A	#N/A	9.3e-05	VACV			FALSE
20221007_MS_MRMhr_DC24_VACV_41C_r2.wiff	41C_r2	YSQVNKRYI	9	C53H82N14O16	YSQ[+1]VNKRYI	YSQ(unimod:7)VNKRYI	YSQ[Dea]VNKRYI	YSQ[Deamidated (NQ)]VNKRYI	0	0.7331	#N/A	21.37+/-0.11	#N/A	1170.6	2	586.309	#N/A	21.57	14872	14872	#N/A	0	0	#N/A	#N/A	0.000131	VACV			FALSE
20221007_MS_MRMhr_DC24_VACV_41C_r3.wiff	41C_r3	YSQVNKRYI	9	C53H82N14O16	YSQ[+1]VNKRYI	YSQ(unimod:7)VNKRYI	YSQ[Dea]VNKRYI	YSQ[Deamidated (NQ)]VNKRYI	0	0.709	#N/A	21.37+/-0.11	#N/A	1170.6	2	586.309	#N/A	21.57	10081	10081	#N/A	138	138	#N/A	#N/A	7.8e-05	VACV			FALSE
20221007_MS_MRMhr_DC24_VACV_45C_r1.wiff	45C_r1	YSQVNKRYI	9	C53H82N14O16	YSQ[+1]VNKRYI	YSQ(unimod:7)VNKRYI	YSQ[Dea]VNKRYI	YSQ[Deamidated (NQ)]VNKRYI	0	0.7124	#N/A	21.37+/-0.11	#N/A	1170.6	2	586.309	#N/A	21.57	5072	5072	#N/A	282	282	#N/A	#N/A	5.3e-05	VACV			FALSE
20221007_MS_MRMhr_DC24_VACV_45C_r2.wiff	45C_r2	YSQVNKRYI	9	C53H82N14O16	YSQ[+1]VNKRYI	YSQ(unimod:7)VNKRYI	YSQ[Dea]VNKRYI	YSQ[Deamidated (NQ)]VNKRYI	0	0.7157	#N/A	21.37+/-0.11	#N/A	1170.6	2	586.309	#N/A	21.57	11566	11566	#N/A	0	0	#N/A	#N/A	0.000113	VACV			FALSE
20221007_MS_MRMhr_DC24_VACV_45C_r3.wiff	45C_r3	YSQVNKRYI	9	C53H82N14O16	YSQ[+1]VNKRYI	YSQ(unimod:7)VNKRYI	YSQ[Dea]VNKRYI	YSQ[Deamidated (NQ)]VNKRYI	0	0.716	#N/A	21.37+/-0.11	#N/A	1170.6	2	586.309	#N/A	21.57	9010	9010	#N/A	0	0	#N/A	#N/A	8.2e-05	VACV			FALSE
20221007_MS_MRMhr_DC24_VACV_49C_r1.wiff	49C_r1	YSQVNKRYI	9	C53H82N14O16	YSQ[+1]VNKRYI	YSQ(unimod:7)VNKRYI	YSQ[Dea]VNKRYI	YSQ[Deamidated (NQ)]VNKRYI	0	0.677	#N/A	21.37+/-0.11	#N/A	1170.6	2	586.309	#N/A	21.57	11954	11954	#N/A	254	254	#N/A	#N/A	0.000198	VACV			FALSE
20221007_MS_MRMhr_DC24_VACV_49C_r2.wiff	49C_r2	YSQVNKRYI	9	C53H82N14O16	YSQ[+1]VNKRYI	YSQ(unimod:7)VNKRYI	YSQ[Dea]VNKRYI	YSQ[Deamidated (NQ)]VNKRYI	0	0.7787	#N/A	21.37+/-0.11	#N/A	1170.6	2	586.309	#N/A	21.57	6168	6168	#N/A	0	0	#N/A	#N/A	8e-05	VACV			FALSE
20221007_MS_MRMhr_DC24_VACV_49C_r3.wiff	49C_r3	YSQVNKRYI	9	C53H82N14O16	YSQ[+1]VNKRYI	YSQ(unimod:7)VNKRYI	YSQ[Dea]VNKRYI	YSQ[Deamidated (NQ)]VNKRYI	0	0.7623	#N/A	21.37+/-0.11	#N/A	1170.6	2	586.309	#N/A	21.57	6352	6352	#N/A	0	0	#N/A	#N/A	0.000103	VACV			FALSE
20221007_MS_MRMhr_DC24_VACV_53C_r1.wiff	53C_r1	YSQVNKRYI	9	C53H82N14O16	YSQ[+1]VNKRYI	YSQ(unimod:7)VNKRYI	YSQ[Dea]VNKRYI	YSQ[Deamidated (NQ)]VNKRYI	0	0.7304	#N/A	21.37+/-0.11	#N/A	1170.6	2	586.309	#N/A	21.57	4441	4441	#N/A	0	0	#N/A	#N/A	7.5e-05	VACV			FALSE
20221007_MS_MRMhr_DC24_VACV_53C_r2.wiff	53C_r2	YSQVNKRYI	9	C53H82N14O16	YSQ[+1]VNKRYI	YSQ(unimod:7)VNKRYI	YSQ[Dea]VNKRYI	YSQ[Deamidated (NQ)]VNKRYI	0	0.7093	#N/A	21.37+/-0.11	#N/A	1170.6	2	586.309	#N/A	21.57	8051	8051	#N/A	863	863	#N/A	#N/A	0.000188	VACV			FALSE
20221007_MS_MRMhr_DC24_VACV_53C_r3.wiff	53C_r3	YSQVNKRYI	9	C53H82N14O16	YSQ[+1]VNKRYI	YSQ(unimod:7)VNKRYI	YSQ[Dea]VNKRYI	YSQ[Deamidated (NQ)]VNKRYI	0	0.6824	#N/A	21.37+/-0.11	#N/A	1170.6	2	586.309	#N/A	21.57	4180	4180	#N/A	201	201	#N/A	#N/A	7.6e-05	VACV			FALSE
20221007_MS_MRMhr_DC24_VACV_57C_r1.wiff	57C_r1	YSQVNKRYI	9	C53H82N14O16	YSQ[+1]VNKRYI	YSQ(unimod:7)VNKRYI	YSQ[Dea]VNKRYI	YSQ[Deamidated (NQ)]VNKRYI	0	0.8112	#N/A	21.37+/-0.11	#N/A	1170.6	2	586.309	#N/A	21.57	9883	9883	#N/A	0	0	#N/A	#N/A	0.000299	VACV			FALSE
20221007_MS_MRMhr_DC24_VACV_57C_r2.wiff	57C_r2	YSQVNKRYI	9	C53H82N14O16	YSQ[+1]VNKRYI	YSQ(unimod:7)VNKRYI	YSQ[Dea]VNKRYI	YSQ[Deamidated (NQ)]VNKRYI	0	0.7023	#N/A	21.37+/-0.11	#N/A	1170.6	2	586.309	#N/A	21.57	3935	3935	#N/A	0	0	#N/A	#N/A	0.000127	VACV			FALSE
20221007_MS_MRMhr_DC24_VACV_57C_r3.wiff	57C_r3	YSQVNKRYI	9	C53H82N14O16	YSQ[+1]VNKRYI	YSQ(unimod:7)VNKRYI	YSQ[Dea]VNKRYI	YSQ[Deamidated (NQ)]VNKRYI	0	0.7232	#N/A	21.37+/-0.11	#N/A	1170.6	2	586.309	#N/A	21.57	10265	10265	#N/A	0	0	#N/A	#N/A	0.000389	VACV			FALSE
20221007_MS_MRMhr_DC24_VACV_61C_r1.wiff	61C_r1	YSQVNKRYI	9	C53H82N14O16	YSQ[+1]VNKRYI	YSQ(unimod:7)VNKRYI	YSQ[Dea]VNKRYI	YSQ[Deamidated (NQ)]VNKRYI	0	0.7705	#N/A	21.37+/-0.11	#N/A	1170.6	2	586.309	#N/A	21.57	8153	8153	#N/A	0	0	#N/A	#N/A	0.000384	VACV			FALSE
20221007_MS_MRMhr_DC24_VACV_61C_r2.wiff	61C_r2	YSQVNKRYI	9	C53H82N14O16	YSQ[+1]VNKRYI	YSQ(unimod:7)VNKRYI	YSQ[Dea]VNKRYI	YSQ[Deamidated (NQ)]VNKRYI	0	0.7015	#N/A	21.37+/-0.11	#N/A	1170.6	2	586.309	#N/A	21.57	6302	6302	#N/A	0	0	#N/A	#N/A	0.000302	VACV			FALSE
20221007_MS_MRMhr_DC24_VACV_61C_r3.wiff	61C_r3	YSQVNKRYI	9	C53H82N14O16	YSQ[+1]VNKRYI	YSQ(unimod:7)VNKRYI	YSQ[Dea]VNKRYI	YSQ[Deamidated (NQ)]VNKRYI	0	0.8277	#N/A	21.37+/-0.11	#N/A	1170.6	2	586.309	#N/A	21.57	6268	6268	#N/A	0	0	#N/A	#N/A	0.000269	VACV			FALSE
20221007_MS_MRMhr_DC24_VACV_65C_r1.wiff	65C_r1	YSQVNKRYI	9	C53H82N14O16	YSQ[+1]VNKRYI	YSQ(unimod:7)VNKRYI	YSQ[Dea]VNKRYI	YSQ[Deamidated (NQ)]VNKRYI	0	0.8262	#N/A	21.37+/-0.11	#N/A	1170.6	2	586.309	#N/A	21.57	4096	4096	#N/A	0	0	#N/A	#N/A	âˆž	VACV			FALSE
20221007_MS_MRMhr_DC24_VACV_65C_r2.wiff	65C_r2	YSQVNKRYI	9	C53H82N14O16	YSQ[+1]VNKRYI	YSQ(unimod:7)VNKRYI	YSQ[Dea]VNKRYI	YSQ[Deamidated (NQ)]VNKRYI	0	0.9422	#N/A	21.37+/-0.11	#N/A	1170.6	2	586.309	#N/A	21.57	1965	1965	#N/A	0	0	#N/A	#N/A	âˆž	VACV			FALSE
20221007_MS_MRMhr_DC24_VACV_69C_r1.wiff	69C_r1	YSQVNKRYI	9	C53H82N14O16	YSQ[+1]VNKRYI	YSQ(unimod:7)VNKRYI	YSQ[Dea]VNKRYI	YSQ[Deamidated (NQ)]VNKRYI	0	0.616	#N/A	21.37+/-0.11	#N/A	1170.6	2	586.309	#N/A	21.57	694	694	#N/A	2015	2015	#N/A	#N/A	âˆž	VACV			FALSE
20221007_MS_MRMhr_DC24_VACV_69C_r2.wiff	69C_r2	YSQVNKRYI	9	C53H82N14O16	YSQ[+1]VNKRYI	YSQ(unimod:7)VNKRYI	YSQ[Dea]VNKRYI	YSQ[Deamidated (NQ)]VNKRYI	0	0.9209	#N/A	21.37+/-0.11	#N/A	1170.6	2	586.309	#N/A	21.57	1527	1527	#N/A	0	0	#N/A	#N/A	âˆž	VACV			FALSE
20221007_MS_MRMhr_DC24_VACV_69C_r3.wiff	69C_r3	YSQVNKRYI	9	C53H82N14O16	YSQ[+1]VNKRYI	YSQ(unimod:7)VNKRYI	YSQ[Dea]VNKRYI	YSQ[Deamidated (NQ)]VNKRYI	0	0.8613	#N/A	21.37+/-0.11	#N/A	1170.6	2	586.309	#N/A	21.57	1253	1253	#N/A	444	444	#N/A	#N/A	âˆž	VACV			FALSE
20221007_MS_MRMhr_DC24_VACV_73C_r1.wiff	73C_r1	YSQVNKRYI	9	C53H82N14O16	YSQ[+1]VNKRYI	YSQ(unimod:7)VNKRYI	YSQ[Dea]VNKRYI	YSQ[Deamidated (NQ)]VNKRYI	0	0	#N/A	21.37+/-0.11	#N/A	1170.6	2	586.309	#N/A	21.57	#N/A	#N/A	#N/A	#N/A	#N/A	#N/A	#N/A	#N/A	VACV			FALSE
20221007_MS_MRMhr_DC24_VACV_73C_r2.wiff	73C_r2	YSQVNKRYI	9	C53H82N14O16	YSQ[+1]VNKRYI	YSQ(unimod:7)VNKRYI	YSQ[Dea]VNKRYI	YSQ[Deamidated (NQ)]VNKRYI	0	0	#N/A	21.37+/-0.11	#N/A	1170.6	2	586.309	#N/A	21.57	#N/A	#N/A	#N/A	#N/A	#N/A	#N/A	#N/A	#N/A	VACV			FALSE
20221007_MS_MRMhr_DC24_VACV_73C_r3.wiff	73C_r3	YSQVNKRYI	9	C53H82N14O16	YSQ[+1]VNKRYI	YSQ(unimod:7)VNKRYI	YSQ[Dea]VNKRYI	YSQ[Deamidated (NQ)]VNKRYI	0	0	#N/A	21.37+/-0.11	#N/A	1170.6	2	586.309	#N/A	21.57	#N/A	#N/A	#N/A	#N/A	#N/A	#N/A	#N/A	#N/A	VACV			FALSE
20221010_MS_zenoSWATH_DC24_VACV_37C_r1.wiff	SWATH_r1	YSLPNAGDVI	10	C47H73N11O16	YSLPNAGDVI	YSLPNAGDVI	YSLPNAGDVI	YSLPNAGDVI	0.9818	0.995	#N/A	32.06+/-0.13	#N/A	1047.52	2	524.769	#N/A	32.05	1319468	441885	877583	3456	3456	0	#N/A	0.009614	VACV			FALSE
20221010_MS_zenoSWATH_DC24_VACV_37C_r2.wiff	SWATH_r2	YSLPNAGDVI	10	C47H73N11O16	YSLPNAGDVI	YSLPNAGDVI	YSLPNAGDVI	YSLPNAGDVI	0.9738	0.9964	#N/A	32.06+/-0.13	#N/A	1047.52	2	524.769	#N/A	32.05	1007079	334179	672900	2986	2986	0	#N/A	0.010435	VACV			FALSE
20221010_MS_zenoSWATH_DC24_VACV_37C_r3.wiff	SWATH_r3	YSLPNAGDVI	10	C47H73N11O16	YSLPNAGDVI	YSLPNAGDVI	YSLPNAGDVI	YSLPNAGDVI	0.9739	0.9978	#N/A	32.06+/-0.13	#N/A	1047.52	2	524.769	#N/A	32.05	1051498	337474	714025	5649	5649	0	#N/A	0.009212	VACV			FALSE
20221007_MS_MRMhr_DC24_VACV_37C_r1.wiff	37C_r1	YSLPNAGDVI	10	C47H73N11O16	YSLPNAGDVI	YSLPNAGDVI	YSLPNAGDVI	YSLPNAGDVI	0.9721	0.9974	#N/A	32.06+/-0.13	#N/A	1047.52	2	524.769	#N/A	32.05	1476424	752800	723625	9689	9689	0	#N/A	0.012464	VACV			FALSE
20221007_MS_MRMhr_DC24_VACV_37C_r2.wiff	37C_r2	YSLPNAGDVI	10	C47H73N11O16	YSLPNAGDVI	YSLPNAGDVI	YSLPNAGDVI	YSLPNAGDVI	0.9693	0.996	#N/A	32.06+/-0.13	#N/A	1047.52	2	524.769	#N/A	32.05	1632566	840230	792336	9258	9258	0	#N/A	0.013634	VACV			FALSE
20221007_MS_MRMhr_DC24_VACV_37C_r3.wiff	37C_r3	YSLPNAGDVI	10	C47H73N11O16	YSLPNAGDVI	YSLPNAGDVI	YSLPNAGDVI	YSLPNAGDVI	0.9747	0.9981	#N/A	32.06+/-0.13	#N/A	1047.52	2	524.769	#N/A	32.05	1397678	699318	698360	0	0	0	#N/A	0.014013	VACV			FALSE
20221007_MS_MRMhr_DC24_VACV_41C_r1.wiff	41C_r1	YSLPNAGDVI	10	C47H73N11O16	YSLPNAGDVI	YSLPNAGDVI	YSLPNAGDVI	YSLPNAGDVI	0.9922	0.9971	#N/A	32.06+/-0.13	#N/A	1047.52	2	524.769	#N/A	32.05	1319115	667173	651942	12997	12997	0	#N/A	0.018589	VACV			FALSE
20221007_MS_MRMhr_DC24_VACV_41C_r2.wiff	41C_r2	YSLPNAGDVI	10	C47H73N11O16	YSLPNAGDVI	YSLPNAGDVI	YSLPNAGDVI	YSLPNAGDVI	0.9741	0.9982	#N/A	32.06+/-0.13	#N/A	1047.52	2	524.769	#N/A	32.05	1586006	831264	754743	1458	1458	0	#N/A	0.013985	VACV			FALSE
20221007_MS_MRMhr_DC24_VACV_41C_r3.wiff	41C_r3	YSLPNAGDVI	10	C47H73N11O16	YSLPNAGDVI	YSLPNAGDVI	YSLPNAGDVI	YSLPNAGDVI	0.9805	0.995	#N/A	32.06+/-0.13	#N/A	1047.52	2	524.769	#N/A	32.05	1712058	828107	883951	15907	15907	0	#N/A	0.013286	VACV			FALSE
20221007_MS_MRMhr_DC24_VACV_45C_r1.wiff	45C_r1	YSLPNAGDVI	10	C47H73N11O16	YSLPNAGDVI	YSLPNAGDVI	YSLPNAGDVI	YSLPNAGDVI	0.9623	0.9951	#N/A	32.06+/-0.13	#N/A	1047.52	2	524.769	#N/A	32.05	1275469	634628	640841	12728	12728	0	#N/A	0.013311	VACV			FALSE
20221007_MS_MRMhr_DC24_VACV_45C_r2.wiff	45C_r2	YSLPNAGDVI	10	C47H73N11O16	YSLPNAGDVI	YSLPNAGDVI	YSLPNAGDVI	YSLPNAGDVI	0.9731	0.9953	#N/A	32.06+/-0.13	#N/A	1047.52	2	524.769	#N/A	32.05	1378355	697988	680366	12117	12117	0	#N/A	0.013501	VACV			FALSE
20221007_MS_MRMhr_DC24_VACV_45C_r3.wiff	45C_r3	YSLPNAGDVI	10	C47H73N11O16	YSLPNAGDVI	YSLPNAGDVI	YSLPNAGDVI	YSLPNAGDVI	0.9739	0.9975	#N/A	32.06+/-0.13	#N/A	1047.52	2	524.769	#N/A	32.05	1412554	701287	711267	0	0	0	#N/A	0.012805	VACV			FALSE
20221007_MS_MRMhr_DC24_VACV_49C_r1.wiff	49C_r1	YSLPNAGDVI	10	C47H73N11O16	YSLPNAGDVI	YSLPNAGDVI	YSLPNAGDVI	YSLPNAGDVI	0.978	0.9985	#N/A	32.06+/-0.13	#N/A	1047.52	2	524.769	#N/A	32.05	950150	539168	410982	5478	5478	0	#N/A	0.015773	VACV			FALSE
20221007_MS_MRMhr_DC24_VACV_49C_r2.wiff	49C_r2	YSLPNAGDVI	10	C47H73N11O16	YSLPNAGDVI	YSLPNAGDVI	YSLPNAGDVI	YSLPNAGDVI	0.9773	0.9959	#N/A	32.06+/-0.13	#N/A	1047.52	2	524.769	#N/A	32.05	1094564	562115	532449	12195	12195	0	#N/A	0.014207	VACV			FALSE
20221007_MS_MRMhr_DC24_VACV_49C_r3.wiff	49C_r3	YSLPNAGDVI	10	C47H73N11O16	YSLPNAGDVI	YSLPNAGDVI	YSLPNAGDVI	YSLPNAGDVI	0.9749	0.9976	#N/A	32.06+/-0.13	#N/A	1047.52	2	524.769	#N/A	32.05	1015661	507447	508213	1741	1741	0	#N/A	0.016429	VACV			FALSE
20221007_MS_MRMhr_DC24_VACV_53C_r1.wiff	53C_r1	YSLPNAGDVI	10	C47H73N11O16	YSLPNAGDVI	YSLPNAGDVI	YSLPNAGDVI	YSLPNAGDVI	0.9774	0.9973	#N/A	32.06+/-0.13	#N/A	1047.52	2	524.769	#N/A	32.05	682457	338867	343591	2997	2997	0	#N/A	0.011478	VACV			FALSE
20221007_MS_MRMhr_DC24_VACV_53C_r2.wiff	53C_r2	YSLPNAGDVI	10	C47H73N11O16	YSLPNAGDVI	YSLPNAGDVI	YSLPNAGDVI	YSLPNAGDVI	0.965	0.9909	#N/A	32.06+/-0.13	#N/A	1047.52	2	524.769	#N/A	32.05	888705	441650	447055	5775	5775	0	#N/A	0.020755	VACV			FALSE
20221007_MS_MRMhr_DC24_VACV_53C_r3.wiff	53C_r3	YSLPNAGDVI	10	C47H73N11O16	YSLPNAGDVI	YSLPNAGDVI	YSLPNAGDVI	YSLPNAGDVI	0.9542	0.9947	#N/A	32.06+/-0.13	#N/A	1047.52	2	524.769	#N/A	32.05	883714	424010	459704	4973	4973	0	#N/A	0.01609	VACV			FALSE
20221007_MS_MRMhr_DC24_VACV_57C_r1.wiff	57C_r1	YSLPNAGDVI	10	C47H73N11O16	YSLPNAGDVI	YSLPNAGDVI	YSLPNAGDVI	YSLPNAGDVI	0.9384	0.9626	#N/A	32.06+/-0.13	#N/A	1047.52	2	524.769	#N/A	32.05	162601	79316	83285	4134	4134	0	#N/A	0.004918	VACV			FALSE
20221007_MS_MRMhr_DC24_VACV_57C_r2.wiff	57C_r2	YSLPNAGDVI	10	C47H73N11O16	YSLPNAGDVI	YSLPNAGDVI	YSLPNAGDVI	YSLPNAGDVI	0.8688	0.9557	#N/A	32.06+/-0.13	#N/A	1047.52	2	524.769	#N/A	32.05	106314	61972	44342	1908	1908	0	#N/A	0.003436	VACV			FALSE
20221007_MS_MRMhr_DC24_VACV_57C_r3.wiff	57C_r3	YSLPNAGDVI	10	C47H73N11O16	YSLPNAGDVI	YSLPNAGDVI	YSLPNAGDVI	YSLPNAGDVI	0.9045	0.9468	#N/A	32.06+/-0.13	#N/A	1047.52	2	524.769	#N/A	32.05	102037	54001	48036	4665	4665	0	#N/A	0.003866	VACV			FALSE
20221007_MS_MRMhr_DC24_VACV_61C_r1.wiff	61C_r1	YSLPNAGDVI	10	C47H73N11O16	YSLPNAGDVI	YSLPNAGDVI	YSLPNAGDVI	YSLPNAGDVI	0.775	0.8336	#N/A	32.06+/-0.13	#N/A	1047.52	2	524.769	#N/A	32.05	27194	21969	5225	2967	2967	0	#N/A	0.001282	VACV			FALSE
20221007_MS_MRMhr_DC24_VACV_61C_r2.wiff	61C_r2	YSLPNAGDVI	10	C47H73N11O16	YSLPNAGDVI	YSLPNAGDVI	YSLPNAGDVI	YSLPNAGDVI	0.6651	0.8908	#N/A	32.06+/-0.13	#N/A	1047.52	2	524.769	#N/A	32.05	18586	16965	1621	0	0	0	#N/A	0.000891	VACV			FALSE
20221007_MS_MRMhr_DC24_VACV_61C_r3.wiff	61C_r3	YSLPNAGDVI	10	C47H73N11O16	YSLPNAGDVI	YSLPNAGDVI	YSLPNAGDVI	YSLPNAGDVI	0.7003	0.8245	#N/A	32.06+/-0.13	#N/A	1047.52	2	524.769	#N/A	32.05	22165	16834	5331	3872	3872	0	#N/A	0.000951	VACV			FALSE
20221007_MS_MRMhr_DC24_VACV_65C_r1.wiff	65C_r1	YSLPNAGDVI	10	C47H73N11O16	YSLPNAGDVI	YSLPNAGDVI	YSLPNAGDVI	YSLPNAGDVI	0	0.4653	#N/A	32.06+/-0.13	#N/A	1047.52	2	524.769	#N/A	32.05	7222	7222	0	230	230	0	#N/A	âˆž	VACV			FALSE
20221007_MS_MRMhr_DC24_VACV_65C_r2.wiff	65C_r2	YSLPNAGDVI	10	C47H73N11O16	YSLPNAGDVI	YSLPNAGDVI	YSLPNAGDVI	YSLPNAGDVI	0	0.5301	#N/A	32.06+/-0.13	#N/A	1047.52	2	524.769	#N/A	32.05	3667	3667	0	1556	1556	0	#N/A	âˆž	VACV			FALSE
20221007_MS_MRMhr_DC24_VACV_69C_r1.wiff	69C_r1	YSLPNAGDVI	10	C47H73N11O16	YSLPNAGDVI	YSLPNAGDVI	YSLPNAGDVI	YSLPNAGDVI	0	0.5946	#N/A	32.06+/-0.13	#N/A	1047.52	2	524.769	#N/A	32.05	8083	8083	0	3787	3787	0	#N/A	âˆž	VACV			FALSE
20221007_MS_MRMhr_DC24_VACV_69C_r2.wiff	69C_r2	YSLPNAGDVI	10	C47H73N11O16	YSLPNAGDVI	YSLPNAGDVI	YSLPNAGDVI	YSLPNAGDVI	0.4737	0.5391	#N/A	32.06+/-0.13	#N/A	1047.52	2	524.769	#N/A	32.05	6729	6070	659	4343	4343	0	#N/A	âˆž	VACV			FALSE
20221007_MS_MRMhr_DC24_VACV_69C_r3.wiff	69C_r3	YSLPNAGDVI	10	C47H73N11O16	YSLPNAGDVI	YSLPNAGDVI	YSLPNAGDVI	YSLPNAGDVI	0.4737	0.5397	#N/A	32.06+/-0.13	#N/A	1047.52	2	524.769	#N/A	32.05	8481	4268	4212	4471	4471	0	#N/A	âˆž	VACV			FALSE
20221007_MS_MRMhr_DC24_VACV_73C_r1.wiff	73C_r1	YSLPNAGDVI	10	C47H73N11O16	YSLPNAGDVI	YSLPNAGDVI	YSLPNAGDVI	YSLPNAGDVI	0	0.4166	#N/A	32.06+/-0.13	#N/A	1047.52	2	524.769	#N/A	32.05	3178	3178	0	5078	5078	0	#N/A	âˆž	VACV			FALSE
20221007_MS_MRMhr_DC24_VACV_73C_r2.wiff	73C_r2	YSLPNAGDVI	10	C47H73N11O16	YSLPNAGDVI	YSLPNAGDVI	YSLPNAGDVI	YSLPNAGDVI	0.4737	0.4267	#N/A	32.06+/-0.13	#N/A	1047.52	2	524.769	#N/A	32.05	28871	28375	496	1783	1783	0	#N/A	âˆž	VACV			FALSE
20221007_MS_MRMhr_DC24_VACV_73C_r3.wiff	73C_r3	YSLPNAGDVI	10	C47H73N11O16	YSLPNAGDVI	YSLPNAGDVI	YSLPNAGDVI	YSLPNAGDVI	0	0.3431	#N/A	32.06+/-0.13	#N/A	1047.52	2	524.769	#N/A	32.05	21967	21967	0	0	0	0	#N/A	âˆž	VACV			FALSE
20221010_MS_zenoSWATH_DC24_VACV_37C_r1.wiff	SWATH_r1	YSLPNAGDVI	10	C47H72N10O17	YSLPN[+1]AGDVI	YSLPN(unimod:7)AGDVI	YSLPN[Dea]AGDVI	YSLPN[Deamidated (NQ)]AGDVI	0.8412	0.9204	#N/A	32.02+/-0.1	#N/A	1048.51	2	525.261	#N/A	32	248223	202655	45568	0	0	0	#N/A	0.001809	VACV			FALSE
20221010_MS_zenoSWATH_DC24_VACV_37C_r2.wiff	SWATH_r2	YSLPNAGDVI	10	C47H72N10O17	YSLPN[+1]AGDVI	YSLPN(unimod:7)AGDVI	YSLPN[Dea]AGDVI	YSLPN[Deamidated (NQ)]AGDVI	0.7365	0.9069	#N/A	32.02+/-0.1	#N/A	1048.51	2	525.261	#N/A	32	202241	135348	66894	0	0	0	#N/A	0.002095	VACV			FALSE
20221010_MS_zenoSWATH_DC24_VACV_37C_r3.wiff	SWATH_r3	YSLPNAGDVI	10	C47H72N10O17	YSLPN[+1]AGDVI	YSLPN(unimod:7)AGDVI	YSLPN[Dea]AGDVI	YSLPN[Deamidated (NQ)]AGDVI	0.7948	0.9141	#N/A	32.02+/-0.1	#N/A	1048.51	2	525.261	#N/A	32	227549	152918	74631	0	0	0	#N/A	0.001993	VACV			FALSE
20221007_MS_MRMhr_DC24_VACV_37C_r1.wiff	37C_r1	YSLPNAGDVI	10	C47H72N10O17	YSLPN[+1]AGDVI	YSLPN(unimod:7)AGDVI	YSLPN[Dea]AGDVI	YSLPN[Deamidated (NQ)]AGDVI	0.8116	0.8979	#N/A	32.02+/-0.1	#N/A	1048.51	2	525.261	#N/A	32	418011	329257	88754	7677	7677	0	#N/A	0.003529	VACV			FALSE
20221007_MS_MRMhr_DC24_VACV_37C_r2.wiff	37C_r2	YSLPNAGDVI	10	C47H72N10O17	YSLPN[+1]AGDVI	YSLPN(unimod:7)AGDVI	YSLPN[Dea]AGDVI	YSLPN[Deamidated (NQ)]AGDVI	0.8921	0.9215	#N/A	32.02+/-0.1	#N/A	1048.51	2	525.261	#N/A	32	472666	343042	129624	0	0	0	#N/A	0.003947	VACV			FALSE
20221007_MS_MRMhr_DC24_VACV_37C_r3.wiff	37C_r3	YSLPNAGDVI	10	C47H72N10O17	YSLPN[+1]AGDVI	YSLPN(unimod:7)AGDVI	YSLPN[Dea]AGDVI	YSLPN[Deamidated (NQ)]AGDVI	0.9101	0.9197	#N/A	32.02+/-0.1	#N/A	1048.51	2	525.261	#N/A	32	504347	318271	186076	0	0	0	#N/A	0.005057	VACV			FALSE
20221007_MS_MRMhr_DC24_VACV_41C_r1.wiff	41C_r1	YSLPNAGDVI	10	C47H72N10O17	YSLPN[+1]AGDVI	YSLPN(unimod:7)AGDVI	YSLPN[Dea]AGDVI	YSLPN[Deamidated (NQ)]AGDVI	0.8707	0.9217	#N/A	32.02+/-0.1	#N/A	1048.51	2	525.261	#N/A	32	565779	299225	266553	0	0	0	#N/A	0.007973	VACV			FALSE
20221007_MS_MRMhr_DC24_VACV_41C_r2.wiff	41C_r2	YSLPNAGDVI	10	C47H72N10O17	YSLPN[+1]AGDVI	YSLPN(unimod:7)AGDVI	YSLPN[Dea]AGDVI	YSLPN[Deamidated (NQ)]AGDVI	0.8911	0.9173	#N/A	32.02+/-0.1	#N/A	1048.51	2	525.261	#N/A	32	460370	354165	106205	0	0	0	#N/A	0.004059	VACV			FALSE
20221007_MS_MRMhr_DC24_VACV_41C_r3.wiff	41C_r3	YSLPNAGDVI	10	C47H72N10O17	YSLPN[+1]AGDVI	YSLPN(unimod:7)AGDVI	YSLPN[Dea]AGDVI	YSLPN[Deamidated (NQ)]AGDVI	0.8782	0.9164	#N/A	32.02+/-0.1	#N/A	1048.51	2	525.261	#N/A	32	618810	365942	252867	80	0	80	#N/A	0.004802	VACV			FALSE
20221007_MS_MRMhr_DC24_VACV_45C_r1.wiff	45C_r1	YSLPNAGDVI	10	C47H72N10O17	YSLPN[+1]AGDVI	YSLPN(unimod:7)AGDVI	YSLPN[Dea]AGDVI	YSLPN[Deamidated (NQ)]AGDVI	0.9121	0.9204	#N/A	32.02+/-0.1	#N/A	1048.51	2	525.261	#N/A	32	445408	287829	157579	0	0	0	#N/A	0.004648	VACV			FALSE
20221007_MS_MRMhr_DC24_VACV_45C_r2.wiff	45C_r2	YSLPNAGDVI	10	C47H72N10O17	YSLPN[+1]AGDVI	YSLPN(unimod:7)AGDVI	YSLPN[Dea]AGDVI	YSLPN[Deamidated (NQ)]AGDVI	0.8489	0.9136	#N/A	32.02+/-0.1	#N/A	1048.51	2	525.261	#N/A	32	414199	304194	110005	0	0	0	#N/A	0.004057	VACV			FALSE
20221007_MS_MRMhr_DC24_VACV_45C_r3.wiff	45C_r3	YSLPNAGDVI	10	C47H72N10O17	YSLPN[+1]AGDVI	YSLPN(unimod:7)AGDVI	YSLPN[Dea]AGDVI	YSLPN[Deamidated (NQ)]AGDVI	0.8159	0.9176	#N/A	32.02+/-0.1	#N/A	1048.51	2	525.261	#N/A	32	471886	303335	168552	0	0	0	#N/A	0.004278	VACV			FALSE
20221007_MS_MRMhr_DC24_VACV_49C_r1.wiff	49C_r1	YSLPNAGDVI	10	C47H72N10O17	YSLPN[+1]AGDVI	YSLPN(unimod:7)AGDVI	YSLPN[Dea]AGDVI	YSLPN[Deamidated (NQ)]AGDVI	0.8776	0.914	#N/A	32.02+/-0.1	#N/A	1048.51	2	525.261	#N/A	32	340860	229061	111800	0	0	0	#N/A	0.005659	VACV			FALSE
20221007_MS_MRMhr_DC24_VACV_49C_r2.wiff	49C_r2	YSLPNAGDVI	10	C47H72N10O17	YSLPN[+1]AGDVI	YSLPN(unimod:7)AGDVI	YSLPN[Dea]AGDVI	YSLPN[Deamidated (NQ)]AGDVI	0.8558	0.9118	#N/A	32.02+/-0.1	#N/A	1048.51	2	525.261	#N/A	32	419368	248596	170772	0	0	0	#N/A	0.005443	VACV			FALSE
20221007_MS_MRMhr_DC24_VACV_49C_r3.wiff	49C_r3	YSLPNAGDVI	10	C47H72N10O17	YSLPN[+1]AGDVI	YSLPN(unimod:7)AGDVI	YSLPN[Dea]AGDVI	YSLPN[Deamidated (NQ)]AGDVI	0.8356	0.9133	#N/A	32.02+/-0.1	#N/A	1048.51	2	525.261	#N/A	32	336591	219107	117484	0	0	0	#N/A	0.005445	VACV			FALSE
20221007_MS_MRMhr_DC24_VACV_53C_r1.wiff	53C_r1	YSLPNAGDVI	10	C47H72N10O17	YSLPN[+1]AGDVI	YSLPN(unimod:7)AGDVI	YSLPN[Dea]AGDVI	YSLPN[Deamidated (NQ)]AGDVI	0.8358	0.9167	#N/A	32.02+/-0.1	#N/A	1048.51	2	525.261	#N/A	32	237189	153745	83444	0	0	0	#N/A	0.003989	VACV			FALSE
20221007_MS_MRMhr_DC24_VACV_53C_r2.wiff	53C_r2	YSLPNAGDVI	10	C47H72N10O17	YSLPN[+1]AGDVI	YSLPN(unimod:7)AGDVI	YSLPN[Dea]AGDVI	YSLPN[Deamidated (NQ)]AGDVI	0.9008	0.9123	#N/A	32.02+/-0.1	#N/A	1048.51	2	525.261	#N/A	32	297919	203273	94645	0	0	0	#N/A	0.006958	VACV			FALSE
20221007_MS_MRMhr_DC24_VACV_53C_r3.wiff	53C_r3	YSLPNAGDVI	10	C47H72N10O17	YSLPN[+1]AGDVI	YSLPN(unimod:7)AGDVI	YSLPN[Dea]AGDVI	YSLPN[Deamidated (NQ)]AGDVI	0.8752	0.9173	#N/A	32.02+/-0.1	#N/A	1048.51	2	525.261	#N/A	32	303369	195109	108260	0	0	0	#N/A	0.005524	VACV			FALSE
20221007_MS_MRMhr_DC24_VACV_57C_r1.wiff	57C_r1	YSLPNAGDVI	10	C47H72N10O17	YSLPN[+1]AGDVI	YSLPN(unimod:7)AGDVI	YSLPN[Dea]AGDVI	YSLPN[Deamidated (NQ)]AGDVI	0.7084	0.9477	#N/A	32.02+/-0.1	#N/A	1048.51	2	525.261	#N/A	32	41427	29987	11440	0	0	0	#N/A	0.001253	VACV			FALSE
20221007_MS_MRMhr_DC24_VACV_57C_r2.wiff	57C_r2	YSLPNAGDVI	10	C47H72N10O17	YSLPN[+1]AGDVI	YSLPN(unimod:7)AGDVI	YSLPN[Dea]AGDVI	YSLPN[Deamidated (NQ)]AGDVI	0.8115	0.9162	#N/A	32.02+/-0.1	#N/A	1048.51	2	525.261	#N/A	32	48196	30330	17866	0	0	0	#N/A	0.001558	VACV			FALSE
20221007_MS_MRMhr_DC24_VACV_57C_r3.wiff	57C_r3	YSLPNAGDVI	10	C47H72N10O17	YSLPN[+1]AGDVI	YSLPN(unimod:7)AGDVI	YSLPN[Dea]AGDVI	YSLPN[Deamidated (NQ)]AGDVI	0.7465	0.8948	#N/A	32.02+/-0.1	#N/A	1048.51	2	525.261	#N/A	32	38398	26076	12322	555	555	0	#N/A	0.001455	VACV			FALSE
20221007_MS_MRMhr_DC24_VACV_61C_r1.wiff	61C_r1	YSLPNAGDVI	10	C47H72N10O17	YSLPN[+1]AGDVI	YSLPN(unimod:7)AGDVI	YSLPN[Dea]AGDVI	YSLPN[Deamidated (NQ)]AGDVI	0.3762	0.6565	#N/A	32.02+/-0.1	#N/A	1048.51	2	525.261	#N/A	32	5216	4038	1178	0	0	0	#N/A	0.000246	VACV			FALSE
20221007_MS_MRMhr_DC24_VACV_61C_r2.wiff	61C_r2	YSLPNAGDVI	10	C47H72N10O17	YSLPN[+1]AGDVI	YSLPN(unimod:7)AGDVI	YSLPN[Dea]AGDVI	YSLPN[Deamidated (NQ)]AGDVI	0	0.8249	#N/A	32.02+/-0.1	#N/A	1048.51	2	525.261	#N/A	32	4164	4164	0	0	0	0	#N/A	0.0002	VACV			FALSE
20221007_MS_MRMhr_DC24_VACV_61C_r3.wiff	61C_r3	YSLPNAGDVI	10	C47H72N10O17	YSLPN[+1]AGDVI	YSLPN(unimod:7)AGDVI	YSLPN[Dea]AGDVI	YSLPN[Deamidated (NQ)]AGDVI	0.48	0.7873	#N/A	32.02+/-0.1	#N/A	1048.51	2	525.261	#N/A	32	7378	5509	1869	0	0	0	#N/A	0.000317	VACV			FALSE
20221007_MS_MRMhr_DC24_VACV_65C_r1.wiff	65C_r1	YSLPNAGDVI	10	C47H72N10O17	YSLPN[+1]AGDVI	YSLPN(unimod:7)AGDVI	YSLPN[Dea]AGDVI	YSLPN[Deamidated (NQ)]AGDVI	0	0.6329	#N/A	32.02+/-0.1	#N/A	1048.51	2	525.261	#N/A	32	1642	1642	0	0	0	0	#N/A	âˆž	VACV			FALSE
20221007_MS_MRMhr_DC24_VACV_65C_r2.wiff	65C_r2	YSLPNAGDVI	10	C47H72N10O17	YSLPN[+1]AGDVI	YSLPN(unimod:7)AGDVI	YSLPN[Dea]AGDVI	YSLPN[Deamidated (NQ)]AGDVI	0	0.6527	#N/A	32.02+/-0.1	#N/A	1048.51	2	525.261	#N/A	32	481	481	0	228	228	0	#N/A	âˆž	VACV			FALSE
20221007_MS_MRMhr_DC24_VACV_69C_r1.wiff	69C_r1	YSLPNAGDVI	10	C47H72N10O17	YSLPN[+1]AGDVI	YSLPN(unimod:7)AGDVI	YSLPN[Dea]AGDVI	YSLPN[Deamidated (NQ)]AGDVI	0	0.4458	#N/A	32.02+/-0.1	#N/A	1048.51	2	525.261	#N/A	32	1890	1890	0	0	0	0	#N/A	âˆž	VACV			FALSE
20221007_MS_MRMhr_DC24_VACV_69C_r2.wiff	69C_r2	YSLPNAGDVI	10	C47H72N10O17	YSLPN[+1]AGDVI	YSLPN(unimod:7)AGDVI	YSLPN[Dea]AGDVI	YSLPN[Deamidated (NQ)]AGDVI	0	0.4511	#N/A	32.02+/-0.1	#N/A	1048.51	2	525.261	#N/A	32	2513	2513	0	0	0	0	#N/A	âˆž	VACV			FALSE
20221007_MS_MRMhr_DC24_VACV_69C_r3.wiff	69C_r3	YSLPNAGDVI	10	C47H72N10O17	YSLPN[+1]AGDVI	YSLPN(unimod:7)AGDVI	YSLPN[Dea]AGDVI	YSLPN[Deamidated (NQ)]AGDVI	0	0.5974	#N/A	32.02+/-0.1	#N/A	1048.51	2	525.261	#N/A	32	1963	1963	0	0	0	0	#N/A	âˆž	VACV			FALSE
20221007_MS_MRMhr_DC24_VACV_73C_r1.wiff	73C_r1	YSLPNAGDVI	10	C47H72N10O17	YSLPN[+1]AGDVI	YSLPN(unimod:7)AGDVI	YSLPN[Dea]AGDVI	YSLPN[Deamidated (NQ)]AGDVI	0	0.813	#N/A	32.02+/-0.1	#N/A	1048.51	2	525.261	#N/A	32	583	583	0	0	0	0	#N/A	âˆž	VACV			FALSE
20221007_MS_MRMhr_DC24_VACV_73C_r2.wiff	73C_r2	YSLPNAGDVI	10	C47H72N10O17	YSLPN[+1]AGDVI	YSLPN(unimod:7)AGDVI	YSLPN[Dea]AGDVI	YSLPN[Deamidated (NQ)]AGDVI	0	0.7304	#N/A	32.02+/-0.1	#N/A	1048.51	2	525.261	#N/A	32	6383	6383	0	0	0	0	#N/A	âˆž	VACV			FALSE
20221007_MS_MRMhr_DC24_VACV_73C_r3.wiff	73C_r3	YSLPNAGDVI	10	C47H72N10O17	YSLPN[+1]AGDVI	YSLPN(unimod:7)AGDVI	YSLPN[Dea]AGDVI	YSLPN[Deamidated (NQ)]AGDVI	0	0.4556	#N/A	32.02+/-0.1	#N/A	1048.51	2	525.261	#N/A	32	1642	1642	0	0	0	0	#N/A	âˆž	VACV			FALSE
20221010_MS_zenoSWATH_DC24_VACV_37C_r1.wiff	SWATH_r1	LNFRFENV	8	C48H71N13O13	LNFRFENV	LNFRFENV	LNFRFENV	LNFRFENV	0.9527	0.9959	#N/A	28.59+/-0.03	#N/A	1037.53	2	519.772	#N/A	28.64	3461833	1510283	1951550	6632	3289	3343	#N/A	0.025224	VACV			FALSE
20221010_MS_zenoSWATH_DC24_VACV_37C_r2.wiff	SWATH_r2	LNFRFENV	8	C48H71N13O13	LNFRFENV	LNFRFENV	LNFRFENV	LNFRFENV	0.9563	0.9963	#N/A	28.59+/-0.03	#N/A	1037.53	2	519.772	#N/A	28.64	2328316	997962	1330354	13585	12005	1580	#N/A	0.024124	VACV			FALSE
20221010_MS_zenoSWATH_DC24_VACV_37C_r3.wiff	SWATH_r3	LNFRFENV	8	C48H71N13O13	LNFRFENV	LNFRFENV	LNFRFENV	LNFRFENV	0.9561	0.998	#N/A	28.59+/-0.03	#N/A	1037.53	2	519.772	#N/A	28.64	2635708	1141017	1494691	2536	2536	0	#N/A	0.02309	VACV			FALSE
20221007_MS_MRMhr_DC24_VACV_37C_r1.wiff	37C_r1	LNFRFENV	8	C48H71N13O13	LNFRFENV	LNFRFENV	LNFRFENV	LNFRFENV	0.9471	0.9965	#N/A	28.59+/-0.03	#N/A	1037.53	2	519.772	#N/A	28.64	4224120	2330317	1893803	32831	27178	5653	#N/A	0.035661	VACV			FALSE
20221007_MS_MRMhr_DC24_VACV_37C_r2.wiff	37C_r2	LNFRFENV	8	C48H71N13O13	LNFRFENV	LNFRFENV	LNFRFENV	LNFRFENV	0.9711	0.9979	#N/A	28.59+/-0.03	#N/A	1037.53	2	519.772	#N/A	28.64	4027303	2225713	1801590	8149	8149	0	#N/A	0.033634	VACV			FALSE
20221007_MS_MRMhr_DC24_VACV_37C_r3.wiff	37C_r3	LNFRFENV	8	C48H71N13O13	LNFRFENV	LNFRFENV	LNFRFENV	LNFRFENV	0.9509	0.9961	#N/A	28.59+/-0.03	#N/A	1037.53	2	519.772	#N/A	28.64	3720711	2034999	1685712	5197	5197	0	#N/A	0.037305	VACV			FALSE
20221007_MS_MRMhr_DC24_VACV_41C_r1.wiff	41C_r1	LNFRFENV	8	C48H71N13O13	LNFRFENV	LNFRFENV	LNFRFENV	LNFRFENV	0.9553	0.9951	#N/A	28.59+/-0.03	#N/A	1037.53	2	519.772	#N/A	28.64	2027432	1115035	912398	6912	6912	0	#N/A	0.028571	VACV			FALSE
20221007_MS_MRMhr_DC24_VACV_41C_r2.wiff	41C_r2	LNFRFENV	8	C48H71N13O13	LNFRFENV	LNFRFENV	LNFRFENV	LNFRFENV	0.9483	0.9976	#N/A	28.59+/-0.03	#N/A	1037.53	2	519.772	#N/A	28.64	3640588	2019437	1621151	8994	8994	0	#N/A	0.032102	VACV			FALSE
20221007_MS_MRMhr_DC24_VACV_41C_r3.wiff	41C_r3	LNFRFENV	8	C48H71N13O13	LNFRFENV	LNFRFENV	LNFRFENV	LNFRFENV	0.95	0.998	#N/A	28.59+/-0.03	#N/A	1037.53	2	519.772	#N/A	28.64	4463475	2464672	1998803	12480	9943	2537	#N/A	0.034637	VACV			FALSE
20221007_MS_MRMhr_DC24_VACV_45C_r1.wiff	45C_r1	LNFRFENV	8	C48H71N13O13	LNFRFENV	LNFRFENV	LNFRFENV	LNFRFENV	0.9731	0.9983	#N/A	28.59+/-0.03	#N/A	1037.53	2	519.772	#N/A	28.64	2856307	1596161	1260146	5323	5323	0	#N/A	0.02981	VACV			FALSE
20221007_MS_MRMhr_DC24_VACV_45C_r2.wiff	45C_r2	LNFRFENV	8	C48H71N13O13	LNFRFENV	LNFRFENV	LNFRFENV	LNFRFENV	0.9752	0.9978	#N/A	28.59+/-0.03	#N/A	1037.53	2	519.772	#N/A	28.64	3226423	1794962	1431461	887	887	0	#N/A	0.031602	VACV			FALSE
20221007_MS_MRMhr_DC24_VACV_45C_r3.wiff	45C_r3	LNFRFENV	8	C48H71N13O13	LNFRFENV	LNFRFENV	LNFRFENV	LNFRFENV	0.9646	0.9978	#N/A	28.59+/-0.03	#N/A	1037.53	2	519.772	#N/A	28.64	3615798	1931482	1684316	5921	5921	0	#N/A	0.032778	VACV			FALSE
20221007_MS_MRMhr_DC24_VACV_49C_r1.wiff	49C_r1	LNFRFENV	8	C48H71N13O13	LNFRFENV	LNFRFENV	LNFRFENV	LNFRFENV	0.9592	0.9938	#N/A	28.59+/-0.03	#N/A	1037.53	2	519.772	#N/A	28.64	809385	423557	385828	3188	3188	0	#N/A	0.013437	VACV			FALSE
20221007_MS_MRMhr_DC24_VACV_49C_r2.wiff	49C_r2	LNFRFENV	8	C48H71N13O13	LNFRFENV	LNFRFENV	LNFRFENV	LNFRFENV	0.9653	0.9984	#N/A	28.59+/-0.03	#N/A	1037.53	2	519.772	#N/A	28.64	2127992	1181692	946300	655	655	0	#N/A	0.02762	VACV			FALSE
20221007_MS_MRMhr_DC24_VACV_49C_r3.wiff	49C_r3	LNFRFENV	8	C48H71N13O13	LNFRFENV	LNFRFENV	LNFRFENV	LNFRFENV	0.9643	0.9951	#N/A	28.59+/-0.03	#N/A	1037.53	2	519.772	#N/A	28.64	1656116	891938	764177	337	337	0	#N/A	0.026789	VACV			FALSE
20221007_MS_MRMhr_DC24_VACV_53C_r1.wiff	53C_r1	LNFRFENV	8	C48H71N13O13	LNFRFENV	LNFRFENV	LNFRFENV	LNFRFENV	0.9639	0.9993	#N/A	28.59+/-0.03	#N/A	1037.53	2	519.772	#N/A	28.64	1359314	719698	639616	218	218	0	#N/A	0.022862	VACV			FALSE
20221007_MS_MRMhr_DC24_VACV_53C_r2.wiff	53C_r2	LNFRFENV	8	C48H71N13O13	LNFRFENV	LNFRFENV	LNFRFENV	LNFRFENV	0.9598	0.9914	#N/A	28.59+/-0.03	#N/A	1037.53	2	519.772	#N/A	28.64	608608	309710	298898	1031	1031	0	#N/A	0.014214	VACV			FALSE
20221007_MS_MRMhr_DC24_VACV_53C_r3.wiff	53C_r3	LNFRFENV	8	C48H71N13O13	LNFRFENV	LNFRFENV	LNFRFENV	LNFRFENV	0.9698	0.999	#N/A	28.59+/-0.03	#N/A	1037.53	2	519.772	#N/A	28.64	1144227	605174	539054	236	236	0	#N/A	0.020833	VACV			FALSE
20221007_MS_MRMhr_DC24_VACV_57C_r1.wiff	57C_r1	LNFRFENV	8	C48H71N13O13	LNFRFENV	LNFRFENV	LNFRFENV	LNFRFENV	0.9443	0.9836	#N/A	28.59+/-0.03	#N/A	1037.53	2	519.772	#N/A	28.64	168259	93411	74848	1489	1489	0	#N/A	0.005089	VACV			FALSE
20221007_MS_MRMhr_DC24_VACV_57C_r2.wiff	57C_r2	LNFRFENV	8	C48H71N13O13	LNFRFENV	LNFRFENV	LNFRFENV	LNFRFENV	0.8661	0.9766	#N/A	28.59+/-0.03	#N/A	1037.53	2	519.772	#N/A	28.64	97780	59014	38766	1454	1454	0	#N/A	0.00316	VACV			FALSE
20221007_MS_MRMhr_DC24_VACV_57C_r3.wiff	57C_r3	LNFRFENV	8	C48H71N13O13	LNFRFENV	LNFRFENV	LNFRFENV	LNFRFENV	0.9439	0.9754	#N/A	28.59+/-0.03	#N/A	1037.53	2	519.772	#N/A	28.64	77940	47110	30829	1210	1210	0	#N/A	0.002953	VACV			FALSE
20221007_MS_MRMhr_DC24_VACV_61C_r1.wiff	61C_r1	LNFRFENV	8	C48H71N13O13	LNFRFENV	LNFRFENV	LNFRFENV	LNFRFENV	0.9305	0.9236	#N/A	28.59+/-0.03	#N/A	1037.53	2	519.772	#N/A	28.64	42062	29884	12178	4857	4857	0	#N/A	0.001983	VACV			FALSE
20221007_MS_MRMhr_DC24_VACV_61C_r2.wiff	61C_r2	LNFRFENV	8	C48H71N13O13	LNFRFENV	LNFRFENV	LNFRFENV	LNFRFENV	0.7898	0.9085	#N/A	28.59+/-0.03	#N/A	1037.53	2	519.772	#N/A	28.64	25464	19903	5562	2202	2202	0	#N/A	0.001221	VACV			FALSE
20221007_MS_MRMhr_DC24_VACV_61C_r3.wiff	61C_r3	LNFRFENV	8	C48H71N13O13	LNFRFENV	LNFRFENV	LNFRFENV	LNFRFENV	0.8464	0.9713	#N/A	28.59+/-0.03	#N/A	1037.53	2	519.772	#N/A	28.64	39979	26199	13779	9610	9610	0	#N/A	0.001716	VACV			FALSE
20221007_MS_MRMhr_DC24_VACV_65C_r1.wiff	65C_r1	LNFRFENV	8	C48H71N13O13	LNFRFENV	LNFRFENV	LNFRFENV	LNFRFENV	0.6172	0.8624	#N/A	28.59+/-0.03	#N/A	1037.53	2	519.772	#N/A	28.64	18548	15149	3399	4313	4313	0	#N/A	âˆž	VACV			FALSE
20221007_MS_MRMhr_DC24_VACV_65C_r2.wiff	65C_r2	LNFRFENV	8	C48H71N13O13	LNFRFENV	LNFRFENV	LNFRFENV	LNFRFENV	0.5828	0.8921	#N/A	28.59+/-0.03	#N/A	1037.53	2	519.772	#N/A	28.64	12819	10889	1930	0	0	0	#N/A	âˆž	VACV			FALSE
20221007_MS_MRMhr_DC24_VACV_69C_r1.wiff	69C_r1	LNFRFENV	8	C48H71N13O13	LNFRFENV	LNFRFENV	LNFRFENV	LNFRFENV	0.4447	0.8193	#N/A	28.59+/-0.03	#N/A	1037.53	2	519.772	#N/A	28.64	13245	11781	1464	3461	3461	0	#N/A	âˆž	VACV			FALSE
20221007_MS_MRMhr_DC24_VACV_69C_r2.wiff	69C_r2	LNFRFENV	8	C48H71N13O13	LNFRFENV	LNFRFENV	LNFRFENV	LNFRFENV	0.5003	0.8972	#N/A	28.59+/-0.03	#N/A	1037.53	2	519.772	#N/A	28.64	18343	15493	2850	1368	1368	0	#N/A	âˆž	VACV			FALSE
20221007_MS_MRMhr_DC24_VACV_69C_r3.wiff	69C_r3	LNFRFENV	8	C48H71N13O13	LNFRFENV	LNFRFENV	LNFRFENV	LNFRFENV	0.7351	0.9151	#N/A	28.59+/-0.03	#N/A	1037.53	2	519.772	#N/A	28.64	18533	14901	3632	1553	1553	0	#N/A	âˆž	VACV			FALSE
20221007_MS_MRMhr_DC24_VACV_73C_r1.wiff	73C_r1	LNFRFENV	8	C48H71N13O13	LNFRFENV	LNFRFENV	LNFRFENV	LNFRFENV	0.6478	0.8704	#N/A	28.59+/-0.03	#N/A	1037.53	2	519.772	#N/A	28.64	14026	12454	1573	4469	4469	0	#N/A	âˆž	VACV			FALSE
20221007_MS_MRMhr_DC24_VACV_73C_r2.wiff	73C_r2	LNFRFENV	8	C48H71N13O13	LNFRFENV	LNFRFENV	LNFRFENV	LNFRFENV	0.8924	0.8534	#N/A	28.59+/-0.03	#N/A	1037.53	2	519.772	#N/A	28.64	39124	30609	8515	779	779	0	#N/A	âˆž	VACV			FALSE
20221007_MS_MRMhr_DC24_VACV_73C_r3.wiff	73C_r3	LNFRFENV	8	C48H71N13O13	LNFRFENV	LNFRFENV	LNFRFENV	LNFRFENV	0.7389	0.9105	#N/A	28.59+/-0.03	#N/A	1037.53	2	519.772	#N/A	28.64	22390	18574	3816	6870	6870	0	#N/A	âˆž	VACV			FALSE
20221010_MS_zenoSWATH_DC24_VACV_37C_r1.wiff	SWATH_r1	SIFRFLNI	8	C49H76N12O11	SIFRFLNI	SIFRFLNI	SIFRFLNI	SIFRFLNI	0.9369	0.9809	#N/A	40.01+/-0.07	#N/A	1008.58	2	505.295	#N/A	40.03	1949690	595221	1354469	13488	13488	0	#N/A	0.014206	VACV			FALSE
20221010_MS_zenoSWATH_DC24_VACV_37C_r2.wiff	SWATH_r2	SIFRFLNI	8	C49H76N12O11	SIFRFLNI	SIFRFLNI	SIFRFLNI	SIFRFLNI	0.9162	0.9845	#N/A	40.01+/-0.07	#N/A	1008.58	2	505.295	#N/A	40.03	986694	287123	699571	496	496	0	#N/A	0.010223	VACV			FALSE
20221010_MS_zenoSWATH_DC24_VACV_37C_r3.wiff	SWATH_r3	SIFRFLNI	8	C49H76N12O11	SIFRFLNI	SIFRFLNI	SIFRFLNI	SIFRFLNI	0.9788	0.9935	#N/A	40.01+/-0.07	#N/A	1008.58	2	505.295	#N/A	40.03	754375	224348	530027	2575	2575	0	#N/A	0.006609	VACV			FALSE
20221007_MS_MRMhr_DC24_VACV_37C_r1.wiff	37C_r1	SIFRFLNI	8	C49H76N12O11	SIFRFLNI	SIFRFLNI	SIFRFLNI	SIFRFLNI	0.9735	0.9204	#N/A	40.01+/-0.07	#N/A	1008.58	2	505.295	#N/A	40.03	2479096	1005270	1473826	1225	1225	0	#N/A	0.020929	VACV			FALSE
20221007_MS_MRMhr_DC24_VACV_37C_r2.wiff	37C_r2	SIFRFLNI	8	C49H76N12O11	SIFRFLNI	SIFRFLNI	SIFRFLNI	SIFRFLNI	0.9678	0.9053	#N/A	40.01+/-0.07	#N/A	1008.58	2	505.295	#N/A	40.03	1575063	585521	989542	3703	3703	0	#N/A	0.013154	VACV			FALSE
20221007_MS_MRMhr_DC24_VACV_37C_r3.wiff	37C_r3	SIFRFLNI	8	C49H76N12O11	SIFRFLNI	SIFRFLNI	SIFRFLNI	SIFRFLNI	0.9697	0.9748	#N/A	40.01+/-0.07	#N/A	1008.58	2	505.295	#N/A	40.03	702025	260508	441517	5271	5271	0	#N/A	0.007039	VACV			FALSE
20221007_MS_MRMhr_DC24_VACV_41C_r1.wiff	41C_r1	SIFRFLNI	8	C49H76N12O11	SIFRFLNI	SIFRFLNI	SIFRFLNI	SIFRFLNI	0.8463	0.9808	#N/A	40.01+/-0.07	#N/A	1008.58	2	505.295	#N/A	40.03	77635	34459	43176	2580	2580	0	#N/A	0.001094	VACV			FALSE
20221007_MS_MRMhr_DC24_VACV_41C_r2.wiff	41C_r2	SIFRFLNI	8	C49H76N12O11	SIFRFLNI	SIFRFLNI	SIFRFLNI	SIFRFLNI	0.961	0.8931	#N/A	40.01+/-0.07	#N/A	1008.58	2	505.295	#N/A	40.03	655612	243505	412107	63	63	0	#N/A	0.005781	VACV			FALSE
20221007_MS_MRMhr_DC24_VACV_41C_r3.wiff	41C_r3	SIFRFLNI	8	C49H76N12O11	SIFRFLNI	SIFRFLNI	SIFRFLNI	SIFRFLNI	0.9666	0.9063	#N/A	40.01+/-0.07	#N/A	1008.58	2	505.295	#N/A	40.03	1607290	591928	1015361	2395	2395	0	#N/A	0.012473	VACV			FALSE
20221007_MS_MRMhr_DC24_VACV_45C_r1.wiff	45C_r1	SIFRFLNI	8	C49H76N12O11	SIFRFLNI	SIFRFLNI	SIFRFLNI	SIFRFLNI	0.9838	0.8877	#N/A	40.01+/-0.07	#N/A	1008.58	2	505.295	#N/A	40.03	2352121	948120	1404002	5914	5914	0	#N/A	0.024548	VACV			FALSE
20221007_MS_MRMhr_DC24_VACV_45C_r2.wiff	45C_r2	SIFRFLNI	8	C49H76N12O11	SIFRFLNI	SIFRFLNI	SIFRFLNI	SIFRFLNI	0.9707	0.9041	#N/A	40.01+/-0.07	#N/A	1008.58	2	505.295	#N/A	40.03	1704975	665072	1039903	8657	8657	0	#N/A	0.0167	VACV			FALSE
20221007_MS_MRMhr_DC24_VACV_45C_r3.wiff	45C_r3	SIFRFLNI	8	C49H76N12O11	SIFRFLNI	SIFRFLNI	SIFRFLNI	SIFRFLNI	0.9849	0.8957	#N/A	40.01+/-0.07	#N/A	1008.58	2	505.295	#N/A	40.03	2056161	810728	1245433	4953	4953	0	#N/A	0.018639	VACV			FALSE
20221007_MS_MRMhr_DC24_VACV_49C_r1.wiff	49C_r1	SIFRFLNI	8	C49H76N12O11	SIFRFLNI	SIFRFLNI	SIFRFLNI	SIFRFLNI	0.9677	0.8986	#N/A	40.01+/-0.07	#N/A	1008.58	2	505.295	#N/A	40.03	1737385	697850	1039535	8383	8383	0	#N/A	0.028842	VACV			FALSE
20221007_MS_MRMhr_DC24_VACV_49C_r2.wiff	49C_r2	SIFRFLNI	8	C49H76N12O11	SIFRFLNI	SIFRFLNI	SIFRFLNI	SIFRFLNI	0.9806	0.9001	#N/A	40.01+/-0.07	#N/A	1008.58	2	505.295	#N/A	40.03	696532	264750	431783	5593	5593	0	#N/A	0.009041	VACV			FALSE
20221007_MS_MRMhr_DC24_VACV_49C_r3.wiff	49C_r3	SIFRFLNI	8	C49H76N12O11	SIFRFLNI	SIFRFLNI	SIFRFLNI	SIFRFLNI	0.9001	0.9546	#N/A	40.01+/-0.07	#N/A	1008.58	2	505.295	#N/A	40.03	121656	50406	71251	385	385	0	#N/A	0.001968	VACV			FALSE
20221007_MS_MRMhr_DC24_VACV_53C_r1.wiff	53C_r1	SIFRFLNI	8	C49H76N12O11	SIFRFLNI	SIFRFLNI	SIFRFLNI	SIFRFLNI	0.9782	0.966	#N/A	40.01+/-0.07	#N/A	1008.58	2	505.295	#N/A	40.03	2040836	826066	1214770	4512	4512	0	#N/A	0.034325	VACV			FALSE
20221007_MS_MRMhr_DC24_VACV_53C_r2.wiff	53C_r2	SIFRFLNI	8	C49H76N12O11	SIFRFLNI	SIFRFLNI	SIFRFLNI	SIFRFLNI	0.4789	0.8352	#N/A	40.01+/-0.07	#N/A	1008.58	2	505.295	#N/A	40.03	7176	6114	1061	3705	3705	0	#N/A	0.000168	VACV			FALSE
20221007_MS_MRMhr_DC24_VACV_53C_r3.wiff	53C_r3	SIFRFLNI	8	C49H76N12O11	SIFRFLNI	SIFRFLNI	SIFRFLNI	SIFRFLNI	0.9282	0.977	#N/A	40.01+/-0.07	#N/A	1008.58	2	505.295	#N/A	40.03	252850	100331	152519	812	812	0	#N/A	0.004604	VACV			FALSE
20221007_MS_MRMhr_DC24_VACV_57C_r1.wiff	57C_r1	SIFRFLNI	8	C49H76N12O11	SIFRFLNI	SIFRFLNI	SIFRFLNI	SIFRFLNI	0.9682	0.8471	#N/A	40.01+/-0.07	#N/A	1008.58	2	505.295	#N/A	40.03	689869	309929	379940	6661	6661	0	#N/A	0.020867	VACV			FALSE
20221007_MS_MRMhr_DC24_VACV_57C_r2.wiff	57C_r2	SIFRFLNI	8	C49H76N12O11	SIFRFLNI	SIFRFLNI	SIFRFLNI	SIFRFLNI	0.9246	0.8	#N/A	40.01+/-0.07	#N/A	1008.58	2	505.295	#N/A	40.03	346345	178735	167610	3053	3053	0	#N/A	0.011193	VACV			FALSE
20221007_MS_MRMhr_DC24_VACV_57C_r3.wiff	57C_r3	SIFRFLNI	8	C49H76N12O11	SIFRFLNI	SIFRFLNI	SIFRFLNI	SIFRFLNI	0.9479	0.723	#N/A	40.01+/-0.07	#N/A	1008.58	2	505.295	#N/A	40.03	263182	154571	108611	2360	2360	0	#N/A	0.00997	VACV			FALSE
20221007_MS_MRMhr_DC24_VACV_61C_r1.wiff	61C_r1	SIFRFLNI	8	C49H76N12O11	SIFRFLNI	SIFRFLNI	SIFRFLNI	SIFRFLNI	0.8502	0.5672	#N/A	40.01+/-0.07	#N/A	1008.58	2	505.295	#N/A	40.03	124911	96318	28594	2555	2555	0	#N/A	0.005888	VACV			FALSE
20221007_MS_MRMhr_DC24_VACV_61C_r2.wiff	61C_r2	SIFRFLNI	8	C49H76N12O11	SIFRFLNI	SIFRFLNI	SIFRFLNI	SIFRFLNI	0.7757	0.5939	#N/A	40.01+/-0.07	#N/A	1008.58	2	505.295	#N/A	40.03	75732	63051	12682	5197	5197	0	#N/A	0.003631	VACV			FALSE
20221007_MS_MRMhr_DC24_VACV_61C_r3.wiff	61C_r3	SIFRFLNI	8	C49H76N12O11	SIFRFLNI	SIFRFLNI	SIFRFLNI	SIFRFLNI	0.7754	0.576	#N/A	40.01+/-0.07	#N/A	1008.58	2	505.295	#N/A	40.03	88932	70100	18832	0	0	0	#N/A	0.003816	VACV			FALSE
20221007_MS_MRMhr_DC24_VACV_65C_r1.wiff	65C_r1	SIFRFLNI	8	C49H76N12O11	SIFRFLNI	SIFRFLNI	SIFRFLNI	SIFRFLNI	0.6259	0.4325	#N/A	40.01+/-0.07	#N/A	1008.58	2	505.295	#N/A	40.03	130963	127509	3454	5859	5859	0	#N/A	âˆž	VACV			FALSE
20221007_MS_MRMhr_DC24_VACV_65C_r2.wiff	65C_r2	SIFRFLNI	8	C49H76N12O11	SIFRFLNI	SIFRFLNI	SIFRFLNI	SIFRFLNI	0.4789	0.454	#N/A	40.01+/-0.07	#N/A	1008.58	2	505.295	#N/A	40.03	41828	41698	130	3718	3718	0	#N/A	âˆž	VACV			FALSE
20221007_MS_MRMhr_DC24_VACV_69C_r1.wiff	69C_r1	SIFRFLNI	8	C49H76N12O11	SIFRFLNI	SIFRFLNI	SIFRFLNI	SIFRFLNI	0.7528	0.6418	#N/A	40.01+/-0.07	#N/A	1008.58	2	505.295	#N/A	40.03	44884	40029	4855	5592	5592	0	#N/A	âˆž	VACV			FALSE
20221007_MS_MRMhr_DC24_VACV_69C_r2.wiff	69C_r2	SIFRFLNI	8	C49H76N12O11	SIFRFLNI	SIFRFLNI	SIFRFLNI	SIFRFLNI	0.7819	0.6585	#N/A	40.01+/-0.07	#N/A	1008.58	2	505.295	#N/A	40.03	61369	45539	15830	434	434	0	#N/A	âˆž	VACV			FALSE
20221007_MS_MRMhr_DC24_VACV_69C_r3.wiff	69C_r3	SIFRFLNI	8	C49H76N12O11	SIFRFLNI	SIFRFLNI	SIFRFLNI	SIFRFLNI	0.7899	0.5842	#N/A	40.01+/-0.07	#N/A	1008.58	2	505.295	#N/A	40.03	60207	46691	13516	4079	4079	0	#N/A	âˆž	VACV			FALSE
20221007_MS_MRMhr_DC24_VACV_73C_r1.wiff	73C_r1	SIFRFLNI	8	C49H76N12O11	SIFRFLNI	SIFRFLNI	SIFRFLNI	SIFRFLNI	0.8267	0.6413	#N/A	40.01+/-0.07	#N/A	1008.58	2	505.295	#N/A	40.03	81565	64161	17404	2286	2286	0	#N/A	âˆž	VACV			FALSE
20221007_MS_MRMhr_DC24_VACV_73C_r2.wiff	73C_r2	SIFRFLNI	8	C49H76N12O11	SIFRFLNI	SIFRFLNI	SIFRFLNI	SIFRFLNI	0.8128	0.7719	#N/A	40.01+/-0.07	#N/A	1008.58	2	505.295	#N/A	40.03	120727	77451	43276	6672	6672	0	#N/A	âˆž	VACV			FALSE
20221007_MS_MRMhr_DC24_VACV_73C_r3.wiff	73C_r3	SIFRFLNI	8	C49H76N12O11	SIFRFLNI	SIFRFLNI	SIFRFLNI	SIFRFLNI	0.8785	0.7437	#N/A	40.01+/-0.07	#N/A	1008.58	2	505.295	#N/A	40.03	102675	70410	32266	3851	3851	0	#N/A	âˆž	VACV			FALSE
20221010_MS_zenoSWATH_DC24_VACV_37C_r1.wiff	SWATH_r1	IGMFNLTFI	9	C51H78N10O13S	IGM[+16]FNLTFI	IGM(unimod:35)FNLTFI	IGM[Oxi]FNLTFI	IGM[Oxidation (M)]FNLTFI	0.9607	0.9984	#N/A	43.44+/-0.07	#N/A	1070.55	2	536.281	#N/A	43.47	2013023	959362	1053662	3763	3763	0	#N/A	0.014668	VACV			FALSE
20221010_MS_zenoSWATH_DC24_VACV_37C_r2.wiff	SWATH_r2	IGMFNLTFI	9	C51H78N10O13S	IGM[+16]FNLTFI	IGM(unimod:35)FNLTFI	IGM[Oxi]FNLTFI	IGM[Oxidation (M)]FNLTFI	0.9704	0.9983	#N/A	43.44+/-0.07	#N/A	1070.55	2	536.281	#N/A	43.47	768431	366401	402030	4158	4158	0	#N/A	0.007962	VACV			FALSE
20221010_MS_zenoSWATH_DC24_VACV_37C_r3.wiff	SWATH_r3	IGMFNLTFI	9	C51H78N10O13S	IGM[+16]FNLTFI	IGM(unimod:35)FNLTFI	IGM[Oxi]FNLTFI	IGM[Oxidation (M)]FNLTFI	0.9579	0.9948	#N/A	43.44+/-0.07	#N/A	1070.55	2	536.281	#N/A	43.47	1992785	946606	1046179	4543	4543	0	#N/A	0.017458	VACV			FALSE
20221007_MS_MRMhr_DC24_VACV_37C_r1.wiff	37C_r1	IGMFNLTFI	9	C51H78N10O13S	IGM[+16]FNLTFI	IGM(unimod:35)FNLTFI	IGM[Oxi]FNLTFI	IGM[Oxidation (M)]FNLTFI	0	0.999	#N/A	43.44+/-0.07	#N/A	1070.55	2	536.281	#N/A	43.47	1652031	1652031	#N/A	16617	16617	#N/A	#N/A	0.013947	VACV			FALSE
20221007_MS_MRMhr_DC24_VACV_37C_r2.wiff	37C_r2	IGMFNLTFI	9	C51H78N10O13S	IGM[+16]FNLTFI	IGM(unimod:35)FNLTFI	IGM[Oxi]FNLTFI	IGM[Oxidation (M)]FNLTFI	0	0.9972	#N/A	43.44+/-0.07	#N/A	1070.55	2	536.281	#N/A	43.47	804855	804855	#N/A	3642	3642	#N/A	#N/A	0.006722	VACV			FALSE
20221007_MS_MRMhr_DC24_VACV_37C_r3.wiff	37C_r3	IGMFNLTFI	9	C51H78N10O13S	IGM[+16]FNLTFI	IGM(unimod:35)FNLTFI	IGM[Oxi]FNLTFI	IGM[Oxidation (M)]FNLTFI	0	0.9986	#N/A	43.44+/-0.07	#N/A	1070.55	2	536.281	#N/A	43.47	1596277	1596277	#N/A	5115	5115	#N/A	#N/A	0.016005	VACV			FALSE
20221007_MS_MRMhr_DC24_VACV_41C_r1.wiff	41C_r1	IGMFNLTFI	9	C51H78N10O13S	IGM[+16]FNLTFI	IGM(unimod:35)FNLTFI	IGM[Oxi]FNLTFI	IGM[Oxidation (M)]FNLTFI	0	0.9958	#N/A	43.44+/-0.07	#N/A	1070.55	2	536.281	#N/A	43.47	400398	400398	#N/A	1284	1284	#N/A	#N/A	0.005643	VACV			FALSE
20221007_MS_MRMhr_DC24_VACV_41C_r2.wiff	41C_r2	IGMFNLTFI	9	C51H78N10O13S	IGM[+16]FNLTFI	IGM(unimod:35)FNLTFI	IGM[Oxi]FNLTFI	IGM[Oxidation (M)]FNLTFI	0	0.9992	#N/A	43.44+/-0.07	#N/A	1070.55	2	536.281	#N/A	43.47	1137688	1137688	#N/A	8505	8505	#N/A	#N/A	0.010032	VACV			FALSE
20221007_MS_MRMhr_DC24_VACV_41C_r3.wiff	41C_r3	IGMFNLTFI	9	C51H78N10O13S	IGM[+16]FNLTFI	IGM(unimod:35)FNLTFI	IGM[Oxi]FNLTFI	IGM[Oxidation (M)]FNLTFI	0	0.9991	#N/A	43.44+/-0.07	#N/A	1070.55	2	536.281	#N/A	43.47	1426317	1426317	#N/A	0	0	#N/A	#N/A	0.011068	VACV			FALSE
20221007_MS_MRMhr_DC24_VACV_45C_r1.wiff	45C_r1	IGMFNLTFI	9	C51H78N10O13S	IGM[+16]FNLTFI	IGM(unimod:35)FNLTFI	IGM[Oxi]FNLTFI	IGM[Oxidation (M)]FNLTFI	0	0.9983	#N/A	43.44+/-0.07	#N/A	1070.55	2	536.281	#N/A	43.47	1373548	1373548	#N/A	8783	8783	#N/A	#N/A	0.014335	VACV			FALSE
20221007_MS_MRMhr_DC24_VACV_45C_r2.wiff	45C_r2	IGMFNLTFI	9	C51H78N10O13S	IGM[+16]FNLTFI	IGM(unimod:35)FNLTFI	IGM[Oxi]FNLTFI	IGM[Oxidation (M)]FNLTFI	0	0.9981	#N/A	43.44+/-0.07	#N/A	1070.55	2	536.281	#N/A	43.47	1148205	1148205	#N/A	2881	2881	#N/A	#N/A	0.011247	VACV			FALSE
20221007_MS_MRMhr_DC24_VACV_45C_r3.wiff	45C_r3	IGMFNLTFI	9	C51H78N10O13S	IGM[+16]FNLTFI	IGM(unimod:35)FNLTFI	IGM[Oxi]FNLTFI	IGM[Oxidation (M)]FNLTFI	0	0.998	#N/A	43.44+/-0.07	#N/A	1070.55	2	536.281	#N/A	43.47	1416739	1416739	#N/A	0	0	#N/A	#N/A	0.012843	VACV			FALSE
20221007_MS_MRMhr_DC24_VACV_49C_r1.wiff	49C_r1	IGMFNLTFI	9	C51H78N10O13S	IGM[+16]FNLTFI	IGM(unimod:35)FNLTFI	IGM[Oxi]FNLTFI	IGM[Oxidation (M)]FNLTFI	0	0.9947	#N/A	43.44+/-0.07	#N/A	1070.55	2	536.281	#N/A	43.47	718563	718563	#N/A	5634	5634	#N/A	#N/A	0.011929	VACV			FALSE
20221007_MS_MRMhr_DC24_VACV_49C_r2.wiff	49C_r2	IGMFNLTFI	9	C51H78N10O13S	IGM[+16]FNLTFI	IGM(unimod:35)FNLTFI	IGM[Oxi]FNLTFI	IGM[Oxidation (M)]FNLTFI	0	0.9984	#N/A	43.44+/-0.07	#N/A	1070.55	2	536.281	#N/A	43.47	1128467	1128467	#N/A	0	0	#N/A	#N/A	0.014647	VACV			FALSE
20221007_MS_MRMhr_DC24_VACV_49C_r3.wiff	49C_r3	IGMFNLTFI	9	C51H78N10O13S	IGM[+16]FNLTFI	IGM(unimod:35)FNLTFI	IGM[Oxi]FNLTFI	IGM[Oxidation (M)]FNLTFI	0	0.9995	#N/A	43.44+/-0.07	#N/A	1070.55	2	536.281	#N/A	43.47	821138	821138	#N/A	2741	2741	#N/A	#N/A	0.013282	VACV			FALSE
20221007_MS_MRMhr_DC24_VACV_53C_r1.wiff	53C_r1	IGMFNLTFI	9	C51H78N10O13S	IGM[+16]FNLTFI	IGM(unimod:35)FNLTFI	IGM[Oxi]FNLTFI	IGM[Oxidation (M)]FNLTFI	0	0.9974	#N/A	43.44+/-0.07	#N/A	1070.55	2	536.281	#N/A	43.47	559546	559546	#N/A	5680	5680	#N/A	#N/A	0.009411	VACV			FALSE
20221007_MS_MRMhr_DC24_VACV_53C_r2.wiff	53C_r2	IGMFNLTFI	9	C51H78N10O13S	IGM[+16]FNLTFI	IGM(unimod:35)FNLTFI	IGM[Oxi]FNLTFI	IGM[Oxidation (M)]FNLTFI	0	0.9895	#N/A	43.44+/-0.07	#N/A	1070.55	2	536.281	#N/A	43.47	319074	319074	#N/A	1530	1530	#N/A	#N/A	0.007452	VACV			FALSE
20221007_MS_MRMhr_DC24_VACV_53C_r3.wiff	53C_r3	IGMFNLTFI	9	C51H78N10O13S	IGM[+16]FNLTFI	IGM(unimod:35)FNLTFI	IGM[Oxi]FNLTFI	IGM[Oxidation (M)]FNLTFI	0	0.9964	#N/A	43.44+/-0.07	#N/A	1070.55	2	536.281	#N/A	43.47	631756	631756	#N/A	3556	3556	#N/A	#N/A	0.011503	VACV			FALSE
20221007_MS_MRMhr_DC24_VACV_57C_r1.wiff	57C_r1	IGMFNLTFI	9	C51H78N10O13S	IGM[+16]FNLTFI	IGM(unimod:35)FNLTFI	IGM[Oxi]FNLTFI	IGM[Oxidation (M)]FNLTFI	0	0.9754	#N/A	43.44+/-0.07	#N/A	1070.55	2	536.281	#N/A	43.47	29197	29197	#N/A	3833	3833	#N/A	#N/A	0.000883	VACV			FALSE
20221007_MS_MRMhr_DC24_VACV_57C_r2.wiff	57C_r2	IGMFNLTFI	9	C51H78N10O13S	IGM[+16]FNLTFI	IGM(unimod:35)FNLTFI	IGM[Oxi]FNLTFI	IGM[Oxidation (M)]FNLTFI	0	0.8896	#N/A	43.44+/-0.07	#N/A	1070.55	2	536.281	#N/A	43.47	24093	24093	#N/A	1474	1474	#N/A	#N/A	0.000779	VACV			FALSE
20221007_MS_MRMhr_DC24_VACV_57C_r3.wiff	57C_r3	IGMFNLTFI	9	C51H78N10O13S	IGM[+16]FNLTFI	IGM(unimod:35)FNLTFI	IGM[Oxi]FNLTFI	IGM[Oxidation (M)]FNLTFI	0	0.9716	#N/A	43.44+/-0.07	#N/A	1070.55	2	536.281	#N/A	43.47	22850	22850	#N/A	2682	2682	#N/A	#N/A	0.000866	VACV			FALSE
20221007_MS_MRMhr_DC24_VACV_61C_r1.wiff	61C_r1	IGMFNLTFI	9	C51H78N10O13S	IGM[+16]FNLTFI	IGM(unimod:35)FNLTFI	IGM[Oxi]FNLTFI	IGM[Oxidation (M)]FNLTFI	0	0.846	#N/A	43.44+/-0.07	#N/A	1070.55	2	536.281	#N/A	43.47	13296	13296	#N/A	3450	3450	#N/A	#N/A	0.000627	VACV			FALSE
20221007_MS_MRMhr_DC24_VACV_61C_r2.wiff	61C_r2	IGMFNLTFI	9	C51H78N10O13S	IGM[+16]FNLTFI	IGM(unimod:35)FNLTFI	IGM[Oxi]FNLTFI	IGM[Oxidation (M)]FNLTFI	0	0.9741	#N/A	43.44+/-0.07	#N/A	1070.55	2	536.281	#N/A	43.47	8530	8530	#N/A	2746	2746	#N/A	#N/A	0.000409	VACV			FALSE
20221007_MS_MRMhr_DC24_VACV_61C_r3.wiff	61C_r3	IGMFNLTFI	9	C51H78N10O13S	IGM[+16]FNLTFI	IGM(unimod:35)FNLTFI	IGM[Oxi]FNLTFI	IGM[Oxidation (M)]FNLTFI	0	0.8651	#N/A	43.44+/-0.07	#N/A	1070.55	2	536.281	#N/A	43.47	11508	11508	#N/A	1402	1402	#N/A	#N/A	0.000494	VACV			FALSE
20221007_MS_MRMhr_DC24_VACV_65C_r1.wiff	65C_r1	IGMFNLTFI	9	C51H78N10O13S	IGM[+16]FNLTFI	IGM(unimod:35)FNLTFI	IGM[Oxi]FNLTFI	IGM[Oxidation (M)]FNLTFI	0	0.8756	#N/A	43.44+/-0.07	#N/A	1070.55	2	536.281	#N/A	43.47	8125	8125	#N/A	2063	2063	#N/A	#N/A	âˆž	VACV			FALSE
20221007_MS_MRMhr_DC24_VACV_65C_r2.wiff	65C_r2	IGMFNLTFI	9	C51H78N10O13S	IGM[+16]FNLTFI	IGM(unimod:35)FNLTFI	IGM[Oxi]FNLTFI	IGM[Oxidation (M)]FNLTFI	0	0.8948	#N/A	43.44+/-0.07	#N/A	1070.55	2	536.281	#N/A	43.47	6157	6157	#N/A	0	0	#N/A	#N/A	âˆž	VACV			FALSE
20221007_MS_MRMhr_DC24_VACV_69C_r1.wiff	69C_r1	IGMFNLTFI	9	C51H78N10O13S	IGM[+16]FNLTFI	IGM(unimod:35)FNLTFI	IGM[Oxi]FNLTFI	IGM[Oxidation (M)]FNLTFI	0	0.9218	#N/A	43.44+/-0.07	#N/A	1070.55	2	536.281	#N/A	43.47	10818	10818	#N/A	0	0	#N/A	#N/A	âˆž	VACV			FALSE
20221007_MS_MRMhr_DC24_VACV_69C_r2.wiff	69C_r2	IGMFNLTFI	9	C51H78N10O13S	IGM[+16]FNLTFI	IGM(unimod:35)FNLTFI	IGM[Oxi]FNLTFI	IGM[Oxidation (M)]FNLTFI	0	0.9452	#N/A	43.44+/-0.07	#N/A	1070.55	2	536.281	#N/A	43.47	9857	9857	#N/A	0	0	#N/A	#N/A	âˆž	VACV			FALSE
20221007_MS_MRMhr_DC24_VACV_69C_r3.wiff	69C_r3	IGMFNLTFI	9	C51H78N10O13S	IGM[+16]FNLTFI	IGM(unimod:35)FNLTFI	IGM[Oxi]FNLTFI	IGM[Oxidation (M)]FNLTFI	0	0.9289	#N/A	43.44+/-0.07	#N/A	1070.55	2	536.281	#N/A	43.47	11760	11760	#N/A	0	0	#N/A	#N/A	âˆž	VACV			FALSE
20221007_MS_MRMhr_DC24_VACV_73C_r1.wiff	73C_r1	IGMFNLTFI	9	C51H78N10O13S	IGM[+16]FNLTFI	IGM(unimod:35)FNLTFI	IGM[Oxi]FNLTFI	IGM[Oxidation (M)]FNLTFI	0	0.8658	#N/A	43.44+/-0.07	#N/A	1070.55	2	536.281	#N/A	43.47	8257	8257	#N/A	2736	2736	#N/A	#N/A	âˆž	VACV			FALSE
20221007_MS_MRMhr_DC24_VACV_73C_r2.wiff	73C_r2	IGMFNLTFI	9	C51H78N10O13S	IGM[+16]FNLTFI	IGM(unimod:35)FNLTFI	IGM[Oxi]FNLTFI	IGM[Oxidation (M)]FNLTFI	0	0.8472	#N/A	43.44+/-0.07	#N/A	1070.55	2	536.281	#N/A	43.47	17425	17425	#N/A	0	0	#N/A	#N/A	âˆž	VACV			FALSE
20221007_MS_MRMhr_DC24_VACV_73C_r3.wiff	73C_r3	IGMFNLTFI	9	C51H78N10O13S	IGM[+16]FNLTFI	IGM(unimod:35)FNLTFI	IGM[Oxi]FNLTFI	IGM[Oxidation (M)]FNLTFI	0	0.8665	#N/A	43.44+/-0.07	#N/A	1070.55	2	536.281	#N/A	43.47	13243	13243	#N/A	0	0	#N/A	#N/A	âˆž	VACV			FALSE
20221010_MS_zenoSWATH_DC24_VACV_37C_r1.wiff	SWATH_r1	VIYIFTVRL	9	C56H90N12O12	VIYIFTVRL	VIYIFTVRL	VIYIFTVRL	VIYIFTVRL	0.9599	0.9943	#N/A	40.9+/-0.05	#N/A	1122.68	2	562.347	#N/A	40.95	796766	182873	613893	0	0	0	#N/A	0.005806	VACV			FALSE
20221010_MS_zenoSWATH_DC24_VACV_37C_r2.wiff	SWATH_r2	VIYIFTVRL	9	C56H90N12O12	VIYIFTVRL	VIYIFTVRL	VIYIFTVRL	VIYIFTVRL	0.9484	0.9928	#N/A	40.9+/-0.05	#N/A	1122.68	2	562.347	#N/A	40.95	634238	150463	483775	1606	1606	0	#N/A	0.006572	VACV			FALSE
20221010_MS_zenoSWATH_DC24_VACV_37C_r3.wiff	SWATH_r3	VIYIFTVRL	9	C56H90N12O12	VIYIFTVRL	VIYIFTVRL	VIYIFTVRL	VIYIFTVRL	0.9627	0.9792	#N/A	40.9+/-0.05	#N/A	1122.68	2	562.347	#N/A	40.95	220809	47849	172960	5	5	0	#N/A	0.001934	VACV			FALSE
20221007_MS_MRMhr_DC24_VACV_37C_r1.wiff	37C_r1	VIYIFTVRL	9	C56H90N12O12	VIYIFTVRL	VIYIFTVRL	VIYIFTVRL	VIYIFTVRL	0.9794	0.999	#N/A	40.9+/-0.05	#N/A	1122.68	2	562.347	#N/A	40.95	1285515	463894	821621	2307	2307	0	#N/A	0.010853	VACV			FALSE
20221007_MS_MRMhr_DC24_VACV_37C_r2.wiff	37C_r2	VIYIFTVRL	9	C56H90N12O12	VIYIFTVRL	VIYIFTVRL	VIYIFTVRL	VIYIFTVRL	0.9682	0.9983	#N/A	40.9+/-0.05	#N/A	1122.68	2	562.347	#N/A	40.95	1066036	370322	695714	344	344	0	#N/A	0.008903	VACV			FALSE
20221007_MS_MRMhr_DC24_VACV_37C_r3.wiff	37C_r3	VIYIFTVRL	9	C56H90N12O12	VIYIFTVRL	VIYIFTVRL	VIYIFTVRL	VIYIFTVRL	0.9362	0.9919	#N/A	40.9+/-0.05	#N/A	1122.68	2	562.347	#N/A	40.95	272961	87885	185076	736	736	0	#N/A	0.002737	VACV			FALSE
20221007_MS_MRMhr_DC24_VACV_41C_r1.wiff	41C_r1	VIYIFTVRL	9	C56H90N12O12	VIYIFTVRL	VIYIFTVRL	VIYIFTVRL	VIYIFTVRL	0.9426	0.9867	#N/A	40.9+/-0.05	#N/A	1122.68	2	562.347	#N/A	40.95	115652	48047	67605	0	0	0	#N/A	0.00163	VACV			FALSE
20221007_MS_MRMhr_DC24_VACV_41C_r2.wiff	41C_r2	VIYIFTVRL	9	C56H90N12O12	VIYIFTVRL	VIYIFTVRL	VIYIFTVRL	VIYIFTVRL	0.9667	0.9988	#N/A	40.9+/-0.05	#N/A	1122.68	2	562.347	#N/A	40.95	524800	186115	338685	2022	2022	0	#N/A	0.004628	VACV			FALSE
20221007_MS_MRMhr_DC24_VACV_41C_r3.wiff	41C_r3	VIYIFTVRL	9	C56H90N12O12	VIYIFTVRL	VIYIFTVRL	VIYIFTVRL	VIYIFTVRL	0.9662	0.9927	#N/A	40.9+/-0.05	#N/A	1122.68	2	562.347	#N/A	40.95	713953	232029	481923	1333	1333	0	#N/A	0.00554	VACV			FALSE
20221007_MS_MRMhr_DC24_VACV_45C_r1.wiff	45C_r1	VIYIFTVRL	9	C56H90N12O12	VIYIFTVRL	VIYIFTVRL	VIYIFTVRL	VIYIFTVRL	0.9665	0.9949	#N/A	40.9+/-0.05	#N/A	1122.68	2	562.347	#N/A	40.95	1730950	607365	1123585	3042	3042	0	#N/A	0.018065	VACV			FALSE
20221007_MS_MRMhr_DC24_VACV_45C_r2.wiff	45C_r2	VIYIFTVRL	9	C56H90N12O12	VIYIFTVRL	VIYIFTVRL	VIYIFTVRL	VIYIFTVRL	0.9655	0.9958	#N/A	40.9+/-0.05	#N/A	1122.68	2	562.347	#N/A	40.95	1108331	374361	733970	2437	2437	0	#N/A	0.010856	VACV			FALSE
20221007_MS_MRMhr_DC24_VACV_45C_r3.wiff	45C_r3	VIYIFTVRL	9	C56H90N12O12	VIYIFTVRL	VIYIFTVRL	VIYIFTVRL	VIYIFTVRL	0.9679	0.9971	#N/A	40.9+/-0.05	#N/A	1122.68	2	562.347	#N/A	40.95	1638134	521672	1116463	3016	3016	0	#N/A	0.01485	VACV			FALSE
20221007_MS_MRMhr_DC24_VACV_49C_r1.wiff	49C_r1	VIYIFTVRL	9	C56H90N12O12	VIYIFTVRL	VIYIFTVRL	VIYIFTVRL	VIYIFTVRL	0.967	0.9982	#N/A	40.9+/-0.05	#N/A	1122.68	2	562.347	#N/A	40.95	1661294	573796	1087497	4447	4447	0	#N/A	0.027579	VACV			FALSE
20221007_MS_MRMhr_DC24_VACV_49C_r2.wiff	49C_r2	VIYIFTVRL	9	C56H90N12O12	VIYIFTVRL	VIYIFTVRL	VIYIFTVRL	VIYIFTVRL	0.9742	0.9938	#N/A	40.9+/-0.05	#N/A	1122.68	2	562.347	#N/A	40.95	713399	260404	452995	1009	1009	0	#N/A	0.009259	VACV			FALSE
20221007_MS_MRMhr_DC24_VACV_49C_r3.wiff	49C_r3	VIYIFTVRL	9	C56H90N12O12	VIYIFTVRL	VIYIFTVRL	VIYIFTVRL	VIYIFTVRL	0.9483	0.9935	#N/A	40.9+/-0.05	#N/A	1122.68	2	562.347	#N/A	40.95	134532	45645	88888	53	53	0	#N/A	0.002176	VACV			FALSE
20221007_MS_MRMhr_DC24_VACV_53C_r1.wiff	53C_r1	VIYIFTVRL	9	C56H90N12O12	VIYIFTVRL	VIYIFTVRL	VIYIFTVRL	VIYIFTVRL	0.9654	0.9952	#N/A	40.9+/-0.05	#N/A	1122.68	2	562.347	#N/A	40.95	1839479	652383	1187097	6709	6709	0	#N/A	0.030938	VACV			FALSE
20221007_MS_MRMhr_DC24_VACV_53C_r2.wiff	53C_r2	VIYIFTVRL	9	C56H90N12O12	VIYIFTVRL	VIYIFTVRL	VIYIFTVRL	VIYIFTVRL	0.9187	0.9788	#N/A	40.9+/-0.05	#N/A	1122.68	2	562.347	#N/A	40.95	55433	24207	31226	1223	1223	0	#N/A	0.001295	VACV			FALSE
20221007_MS_MRMhr_DC24_VACV_53C_r3.wiff	53C_r3	VIYIFTVRL	9	C56H90N12O12	VIYIFTVRL	VIYIFTVRL	VIYIFTVRL	VIYIFTVRL	0.9496	0.9942	#N/A	40.9+/-0.05	#N/A	1122.68	2	562.347	#N/A	40.95	292075	100138	191937	1194	1194	0	#N/A	0.005318	VACV			FALSE
20221007_MS_MRMhr_DC24_VACV_57C_r1.wiff	57C_r1	VIYIFTVRL	9	C56H90N12O12	VIYIFTVRL	VIYIFTVRL	VIYIFTVRL	VIYIFTVRL	0.9694	0.9979	#N/A	40.9+/-0.05	#N/A	1122.68	2	562.347	#N/A	40.95	2649938	909484	1740454	3514	3514	0	#N/A	0.080153	VACV			FALSE
20221007_MS_MRMhr_DC24_VACV_57C_r2.wiff	57C_r2	VIYIFTVRL	9	C56H90N12O12	VIYIFTVRL	VIYIFTVRL	VIYIFTVRL	VIYIFTVRL	0.975	0.9989	#N/A	40.9+/-0.05	#N/A	1122.68	2	562.347	#N/A	40.95	2909686	999594	1910091	6417	5659	758	#N/A	0.094034	VACV			FALSE
20221007_MS_MRMhr_DC24_VACV_57C_r3.wiff	57C_r3	VIYIFTVRL	9	C56H90N12O12	VIYIFTVRL	VIYIFTVRL	VIYIFTVRL	VIYIFTVRL	0.9728	0.9918	#N/A	40.9+/-0.05	#N/A	1122.68	2	562.347	#N/A	40.95	1893415	697317	1196098	6465	6465	0	#N/A	0.07173	VACV			FALSE
20221007_MS_MRMhr_DC24_VACV_61C_r1.wiff	61C_r1	VIYIFTVRL	9	C56H90N12O12	VIYIFTVRL	VIYIFTVRL	VIYIFTVRL	VIYIFTVRL	0.9639	0.9949	#N/A	40.9+/-0.05	#N/A	1122.68	2	562.347	#N/A	40.95	1010367	317219	693148	9321	9321	0	#N/A	0.047628	VACV			FALSE
20221007_MS_MRMhr_DC24_VACV_61C_r2.wiff	61C_r2	VIYIFTVRL	9	C56H90N12O12	VIYIFTVRL	VIYIFTVRL	VIYIFTVRL	VIYIFTVRL	0.979	0.99	#N/A	40.9+/-0.05	#N/A	1122.68	2	562.347	#N/A	40.95	984384	347287	637096	4386	4386	0	#N/A	0.047191	VACV			FALSE
20221007_MS_MRMhr_DC24_VACV_61C_r3.wiff	61C_r3	VIYIFTVRL	9	C56H90N12O12	VIYIFTVRL	VIYIFTVRL	VIYIFTVRL	VIYIFTVRL	0.9757	0.9959	#N/A	40.9+/-0.05	#N/A	1122.68	2	562.347	#N/A	40.95	1559088	499042	1060046	4925	4925	0	#N/A	0.066903	VACV			FALSE
20221007_MS_MRMhr_DC24_VACV_65C_r1.wiff	65C_r1	VIYIFTVRL	9	C56H90N12O12	VIYIFTVRL	VIYIFTVRL	VIYIFTVRL	VIYIFTVRL	0.9785	0.9969	#N/A	40.9+/-0.05	#N/A	1122.68	2	562.347	#N/A	40.95	5716748	2032999	3683749	36419	17577	18842	#N/A	âˆž	VACV			FALSE
20221007_MS_MRMhr_DC24_VACV_65C_r2.wiff	65C_r2	VIYIFTVRL	9	C56H90N12O12	VIYIFTVRL	VIYIFTVRL	VIYIFTVRL	VIYIFTVRL	0.9715	0.9971	#N/A	40.9+/-0.05	#N/A	1122.68	2	562.347	#N/A	40.95	2742740	973574	1769165	13601	13601	0	#N/A	âˆž	VACV			FALSE
20221007_MS_MRMhr_DC24_VACV_69C_r1.wiff	69C_r1	VIYIFTVRL	9	C56H90N12O12	VIYIFTVRL	VIYIFTVRL	VIYIFTVRL	VIYIFTVRL	0.9733	0.9971	#N/A	40.9+/-0.05	#N/A	1122.68	2	562.347	#N/A	40.95	9461532	3691018	5770513	51541	27992	23549	#N/A	âˆž	VACV			FALSE
20221007_MS_MRMhr_DC24_VACV_69C_r2.wiff	69C_r2	VIYIFTVRL	9	C56H90N12O12	VIYIFTVRL	VIYIFTVRL	VIYIFTVRL	VIYIFTVRL	0.9723	0.9944	#N/A	40.9+/-0.05	#N/A	1122.68	2	562.347	#N/A	40.95	7640024	2700133	4939891	49567	36988	12579	#N/A	âˆž	VACV			FALSE
20221007_MS_MRMhr_DC24_VACV_69C_r3.wiff	69C_r3	VIYIFTVRL	9	C56H90N12O12	VIYIFTVRL	VIYIFTVRL	VIYIFTVRL	VIYIFTVRL	0.9746	0.9996	#N/A	40.9+/-0.05	#N/A	1122.68	2	562.347	#N/A	40.95	9654312	3535049	6119266	68955	28047	40909	#N/A	âˆž	VACV			FALSE
20221007_MS_MRMhr_DC24_VACV_73C_r1.wiff	73C_r1	VIYIFTVRL	9	C56H90N12O12	VIYIFTVRL	VIYIFTVRL	VIYIFTVRL	VIYIFTVRL	0.9753	0.998	#N/A	40.9+/-0.05	#N/A	1122.68	2	562.347	#N/A	40.95	17459014	6549948	10909068	87123	34295	52829	#N/A	âˆž	VACV			FALSE
20221007_MS_MRMhr_DC24_VACV_73C_r2.wiff	73C_r2	VIYIFTVRL	9	C56H90N12O12	VIYIFTVRL	VIYIFTVRL	VIYIFTVRL	VIYIFTVRL	0.9755	0.9969	#N/A	40.9+/-0.05	#N/A	1122.68	2	562.347	#N/A	40.95	24508840	9205397	15303442	466475	144109	322366	#N/A	âˆž	VACV			FALSE
20221007_MS_MRMhr_DC24_VACV_73C_r3.wiff	73C_r3	VIYIFTVRL	9	C56H90N12O12	VIYIFTVRL	VIYIFTVRL	VIYIFTVRL	VIYIFTVRL	0.9712	0.9986	#N/A	40.9+/-0.05	#N/A	1122.68	2	562.347	#N/A	40.95	22006248	8070459	13935789	311292	135208	176084	#N/A	âˆž	VACV			FALSE
20221010_MS_zenoSWATH_DC24_VACV_37C_r1.wiff	SWATH_r1	SQIVDDDFI	9	C46H70N10O18	SQIVDDDFI	SQIVDDDFI	SQIVDDDFI	SQIVDDDFI	0.9728	0.9868	#N/A	31.45+/-0.08	#N/A	1050.49	2	526.251	#N/A	31.49	584917	217696	367221	11121	5735	5385	#N/A	0.004262	VACV			FALSE
20221010_MS_zenoSWATH_DC24_VACV_37C_r2.wiff	SWATH_r2	SQIVDDDFI	9	C46H70N10O18	SQIVDDDFI	SQIVDDDFI	SQIVDDDFI	SQIVDDDFI	0.982	0.9902	#N/A	31.45+/-0.08	#N/A	1050.49	2	526.251	#N/A	31.49	438286	162839	275447	7563	2186	5377	#N/A	0.004541	VACV			FALSE
20221010_MS_zenoSWATH_DC24_VACV_37C_r3.wiff	SWATH_r3	SQIVDDDFI	9	C46H70N10O18	SQIVDDDFI	SQIVDDDFI	SQIVDDDFI	SQIVDDDFI	0.9826	0.9902	#N/A	31.45+/-0.08	#N/A	1050.49	2	526.251	#N/A	31.49	488384	173772	314613	10523	4068	6455	#N/A	0.004278	VACV			FALSE
20221007_MS_MRMhr_DC24_VACV_37C_r1.wiff	37C_r1	SQIVDDDFI	9	C46H70N10O18	SQIVDDDFI	SQIVDDDFI	SQIVDDDFI	SQIVDDDFI	0.9808	0.9923	#N/A	31.45+/-0.08	#N/A	1050.49	2	526.251	#N/A	31.49	842300	391579	450721	0	0	0	#N/A	0.007111	VACV			FALSE
20221007_MS_MRMhr_DC24_VACV_37C_r2.wiff	37C_r2	SQIVDDDFI	9	C46H70N10O18	SQIVDDDFI	SQIVDDDFI	SQIVDDDFI	SQIVDDDFI	0.9783	0.9912	#N/A	31.45+/-0.08	#N/A	1050.49	2	526.251	#N/A	31.49	791252	400714	390538	0	0	0	#N/A	0.006608	VACV			FALSE
20221007_MS_MRMhr_DC24_VACV_37C_r3.wiff	37C_r3	SQIVDDDFI	9	C46H70N10O18	SQIVDDDFI	SQIVDDDFI	SQIVDDDFI	SQIVDDDFI	0.9692	0.9943	#N/A	31.45+/-0.08	#N/A	1050.49	2	526.251	#N/A	31.49	714555	351522	363034	0	0	0	#N/A	0.007164	VACV			FALSE
20221007_MS_MRMhr_DC24_VACV_41C_r1.wiff	41C_r1	SQIVDDDFI	9	C46H70N10O18	SQIVDDDFI	SQIVDDDFI	SQIVDDDFI	SQIVDDDFI	0.962	0.9946	#N/A	31.45+/-0.08	#N/A	1050.49	2	526.251	#N/A	31.49	574105	276411	297694	2475	0	2475	#N/A	0.00809	VACV			FALSE
20221007_MS_MRMhr_DC24_VACV_41C_r2.wiff	41C_r2	SQIVDDDFI	9	C46H70N10O18	SQIVDDDFI	SQIVDDDFI	SQIVDDDFI	SQIVDDDFI	0.9644	0.9965	#N/A	31.45+/-0.08	#N/A	1050.49	2	526.251	#N/A	31.49	807099	379569	427530	0	0	0	#N/A	0.007117	VACV			FALSE
20221007_MS_MRMhr_DC24_VACV_41C_r3.wiff	41C_r3	SQIVDDDFI	9	C46H70N10O18	SQIVDDDFI	SQIVDDDFI	SQIVDDDFI	SQIVDDDFI	0.9688	0.9915	#N/A	31.45+/-0.08	#N/A	1050.49	2	526.251	#N/A	31.49	813880	375067	438812	0	0	0	#N/A	0.006316	VACV			FALSE
20221007_MS_MRMhr_DC24_VACV_45C_r1.wiff	45C_r1	SQIVDDDFI	9	C46H70N10O18	SQIVDDDFI	SQIVDDDFI	SQIVDDDFI	SQIVDDDFI	0.9386	0.9929	#N/A	31.45+/-0.08	#N/A	1050.49	2	526.251	#N/A	31.49	474781	209402	265378	0	0	0	#N/A	0.004955	VACV			FALSE
20221007_MS_MRMhr_DC24_VACV_45C_r2.wiff	45C_r2	SQIVDDDFI	9	C46H70N10O18	SQIVDDDFI	SQIVDDDFI	SQIVDDDFI	SQIVDDDFI	0.973	0.9963	#N/A	31.45+/-0.08	#N/A	1050.49	2	526.251	#N/A	31.49	494070	227698	266372	0	0	0	#N/A	0.004839	VACV			FALSE
20221007_MS_MRMhr_DC24_VACV_45C_r3.wiff	45C_r3	SQIVDDDFI	9	C46H70N10O18	SQIVDDDFI	SQIVDDDFI	SQIVDDDFI	SQIVDDDFI	0.9785	0.9904	#N/A	31.45+/-0.08	#N/A	1050.49	2	526.251	#N/A	31.49	504607	226959	277648	0	0	0	#N/A	0.004574	VACV			FALSE
20221007_MS_MRMhr_DC24_VACV_49C_r1.wiff	49C_r1	SQIVDDDFI	9	C46H70N10O18	SQIVDDDFI	SQIVDDDFI	SQIVDDDFI	SQIVDDDFI	0.954	0.9758	#N/A	31.45+/-0.08	#N/A	1050.49	2	526.251	#N/A	31.49	173809	84316	89494	2618	2618	0	#N/A	0.002885	VACV			FALSE
20221007_MS_MRMhr_DC24_VACV_49C_r2.wiff	49C_r2	SQIVDDDFI	9	C46H70N10O18	SQIVDDDFI	SQIVDDDFI	SQIVDDDFI	SQIVDDDFI	0.966	0.9928	#N/A	31.45+/-0.08	#N/A	1050.49	2	526.251	#N/A	31.49	192363	100774	91589	0	0	0	#N/A	0.002497	VACV			FALSE
20221007_MS_MRMhr_DC24_VACV_49C_r3.wiff	49C_r3	SQIVDDDFI	9	C46H70N10O18	SQIVDDDFI	SQIVDDDFI	SQIVDDDFI	SQIVDDDFI	0.9144	0.9872	#N/A	31.45+/-0.08	#N/A	1050.49	2	526.251	#N/A	31.49	190933	89482	101451	993	993	0	#N/A	0.003088	VACV			FALSE
20221007_MS_MRMhr_DC24_VACV_53C_r1.wiff	53C_r1	SQIVDDDFI	9	C46H70N10O18	SQIVDDDFI	SQIVDDDFI	SQIVDDDFI	SQIVDDDFI	0.8618	0.962	#N/A	31.45+/-0.08	#N/A	1050.49	2	526.251	#N/A	31.49	44918	25512	19406	818	818	0	#N/A	0.000755	VACV			FALSE
20221007_MS_MRMhr_DC24_VACV_53C_r2.wiff	53C_r2	SQIVDDDFI	9	C46H70N10O18	SQIVDDDFI	SQIVDDDFI	SQIVDDDFI	SQIVDDDFI	0.9465	0.9745	#N/A	31.45+/-0.08	#N/A	1050.49	2	526.251	#N/A	31.49	83936	41082	42855	0	0	0	#N/A	0.00196	VACV			FALSE
20221007_MS_MRMhr_DC24_VACV_53C_r3.wiff	53C_r3	SQIVDDDFI	9	C46H70N10O18	SQIVDDDFI	SQIVDDDFI	SQIVDDDFI	SQIVDDDFI	0.8669	0.9781	#N/A	31.45+/-0.08	#N/A	1050.49	2	526.251	#N/A	31.49	70072	39780	30291	0	0	0	#N/A	0.001276	VACV			FALSE
20221007_MS_MRMhr_DC24_VACV_57C_r1.wiff	57C_r1	SQIVDDDFI	9	C46H70N10O18	SQIVDDDFI	SQIVDDDFI	SQIVDDDFI	SQIVDDDFI	0.7884	0.9948	#N/A	31.45+/-0.08	#N/A	1050.49	2	526.251	#N/A	31.49	22450	14239	8211	315	315	0	#N/A	0.000679	VACV			FALSE
20221007_MS_MRMhr_DC24_VACV_57C_r2.wiff	57C_r2	SQIVDDDFI	9	C46H70N10O18	SQIVDDDFI	SQIVDDDFI	SQIVDDDFI	SQIVDDDFI	0.7848	0.9673	#N/A	31.45+/-0.08	#N/A	1050.49	2	526.251	#N/A	31.49	17655	11737	5918	0	0	0	#N/A	0.000571	VACV			FALSE
20221007_MS_MRMhr_DC24_VACV_57C_r3.wiff	57C_r3	SQIVDDDFI	9	C46H70N10O18	SQIVDDDFI	SQIVDDDFI	SQIVDDDFI	SQIVDDDFI	0.5424	0.9819	#N/A	31.45+/-0.08	#N/A	1050.49	2	526.251	#N/A	31.49	13978	11716	2262	0	0	0	#N/A	0.00053	VACV			FALSE
20221007_MS_MRMhr_DC24_VACV_61C_r1.wiff	61C_r1	SQIVDDDFI	9	C46H70N10O18	SQIVDDDFI	SQIVDDDFI	SQIVDDDFI	SQIVDDDFI	0.5425	0.896	#N/A	31.45+/-0.08	#N/A	1050.49	2	526.251	#N/A	31.49	9041	6342	2699	0	0	0	#N/A	0.000426	VACV			FALSE
20221007_MS_MRMhr_DC24_VACV_61C_r2.wiff	61C_r2	SQIVDDDFI	9	C46H70N10O18	SQIVDDDFI	SQIVDDDFI	SQIVDDDFI	SQIVDDDFI	0	0.9322	#N/A	31.45+/-0.08	#N/A	1050.49	2	526.251	#N/A	31.49	5823	5823	0	0	0	0	#N/A	0.000279	VACV			FALSE
20221007_MS_MRMhr_DC24_VACV_61C_r3.wiff	61C_r3	SQIVDDDFI	9	C46H70N10O18	SQIVDDDFI	SQIVDDDFI	SQIVDDDFI	SQIVDDDFI	0.6445	0.9595	#N/A	31.45+/-0.08	#N/A	1050.49	2	526.251	#N/A	31.49	9918	7437	2481	0	0	0	#N/A	0.000426	VACV			FALSE
20221007_MS_MRMhr_DC24_VACV_65C_r1.wiff	65C_r1	SQIVDDDFI	9	C46H70N10O18	SQIVDDDFI	SQIVDDDFI	SQIVDDDFI	SQIVDDDFI	0	0.9206	#N/A	31.45+/-0.08	#N/A	1050.49	2	526.251	#N/A	31.49	2845	2845	0	0	0	0	#N/A	âˆž	VACV			FALSE
20221007_MS_MRMhr_DC24_VACV_65C_r2.wiff	65C_r2	SQIVDDDFI	9	C46H70N10O18	SQIVDDDFI	SQIVDDDFI	SQIVDDDFI	SQIVDDDFI	0	0.7567	#N/A	31.45+/-0.08	#N/A	1050.49	2	526.251	#N/A	31.49	2216	2216	0	0	0	0	#N/A	âˆž	VACV			FALSE
20221007_MS_MRMhr_DC24_VACV_69C_r1.wiff	69C_r1	SQIVDDDFI	9	C46H70N10O18	SQIVDDDFI	SQIVDDDFI	SQIVDDDFI	SQIVDDDFI	0	0.9276	#N/A	31.45+/-0.08	#N/A	1050.49	2	526.251	#N/A	31.49	1725	1725	0	0	0	0	#N/A	âˆž	VACV			FALSE
20221007_MS_MRMhr_DC24_VACV_69C_r2.wiff	69C_r2	SQIVDDDFI	9	C46H70N10O18	SQIVDDDFI	SQIVDDDFI	SQIVDDDFI	SQIVDDDFI	0	0.9349	#N/A	31.45+/-0.08	#N/A	1050.49	2	526.251	#N/A	31.49	1379	1379	0	0	0	0	#N/A	âˆž	VACV			FALSE
20221007_MS_MRMhr_DC24_VACV_69C_r3.wiff	69C_r3	SQIVDDDFI	9	C46H70N10O18	SQIVDDDFI	SQIVDDDFI	SQIVDDDFI	SQIVDDDFI	0	0.7794	#N/A	31.45+/-0.08	#N/A	1050.49	2	526.251	#N/A	31.49	2122	2122	0	0	0	0	#N/A	âˆž	VACV			FALSE
20221007_MS_MRMhr_DC24_VACV_73C_r1.wiff	73C_r1	SQIVDDDFI	9	C46H70N10O18	SQIVDDDFI	SQIVDDDFI	SQIVDDDFI	SQIVDDDFI	0.462	0.7852	#N/A	31.45+/-0.08	#N/A	1050.49	2	526.251	#N/A	31.49	3044	2480	564	0	0	0	#N/A	âˆž	VACV			FALSE
20221007_MS_MRMhr_DC24_VACV_73C_r2.wiff	73C_r2	SQIVDDDFI	9	C46H70N10O18	SQIVDDDFI	SQIVDDDFI	SQIVDDDFI	SQIVDDDFI	0	0.928	#N/A	31.45+/-0.08	#N/A	1050.49	2	526.251	#N/A	31.49	1067	1067	0	0	0	0	#N/A	âˆž	VACV			FALSE
20221007_MS_MRMhr_DC24_VACV_73C_r3.wiff	73C_r3	SQIVDDDFI	9	C46H70N10O18	SQIVDDDFI	SQIVDDDFI	SQIVDDDFI	SQIVDDDFI	0.2652	0.4439	#N/A	31.45+/-0.08	#N/A	1050.49	2	526.251	#N/A	31.49	1729	1703	26	523	523	0	#N/A	âˆž	VACV			FALSE
20221010_MS_zenoSWATH_DC24_VACV_37C_r1.wiff	SWATH_r1	SQIVDDDFI	9	C46H69N9O19	SQ[+1]IVDDDFI	SQ(unimod:7)IVDDDFI	SQ[Dea]IVDDDFI	SQ[Deamidated (NQ)]IVDDDFI	0.6254	0.9022	#N/A	31.43+/-0.1	#N/A	1051.47	2	526.743	#N/A	31.46	139910	96923	42987	0	0	0	#N/A	0.001019	VACV			FALSE
20221010_MS_zenoSWATH_DC24_VACV_37C_r2.wiff	SWATH_r2	SQIVDDDFI	9	C46H69N9O19	SQ[+1]IVDDDFI	SQ(unimod:7)IVDDDFI	SQ[Dea]IVDDDFI	SQ[Deamidated (NQ)]IVDDDFI	0.6912	0.8482	#N/A	31.43+/-0.1	#N/A	1051.47	2	526.743	#N/A	31.46	114063	71006	43057	793	793	0	#N/A	0.001182	VACV			FALSE
20221010_MS_zenoSWATH_DC24_VACV_37C_r3.wiff	SWATH_r3	SQIVDDDFI	9	C46H69N9O19	SQ[+1]IVDDDFI	SQ(unimod:7)IVDDDFI	SQ[Dea]IVDDDFI	SQ[Deamidated (NQ)]IVDDDFI	0.7446	0.8357	#N/A	31.43+/-0.1	#N/A	1051.47	2	526.743	#N/A	31.46	118438	77063	41375	330	330	0	#N/A	0.001038	VACV			FALSE
20221007_MS_MRMhr_DC24_VACV_37C_r1.wiff	37C_r1	SQIVDDDFI	9	C46H69N9O19	SQ[+1]IVDDDFI	SQ(unimod:7)IVDDDFI	SQ[Dea]IVDDDFI	SQ[Deamidated (NQ)]IVDDDFI	0	0.874	#N/A	31.43+/-0.1	#N/A	1051.47	2	526.743	#N/A	31.46	140415	140415	#N/A	0	0	#N/A	#N/A	0.001185	VACV			FALSE
20221007_MS_MRMhr_DC24_VACV_37C_r2.wiff	37C_r2	SQIVDDDFI	9	C46H69N9O19	SQ[+1]IVDDDFI	SQ(unimod:7)IVDDDFI	SQ[Dea]IVDDDFI	SQ[Deamidated (NQ)]IVDDDFI	0	0.9054	#N/A	31.43+/-0.1	#N/A	1051.47	2	526.743	#N/A	31.46	199661	199661	#N/A	0	0	#N/A	#N/A	0.001667	VACV			FALSE
20221007_MS_MRMhr_DC24_VACV_37C_r3.wiff	37C_r3	SQIVDDDFI	9	C46H69N9O19	SQ[+1]IVDDDFI	SQ(unimod:7)IVDDDFI	SQ[Dea]IVDDDFI	SQ[Deamidated (NQ)]IVDDDFI	0	0.9004	#N/A	31.43+/-0.1	#N/A	1051.47	2	526.743	#N/A	31.46	158458	158458	#N/A	0	0	#N/A	#N/A	0.001589	VACV			FALSE
20221007_MS_MRMhr_DC24_VACV_41C_r1.wiff	41C_r1	SQIVDDDFI	9	C46H69N9O19	SQ[+1]IVDDDFI	SQ(unimod:7)IVDDDFI	SQ[Dea]IVDDDFI	SQ[Deamidated (NQ)]IVDDDFI	0	0.8882	#N/A	31.43+/-0.1	#N/A	1051.47	2	526.743	#N/A	31.46	128840	128840	#N/A	0	0	#N/A	#N/A	0.001816	VACV			FALSE
20221007_MS_MRMhr_DC24_VACV_41C_r2.wiff	41C_r2	SQIVDDDFI	9	C46H69N9O19	SQ[+1]IVDDDFI	SQ(unimod:7)IVDDDFI	SQ[Dea]IVDDDFI	SQ[Deamidated (NQ)]IVDDDFI	0	0.8747	#N/A	31.43+/-0.1	#N/A	1051.47	2	526.743	#N/A	31.46	177161	177161	#N/A	0	0	#N/A	#N/A	0.001562	VACV			FALSE
20221007_MS_MRMhr_DC24_VACV_41C_r3.wiff	41C_r3	SQIVDDDFI	9	C46H69N9O19	SQ[+1]IVDDDFI	SQ(unimod:7)IVDDDFI	SQ[Dea]IVDDDFI	SQ[Deamidated (NQ)]IVDDDFI	0	0.8568	#N/A	31.43+/-0.1	#N/A	1051.47	2	526.743	#N/A	31.46	161492	161492	#N/A	8276	8276	#N/A	#N/A	0.001253	VACV			FALSE
20221007_MS_MRMhr_DC24_VACV_45C_r1.wiff	45C_r1	SQIVDDDFI	9	C46H69N9O19	SQ[+1]IVDDDFI	SQ(unimod:7)IVDDDFI	SQ[Dea]IVDDDFI	SQ[Deamidated (NQ)]IVDDDFI	0	0.8814	#N/A	31.43+/-0.1	#N/A	1051.47	2	526.743	#N/A	31.46	96240	96240	#N/A	0	0	#N/A	#N/A	0.001004	VACV			FALSE
20221007_MS_MRMhr_DC24_VACV_45C_r2.wiff	45C_r2	SQIVDDDFI	9	C46H69N9O19	SQ[+1]IVDDDFI	SQ(unimod:7)IVDDDFI	SQ[Dea]IVDDDFI	SQ[Deamidated (NQ)]IVDDDFI	0	0.8643	#N/A	31.43+/-0.1	#N/A	1051.47	2	526.743	#N/A	31.46	104558	104558	#N/A	0	0	#N/A	#N/A	0.001024	VACV			FALSE
20221007_MS_MRMhr_DC24_VACV_45C_r3.wiff	45C_r3	SQIVDDDFI	9	C46H69N9O19	SQ[+1]IVDDDFI	SQ(unimod:7)IVDDDFI	SQ[Dea]IVDDDFI	SQ[Deamidated (NQ)]IVDDDFI	0	0.8854	#N/A	31.43+/-0.1	#N/A	1051.47	2	526.743	#N/A	31.46	102341	102341	#N/A	1503	1503	#N/A	#N/A	0.000928	VACV			FALSE
20221007_MS_MRMhr_DC24_VACV_49C_r1.wiff	49C_r1	SQIVDDDFI	9	C46H69N9O19	SQ[+1]IVDDDFI	SQ(unimod:7)IVDDDFI	SQ[Dea]IVDDDFI	SQ[Deamidated (NQ)]IVDDDFI	0	0.9202	#N/A	31.43+/-0.1	#N/A	1051.47	2	526.743	#N/A	31.46	49102	49102	#N/A	0	0	#N/A	#N/A	0.000815	VACV			FALSE
20221007_MS_MRMhr_DC24_VACV_49C_r2.wiff	49C_r2	SQIVDDDFI	9	C46H69N9O19	SQ[+1]IVDDDFI	SQ(unimod:7)IVDDDFI	SQ[Dea]IVDDDFI	SQ[Deamidated (NQ)]IVDDDFI	0	0.7787	#N/A	31.43+/-0.1	#N/A	1051.47	2	526.743	#N/A	31.46	44621	44621	#N/A	0	0	#N/A	#N/A	0.000579	VACV			FALSE
20221007_MS_MRMhr_DC24_VACV_49C_r3.wiff	49C_r3	SQIVDDDFI	9	C46H69N9O19	SQ[+1]IVDDDFI	SQ(unimod:7)IVDDDFI	SQ[Dea]IVDDDFI	SQ[Deamidated (NQ)]IVDDDFI	0	0.8744	#N/A	31.43+/-0.1	#N/A	1051.47	2	526.743	#N/A	31.46	42033	42033	#N/A	0	0	#N/A	#N/A	0.00068	VACV			FALSE
20221007_MS_MRMhr_DC24_VACV_53C_r1.wiff	53C_r1	SQIVDDDFI	9	C46H69N9O19	SQ[+1]IVDDDFI	SQ(unimod:7)IVDDDFI	SQ[Dea]IVDDDFI	SQ[Deamidated (NQ)]IVDDDFI	0	0.9027	#N/A	31.43+/-0.1	#N/A	1051.47	2	526.743	#N/A	31.46	15687	15687	#N/A	0	0	#N/A	#N/A	0.000264	VACV			FALSE
20221007_MS_MRMhr_DC24_VACV_53C_r2.wiff	53C_r2	SQIVDDDFI	9	C46H69N9O19	SQ[+1]IVDDDFI	SQ(unimod:7)IVDDDFI	SQ[Dea]IVDDDFI	SQ[Deamidated (NQ)]IVDDDFI	0	0.8604	#N/A	31.43+/-0.1	#N/A	1051.47	2	526.743	#N/A	31.46	16547	16547	#N/A	1029	1029	#N/A	#N/A	0.000386	VACV			FALSE
20221007_MS_MRMhr_DC24_VACV_53C_r3.wiff	53C_r3	SQIVDDDFI	9	C46H69N9O19	SQ[+1]IVDDDFI	SQ(unimod:7)IVDDDFI	SQ[Dea]IVDDDFI	SQ[Deamidated (NQ)]IVDDDFI	0	0.9484	#N/A	31.43+/-0.1	#N/A	1051.47	2	526.743	#N/A	31.46	19933	19933	#N/A	0	0	#N/A	#N/A	0.000363	VACV			FALSE
20221007_MS_MRMhr_DC24_VACV_57C_r1.wiff	57C_r1	SQIVDDDFI	9	C46H69N9O19	SQ[+1]IVDDDFI	SQ(unimod:7)IVDDDFI	SQ[Dea]IVDDDFI	SQ[Deamidated (NQ)]IVDDDFI	0	0.8878	#N/A	31.43+/-0.1	#N/A	1051.47	2	526.743	#N/A	31.46	8023	8023	#N/A	0	0	#N/A	#N/A	0.000243	VACV			FALSE
20221007_MS_MRMhr_DC24_VACV_57C_r2.wiff	57C_r2	SQIVDDDFI	9	C46H69N9O19	SQ[+1]IVDDDFI	SQ(unimod:7)IVDDDFI	SQ[Dea]IVDDDFI	SQ[Deamidated (NQ)]IVDDDFI	0	0.8863	#N/A	31.43+/-0.1	#N/A	1051.47	2	526.743	#N/A	31.46	6096	6096	#N/A	0	0	#N/A	#N/A	0.000197	VACV			FALSE
20221007_MS_MRMhr_DC24_VACV_57C_r3.wiff	57C_r3	SQIVDDDFI	9	C46H69N9O19	SQ[+1]IVDDDFI	SQ(unimod:7)IVDDDFI	SQ[Dea]IVDDDFI	SQ[Deamidated (NQ)]IVDDDFI	0	0.8687	#N/A	31.43+/-0.1	#N/A	1051.47	2	526.743	#N/A	31.46	5828	5828	#N/A	822	822	#N/A	#N/A	0.000221	VACV			FALSE
20221007_MS_MRMhr_DC24_VACV_61C_r1.wiff	61C_r1	SQIVDDDFI	9	C46H69N9O19	SQ[+1]IVDDDFI	SQ(unimod:7)IVDDDFI	SQ[Dea]IVDDDFI	SQ[Deamidated (NQ)]IVDDDFI	0	0.6806	#N/A	31.43+/-0.1	#N/A	1051.47	2	526.743	#N/A	31.46	4164	4164	#N/A	0	0	#N/A	#N/A	0.000196	VACV			FALSE
20221007_MS_MRMhr_DC24_VACV_61C_r2.wiff	61C_r2	SQIVDDDFI	9	C46H69N9O19	SQ[+1]IVDDDFI	SQ(unimod:7)IVDDDFI	SQ[Dea]IVDDDFI	SQ[Deamidated (NQ)]IVDDDFI	0	0.8491	#N/A	31.43+/-0.1	#N/A	1051.47	2	526.743	#N/A	31.46	2392	2392	#N/A	0	0	#N/A	#N/A	0.000115	VACV			FALSE
20221007_MS_MRMhr_DC24_VACV_61C_r3.wiff	61C_r3	SQIVDDDFI	9	C46H69N9O19	SQ[+1]IVDDDFI	SQ(unimod:7)IVDDDFI	SQ[Dea]IVDDDFI	SQ[Deamidated (NQ)]IVDDDFI	0	0.8427	#N/A	31.43+/-0.1	#N/A	1051.47	2	526.743	#N/A	31.46	3684	3684	#N/A	0	0	#N/A	#N/A	0.000158	VACV			FALSE
20221007_MS_MRMhr_DC24_VACV_65C_r1.wiff	65C_r1	SQIVDDDFI	9	C46H69N9O19	SQ[+1]IVDDDFI	SQ(unimod:7)IVDDDFI	SQ[Dea]IVDDDFI	SQ[Deamidated (NQ)]IVDDDFI	0	0.717	#N/A	31.43+/-0.1	#N/A	1051.47	2	526.743	#N/A	31.46	2493	2493	#N/A	0	0	#N/A	#N/A	âˆž	VACV			FALSE
20221007_MS_MRMhr_DC24_VACV_65C_r2.wiff	65C_r2	SQIVDDDFI	9	C46H69N9O19	SQ[+1]IVDDDFI	SQ(unimod:7)IVDDDFI	SQ[Dea]IVDDDFI	SQ[Deamidated (NQ)]IVDDDFI	0	0.7559	#N/A	31.43+/-0.1	#N/A	1051.47	2	526.743	#N/A	31.46	1424	1424	#N/A	0	0	#N/A	#N/A	âˆž	VACV			FALSE
20221007_MS_MRMhr_DC24_VACV_69C_r1.wiff	69C_r1	SQIVDDDFI	9	C46H69N9O19	SQ[+1]IVDDDFI	SQ(unimod:7)IVDDDFI	SQ[Dea]IVDDDFI	SQ[Deamidated (NQ)]IVDDDFI	0	0.7973	#N/A	31.43+/-0.1	#N/A	1051.47	2	526.743	#N/A	31.46	2032	2032	#N/A	0	0	#N/A	#N/A	âˆž	VACV			FALSE
20221007_MS_MRMhr_DC24_VACV_69C_r2.wiff	69C_r2	SQIVDDDFI	9	C46H69N9O19	SQ[+1]IVDDDFI	SQ(unimod:7)IVDDDFI	SQ[Dea]IVDDDFI	SQ[Deamidated (NQ)]IVDDDFI	0	0.9071	#N/A	31.43+/-0.1	#N/A	1051.47	2	526.743	#N/A	31.46	1802	1802	#N/A	0	0	#N/A	#N/A	âˆž	VACV			FALSE
20221007_MS_MRMhr_DC24_VACV_69C_r3.wiff	69C_r3	SQIVDDDFI	9	C46H69N9O19	SQ[+1]IVDDDFI	SQ(unimod:7)IVDDDFI	SQ[Dea]IVDDDFI	SQ[Deamidated (NQ)]IVDDDFI	0	0.5654	#N/A	31.43+/-0.1	#N/A	1051.47	2	526.743	#N/A	31.46	992	992	#N/A	0	0	#N/A	#N/A	âˆž	VACV			FALSE
20221007_MS_MRMhr_DC24_VACV_73C_r1.wiff	73C_r1	SQIVDDDFI	9	C46H69N9O19	SQ[+1]IVDDDFI	SQ(unimod:7)IVDDDFI	SQ[Dea]IVDDDFI	SQ[Deamidated (NQ)]IVDDDFI	0	0.9559	#N/A	31.43+/-0.1	#N/A	1051.47	2	526.743	#N/A	31.46	1200	1200	#N/A	0	0	#N/A	#N/A	âˆž	VACV			FALSE
20221007_MS_MRMhr_DC24_VACV_73C_r2.wiff	73C_r2	SQIVDDDFI	9	C46H69N9O19	SQ[+1]IVDDDFI	SQ(unimod:7)IVDDDFI	SQ[Dea]IVDDDFI	SQ[Deamidated (NQ)]IVDDDFI	0	0.6995	#N/A	31.43+/-0.1	#N/A	1051.47	2	526.743	#N/A	31.46	495	495	#N/A	467	467	#N/A	#N/A	âˆž	VACV			FALSE
20221007_MS_MRMhr_DC24_VACV_73C_r3.wiff	73C_r3	SQIVDDDFI	9	C46H69N9O19	SQ[+1]IVDDDFI	SQ(unimod:7)IVDDDFI	SQ[Dea]IVDDDFI	SQ[Deamidated (NQ)]IVDDDFI	0	0.9293	#N/A	31.43+/-0.1	#N/A	1051.47	2	526.743	#N/A	31.46	2421	2421	#N/A	0	0	#N/A	#N/A	âˆž	VACV			FALSE
20221010_MS_zenoSWATH_DC24_VACV_37C_r1.wiff	SWATH_r1	VTKYYINL	8	C49H76N10O13	VTKYYINL	VTKYYINL	VTKYYINL	VTKYYINL	0.9671	0.996	#N/A	26.46+/-0.05	#N/A	1012.56	2	507.287	#N/A	26.53	619111	278635	340476	8131	7359	772	#N/A	0.004511	VACV			FALSE
20221010_MS_zenoSWATH_DC24_VACV_37C_r2.wiff	SWATH_r2	VTKYYINL	8	C49H76N10O13	VTKYYINL	VTKYYINL	VTKYYINL	VTKYYINL	0.9542	0.9955	#N/A	26.46+/-0.05	#N/A	1012.56	2	507.287	#N/A	26.53	453736	203335	250401	4735	4209	526	#N/A	0.004701	VACV			FALSE
20221010_MS_zenoSWATH_DC24_VACV_37C_r3.wiff	SWATH_r3	VTKYYINL	8	C49H76N10O13	VTKYYINL	VTKYYINL	VTKYYINL	VTKYYINL	0.9783	0.9982	#N/A	26.46+/-0.05	#N/A	1012.56	2	507.287	#N/A	26.53	510594	226659	283935	3696	3107	589	#N/A	0.004473	VACV			FALSE
20221007_MS_MRMhr_DC24_VACV_37C_r1.wiff	37C_r1	VTKYYINL	8	C49H76N10O13	VTKYYINL	VTKYYINL	VTKYYINL	VTKYYINL	0.9838	0.9984	#N/A	26.46+/-0.05	#N/A	1012.56	2	507.287	#N/A	26.53	759135	422043	337092	12006	12006	0	#N/A	0.006409	VACV			FALSE
20221007_MS_MRMhr_DC24_VACV_37C_r2.wiff	37C_r2	VTKYYINL	8	C49H76N10O13	VTKYYINL	VTKYYINL	VTKYYINL	VTKYYINL	0.983	0.9966	#N/A	26.46+/-0.05	#N/A	1012.56	2	507.287	#N/A	26.53	802933	447293	355641	12458	12217	241	#N/A	0.006706	VACV			FALSE
20221007_MS_MRMhr_DC24_VACV_37C_r3.wiff	37C_r3	VTKYYINL	8	C49H76N10O13	VTKYYINL	VTKYYINL	VTKYYINL	VTKYYINL	0.9662	0.997	#N/A	26.46+/-0.05	#N/A	1012.56	2	507.287	#N/A	26.53	688044	381412	306632	9462	9462	0	#N/A	0.006898	VACV			FALSE
20221007_MS_MRMhr_DC24_VACV_41C_r1.wiff	41C_r1	VTKYYINL	8	C49H76N10O13	VTKYYINL	VTKYYINL	VTKYYINL	VTKYYINL	0.9829	0.9967	#N/A	26.46+/-0.05	#N/A	1012.56	2	507.287	#N/A	26.53	443199	253265	189934	7451	7451	0	#N/A	0.006246	VACV			FALSE
20221007_MS_MRMhr_DC24_VACV_41C_r2.wiff	41C_r2	VTKYYINL	8	C49H76N10O13	VTKYYINL	VTKYYINL	VTKYYINL	VTKYYINL	0.9756	0.9975	#N/A	26.46+/-0.05	#N/A	1012.56	2	507.287	#N/A	26.53	764193	431614	332580	5526	5526	0	#N/A	0.006738	VACV			FALSE
20221007_MS_MRMhr_DC24_VACV_41C_r3.wiff	41C_r3	VTKYYINL	8	C49H76N10O13	VTKYYINL	VTKYYINL	VTKYYINL	VTKYYINL	0.9667	0.9927	#N/A	26.46+/-0.05	#N/A	1012.56	2	507.287	#N/A	26.53	848819	463940	384879	7282	7282	0	#N/A	0.006587	VACV			FALSE
20221007_MS_MRMhr_DC24_VACV_45C_r1.wiff	45C_r1	VTKYYINL	8	C49H76N10O13	VTKYYINL	VTKYYINL	VTKYYINL	VTKYYINL	0.9792	0.9956	#N/A	26.46+/-0.05	#N/A	1012.56	2	507.287	#N/A	26.53	464795	265102	199693	5487	5487	0	#N/A	0.004851	VACV			FALSE
20221007_MS_MRMhr_DC24_VACV_45C_r2.wiff	45C_r2	VTKYYINL	8	C49H76N10O13	VTKYYINL	VTKYYINL	VTKYYINL	VTKYYINL	0.9765	0.9849	#N/A	26.46+/-0.05	#N/A	1012.56	2	507.287	#N/A	26.53	529314	299907	229407	6617	6617	0	#N/A	0.005185	VACV			FALSE
20221007_MS_MRMhr_DC24_VACV_45C_r3.wiff	45C_r3	VTKYYINL	8	C49H76N10O13	VTKYYINL	VTKYYINL	VTKYYINL	VTKYYINL	0.9784	0.9926	#N/A	26.46+/-0.05	#N/A	1012.56	2	507.287	#N/A	26.53	585733	330180	255553	8322	8322	0	#N/A	0.00531	VACV			FALSE
20221007_MS_MRMhr_DC24_VACV_49C_r1.wiff	49C_r1	VTKYYINL	8	C49H76N10O13	VTKYYINL	VTKYYINL	VTKYYINL	VTKYYINL	0.8941	0.9888	#N/A	26.46+/-0.05	#N/A	1012.56	2	507.287	#N/A	26.53	82077	48625	33452	1636	1636	0	#N/A	0.001363	VACV			FALSE
20221007_MS_MRMhr_DC24_VACV_49C_r2.wiff	49C_r2	VTKYYINL	8	C49H76N10O13	VTKYYINL	VTKYYINL	VTKYYINL	VTKYYINL	0.9774	0.9929	#N/A	26.46+/-0.05	#N/A	1012.56	2	507.287	#N/A	26.53	289286	166567	122718	6011	6011	0	#N/A	0.003755	VACV			FALSE
20221007_MS_MRMhr_DC24_VACV_49C_r3.wiff	49C_r3	VTKYYINL	8	C49H76N10O13	VTKYYINL	VTKYYINL	VTKYYINL	VTKYYINL	0.9743	0.9906	#N/A	26.46+/-0.05	#N/A	1012.56	2	507.287	#N/A	26.53	246859	128880	117979	5045	5045	0	#N/A	0.003993	VACV			FALSE
20221007_MS_MRMhr_DC24_VACV_53C_r1.wiff	53C_r1	VTKYYINL	8	C49H76N10O13	VTKYYINL	VTKYYINL	VTKYYINL	VTKYYINL	0.8831	0.9854	#N/A	26.46+/-0.05	#N/A	1012.56	2	507.287	#N/A	26.53	67165	42790	24374	2035	2035	0	#N/A	0.00113	VACV			FALSE
20221007_MS_MRMhr_DC24_VACV_53C_r2.wiff	53C_r2	VTKYYINL	8	C49H76N10O13	VTKYYINL	VTKYYINL	VTKYYINL	VTKYYINL	0.9605	0.9708	#N/A	26.46+/-0.05	#N/A	1012.56	2	507.287	#N/A	26.53	61841	40970	20872	1562	1562	0	#N/A	0.001444	VACV			FALSE
20221007_MS_MRMhr_DC24_VACV_53C_r3.wiff	53C_r3	VTKYYINL	8	C49H76N10O13	VTKYYINL	VTKYYINL	VTKYYINL	VTKYYINL	0.8893	0.9961	#N/A	26.46+/-0.05	#N/A	1012.56	2	507.287	#N/A	26.53	81814	51508	30306	970	970	0	#N/A	0.00149	VACV			FALSE
20221007_MS_MRMhr_DC24_VACV_57C_r1.wiff	57C_r1	VTKYYINL	8	C49H76N10O13	VTKYYINL	VTKYYINL	VTKYYINL	VTKYYINL	0.3411	0.7954	#N/A	26.46+/-0.05	#N/A	1012.56	2	507.287	#N/A	26.53	18171	17999	171	747	747	0	#N/A	0.00055	VACV			FALSE
20221007_MS_MRMhr_DC24_VACV_57C_r2.wiff	57C_r2	VTKYYINL	8	C49H76N10O13	VTKYYINL	VTKYYINL	VTKYYINL	VTKYYINL	0.4941	0.8419	#N/A	26.46+/-0.05	#N/A	1012.56	2	507.287	#N/A	26.53	17721	17309	412	279	279	0	#N/A	0.000573	VACV			FALSE
20221007_MS_MRMhr_DC24_VACV_57C_r3.wiff	57C_r3	VTKYYINL	8	C49H76N10O13	VTKYYINL	VTKYYINL	VTKYYINL	VTKYYINL	0.4762	0.8074	#N/A	26.46+/-0.05	#N/A	1012.56	2	507.287	#N/A	26.53	12501	12152	349	3175	3175	0	#N/A	0.000474	VACV			FALSE
20221007_MS_MRMhr_DC24_VACV_61C_r1.wiff	61C_r1	VTKYYINL	8	C49H76N10O13	VTKYYINL	VTKYYINL	VTKYYINL	VTKYYINL	0.2397	0.7881	#N/A	26.46+/-0.05	#N/A	1012.56	2	507.287	#N/A	26.53	24808	24472	336	1501	1501	0	#N/A	0.001169	VACV			FALSE
20221007_MS_MRMhr_DC24_VACV_61C_r2.wiff	61C_r2	VTKYYINL	8	C49H76N10O13	VTKYYINL	VTKYYINL	VTKYYINL	VTKYYINL	0.3036	0.8154	#N/A	26.46+/-0.05	#N/A	1012.56	2	507.287	#N/A	26.53	14351	14208	143	551	551	0	#N/A	0.000688	VACV			FALSE
20221007_MS_MRMhr_DC24_VACV_61C_r3.wiff	61C_r3	VTKYYINL	8	C49H76N10O13	VTKYYINL	VTKYYINL	VTKYYINL	VTKYYINL	0.4294	0.7935	#N/A	26.46+/-0.05	#N/A	1012.56	2	507.287	#N/A	26.53	16518	16077	441	0	0	0	#N/A	0.000709	VACV			FALSE
20221007_MS_MRMhr_DC24_VACV_65C_r1.wiff	65C_r1	VTKYYINL	8	C49H76N10O13	VTKYYINL	VTKYYINL	VTKYYINL	VTKYYINL	0.3036	0.8593	#N/A	26.46+/-0.05	#N/A	1012.56	2	507.287	#N/A	26.53	10218	10043	175	260	260	0	#N/A	âˆž	VACV			FALSE
20221007_MS_MRMhr_DC24_VACV_65C_r2.wiff	65C_r2	VTKYYINL	8	C49H76N10O13	VTKYYINL	VTKYYINL	VTKYYINL	VTKYYINL	0	0.8211	#N/A	26.46+/-0.05	#N/A	1012.56	2	507.287	#N/A	26.53	3781	3781	0	1222	1222	0	#N/A	âˆž	VACV			FALSE
20221007_MS_MRMhr_DC24_VACV_69C_r1.wiff	69C_r1	VTKYYINL	8	C49H76N10O13	VTKYYINL	VTKYYINL	VTKYYINL	VTKYYINL	0	0.8578	#N/A	26.46+/-0.05	#N/A	1012.56	2	507.287	#N/A	26.53	6089	6089	0	1026	1026	0	#N/A	âˆž	VACV			FALSE
20221007_MS_MRMhr_DC24_VACV_69C_r2.wiff	69C_r2	VTKYYINL	8	C49H76N10O13	VTKYYINL	VTKYYINL	VTKYYINL	VTKYYINL	0	0.8749	#N/A	26.46+/-0.05	#N/A	1012.56	2	507.287	#N/A	26.53	3317	3317	0	3562	3562	0	#N/A	âˆž	VACV			FALSE
20221007_MS_MRMhr_DC24_VACV_69C_r3.wiff	69C_r3	VTKYYINL	8	C49H76N10O13	VTKYYINL	VTKYYINL	VTKYYINL	VTKYYINL	0	0.6933	#N/A	26.46+/-0.05	#N/A	1012.56	2	507.287	#N/A	26.53	3535	3535	0	3283	3283	0	#N/A	âˆž	VACV			FALSE
20221007_MS_MRMhr_DC24_VACV_73C_r1.wiff	73C_r1	VTKYYINL	8	C49H76N10O13	VTKYYINL	VTKYYINL	VTKYYINL	VTKYYINL	0	0.8604	#N/A	26.46+/-0.05	#N/A	1012.56	2	507.287	#N/A	26.53	4629	4629	0	0	0	0	#N/A	âˆž	VACV			FALSE
20221007_MS_MRMhr_DC24_VACV_73C_r2.wiff	73C_r2	VTKYYINL	8	C49H76N10O13	VTKYYINL	VTKYYINL	VTKYYINL	VTKYYINL	0.3036	0.804	#N/A	26.46+/-0.05	#N/A	1012.56	2	507.287	#N/A	26.53	10662	10229	433	0	0	0	#N/A	âˆž	VACV			FALSE
20221007_MS_MRMhr_DC24_VACV_73C_r3.wiff	73C_r3	VTKYYINL	8	C49H76N10O13	VTKYYINL	VTKYYINL	VTKYYINL	VTKYYINL	0.2397	0.7632	#N/A	26.46+/-0.05	#N/A	1012.56	2	507.287	#N/A	26.53	10375	9849	526	385	385	0	#N/A	âˆž	VACV			FALSE
20221010_MS_zenoSWATH_DC24_VACV_37C_r1.wiff	SWATH_r1	SAPMNVDNLIM	11	C50H85N13O17S2	SAPMNVDNLIM	SAPMNVDNLIM	SAPMNVDNLIM	SAPMNVDNLIM	0.9494	0.9796	#N/A	35.5+/-0.1	#N/A	1203.56	2	602.789	#N/A	35.51	60530	29092	31438	0	0	0	#N/A	0.000441	VACV			FALSE
20221010_MS_zenoSWATH_DC24_VACV_37C_r2.wiff	SWATH_r2	SAPMNVDNLIM	11	C50H85N13O17S2	SAPMNVDNLIM	SAPMNVDNLIM	SAPMNVDNLIM	SAPMNVDNLIM	0.9729	0.9927	#N/A	35.5+/-0.1	#N/A	1203.56	2	602.789	#N/A	35.51	772648	343037	429612	12181	6545	5636	#N/A	0.008006	VACV			FALSE
20221010_MS_zenoSWATH_DC24_VACV_37C_r3.wiff	SWATH_r3	SAPMNVDNLIM	11	C50H85N13O17S2	SAPMNVDNLIM	SAPMNVDNLIM	SAPMNVDNLIM	SAPMNVDNLIM	0.969	0.9879	#N/A	35.5+/-0.1	#N/A	1203.56	2	602.789	#N/A	35.51	59783	28689	31095	53	53	0	#N/A	0.000524	VACV			FALSE
20221007_MS_MRMhr_DC24_VACV_37C_r1.wiff	37C_r1	SAPMNVDNLIM	11	C50H85N13O17S2	SAPMNVDNLIM	SAPMNVDNLIM	SAPMNVDNLIM	SAPMNVDNLIM	0.8477	0.9852	#N/A	35.5+/-0.1	#N/A	1203.56	2	602.789	#N/A	35.51	104975	75397	29578	189	189	0	#N/A	0.000886	VACV			FALSE
20221007_MS_MRMhr_DC24_VACV_37C_r2.wiff	37C_r2	SAPMNVDNLIM	11	C50H85N13O17S2	SAPMNVDNLIM	SAPMNVDNLIM	SAPMNVDNLIM	SAPMNVDNLIM	0.9702	0.9969	#N/A	35.5+/-0.1	#N/A	1203.56	2	602.789	#N/A	35.51	1763588	1114472	649116	8203	8203	0	#N/A	0.014729	VACV			FALSE
20221007_MS_MRMhr_DC24_VACV_37C_r3.wiff	37C_r3	SAPMNVDNLIM	11	C50H85N13O17S2	SAPMNVDNLIM	SAPMNVDNLIM	SAPMNVDNLIM	SAPMNVDNLIM	0.8476	0.9884	#N/A	35.5+/-0.1	#N/A	1203.56	2	602.789	#N/A	35.51	127762	79321	48441	0	0	0	#N/A	0.001281	VACV			FALSE
20221007_MS_MRMhr_DC24_VACV_41C_r1.wiff	41C_r1	SAPMNVDNLIM	11	C50H85N13O17S2	SAPMNVDNLIM	SAPMNVDNLIM	SAPMNVDNLIM	SAPMNVDNLIM	0.9476	0.9952	#N/A	35.5+/-0.1	#N/A	1203.56	2	602.789	#N/A	35.51	757609	482078	275531	3792	3792	0	#N/A	0.010676	VACV			FALSE
20221007_MS_MRMhr_DC24_VACV_41C_r2.wiff	41C_r2	SAPMNVDNLIM	11	C50H85N13O17S2	SAPMNVDNLIM	SAPMNVDNLIM	SAPMNVDNLIM	SAPMNVDNLIM	0.9679	0.998	#N/A	35.5+/-0.1	#N/A	1203.56	2	602.789	#N/A	35.51	842081	525221	316860	1123	1123	0	#N/A	0.007425	VACV			FALSE
20221007_MS_MRMhr_DC24_VACV_41C_r3.wiff	41C_r3	SAPMNVDNLIM	11	C50H85N13O17S2	SAPMNVDNLIM	SAPMNVDNLIM	SAPMNVDNLIM	SAPMNVDNLIM	0.9681	0.993	#N/A	35.5+/-0.1	#N/A	1203.56	2	602.789	#N/A	35.51	545138	344413	200725	2692	2692	0	#N/A	0.00423	VACV			FALSE
20221007_MS_MRMhr_DC24_VACV_45C_r1.wiff	45C_r1	SAPMNVDNLIM	11	C50H85N13O17S2	SAPMNVDNLIM	SAPMNVDNLIM	SAPMNVDNLIM	SAPMNVDNLIM	0.9415	0.9922	#N/A	35.5+/-0.1	#N/A	1203.56	2	602.789	#N/A	35.51	290738	191889	98848	0	0	0	#N/A	0.003034	VACV			FALSE
20221007_MS_MRMhr_DC24_VACV_45C_r2.wiff	45C_r2	SAPMNVDNLIM	11	C50H85N13O17S2	SAPMNVDNLIM	SAPMNVDNLIM	SAPMNVDNLIM	SAPMNVDNLIM	0.9677	0.9945	#N/A	35.5+/-0.1	#N/A	1203.56	2	602.789	#N/A	35.51	662127	440710	221417	2444	2444	0	#N/A	0.006485	VACV			FALSE
20221007_MS_MRMhr_DC24_VACV_45C_r3.wiff	45C_r3	SAPMNVDNLIM	11	C50H85N13O17S2	SAPMNVDNLIM	SAPMNVDNLIM	SAPMNVDNLIM	SAPMNVDNLIM	0.9231	0.9933	#N/A	35.5+/-0.1	#N/A	1203.56	2	602.789	#N/A	35.51	344489	232786	111703	1810	1810	0	#N/A	0.003123	VACV			FALSE
20221007_MS_MRMhr_DC24_VACV_49C_r1.wiff	49C_r1	SAPMNVDNLIM	11	C50H85N13O17S2	SAPMNVDNLIM	SAPMNVDNLIM	SAPMNVDNLIM	SAPMNVDNLIM	0.9638	0.9986	#N/A	35.5+/-0.1	#N/A	1203.56	2	602.789	#N/A	35.51	811287	527460	283827	7973	7973	0	#N/A	0.013468	VACV			FALSE
20221007_MS_MRMhr_DC24_VACV_49C_r2.wiff	49C_r2	SAPMNVDNLIM	11	C50H85N13O17S2	SAPMNVDNLIM	SAPMNVDNLIM	SAPMNVDNLIM	SAPMNVDNLIM	0.9384	0.9958	#N/A	35.5+/-0.1	#N/A	1203.56	2	602.789	#N/A	35.51	361020	241812	119209	235	235	0	#N/A	0.004686	VACV			FALSE
20221007_MS_MRMhr_DC24_VACV_49C_r3.wiff	49C_r3	SAPMNVDNLIM	11	C50H85N13O17S2	SAPMNVDNLIM	SAPMNVDNLIM	SAPMNVDNLIM	SAPMNVDNLIM	0.9601	0.9975	#N/A	35.5+/-0.1	#N/A	1203.56	2	602.789	#N/A	35.51	495348	325262	170086	1835	1835	0	#N/A	0.008013	VACV			FALSE
20221007_MS_MRMhr_DC24_VACV_53C_r1.wiff	53C_r1	SAPMNVDNLIM	11	C50H85N13O17S2	SAPMNVDNLIM	SAPMNVDNLIM	SAPMNVDNLIM	SAPMNVDNLIM	0.849	0.985	#N/A	35.5+/-0.1	#N/A	1203.56	2	602.789	#N/A	35.51	120915	79452	41463	916	916	0	#N/A	0.002034	VACV			FALSE
20221007_MS_MRMhr_DC24_VACV_53C_r2.wiff	53C_r2	SAPMNVDNLIM	11	C50H85N13O17S2	SAPMNVDNLIM	SAPMNVDNLIM	SAPMNVDNLIM	SAPMNVDNLIM	0.8416	0.9906	#N/A	35.5+/-0.1	#N/A	1203.56	2	602.789	#N/A	35.51	137710	93725	43986	1493	1493	0	#N/A	0.003216	VACV			FALSE
20221007_MS_MRMhr_DC24_VACV_53C_r3.wiff	53C_r3	SAPMNVDNLIM	11	C50H85N13O17S2	SAPMNVDNLIM	SAPMNVDNLIM	SAPMNVDNLIM	SAPMNVDNLIM	0.8467	0.9826	#N/A	35.5+/-0.1	#N/A	1203.56	2	602.789	#N/A	35.51	83412	58047	25365	288	288	0	#N/A	0.001519	VACV			FALSE
20221007_MS_MRMhr_DC24_VACV_57C_r1.wiff	57C_r1	SAPMNVDNLIM	11	C50H85N13O17S2	SAPMNVDNLIM	SAPMNVDNLIM	SAPMNVDNLIM	SAPMNVDNLIM	0.9135	0.9805	#N/A	35.5+/-0.1	#N/A	1203.56	2	602.789	#N/A	35.51	214246	138618	75629	3203	3203	0	#N/A	0.00648	VACV			FALSE
20221007_MS_MRMhr_DC24_VACV_57C_r2.wiff	57C_r2	SAPMNVDNLIM	11	C50H85N13O17S2	SAPMNVDNLIM	SAPMNVDNLIM	SAPMNVDNLIM	SAPMNVDNLIM	0.5728	0.934	#N/A	35.5+/-0.1	#N/A	1203.56	2	602.789	#N/A	35.51	33175	26668	6507	2217	2217	0	#N/A	0.001072	VACV			FALSE
20221007_MS_MRMhr_DC24_VACV_57C_r3.wiff	57C_r3	SAPMNVDNLIM	11	C50H85N13O17S2	SAPMNVDNLIM	SAPMNVDNLIM	SAPMNVDNLIM	SAPMNVDNLIM	0.8203	0.9607	#N/A	35.5+/-0.1	#N/A	1203.56	2	602.789	#N/A	35.51	99946	72663	27284	2407	2407	0	#N/A	0.003786	VACV			FALSE
20221007_MS_MRMhr_DC24_VACV_61C_r1.wiff	61C_r1	SAPMNVDNLIM	11	C50H85N13O17S2	SAPMNVDNLIM	SAPMNVDNLIM	SAPMNVDNLIM	SAPMNVDNLIM	0.6972	0.9154	#N/A	35.5+/-0.1	#N/A	1203.56	2	602.789	#N/A	35.51	34928	28172	6756	5195	5195	0	#N/A	0.001646	VACV			FALSE
20221007_MS_MRMhr_DC24_VACV_61C_r2.wiff	61C_r2	SAPMNVDNLIM	11	C50H85N13O17S2	SAPMNVDNLIM	SAPMNVDNLIM	SAPMNVDNLIM	SAPMNVDNLIM	0.5069	0.9001	#N/A	35.5+/-0.1	#N/A	1203.56	2	602.789	#N/A	35.51	13339	12175	1164	2429	2429	0	#N/A	0.000639	VACV			FALSE
20221007_MS_MRMhr_DC24_VACV_61C_r3.wiff	61C_r3	SAPMNVDNLIM	11	C50H85N13O17S2	SAPMNVDNLIM	SAPMNVDNLIM	SAPMNVDNLIM	SAPMNVDNLIM	0.7603	0.9217	#N/A	35.5+/-0.1	#N/A	1203.56	2	602.789	#N/A	35.51	40517	33820	6697	3503	3503	0	#N/A	0.001739	VACV			FALSE
20221007_MS_MRMhr_DC24_VACV_65C_r1.wiff	65C_r1	SAPMNVDNLIM	11	C50H85N13O17S2	SAPMNVDNLIM	SAPMNVDNLIM	SAPMNVDNLIM	SAPMNVDNLIM	0	0.811	#N/A	35.5+/-0.1	#N/A	1203.56	2	602.789	#N/A	35.51	11476	11476	0	0	0	0	#N/A	âˆž	VACV			FALSE
20221007_MS_MRMhr_DC24_VACV_65C_r2.wiff	65C_r2	SAPMNVDNLIM	11	C50H85N13O17S2	SAPMNVDNLIM	SAPMNVDNLIM	SAPMNVDNLIM	SAPMNVDNLIM	0	0.846	#N/A	35.5+/-0.1	#N/A	1203.56	2	602.789	#N/A	35.51	7309	7309	0	230	230	0	#N/A	âˆž	VACV			FALSE
20221007_MS_MRMhr_DC24_VACV_69C_r1.wiff	69C_r1	SAPMNVDNLIM	11	C50H85N13O17S2	SAPMNVDNLIM	SAPMNVDNLIM	SAPMNVDNLIM	SAPMNVDNLIM	0	0.9083	#N/A	35.5+/-0.1	#N/A	1203.56	2	602.789	#N/A	35.51	13053	13053	0	0	0	0	#N/A	âˆž	VACV			FALSE
20221007_MS_MRMhr_DC24_VACV_69C_r2.wiff	69C_r2	SAPMNVDNLIM	11	C50H85N13O17S2	SAPMNVDNLIM	SAPMNVDNLIM	SAPMNVDNLIM	SAPMNVDNLIM	0	0.8781	#N/A	35.5+/-0.1	#N/A	1203.56	2	602.789	#N/A	35.51	18359	18359	0	0	0	0	#N/A	âˆž	VACV			FALSE
20221007_MS_MRMhr_DC24_VACV_69C_r3.wiff	69C_r3	SAPMNVDNLIM	11	C50H85N13O17S2	SAPMNVDNLIM	SAPMNVDNLIM	SAPMNVDNLIM	SAPMNVDNLIM	0	0.951	#N/A	35.5+/-0.1	#N/A	1203.56	2	602.789	#N/A	35.51	11350	11350	0	2313	2313	0	#N/A	âˆž	VACV			FALSE
20221007_MS_MRMhr_DC24_VACV_73C_r1.wiff	73C_r1	SAPMNVDNLIM	11	C50H85N13O17S2	SAPMNVDNLIM	SAPMNVDNLIM	SAPMNVDNLIM	SAPMNVDNLIM	0.5194	0.917	#N/A	35.5+/-0.1	#N/A	1203.56	2	602.789	#N/A	35.51	9351	9193	158	2893	2893	0	#N/A	âˆž	VACV			FALSE
20221007_MS_MRMhr_DC24_VACV_73C_r2.wiff	73C_r2	SAPMNVDNLIM	11	C50H85N13O17S2	SAPMNVDNLIM	SAPMNVDNLIM	SAPMNVDNLIM	SAPMNVDNLIM	0.5194	0.9338	#N/A	35.5+/-0.1	#N/A	1203.56	2	602.789	#N/A	35.51	22598	22231	367	528	528	0	#N/A	âˆž	VACV			FALSE
20221007_MS_MRMhr_DC24_VACV_73C_r3.wiff	73C_r3	SAPMNVDNLIM	11	C50H85N13O17S2	SAPMNVDNLIM	SAPMNVDNLIM	SAPMNVDNLIM	SAPMNVDNLIM	0.1945	0.8979	#N/A	35.5+/-0.1	#N/A	1203.56	2	602.789	#N/A	35.51	23949	23217	732	913	913	0	#N/A	âˆž	VACV			FALSE
20221010_MS_zenoSWATH_DC24_VACV_37C_r1.wiff	SWATH_r1	SAPMNVDNLIM	11	C50H85N13O18S2	SAPM[+16]NVDNLIM	SAPM(unimod:35)NVDNLIM	SAPM[Oxi]NVDNLIM	SAPM[Oxidation (M)]NVDNLIM	0.9585	0.9819	#N/A	29.85+/-0.12	#N/A	1219.56	2	610.786	#N/A	29.91	249935	98273	151662	1236	1236	0	#N/A	0.001821	VACV			FALSE
20221010_MS_zenoSWATH_DC24_VACV_37C_r2.wiff	SWATH_r2	SAPMNVDNLIM	11	C50H85N13O18S2	SAPM[+16]NVDNLIM	SAPM(unimod:35)NVDNLIM	SAPM[Oxi]NVDNLIM	SAPM[Oxidation (M)]NVDNLIM	0.9716	0.9978	#N/A	29.85+/-0.12	#N/A	1219.56	2	610.786	#N/A	29.91	817654	342249	475405	11918	8521	3397	#N/A	0.008472	VACV			FALSE
20221010_MS_zenoSWATH_DC24_VACV_37C_r3.wiff	SWATH_r3	SAPMNVDNLIM	11	C50H85N13O18S2	SAPM[+16]NVDNLIM	SAPM(unimod:35)NVDNLIM	SAPM[Oxi]NVDNLIM	SAPM[Oxidation (M)]NVDNLIM	0.9676	0.9927	#N/A	29.85+/-0.12	#N/A	1219.56	2	610.786	#N/A	29.91	260374	98623	161752	2403	2403	0	#N/A	0.002281	VACV			FALSE
20221007_MS_MRMhr_DC24_VACV_37C_r1.wiff	37C_r1	SAPMNVDNLIM	11	C50H85N13O18S2	SAPM[+16]NVDNLIM	SAPM(unimod:35)NVDNLIM	SAPM[Oxi]NVDNLIM	SAPM[Oxidation (M)]NVDNLIM	0	0.989	#N/A	29.85+/-0.12	#N/A	1219.56	2	610.786	#N/A	29.91	258808	258808	#N/A	14677	14677	#N/A	#N/A	0.002185	VACV			FALSE
20221007_MS_MRMhr_DC24_VACV_37C_r2.wiff	37C_r2	SAPMNVDNLIM	11	C50H85N13O18S2	SAPM[+16]NVDNLIM	SAPM(unimod:35)NVDNLIM	SAPM[Oxi]NVDNLIM	SAPM[Oxidation (M)]NVDNLIM	0	0.995	#N/A	29.85+/-0.12	#N/A	1219.56	2	610.786	#N/A	29.91	896082	896082	#N/A	14267	14267	#N/A	#N/A	0.007484	VACV			FALSE
20221007_MS_MRMhr_DC24_VACV_37C_r3.wiff	37C_r3	SAPMNVDNLIM	11	C50H85N13O18S2	SAPM[+16]NVDNLIM	SAPM(unimod:35)NVDNLIM	SAPM[Oxi]NVDNLIM	SAPM[Oxidation (M)]NVDNLIM	0	0.9946	#N/A	29.85+/-0.12	#N/A	1219.56	2	610.786	#N/A	29.91	258258	258258	#N/A	0	0	#N/A	#N/A	0.002589	VACV			FALSE
20221007_MS_MRMhr_DC24_VACV_41C_r1.wiff	41C_r1	SAPMNVDNLIM	11	C50H85N13O18S2	SAPM[+16]NVDNLIM	SAPM(unimod:35)NVDNLIM	SAPM[Oxi]NVDNLIM	SAPM[Oxidation (M)]NVDNLIM	0	0.9987	#N/A	29.85+/-0.12	#N/A	1219.56	2	610.786	#N/A	29.91	699060	699060	#N/A	13401	13401	#N/A	#N/A	0.009851	VACV			FALSE
20221007_MS_MRMhr_DC24_VACV_41C_r2.wiff	41C_r2	SAPMNVDNLIM	11	C50H85N13O18S2	SAPM[+16]NVDNLIM	SAPM(unimod:35)NVDNLIM	SAPM[Oxi]NVDNLIM	SAPM[Oxidation (M)]NVDNLIM	0	0.9952	#N/A	29.85+/-0.12	#N/A	1219.56	2	610.786	#N/A	29.91	917972	917972	#N/A	24964	24964	#N/A	#N/A	0.008094	VACV			FALSE
20221007_MS_MRMhr_DC24_VACV_41C_r3.wiff	41C_r3	SAPMNVDNLIM	11	C50H85N13O18S2	SAPM[+16]NVDNLIM	SAPM(unimod:35)NVDNLIM	SAPM[Oxi]NVDNLIM	SAPM[Oxidation (M)]NVDNLIM	0	0.9982	#N/A	29.85+/-0.12	#N/A	1219.56	2	610.786	#N/A	29.91	825842	825842	#N/A	26640	26640	#N/A	#N/A	0.006409	VACV			FALSE
20221007_MS_MRMhr_DC24_VACV_45C_r1.wiff	45C_r1	SAPMNVDNLIM	11	C50H85N13O18S2	SAPM[+16]NVDNLIM	SAPM(unimod:35)NVDNLIM	SAPM[Oxi]NVDNLIM	SAPM[Oxidation (M)]NVDNLIM	0	0.995	#N/A	29.85+/-0.12	#N/A	1219.56	2	610.786	#N/A	29.91	486476	486476	#N/A	4951	4951	#N/A	#N/A	0.005077	VACV			FALSE
20221007_MS_MRMhr_DC24_VACV_45C_r2.wiff	45C_r2	SAPMNVDNLIM	11	C50H85N13O18S2	SAPM[+16]NVDNLIM	SAPM(unimod:35)NVDNLIM	SAPM[Oxi]NVDNLIM	SAPM[Oxidation (M)]NVDNLIM	0	0.9967	#N/A	29.85+/-0.12	#N/A	1219.56	2	610.786	#N/A	29.91	771095	771095	#N/A	13630	13630	#N/A	#N/A	0.007553	VACV			FALSE
20221007_MS_MRMhr_DC24_VACV_45C_r3.wiff	45C_r3	SAPMNVDNLIM	11	C50H85N13O18S2	SAPM[+16]NVDNLIM	SAPM(unimod:35)NVDNLIM	SAPM[Oxi]NVDNLIM	SAPM[Oxidation (M)]NVDNLIM	0	0.9984	#N/A	29.85+/-0.12	#N/A	1219.56	2	610.786	#N/A	29.91	626583	626583	#N/A	12025	12025	#N/A	#N/A	0.00568	VACV			FALSE
20221007_MS_MRMhr_DC24_VACV_49C_r1.wiff	49C_r1	SAPMNVDNLIM	11	C50H85N13O18S2	SAPM[+16]NVDNLIM	SAPM(unimod:35)NVDNLIM	SAPM[Oxi]NVDNLIM	SAPM[Oxidation (M)]NVDNLIM	0	0.9973	#N/A	29.85+/-0.12	#N/A	1219.56	2	610.786	#N/A	29.91	570804	570804	#N/A	22464	22464	#N/A	#N/A	0.009476	VACV			FALSE
20221007_MS_MRMhr_DC24_VACV_49C_r2.wiff	49C_r2	SAPMNVDNLIM	11	C50H85N13O18S2	SAPM[+16]NVDNLIM	SAPM(unimod:35)NVDNLIM	SAPM[Oxi]NVDNLIM	SAPM[Oxidation (M)]NVDNLIM	0	0.9954	#N/A	29.85+/-0.12	#N/A	1219.56	2	610.786	#N/A	29.91	454973	454973	#N/A	5570	5570	#N/A	#N/A	0.005905	VACV			FALSE
20221007_MS_MRMhr_DC24_VACV_49C_r3.wiff	49C_r3	SAPMNVDNLIM	11	C50H85N13O18S2	SAPM[+16]NVDNLIM	SAPM(unimod:35)NVDNLIM	SAPM[Oxi]NVDNLIM	SAPM[Oxidation (M)]NVDNLIM	0	0.9933	#N/A	29.85+/-0.12	#N/A	1219.56	2	610.786	#N/A	29.91	471269	471269	#N/A	5026	5026	#N/A	#N/A	0.007623	VACV			FALSE
20221007_MS_MRMhr_DC24_VACV_53C_r1.wiff	53C_r1	SAPMNVDNLIM	11	C50H85N13O18S2	SAPM[+16]NVDNLIM	SAPM(unimod:35)NVDNLIM	SAPM[Oxi]NVDNLIM	SAPM[Oxidation (M)]NVDNLIM	0	0.9975	#N/A	29.85+/-0.12	#N/A	1219.56	2	610.786	#N/A	29.91	143651	143651	#N/A	1167	1167	#N/A	#N/A	0.002416	VACV			FALSE
20221007_MS_MRMhr_DC24_VACV_53C_r2.wiff	53C_r2	SAPMNVDNLIM	11	C50H85N13O18S2	SAPM[+16]NVDNLIM	SAPM(unimod:35)NVDNLIM	SAPM[Oxi]NVDNLIM	SAPM[Oxidation (M)]NVDNLIM	0	0.9968	#N/A	29.85+/-0.12	#N/A	1219.56	2	610.786	#N/A	29.91	231654	231654	#N/A	7002	7002	#N/A	#N/A	0.00541	VACV			FALSE
20221007_MS_MRMhr_DC24_VACV_53C_r3.wiff	53C_r3	SAPMNVDNLIM	11	C50H85N13O18S2	SAPM[+16]NVDNLIM	SAPM(unimod:35)NVDNLIM	SAPM[Oxi]NVDNLIM	SAPM[Oxidation (M)]NVDNLIM	0	0.9967	#N/A	29.85+/-0.12	#N/A	1219.56	2	610.786	#N/A	29.91	173107	173107	#N/A	1411	1411	#N/A	#N/A	0.003152	VACV			FALSE
20221007_MS_MRMhr_DC24_VACV_57C_r1.wiff	57C_r1	SAPMNVDNLIM	11	C50H85N13O18S2	SAPM[+16]NVDNLIM	SAPM(unimod:35)NVDNLIM	SAPM[Oxi]NVDNLIM	SAPM[Oxidation (M)]NVDNLIM	0	0.9656	#N/A	29.85+/-0.12	#N/A	1219.56	2	610.786	#N/A	29.91	71355	71355	#N/A	4093	4093	#N/A	#N/A	0.002158	VACV			FALSE
20221007_MS_MRMhr_DC24_VACV_57C_r2.wiff	57C_r2	SAPMNVDNLIM	11	C50H85N13O18S2	SAPM[+16]NVDNLIM	SAPM(unimod:35)NVDNLIM	SAPM[Oxi]NVDNLIM	SAPM[Oxidation (M)]NVDNLIM	0	0.9605	#N/A	29.85+/-0.12	#N/A	1219.56	2	610.786	#N/A	29.91	54955	54955	#N/A	0	0	#N/A	#N/A	0.001776	VACV			FALSE
20221007_MS_MRMhr_DC24_VACV_57C_r3.wiff	57C_r3	SAPMNVDNLIM	11	C50H85N13O18S2	SAPM[+16]NVDNLIM	SAPM(unimod:35)NVDNLIM	SAPM[Oxi]NVDNLIM	SAPM[Oxidation (M)]NVDNLIM	0	0.9616	#N/A	29.85+/-0.12	#N/A	1219.56	2	610.786	#N/A	29.91	48895	48895	#N/A	3782	3782	#N/A	#N/A	0.001852	VACV			FALSE
20221007_MS_MRMhr_DC24_VACV_61C_r1.wiff	61C_r1	SAPMNVDNLIM	11	C50H85N13O18S2	SAPM[+16]NVDNLIM	SAPM(unimod:35)NVDNLIM	SAPM[Oxi]NVDNLIM	SAPM[Oxidation (M)]NVDNLIM	0	0.8667	#N/A	29.85+/-0.12	#N/A	1219.56	2	610.786	#N/A	29.91	26794	26794	#N/A	0	0	#N/A	#N/A	0.001263	VACV			FALSE
20221007_MS_MRMhr_DC24_VACV_61C_r2.wiff	61C_r2	SAPMNVDNLIM	11	C50H85N13O18S2	SAPM[+16]NVDNLIM	SAPM(unimod:35)NVDNLIM	SAPM[Oxi]NVDNLIM	SAPM[Oxidation (M)]NVDNLIM	0	0.9435	#N/A	29.85+/-0.12	#N/A	1219.56	2	610.786	#N/A	29.91	14177	14177	#N/A	2682	2682	#N/A	#N/A	0.00068	VACV			FALSE
20221007_MS_MRMhr_DC24_VACV_61C_r3.wiff	61C_r3	SAPMNVDNLIM	11	C50H85N13O18S2	SAPM[+16]NVDNLIM	SAPM(unimod:35)NVDNLIM	SAPM[Oxi]NVDNLIM	SAPM[Oxidation (M)]NVDNLIM	0	0.8473	#N/A	29.85+/-0.12	#N/A	1219.56	2	610.786	#N/A	29.91	22616	22616	#N/A	0	0	#N/A	#N/A	0.000971	VACV			FALSE
20221007_MS_MRMhr_DC24_VACV_65C_r1.wiff	65C_r1	SAPMNVDNLIM	11	C50H85N13O18S2	SAPM[+16]NVDNLIM	SAPM(unimod:35)NVDNLIM	SAPM[Oxi]NVDNLIM	SAPM[Oxidation (M)]NVDNLIM	0	0.9647	#N/A	29.85+/-0.12	#N/A	1219.56	2	610.786	#N/A	29.91	6701	6701	#N/A	1895	1895	#N/A	#N/A	âˆž	VACV			FALSE
20221007_MS_MRMhr_DC24_VACV_65C_r2.wiff	65C_r2	SAPMNVDNLIM	11	C50H85N13O18S2	SAPM[+16]NVDNLIM	SAPM(unimod:35)NVDNLIM	SAPM[Oxi]NVDNLIM	SAPM[Oxidation (M)]NVDNLIM	0	0.8427	#N/A	29.85+/-0.12	#N/A	1219.56	2	610.786	#N/A	29.91	3334	3334	#N/A	0	0	#N/A	#N/A	âˆž	VACV			FALSE
20221007_MS_MRMhr_DC24_VACV_69C_r1.wiff	69C_r1	SAPMNVDNLIM	11	C50H85N13O18S2	SAPM[+16]NVDNLIM	SAPM(unimod:35)NVDNLIM	SAPM[Oxi]NVDNLIM	SAPM[Oxidation (M)]NVDNLIM	0	0.8502	#N/A	29.85+/-0.12	#N/A	1219.56	2	610.786	#N/A	29.91	5537	5537	#N/A	1271	1271	#N/A	#N/A	âˆž	VACV			FALSE
20221007_MS_MRMhr_DC24_VACV_69C_r2.wiff	69C_r2	SAPMNVDNLIM	11	C50H85N13O18S2	SAPM[+16]NVDNLIM	SAPM(unimod:35)NVDNLIM	SAPM[Oxi]NVDNLIM	SAPM[Oxidation (M)]NVDNLIM	0	0.8578	#N/A	29.85+/-0.12	#N/A	1219.56	2	610.786	#N/A	29.91	6809	6809	#N/A	1339	1339	#N/A	#N/A	âˆž	VACV			FALSE
20221007_MS_MRMhr_DC24_VACV_69C_r3.wiff	69C_r3	SAPMNVDNLIM	11	C50H85N13O18S2	SAPM[+16]NVDNLIM	SAPM(unimod:35)NVDNLIM	SAPM[Oxi]NVDNLIM	SAPM[Oxidation (M)]NVDNLIM	0	0.7894	#N/A	29.85+/-0.12	#N/A	1219.56	2	610.786	#N/A	29.91	5307	5307	#N/A	2379	2379	#N/A	#N/A	âˆž	VACV			FALSE
20221007_MS_MRMhr_DC24_VACV_73C_r1.wiff	73C_r1	SAPMNVDNLIM	11	C50H85N13O18S2	SAPM[+16]NVDNLIM	SAPM(unimod:35)NVDNLIM	SAPM[Oxi]NVDNLIM	SAPM[Oxidation (M)]NVDNLIM	0	0.8284	#N/A	29.85+/-0.12	#N/A	1219.56	2	610.786	#N/A	29.91	6662	6662	#N/A	0	0	#N/A	#N/A	âˆž	VACV			FALSE
20221007_MS_MRMhr_DC24_VACV_73C_r2.wiff	73C_r2	SAPMNVDNLIM	11	C50H85N13O18S2	SAPM[+16]NVDNLIM	SAPM(unimod:35)NVDNLIM	SAPM[Oxi]NVDNLIM	SAPM[Oxidation (M)]NVDNLIM	0	0.8845	#N/A	29.85+/-0.12	#N/A	1219.56	2	610.786	#N/A	29.91	5521	5521	#N/A	0	0	#N/A	#N/A	âˆž	VACV			FALSE
20221007_MS_MRMhr_DC24_VACV_73C_r3.wiff	73C_r3	SAPMNVDNLIM	11	C50H85N13O18S2	SAPM[+16]NVDNLIM	SAPM(unimod:35)NVDNLIM	SAPM[Oxi]NVDNLIM	SAPM[Oxidation (M)]NVDNLIM	0	0.9238	#N/A	29.85+/-0.12	#N/A	1219.56	2	610.786	#N/A	29.91	7143	7143	#N/A	0	0	#N/A	#N/A	âˆž	VACV			FALSE
20221010_MS_zenoSWATH_DC24_VACV_37C_r1.wiff	SWATH_r1	SAPMNVDNLIM	11	C50H85N13O18S2	SAPMNVDNLIM[+16]	SAPMNVDNLIM(unimod:35)	SAPMNVDNLIM[Oxi]	SAPMNVDNLIM[Oxidation (M)]	0.9581	0.9896	#N/A	30.69+/-0.09	#N/A	1219.56	2	610.786	#N/A	30.74	189296	112830	76465	409	409	0	#N/A	0.001379	VACV			FALSE
20221010_MS_zenoSWATH_DC24_VACV_37C_r2.wiff	SWATH_r2	SAPMNVDNLIM	11	C50H85N13O18S2	SAPMNVDNLIM[+16]	SAPMNVDNLIM(unimod:35)	SAPMNVDNLIM[Oxi]	SAPMNVDNLIM[Oxidation (M)]	0.9699	0.9898	#N/A	30.69+/-0.09	#N/A	1219.56	2	610.786	#N/A	30.74	664904	387200	277704	11813	11813	0	#N/A	0.006889	VACV			FALSE
20221010_MS_zenoSWATH_DC24_VACV_37C_r3.wiff	SWATH_r3	SAPMNVDNLIM	11	C50H85N13O18S2	SAPMNVDNLIM[+16]	SAPMNVDNLIM(unimod:35)	SAPMNVDNLIM[Oxi]	SAPMNVDNLIM[Oxidation (M)]	0.9704	0.9902	#N/A	30.69+/-0.09	#N/A	1219.56	2	610.786	#N/A	30.74	175852	104490	71361	935	935	0	#N/A	0.001541	VACV			FALSE
20221007_MS_MRMhr_DC24_VACV_37C_r1.wiff	37C_r1	SAPMNVDNLIM	11	C50H85N13O18S2	SAPMNVDNLIM[+16]	SAPMNVDNLIM(unimod:35)	SAPMNVDNLIM[Oxi]	SAPMNVDNLIM[Oxidation (M)]	0	0.9911	#N/A	30.69+/-0.09	#N/A	1219.56	2	610.786	#N/A	30.74	256370	256370	#N/A	3668	3668	#N/A	#N/A	0.002164	VACV			FALSE
20221007_MS_MRMhr_DC24_VACV_37C_r2.wiff	37C_r2	SAPMNVDNLIM	11	C50H85N13O18S2	SAPMNVDNLIM[+16]	SAPMNVDNLIM(unimod:35)	SAPMNVDNLIM[Oxi]	SAPMNVDNLIM[Oxidation (M)]	0	0.9979	#N/A	30.69+/-0.09	#N/A	1219.56	2	610.786	#N/A	30.74	916257	916257	#N/A	25967	25967	#N/A	#N/A	0.007652	VACV			FALSE
20221007_MS_MRMhr_DC24_VACV_37C_r3.wiff	37C_r3	SAPMNVDNLIM	11	C50H85N13O18S2	SAPMNVDNLIM[+16]	SAPMNVDNLIM(unimod:35)	SAPMNVDNLIM[Oxi]	SAPMNVDNLIM[Oxidation (M)]	0	0.9878	#N/A	30.69+/-0.09	#N/A	1219.56	2	610.786	#N/A	30.74	224771	224771	#N/A	4816	4816	#N/A	#N/A	0.002254	VACV			FALSE
20221007_MS_MRMhr_DC24_VACV_41C_r1.wiff	41C_r1	SAPMNVDNLIM	11	C50H85N13O18S2	SAPMNVDNLIM[+16]	SAPMNVDNLIM(unimod:35)	SAPMNVDNLIM[Oxi]	SAPMNVDNLIM[Oxidation (M)]	0	0.9966	#N/A	30.69+/-0.09	#N/A	1219.56	2	610.786	#N/A	30.74	660380	660380	#N/A	16046	16046	#N/A	#N/A	0.009306	VACV			FALSE
20221007_MS_MRMhr_DC24_VACV_41C_r2.wiff	41C_r2	SAPMNVDNLIM	11	C50H85N13O18S2	SAPMNVDNLIM[+16]	SAPMNVDNLIM(unimod:35)	SAPMNVDNLIM[Oxi]	SAPMNVDNLIM[Oxidation (M)]	0	0.9968	#N/A	30.69+/-0.09	#N/A	1219.56	2	610.786	#N/A	30.74	854486	854486	#N/A	25685	25685	#N/A	#N/A	0.007535	VACV			FALSE
20221007_MS_MRMhr_DC24_VACV_41C_r3.wiff	41C_r3	SAPMNVDNLIM	11	C50H85N13O18S2	SAPMNVDNLIM[+16]	SAPMNVDNLIM(unimod:35)	SAPMNVDNLIM[Oxi]	SAPMNVDNLIM[Oxidation (M)]	0	0.9966	#N/A	30.69+/-0.09	#N/A	1219.56	2	610.786	#N/A	30.74	748981	748981	#N/A	20864	20864	#N/A	#N/A	0.005812	VACV			FALSE
20221007_MS_MRMhr_DC24_VACV_45C_r1.wiff	45C_r1	SAPMNVDNLIM	11	C50H85N13O18S2	SAPMNVDNLIM[+16]	SAPMNVDNLIM(unimod:35)	SAPMNVDNLIM[Oxi]	SAPMNVDNLIM[Oxidation (M)]	0	0.9913	#N/A	30.69+/-0.09	#N/A	1219.56	2	610.786	#N/A	30.74	432522	432522	#N/A	11190	11190	#N/A	#N/A	0.004514	VACV			FALSE
20221007_MS_MRMhr_DC24_VACV_45C_r2.wiff	45C_r2	SAPMNVDNLIM	11	C50H85N13O18S2	SAPMNVDNLIM[+16]	SAPMNVDNLIM(unimod:35)	SAPMNVDNLIM[Oxi]	SAPMNVDNLIM[Oxidation (M)]	0	0.9981	#N/A	30.69+/-0.09	#N/A	1219.56	2	610.786	#N/A	30.74	732577	732577	#N/A	21467	21467	#N/A	#N/A	0.007176	VACV			FALSE
20221007_MS_MRMhr_DC24_VACV_45C_r3.wiff	45C_r3	SAPMNVDNLIM	11	C50H85N13O18S2	SAPMNVDNLIM[+16]	SAPMNVDNLIM(unimod:35)	SAPMNVDNLIM[Oxi]	SAPMNVDNLIM[Oxidation (M)]	0	0.9964	#N/A	30.69+/-0.09	#N/A	1219.56	2	610.786	#N/A	30.74	603444	603444	#N/A	9420	9420	#N/A	#N/A	0.00547	VACV			FALSE
20221007_MS_MRMhr_DC24_VACV_49C_r1.wiff	49C_r1	SAPMNVDNLIM	11	C50H85N13O18S2	SAPMNVDNLIM[+16]	SAPMNVDNLIM(unimod:35)	SAPMNVDNLIM[Oxi]	SAPMNVDNLIM[Oxidation (M)]	0	0.9982	#N/A	30.69+/-0.09	#N/A	1219.56	2	610.786	#N/A	30.74	648345	648345	#N/A	20866	20866	#N/A	#N/A	0.010763	VACV			FALSE
20221007_MS_MRMhr_DC24_VACV_49C_r2.wiff	49C_r2	SAPMNVDNLIM	11	C50H85N13O18S2	SAPMNVDNLIM[+16]	SAPMNVDNLIM(unimod:35)	SAPMNVDNLIM[Oxi]	SAPMNVDNLIM[Oxidation (M)]	0	0.9983	#N/A	30.69+/-0.09	#N/A	1219.56	2	610.786	#N/A	30.74	425755	425755	#N/A	10343	10343	#N/A	#N/A	0.005526	VACV			FALSE
20221007_MS_MRMhr_DC24_VACV_49C_r3.wiff	49C_r3	SAPMNVDNLIM	11	C50H85N13O18S2	SAPMNVDNLIM[+16]	SAPMNVDNLIM(unimod:35)	SAPMNVDNLIM[Oxi]	SAPMNVDNLIM[Oxidation (M)]	0	0.995	#N/A	30.69+/-0.09	#N/A	1219.56	2	610.786	#N/A	30.74	457042	457042	#N/A	14535	14535	#N/A	#N/A	0.007393	VACV			FALSE
20221007_MS_MRMhr_DC24_VACV_53C_r1.wiff	53C_r1	SAPMNVDNLIM	11	C50H85N13O18S2	SAPMNVDNLIM[+16]	SAPMNVDNLIM(unimod:35)	SAPMNVDNLIM[Oxi]	SAPMNVDNLIM[Oxidation (M)]	0	0.9864	#N/A	30.69+/-0.09	#N/A	1219.56	2	610.786	#N/A	30.74	108567	108567	#N/A	1923	1923	#N/A	#N/A	0.001826	VACV			FALSE
20221007_MS_MRMhr_DC24_VACV_53C_r2.wiff	53C_r2	SAPMNVDNLIM	11	C50H85N13O18S2	SAPMNVDNLIM[+16]	SAPMNVDNLIM(unimod:35)	SAPMNVDNLIM[Oxi]	SAPMNVDNLIM[Oxidation (M)]	0	0.9893	#N/A	30.69+/-0.09	#N/A	1219.56	2	610.786	#N/A	30.74	215634	215634	#N/A	5296	5296	#N/A	#N/A	0.005036	VACV			FALSE
20221007_MS_MRMhr_DC24_VACV_53C_r3.wiff	53C_r3	SAPMNVDNLIM	11	C50H85N13O18S2	SAPMNVDNLIM[+16]	SAPMNVDNLIM(unimod:35)	SAPMNVDNLIM[Oxi]	SAPMNVDNLIM[Oxidation (M)]	0	0.9913	#N/A	30.69+/-0.09	#N/A	1219.56	2	610.786	#N/A	30.74	150955	150955	#N/A	3540	3540	#N/A	#N/A	0.002748	VACV			FALSE
20221007_MS_MRMhr_DC24_VACV_57C_r1.wiff	57C_r1	SAPMNVDNLIM	11	C50H85N13O18S2	SAPMNVDNLIM[+16]	SAPMNVDNLIM(unimod:35)	SAPMNVDNLIM[Oxi]	SAPMNVDNLIM[Oxidation (M)]	0	0.9536	#N/A	30.69+/-0.09	#N/A	1219.56	2	610.786	#N/A	30.74	61431	61431	#N/A	2751	2751	#N/A	#N/A	0.001858	VACV			FALSE
20221007_MS_MRMhr_DC24_VACV_57C_r2.wiff	57C_r2	SAPMNVDNLIM	11	C50H85N13O18S2	SAPMNVDNLIM[+16]	SAPMNVDNLIM(unimod:35)	SAPMNVDNLIM[Oxi]	SAPMNVDNLIM[Oxidation (M)]	0	0.9604	#N/A	30.69+/-0.09	#N/A	1219.56	2	610.786	#N/A	30.74	38802	38802	#N/A	3809	3809	#N/A	#N/A	0.001254	VACV			FALSE
20221007_MS_MRMhr_DC24_VACV_57C_r3.wiff	57C_r3	SAPMNVDNLIM	11	C50H85N13O18S2	SAPMNVDNLIM[+16]	SAPMNVDNLIM(unimod:35)	SAPMNVDNLIM[Oxi]	SAPMNVDNLIM[Oxidation (M)]	0	0.9807	#N/A	30.69+/-0.09	#N/A	1219.56	2	610.786	#N/A	30.74	57047	57047	#N/A	0	0	#N/A	#N/A	0.002161	VACV			FALSE
20221007_MS_MRMhr_DC24_VACV_61C_r1.wiff	61C_r1	SAPMNVDNLIM	11	C50H85N13O18S2	SAPMNVDNLIM[+16]	SAPMNVDNLIM(unimod:35)	SAPMNVDNLIM[Oxi]	SAPMNVDNLIM[Oxidation (M)]	0	0.9715	#N/A	30.69+/-0.09	#N/A	1219.56	2	610.786	#N/A	30.74	11769	11769	#N/A	0	0	#N/A	#N/A	0.000555	VACV			FALSE
20221007_MS_MRMhr_DC24_VACV_61C_r2.wiff	61C_r2	SAPMNVDNLIM	11	C50H85N13O18S2	SAPMNVDNLIM[+16]	SAPMNVDNLIM(unimod:35)	SAPMNVDNLIM[Oxi]	SAPMNVDNLIM[Oxidation (M)]	0	0.9474	#N/A	30.69+/-0.09	#N/A	1219.56	2	610.786	#N/A	30.74	11645	11645	#N/A	0	0	#N/A	#N/A	0.000558	VACV			FALSE
20221007_MS_MRMhr_DC24_VACV_61C_r3.wiff	61C_r3	SAPMNVDNLIM	11	C50H85N13O18S2	SAPMNVDNLIM[+16]	SAPMNVDNLIM(unimod:35)	SAPMNVDNLIM[Oxi]	SAPMNVDNLIM[Oxidation (M)]	0	0.8653	#N/A	30.69+/-0.09	#N/A	1219.56	2	610.786	#N/A	30.74	10576	10576	#N/A	4852	4852	#N/A	#N/A	0.000454	VACV			FALSE
20221007_MS_MRMhr_DC24_VACV_65C_r1.wiff	65C_r1	SAPMNVDNLIM	11	C50H85N13O18S2	SAPMNVDNLIM[+16]	SAPMNVDNLIM(unimod:35)	SAPMNVDNLIM[Oxi]	SAPMNVDNLIM[Oxidation (M)]	0	0.7785	#N/A	30.69+/-0.09	#N/A	1219.56	2	610.786	#N/A	30.74	1379	1379	#N/A	654	654	#N/A	#N/A	âˆž	VACV			FALSE
20221007_MS_MRMhr_DC24_VACV_65C_r2.wiff	65C_r2	SAPMNVDNLIM	11	C50H85N13O18S2	SAPMNVDNLIM[+16]	SAPMNVDNLIM(unimod:35)	SAPMNVDNLIM[Oxi]	SAPMNVDNLIM[Oxidation (M)]	0	0.8417	#N/A	30.69+/-0.09	#N/A	1219.56	2	610.786	#N/A	30.74	1321	1321	#N/A	189	189	#N/A	#N/A	âˆž	VACV			FALSE
20221007_MS_MRMhr_DC24_VACV_69C_r1.wiff	69C_r1	SAPMNVDNLIM	11	C50H85N13O18S2	SAPMNVDNLIM[+16]	SAPMNVDNLIM(unimod:35)	SAPMNVDNLIM[Oxi]	SAPMNVDNLIM[Oxidation (M)]	0	0.5773	#N/A	30.69+/-0.09	#N/A	1219.56	2	610.786	#N/A	30.74	990	990	#N/A	472	472	#N/A	#N/A	âˆž	VACV			FALSE
20221007_MS_MRMhr_DC24_VACV_69C_r2.wiff	69C_r2	SAPMNVDNLIM	11	C50H85N13O18S2	SAPMNVDNLIM[+16]	SAPMNVDNLIM(unimod:35)	SAPMNVDNLIM[Oxi]	SAPMNVDNLIM[Oxidation (M)]	0	0.9497	#N/A	30.69+/-0.09	#N/A	1219.56	2	610.786	#N/A	30.74	3811	3811	#N/A	0	0	#N/A	#N/A	âˆž	VACV			FALSE
20221007_MS_MRMhr_DC24_VACV_69C_r3.wiff	69C_r3	SAPMNVDNLIM	11	C50H85N13O18S2	SAPMNVDNLIM[+16]	SAPMNVDNLIM(unimod:35)	SAPMNVDNLIM[Oxi]	SAPMNVDNLIM[Oxidation (M)]	0	0.9578	#N/A	30.69+/-0.09	#N/A	1219.56	2	610.786	#N/A	30.74	2566	2566	#N/A	0	0	#N/A	#N/A	âˆž	VACV			FALSE
20221007_MS_MRMhr_DC24_VACV_73C_r1.wiff	73C_r1	SAPMNVDNLIM	11	C50H85N13O18S2	SAPMNVDNLIM[+16]	SAPMNVDNLIM(unimod:35)	SAPMNVDNLIM[Oxi]	SAPMNVDNLIM[Oxidation (M)]	0	0.8076	#N/A	30.69+/-0.09	#N/A	1219.56	2	610.786	#N/A	30.74	1401	1401	#N/A	0	0	#N/A	#N/A	âˆž	VACV			FALSE
20221007_MS_MRMhr_DC24_VACV_73C_r2.wiff	73C_r2	SAPMNVDNLIM	11	C50H85N13O18S2	SAPMNVDNLIM[+16]	SAPMNVDNLIM(unimod:35)	SAPMNVDNLIM[Oxi]	SAPMNVDNLIM[Oxidation (M)]	0	0.6902	#N/A	30.69+/-0.09	#N/A	1219.56	2	610.786	#N/A	30.74	1626	1626	#N/A	0	0	#N/A	#N/A	âˆž	VACV			FALSE
20221007_MS_MRMhr_DC24_VACV_73C_r3.wiff	73C_r3	SAPMNVDNLIM	11	C50H85N13O18S2	SAPMNVDNLIM[+16]	SAPMNVDNLIM(unimod:35)	SAPMNVDNLIM[Oxi]	SAPMNVDNLIM[Oxidation (M)]	0	0.5876	#N/A	30.69+/-0.09	#N/A	1219.56	2	610.786	#N/A	30.74	1755	1755	#N/A	0	0	#N/A	#N/A	âˆž	VACV			FALSE
20221010_MS_zenoSWATH_DC24_VACV_37C_r1.wiff	SWATH_r1	SAPMNVDNLIM	11	C50H85N13O19S2	SAPM[+16]NVDNLIM[+16]	SAPM(unimod:35)NVDNLIM(unimod:35)	SAPM[Oxi]NVDNLIM[Oxi]	SAPM[Oxidation (M)]NVDNLIM[Oxidation (M)]	0.9597	0.999	#N/A	24.79+/-0.04	#N/A	1235.55	2	618.784	#N/A	24.85	4149522	2242577	1906946	35672	16955	18717	#N/A	0.030235	VACV			FALSE
20221010_MS_zenoSWATH_DC24_VACV_37C_r2.wiff	SWATH_r2	SAPMNVDNLIM	11	C50H85N13O19S2	SAPM[+16]NVDNLIM[+16]	SAPM(unimod:35)NVDNLIM(unimod:35)	SAPM[Oxi]NVDNLIM[Oxi]	SAPM[Oxidation (M)]NVDNLIM[Oxidation (M)]	0.9506	0.9948	#N/A	24.79+/-0.04	#N/A	1235.55	2	618.784	#N/A	24.85	1105498	588206	517292	7998	4718	3280	#N/A	0.011454	VACV			FALSE
20221010_MS_zenoSWATH_DC24_VACV_37C_r3.wiff	SWATH_r3	SAPMNVDNLIM	11	C50H85N13O19S2	SAPM[+16]NVDNLIM[+16]	SAPM(unimod:35)NVDNLIM(unimod:35)	SAPM[Oxi]NVDNLIM[Oxi]	SAPM[Oxidation (M)]NVDNLIM[Oxidation (M)]	0.9579	0.9968	#N/A	24.79+/-0.04	#N/A	1235.55	2	618.784	#N/A	24.85	3294675	1719007	1575668	11798	6781	5017	#N/A	0.028863	VACV			FALSE
20221007_MS_MRMhr_DC24_VACV_37C_r1.wiff	37C_r1	SAPMNVDNLIM	11	C50H85N13O19S2	SAPM[+16]NVDNLIM[+16]	SAPM(unimod:35)NVDNLIM(unimod:35)	SAPM[Oxi]NVDNLIM[Oxi]	SAPM[Oxidation (M)]NVDNLIM[Oxidation (M)]	0	0.9994	#N/A	24.79+/-0.04	#N/A	1235.55	2	618.784	#N/A	24.85	3363810	3363810	#N/A	149434	149434	#N/A	#N/A	0.028398	VACV			FALSE
20221007_MS_MRMhr_DC24_VACV_37C_r2.wiff	37C_r2	SAPMNVDNLIM	11	C50H85N13O19S2	SAPM[+16]NVDNLIM[+16]	SAPM(unimod:35)NVDNLIM(unimod:35)	SAPM[Oxi]NVDNLIM[Oxi]	SAPM[Oxidation (M)]NVDNLIM[Oxidation (M)]	0	0.9978	#N/A	24.79+/-0.04	#N/A	1235.55	2	618.784	#N/A	24.85	1065241	1065241	#N/A	35185	35185	#N/A	#N/A	0.008896	VACV			FALSE
20221007_MS_MRMhr_DC24_VACV_37C_r3.wiff	37C_r3	SAPMNVDNLIM	11	C50H85N13O19S2	SAPM[+16]NVDNLIM[+16]	SAPM(unimod:35)NVDNLIM(unimod:35)	SAPM[Oxi]NVDNLIM[Oxi]	SAPM[Oxidation (M)]NVDNLIM[Oxidation (M)]	0	0.9976	#N/A	24.79+/-0.04	#N/A	1235.55	2	618.784	#N/A	24.85	2832470	2832470	#N/A	12356	12356	#N/A	#N/A	0.028399	VACV			FALSE
20221007_MS_MRMhr_DC24_VACV_41C_r1.wiff	41C_r1	SAPMNVDNLIM	11	C50H85N13O19S2	SAPM[+16]NVDNLIM[+16]	SAPM(unimod:35)NVDNLIM(unimod:35)	SAPM[Oxi]NVDNLIM[Oxi]	SAPM[Oxidation (M)]NVDNLIM[Oxidation (M)]	0	0.9988	#N/A	24.79+/-0.04	#N/A	1235.55	2	618.784	#N/A	24.85	2626364	2626364	#N/A	92170	92170	#N/A	#N/A	0.037012	VACV			FALSE
20221007_MS_MRMhr_DC24_VACV_41C_r2.wiff	41C_r2	SAPMNVDNLIM	11	C50H85N13O19S2	SAPM[+16]NVDNLIM[+16]	SAPM(unimod:35)NVDNLIM(unimod:35)	SAPM[Oxi]NVDNLIM[Oxi]	SAPM[Oxidation (M)]NVDNLIM[Oxidation (M)]	0	0.9989	#N/A	24.79+/-0.04	#N/A	1235.55	2	618.784	#N/A	24.85	3275905	3275905	#N/A	118822	118822	#N/A	#N/A	0.028886	VACV			FALSE
20221007_MS_MRMhr_DC24_VACV_41C_r3.wiff	41C_r3	SAPMNVDNLIM	11	C50H85N13O19S2	SAPM[+16]NVDNLIM[+16]	SAPM(unimod:35)NVDNLIM(unimod:35)	SAPM[Oxi]NVDNLIM[Oxi]	SAPM[Oxidation (M)]NVDNLIM[Oxidation (M)]	0	0.999	#N/A	24.79+/-0.04	#N/A	1235.55	2	618.784	#N/A	24.85	3787547	3787547	#N/A	115602	115602	#N/A	#N/A	0.029392	VACV			FALSE
20221007_MS_MRMhr_DC24_VACV_45C_r1.wiff	45C_r1	SAPMNVDNLIM	11	C50H85N13O19S2	SAPM[+16]NVDNLIM[+16]	SAPM(unimod:35)NVDNLIM(unimod:35)	SAPM[Oxi]NVDNLIM[Oxi]	SAPM[Oxidation (M)]NVDNLIM[Oxidation (M)]	0	0.9994	#N/A	24.79+/-0.04	#N/A	1235.55	2	618.784	#N/A	24.85	3160669	3160669	#N/A	93376	93376	#N/A	#N/A	0.032986	VACV			FALSE
20221007_MS_MRMhr_DC24_VACV_45C_r2.wiff	45C_r2	SAPMNVDNLIM	11	C50H85N13O19S2	SAPM[+16]NVDNLIM[+16]	SAPM(unimod:35)NVDNLIM(unimod:35)	SAPM[Oxi]NVDNLIM[Oxi]	SAPM[Oxidation (M)]NVDNLIM[Oxidation (M)]	0	0.9991	#N/A	24.79+/-0.04	#N/A	1235.55	2	618.784	#N/A	24.85	2701717	2701717	#N/A	56197	56197	#N/A	#N/A	0.026463	VACV			FALSE
20221007_MS_MRMhr_DC24_VACV_45C_r3.wiff	45C_r3	SAPMNVDNLIM	11	C50H85N13O19S2	SAPM[+16]NVDNLIM[+16]	SAPM(unimod:35)NVDNLIM(unimod:35)	SAPM[Oxi]NVDNLIM[Oxi]	SAPM[Oxidation (M)]NVDNLIM[Oxidation (M)]	0	0.9994	#N/A	24.79+/-0.04	#N/A	1235.55	2	618.784	#N/A	24.85	3574788	3574788	#N/A	68245	68245	#N/A	#N/A	0.032406	VACV			FALSE
20221007_MS_MRMhr_DC24_VACV_49C_r1.wiff	49C_r1	SAPMNVDNLIM	11	C50H85N13O19S2	SAPM[+16]NVDNLIM[+16]	SAPM(unimod:35)NVDNLIM(unimod:35)	SAPM[Oxi]NVDNLIM[Oxi]	SAPM[Oxidation (M)]NVDNLIM[Oxidation (M)]	0	0.9964	#N/A	24.79+/-0.04	#N/A	1235.55	2	618.784	#N/A	24.85	1036364	1036364	#N/A	27586	27586	#N/A	#N/A	0.017205	VACV			FALSE
20221007_MS_MRMhr_DC24_VACV_49C_r2.wiff	49C_r2	SAPMNVDNLIM	11	C50H85N13O19S2	SAPM[+16]NVDNLIM[+16]	SAPM(unimod:35)NVDNLIM(unimod:35)	SAPM[Oxi]NVDNLIM[Oxi]	SAPM[Oxidation (M)]NVDNLIM[Oxidation (M)]	0	0.9981	#N/A	24.79+/-0.04	#N/A	1235.55	2	618.784	#N/A	24.85	2477061	2477061	#N/A	54672	54672	#N/A	#N/A	0.032151	VACV			FALSE
20221007_MS_MRMhr_DC24_VACV_49C_r3.wiff	49C_r3	SAPMNVDNLIM	11	C50H85N13O19S2	SAPM[+16]NVDNLIM[+16]	SAPM(unimod:35)NVDNLIM(unimod:35)	SAPM[Oxi]NVDNLIM[Oxi]	SAPM[Oxidation (M)]NVDNLIM[Oxidation (M)]	0	0.9976	#N/A	24.79+/-0.04	#N/A	1235.55	2	618.784	#N/A	24.85	1938656	1938656	#N/A	36700	36700	#N/A	#N/A	0.031359	VACV			FALSE
20221007_MS_MRMhr_DC24_VACV_53C_r1.wiff	53C_r1	SAPMNVDNLIM	11	C50H85N13O19S2	SAPM[+16]NVDNLIM[+16]	SAPM(unimod:35)NVDNLIM(unimod:35)	SAPM[Oxi]NVDNLIM[Oxi]	SAPM[Oxidation (M)]NVDNLIM[Oxidation (M)]	0	0.9982	#N/A	24.79+/-0.04	#N/A	1235.55	2	618.784	#N/A	24.85	1572549	1572549	#N/A	37533	37533	#N/A	#N/A	0.026449	VACV			FALSE
20221007_MS_MRMhr_DC24_VACV_53C_r2.wiff	53C_r2	SAPMNVDNLIM	11	C50H85N13O19S2	SAPM[+16]NVDNLIM[+16]	SAPM(unimod:35)NVDNLIM(unimod:35)	SAPM[Oxi]NVDNLIM[Oxi]	SAPM[Oxidation (M)]NVDNLIM[Oxidation (M)]	0	0.9977	#N/A	24.79+/-0.04	#N/A	1235.55	2	618.784	#N/A	24.85	1737284	1737284	#N/A	38248	38248	#N/A	#N/A	0.040573	VACV			FALSE
20221007_MS_MRMhr_DC24_VACV_53C_r3.wiff	53C_r3	SAPMNVDNLIM	11	C50H85N13O19S2	SAPM[+16]NVDNLIM[+16]	SAPM(unimod:35)NVDNLIM(unimod:35)	SAPM[Oxi]NVDNLIM[Oxi]	SAPM[Oxidation (M)]NVDNLIM[Oxidation (M)]	0	0.9984	#N/A	24.79+/-0.04	#N/A	1235.55	2	618.784	#N/A	24.85	1844611	1844611	#N/A	15686	15686	#N/A	#N/A	0.033586	VACV			FALSE
20221007_MS_MRMhr_DC24_VACV_57C_r1.wiff	57C_r1	SAPMNVDNLIM	11	C50H85N13O19S2	SAPM[+16]NVDNLIM[+16]	SAPM(unimod:35)NVDNLIM(unimod:35)	SAPM[Oxi]NVDNLIM[Oxi]	SAPM[Oxidation (M)]NVDNLIM[Oxidation (M)]	0	0.9757	#N/A	24.79+/-0.04	#N/A	1235.55	2	618.784	#N/A	24.85	58126	58126	#N/A	3795	3795	#N/A	#N/A	0.001758	VACV			FALSE
20221007_MS_MRMhr_DC24_VACV_57C_r2.wiff	57C_r2	SAPMNVDNLIM	11	C50H85N13O19S2	SAPM[+16]NVDNLIM[+16]	SAPM(unimod:35)NVDNLIM(unimod:35)	SAPM[Oxi]NVDNLIM[Oxi]	SAPM[Oxidation (M)]NVDNLIM[Oxidation (M)]	0	0.9898	#N/A	24.79+/-0.04	#N/A	1235.55	2	618.784	#N/A	24.85	149549	149549	#N/A	6397	6397	#N/A	#N/A	0.004833	VACV			FALSE
20221007_MS_MRMhr_DC24_VACV_57C_r3.wiff	57C_r3	SAPMNVDNLIM	11	C50H85N13O19S2	SAPM[+16]NVDNLIM[+16]	SAPM(unimod:35)NVDNLIM(unimod:35)	SAPM[Oxi]NVDNLIM[Oxi]	SAPM[Oxidation (M)]NVDNLIM[Oxidation (M)]	0	0.98	#N/A	24.79+/-0.04	#N/A	1235.55	2	618.784	#N/A	24.85	47120	47120	#N/A	1975	1975	#N/A	#N/A	0.001785	VACV			FALSE
20221007_MS_MRMhr_DC24_VACV_61C_r1.wiff	61C_r1	SAPMNVDNLIM	11	C50H85N13O19S2	SAPM[+16]NVDNLIM[+16]	SAPM(unimod:35)NVDNLIM(unimod:35)	SAPM[Oxi]NVDNLIM[Oxi]	SAPM[Oxidation (M)]NVDNLIM[Oxidation (M)]	0	0.9301	#N/A	24.79+/-0.04	#N/A	1235.55	2	618.784	#N/A	24.85	18434	18434	#N/A	400	400	#N/A	#N/A	0.000869	VACV			FALSE
20221007_MS_MRMhr_DC24_VACV_61C_r2.wiff	61C_r2	SAPMNVDNLIM	11	C50H85N13O19S2	SAPM[+16]NVDNLIM[+16]	SAPM(unimod:35)NVDNLIM(unimod:35)	SAPM[Oxi]NVDNLIM[Oxi]	SAPM[Oxidation (M)]NVDNLIM[Oxidation (M)]	0	0.9812	#N/A	24.79+/-0.04	#N/A	1235.55	2	618.784	#N/A	24.85	23508	23508	#N/A	1130	1130	#N/A	#N/A	0.001127	VACV			FALSE
20221007_MS_MRMhr_DC24_VACV_61C_r3.wiff	61C_r3	SAPMNVDNLIM	11	C50H85N13O19S2	SAPM[+16]NVDNLIM[+16]	SAPM(unimod:35)NVDNLIM(unimod:35)	SAPM[Oxi]NVDNLIM[Oxi]	SAPM[Oxidation (M)]NVDNLIM[Oxidation (M)]	0	0.9384	#N/A	24.79+/-0.04	#N/A	1235.55	2	618.784	#N/A	24.85	11225	11225	#N/A	272	272	#N/A	#N/A	0.000482	VACV			FALSE
20221007_MS_MRMhr_DC24_VACV_65C_r1.wiff	65C_r1	SAPMNVDNLIM	11	C50H85N13O19S2	SAPM[+16]NVDNLIM[+16]	SAPM(unimod:35)NVDNLIM(unimod:35)	SAPM[Oxi]NVDNLIM[Oxi]	SAPM[Oxidation (M)]NVDNLIM[Oxidation (M)]	0	0.8233	#N/A	24.79+/-0.04	#N/A	1235.55	2	618.784	#N/A	24.85	6564	6564	#N/A	1585	1585	#N/A	#N/A	âˆž	VACV			FALSE
20221007_MS_MRMhr_DC24_VACV_65C_r2.wiff	65C_r2	SAPMNVDNLIM	11	C50H85N13O19S2	SAPM[+16]NVDNLIM[+16]	SAPM(unimod:35)NVDNLIM(unimod:35)	SAPM[Oxi]NVDNLIM[Oxi]	SAPM[Oxidation (M)]NVDNLIM[Oxidation (M)]	0	0.8716	#N/A	24.79+/-0.04	#N/A	1235.55	2	618.784	#N/A	24.85	5178	5178	#N/A	0	0	#N/A	#N/A	âˆž	VACV			FALSE
20221007_MS_MRMhr_DC24_VACV_69C_r1.wiff	69C_r1	SAPMNVDNLIM	11	C50H85N13O19S2	SAPM[+16]NVDNLIM[+16]	SAPM(unimod:35)NVDNLIM(unimod:35)	SAPM[Oxi]NVDNLIM[Oxi]	SAPM[Oxidation (M)]NVDNLIM[Oxidation (M)]	0	0.8743	#N/A	24.79+/-0.04	#N/A	1235.55	2	618.784	#N/A	24.85	3362	3362	#N/A	802	802	#N/A	#N/A	âˆž	VACV			FALSE
20221007_MS_MRMhr_DC24_VACV_69C_r2.wiff	69C_r2	SAPMNVDNLIM	11	C50H85N13O19S2	SAPM[+16]NVDNLIM[+16]	SAPM(unimod:35)NVDNLIM(unimod:35)	SAPM[Oxi]NVDNLIM[Oxi]	SAPM[Oxidation (M)]NVDNLIM[Oxidation (M)]	0	0.8574	#N/A	24.79+/-0.04	#N/A	1235.55	2	618.784	#N/A	24.85	4489	4489	#N/A	842	842	#N/A	#N/A	âˆž	VACV			FALSE
20221007_MS_MRMhr_DC24_VACV_69C_r3.wiff	69C_r3	SAPMNVDNLIM	11	C50H85N13O19S2	SAPM[+16]NVDNLIM[+16]	SAPM(unimod:35)NVDNLIM(unimod:35)	SAPM[Oxi]NVDNLIM[Oxi]	SAPM[Oxidation (M)]NVDNLIM[Oxidation (M)]	0	0.941	#N/A	24.79+/-0.04	#N/A	1235.55	2	618.784	#N/A	24.85	8657	8657	#N/A	0	0	#N/A	#N/A	âˆž	VACV			FALSE
20221007_MS_MRMhr_DC24_VACV_73C_r1.wiff	73C_r1	SAPMNVDNLIM	11	C50H85N13O19S2	SAPM[+16]NVDNLIM[+16]	SAPM(unimod:35)NVDNLIM(unimod:35)	SAPM[Oxi]NVDNLIM[Oxi]	SAPM[Oxidation (M)]NVDNLIM[Oxidation (M)]	0	0.9308	#N/A	24.79+/-0.04	#N/A	1235.55	2	618.784	#N/A	24.85	2039	2039	#N/A	0	0	#N/A	#N/A	âˆž	VACV			FALSE
20221007_MS_MRMhr_DC24_VACV_73C_r2.wiff	73C_r2	SAPMNVDNLIM	11	C50H85N13O19S2	SAPM[+16]NVDNLIM[+16]	SAPM(unimod:35)NVDNLIM(unimod:35)	SAPM[Oxi]NVDNLIM[Oxi]	SAPM[Oxidation (M)]NVDNLIM[Oxidation (M)]	0	0.7948	#N/A	24.79+/-0.04	#N/A	1235.55	2	618.784	#N/A	24.85	3421	3421	#N/A	0	0	#N/A	#N/A	âˆž	VACV			FALSE
20221007_MS_MRMhr_DC24_VACV_73C_r3.wiff	73C_r3	SAPMNVDNLIM	11	C50H85N13O19S2	SAPM[+16]NVDNLIM[+16]	SAPM(unimod:35)NVDNLIM(unimod:35)	SAPM[Oxi]NVDNLIM[Oxi]	SAPM[Oxidation (M)]NVDNLIM[Oxidation (M)]	0	0.6425	#N/A	24.79+/-0.04	#N/A	1235.55	2	618.784	#N/A	24.85	950	950	#N/A	1353	1353	#N/A	#N/A	âˆž	VACV			FALSE
20221010_MS_zenoSWATH_DC24_VACV_37C_r1.wiff	SWATH_r1	SAPMNVDNLIM	11	C50H85N13O19S2	SAPM[+16]NVDNLIM[+16]	SAPM(unimod:35)NVDNLIM(unimod:35)	SAPM[Oxi]NVDNLIM[Oxi]	SAPM[Oxidation (M)]NVDNLIM[Oxidation (M)]	0.805	0.9516	#N/A	24.81+/-0.08	#N/A	1235.55	3	412.858	#N/A	24.85	83462	19703	63760	0	0	0	#N/A	0.000608	VACV			FALSE
20221010_MS_zenoSWATH_DC24_VACV_37C_r2.wiff	SWATH_r2	SAPMNVDNLIM	11	C50H85N13O19S2	SAPM[+16]NVDNLIM[+16]	SAPM(unimod:35)NVDNLIM(unimod:35)	SAPM[Oxi]NVDNLIM[Oxi]	SAPM[Oxidation (M)]NVDNLIM[Oxidation (M)]	0.7604	0.9484	#N/A	24.81+/-0.08	#N/A	1235.55	3	412.858	#N/A	24.85	21158	4570	16588	0	0	0	#N/A	0.000219	VACV			FALSE
20221010_MS_zenoSWATH_DC24_VACV_37C_r3.wiff	SWATH_r3	SAPMNVDNLIM	11	C50H85N13O19S2	SAPM[+16]NVDNLIM[+16]	SAPM(unimod:35)NVDNLIM(unimod:35)	SAPM[Oxi]NVDNLIM[Oxi]	SAPM[Oxidation (M)]NVDNLIM[Oxidation (M)]	0.7954	0.9478	#N/A	24.81+/-0.08	#N/A	1235.55	3	412.858	#N/A	24.85	55759	11973	43787	0	0	0	#N/A	0.000488	VACV			FALSE
20221007_MS_MRMhr_DC24_VACV_37C_r1.wiff	37C_r1	SAPMNVDNLIM	11	C50H85N13O19S2	SAPM[+16]NVDNLIM[+16]	SAPM(unimod:35)NVDNLIM(unimod:35)	SAPM[Oxi]NVDNLIM[Oxi]	SAPM[Oxidation (M)]NVDNLIM[Oxidation (M)]	0	0.9699	#N/A	24.81+/-0.08	#N/A	1235.55	3	412.858	#N/A	24.85	32936	32936	#N/A	0	0	#N/A	#N/A	0.000278	VACV			FALSE
20221007_MS_MRMhr_DC24_VACV_37C_r2.wiff	37C_r2	SAPMNVDNLIM	11	C50H85N13O19S2	SAPM[+16]NVDNLIM[+16]	SAPM(unimod:35)NVDNLIM(unimod:35)	SAPM[Oxi]NVDNLIM[Oxi]	SAPM[Oxidation (M)]NVDNLIM[Oxidation (M)]	0	0.9148	#N/A	24.81+/-0.08	#N/A	1235.55	3	412.858	#N/A	24.85	11492	11492	#N/A	0	0	#N/A	#N/A	9.6e-05	VACV			FALSE
20221007_MS_MRMhr_DC24_VACV_37C_r3.wiff	37C_r3	SAPMNVDNLIM	11	C50H85N13O19S2	SAPM[+16]NVDNLIM[+16]	SAPM(unimod:35)NVDNLIM(unimod:35)	SAPM[Oxi]NVDNLIM[Oxi]	SAPM[Oxidation (M)]NVDNLIM[Oxidation (M)]	0	0.9633	#N/A	24.81+/-0.08	#N/A	1235.55	3	412.858	#N/A	24.85	27143	27143	#N/A	0	0	#N/A	#N/A	0.000272	VACV			FALSE
20221007_MS_MRMhr_DC24_VACV_41C_r1.wiff	41C_r1	SAPMNVDNLIM	11	C50H85N13O19S2	SAPM[+16]NVDNLIM[+16]	SAPM(unimod:35)NVDNLIM(unimod:35)	SAPM[Oxi]NVDNLIM[Oxi]	SAPM[Oxidation (M)]NVDNLIM[Oxidation (M)]	0	0.9399	#N/A	24.81+/-0.08	#N/A	1235.55	3	412.858	#N/A	24.85	24037	24037	#N/A	0	0	#N/A	#N/A	0.000339	VACV			FALSE
20221007_MS_MRMhr_DC24_VACV_41C_r2.wiff	41C_r2	SAPMNVDNLIM	11	C50H85N13O19S2	SAPM[+16]NVDNLIM[+16]	SAPM(unimod:35)NVDNLIM(unimod:35)	SAPM[Oxi]NVDNLIM[Oxi]	SAPM[Oxidation (M)]NVDNLIM[Oxidation (M)]	0	0.9757	#N/A	24.81+/-0.08	#N/A	1235.55	3	412.858	#N/A	24.85	31171	31171	#N/A	0	0	#N/A	#N/A	0.000275	VACV			FALSE
20221007_MS_MRMhr_DC24_VACV_41C_r3.wiff	41C_r3	SAPMNVDNLIM	11	C50H85N13O19S2	SAPM[+16]NVDNLIM[+16]	SAPM(unimod:35)NVDNLIM(unimod:35)	SAPM[Oxi]NVDNLIM[Oxi]	SAPM[Oxidation (M)]NVDNLIM[Oxidation (M)]	0	0.9624	#N/A	24.81+/-0.08	#N/A	1235.55	3	412.858	#N/A	24.85	37148	37148	#N/A	938	938	#N/A	#N/A	0.000288	VACV			FALSE
20221007_MS_MRMhr_DC24_VACV_45C_r1.wiff	45C_r1	SAPMNVDNLIM	11	C50H85N13O19S2	SAPM[+16]NVDNLIM[+16]	SAPM(unimod:35)NVDNLIM(unimod:35)	SAPM[Oxi]NVDNLIM[Oxi]	SAPM[Oxidation (M)]NVDNLIM[Oxidation (M)]	0	0.9601	#N/A	24.81+/-0.08	#N/A	1235.55	3	412.858	#N/A	24.85	30629	30629	#N/A	0	0	#N/A	#N/A	0.00032	VACV			FALSE
20221007_MS_MRMhr_DC24_VACV_45C_r2.wiff	45C_r2	SAPMNVDNLIM	11	C50H85N13O19S2	SAPM[+16]NVDNLIM[+16]	SAPM(unimod:35)NVDNLIM(unimod:35)	SAPM[Oxi]NVDNLIM[Oxi]	SAPM[Oxidation (M)]NVDNLIM[Oxidation (M)]	0	0.9502	#N/A	24.81+/-0.08	#N/A	1235.55	3	412.858	#N/A	24.85	27132	27132	#N/A	0	0	#N/A	#N/A	0.000266	VACV			FALSE
20221007_MS_MRMhr_DC24_VACV_45C_r3.wiff	45C_r3	SAPMNVDNLIM	11	C50H85N13O19S2	SAPM[+16]NVDNLIM[+16]	SAPM(unimod:35)NVDNLIM(unimod:35)	SAPM[Oxi]NVDNLIM[Oxi]	SAPM[Oxidation (M)]NVDNLIM[Oxidation (M)]	0	0.9745	#N/A	24.81+/-0.08	#N/A	1235.55	3	412.858	#N/A	24.85	38002	38002	#N/A	0	0	#N/A	#N/A	0.000344	VACV			FALSE
20221007_MS_MRMhr_DC24_VACV_49C_r1.wiff	49C_r1	SAPMNVDNLIM	11	C50H85N13O19S2	SAPM[+16]NVDNLIM[+16]	SAPM(unimod:35)NVDNLIM(unimod:35)	SAPM[Oxi]NVDNLIM[Oxi]	SAPM[Oxidation (M)]NVDNLIM[Oxidation (M)]	0	0.9414	#N/A	24.81+/-0.08	#N/A	1235.55	3	412.858	#N/A	24.85	9934	9934	#N/A	0	0	#N/A	#N/A	0.000165	VACV			FALSE
20221007_MS_MRMhr_DC24_VACV_49C_r2.wiff	49C_r2	SAPMNVDNLIM	11	C50H85N13O19S2	SAPM[+16]NVDNLIM[+16]	SAPM(unimod:35)NVDNLIM(unimod:35)	SAPM[Oxi]NVDNLIM[Oxi]	SAPM[Oxidation (M)]NVDNLIM[Oxidation (M)]	0	0.9633	#N/A	24.81+/-0.08	#N/A	1235.55	3	412.858	#N/A	24.85	23860	23860	#N/A	0	0	#N/A	#N/A	0.00031	VACV			FALSE
20221007_MS_MRMhr_DC24_VACV_49C_r3.wiff	49C_r3	SAPMNVDNLIM	11	C50H85N13O19S2	SAPM[+16]NVDNLIM[+16]	SAPM(unimod:35)NVDNLIM(unimod:35)	SAPM[Oxi]NVDNLIM[Oxi]	SAPM[Oxidation (M)]NVDNLIM[Oxidation (M)]	0	0.9507	#N/A	24.81+/-0.08	#N/A	1235.55	3	412.858	#N/A	24.85	18630	18630	#N/A	0	0	#N/A	#N/A	0.000301	VACV			FALSE
20221007_MS_MRMhr_DC24_VACV_53C_r1.wiff	53C_r1	SAPMNVDNLIM	11	C50H85N13O19S2	SAPM[+16]NVDNLIM[+16]	SAPM(unimod:35)NVDNLIM(unimod:35)	SAPM[Oxi]NVDNLIM[Oxi]	SAPM[Oxidation (M)]NVDNLIM[Oxidation (M)]	0	0.943	#N/A	24.81+/-0.08	#N/A	1235.55	3	412.858	#N/A	24.85	15729	15729	#N/A	0	0	#N/A	#N/A	0.000265	VACV			FALSE
20221007_MS_MRMhr_DC24_VACV_53C_r2.wiff	53C_r2	SAPMNVDNLIM	11	C50H85N13O19S2	SAPM[+16]NVDNLIM[+16]	SAPM(unimod:35)NVDNLIM(unimod:35)	SAPM[Oxi]NVDNLIM[Oxi]	SAPM[Oxidation (M)]NVDNLIM[Oxidation (M)]	0	0.9305	#N/A	24.81+/-0.08	#N/A	1235.55	3	412.858	#N/A	24.85	17168	17168	#N/A	0	0	#N/A	#N/A	0.000401	VACV			FALSE
20221007_MS_MRMhr_DC24_VACV_53C_r3.wiff	53C_r3	SAPMNVDNLIM	11	C50H85N13O19S2	SAPM[+16]NVDNLIM[+16]	SAPM(unimod:35)NVDNLIM(unimod:35)	SAPM[Oxi]NVDNLIM[Oxi]	SAPM[Oxidation (M)]NVDNLIM[Oxidation (M)]	0	0.9507	#N/A	24.81+/-0.08	#N/A	1235.55	3	412.858	#N/A	24.85	19954	19954	#N/A	0	0	#N/A	#N/A	0.000363	VACV			FALSE
20221007_MS_MRMhr_DC24_VACV_57C_r1.wiff	57C_r1	SAPMNVDNLIM	11	C50H85N13O19S2	SAPM[+16]NVDNLIM[+16]	SAPM(unimod:35)NVDNLIM(unimod:35)	SAPM[Oxi]NVDNLIM[Oxi]	SAPM[Oxidation (M)]NVDNLIM[Oxidation (M)]	0	0.7291	#N/A	24.81+/-0.08	#N/A	1235.55	3	412.858	#N/A	24.85	1234	1234	#N/A	0	0	#N/A	#N/A	3.7e-05	VACV			FALSE
20221007_MS_MRMhr_DC24_VACV_57C_r2.wiff	57C_r2	SAPMNVDNLIM	11	C50H85N13O19S2	SAPM[+16]NVDNLIM[+16]	SAPM(unimod:35)NVDNLIM(unimod:35)	SAPM[Oxi]NVDNLIM[Oxi]	SAPM[Oxidation (M)]NVDNLIM[Oxidation (M)]	0	0.7538	#N/A	24.81+/-0.08	#N/A	1235.55	3	412.858	#N/A	24.85	3284	3284	#N/A	209	209	#N/A	#N/A	0.000106	VACV			FALSE
20221007_MS_MRMhr_DC24_VACV_57C_r3.wiff	57C_r3	SAPMNVDNLIM	11	C50H85N13O19S2	SAPM[+16]NVDNLIM[+16]	SAPM(unimod:35)NVDNLIM(unimod:35)	SAPM[Oxi]NVDNLIM[Oxi]	SAPM[Oxidation (M)]NVDNLIM[Oxidation (M)]	0	0.6378	#N/A	24.81+/-0.08	#N/A	1235.55	3	412.858	#N/A	24.85	1435	1435	#N/A	425	425	#N/A	#N/A	5.4e-05	VACV			FALSE
20221007_MS_MRMhr_DC24_VACV_61C_r1.wiff	61C_r1	SAPMNVDNLIM	11	C50H85N13O19S2	SAPM[+16]NVDNLIM[+16]	SAPM(unimod:35)NVDNLIM(unimod:35)	SAPM[Oxi]NVDNLIM[Oxi]	SAPM[Oxidation (M)]NVDNLIM[Oxidation (M)]	0	0.5682	#N/A	24.81+/-0.08	#N/A	1235.55	3	412.858	#N/A	24.85	1400	1400	#N/A	0	0	#N/A	#N/A	6.6e-05	VACV			FALSE
20221007_MS_MRMhr_DC24_VACV_61C_r2.wiff	61C_r2	SAPMNVDNLIM	11	C50H85N13O19S2	SAPM[+16]NVDNLIM[+16]	SAPM(unimod:35)NVDNLIM(unimod:35)	SAPM[Oxi]NVDNLIM[Oxi]	SAPM[Oxidation (M)]NVDNLIM[Oxidation (M)]	0	0.7249	#N/A	24.81+/-0.08	#N/A	1235.55	3	412.858	#N/A	24.85	1087	1087	#N/A	0	0	#N/A	#N/A	5.2e-05	VACV			FALSE
20221007_MS_MRMhr_DC24_VACV_61C_r3.wiff	61C_r3	SAPMNVDNLIM	11	C50H85N13O19S2	SAPM[+16]NVDNLIM[+16]	SAPM(unimod:35)NVDNLIM(unimod:35)	SAPM[Oxi]NVDNLIM[Oxi]	SAPM[Oxidation (M)]NVDNLIM[Oxidation (M)]	0	0.7005	#N/A	24.81+/-0.08	#N/A	1235.55	3	412.858	#N/A	24.85	985	985	#N/A	437	437	#N/A	#N/A	4.2e-05	VACV			FALSE
20221007_MS_MRMhr_DC24_VACV_65C_r1.wiff	65C_r1	SAPMNVDNLIM	11	C50H85N13O19S2	SAPM[+16]NVDNLIM[+16]	SAPM(unimod:35)NVDNLIM(unimod:35)	SAPM[Oxi]NVDNLIM[Oxi]	SAPM[Oxidation (M)]NVDNLIM[Oxidation (M)]	0	0.611	#N/A	24.81+/-0.08	#N/A	1235.55	3	412.858	#N/A	24.85	1764	1764	#N/A	0	0	#N/A	#N/A	âˆž	VACV			FALSE
20221007_MS_MRMhr_DC24_VACV_65C_r2.wiff	65C_r2	SAPMNVDNLIM	11	C50H85N13O19S2	SAPM[+16]NVDNLIM[+16]	SAPM(unimod:35)NVDNLIM(unimod:35)	SAPM[Oxi]NVDNLIM[Oxi]	SAPM[Oxidation (M)]NVDNLIM[Oxidation (M)]	0	0.6859	#N/A	24.81+/-0.08	#N/A	1235.55	3	412.858	#N/A	24.85	313	313	#N/A	1344	1344	#N/A	#N/A	âˆž	VACV			FALSE
20221007_MS_MRMhr_DC24_VACV_69C_r1.wiff	69C_r1	SAPMNVDNLIM	11	C50H85N13O19S2	SAPM[+16]NVDNLIM[+16]	SAPM(unimod:35)NVDNLIM(unimod:35)	SAPM[Oxi]NVDNLIM[Oxi]	SAPM[Oxidation (M)]NVDNLIM[Oxidation (M)]	0	0.6444	#N/A	24.81+/-0.08	#N/A	1235.55	3	412.858	#N/A	24.85	1230	1230	#N/A	28	28	#N/A	#N/A	âˆž	VACV			FALSE
20221007_MS_MRMhr_DC24_VACV_69C_r2.wiff	69C_r2	SAPMNVDNLIM	11	C50H85N13O19S2	SAPM[+16]NVDNLIM[+16]	SAPM(unimod:35)NVDNLIM(unimod:35)	SAPM[Oxi]NVDNLIM[Oxi]	SAPM[Oxidation (M)]NVDNLIM[Oxidation (M)]	0	0.6947	#N/A	24.81+/-0.08	#N/A	1235.55	3	412.858	#N/A	24.85	367	367	#N/A	0	0	#N/A	#N/A	âˆž	VACV			FALSE
20221007_MS_MRMhr_DC24_VACV_69C_r3.wiff	69C_r3	SAPMNVDNLIM	11	C50H85N13O19S2	SAPM[+16]NVDNLIM[+16]	SAPM(unimod:35)NVDNLIM(unimod:35)	SAPM[Oxi]NVDNLIM[Oxi]	SAPM[Oxidation (M)]NVDNLIM[Oxidation (M)]	0	0.6832	#N/A	24.81+/-0.08	#N/A	1235.55	3	412.858	#N/A	24.85	1789	1789	#N/A	0	0	#N/A	#N/A	âˆž	VACV			FALSE
20221007_MS_MRMhr_DC24_VACV_73C_r1.wiff	73C_r1	SAPMNVDNLIM	11	C50H85N13O19S2	SAPM[+16]NVDNLIM[+16]	SAPM(unimod:35)NVDNLIM(unimod:35)	SAPM[Oxi]NVDNLIM[Oxi]	SAPM[Oxidation (M)]NVDNLIM[Oxidation (M)]	0	0.6818	#N/A	24.81+/-0.08	#N/A	1235.55	3	412.858	#N/A	24.85	831	831	#N/A	0	0	#N/A	#N/A	âˆž	VACV			FALSE
20221007_MS_MRMhr_DC24_VACV_73C_r2.wiff	73C_r2	SAPMNVDNLIM	11	C50H85N13O19S2	SAPM[+16]NVDNLIM[+16]	SAPM(unimod:35)NVDNLIM(unimod:35)	SAPM[Oxi]NVDNLIM[Oxi]	SAPM[Oxidation (M)]NVDNLIM[Oxidation (M)]	0	0.6637	#N/A	24.81+/-0.08	#N/A	1235.55	3	412.858	#N/A	24.85	832	832	#N/A	0	0	#N/A	#N/A	âˆž	VACV			FALSE
20221007_MS_MRMhr_DC24_VACV_73C_r3.wiff	73C_r3	SAPMNVDNLIM	11	C50H85N13O19S2	SAPM[+16]NVDNLIM[+16]	SAPM(unimod:35)NVDNLIM(unimod:35)	SAPM[Oxi]NVDNLIM[Oxi]	SAPM[Oxidation (M)]NVDNLIM[Oxidation (M)]	0	0.7601	#N/A	24.81+/-0.08	#N/A	1235.55	3	412.858	#N/A	24.85	825	825	#N/A	0	0	#N/A	#N/A	âˆž	VACV			FALSE
20221010_MS_zenoSWATH_DC24_VACV_37C_r1.wiff	SWATH_r1	YSPSNHHILL	10	C54H81N15O15	YSPSNHHILL	YSPSNHHILL	YSPSNHHILL	YSPSNHHILL	0.9251	0.9917	#N/A	18.38+/-0.1	#N/A	1179.6	2	590.809	#N/A	18.41	40815	18180	22636	0	0	0	#N/A	0.000297	VACV			FALSE
20221010_MS_zenoSWATH_DC24_VACV_37C_r2.wiff	SWATH_r2	YSPSNHHILL	10	C54H81N15O15	YSPSNHHILL	YSPSNHHILL	YSPSNHHILL	YSPSNHHILL	0.8663	0.9684	#N/A	18.38+/-0.1	#N/A	1179.6	2	590.809	#N/A	18.41	23231	9851	13380	97	97	0	#N/A	0.000241	VACV			FALSE
20221010_MS_zenoSWATH_DC24_VACV_37C_r3.wiff	SWATH_r3	YSPSNHHILL	10	C54H81N15O15	YSPSNHHILL	YSPSNHHILL	YSPSNHHILL	YSPSNHHILL	0.8758	0.988	#N/A	18.38+/-0.1	#N/A	1179.6	2	590.809	#N/A	18.41	33880	15309	18570	0	0	0	#N/A	0.000297	VACV			FALSE
20221007_MS_MRMhr_DC24_VACV_37C_r1.wiff	37C_r1	YSPSNHHILL	10	C54H81N15O15	YSPSNHHILL	YSPSNHHILL	YSPSNHHILL	YSPSNHHILL	0.6644	0.9711	#N/A	18.38+/-0.1	#N/A	1179.6	2	590.809	#N/A	18.41	40754	30612	10142	1080	1080	0	#N/A	0.000344	VACV			FALSE
20221007_MS_MRMhr_DC24_VACV_37C_r2.wiff	37C_r2	YSPSNHHILL	10	C54H81N15O15	YSPSNHHILL	YSPSNHHILL	YSPSNHHILL	YSPSNHHILL	0.7738	0.9907	#N/A	18.38+/-0.1	#N/A	1179.6	2	590.809	#N/A	18.41	36296	25377	10919	516	516	0	#N/A	0.000303	VACV			FALSE
20221007_MS_MRMhr_DC24_VACV_37C_r3.wiff	37C_r3	YSPSNHHILL	10	C54H81N15O15	YSPSNHHILL	YSPSNHHILL	YSPSNHHILL	YSPSNHHILL	0.7353	0.9815	#N/A	18.38+/-0.1	#N/A	1179.6	2	590.809	#N/A	18.41	31327	20731	10597	0	0	0	#N/A	0.000314	VACV			FALSE
20221007_MS_MRMhr_DC24_VACV_41C_r1.wiff	41C_r1	YSPSNHHILL	10	C54H81N15O15	YSPSNHHILL	YSPSNHHILL	YSPSNHHILL	YSPSNHHILL	0.6097	0.9668	#N/A	18.38+/-0.1	#N/A	1179.6	2	590.809	#N/A	18.41	19111	15027	4084	215	215	0	#N/A	0.000269	VACV			FALSE
20221007_MS_MRMhr_DC24_VACV_41C_r2.wiff	41C_r2	YSPSNHHILL	10	C54H81N15O15	YSPSNHHILL	YSPSNHHILL	YSPSNHHILL	YSPSNHHILL	0.7149	0.9791	#N/A	18.38+/-0.1	#N/A	1179.6	2	590.809	#N/A	18.41	25525	20905	4620	63	63	0	#N/A	0.000225	VACV			FALSE
20221007_MS_MRMhr_DC24_VACV_41C_r3.wiff	41C_r3	YSPSNHHILL	10	C54H81N15O15	YSPSNHHILL	YSPSNHHILL	YSPSNHHILL	YSPSNHHILL	0.832	0.9922	#N/A	18.38+/-0.1	#N/A	1179.6	2	590.809	#N/A	18.41	42964	31137	11827	743	743	0	#N/A	0.000333	VACV			FALSE
20221007_MS_MRMhr_DC24_VACV_45C_r1.wiff	45C_r1	YSPSNHHILL	10	C54H81N15O15	YSPSNHHILL	YSPSNHHILL	YSPSNHHILL	YSPSNHHILL	0.5121	0.9652	#N/A	18.38+/-0.1	#N/A	1179.6	2	590.809	#N/A	18.41	20073	12807	7266	0	0	0	#N/A	0.000209	VACV			FALSE
20221007_MS_MRMhr_DC24_VACV_45C_r2.wiff	45C_r2	YSPSNHHILL	10	C54H81N15O15	YSPSNHHILL	YSPSNHHILL	YSPSNHHILL	YSPSNHHILL	0.6005	0.9706	#N/A	18.38+/-0.1	#N/A	1179.6	2	590.809	#N/A	18.41	29330	20954	8376	179	179	0	#N/A	0.000287	VACV			FALSE
20221007_MS_MRMhr_DC24_VACV_45C_r3.wiff	45C_r3	YSPSNHHILL	10	C54H81N15O15	YSPSNHHILL	YSPSNHHILL	YSPSNHHILL	YSPSNHHILL	0.768	0.9861	#N/A	18.38+/-0.1	#N/A	1179.6	2	590.809	#N/A	18.41	32678	24994	7685	0	0	0	#N/A	0.000296	VACV			FALSE
20221007_MS_MRMhr_DC24_VACV_49C_r1.wiff	49C_r1	YSPSNHHILL	10	C54H81N15O15	YSPSNHHILL	YSPSNHHILL	YSPSNHHILL	YSPSNHHILL	0.5789	0.9545	#N/A	18.38+/-0.1	#N/A	1179.6	2	590.809	#N/A	18.41	5580	4154	1426	619	619	0	#N/A	9.3e-05	VACV			FALSE
20221007_MS_MRMhr_DC24_VACV_49C_r2.wiff	49C_r2	YSPSNHHILL	10	C54H81N15O15	YSPSNHHILL	YSPSNHHILL	YSPSNHHILL	YSPSNHHILL	0.6514	0.9681	#N/A	18.38+/-0.1	#N/A	1179.6	2	590.809	#N/A	18.41	21748	15487	6261	540	540	0	#N/A	0.000282	VACV			FALSE
20221007_MS_MRMhr_DC24_VACV_49C_r3.wiff	49C_r3	YSPSNHHILL	10	C54H81N15O15	YSPSNHHILL	YSPSNHHILL	YSPSNHHILL	YSPSNHHILL	0.6663	0.947	#N/A	18.38+/-0.1	#N/A	1179.6	2	590.809	#N/A	18.41	14154	11117	3036	584	584	0	#N/A	0.000229	VACV			FALSE
20221007_MS_MRMhr_DC24_VACV_53C_r1.wiff	53C_r1	YSPSNHHILL	10	C54H81N15O15	YSPSNHHILL	YSPSNHHILL	YSPSNHHILL	YSPSNHHILL	0.6086	0.9927	#N/A	18.38+/-0.1	#N/A	1179.6	2	590.809	#N/A	18.41	19578	13963	5615	124	124	0	#N/A	0.000329	VACV			FALSE
20221007_MS_MRMhr_DC24_VACV_53C_r2.wiff	53C_r2	YSPSNHHILL	10	C54H81N15O15	YSPSNHHILL	YSPSNHHILL	YSPSNHHILL	YSPSNHHILL	0	0.9235	#N/A	18.38+/-0.1	#N/A	1179.6	2	590.809	#N/A	18.41	2774	2774	0	798	798	0	#N/A	6.5e-05	VACV			FALSE
20221007_MS_MRMhr_DC24_VACV_53C_r3.wiff	53C_r3	YSPSNHHILL	10	C54H81N15O15	YSPSNHHILL	YSPSNHHILL	YSPSNHHILL	YSPSNHHILL	0.6105	0.921	#N/A	18.38+/-0.1	#N/A	1179.6	2	590.809	#N/A	18.41	6037	4843	1194	0	0	0	#N/A	0.00011	VACV			FALSE
20221007_MS_MRMhr_DC24_VACV_57C_r1.wiff	57C_r1	YSPSNHHILL	10	C54H81N15O15	YSPSNHHILL	YSPSNHHILL	YSPSNHHILL	YSPSNHHILL	0	0.8576	#N/A	18.38+/-0.1	#N/A	1179.6	2	590.809	#N/A	18.41	6414	6414	0	0	0	0	#N/A	0.000194	VACV			FALSE
20221007_MS_MRMhr_DC24_VACV_57C_r2.wiff	57C_r2	YSPSNHHILL	10	C54H81N15O15	YSPSNHHILL	YSPSNHHILL	YSPSNHHILL	YSPSNHHILL	0	0.8717	#N/A	18.38+/-0.1	#N/A	1179.6	2	590.809	#N/A	18.41	3815	3815	0	229	229	0	#N/A	0.000123	VACV			FALSE
20221007_MS_MRMhr_DC24_VACV_57C_r3.wiff	57C_r3	YSPSNHHILL	10	C54H81N15O15	YSPSNHHILL	YSPSNHHILL	YSPSNHHILL	YSPSNHHILL	0	0.8099	#N/A	18.38+/-0.1	#N/A	1179.6	2	590.809	#N/A	18.41	1687	1687	0	1074	1074	0	#N/A	6.4e-05	VACV			FALSE
20221007_MS_MRMhr_DC24_VACV_61C_r1.wiff	61C_r1	YSPSNHHILL	10	C54H81N15O15	YSPSNHHILL	YSPSNHHILL	YSPSNHHILL	YSPSNHHILL	0	0.8261	#N/A	18.38+/-0.1	#N/A	1179.6	2	590.809	#N/A	18.41	2928	2928	0	5509	5509	0	#N/A	0.000138	VACV			FALSE
20221007_MS_MRMhr_DC24_VACV_61C_r2.wiff	61C_r2	YSPSNHHILL	10	C54H81N15O15	YSPSNHHILL	YSPSNHHILL	YSPSNHHILL	YSPSNHHILL	0	0.7074	#N/A	18.38+/-0.1	#N/A	1179.6	2	590.809	#N/A	18.41	3949	3949	0	131	131	0	#N/A	0.000189	VACV			FALSE
20221007_MS_MRMhr_DC24_VACV_61C_r3.wiff	61C_r3	YSPSNHHILL	10	C54H81N15O15	YSPSNHHILL	YSPSNHHILL	YSPSNHHILL	YSPSNHHILL	0	0.7874	#N/A	18.38+/-0.1	#N/A	1179.6	2	590.809	#N/A	18.41	5393	5393	0	444	444	0	#N/A	0.000231	VACV			FALSE
20221007_MS_MRMhr_DC24_VACV_65C_r1.wiff	65C_r1	YSPSNHHILL	10	C54H81N15O15	YSPSNHHILL	YSPSNHHILL	YSPSNHHILL	YSPSNHHILL	0	0.6643	#N/A	18.38+/-0.1	#N/A	1179.6	2	590.809	#N/A	18.41	1180	1180	0	1061	1061	0	#N/A	âˆž	VACV			FALSE
20221007_MS_MRMhr_DC24_VACV_65C_r2.wiff	65C_r2	YSPSNHHILL	10	C54H81N15O15	YSPSNHHILL	YSPSNHHILL	YSPSNHHILL	YSPSNHHILL	0	0.786	#N/A	18.38+/-0.1	#N/A	1179.6	2	590.809	#N/A	18.41	1544	1544	0	75	75	0	#N/A	âˆž	VACV			FALSE
20221007_MS_MRMhr_DC24_VACV_69C_r1.wiff	69C_r1	YSPSNHHILL	10	C54H81N15O15	YSPSNHHILL	YSPSNHHILL	YSPSNHHILL	YSPSNHHILL	0	0.8291	#N/A	18.38+/-0.1	#N/A	1179.6	2	590.809	#N/A	18.41	1549	1549	0	537	537	0	#N/A	âˆž	VACV			FALSE
20221007_MS_MRMhr_DC24_VACV_69C_r2.wiff	69C_r2	YSPSNHHILL	10	C54H81N15O15	YSPSNHHILL	YSPSNHHILL	YSPSNHHILL	YSPSNHHILL	0	0.8627	#N/A	18.38+/-0.1	#N/A	1179.6	2	590.809	#N/A	18.41	1295	1295	0	86	86	0	#N/A	âˆž	VACV			FALSE
20221007_MS_MRMhr_DC24_VACV_69C_r3.wiff	69C_r3	YSPSNHHILL	10	C54H81N15O15	YSPSNHHILL	YSPSNHHILL	YSPSNHHILL	YSPSNHHILL	0	0.7047	#N/A	18.38+/-0.1	#N/A	1179.6	2	590.809	#N/A	18.41	443	443	0	1586	1586	0	#N/A	âˆž	VACV			FALSE
20221007_MS_MRMhr_DC24_VACV_73C_r1.wiff	73C_r1	YSPSNHHILL	10	C54H81N15O15	YSPSNHHILL	YSPSNHHILL	YSPSNHHILL	YSPSNHHILL	0	0.851	#N/A	18.38+/-0.1	#N/A	1179.6	2	590.809	#N/A	18.41	1528	1528	0	0	0	0	#N/A	âˆž	VACV			FALSE
20221007_MS_MRMhr_DC24_VACV_73C_r2.wiff	73C_r2	YSPSNHHILL	10	C54H81N15O15	YSPSNHHILL	YSPSNHHILL	YSPSNHHILL	YSPSNHHILL	0	0.7051	#N/A	18.38+/-0.1	#N/A	1179.6	2	590.809	#N/A	18.41	2491	2491	0	551	551	0	#N/A	âˆž	VACV			FALSE
20221007_MS_MRMhr_DC24_VACV_73C_r3.wiff	73C_r3	YSPSNHHILL	10	C54H81N15O15	YSPSNHHILL	YSPSNHHILL	YSPSNHHILL	YSPSNHHILL	0	0.8033	#N/A	18.38+/-0.1	#N/A	1179.6	2	590.809	#N/A	18.41	2678	2678	0	462	462	0	#N/A	âˆž	VACV			FALSE
20221010_MS_zenoSWATH_DC24_VACV_37C_r1.wiff	SWATH_r1	NNIFRTNL	8	C43H70N14O13	NNIFRTNL	NNIFRTNL	NNIFRTNL	NNIFRTNL	0.5518	0.868	#N/A	29.59+/-0.87	#N/A	990.525	2	496.27	#N/A	29.61	28710	11998	16712	454	454	0	#N/A	0.000209	VACV			FALSE
20221010_MS_zenoSWATH_DC24_VACV_37C_r2.wiff	SWATH_r2	NNIFRTNL	8	C43H70N14O13	NNIFRTNL	NNIFRTNL	NNIFRTNL	NNIFRTNL	0.4465	0.6509	#N/A	29.59+/-0.87	#N/A	990.525	2	496.27	#N/A	29.61	18391	7091	11300	629	629	0	#N/A	0.000191	VACV			FALSE
20221010_MS_zenoSWATH_DC24_VACV_37C_r3.wiff	SWATH_r3	NNIFRTNL	8	C43H70N14O13	NNIFRTNL	NNIFRTNL	NNIFRTNL	NNIFRTNL	0.441	0.9428	#N/A	29.59+/-0.87	#N/A	990.525	2	496.27	#N/A	29.61	24124	10254	13869	250	250	0	#N/A	0.000211	VACV			FALSE
20221007_MS_MRMhr_DC24_VACV_37C_r1.wiff	37C_r1	NNIFRTNL	8	C43H70N14O13	NNIFRTNL	NNIFRTNL	NNIFRTNL	NNIFRTNL	0.1293	0.9147	#N/A	29.59+/-0.87	#N/A	990.525	2	496.27	#N/A	29.61	25385	25340	46	0	0	0	#N/A	0.000214	VACV			FALSE
20221007_MS_MRMhr_DC24_VACV_37C_r2.wiff	37C_r2	NNIFRTNL	8	C43H70N14O13	NNIFRTNL	NNIFRTNL	NNIFRTNL	NNIFRTNL	0.1293	0.4656	#N/A	29.59+/-0.87	#N/A	990.525	2	496.27	#N/A	29.61	7947	7551	396	306	306	0	#N/A	6.6e-05	VACV			FALSE
20221007_MS_MRMhr_DC24_VACV_37C_r3.wiff	37C_r3	NNIFRTNL	8	C43H70N14O13	NNIFRTNL	NNIFRTNL	NNIFRTNL	NNIFRTNL	0.2256	0.9079	#N/A	29.59+/-0.87	#N/A	990.525	2	496.27	#N/A	29.61	20863	20588	275	2059	2059	0	#N/A	0.000209	VACV			FALSE
20221007_MS_MRMhr_DC24_VACV_41C_r1.wiff	41C_r1	NNIFRTNL	8	C43H70N14O13	NNIFRTNL	NNIFRTNL	NNIFRTNL	NNIFRTNL	0	0.7402	#N/A	29.59+/-0.87	#N/A	990.525	2	496.27	#N/A	29.61	10466	10466	0	0	0	0	#N/A	0.000147	VACV			FALSE
20221007_MS_MRMhr_DC24_VACV_41C_r2.wiff	41C_r2	NNIFRTNL	8	C43H70N14O13	NNIFRTNL	NNIFRTNL	NNIFRTNL	NNIFRTNL	0	0.7834	#N/A	29.59+/-0.87	#N/A	990.525	2	496.27	#N/A	29.61	20625	20625	0	116	116	0	#N/A	0.000182	VACV			FALSE
20221007_MS_MRMhr_DC24_VACV_41C_r3.wiff	41C_r3	NNIFRTNL	8	C43H70N14O13	NNIFRTNL	NNIFRTNL	NNIFRTNL	NNIFRTNL	0.1293	0.8819	#N/A	29.59+/-0.87	#N/A	990.525	2	496.27	#N/A	29.61	25508	25185	323	0	0	0	#N/A	0.000198	VACV			FALSE
20221007_MS_MRMhr_DC24_VACV_45C_r1.wiff	45C_r1	NNIFRTNL	8	C43H70N14O13	NNIFRTNL	NNIFRTNL	NNIFRTNL	NNIFRTNL	0	0.8583	#N/A	29.59+/-0.87	#N/A	990.525	2	496.27	#N/A	29.61	18245	18245	0	1244	1244	0	#N/A	0.00019	VACV			FALSE
20221007_MS_MRMhr_DC24_VACV_45C_r2.wiff	45C_r2	NNIFRTNL	8	C43H70N14O13	NNIFRTNL	NNIFRTNL	NNIFRTNL	NNIFRTNL	0.1293	0.8262	#N/A	29.59+/-0.87	#N/A	990.525	2	496.27	#N/A	29.61	19871	19666	205	1867	1867	0	#N/A	0.000195	VACV			FALSE
20221007_MS_MRMhr_DC24_VACV_45C_r3.wiff	45C_r3	NNIFRTNL	8	C43H70N14O13	NNIFRTNL	NNIFRTNL	NNIFRTNL	NNIFRTNL	0.1293	0.8547	#N/A	29.59+/-0.87	#N/A	990.525	2	496.27	#N/A	29.61	21353	21121	232	2371	2371	0	#N/A	0.000194	VACV			FALSE
20221007_MS_MRMhr_DC24_VACV_49C_r1.wiff	49C_r1	NNIFRTNL	8	C43H70N14O13	NNIFRTNL	NNIFRTNL	NNIFRTNL	NNIFRTNL	0	0.7637	#N/A	29.59+/-0.87	#N/A	990.525	2	496.27	#N/A	29.61	7496	7496	0	0	0	0	#N/A	0.000124	VACV			FALSE
20221007_MS_MRMhr_DC24_VACV_49C_r2.wiff	49C_r2	NNIFRTNL	8	C43H70N14O13	NNIFRTNL	NNIFRTNL	NNIFRTNL	NNIFRTNL	0	0.91	#N/A	29.59+/-0.87	#N/A	990.525	2	496.27	#N/A	29.61	13916	13916	0	1945	1945	0	#N/A	0.000181	VACV			FALSE
20221007_MS_MRMhr_DC24_VACV_49C_r3.wiff	49C_r3	NNIFRTNL	8	C43H70N14O13	NNIFRTNL	NNIFRTNL	NNIFRTNL	NNIFRTNL	0.1293	0.8941	#N/A	29.59+/-0.87	#N/A	990.525	2	496.27	#N/A	29.61	14639	14406	234	62	62	0	#N/A	0.000237	VACV			FALSE
20221007_MS_MRMhr_DC24_VACV_53C_r1.wiff	53C_r1	NNIFRTNL	8	C43H70N14O13	NNIFRTNL	NNIFRTNL	NNIFRTNL	NNIFRTNL	0.1293	0.935	#N/A	29.59+/-0.87	#N/A	990.525	2	496.27	#N/A	29.61	9174	9100	74	1141	1141	0	#N/A	0.000154	VACV			FALSE
20221007_MS_MRMhr_DC24_VACV_53C_r2.wiff	53C_r2	NNIFRTNL	8	C43H70N14O13	NNIFRTNL	NNIFRTNL	NNIFRTNL	NNIFRTNL	0	0.916	#N/A	29.59+/-0.87	#N/A	990.525	2	496.27	#N/A	29.61	11668	11668	0	1379	1379	0	#N/A	0.000272	VACV			FALSE
20221007_MS_MRMhr_DC24_VACV_53C_r3.wiff	53C_r3	NNIFRTNL	8	C43H70N14O13	NNIFRTNL	NNIFRTNL	NNIFRTNL	NNIFRTNL	0	0.8863	#N/A	29.59+/-0.87	#N/A	990.525	2	496.27	#N/A	29.61	10841	10841	0	939	939	0	#N/A	0.000197	VACV			FALSE
20221007_MS_MRMhr_DC24_VACV_57C_r1.wiff	57C_r1	NNIFRTNL	8	C43H70N14O13	NNIFRTNL	NNIFRTNL	NNIFRTNL	NNIFRTNL	0	0.5764	#N/A	29.59+/-0.87	#N/A	990.525	2	496.27	#N/A	29.61	7030	7030	0	1166	1166	0	#N/A	0.000213	VACV			FALSE
20221007_MS_MRMhr_DC24_VACV_57C_r2.wiff	57C_r2	NNIFRTNL	8	C43H70N14O13	NNIFRTNL	NNIFRTNL	NNIFRTNL	NNIFRTNL	0	0.7507	#N/A	29.59+/-0.87	#N/A	990.525	2	496.27	#N/A	29.61	7063	7063	0	1163	1163	0	#N/A	0.000228	VACV			FALSE
20221007_MS_MRMhr_DC24_VACV_57C_r3.wiff	57C_r3	NNIFRTNL	8	C43H70N14O13	NNIFRTNL	NNIFRTNL	NNIFRTNL	NNIFRTNL	0	0.6272	#N/A	29.59+/-0.87	#N/A	990.525	2	496.27	#N/A	29.61	4634	4634	0	3143	3143	0	#N/A	0.000176	VACV			FALSE
20221007_MS_MRMhr_DC24_VACV_61C_r1.wiff	61C_r1	NNIFRTNL	8	C43H70N14O13	NNIFRTNL	NNIFRTNL	NNIFRTNL	NNIFRTNL	0	0.5925	#N/A	29.59+/-0.87	#N/A	990.525	2	496.27	#N/A	29.61	13238	13238	0	1694	1694	0	#N/A	0.000624	VACV			FALSE
20221007_MS_MRMhr_DC24_VACV_61C_r2.wiff	61C_r2	NNIFRTNL	8	C43H70N14O13	NNIFRTNL	NNIFRTNL	NNIFRTNL	NNIFRTNL	0	0.8334	#N/A	29.59+/-0.87	#N/A	990.525	2	496.27	#N/A	29.61	8210	8210	0	7541	7541	0	#N/A	0.000394	VACV			FALSE
20221007_MS_MRMhr_DC24_VACV_61C_r3.wiff	61C_r3	NNIFRTNL	8	C43H70N14O13	NNIFRTNL	NNIFRTNL	NNIFRTNL	NNIFRTNL	0	0.5354	#N/A	29.59+/-0.87	#N/A	990.525	2	496.27	#N/A	29.61	13307	13307	0	775	775	0	#N/A	0.000571	VACV			FALSE
20221007_MS_MRMhr_DC24_VACV_65C_r1.wiff	65C_r1	NNIFRTNL	8	C43H70N14O13	NNIFRTNL	NNIFRTNL	NNIFRTNL	NNIFRTNL	0	0.7908	#N/A	29.59+/-0.87	#N/A	990.525	2	496.27	#N/A	29.61	5441	5441	0	4143	4143	0	#N/A	âˆž	VACV			FALSE
20221007_MS_MRMhr_DC24_VACV_65C_r2.wiff	65C_r2	NNIFRTNL	8	C43H70N14O13	NNIFRTNL	NNIFRTNL	NNIFRTNL	NNIFRTNL	0	0.6154	#N/A	29.59+/-0.87	#N/A	990.525	2	496.27	#N/A	29.61	4763	4763	0	3152	3152	0	#N/A	âˆž	VACV			FALSE
20221007_MS_MRMhr_DC24_VACV_69C_r1.wiff	69C_r1	NNIFRTNL	8	C43H70N14O13	NNIFRTNL	NNIFRTNL	NNIFRTNL	NNIFRTNL	0	0.5648	#N/A	29.59+/-0.87	#N/A	990.525	2	496.27	#N/A	29.61	8280	8280	0	1915	1915	0	#N/A	âˆž	VACV			FALSE
20221007_MS_MRMhr_DC24_VACV_69C_r2.wiff	69C_r2	NNIFRTNL	8	C43H70N14O13	NNIFRTNL	NNIFRTNL	NNIFRTNL	NNIFRTNL	0	0.5266	#N/A	29.59+/-0.87	#N/A	990.525	2	496.27	#N/A	29.61	4977	4977	0	3196	3196	0	#N/A	âˆž	VACV			FALSE
20221007_MS_MRMhr_DC24_VACV_69C_r3.wiff	69C_r3	NNIFRTNL	8	C43H70N14O13	NNIFRTNL	NNIFRTNL	NNIFRTNL	NNIFRTNL	0	0.4988	#N/A	29.59+/-0.87	#N/A	990.525	2	496.27	#N/A	29.61	4461	4461	0	2981	2981	0	#N/A	âˆž	VACV			FALSE
20221007_MS_MRMhr_DC24_VACV_73C_r1.wiff	73C_r1	NNIFRTNL	8	C43H70N14O13	NNIFRTNL	NNIFRTNL	NNIFRTNL	NNIFRTNL	0	0.4961	#N/A	29.59+/-0.87	#N/A	990.525	2	496.27	#N/A	29.61	2659	2659	0	952	952	0	#N/A	âˆž	VACV			FALSE
20221007_MS_MRMhr_DC24_VACV_73C_r2.wiff	73C_r2	NNIFRTNL	8	C43H70N14O13	NNIFRTNL	NNIFRTNL	NNIFRTNL	NNIFRTNL	0	0.6868	#N/A	29.59+/-0.87	#N/A	990.525	2	496.27	#N/A	29.61	2041	2041	0	3127	3127	0	#N/A	âˆž	VACV			FALSE
20221007_MS_MRMhr_DC24_VACV_73C_r3.wiff	73C_r3	NNIFRTNL	8	C43H70N14O13	NNIFRTNL	NNIFRTNL	NNIFRTNL	NNIFRTNL	0	0.7942	#N/A	29.59+/-0.87	#N/A	990.525	2	496.27	#N/A	29.61	1760	1760	0	2541	2541	0	#N/A	âˆž	VACV			FALSE
20221010_MS_zenoSWATH_DC24_VACV_37C_r1.wiff	SWATH_r1	LSYIYNML	8	C48H73N9O13S	LSYIYNML	LSYIYNML	LSYIYNML	LSYIYNML	0.9511	0.9507	#N/A	38.32+/-0.05	#N/A	1015.5	2	508.76	#N/A	38.32	42716	19486	23230	0	0	0	#N/A	0.000311	VACV			FALSE
20221010_MS_zenoSWATH_DC24_VACV_37C_r2.wiff	SWATH_r2	LSYIYNML	8	C48H73N9O13S	LSYIYNML	LSYIYNML	LSYIYNML	LSYIYNML	0.9688	0.9821	#N/A	38.32+/-0.05	#N/A	1015.5	2	508.76	#N/A	38.32	216639	81524	135115	3372	3372	0	#N/A	0.002245	VACV			FALSE
20221010_MS_zenoSWATH_DC24_VACV_37C_r3.wiff	SWATH_r3	LSYIYNML	8	C48H73N9O13S	LSYIYNML	LSYIYNML	LSYIYNML	LSYIYNML	0.9285	0.9695	#N/A	38.32+/-0.05	#N/A	1015.5	2	508.76	#N/A	38.32	54670	22332	32338	0	0	0	#N/A	0.000479	VACV			FALSE
20221007_MS_MRMhr_DC24_VACV_37C_r1.wiff	37C_r1	LSYIYNML	8	C48H73N9O13S	LSYIYNML	LSYIYNML	LSYIYNML	LSYIYNML	0.8655	0.9545	#N/A	38.32+/-0.05	#N/A	1015.5	2	508.76	#N/A	38.32	60613	38231	22382	2055	2055	0	#N/A	0.000512	VACV			FALSE
20221007_MS_MRMhr_DC24_VACV_37C_r2.wiff	37C_r2	LSYIYNML	8	C48H73N9O13S	LSYIYNML	LSYIYNML	LSYIYNML	LSYIYNML	0.9424	0.9845	#N/A	38.32+/-0.05	#N/A	1015.5	2	508.76	#N/A	38.32	465431	240376	225055	3267	3267	0	#N/A	0.003887	VACV			FALSE
20221007_MS_MRMhr_DC24_VACV_37C_r3.wiff	37C_r3	LSYIYNML	8	C48H73N9O13S	LSYIYNML	LSYIYNML	LSYIYNML	LSYIYNML	0.8527	0.9714	#N/A	38.32+/-0.05	#N/A	1015.5	2	508.76	#N/A	38.32	63519	41284	22235	0	0	0	#N/A	0.000637	VACV			FALSE
20221007_MS_MRMhr_DC24_VACV_41C_r1.wiff	41C_r1	LSYIYNML	8	C48H73N9O13S	LSYIYNML	LSYIYNML	LSYIYNML	LSYIYNML	0.8715	0.9768	#N/A	38.32+/-0.05	#N/A	1015.5	2	508.76	#N/A	38.32	135788	77988	57800	2708	2708	0	#N/A	0.001914	VACV			FALSE
20221007_MS_MRMhr_DC24_VACV_41C_r2.wiff	41C_r2	LSYIYNML	8	C48H73N9O13S	LSYIYNML	LSYIYNML	LSYIYNML	LSYIYNML	0.895	0.9759	#N/A	38.32+/-0.05	#N/A	1015.5	2	508.76	#N/A	38.32	215783	118218	97564	2635	2635	0	#N/A	0.001903	VACV			FALSE
20221007_MS_MRMhr_DC24_VACV_41C_r3.wiff	41C_r3	LSYIYNML	8	C48H73N9O13S	LSYIYNML	LSYIYNML	LSYIYNML	LSYIYNML	0.9523	0.971	#N/A	38.32+/-0.05	#N/A	1015.5	2	508.76	#N/A	38.32	198285	98471	99814	2644	2644	0	#N/A	0.001539	VACV			FALSE
20221007_MS_MRMhr_DC24_VACV_45C_r1.wiff	45C_r1	LSYIYNML	8	C48H73N9O13S	LSYIYNML	LSYIYNML	LSYIYNML	LSYIYNML	0.9111	0.9812	#N/A	38.32+/-0.05	#N/A	1015.5	2	508.76	#N/A	38.32	100905	63370	37535	2726	2726	0	#N/A	0.001053	VACV			FALSE
20221007_MS_MRMhr_DC24_VACV_45C_r2.wiff	45C_r2	LSYIYNML	8	C48H73N9O13S	LSYIYNML	LSYIYNML	LSYIYNML	LSYIYNML	0.9243	0.9722	#N/A	38.32+/-0.05	#N/A	1015.5	2	508.76	#N/A	38.32	195613	101624	93990	2997	2997	0	#N/A	0.001916	VACV			FALSE
20221007_MS_MRMhr_DC24_VACV_45C_r3.wiff	45C_r3	LSYIYNML	8	C48H73N9O13S	LSYIYNML	LSYIYNML	LSYIYNML	LSYIYNML	0.9305	0.9781	#N/A	38.32+/-0.05	#N/A	1015.5	2	508.76	#N/A	38.32	114965	73138	41828	226	226	0	#N/A	0.001042	VACV			FALSE
20221007_MS_MRMhr_DC24_VACV_49C_r1.wiff	49C_r1	LSYIYNML	8	C48H73N9O13S	LSYIYNML	LSYIYNML	LSYIYNML	LSYIYNML	0.9473	0.9786	#N/A	38.32+/-0.05	#N/A	1015.5	2	508.76	#N/A	38.32	211888	118039	93850	3714	3714	0	#N/A	0.003518	VACV			FALSE
20221007_MS_MRMhr_DC24_VACV_49C_r2.wiff	49C_r2	LSYIYNML	8	C48H73N9O13S	LSYIYNML	LSYIYNML	LSYIYNML	LSYIYNML	0.8767	0.981	#N/A	38.32+/-0.05	#N/A	1015.5	2	508.76	#N/A	38.32	103075	58363	44712	2755	2755	0	#N/A	0.001338	VACV			FALSE
20221007_MS_MRMhr_DC24_VACV_49C_r3.wiff	49C_r3	LSYIYNML	8	C48H73N9O13S	LSYIYNML	LSYIYNML	LSYIYNML	LSYIYNML	0.8417	0.9781	#N/A	38.32+/-0.05	#N/A	1015.5	2	508.76	#N/A	38.32	122514	69638	52876	854	854	0	#N/A	0.001982	VACV			FALSE
20221007_MS_MRMhr_DC24_VACV_53C_r1.wiff	53C_r1	LSYIYNML	8	C48H73N9O13S	LSYIYNML	LSYIYNML	LSYIYNML	LSYIYNML	0.8566	0.9461	#N/A	38.32+/-0.05	#N/A	1015.5	2	508.76	#N/A	38.32	37769	26544	11225	192	192	0	#N/A	0.000635	VACV			FALSE
20221007_MS_MRMhr_DC24_VACV_53C_r2.wiff	53C_r2	LSYIYNML	8	C48H73N9O13S	LSYIYNML	LSYIYNML	LSYIYNML	LSYIYNML	0.768	0.9538	#N/A	38.32+/-0.05	#N/A	1015.5	2	508.76	#N/A	38.32	41721	30814	10907	1013	1013	0	#N/A	0.000974	VACV			FALSE
20221007_MS_MRMhr_DC24_VACV_53C_r3.wiff	53C_r3	LSYIYNML	8	C48H73N9O13S	LSYIYNML	LSYIYNML	LSYIYNML	LSYIYNML	0.8484	0.9596	#N/A	38.32+/-0.05	#N/A	1015.5	2	508.76	#N/A	38.32	34610	26555	8055	943	943	0	#N/A	0.00063	VACV			FALSE
20221007_MS_MRMhr_DC24_VACV_57C_r1.wiff	57C_r1	LSYIYNML	8	C48H73N9O13S	LSYIYNML	LSYIYNML	LSYIYNML	LSYIYNML	0.9009	0.9279	#N/A	38.32+/-0.05	#N/A	1015.5	2	508.76	#N/A	38.32	31416	24677	6739	879	879	0	#N/A	0.00095	VACV			FALSE
20221007_MS_MRMhr_DC24_VACV_57C_r2.wiff	57C_r2	LSYIYNML	8	C48H73N9O13S	LSYIYNML	LSYIYNML	LSYIYNML	LSYIYNML	0.4992	0.866	#N/A	38.32+/-0.05	#N/A	1015.5	2	508.76	#N/A	38.32	11687	11000	688	0	0	0	#N/A	0.000378	VACV			FALSE
20221007_MS_MRMhr_DC24_VACV_57C_r3.wiff	57C_r3	LSYIYNML	8	C48H73N9O13S	LSYIYNML	LSYIYNML	LSYIYNML	LSYIYNML	0.7047	0.8951	#N/A	38.32+/-0.05	#N/A	1015.5	2	508.76	#N/A	38.32	19978	16600	3378	1	1	0	#N/A	0.000757	VACV			FALSE
20221007_MS_MRMhr_DC24_VACV_61C_r1.wiff	61C_r1	LSYIYNML	8	C48H73N9O13S	LSYIYNML	LSYIYNML	LSYIYNML	LSYIYNML	0.3446	0.7748	#N/A	38.32+/-0.05	#N/A	1015.5	2	508.76	#N/A	38.32	9027	8746	281	0	0	0	#N/A	0.000426	VACV			FALSE
20221007_MS_MRMhr_DC24_VACV_61C_r2.wiff	61C_r2	LSYIYNML	8	C48H73N9O13S	LSYIYNML	LSYIYNML	LSYIYNML	LSYIYNML	0	0.5488	#N/A	38.32+/-0.05	#N/A	1015.5	2	508.76	#N/A	38.32	10825	10825	0	1072	1072	0	#N/A	0.000519	VACV			FALSE
20221007_MS_MRMhr_DC24_VACV_61C_r3.wiff	61C_r3	LSYIYNML	8	C48H73N9O13S	LSYIYNML	LSYIYNML	LSYIYNML	LSYIYNML	0.4132	0.73	#N/A	38.32+/-0.05	#N/A	1015.5	2	508.76	#N/A	38.32	9762	9548	214	523	523	0	#N/A	0.000419	VACV			FALSE
20221007_MS_MRMhr_DC24_VACV_65C_r1.wiff	65C_r1	LSYIYNML	8	C48H73N9O13S	LSYIYNML	LSYIYNML	LSYIYNML	LSYIYNML	0	0.7598	#N/A	38.32+/-0.05	#N/A	1015.5	2	508.76	#N/A	38.32	19727	19727	0	0	0	0	#N/A	âˆž	VACV			FALSE
20221007_MS_MRMhr_DC24_VACV_65C_r2.wiff	65C_r2	LSYIYNML	8	C48H73N9O13S	LSYIYNML	LSYIYNML	LSYIYNML	LSYIYNML	0	0.6322	#N/A	38.32+/-0.05	#N/A	1015.5	2	508.76	#N/A	38.32	8654	8654	0	1222	1222	0	#N/A	âˆž	VACV			FALSE
20221007_MS_MRMhr_DC24_VACV_69C_r1.wiff	69C_r1	LSYIYNML	8	C48H73N9O13S	LSYIYNML	LSYIYNML	LSYIYNML	LSYIYNML	0	0.6877	#N/A	38.32+/-0.05	#N/A	1015.5	2	508.76	#N/A	38.32	16377	16377	0	3014	3014	0	#N/A	âˆž	VACV			FALSE
20221007_MS_MRMhr_DC24_VACV_69C_r2.wiff	69C_r2	LSYIYNML	8	C48H73N9O13S	LSYIYNML	LSYIYNML	LSYIYNML	LSYIYNML	0	0.5868	#N/A	38.32+/-0.05	#N/A	1015.5	2	508.76	#N/A	38.32	10749	10749	0	6019	6019	0	#N/A	âˆž	VACV			FALSE
20221007_MS_MRMhr_DC24_VACV_69C_r3.wiff	69C_r3	LSYIYNML	8	C48H73N9O13S	LSYIYNML	LSYIYNML	LSYIYNML	LSYIYNML	0	0.845	#N/A	38.32+/-0.05	#N/A	1015.5	2	508.76	#N/A	38.32	26067	26067	0	2140	2140	0	#N/A	âˆž	VACV			FALSE
20221007_MS_MRMhr_DC24_VACV_73C_r1.wiff	73C_r1	LSYIYNML	8	C48H73N9O13S	LSYIYNML	LSYIYNML	LSYIYNML	LSYIYNML	0.2437	0.8994	#N/A	38.32+/-0.05	#N/A	1015.5	2	508.76	#N/A	38.32	43310	43256	53	3749	3749	0	#N/A	âˆž	VACV			FALSE
20221007_MS_MRMhr_DC24_VACV_73C_r2.wiff	73C_r2	LSYIYNML	8	C48H73N9O13S	LSYIYNML	LSYIYNML	LSYIYNML	LSYIYNML	0	0.5813	#N/A	38.32+/-0.05	#N/A	1015.5	2	508.76	#N/A	38.32	23125	23125	0	0	0	0	#N/A	âˆž	VACV			FALSE
20221007_MS_MRMhr_DC24_VACV_73C_r3.wiff	73C_r3	LSYIYNML	8	C48H73N9O13S	LSYIYNML	LSYIYNML	LSYIYNML	LSYIYNML	0	0.6813	#N/A	38.32+/-0.05	#N/A	1015.5	2	508.76	#N/A	38.32	28909	28909	0	0	0	0	#N/A	âˆž	VACV			FALSE
20221010_MS_zenoSWATH_DC24_VACV_37C_r1.wiff	SWATH_r1	LSYIYNML	8	C48H73N9O14S	LSYIYNM[+16]L	LSYIYNM(unimod:35)L	LSYIYNM[Oxi]L	LSYIYNM[Oxidation (M)]L	0.9329	0.9825	#N/A	31.32+/-0.09	#N/A	1031.5	2	516.757	#N/A	31.38	775366	315232	460134	5674	2782	2892	#N/A	0.00565	VACV			FALSE
20221010_MS_zenoSWATH_DC24_VACV_37C_r2.wiff	SWATH_r2	LSYIYNML	8	C48H73N9O14S	LSYIYNM[+16]L	LSYIYNM(unimod:35)L	LSYIYNM[Oxi]L	LSYIYNM[Oxidation (M)]L	0.9269	0.9812	#N/A	31.32+/-0.09	#N/A	1031.5	2	516.757	#N/A	31.38	347566	145729	201837	1425	0	1425	#N/A	0.003601	VACV			FALSE
20221010_MS_zenoSWATH_DC24_VACV_37C_r3.wiff	SWATH_r3	LSYIYNML	8	C48H73N9O14S	LSYIYNM[+16]L	LSYIYNM(unimod:35)L	LSYIYNM[Oxi]L	LSYIYNM[Oxidation (M)]L	0.9316	0.9815	#N/A	31.32+/-0.09	#N/A	1031.5	2	516.757	#N/A	31.38	636183	264706	371477	975	80	895	#N/A	0.005573	VACV			FALSE
20221007_MS_MRMhr_DC24_VACV_37C_r1.wiff	37C_r1	LSYIYNML	8	C48H73N9O14S	LSYIYNM[+16]L	LSYIYNM(unimod:35)L	LSYIYNM[Oxi]L	LSYIYNM[Oxidation (M)]L	0	0.9792	#N/A	31.32+/-0.09	#N/A	1031.5	2	516.757	#N/A	31.38	522241	522241	#N/A	0	0	#N/A	#N/A	0.004409	VACV			FALSE
20221007_MS_MRMhr_DC24_VACV_37C_r2.wiff	37C_r2	LSYIYNML	8	C48H73N9O14S	LSYIYNM[+16]L	LSYIYNM(unimod:35)L	LSYIYNM[Oxi]L	LSYIYNM[Oxidation (M)]L	0	0.9729	#N/A	31.32+/-0.09	#N/A	1031.5	2	516.757	#N/A	31.38	299802	299802	#N/A	0	0	#N/A	#N/A	0.002504	VACV			FALSE
20221007_MS_MRMhr_DC24_VACV_37C_r3.wiff	37C_r3	LSYIYNML	8	C48H73N9O14S	LSYIYNM[+16]L	LSYIYNM(unimod:35)L	LSYIYNM[Oxi]L	LSYIYNM[Oxidation (M)]L	0	0.9826	#N/A	31.32+/-0.09	#N/A	1031.5	2	516.757	#N/A	31.38	470558	470558	#N/A	0	0	#N/A	#N/A	0.004718	VACV			FALSE
20221007_MS_MRMhr_DC24_VACV_41C_r1.wiff	41C_r1	LSYIYNML	8	C48H73N9O14S	LSYIYNM[+16]L	LSYIYNM(unimod:35)L	LSYIYNM[Oxi]L	LSYIYNM[Oxidation (M)]L	0	0.9763	#N/A	31.32+/-0.09	#N/A	1031.5	2	516.757	#N/A	31.38	272306	272306	#N/A	0	0	#N/A	#N/A	0.003837	VACV			FALSE
20221007_MS_MRMhr_DC24_VACV_41C_r2.wiff	41C_r2	LSYIYNML	8	C48H73N9O14S	LSYIYNM[+16]L	LSYIYNM(unimod:35)L	LSYIYNM[Oxi]L	LSYIYNM[Oxidation (M)]L	0	0.9818	#N/A	31.32+/-0.09	#N/A	1031.5	2	516.757	#N/A	31.38	423112	423112	#N/A	0	0	#N/A	#N/A	0.003731	VACV			FALSE
20221007_MS_MRMhr_DC24_VACV_41C_r3.wiff	41C_r3	LSYIYNML	8	C48H73N9O14S	LSYIYNM[+16]L	LSYIYNM(unimod:35)L	LSYIYNM[Oxi]L	LSYIYNM[Oxidation (M)]L	0	0.9806	#N/A	31.32+/-0.09	#N/A	1031.5	2	516.757	#N/A	31.38	495665	495665	#N/A	0	0	#N/A	#N/A	0.003846	VACV			FALSE
20221007_MS_MRMhr_DC24_VACV_45C_r1.wiff	45C_r1	LSYIYNML	8	C48H73N9O14S	LSYIYNM[+16]L	LSYIYNM(unimod:35)L	LSYIYNM[Oxi]L	LSYIYNM[Oxidation (M)]L	0	0.9831	#N/A	31.32+/-0.09	#N/A	1031.5	2	516.757	#N/A	31.38	388645	388645	#N/A	0	0	#N/A	#N/A	0.004056	VACV			FALSE
20221007_MS_MRMhr_DC24_VACV_45C_r2.wiff	45C_r2	LSYIYNML	8	C48H73N9O14S	LSYIYNM[+16]L	LSYIYNM(unimod:35)L	LSYIYNM[Oxi]L	LSYIYNM[Oxidation (M)]L	0	0.9764	#N/A	31.32+/-0.09	#N/A	1031.5	2	516.757	#N/A	31.38	356218	356218	#N/A	0	0	#N/A	#N/A	0.003489	VACV			FALSE
20221007_MS_MRMhr_DC24_VACV_45C_r3.wiff	45C_r3	LSYIYNML	8	C48H73N9O14S	LSYIYNM[+16]L	LSYIYNM(unimod:35)L	LSYIYNM[Oxi]L	LSYIYNM[Oxidation (M)]L	0	0.9826	#N/A	31.32+/-0.09	#N/A	1031.5	2	516.757	#N/A	31.38	412072	412072	#N/A	0	0	#N/A	#N/A	0.003735	VACV			FALSE
20221007_MS_MRMhr_DC24_VACV_49C_r1.wiff	49C_r1	LSYIYNML	8	C48H73N9O14S	LSYIYNM[+16]L	LSYIYNM(unimod:35)L	LSYIYNM[Oxi]L	LSYIYNM[Oxidation (M)]L	0	0.9785	#N/A	31.32+/-0.09	#N/A	1031.5	2	516.757	#N/A	31.38	205928	205928	#N/A	0	0	#N/A	#N/A	0.003419	VACV			FALSE
20221007_MS_MRMhr_DC24_VACV_49C_r2.wiff	49C_r2	LSYIYNML	8	C48H73N9O14S	LSYIYNM[+16]L	LSYIYNM(unimod:35)L	LSYIYNM[Oxi]L	LSYIYNM[Oxidation (M)]L	0	0.9811	#N/A	31.32+/-0.09	#N/A	1031.5	2	516.757	#N/A	31.38	286574	286574	#N/A	0	0	#N/A	#N/A	0.00372	VACV			FALSE
20221007_MS_MRMhr_DC24_VACV_49C_r3.wiff	49C_r3	LSYIYNML	8	C48H73N9O14S	LSYIYNM[+16]L	LSYIYNM(unimod:35)L	LSYIYNM[Oxi]L	LSYIYNM[Oxidation (M)]L	0	0.9794	#N/A	31.32+/-0.09	#N/A	1031.5	2	516.757	#N/A	31.38	225608	225608	#N/A	0	0	#N/A	#N/A	0.003649	VACV			FALSE
20221007_MS_MRMhr_DC24_VACV_53C_r1.wiff	53C_r1	LSYIYNML	8	C48H73N9O14S	LSYIYNM[+16]L	LSYIYNM(unimod:35)L	LSYIYNM[Oxi]L	LSYIYNM[Oxidation (M)]L	0	0.9915	#N/A	31.32+/-0.09	#N/A	1031.5	2	516.757	#N/A	31.38	197042	197042	#N/A	0	0	#N/A	#N/A	0.003314	VACV			FALSE
20221007_MS_MRMhr_DC24_VACV_53C_r2.wiff	53C_r2	LSYIYNML	8	C48H73N9O14S	LSYIYNM[+16]L	LSYIYNM(unimod:35)L	LSYIYNM[Oxi]L	LSYIYNM[Oxidation (M)]L	0	0.9891	#N/A	31.32+/-0.09	#N/A	1031.5	2	516.757	#N/A	31.38	194480	194480	#N/A	0	0	#N/A	#N/A	0.004542	VACV			FALSE
20221007_MS_MRMhr_DC24_VACV_53C_r3.wiff	53C_r3	LSYIYNML	8	C48H73N9O14S	LSYIYNM[+16]L	LSYIYNM(unimod:35)L	LSYIYNM[Oxi]L	LSYIYNM[Oxidation (M)]L	0	0.9903	#N/A	31.32+/-0.09	#N/A	1031.5	2	516.757	#N/A	31.38	241707	241707	#N/A	0	0	#N/A	#N/A	0.004401	VACV			FALSE
20221007_MS_MRMhr_DC24_VACV_57C_r1.wiff	57C_r1	LSYIYNML	8	C48H73N9O14S	LSYIYNM[+16]L	LSYIYNM(unimod:35)L	LSYIYNM[Oxi]L	LSYIYNM[Oxidation (M)]L	0	0.9332	#N/A	31.32+/-0.09	#N/A	1031.5	2	516.757	#N/A	31.38	20707	20707	#N/A	0	0	#N/A	#N/A	0.000626	VACV			FALSE
20221007_MS_MRMhr_DC24_VACV_57C_r2.wiff	57C_r2	LSYIYNML	8	C48H73N9O14S	LSYIYNM[+16]L	LSYIYNM(unimod:35)L	LSYIYNM[Oxi]L	LSYIYNM[Oxidation (M)]L	0	0.9338	#N/A	31.32+/-0.09	#N/A	1031.5	2	516.757	#N/A	31.38	26672	26672	#N/A	0	0	#N/A	#N/A	0.000862	VACV			FALSE
20221007_MS_MRMhr_DC24_VACV_57C_r3.wiff	57C_r3	LSYIYNML	8	C48H73N9O14S	LSYIYNM[+16]L	LSYIYNM(unimod:35)L	LSYIYNM[Oxi]L	LSYIYNM[Oxidation (M)]L	0	0.9388	#N/A	31.32+/-0.09	#N/A	1031.5	2	516.757	#N/A	31.38	18529	18529	#N/A	0	0	#N/A	#N/A	0.000702	VACV			FALSE
20221007_MS_MRMhr_DC24_VACV_61C_r1.wiff	61C_r1	LSYIYNML	8	C48H73N9O14S	LSYIYNM[+16]L	LSYIYNM(unimod:35)L	LSYIYNM[Oxi]L	LSYIYNM[Oxidation (M)]L	0	0.8077	#N/A	31.32+/-0.09	#N/A	1031.5	2	516.757	#N/A	31.38	7784	7784	#N/A	0	0	#N/A	#N/A	0.000367	VACV			FALSE
20221007_MS_MRMhr_DC24_VACV_61C_r2.wiff	61C_r2	LSYIYNML	8	C48H73N9O14S	LSYIYNM[+16]L	LSYIYNM(unimod:35)L	LSYIYNM[Oxi]L	LSYIYNM[Oxidation (M)]L	0	0.8494	#N/A	31.32+/-0.09	#N/A	1031.5	2	516.757	#N/A	31.38	9481	9481	#N/A	0	0	#N/A	#N/A	0.000455	VACV			FALSE
20221007_MS_MRMhr_DC24_VACV_61C_r3.wiff	61C_r3	LSYIYNML	8	C48H73N9O14S	LSYIYNM[+16]L	LSYIYNM(unimod:35)L	LSYIYNM[Oxi]L	LSYIYNM[Oxidation (M)]L	0	0.8576	#N/A	31.32+/-0.09	#N/A	1031.5	2	516.757	#N/A	31.38	8593	8593	#N/A	0	0	#N/A	#N/A	0.000369	VACV			FALSE
20221007_MS_MRMhr_DC24_VACV_65C_r1.wiff	65C_r1	LSYIYNML	8	C48H73N9O14S	LSYIYNM[+16]L	LSYIYNM(unimod:35)L	LSYIYNM[Oxi]L	LSYIYNM[Oxidation (M)]L	0	0.7572	#N/A	31.32+/-0.09	#N/A	1031.5	2	516.757	#N/A	31.38	4395	4395	#N/A	0	0	#N/A	#N/A	âˆž	VACV			FALSE
20221007_MS_MRMhr_DC24_VACV_65C_r2.wiff	65C_r2	LSYIYNML	8	C48H73N9O14S	LSYIYNM[+16]L	LSYIYNM(unimod:35)L	LSYIYNM[Oxi]L	LSYIYNM[Oxidation (M)]L	0	0.6233	#N/A	31.32+/-0.09	#N/A	1031.5	2	516.757	#N/A	31.38	2768	2768	#N/A	1054	1054	#N/A	#N/A	âˆž	VACV			FALSE
20221007_MS_MRMhr_DC24_VACV_69C_r1.wiff	69C_r1	LSYIYNML	8	C48H73N9O14S	LSYIYNM[+16]L	LSYIYNM(unimod:35)L	LSYIYNM[Oxi]L	LSYIYNM[Oxidation (M)]L	0	0.8531	#N/A	31.32+/-0.09	#N/A	1031.5	2	516.757	#N/A	31.38	5612	5612	#N/A	0	0	#N/A	#N/A	âˆž	VACV			FALSE
20221007_MS_MRMhr_DC24_VACV_69C_r2.wiff	69C_r2	LSYIYNML	8	C48H73N9O14S	LSYIYNM[+16]L	LSYIYNM(unimod:35)L	LSYIYNM[Oxi]L	LSYIYNM[Oxidation (M)]L	0	0.8302	#N/A	31.32+/-0.09	#N/A	1031.5	2	516.757	#N/A	31.38	4987	4987	#N/A	331	331	#N/A	#N/A	âˆž	VACV			FALSE
20221007_MS_MRMhr_DC24_VACV_69C_r3.wiff	69C_r3	LSYIYNML	8	C48H73N9O14S	LSYIYNM[+16]L	LSYIYNM(unimod:35)L	LSYIYNM[Oxi]L	LSYIYNM[Oxidation (M)]L	0	0.9738	#N/A	31.32+/-0.09	#N/A	1031.5	2	516.757	#N/A	31.38	4804	4804	#N/A	0	0	#N/A	#N/A	âˆž	VACV			FALSE
20221007_MS_MRMhr_DC24_VACV_73C_r1.wiff	73C_r1	LSYIYNML	8	C48H73N9O14S	LSYIYNM[+16]L	LSYIYNM(unimod:35)L	LSYIYNM[Oxi]L	LSYIYNM[Oxidation (M)]L	0	0.7048	#N/A	31.32+/-0.09	#N/A	1031.5	2	516.757	#N/A	31.38	4923	4923	#N/A	0	0	#N/A	#N/A	âˆž	VACV			FALSE
20221007_MS_MRMhr_DC24_VACV_73C_r2.wiff	73C_r2	LSYIYNML	8	C48H73N9O14S	LSYIYNM[+16]L	LSYIYNM(unimod:35)L	LSYIYNM[Oxi]L	LSYIYNM[Oxidation (M)]L	0	0.8498	#N/A	31.32+/-0.09	#N/A	1031.5	2	516.757	#N/A	31.38	6880	6880	#N/A	0	0	#N/A	#N/A	âˆž	VACV			FALSE
20221007_MS_MRMhr_DC24_VACV_73C_r3.wiff	73C_r3	LSYIYNML	8	C48H73N9O14S	LSYIYNM[+16]L	LSYIYNM(unimod:35)L	LSYIYNM[Oxi]L	LSYIYNM[Oxidation (M)]L	0	0.7664	#N/A	31.32+/-0.09	#N/A	1031.5	2	516.757	#N/A	31.38	6404	6404	#N/A	0	0	#N/A	#N/A	âˆž	VACV			FALSE
20221010_MS_zenoSWATH_DC24_VACV_37C_r1.wiff	SWATH_r1	SAPMNVDNLIMIV	13	C61H105N15O19S2	SAPMNVDNLIMIV	SAPMNVDNLIMIV	SAPMNVDNLIMIV	SAPMNVDNLIMIV	0.8671	0.9733	#N/A	45.71+/-0.06	#N/A	1415.72	2	708.865	#N/A	45.73	20171	11161	9010	0	0	0	#N/A	0.000147	VACV			FALSE
20221010_MS_zenoSWATH_DC24_VACV_37C_r2.wiff	SWATH_r2	SAPMNVDNLIMIV	13	C61H105N15O19S2	SAPMNVDNLIMIV	SAPMNVDNLIMIV	SAPMNVDNLIMIV	SAPMNVDNLIMIV	0.9493	0.9965	#N/A	45.71+/-0.06	#N/A	1415.72	2	708.865	#N/A	45.73	201255	116364	84891	78	78	0	#N/A	0.002085	VACV			FALSE
20221010_MS_zenoSWATH_DC24_VACV_37C_r3.wiff	SWATH_r3	SAPMNVDNLIMIV	13	C61H105N15O19S2	SAPMNVDNLIMIV	SAPMNVDNLIMIV	SAPMNVDNLIMIV	SAPMNVDNLIMIV	0.9246	0.9627	#N/A	45.71+/-0.06	#N/A	1415.72	2	708.865	#N/A	45.73	17081	11835	5245	0	0	0	#N/A	0.00015	VACV			FALSE
20221007_MS_MRMhr_DC24_VACV_37C_r1.wiff	37C_r1	SAPMNVDNLIMIV	13	C61H105N15O19S2	SAPMNVDNLIMIV	SAPMNVDNLIMIV	SAPMNVDNLIMIV	SAPMNVDNLIMIV	0.6645	0.9713	#N/A	45.71+/-0.06	#N/A	1415.72	2	708.865	#N/A	45.73	25851	22546	3305	0	0	0	#N/A	0.000218	VACV			FALSE
20221007_MS_MRMhr_DC24_VACV_37C_r2.wiff	37C_r2	SAPMNVDNLIMIV	13	C61H105N15O19S2	SAPMNVDNLIMIV	SAPMNVDNLIMIV	SAPMNVDNLIMIV	SAPMNVDNLIMIV	0.9275	0.9989	#N/A	45.71+/-0.06	#N/A	1415.72	2	708.865	#N/A	45.73	416126	318469	97657	5606	5606	0	#N/A	0.003475	VACV			FALSE
20221007_MS_MRMhr_DC24_VACV_37C_r3.wiff	37C_r3	SAPMNVDNLIMIV	13	C61H105N15O19S2	SAPMNVDNLIMIV	SAPMNVDNLIMIV	SAPMNVDNLIMIV	SAPMNVDNLIMIV	0.596	0.9902	#N/A	45.71+/-0.06	#N/A	1415.72	2	708.865	#N/A	45.73	34932	23858	11074	483	483	0	#N/A	0.00035	VACV			FALSE
20221007_MS_MRMhr_DC24_VACV_41C_r1.wiff	41C_r1	SAPMNVDNLIMIV	13	C61H105N15O19S2	SAPMNVDNLIMIV	SAPMNVDNLIMIV	SAPMNVDNLIMIV	SAPMNVDNLIMIV	0.8283	0.9948	#N/A	45.71+/-0.06	#N/A	1415.72	2	708.865	#N/A	45.73	154558	124804	29754	1728	1728	0	#N/A	0.002178	VACV			FALSE
20221007_MS_MRMhr_DC24_VACV_41C_r2.wiff	41C_r2	SAPMNVDNLIMIV	13	C61H105N15O19S2	SAPMNVDNLIMIV	SAPMNVDNLIMIV	SAPMNVDNLIMIV	SAPMNVDNLIMIV	0.9213	0.9978	#N/A	45.71+/-0.06	#N/A	1415.72	2	708.865	#N/A	45.73	262560	208236	54324	0	0	0	#N/A	0.002315	VACV			FALSE
20221007_MS_MRMhr_DC24_VACV_41C_r3.wiff	41C_r3	SAPMNVDNLIMIV	13	C61H105N15O19S2	SAPMNVDNLIMIV	SAPMNVDNLIMIV	SAPMNVDNLIMIV	SAPMNVDNLIMIV	0.8876	0.9963	#N/A	45.71+/-0.06	#N/A	1415.72	2	708.865	#N/A	45.73	177627	136261	41366	4292	4292	0	#N/A	0.001378	VACV			FALSE
20221007_MS_MRMhr_DC24_VACV_45C_r1.wiff	45C_r1	SAPMNVDNLIMIV	13	C61H105N15O19S2	SAPMNVDNLIMIV	SAPMNVDNLIMIV	SAPMNVDNLIMIV	SAPMNVDNLIMIV	0.6973	0.9863	#N/A	45.71+/-0.06	#N/A	1415.72	2	708.865	#N/A	45.73	103356	62045	41311	878	878	0	#N/A	0.001079	VACV			FALSE
20221007_MS_MRMhr_DC24_VACV_45C_r2.wiff	45C_r2	SAPMNVDNLIMIV	13	C61H105N15O19S2	SAPMNVDNLIMIV	SAPMNVDNLIMIV	SAPMNVDNLIMIV	SAPMNVDNLIMIV	0.8401	0.9902	#N/A	45.71+/-0.06	#N/A	1415.72	2	708.865	#N/A	45.73	152103	128914	23189	0	0	0	#N/A	0.00149	VACV			FALSE
20221007_MS_MRMhr_DC24_VACV_45C_r3.wiff	45C_r3	SAPMNVDNLIMIV	13	C61H105N15O19S2	SAPMNVDNLIMIV	SAPMNVDNLIMIV	SAPMNVDNLIMIV	SAPMNVDNLIMIV	0.7173	0.9934	#N/A	45.71+/-0.06	#N/A	1415.72	2	708.865	#N/A	45.73	69890	61243	8647	0	0	0	#N/A	0.000634	VACV			FALSE
20221007_MS_MRMhr_DC24_VACV_49C_r1.wiff	49C_r1	SAPMNVDNLIMIV	13	C61H105N15O19S2	SAPMNVDNLIMIV	SAPMNVDNLIMIV	SAPMNVDNLIMIV	SAPMNVDNLIMIV	0.9094	0.9961	#N/A	45.71+/-0.06	#N/A	1415.72	2	708.865	#N/A	45.73	116908	98902	18006	6412	1144	5268	#N/A	0.001941	VACV			FALSE
20221007_MS_MRMhr_DC24_VACV_49C_r2.wiff	49C_r2	SAPMNVDNLIMIV	13	C61H105N15O19S2	SAPMNVDNLIMIV	SAPMNVDNLIMIV	SAPMNVDNLIMIV	SAPMNVDNLIMIV	0.5656	0.9829	#N/A	45.71+/-0.06	#N/A	1415.72	2	708.865	#N/A	45.73	46221	40354	5867	0	0	0	#N/A	0.0006	VACV			FALSE
20221007_MS_MRMhr_DC24_VACV_49C_r3.wiff	49C_r3	SAPMNVDNLIMIV	13	C61H105N15O19S2	SAPMNVDNLIMIV	SAPMNVDNLIMIV	SAPMNVDNLIMIV	SAPMNVDNLIMIV	0.7787	0.9928	#N/A	45.71+/-0.06	#N/A	1415.72	2	708.865	#N/A	45.73	71815	59599	12217	0	0	0	#N/A	0.001162	VACV			FALSE
20221007_MS_MRMhr_DC24_VACV_53C_r1.wiff	53C_r1	SAPMNVDNLIMIV	13	C61H105N15O19S2	SAPMNVDNLIMIV	SAPMNVDNLIMIV	SAPMNVDNLIMIV	SAPMNVDNLIMIV	0.1759	0.9898	#N/A	45.71+/-0.06	#N/A	1415.72	2	708.865	#N/A	45.73	12620	12279	341	1008	1008	0	#N/A	0.000212	VACV			FALSE
20221007_MS_MRMhr_DC24_VACV_53C_r2.wiff	53C_r2	SAPMNVDNLIMIV	13	C61H105N15O19S2	SAPMNVDNLIMIV	SAPMNVDNLIMIV	SAPMNVDNLIMIV	SAPMNVDNLIMIV	0.6521	0.9657	#N/A	45.71+/-0.06	#N/A	1415.72	2	708.865	#N/A	45.73	14731	11015	3716	0	0	0	#N/A	0.000344	VACV			FALSE
20221007_MS_MRMhr_DC24_VACV_53C_r3.wiff	53C_r3	SAPMNVDNLIMIV	13	C61H105N15O19S2	SAPMNVDNLIMIV	SAPMNVDNLIMIV	SAPMNVDNLIMIV	SAPMNVDNLIMIV	0	0.9698	#N/A	45.71+/-0.06	#N/A	1415.72	2	708.865	#N/A	45.73	10658	10658	0	221	221	0	#N/A	0.000194	VACV			FALSE
20221007_MS_MRMhr_DC24_VACV_57C_r1.wiff	57C_r1	SAPMNVDNLIMIV	13	C61H105N15O19S2	SAPMNVDNLIMIV	SAPMNVDNLIMIV	SAPMNVDNLIMIV	SAPMNVDNLIMIV	0.7283	0.9423	#N/A	45.71+/-0.06	#N/A	1415.72	2	708.865	#N/A	45.73	30263	27448	2815	3751	3751	0	#N/A	0.000915	VACV			FALSE
20221007_MS_MRMhr_DC24_VACV_57C_r2.wiff	57C_r2	SAPMNVDNLIMIV	13	C61H105N15O19S2	SAPMNVDNLIMIV	SAPMNVDNLIMIV	SAPMNVDNLIMIV	SAPMNVDNLIMIV	0	0.9592	#N/A	45.71+/-0.06	#N/A	1415.72	2	708.865	#N/A	45.73	7034	7034	0	860	860	0	#N/A	0.000227	VACV			FALSE
20221007_MS_MRMhr_DC24_VACV_57C_r3.wiff	57C_r3	SAPMNVDNLIMIV	13	C61H105N15O19S2	SAPMNVDNLIMIV	SAPMNVDNLIMIV	SAPMNVDNLIMIV	SAPMNVDNLIMIV	0.3316	0.9648	#N/A	45.71+/-0.06	#N/A	1415.72	2	708.865	#N/A	45.73	20849	20103	747	6217	6217	0	#N/A	0.00079	VACV			FALSE
20221007_MS_MRMhr_DC24_VACV_61C_r1.wiff	61C_r1	SAPMNVDNLIMIV	13	C61H105N15O19S2	SAPMNVDNLIMIV	SAPMNVDNLIMIV	SAPMNVDNLIMIV	SAPMNVDNLIMIV	0	0.8969	#N/A	45.71+/-0.06	#N/A	1415.72	2	708.865	#N/A	45.73	8339	8339	0	0	0	0	#N/A	0.000393	VACV			FALSE
20221007_MS_MRMhr_DC24_VACV_61C_r2.wiff	61C_r2	SAPMNVDNLIMIV	13	C61H105N15O19S2	SAPMNVDNLIMIV	SAPMNVDNLIMIV	SAPMNVDNLIMIV	SAPMNVDNLIMIV	0	0.9773	#N/A	45.71+/-0.06	#N/A	1415.72	2	708.865	#N/A	45.73	4467	4467	0	966	966	0	#N/A	0.000214	VACV			FALSE
20221007_MS_MRMhr_DC24_VACV_61C_r3.wiff	61C_r3	SAPMNVDNLIMIV	13	C61H105N15O19S2	SAPMNVDNLIMIV	SAPMNVDNLIMIV	SAPMNVDNLIMIV	SAPMNVDNLIMIV	0.5157	0.9083	#N/A	45.71+/-0.06	#N/A	1415.72	2	708.865	#N/A	45.73	15468	14970	498	40	40	0	#N/A	0.000664	VACV			FALSE
20221007_MS_MRMhr_DC24_VACV_65C_r1.wiff	65C_r1	SAPMNVDNLIMIV	13	C61H105N15O19S2	SAPMNVDNLIMIV	SAPMNVDNLIMIV	SAPMNVDNLIMIV	SAPMNVDNLIMIV	0	0.7231	#N/A	45.71+/-0.06	#N/A	1415.72	2	708.865	#N/A	45.73	6004	6004	0	0	0	0	#N/A	âˆž	VACV			FALSE
20221007_MS_MRMhr_DC24_VACV_65C_r2.wiff	65C_r2	SAPMNVDNLIMIV	13	C61H105N15O19S2	SAPMNVDNLIMIV	SAPMNVDNLIMIV	SAPMNVDNLIMIV	SAPMNVDNLIMIV	0	0.8107	#N/A	45.71+/-0.06	#N/A	1415.72	2	708.865	#N/A	45.73	2537	2537	0	363	363	0	#N/A	âˆž	VACV			FALSE
20221007_MS_MRMhr_DC24_VACV_69C_r1.wiff	69C_r1	SAPMNVDNLIMIV	13	C61H105N15O19S2	SAPMNVDNLIMIV	SAPMNVDNLIMIV	SAPMNVDNLIMIV	SAPMNVDNLIMIV	0	0.9193	#N/A	45.71+/-0.06	#N/A	1415.72	2	708.865	#N/A	45.73	10344	10344	0	2489	2489	0	#N/A	âˆž	VACV			FALSE
20221007_MS_MRMhr_DC24_VACV_69C_r2.wiff	69C_r2	SAPMNVDNLIMIV	13	C61H105N15O19S2	SAPMNVDNLIMIV	SAPMNVDNLIMIV	SAPMNVDNLIMIV	SAPMNVDNLIMIV	0.5171	0.9413	#N/A	45.71+/-0.06	#N/A	1415.72	2	708.865	#N/A	45.73	9882	9288	594	3457	3457	0	#N/A	âˆž	VACV			FALSE
20221007_MS_MRMhr_DC24_VACV_69C_r3.wiff	69C_r3	SAPMNVDNLIMIV	13	C61H105N15O19S2	SAPMNVDNLIMIV	SAPMNVDNLIMIV	SAPMNVDNLIMIV	SAPMNVDNLIMIV	0	0.9242	#N/A	45.71+/-0.06	#N/A	1415.72	2	708.865	#N/A	45.73	11131	11131	0	627	627	0	#N/A	âˆž	VACV			FALSE
20221007_MS_MRMhr_DC24_VACV_73C_r1.wiff	73C_r1	SAPMNVDNLIMIV	13	C61H105N15O19S2	SAPMNVDNLIMIV	SAPMNVDNLIMIV	SAPMNVDNLIMIV	SAPMNVDNLIMIV	0	0.9605	#N/A	45.71+/-0.06	#N/A	1415.72	2	708.865	#N/A	45.73	22436	22436	0	0	0	0	#N/A	âˆž	VACV			FALSE
20221007_MS_MRMhr_DC24_VACV_73C_r2.wiff	73C_r2	SAPMNVDNLIMIV	13	C61H105N15O19S2	SAPMNVDNLIMIV	SAPMNVDNLIMIV	SAPMNVDNLIMIV	SAPMNVDNLIMIV	0.6709	0.9231	#N/A	45.71+/-0.06	#N/A	1415.72	2	708.865	#N/A	45.73	46108	40137	5971	3122	3122	0	#N/A	âˆž	VACV			FALSE
20221007_MS_MRMhr_DC24_VACV_73C_r3.wiff	73C_r3	SAPMNVDNLIMIV	13	C61H105N15O19S2	SAPMNVDNLIMIV	SAPMNVDNLIMIV	SAPMNVDNLIMIV	SAPMNVDNLIMIV	0.3213	0.9484	#N/A	45.71+/-0.06	#N/A	1415.72	2	708.865	#N/A	45.73	29819	29102	716	0	0	0	#N/A	âˆž	VACV			FALSE
20221010_MS_zenoSWATH_DC24_VACV_37C_r1.wiff	SWATH_r1	SAPMNVDNLIMIV	13	C61H105N15O20S2	SAPM[+16]NVDNLIMIV	SAPM(unimod:35)NVDNLIMIV	SAPM[Oxi]NVDNLIMIV	SAPM[Oxidation (M)]NVDNLIMIV	0.9277	0.9834	#N/A	41.13+/-0.06	#N/A	1431.71	2	716.862	#N/A	41.06	78081	39679	38402	0	0	0	#N/A	0.000569	VACV			FALSE
20221010_MS_zenoSWATH_DC24_VACV_37C_r2.wiff	SWATH_r2	SAPMNVDNLIMIV	13	C61H105N15O20S2	SAPM[+16]NVDNLIMIV	SAPM(unimod:35)NVDNLIMIV	SAPM[Oxi]NVDNLIMIV	SAPM[Oxidation (M)]NVDNLIMIV	0.9731	0.9879	#N/A	41.13+/-0.06	#N/A	1431.71	2	716.862	#N/A	41.06	235862	123654	112208	511	511	0	#N/A	0.002444	VACV			FALSE
20221010_MS_zenoSWATH_DC24_VACV_37C_r3.wiff	SWATH_r3	SAPMNVDNLIMIV	13	C61H105N15O20S2	SAPM[+16]NVDNLIMIV	SAPM(unimod:35)NVDNLIMIV	SAPM[Oxi]NVDNLIMIV	SAPM[Oxidation (M)]NVDNLIMIV	0.9326	0.9875	#N/A	41.13+/-0.06	#N/A	1431.71	2	716.862	#N/A	41.06	84565	47226	37339	34	34	0	#N/A	0.000741	VACV			FALSE
20221007_MS_MRMhr_DC24_VACV_37C_r1.wiff	37C_r1	SAPMNVDNLIMIV	13	C61H105N15O20S2	SAPM[+16]NVDNLIMIV	SAPM(unimod:35)NVDNLIMIV	SAPM[Oxi]NVDNLIMIV	SAPM[Oxidation (M)]NVDNLIMIV	0	0.9906	#N/A	41.13+/-0.06	#N/A	1431.71	2	716.862	#N/A	41.06	95049	95049	#N/A	3229	3229	#N/A	#N/A	0.000802	VACV			FALSE
20221007_MS_MRMhr_DC24_VACV_37C_r2.wiff	37C_r2	SAPMNVDNLIMIV	13	C61H105N15O20S2	SAPM[+16]NVDNLIMIV	SAPM(unimod:35)NVDNLIMIV	SAPM[Oxi]NVDNLIMIV	SAPM[Oxidation (M)]NVDNLIMIV	0	0.9964	#N/A	41.13+/-0.06	#N/A	1431.71	2	716.862	#N/A	41.06	277023	277023	#N/A	5638	5638	#N/A	#N/A	0.002314	VACV			FALSE
20221007_MS_MRMhr_DC24_VACV_37C_r3.wiff	37C_r3	SAPMNVDNLIMIV	13	C61H105N15O20S2	SAPM[+16]NVDNLIMIV	SAPM(unimod:35)NVDNLIMIV	SAPM[Oxi]NVDNLIMIV	SAPM[Oxidation (M)]NVDNLIMIV	0	0.9942	#N/A	41.13+/-0.06	#N/A	1431.71	2	716.862	#N/A	41.06	89003	89003	#N/A	686	686	#N/A	#N/A	0.000892	VACV			FALSE
20221007_MS_MRMhr_DC24_VACV_41C_r1.wiff	41C_r1	SAPMNVDNLIMIV	13	C61H105N15O20S2	SAPM[+16]NVDNLIMIV	SAPM(unimod:35)NVDNLIMIV	SAPM[Oxi]NVDNLIMIV	SAPM[Oxidation (M)]NVDNLIMIV	0	0.9956	#N/A	41.13+/-0.06	#N/A	1431.71	2	716.862	#N/A	41.06	205556	205556	#N/A	3802	3802	#N/A	#N/A	0.002897	VACV			FALSE
20221007_MS_MRMhr_DC24_VACV_41C_r2.wiff	41C_r2	SAPMNVDNLIMIV	13	C61H105N15O20S2	SAPM[+16]NVDNLIMIV	SAPM(unimod:35)NVDNLIMIV	SAPM[Oxi]NVDNLIMIV	SAPM[Oxidation (M)]NVDNLIMIV	0	0.997	#N/A	41.13+/-0.06	#N/A	1431.71	2	716.862	#N/A	41.06	392770	392770	#N/A	9622	9622	#N/A	#N/A	0.003463	VACV			FALSE
20221007_MS_MRMhr_DC24_VACV_41C_r3.wiff	41C_r3	SAPMNVDNLIMIV	13	C61H105N15O20S2	SAPM[+16]NVDNLIMIV	SAPM(unimod:35)NVDNLIMIV	SAPM[Oxi]NVDNLIMIV	SAPM[Oxidation (M)]NVDNLIMIV	0	0.9976	#N/A	41.13+/-0.06	#N/A	1431.71	2	716.862	#N/A	41.06	359375	359375	#N/A	8161	8161	#N/A	#N/A	0.002789	VACV			FALSE
20221007_MS_MRMhr_DC24_VACV_45C_r1.wiff	45C_r1	SAPMNVDNLIMIV	13	C61H105N15O20S2	SAPM[+16]NVDNLIMIV	SAPM(unimod:35)NVDNLIMIV	SAPM[Oxi]NVDNLIMIV	SAPM[Oxidation (M)]NVDNLIMIV	0	0.9984	#N/A	41.13+/-0.06	#N/A	1431.71	2	716.862	#N/A	41.06	169419	169419	#N/A	3634	3634	#N/A	#N/A	0.001768	VACV			FALSE
20221007_MS_MRMhr_DC24_VACV_45C_r2.wiff	45C_r2	SAPMNVDNLIMIV	13	C61H105N15O20S2	SAPM[+16]NVDNLIMIV	SAPM(unimod:35)NVDNLIMIV	SAPM[Oxi]NVDNLIMIV	SAPM[Oxidation (M)]NVDNLIMIV	0	0.9943	#N/A	41.13+/-0.06	#N/A	1431.71	2	716.862	#N/A	41.06	262300	262300	#N/A	4010	4010	#N/A	#N/A	0.002569	VACV			FALSE
20221007_MS_MRMhr_DC24_VACV_45C_r3.wiff	45C_r3	SAPMNVDNLIMIV	13	C61H105N15O20S2	SAPM[+16]NVDNLIMIV	SAPM(unimod:35)NVDNLIMIV	SAPM[Oxi]NVDNLIMIV	SAPM[Oxidation (M)]NVDNLIMIV	0	0.9905	#N/A	41.13+/-0.06	#N/A	1431.71	2	716.862	#N/A	41.06	195648	195648	#N/A	2928	2928	#N/A	#N/A	0.001774	VACV			FALSE
20221007_MS_MRMhr_DC24_VACV_49C_r1.wiff	49C_r1	SAPMNVDNLIMIV	13	C61H105N15O20S2	SAPM[+16]NVDNLIMIV	SAPM(unimod:35)NVDNLIMIV	SAPM[Oxi]NVDNLIMIV	SAPM[Oxidation (M)]NVDNLIMIV	0	0.9958	#N/A	41.13+/-0.06	#N/A	1431.71	2	716.862	#N/A	41.06	119199	119199	#N/A	6532	6532	#N/A	#N/A	0.001979	VACV			FALSE
20221007_MS_MRMhr_DC24_VACV_49C_r2.wiff	49C_r2	SAPMNVDNLIMIV	13	C61H105N15O20S2	SAPM[+16]NVDNLIMIV	SAPM(unimod:35)NVDNLIMIV	SAPM[Oxi]NVDNLIMIV	SAPM[Oxidation (M)]NVDNLIMIV	0	0.9967	#N/A	41.13+/-0.06	#N/A	1431.71	2	716.862	#N/A	41.06	93014	93014	#N/A	619	619	#N/A	#N/A	0.001207	VACV			FALSE
20221007_MS_MRMhr_DC24_VACV_49C_r3.wiff	49C_r3	SAPMNVDNLIMIV	13	C61H105N15O20S2	SAPM[+16]NVDNLIMIV	SAPM(unimod:35)NVDNLIMIV	SAPM[Oxi]NVDNLIMIV	SAPM[Oxidation (M)]NVDNLIMIV	0	0.9959	#N/A	41.13+/-0.06	#N/A	1431.71	2	716.862	#N/A	41.06	95921	95921	#N/A	703	703	#N/A	#N/A	0.001552	VACV			FALSE
20221007_MS_MRMhr_DC24_VACV_53C_r1.wiff	53C_r1	SAPMNVDNLIMIV	13	C61H105N15O20S2	SAPM[+16]NVDNLIMIV	SAPM(unimod:35)NVDNLIMIV	SAPM[Oxi]NVDNLIMIV	SAPM[Oxidation (M)]NVDNLIMIV	0	0.9945	#N/A	41.13+/-0.06	#N/A	1431.71	2	716.862	#N/A	41.06	27927	27927	#N/A	0	0	#N/A	#N/A	0.00047	VACV			FALSE
20221007_MS_MRMhr_DC24_VACV_53C_r2.wiff	53C_r2	SAPMNVDNLIMIV	13	C61H105N15O20S2	SAPM[+16]NVDNLIMIV	SAPM(unimod:35)NVDNLIMIV	SAPM[Oxi]NVDNLIMIV	SAPM[Oxidation (M)]NVDNLIMIV	0	0.9977	#N/A	41.13+/-0.06	#N/A	1431.71	2	716.862	#N/A	41.06	34016	34016	#N/A	162	162	#N/A	#N/A	0.000794	VACV			FALSE
20221007_MS_MRMhr_DC24_VACV_53C_r3.wiff	53C_r3	SAPMNVDNLIMIV	13	C61H105N15O20S2	SAPM[+16]NVDNLIMIV	SAPM(unimod:35)NVDNLIMIV	SAPM[Oxi]NVDNLIMIV	SAPM[Oxidation (M)]NVDNLIMIV	0	0.9926	#N/A	41.13+/-0.06	#N/A	1431.71	2	716.862	#N/A	41.06	33793	33793	#N/A	0	0	#N/A	#N/A	0.000615	VACV			FALSE
20221007_MS_MRMhr_DC24_VACV_57C_r1.wiff	57C_r1	SAPMNVDNLIMIV	13	C61H105N15O20S2	SAPM[+16]NVDNLIMIV	SAPM(unimod:35)NVDNLIMIV	SAPM[Oxi]NVDNLIMIV	SAPM[Oxidation (M)]NVDNLIMIV	0	0.8381	#N/A	41.13+/-0.06	#N/A	1431.71	2	716.862	#N/A	41.06	28764	28764	#N/A	0	0	#N/A	#N/A	0.00087	VACV			FALSE
20221007_MS_MRMhr_DC24_VACV_57C_r2.wiff	57C_r2	SAPMNVDNLIMIV	13	C61H105N15O20S2	SAPM[+16]NVDNLIMIV	SAPM(unimod:35)NVDNLIMIV	SAPM[Oxi]NVDNLIMIV	SAPM[Oxidation (M)]NVDNLIMIV	0	0.8436	#N/A	41.13+/-0.06	#N/A	1431.71	2	716.862	#N/A	41.06	20857	20857	#N/A	0	0	#N/A	#N/A	0.000674	VACV			FALSE
20221007_MS_MRMhr_DC24_VACV_57C_r3.wiff	57C_r3	SAPMNVDNLIMIV	13	C61H105N15O20S2	SAPM[+16]NVDNLIMIV	SAPM(unimod:35)NVDNLIMIV	SAPM[Oxi]NVDNLIMIV	SAPM[Oxidation (M)]NVDNLIMIV	0	0.7844	#N/A	41.13+/-0.06	#N/A	1431.71	2	716.862	#N/A	41.06	30684	30684	#N/A	0	0	#N/A	#N/A	0.001162	VACV			FALSE
20221007_MS_MRMhr_DC24_VACV_61C_r1.wiff	61C_r1	SAPMNVDNLIMIV	13	C61H105N15O20S2	SAPM[+16]NVDNLIMIV	SAPM(unimod:35)NVDNLIMIV	SAPM[Oxi]NVDNLIMIV	SAPM[Oxidation (M)]NVDNLIMIV	0	0.7434	#N/A	41.13+/-0.06	#N/A	1431.71	2	716.862	#N/A	41.06	20663	20663	#N/A	0	0	#N/A	#N/A	0.000974	VACV			FALSE
20221007_MS_MRMhr_DC24_VACV_61C_r2.wiff	61C_r2	SAPMNVDNLIMIV	13	C61H105N15O20S2	SAPM[+16]NVDNLIMIV	SAPM(unimod:35)NVDNLIMIV	SAPM[Oxi]NVDNLIMIV	SAPM[Oxidation (M)]NVDNLIMIV	0	0.6977	#N/A	41.13+/-0.06	#N/A	1431.71	2	716.862	#N/A	41.06	17477	17477	#N/A	0	0	#N/A	#N/A	0.000838	VACV			FALSE
20221007_MS_MRMhr_DC24_VACV_61C_r3.wiff	61C_r3	SAPMNVDNLIMIV	13	C61H105N15O20S2	SAPM[+16]NVDNLIMIV	SAPM(unimod:35)NVDNLIMIV	SAPM[Oxi]NVDNLIMIV	SAPM[Oxidation (M)]NVDNLIMIV	0	0.6959	#N/A	41.13+/-0.06	#N/A	1431.71	2	716.862	#N/A	41.06	34400	34400	#N/A	0	0	#N/A	#N/A	0.001476	VACV			FALSE
20221007_MS_MRMhr_DC24_VACV_65C_r1.wiff	65C_r1	SAPMNVDNLIMIV	13	C61H105N15O20S2	SAPM[+16]NVDNLIMIV	SAPM(unimod:35)NVDNLIMIV	SAPM[Oxi]NVDNLIMIV	SAPM[Oxidation (M)]NVDNLIMIV	0	0.9126	#N/A	41.13+/-0.06	#N/A	1431.71	2	716.862	#N/A	41.06	16170	16170	#N/A	0	0	#N/A	#N/A	âˆž	VACV			FALSE
20221007_MS_MRMhr_DC24_VACV_65C_r2.wiff	65C_r2	SAPMNVDNLIMIV	13	C61H105N15O20S2	SAPM[+16]NVDNLIMIV	SAPM(unimod:35)NVDNLIMIV	SAPM[Oxi]NVDNLIMIV	SAPM[Oxidation (M)]NVDNLIMIV	0	0.8107	#N/A	41.13+/-0.06	#N/A	1431.71	2	716.862	#N/A	41.06	7527	7527	#N/A	0	0	#N/A	#N/A	âˆž	VACV			FALSE
20221007_MS_MRMhr_DC24_VACV_69C_r1.wiff	69C_r1	SAPMNVDNLIMIV	13	C61H105N15O20S2	SAPM[+16]NVDNLIMIV	SAPM(unimod:35)NVDNLIMIV	SAPM[Oxi]NVDNLIMIV	SAPM[Oxidation (M)]NVDNLIMIV	0	0.8612	#N/A	41.13+/-0.06	#N/A	1431.71	2	716.862	#N/A	41.06	13923	13923	#N/A	0	0	#N/A	#N/A	âˆž	VACV			FALSE
20221007_MS_MRMhr_DC24_VACV_69C_r2.wiff	69C_r2	SAPMNVDNLIMIV	13	C61H105N15O20S2	SAPM[+16]NVDNLIMIV	SAPM(unimod:35)NVDNLIMIV	SAPM[Oxi]NVDNLIMIV	SAPM[Oxidation (M)]NVDNLIMIV	0	0.9134	#N/A	41.13+/-0.06	#N/A	1431.71	2	716.862	#N/A	41.06	6828	6828	#N/A	6525	6525	#N/A	#N/A	âˆž	VACV			FALSE
20221007_MS_MRMhr_DC24_VACV_69C_r3.wiff	69C_r3	SAPMNVDNLIMIV	13	C61H105N15O20S2	SAPM[+16]NVDNLIMIV	SAPM(unimod:35)NVDNLIMIV	SAPM[Oxi]NVDNLIMIV	SAPM[Oxidation (M)]NVDNLIMIV	0	0.8398	#N/A	41.13+/-0.06	#N/A	1431.71	2	716.862	#N/A	41.06	14322	14322	#N/A	0	0	#N/A	#N/A	âˆž	VACV			FALSE
20221007_MS_MRMhr_DC24_VACV_73C_r1.wiff	73C_r1	SAPMNVDNLIMIV	13	C61H105N15O20S2	SAPM[+16]NVDNLIMIV	SAPM(unimod:35)NVDNLIMIV	SAPM[Oxi]NVDNLIMIV	SAPM[Oxidation (M)]NVDNLIMIV	0	0.8596	#N/A	41.13+/-0.06	#N/A	1431.71	2	716.862	#N/A	41.06	20963	20963	#N/A	0	0	#N/A	#N/A	âˆž	VACV			FALSE
20221007_MS_MRMhr_DC24_VACV_73C_r2.wiff	73C_r2	SAPMNVDNLIMIV	13	C61H105N15O20S2	SAPM[+16]NVDNLIMIV	SAPM(unimod:35)NVDNLIMIV	SAPM[Oxi]NVDNLIMIV	SAPM[Oxidation (M)]NVDNLIMIV	0	0.7778	#N/A	41.13+/-0.06	#N/A	1431.71	2	716.862	#N/A	41.06	23229	23229	#N/A	22215	22215	#N/A	#N/A	âˆž	VACV			FALSE
20221007_MS_MRMhr_DC24_VACV_73C_r3.wiff	73C_r3	SAPMNVDNLIMIV	13	C61H105N15O20S2	SAPM[+16]NVDNLIMIV	SAPM(unimod:35)NVDNLIMIV	SAPM[Oxi]NVDNLIMIV	SAPM[Oxidation (M)]NVDNLIMIV	0	0.8088	#N/A	41.13+/-0.06	#N/A	1431.71	2	716.862	#N/A	41.06	13801	13801	#N/A	16759	16759	#N/A	#N/A	âˆž	VACV			FALSE
20221010_MS_zenoSWATH_DC24_VACV_37C_r1.wiff	SWATH_r1	SAPMNVDNLIMIV	13	C61H105N15O20S2	SAPMNVDNLIM[+16]IV	SAPMNVDNLIM(unimod:35)IV	SAPMNVDNLIM[Oxi]IV	SAPMNVDNLIM[Oxidation (M)]IV	0.947	0.9875	#N/A	42.86+/-0.14	#N/A	1431.71	2	716.862	#N/A	43	52890	33659	19230	0	0	0	#N/A	0.000385	VACV			FALSE
20221010_MS_zenoSWATH_DC24_VACV_37C_r2.wiff	SWATH_r2	SAPMNVDNLIMIV	13	C61H105N15O20S2	SAPMNVDNLIM[+16]IV	SAPMNVDNLIM(unimod:35)IV	SAPMNVDNLIM[Oxi]IV	SAPMNVDNLIM[Oxidation (M)]IV	0.9471	0.9948	#N/A	42.86+/-0.14	#N/A	1431.71	2	716.862	#N/A	43	191112	118321	72791	306	306	0	#N/A	0.00198	VACV			FALSE
20221010_MS_zenoSWATH_DC24_VACV_37C_r3.wiff	SWATH_r3	SAPMNVDNLIMIV	13	C61H105N15O20S2	SAPMNVDNLIM[+16]IV	SAPMNVDNLIM(unimod:35)IV	SAPMNVDNLIM[Oxi]IV	SAPMNVDNLIM[Oxidation (M)]IV	0.8808	0.9875	#N/A	42.86+/-0.14	#N/A	1431.71	2	716.862	#N/A	43	64916	38929	25987	0	0	0	#N/A	0.000569	VACV			FALSE
20221007_MS_MRMhr_DC24_VACV_37C_r1.wiff	37C_r1	SAPMNVDNLIMIV	13	C61H105N15O20S2	SAPMNVDNLIM[+16]IV	SAPMNVDNLIM(unimod:35)IV	SAPMNVDNLIM[Oxi]IV	SAPMNVDNLIM[Oxidation (M)]IV	0	0.9858	#N/A	42.86+/-0.14	#N/A	1431.71	2	716.862	#N/A	43	81007	81007	#N/A	551	551	#N/A	#N/A	0.000684	VACV			FALSE
20221007_MS_MRMhr_DC24_VACV_37C_r2.wiff	37C_r2	SAPMNVDNLIMIV	13	C61H105N15O20S2	SAPMNVDNLIM[+16]IV	SAPMNVDNLIM(unimod:35)IV	SAPMNVDNLIM[Oxi]IV	SAPMNVDNLIM[Oxidation (M)]IV	0	0.9976	#N/A	42.86+/-0.14	#N/A	1431.71	2	716.862	#N/A	43	266792	266792	#N/A	2803	2803	#N/A	#N/A	0.002228	VACV			FALSE
20221007_MS_MRMhr_DC24_VACV_37C_r3.wiff	37C_r3	SAPMNVDNLIMIV	13	C61H105N15O20S2	SAPMNVDNLIM[+16]IV	SAPMNVDNLIM(unimod:35)IV	SAPMNVDNLIM[Oxi]IV	SAPMNVDNLIM[Oxidation (M)]IV	0	0.9886	#N/A	42.86+/-0.14	#N/A	1431.71	2	716.862	#N/A	43	67783	67783	#N/A	397	397	#N/A	#N/A	0.00068	VACV			FALSE
20221007_MS_MRMhr_DC24_VACV_41C_r1.wiff	41C_r1	SAPMNVDNLIMIV	13	C61H105N15O20S2	SAPMNVDNLIM[+16]IV	SAPMNVDNLIM(unimod:35)IV	SAPMNVDNLIM[Oxi]IV	SAPMNVDNLIM[Oxidation (M)]IV	0	0.9929	#N/A	42.86+/-0.14	#N/A	1431.71	2	716.862	#N/A	43	174174	174174	#N/A	1745	1745	#N/A	#N/A	0.002455	VACV			FALSE
20221007_MS_MRMhr_DC24_VACV_41C_r2.wiff	41C_r2	SAPMNVDNLIMIV	13	C61H105N15O20S2	SAPMNVDNLIM[+16]IV	SAPMNVDNLIM(unimod:35)IV	SAPMNVDNLIM[Oxi]IV	SAPMNVDNLIM[Oxidation (M)]IV	0	0.9952	#N/A	42.86+/-0.14	#N/A	1431.71	2	716.862	#N/A	43	327119	327119	#N/A	2094	2094	#N/A	#N/A	0.002884	VACV			FALSE
20221007_MS_MRMhr_DC24_VACV_41C_r3.wiff	41C_r3	SAPMNVDNLIMIV	13	C61H105N15O20S2	SAPMNVDNLIM[+16]IV	SAPMNVDNLIM(unimod:35)IV	SAPMNVDNLIM[Oxi]IV	SAPMNVDNLIM[Oxidation (M)]IV	0	0.9944	#N/A	42.86+/-0.14	#N/A	1431.71	2	716.862	#N/A	43	293875	293875	#N/A	3965	3965	#N/A	#N/A	0.00228	VACV			FALSE
20221007_MS_MRMhr_DC24_VACV_45C_r1.wiff	45C_r1	SAPMNVDNLIMIV	13	C61H105N15O20S2	SAPMNVDNLIM[+16]IV	SAPMNVDNLIM(unimod:35)IV	SAPMNVDNLIM[Oxi]IV	SAPMNVDNLIM[Oxidation (M)]IV	0	0.9963	#N/A	42.86+/-0.14	#N/A	1431.71	2	716.862	#N/A	43	135452	135452	#N/A	2868	2868	#N/A	#N/A	0.001414	VACV			FALSE
20221007_MS_MRMhr_DC24_VACV_45C_r2.wiff	45C_r2	SAPMNVDNLIMIV	13	C61H105N15O20S2	SAPMNVDNLIM[+16]IV	SAPMNVDNLIM(unimod:35)IV	SAPMNVDNLIM[Oxi]IV	SAPMNVDNLIM[Oxidation (M)]IV	0	0.9942	#N/A	42.86+/-0.14	#N/A	1431.71	2	716.862	#N/A	43	210324	210324	#N/A	5560	5560	#N/A	#N/A	0.00206	VACV			FALSE
20221007_MS_MRMhr_DC24_VACV_45C_r3.wiff	45C_r3	SAPMNVDNLIMIV	13	C61H105N15O20S2	SAPMNVDNLIM[+16]IV	SAPMNVDNLIM(unimod:35)IV	SAPMNVDNLIM[Oxi]IV	SAPMNVDNLIM[Oxidation (M)]IV	0	0.9936	#N/A	42.86+/-0.14	#N/A	1431.71	2	716.862	#N/A	43	149571	149571	#N/A	3750	3750	#N/A	#N/A	0.001356	VACV			FALSE
20221007_MS_MRMhr_DC24_VACV_49C_r1.wiff	49C_r1	SAPMNVDNLIMIV	13	C61H105N15O20S2	SAPMNVDNLIM[+16]IV	SAPMNVDNLIM(unimod:35)IV	SAPMNVDNLIM[Oxi]IV	SAPMNVDNLIM[Oxidation (M)]IV	0	0.9891	#N/A	42.86+/-0.14	#N/A	1431.71	2	716.862	#N/A	43	113787	113787	#N/A	2316	2316	#N/A	#N/A	0.001889	VACV			FALSE
20221007_MS_MRMhr_DC24_VACV_49C_r2.wiff	49C_r2	SAPMNVDNLIMIV	13	C61H105N15O20S2	SAPMNVDNLIM[+16]IV	SAPMNVDNLIM(unimod:35)IV	SAPMNVDNLIM[Oxi]IV	SAPMNVDNLIM[Oxidation (M)]IV	0	0.9971	#N/A	42.86+/-0.14	#N/A	1431.71	2	716.862	#N/A	43	75073	75073	#N/A	399	399	#N/A	#N/A	0.000974	VACV			FALSE
20221007_MS_MRMhr_DC24_VACV_49C_r3.wiff	49C_r3	SAPMNVDNLIMIV	13	C61H105N15O20S2	SAPMNVDNLIM[+16]IV	SAPMNVDNLIM(unimod:35)IV	SAPMNVDNLIM[Oxi]IV	SAPMNVDNLIM[Oxidation (M)]IV	0	0.9966	#N/A	42.86+/-0.14	#N/A	1431.71	2	716.862	#N/A	43	80256	80256	#N/A	1086	1086	#N/A	#N/A	0.001298	VACV			FALSE
20221007_MS_MRMhr_DC24_VACV_53C_r1.wiff	53C_r1	SAPMNVDNLIMIV	13	C61H105N15O20S2	SAPMNVDNLIM[+16]IV	SAPMNVDNLIM(unimod:35)IV	SAPMNVDNLIM[Oxi]IV	SAPMNVDNLIM[Oxidation (M)]IV	0	0.9821	#N/A	42.86+/-0.14	#N/A	1431.71	2	716.862	#N/A	43	19273	19273	#N/A	132	132	#N/A	#N/A	0.000324	VACV			FALSE
20221007_MS_MRMhr_DC24_VACV_53C_r2.wiff	53C_r2	SAPMNVDNLIMIV	13	C61H105N15O20S2	SAPMNVDNLIM[+16]IV	SAPMNVDNLIM(unimod:35)IV	SAPMNVDNLIM[Oxi]IV	SAPMNVDNLIM[Oxidation (M)]IV	0	0.982	#N/A	42.86+/-0.14	#N/A	1431.71	2	716.862	#N/A	43	28283	28283	#N/A	0	0	#N/A	#N/A	0.000661	VACV			FALSE
20221007_MS_MRMhr_DC24_VACV_53C_r3.wiff	53C_r3	SAPMNVDNLIMIV	13	C61H105N15O20S2	SAPMNVDNLIM[+16]IV	SAPMNVDNLIM(unimod:35)IV	SAPMNVDNLIM[Oxi]IV	SAPMNVDNLIM[Oxidation (M)]IV	0	0.9797	#N/A	42.86+/-0.14	#N/A	1431.71	2	716.862	#N/A	43	24049	24049	#N/A	478	478	#N/A	#N/A	0.000438	VACV			FALSE
20221007_MS_MRMhr_DC24_VACV_57C_r1.wiff	57C_r1	SAPMNVDNLIMIV	13	C61H105N15O20S2	SAPMNVDNLIM[+16]IV	SAPMNVDNLIM(unimod:35)IV	SAPMNVDNLIM[Oxi]IV	SAPMNVDNLIM[Oxidation (M)]IV	0	0.9084	#N/A	42.86+/-0.14	#N/A	1431.71	2	716.862	#N/A	43	24955	24955	#N/A	1362	1362	#N/A	#N/A	0.000755	VACV			FALSE
20221007_MS_MRMhr_DC24_VACV_57C_r2.wiff	57C_r2	SAPMNVDNLIMIV	13	C61H105N15O20S2	SAPMNVDNLIM[+16]IV	SAPMNVDNLIM(unimod:35)IV	SAPMNVDNLIM[Oxi]IV	SAPMNVDNLIM[Oxidation (M)]IV	0	0.9168	#N/A	42.86+/-0.14	#N/A	1431.71	2	716.862	#N/A	43	21743	21743	#N/A	0	0	#N/A	#N/A	0.000703	VACV			FALSE
20221007_MS_MRMhr_DC24_VACV_57C_r3.wiff	57C_r3	SAPMNVDNLIMIV	13	C61H105N15O20S2	SAPMNVDNLIM[+16]IV	SAPMNVDNLIM(unimod:35)IV	SAPMNVDNLIM[Oxi]IV	SAPMNVDNLIM[Oxidation (M)]IV	0	0.8915	#N/A	42.86+/-0.14	#N/A	1431.71	2	716.862	#N/A	43	32892	32892	#N/A	0	0	#N/A	#N/A	0.001246	VACV			FALSE
20221007_MS_MRMhr_DC24_VACV_61C_r1.wiff	61C_r1	SAPMNVDNLIMIV	13	C61H105N15O20S2	SAPMNVDNLIM[+16]IV	SAPMNVDNLIM(unimod:35)IV	SAPMNVDNLIM[Oxi]IV	SAPMNVDNLIM[Oxidation (M)]IV	0	0.8583	#N/A	42.86+/-0.14	#N/A	1431.71	2	716.862	#N/A	43	18510	18510	#N/A	0	0	#N/A	#N/A	0.000873	VACV			FALSE
20221007_MS_MRMhr_DC24_VACV_61C_r2.wiff	61C_r2	SAPMNVDNLIMIV	13	C61H105N15O20S2	SAPMNVDNLIM[+16]IV	SAPMNVDNLIM(unimod:35)IV	SAPMNVDNLIM[Oxi]IV	SAPMNVDNLIM[Oxidation (M)]IV	0	0.8388	#N/A	42.86+/-0.14	#N/A	1431.71	2	716.862	#N/A	43	15889	15889	#N/A	0	0	#N/A	#N/A	0.000762	VACV			FALSE
20221007_MS_MRMhr_DC24_VACV_61C_r3.wiff	61C_r3	SAPMNVDNLIMIV	13	C61H105N15O20S2	SAPMNVDNLIM[+16]IV	SAPMNVDNLIM(unimod:35)IV	SAPMNVDNLIM[Oxi]IV	SAPMNVDNLIM[Oxidation (M)]IV	0	0.9144	#N/A	42.86+/-0.14	#N/A	1431.71	2	716.862	#N/A	43	23637	23637	#N/A	0	0	#N/A	#N/A	0.001014	VACV			FALSE
20221007_MS_MRMhr_DC24_VACV_65C_r1.wiff	65C_r1	SAPMNVDNLIMIV	13	C61H105N15O20S2	SAPMNVDNLIM[+16]IV	SAPMNVDNLIM(unimod:35)IV	SAPMNVDNLIM[Oxi]IV	SAPMNVDNLIM[Oxidation (M)]IV	0	0.8488	#N/A	42.86+/-0.14	#N/A	1431.71	2	716.862	#N/A	43	21974	21974	#N/A	0	0	#N/A	#N/A	âˆž	VACV			FALSE
20221007_MS_MRMhr_DC24_VACV_65C_r2.wiff	65C_r2	SAPMNVDNLIMIV	13	C61H105N15O20S2	SAPMNVDNLIM[+16]IV	SAPMNVDNLIM(unimod:35)IV	SAPMNVDNLIM[Oxi]IV	SAPMNVDNLIM[Oxidation (M)]IV	0	0.8656	#N/A	42.86+/-0.14	#N/A	1431.71	2	716.862	#N/A	43	9347	9347	#N/A	0	0	#N/A	#N/A	âˆž	VACV			FALSE
20221007_MS_MRMhr_DC24_VACV_69C_r1.wiff	69C_r1	SAPMNVDNLIMIV	13	C61H105N15O20S2	SAPMNVDNLIM[+16]IV	SAPMNVDNLIM(unimod:35)IV	SAPMNVDNLIM[Oxi]IV	SAPMNVDNLIM[Oxidation (M)]IV	0	0.8393	#N/A	42.86+/-0.14	#N/A	1431.71	2	716.862	#N/A	43	18483	18483	#N/A	2296	2296	#N/A	#N/A	âˆž	VACV			FALSE
20221007_MS_MRMhr_DC24_VACV_69C_r2.wiff	69C_r2	SAPMNVDNLIMIV	13	C61H105N15O20S2	SAPMNVDNLIM[+16]IV	SAPMNVDNLIM(unimod:35)IV	SAPMNVDNLIM[Oxi]IV	SAPMNVDNLIM[Oxidation (M)]IV	0	0.8856	#N/A	42.86+/-0.14	#N/A	1431.71	2	716.862	#N/A	43	14452	14452	#N/A	8265	8265	#N/A	#N/A	âˆž	VACV			FALSE
20221007_MS_MRMhr_DC24_VACV_69C_r3.wiff	69C_r3	SAPMNVDNLIMIV	13	C61H105N15O20S2	SAPMNVDNLIM[+16]IV	SAPMNVDNLIM(unimod:35)IV	SAPMNVDNLIM[Oxi]IV	SAPMNVDNLIM[Oxidation (M)]IV	0	0.8107	#N/A	42.86+/-0.14	#N/A	1431.71	2	716.862	#N/A	43	23997	23997	#N/A	1203	1203	#N/A	#N/A	âˆž	VACV			FALSE
20221007_MS_MRMhr_DC24_VACV_73C_r1.wiff	73C_r1	SAPMNVDNLIMIV	13	C61H105N15O20S2	SAPMNVDNLIM[+16]IV	SAPMNVDNLIM(unimod:35)IV	SAPMNVDNLIM[Oxi]IV	SAPMNVDNLIM[Oxidation (M)]IV	0	0.8607	#N/A	42.86+/-0.14	#N/A	1431.71	2	716.862	#N/A	43	26415	26415	#N/A	0	0	#N/A	#N/A	âˆž	VACV			FALSE
20221007_MS_MRMhr_DC24_VACV_73C_r2.wiff	73C_r2	SAPMNVDNLIMIV	13	C61H105N15O20S2	SAPMNVDNLIM[+16]IV	SAPMNVDNLIM(unimod:35)IV	SAPMNVDNLIM[Oxi]IV	SAPMNVDNLIM[Oxidation (M)]IV	0	0.8743	#N/A	42.86+/-0.14	#N/A	1431.71	2	716.862	#N/A	43	25500	25500	#N/A	6222	6222	#N/A	#N/A	âˆž	VACV			FALSE
20221007_MS_MRMhr_DC24_VACV_73C_r3.wiff	73C_r3	SAPMNVDNLIMIV	13	C61H105N15O20S2	SAPMNVDNLIM[+16]IV	SAPMNVDNLIM(unimod:35)IV	SAPMNVDNLIM[Oxi]IV	SAPMNVDNLIM[Oxidation (M)]IV	0	0.8305	#N/A	42.86+/-0.14	#N/A	1431.71	2	716.862	#N/A	43	40333	40333	#N/A	0	0	#N/A	#N/A	âˆž	VACV			FALSE
20221010_MS_zenoSWATH_DC24_VACV_37C_r1.wiff	SWATH_r1	SAPMNVDNLIMIV	13	C61H105N15O21S2	SAPM[+16]NVDNLIM[+16]IV	SAPM(unimod:35)NVDNLIM(unimod:35)IV	SAPM[Oxi]NVDNLIM[Oxi]IV	SAPM[Oxidation (M)]NVDNLIM[Oxidation (M)]IV	0.9471	0.9945	#N/A	38.03+/-0.06	#N/A	1447.71	2	724.86	#N/A	38.09	1412769	783682	629088	3440	2848	592	#N/A	0.010294	VACV			FALSE
20221010_MS_zenoSWATH_DC24_VACV_37C_r2.wiff	SWATH_r2	SAPMNVDNLIMIV	13	C61H105N15O21S2	SAPM[+16]NVDNLIM[+16]IV	SAPM(unimod:35)NVDNLIM(unimod:35)IV	SAPM[Oxi]NVDNLIM[Oxi]IV	SAPM[Oxidation (M)]NVDNLIM[Oxidation (M)]IV	0.9339	0.9963	#N/A	38.03+/-0.06	#N/A	1447.71	2	724.86	#N/A	38.09	332205	184821	147384	285	285	0	#N/A	0.003442	VACV			FALSE
20221010_MS_zenoSWATH_DC24_VACV_37C_r3.wiff	SWATH_r3	SAPMNVDNLIMIV	13	C61H105N15O21S2	SAPM[+16]NVDNLIM[+16]IV	SAPM(unimod:35)NVDNLIM(unimod:35)IV	SAPM[Oxi]NVDNLIM[Oxi]IV	SAPM[Oxidation (M)]NVDNLIM[Oxidation (M)]IV	0.9464	0.9971	#N/A	38.03+/-0.06	#N/A	1447.71	2	724.86	#N/A	38.09	1335256	738862	596394	4539	4539	0	#N/A	0.011697	VACV			FALSE
20221007_MS_MRMhr_DC24_VACV_37C_r1.wiff	37C_r1	SAPMNVDNLIMIV	13	C61H105N15O21S2	SAPM[+16]NVDNLIM[+16]IV	SAPM(unimod:35)NVDNLIM(unimod:35)IV	SAPM[Oxi]NVDNLIM[Oxi]IV	SAPM[Oxidation (M)]NVDNLIM[Oxidation (M)]IV	0	0.9992	#N/A	38.03+/-0.06	#N/A	1447.71	2	724.86	#N/A	38.09	1140461	1140461	#N/A	6172	6172	#N/A	#N/A	0.009628	VACV			FALSE
20221007_MS_MRMhr_DC24_VACV_37C_r2.wiff	37C_r2	SAPMNVDNLIMIV	13	C61H105N15O21S2	SAPM[+16]NVDNLIM[+16]IV	SAPM(unimod:35)NVDNLIM(unimod:35)IV	SAPM[Oxi]NVDNLIM[Oxi]IV	SAPM[Oxidation (M)]NVDNLIM[Oxidation (M)]IV	0	0.9972	#N/A	38.03+/-0.06	#N/A	1447.71	2	724.86	#N/A	38.09	323050	323050	#N/A	2263	2263	#N/A	#N/A	0.002698	VACV			FALSE
20221007_MS_MRMhr_DC24_VACV_37C_r3.wiff	37C_r3	SAPMNVDNLIMIV	13	C61H105N15O21S2	SAPM[+16]NVDNLIM[+16]IV	SAPM(unimod:35)NVDNLIM(unimod:35)IV	SAPM[Oxi]NVDNLIM[Oxi]IV	SAPM[Oxidation (M)]NVDNLIM[Oxidation (M)]IV	0	0.9996	#N/A	38.03+/-0.06	#N/A	1447.71	2	724.86	#N/A	38.09	1026542	1026542	#N/A	1322	1322	#N/A	#N/A	0.010292	VACV			FALSE
20221007_MS_MRMhr_DC24_VACV_41C_r1.wiff	41C_r1	SAPMNVDNLIMIV	13	C61H105N15O21S2	SAPM[+16]NVDNLIM[+16]IV	SAPM(unimod:35)NVDNLIM(unimod:35)IV	SAPM[Oxi]NVDNLIM[Oxi]IV	SAPM[Oxidation (M)]NVDNLIM[Oxidation (M)]IV	0	0.9963	#N/A	38.03+/-0.06	#N/A	1447.71	2	724.86	#N/A	38.09	697531	697531	#N/A	1872	1872	#N/A	#N/A	0.00983	VACV			FALSE
20221007_MS_MRMhr_DC24_VACV_41C_r2.wiff	41C_r2	SAPMNVDNLIMIV	13	C61H105N15O21S2	SAPM[+16]NVDNLIM[+16]IV	SAPM(unimod:35)NVDNLIM(unimod:35)IV	SAPM[Oxi]NVDNLIM[Oxi]IV	SAPM[Oxidation (M)]NVDNLIM[Oxidation (M)]IV	0	0.9976	#N/A	38.03+/-0.06	#N/A	1447.71	2	724.86	#N/A	38.09	1252645	1252645	#N/A	802	802	#N/A	#N/A	0.011045	VACV			FALSE
20221007_MS_MRMhr_DC24_VACV_41C_r3.wiff	41C_r3	SAPMNVDNLIMIV	13	C61H105N15O21S2	SAPM[+16]NVDNLIM[+16]IV	SAPM(unimod:35)NVDNLIM(unimod:35)IV	SAPM[Oxi]NVDNLIM[Oxi]IV	SAPM[Oxidation (M)]NVDNLIM[Oxidation (M)]IV	0	0.998	#N/A	38.03+/-0.06	#N/A	1447.71	2	724.86	#N/A	38.09	1481608	1481608	#N/A	4459	4459	#N/A	#N/A	0.011497	VACV			FALSE
20221007_MS_MRMhr_DC24_VACV_45C_r1.wiff	45C_r1	SAPMNVDNLIMIV	13	C61H105N15O21S2	SAPM[+16]NVDNLIM[+16]IV	SAPM(unimod:35)NVDNLIM(unimod:35)IV	SAPM[Oxi]NVDNLIM[Oxi]IV	SAPM[Oxidation (M)]NVDNLIM[Oxidation (M)]IV	0	0.9982	#N/A	38.03+/-0.06	#N/A	1447.71	2	724.86	#N/A	38.09	1011510	1011510	#N/A	5029	5029	#N/A	#N/A	0.010557	VACV			FALSE
20221007_MS_MRMhr_DC24_VACV_45C_r2.wiff	45C_r2	SAPMNVDNLIMIV	13	C61H105N15O21S2	SAPM[+16]NVDNLIM[+16]IV	SAPM(unimod:35)NVDNLIM(unimod:35)IV	SAPM[Oxi]NVDNLIM[Oxi]IV	SAPM[Oxidation (M)]NVDNLIM[Oxidation (M)]IV	0	0.9967	#N/A	38.03+/-0.06	#N/A	1447.71	2	724.86	#N/A	38.09	767309	767309	#N/A	1642	1642	#N/A	#N/A	0.007516	VACV			FALSE
20221007_MS_MRMhr_DC24_VACV_45C_r3.wiff	45C_r3	SAPMNVDNLIMIV	13	C61H105N15O21S2	SAPM[+16]NVDNLIM[+16]IV	SAPM(unimod:35)NVDNLIM(unimod:35)IV	SAPM[Oxi]NVDNLIM[Oxi]IV	SAPM[Oxidation (M)]NVDNLIM[Oxidation (M)]IV	0	0.996	#N/A	38.03+/-0.06	#N/A	1447.71	2	724.86	#N/A	38.09	877712	877712	#N/A	5750	5750	#N/A	#N/A	0.007957	VACV			FALSE
20221007_MS_MRMhr_DC24_VACV_49C_r1.wiff	49C_r1	SAPMNVDNLIMIV	13	C61H105N15O21S2	SAPM[+16]NVDNLIM[+16]IV	SAPM(unimod:35)NVDNLIM(unimod:35)IV	SAPM[Oxi]NVDNLIM[Oxi]IV	SAPM[Oxidation (M)]NVDNLIM[Oxidation (M)]IV	0	0.9904	#N/A	38.03+/-0.06	#N/A	1447.71	2	724.86	#N/A	38.09	165831	165831	#N/A	2952	2952	#N/A	#N/A	0.002753	VACV			FALSE
20221007_MS_MRMhr_DC24_VACV_49C_r2.wiff	49C_r2	SAPMNVDNLIMIV	13	C61H105N15O21S2	SAPM[+16]NVDNLIM[+16]IV	SAPM(unimod:35)NVDNLIM(unimod:35)IV	SAPM[Oxi]NVDNLIM[Oxi]IV	SAPM[Oxidation (M)]NVDNLIM[Oxidation (M)]IV	0	0.9964	#N/A	38.03+/-0.06	#N/A	1447.71	2	724.86	#N/A	38.09	413186	413186	#N/A	1182	1182	#N/A	#N/A	0.005363	VACV			FALSE
20221007_MS_MRMhr_DC24_VACV_49C_r3.wiff	49C_r3	SAPMNVDNLIMIV	13	C61H105N15O21S2	SAPM[+16]NVDNLIM[+16]IV	SAPM(unimod:35)NVDNLIM(unimod:35)IV	SAPM[Oxi]NVDNLIM[Oxi]IV	SAPM[Oxidation (M)]NVDNLIM[Oxidation (M)]IV	0	0.9983	#N/A	38.03+/-0.06	#N/A	1447.71	2	724.86	#N/A	38.09	325762	325762	#N/A	185	185	#N/A	#N/A	0.005269	VACV			FALSE
20221007_MS_MRMhr_DC24_VACV_53C_r1.wiff	53C_r1	SAPMNVDNLIMIV	13	C61H105N15O21S2	SAPM[+16]NVDNLIM[+16]IV	SAPM(unimod:35)NVDNLIM(unimod:35)IV	SAPM[Oxi]NVDNLIM[Oxi]IV	SAPM[Oxidation (M)]NVDNLIM[Oxidation (M)]IV	0	0.9961	#N/A	38.03+/-0.06	#N/A	1447.71	2	724.86	#N/A	38.09	178413	178413	#N/A	0	0	#N/A	#N/A	0.003001	VACV			FALSE
20221007_MS_MRMhr_DC24_VACV_53C_r2.wiff	53C_r2	SAPMNVDNLIMIV	13	C61H105N15O21S2	SAPM[+16]NVDNLIM[+16]IV	SAPM(unimod:35)NVDNLIM(unimod:35)IV	SAPM[Oxi]NVDNLIM[Oxi]IV	SAPM[Oxidation (M)]NVDNLIM[Oxidation (M)]IV	0	0.996	#N/A	38.03+/-0.06	#N/A	1447.71	2	724.86	#N/A	38.09	202237	202237	#N/A	1267	1267	#N/A	#N/A	0.004723	VACV			FALSE
20221007_MS_MRMhr_DC24_VACV_53C_r3.wiff	53C_r3	SAPMNVDNLIMIV	13	C61H105N15O21S2	SAPM[+16]NVDNLIM[+16]IV	SAPM(unimod:35)NVDNLIM(unimod:35)IV	SAPM[Oxi]NVDNLIM[Oxi]IV	SAPM[Oxidation (M)]NVDNLIM[Oxidation (M)]IV	0	0.9977	#N/A	38.03+/-0.06	#N/A	1447.71	2	724.86	#N/A	38.09	291433	291433	#N/A	1371	1371	#N/A	#N/A	0.005306	VACV			FALSE
20221007_MS_MRMhr_DC24_VACV_57C_r1.wiff	57C_r1	SAPMNVDNLIMIV	13	C61H105N15O21S2	SAPM[+16]NVDNLIM[+16]IV	SAPM(unimod:35)NVDNLIM(unimod:35)IV	SAPM[Oxi]NVDNLIM[Oxi]IV	SAPM[Oxidation (M)]NVDNLIM[Oxidation (M)]IV	0	0.9404	#N/A	38.03+/-0.06	#N/A	1447.71	2	724.86	#N/A	38.09	20112	20112	#N/A	4515	4515	#N/A	#N/A	0.000608	VACV			FALSE
20221007_MS_MRMhr_DC24_VACV_57C_r2.wiff	57C_r2	SAPMNVDNLIMIV	13	C61H105N15O21S2	SAPM[+16]NVDNLIM[+16]IV	SAPM(unimod:35)NVDNLIM(unimod:35)IV	SAPM[Oxi]NVDNLIM[Oxi]IV	SAPM[Oxidation (M)]NVDNLIM[Oxidation (M)]IV	0	0.9649	#N/A	38.03+/-0.06	#N/A	1447.71	2	724.86	#N/A	38.09	46244	46244	#N/A	9681	9681	#N/A	#N/A	0.001495	VACV			FALSE
20221007_MS_MRMhr_DC24_VACV_57C_r3.wiff	57C_r3	SAPMNVDNLIMIV	13	C61H105N15O21S2	SAPM[+16]NVDNLIM[+16]IV	SAPM(unimod:35)NVDNLIM(unimod:35)IV	SAPM[Oxi]NVDNLIM[Oxi]IV	SAPM[Oxidation (M)]NVDNLIM[Oxidation (M)]IV	0	0.8882	#N/A	38.03+/-0.06	#N/A	1447.71	2	724.86	#N/A	38.09	29849	29849	#N/A	0	0	#N/A	#N/A	0.001131	VACV			FALSE
20221007_MS_MRMhr_DC24_VACV_61C_r1.wiff	61C_r1	SAPMNVDNLIMIV	13	C61H105N15O21S2	SAPM[+16]NVDNLIM[+16]IV	SAPM(unimod:35)NVDNLIM(unimod:35)IV	SAPM[Oxi]NVDNLIM[Oxi]IV	SAPM[Oxidation (M)]NVDNLIM[Oxidation (M)]IV	0	0.819	#N/A	38.03+/-0.06	#N/A	1447.71	2	724.86	#N/A	38.09	17139	17139	#N/A	0	0	#N/A	#N/A	0.000808	VACV			FALSE
20221007_MS_MRMhr_DC24_VACV_61C_r2.wiff	61C_r2	SAPMNVDNLIMIV	13	C61H105N15O21S2	SAPM[+16]NVDNLIM[+16]IV	SAPM(unimod:35)NVDNLIM(unimod:35)IV	SAPM[Oxi]NVDNLIM[Oxi]IV	SAPM[Oxidation (M)]NVDNLIM[Oxidation (M)]IV	0	0.753	#N/A	38.03+/-0.06	#N/A	1447.71	2	724.86	#N/A	38.09	16924	16924	#N/A	12903	12903	#N/A	#N/A	0.000811	VACV			FALSE
20221007_MS_MRMhr_DC24_VACV_61C_r3.wiff	61C_r3	SAPMNVDNLIMIV	13	C61H105N15O21S2	SAPM[+16]NVDNLIM[+16]IV	SAPM(unimod:35)NVDNLIM(unimod:35)IV	SAPM[Oxi]NVDNLIM[Oxi]IV	SAPM[Oxidation (M)]NVDNLIM[Oxidation (M)]IV	0	0.73	#N/A	38.03+/-0.06	#N/A	1447.71	2	724.86	#N/A	38.09	19809	19809	#N/A	5534	5534	#N/A	#N/A	0.00085	VACV			FALSE
20221007_MS_MRMhr_DC24_VACV_65C_r1.wiff	65C_r1	SAPMNVDNLIMIV	13	C61H105N15O21S2	SAPM[+16]NVDNLIM[+16]IV	SAPM(unimod:35)NVDNLIM(unimod:35)IV	SAPM[Oxi]NVDNLIM[Oxi]IV	SAPM[Oxidation (M)]NVDNLIM[Oxidation (M)]IV	0	0.8649	#N/A	38.03+/-0.06	#N/A	1447.71	2	724.86	#N/A	38.09	28289	28289	#N/A	3772	3772	#N/A	#N/A	âˆž	VACV			FALSE
20221007_MS_MRMhr_DC24_VACV_65C_r2.wiff	65C_r2	SAPMNVDNLIMIV	13	C61H105N15O21S2	SAPM[+16]NVDNLIM[+16]IV	SAPM(unimod:35)NVDNLIM(unimod:35)IV	SAPM[Oxi]NVDNLIM[Oxi]IV	SAPM[Oxidation (M)]NVDNLIM[Oxidation (M)]IV	0	0.9011	#N/A	38.03+/-0.06	#N/A	1447.71	2	724.86	#N/A	38.09	14751	14751	#N/A	544	544	#N/A	#N/A	âˆž	VACV			FALSE
20221007_MS_MRMhr_DC24_VACV_69C_r1.wiff	69C_r1	SAPMNVDNLIMIV	13	C61H105N15O21S2	SAPM[+16]NVDNLIM[+16]IV	SAPM(unimod:35)NVDNLIM(unimod:35)IV	SAPM[Oxi]NVDNLIM[Oxi]IV	SAPM[Oxidation (M)]NVDNLIM[Oxidation (M)]IV	0	0.8414	#N/A	38.03+/-0.06	#N/A	1447.71	2	724.86	#N/A	38.09	24483	24483	#N/A	360	360	#N/A	#N/A	âˆž	VACV			FALSE
20221007_MS_MRMhr_DC24_VACV_69C_r2.wiff	69C_r2	SAPMNVDNLIMIV	13	C61H105N15O21S2	SAPM[+16]NVDNLIM[+16]IV	SAPM(unimod:35)NVDNLIM(unimod:35)IV	SAPM[Oxi]NVDNLIM[Oxi]IV	SAPM[Oxidation (M)]NVDNLIM[Oxidation (M)]IV	0	0.9308	#N/A	38.03+/-0.06	#N/A	1447.71	2	724.86	#N/A	38.09	15345	15345	#N/A	8837	8837	#N/A	#N/A	âˆž	VACV			FALSE
20221007_MS_MRMhr_DC24_VACV_69C_r3.wiff	69C_r3	SAPMNVDNLIMIV	13	C61H105N15O21S2	SAPM[+16]NVDNLIM[+16]IV	SAPM(unimod:35)NVDNLIM(unimod:35)IV	SAPM[Oxi]NVDNLIM[Oxi]IV	SAPM[Oxidation (M)]NVDNLIM[Oxidation (M)]IV	0	0.911	#N/A	38.03+/-0.06	#N/A	1447.71	2	724.86	#N/A	38.09	26836	26836	#N/A	0	0	#N/A	#N/A	âˆž	VACV			FALSE
20221007_MS_MRMhr_DC24_VACV_73C_r1.wiff	73C_r1	SAPMNVDNLIMIV	13	C61H105N15O21S2	SAPM[+16]NVDNLIM[+16]IV	SAPM(unimod:35)NVDNLIM(unimod:35)IV	SAPM[Oxi]NVDNLIM[Oxi]IV	SAPM[Oxidation (M)]NVDNLIM[Oxidation (M)]IV	0	0.9201	#N/A	38.03+/-0.06	#N/A	1447.71	2	724.86	#N/A	38.09	20617	20617	#N/A	0	0	#N/A	#N/A	âˆž	VACV			FALSE
20221007_MS_MRMhr_DC24_VACV_73C_r2.wiff	73C_r2	SAPMNVDNLIMIV	13	C61H105N15O21S2	SAPM[+16]NVDNLIM[+16]IV	SAPM(unimod:35)NVDNLIM(unimod:35)IV	SAPM[Oxi]NVDNLIM[Oxi]IV	SAPM[Oxidation (M)]NVDNLIM[Oxidation (M)]IV	0	0.8197	#N/A	38.03+/-0.06	#N/A	1447.71	2	724.86	#N/A	38.09	33651	33651	#N/A	0	0	#N/A	#N/A	âˆž	VACV			FALSE
20221007_MS_MRMhr_DC24_VACV_73C_r3.wiff	73C_r3	SAPMNVDNLIMIV	13	C61H105N15O21S2	SAPM[+16]NVDNLIM[+16]IV	SAPM(unimod:35)NVDNLIM(unimod:35)IV	SAPM[Oxi]NVDNLIM[Oxi]IV	SAPM[Oxidation (M)]NVDNLIM[Oxidation (M)]IV	0	0.806	#N/A	38.03+/-0.06	#N/A	1447.71	2	724.86	#N/A	38.09	34505	34505	#N/A	0	0	#N/A	#N/A	âˆž	VACV			FALSE
20221010_MS_zenoSWATH_DC24_VACV_37C_r1.wiff	SWATH_r1	FKLILAEYI	9	C56H88N10O13	FKLILAEYI	FKLILAEYI	FKLILAEYI	FKLILAEYI	0.98	0.9939	#N/A	41.09+/-0.04	#N/A	1108.65	2	555.334	#N/A	41.13	490462	182455	308007	783	783	0	#N/A	0.003574	VACV			FALSE
20221010_MS_zenoSWATH_DC24_VACV_37C_r2.wiff	SWATH_r2	FKLILAEYI	9	C56H88N10O13	FKLILAEYI	FKLILAEYI	FKLILAEYI	FKLILAEYI	0.974	0.9933	#N/A	41.09+/-0.04	#N/A	1108.65	2	555.334	#N/A	41.13	294418	112722	181696	234	234	0	#N/A	0.003051	VACV			FALSE
20221010_MS_zenoSWATH_DC24_VACV_37C_r3.wiff	SWATH_r3	FKLILAEYI	9	C56H88N10O13	FKLILAEYI	FKLILAEYI	FKLILAEYI	FKLILAEYI	0.9743	0.9945	#N/A	41.09+/-0.04	#N/A	1108.65	2	555.334	#N/A	41.13	246961	93748	153213	763	763	0	#N/A	0.002163	VACV			FALSE
20221007_MS_MRMhr_DC24_VACV_37C_r1.wiff	37C_r1	FKLILAEYI	9	C56H88N10O13	FKLILAEYI	FKLILAEYI	FKLILAEYI	FKLILAEYI	0.9507	0.9956	#N/A	41.09+/-0.04	#N/A	1108.65	2	555.334	#N/A	41.13	654480	324377	330103	5687	5687	0	#N/A	0.005525	VACV			FALSE
20221007_MS_MRMhr_DC24_VACV_37C_r2.wiff	37C_r2	FKLILAEYI	9	C56H88N10O13	FKLILAEYI	FKLILAEYI	FKLILAEYI	FKLILAEYI	0.9647	0.9975	#N/A	41.09+/-0.04	#N/A	1108.65	2	555.334	#N/A	41.13	527932	246725	281207	1658	1658	0	#N/A	0.004409	VACV			FALSE
20221007_MS_MRMhr_DC24_VACV_37C_r3.wiff	37C_r3	FKLILAEYI	9	C56H88N10O13	FKLILAEYI	FKLILAEYI	FKLILAEYI	FKLILAEYI	0.9615	0.9939	#N/A	41.09+/-0.04	#N/A	1108.65	2	555.334	#N/A	41.13	286084	141452	144632	149	149	0	#N/A	0.002868	VACV			FALSE
20221007_MS_MRMhr_DC24_VACV_41C_r1.wiff	41C_r1	FKLILAEYI	9	C56H88N10O13	FKLILAEYI	FKLILAEYI	FKLILAEYI	FKLILAEYI	0.8903	0.9914	#N/A	41.09+/-0.04	#N/A	1108.65	2	555.334	#N/A	41.13	33625	18908	14717	99	99	0	#N/A	0.000474	VACV			FALSE
20221007_MS_MRMhr_DC24_VACV_41C_r2.wiff	41C_r2	FKLILAEYI	9	C56H88N10O13	FKLILAEYI	FKLILAEYI	FKLILAEYI	FKLILAEYI	0.9586	0.9949	#N/A	41.09+/-0.04	#N/A	1108.65	2	555.334	#N/A	41.13	287505	133621	153884	22	22	0	#N/A	0.002535	VACV			FALSE
20221007_MS_MRMhr_DC24_VACV_41C_r3.wiff	41C_r3	FKLILAEYI	9	C56H88N10O13	FKLILAEYI	FKLILAEYI	FKLILAEYI	FKLILAEYI	0.9628	0.9941	#N/A	41.09+/-0.04	#N/A	1108.65	2	555.334	#N/A	41.13	528626	258309	270316	460	460	0	#N/A	0.004102	VACV			FALSE
20221007_MS_MRMhr_DC24_VACV_45C_r1.wiff	45C_r1	FKLILAEYI	9	C56H88N10O13	FKLILAEYI	FKLILAEYI	FKLILAEYI	FKLILAEYI	0.9721	0.9948	#N/A	41.09+/-0.04	#N/A	1108.65	2	555.334	#N/A	41.13	394583	194061	200523	1148	1148	0	#N/A	0.004118	VACV			FALSE
20221007_MS_MRMhr_DC24_VACV_45C_r2.wiff	45C_r2	FKLILAEYI	9	C56H88N10O13	FKLILAEYI	FKLILAEYI	FKLILAEYI	FKLILAEYI	0.9607	0.9956	#N/A	41.09+/-0.04	#N/A	1108.65	2	555.334	#N/A	41.13	417571	198779	218792	400	400	0	#N/A	0.00409	VACV			FALSE
20221007_MS_MRMhr_DC24_VACV_45C_r3.wiff	45C_r3	FKLILAEYI	9	C56H88N10O13	FKLILAEYI	FKLILAEYI	FKLILAEYI	FKLILAEYI	0.9509	0.9984	#N/A	41.09+/-0.04	#N/A	1108.65	2	555.334	#N/A	41.13	449931	223188	226743	1863	1863	0	#N/A	0.004079	VACV			FALSE
20221007_MS_MRMhr_DC24_VACV_49C_r1.wiff	49C_r1	FKLILAEYI	9	C56H88N10O13	FKLILAEYI	FKLILAEYI	FKLILAEYI	FKLILAEYI	0.9629	0.9959	#N/A	41.09+/-0.04	#N/A	1108.65	2	555.334	#N/A	41.13	116418	61845	54573	697	697	0	#N/A	0.001933	VACV			FALSE
20221007_MS_MRMhr_DC24_VACV_49C_r2.wiff	49C_r2	FKLILAEYI	9	C56H88N10O13	FKLILAEYI	FKLILAEYI	FKLILAEYI	FKLILAEYI	0.8885	0.9907	#N/A	41.09+/-0.04	#N/A	1108.65	2	555.334	#N/A	41.13	102014	50587	51428	879	879	0	#N/A	0.001324	VACV			FALSE
20221007_MS_MRMhr_DC24_VACV_49C_r3.wiff	49C_r3	FKLILAEYI	9	C56H88N10O13	FKLILAEYI	FKLILAEYI	FKLILAEYI	FKLILAEYI	0.7228	0.9873	#N/A	41.09+/-0.04	#N/A	1108.65	2	555.334	#N/A	41.13	25624	16163	9462	80	80	0	#N/A	0.000414	VACV			FALSE
20221007_MS_MRMhr_DC24_VACV_53C_r1.wiff	53C_r1	FKLILAEYI	9	C56H88N10O13	FKLILAEYI	FKLILAEYI	FKLILAEYI	FKLILAEYI	0.825	0.993	#N/A	41.09+/-0.04	#N/A	1108.65	2	555.334	#N/A	41.13	38598	22959	15639	389	389	0	#N/A	0.000649	VACV			FALSE
20221007_MS_MRMhr_DC24_VACV_53C_r2.wiff	53C_r2	FKLILAEYI	9	C56H88N10O13	FKLILAEYI	FKLILAEYI	FKLILAEYI	FKLILAEYI	0.1985	0.8675	#N/A	41.09+/-0.04	#N/A	1108.65	2	555.334	#N/A	41.13	1987	1687	300	0	0	0	#N/A	4.6e-05	VACV			FALSE
20221007_MS_MRMhr_DC24_VACV_53C_r3.wiff	53C_r3	FKLILAEYI	9	C56H88N10O13	FKLILAEYI	FKLILAEYI	FKLILAEYI	FKLILAEYI	0.665	0.9807	#N/A	41.09+/-0.04	#N/A	1108.65	2	555.334	#N/A	41.13	10437	7777	2660	785	785	0	#N/A	0.00019	VACV			FALSE
20221007_MS_MRMhr_DC24_VACV_57C_r1.wiff	57C_r1	FKLILAEYI	9	C56H88N10O13	FKLILAEYI	FKLILAEYI	FKLILAEYI	FKLILAEYI	0.9067	0.8538	#N/A	41.09+/-0.04	#N/A	1108.65	2	555.334	#N/A	41.13	117053	68602	48452	0	0	0	#N/A	0.003541	VACV			FALSE
20221007_MS_MRMhr_DC24_VACV_57C_r2.wiff	57C_r2	FKLILAEYI	9	C56H88N10O13	FKLILAEYI	FKLILAEYI	FKLILAEYI	FKLILAEYI	0.9237	0.8515	#N/A	41.09+/-0.04	#N/A	1108.65	2	555.334	#N/A	41.13	102714	69263	33451	1392	1392	0	#N/A	0.003319	VACV			FALSE
20221007_MS_MRMhr_DC24_VACV_57C_r3.wiff	57C_r3	FKLILAEYI	9	C56H88N10O13	FKLILAEYI	FKLILAEYI	FKLILAEYI	FKLILAEYI	0.8474	0.8212	#N/A	41.09+/-0.04	#N/A	1108.65	2	555.334	#N/A	41.13	79932	51350	28582	399	399	0	#N/A	0.003028	VACV			FALSE
20221007_MS_MRMhr_DC24_VACV_61C_r1.wiff	61C_r1	FKLILAEYI	9	C56H88N10O13	FKLILAEYI	FKLILAEYI	FKLILAEYI	FKLILAEYI	0.9283	0.9589	#N/A	41.09+/-0.04	#N/A	1108.65	2	555.334	#N/A	41.13	106828	56475	50354	0	0	0	#N/A	0.005036	VACV			FALSE
20221007_MS_MRMhr_DC24_VACV_61C_r2.wiff	61C_r2	FKLILAEYI	9	C56H88N10O13	FKLILAEYI	FKLILAEYI	FKLILAEYI	FKLILAEYI	0.8423	0.9582	#N/A	41.09+/-0.04	#N/A	1108.65	2	555.334	#N/A	41.13	81431	47395	34037	1935	1935	0	#N/A	0.003904	VACV			FALSE
20221007_MS_MRMhr_DC24_VACV_61C_r3.wiff	61C_r3	FKLILAEYI	9	C56H88N10O13	FKLILAEYI	FKLILAEYI	FKLILAEYI	FKLILAEYI	0.9144	0.9904	#N/A	41.09+/-0.04	#N/A	1108.65	2	555.334	#N/A	41.13	174694	86419	88275	2756	2756	0	#N/A	0.007496	VACV			FALSE
20221007_MS_MRMhr_DC24_VACV_65C_r1.wiff	65C_r1	FKLILAEYI	9	C56H88N10O13	FKLILAEYI	FKLILAEYI	FKLILAEYI	FKLILAEYI	0.9247	0.9881	#N/A	41.09+/-0.04	#N/A	1108.65	2	555.334	#N/A	41.13	117889	61670	56219	1753	1753	0	#N/A	âˆž	VACV			FALSE
20221007_MS_MRMhr_DC24_VACV_65C_r2.wiff	65C_r2	FKLILAEYI	9	C56H88N10O13	FKLILAEYI	FKLILAEYI	FKLILAEYI	FKLILAEYI	0.8248	0.9901	#N/A	41.09+/-0.04	#N/A	1108.65	2	555.334	#N/A	41.13	54931	31816	23116	1248	1248	0	#N/A	âˆž	VACV			FALSE
20221007_MS_MRMhr_DC24_VACV_69C_r1.wiff	69C_r1	FKLILAEYI	9	C56H88N10O13	FKLILAEYI	FKLILAEYI	FKLILAEYI	FKLILAEYI	0.9368	0.9881	#N/A	41.09+/-0.04	#N/A	1108.65	2	555.334	#N/A	41.13	131592	69761	61831	2983	2983	0	#N/A	âˆž	VACV			FALSE
20221007_MS_MRMhr_DC24_VACV_69C_r2.wiff	69C_r2	FKLILAEYI	9	C56H88N10O13	FKLILAEYI	FKLILAEYI	FKLILAEYI	FKLILAEYI	0.8638	0.9954	#N/A	41.09+/-0.04	#N/A	1108.65	2	555.334	#N/A	41.13	109489	62332	47158	1118	1118	0	#N/A	âˆž	VACV			FALSE
20221007_MS_MRMhr_DC24_VACV_69C_r3.wiff	69C_r3	FKLILAEYI	9	C56H88N10O13	FKLILAEYI	FKLILAEYI	FKLILAEYI	FKLILAEYI	0.9203	0.9833	#N/A	41.09+/-0.04	#N/A	1108.65	2	555.334	#N/A	41.13	122691	66681	56010	211	211	0	#N/A	âˆž	VACV			FALSE
20221007_MS_MRMhr_DC24_VACV_73C_r1.wiff	73C_r1	FKLILAEYI	9	C56H88N10O13	FKLILAEYI	FKLILAEYI	FKLILAEYI	FKLILAEYI	0.9662	0.9898	#N/A	41.09+/-0.04	#N/A	1108.65	2	555.334	#N/A	41.13	192478	106312	86166	409	409	0	#N/A	âˆž	VACV			FALSE
20221007_MS_MRMhr_DC24_VACV_73C_r2.wiff	73C_r2	FKLILAEYI	9	C56H88N10O13	FKLILAEYI	FKLILAEYI	FKLILAEYI	FKLILAEYI	0.9499	0.9867	#N/A	41.09+/-0.04	#N/A	1108.65	2	555.334	#N/A	41.13	340615	185514	155101	617	617	0	#N/A	âˆž	VACV			FALSE
20221007_MS_MRMhr_DC24_VACV_73C_r3.wiff	73C_r3	FKLILAEYI	9	C56H88N10O13	FKLILAEYI	FKLILAEYI	FKLILAEYI	FKLILAEYI	0.9581	0.9942	#N/A	41.09+/-0.04	#N/A	1108.65	2	555.334	#N/A	41.13	274914	148068	126846	6831	6831	0	#N/A	âˆž	VACV			FALSE
20221010_MS_zenoSWATH_DC24_VACV_37C_r1.wiff	SWATH_r1	TGPVGQLWM	9	C45H69N11O12S	TGPVGQLWM	TGPVGQLWM	TGPVGQLWM	TGPVGQLWM	0.6944	0.8406	#N/A	34.57+/-0.1	#N/A	987.485	2	494.75	#N/A	34.53	5452	3225	2227	53	53	0	#N/A	4e-05	VACV			FALSE
20221010_MS_zenoSWATH_DC24_VACV_37C_r2.wiff	SWATH_r2	TGPVGQLWM	9	C45H69N11O12S	TGPVGQLWM	TGPVGQLWM	TGPVGQLWM	TGPVGQLWM	0.9411	0.9863	#N/A	34.57+/-0.1	#N/A	987.485	2	494.75	#N/A	34.53	86103	24277	61826	36	36	0	#N/A	0.000892	VACV			FALSE
20221010_MS_zenoSWATH_DC24_VACV_37C_r3.wiff	SWATH_r3	TGPVGQLWM	9	C45H69N11O12S	TGPVGQLWM	TGPVGQLWM	TGPVGQLWM	TGPVGQLWM	0.7411	0.8351	#N/A	34.57+/-0.1	#N/A	987.485	2	494.75	#N/A	34.53	4842	2857	1985	38	38	0	#N/A	4.2e-05	VACV			FALSE
20221007_MS_MRMhr_DC24_VACV_37C_r1.wiff	37C_r1	TGPVGQLWM	9	C45H69N11O12S	TGPVGQLWM	TGPVGQLWM	TGPVGQLWM	TGPVGQLWM	0.3245	0.8886	#N/A	34.57+/-0.1	#N/A	987.485	2	494.75	#N/A	34.53	8401	7545	857	0	0	0	#N/A	7.1e-05	VACV			FALSE
20221007_MS_MRMhr_DC24_VACV_37C_r2.wiff	37C_r2	TGPVGQLWM	9	C45H69N11O12S	TGPVGQLWM	TGPVGQLWM	TGPVGQLWM	TGPVGQLWM	0.946	0.9813	#N/A	34.57+/-0.1	#N/A	987.485	2	494.75	#N/A	34.53	180201	79239	100962	4164	4164	0	#N/A	0.001505	VACV			FALSE
20221007_MS_MRMhr_DC24_VACV_37C_r3.wiff	37C_r3	TGPVGQLWM	9	C45H69N11O12S	TGPVGQLWM	TGPVGQLWM	TGPVGQLWM	TGPVGQLWM	0.4622	0.9143	#N/A	34.57+/-0.1	#N/A	987.485	2	494.75	#N/A	34.53	10025	8062	1963	0	0	0	#N/A	0.000101	VACV			FALSE
20221007_MS_MRMhr_DC24_VACV_41C_r1.wiff	41C_r1	TGPVGQLWM	9	C45H69N11O12S	TGPVGQLWM	TGPVGQLWM	TGPVGQLWM	TGPVGQLWM	0.8911	0.9698	#N/A	34.57+/-0.1	#N/A	987.485	2	494.75	#N/A	34.53	48927	21424	27503	3403	3403	0	#N/A	0.000689	VACV			FALSE
20221007_MS_MRMhr_DC24_VACV_41C_r2.wiff	41C_r2	TGPVGQLWM	9	C45H69N11O12S	TGPVGQLWM	TGPVGQLWM	TGPVGQLWM	TGPVGQLWM	0.8953	0.9615	#N/A	34.57+/-0.1	#N/A	987.485	2	494.75	#N/A	34.53	66596	28312	38284	2658	2658	0	#N/A	0.000587	VACV			FALSE
20221007_MS_MRMhr_DC24_VACV_41C_r3.wiff	41C_r3	TGPVGQLWM	9	C45H69N11O12S	TGPVGQLWM	TGPVGQLWM	TGPVGQLWM	TGPVGQLWM	0.906	0.9412	#N/A	34.57+/-0.1	#N/A	987.485	2	494.75	#N/A	34.53	26048	15329	10719	0	0	0	#N/A	0.000202	VACV			FALSE
20221007_MS_MRMhr_DC24_VACV_45C_r1.wiff	45C_r1	TGPVGQLWM	9	C45H69N11O12S	TGPVGQLWM	TGPVGQLWM	TGPVGQLWM	TGPVGQLWM	0.7358	0.9419	#N/A	34.57+/-0.1	#N/A	987.485	2	494.75	#N/A	34.53	10097	7837	2260	393	393	0	#N/A	0.000105	VACV			FALSE
20221007_MS_MRMhr_DC24_VACV_45C_r2.wiff	45C_r2	TGPVGQLWM	9	C45H69N11O12S	TGPVGQLWM	TGPVGQLWM	TGPVGQLWM	TGPVGQLWM	0.7914	0.9411	#N/A	34.57+/-0.1	#N/A	987.485	2	494.75	#N/A	34.53	24748	14563	10186	0	0	0	#N/A	0.000242	VACV			FALSE
20221007_MS_MRMhr_DC24_VACV_45C_r3.wiff	45C_r3	TGPVGQLWM	9	C45H69N11O12S	TGPVGQLWM	TGPVGQLWM	TGPVGQLWM	TGPVGQLWM	0.4282	0.8619	#N/A	34.57+/-0.1	#N/A	987.485	2	494.75	#N/A	34.53	10023	7494	2529	0	0	0	#N/A	9.1e-05	VACV			FALSE
20221007_MS_MRMhr_DC24_VACV_49C_r1.wiff	49C_r1	TGPVGQLWM	9	C45H69N11O12S	TGPVGQLWM	TGPVGQLWM	TGPVGQLWM	TGPVGQLWM	0.3245	0.9171	#N/A	34.57+/-0.1	#N/A	987.485	2	494.75	#N/A	34.53	5470	5085	386	0	0	0	#N/A	9.1e-05	VACV			FALSE
20221007_MS_MRMhr_DC24_VACV_49C_r2.wiff	49C_r2	TGPVGQLWM	9	C45H69N11O12S	TGPVGQLWM	TGPVGQLWM	TGPVGQLWM	TGPVGQLWM	0	0.8706	#N/A	34.57+/-0.1	#N/A	987.485	2	494.75	#N/A	34.53	3747	3747	0	0	0	0	#N/A	4.9e-05	VACV			FALSE
20221007_MS_MRMhr_DC24_VACV_49C_r3.wiff	49C_r3	TGPVGQLWM	9	C45H69N11O12S	TGPVGQLWM	TGPVGQLWM	TGPVGQLWM	TGPVGQLWM	0	0.892	#N/A	34.57+/-0.1	#N/A	987.485	2	494.75	#N/A	34.53	4761	4761	0	0	0	0	#N/A	7.7e-05	VACV			FALSE
20221007_MS_MRMhr_DC24_VACV_53C_r1.wiff	53C_r1	TGPVGQLWM	9	C45H69N11O12S	TGPVGQLWM	TGPVGQLWM	TGPVGQLWM	TGPVGQLWM	0	0.8447	#N/A	34.57+/-0.1	#N/A	987.485	2	494.75	#N/A	34.53	2415	2415	0	0	0	0	#N/A	4.1e-05	VACV			FALSE
20221007_MS_MRMhr_DC24_VACV_53C_r2.wiff	53C_r2	TGPVGQLWM	9	C45H69N11O12S	TGPVGQLWM	TGPVGQLWM	TGPVGQLWM	TGPVGQLWM	0	0.833	#N/A	34.57+/-0.1	#N/A	987.485	2	494.75	#N/A	34.53	2705	2705	0	102	102	0	#N/A	6.3e-05	VACV			FALSE
20221007_MS_MRMhr_DC24_VACV_53C_r3.wiff	53C_r3	TGPVGQLWM	9	C45H69N11O12S	TGPVGQLWM	TGPVGQLWM	TGPVGQLWM	TGPVGQLWM	0	0.7891	#N/A	34.57+/-0.1	#N/A	987.485	2	494.75	#N/A	34.53	2044	2044	0	299	299	0	#N/A	3.7e-05	VACV			FALSE
20221007_MS_MRMhr_DC24_VACV_57C_r1.wiff	57C_r1	TGPVGQLWM	9	C45H69N11O12S	TGPVGQLWM	TGPVGQLWM	TGPVGQLWM	TGPVGQLWM	0	0.7392	#N/A	34.57+/-0.1	#N/A	987.485	2	494.75	#N/A	34.53	4135	4135	0	0	0	0	#N/A	0.000125	VACV			FALSE
20221007_MS_MRMhr_DC24_VACV_57C_r2.wiff	57C_r2	TGPVGQLWM	9	C45H69N11O12S	TGPVGQLWM	TGPVGQLWM	TGPVGQLWM	TGPVGQLWM	0	0.6095	#N/A	34.57+/-0.1	#N/A	987.485	2	494.75	#N/A	34.53	3423	3423	0	601	601	0	#N/A	0.000111	VACV			FALSE
20221007_MS_MRMhr_DC24_VACV_57C_r3.wiff	57C_r3	TGPVGQLWM	9	C45H69N11O12S	TGPVGQLWM	TGPVGQLWM	TGPVGQLWM	TGPVGQLWM	0	0.6467	#N/A	34.57+/-0.1	#N/A	987.485	2	494.75	#N/A	34.53	3613	3613	0	1334	1334	0	#N/A	0.000137	VACV			FALSE
20221007_MS_MRMhr_DC24_VACV_61C_r1.wiff	61C_r1	TGPVGQLWM	9	C45H69N11O12S	TGPVGQLWM	TGPVGQLWM	TGPVGQLWM	TGPVGQLWM	0	0.549	#N/A	34.57+/-0.1	#N/A	987.485	2	494.75	#N/A	34.53	9205	9205	0	814	814	0	#N/A	0.000434	VACV			FALSE
20221007_MS_MRMhr_DC24_VACV_61C_r2.wiff	61C_r2	TGPVGQLWM	9	C45H69N11O12S	TGPVGQLWM	TGPVGQLWM	TGPVGQLWM	TGPVGQLWM	0	0.6855	#N/A	34.57+/-0.1	#N/A	987.485	2	494.75	#N/A	34.53	5531	5531	0	168	168	0	#N/A	0.000265	VACV			FALSE
20221007_MS_MRMhr_DC24_VACV_61C_r3.wiff	61C_r3	TGPVGQLWM	9	C45H69N11O12S	TGPVGQLWM	TGPVGQLWM	TGPVGQLWM	TGPVGQLWM	0	0.6785	#N/A	34.57+/-0.1	#N/A	987.485	2	494.75	#N/A	34.53	7478	7478	0	0	0	0	#N/A	0.000321	VACV			FALSE
20221007_MS_MRMhr_DC24_VACV_65C_r1.wiff	65C_r1	TGPVGQLWM	9	C45H69N11O12S	TGPVGQLWM	TGPVGQLWM	TGPVGQLWM	TGPVGQLWM	0	0.7967	#N/A	34.57+/-0.1	#N/A	987.485	2	494.75	#N/A	34.53	2489	2489	0	1892	1892	0	#N/A	âˆž	VACV			FALSE
20221007_MS_MRMhr_DC24_VACV_65C_r2.wiff	65C_r2	TGPVGQLWM	9	C45H69N11O12S	TGPVGQLWM	TGPVGQLWM	TGPVGQLWM	TGPVGQLWM	0	0.8692	#N/A	34.57+/-0.1	#N/A	987.485	2	494.75	#N/A	34.53	2838	2838	0	448	448	0	#N/A	âˆž	VACV			FALSE
20221007_MS_MRMhr_DC24_VACV_69C_r1.wiff	69C_r1	TGPVGQLWM	9	C45H69N11O12S	TGPVGQLWM	TGPVGQLWM	TGPVGQLWM	TGPVGQLWM	0	0.7269	#N/A	34.57+/-0.1	#N/A	987.485	2	494.75	#N/A	34.53	3521	3521	0	121	121	0	#N/A	âˆž	VACV			FALSE
20221007_MS_MRMhr_DC24_VACV_69C_r2.wiff	69C_r2	TGPVGQLWM	9	C45H69N11O12S	TGPVGQLWM	TGPVGQLWM	TGPVGQLWM	TGPVGQLWM	0	0.8321	#N/A	34.57+/-0.1	#N/A	987.485	2	494.75	#N/A	34.53	2003	2003	0	1921	1921	0	#N/A	âˆž	VACV			FALSE
20221007_MS_MRMhr_DC24_VACV_69C_r3.wiff	69C_r3	TGPVGQLWM	9	C45H69N11O12S	TGPVGQLWM	TGPVGQLWM	TGPVGQLWM	TGPVGQLWM	0	0.9489	#N/A	34.57+/-0.1	#N/A	987.485	2	494.75	#N/A	34.53	3153	3153	0	1159	1159	0	#N/A	âˆž	VACV			FALSE
20221007_MS_MRMhr_DC24_VACV_73C_r1.wiff	73C_r1	TGPVGQLWM	9	C45H69N11O12S	TGPVGQLWM	TGPVGQLWM	TGPVGQLWM	TGPVGQLWM	0	0.812	#N/A	34.57+/-0.1	#N/A	987.485	2	494.75	#N/A	34.53	4098	4098	0	0	0	0	#N/A	âˆž	VACV			FALSE
20221007_MS_MRMhr_DC24_VACV_73C_r2.wiff	73C_r2	TGPVGQLWM	9	C45H69N11O12S	TGPVGQLWM	TGPVGQLWM	TGPVGQLWM	TGPVGQLWM	0	0.792	#N/A	34.57+/-0.1	#N/A	987.485	2	494.75	#N/A	34.53	4824	4824	0	39	39	0	#N/A	âˆž	VACV			FALSE
20221007_MS_MRMhr_DC24_VACV_73C_r3.wiff	73C_r3	TGPVGQLWM	9	C45H69N11O12S	TGPVGQLWM	TGPVGQLWM	TGPVGQLWM	TGPVGQLWM	0	0.7848	#N/A	34.57+/-0.1	#N/A	987.485	2	494.75	#N/A	34.53	3869	3869	0	91	91	0	#N/A	âˆž	VACV			FALSE
20221010_MS_zenoSWATH_DC24_VACV_37C_r1.wiff	SWATH_r1	TGPVGQLWM	9	C45H69N11O13S	TGPVGQLWM[+16]	TGPVGQLWM(unimod:35)	TGPVGQLWM[Oxi]	TGPVGQLWM[Oxidation (M)]	0.8679	0.6408	#N/A	28.59+/-0.15	#N/A	1003.48	2	502.747	#N/A	28.67	24186	6618	17568	0	0	0	#N/A	0.000176	VACV			FALSE
20221010_MS_zenoSWATH_DC24_VACV_37C_r2.wiff	SWATH_r2	TGPVGQLWM	9	C45H69N11O13S	TGPVGQLWM[+16]	TGPVGQLWM(unimod:35)	TGPVGQLWM[Oxi]	TGPVGQLWM[Oxidation (M)]	0.9691	0.883	#N/A	28.59+/-0.15	#N/A	1003.48	2	502.747	#N/A	28.67	133289	43609	89680	427	427	0	#N/A	0.001381	VACV			FALSE
20221010_MS_zenoSWATH_DC24_VACV_37C_r3.wiff	SWATH_r3	TGPVGQLWM	9	C45H69N11O13S	TGPVGQLWM[+16]	TGPVGQLWM(unimod:35)	TGPVGQLWM[Oxi]	TGPVGQLWM[Oxidation (M)]	0.9024	0.6454	#N/A	28.59+/-0.15	#N/A	1003.48	2	502.747	#N/A	28.67	30000	8255	21745	0	0	0	#N/A	0.000263	VACV			FALSE
20221007_MS_MRMhr_DC24_VACV_37C_r1.wiff	37C_r1	TGPVGQLWM	9	C45H69N11O13S	TGPVGQLWM[+16]	TGPVGQLWM(unimod:35)	TGPVGQLWM[Oxi]	TGPVGQLWM[Oxidation (M)]	0.8166	0.7341	#N/A	28.59+/-0.15	#N/A	1003.48	2	502.747	#N/A	28.67	38922	17719	21203	2585	2585	0	#N/A	0.000329	VACV			FALSE
20221007_MS_MRMhr_DC24_VACV_37C_r2.wiff	37C_r2	TGPVGQLWM	9	C45H69N11O13S	TGPVGQLWM[+16]	TGPVGQLWM(unimod:35)	TGPVGQLWM[Oxi]	TGPVGQLWM[Oxidation (M)]	0.9498	0.9413	#N/A	28.59+/-0.15	#N/A	1003.48	2	502.747	#N/A	28.67	243455	117451	126004	2098	2098	0	#N/A	0.002033	VACV			FALSE
20221007_MS_MRMhr_DC24_VACV_37C_r3.wiff	37C_r3	TGPVGQLWM	9	C45H69N11O13S	TGPVGQLWM[+16]	TGPVGQLWM(unimod:35)	TGPVGQLWM[Oxi]	TGPVGQLWM[Oxidation (M)]	0.9204	0.5955	#N/A	28.59+/-0.15	#N/A	1003.48	2	502.747	#N/A	28.67	62071	24101	37970	0	0	0	#N/A	0.000622	VACV			FALSE
20221007_MS_MRMhr_DC24_VACV_41C_r1.wiff	41C_r1	TGPVGQLWM	9	C45H69N11O13S	TGPVGQLWM[+16]	TGPVGQLWM(unimod:35)	TGPVGQLWM[Oxi]	TGPVGQLWM[Oxidation (M)]	0.9284	0.8312	#N/A	28.59+/-0.15	#N/A	1003.48	2	502.747	#N/A	28.67	134952	62757	72196	2454	2454	0	#N/A	0.001902	VACV			FALSE
20221007_MS_MRMhr_DC24_VACV_41C_r2.wiff	41C_r2	TGPVGQLWM	9	C45H69N11O13S	TGPVGQLWM[+16]	TGPVGQLWM(unimod:35)	TGPVGQLWM[Oxi]	TGPVGQLWM[Oxidation (M)]	0.9773	0.8316	#N/A	28.59+/-0.15	#N/A	1003.48	2	502.747	#N/A	28.67	207214	95817	111397	0	0	0	#N/A	0.001827	VACV			FALSE
20221007_MS_MRMhr_DC24_VACV_41C_r3.wiff	41C_r3	TGPVGQLWM	9	C45H69N11O13S	TGPVGQLWM[+16]	TGPVGQLWM(unimod:35)	TGPVGQLWM[Oxi]	TGPVGQLWM[Oxidation (M)]	0.9566	0.6657	#N/A	28.59+/-0.15	#N/A	1003.48	2	502.747	#N/A	28.67	97903	35936	61967	2241	2241	0	#N/A	0.00076	VACV			FALSE
20221007_MS_MRMhr_DC24_VACV_45C_r1.wiff	45C_r1	TGPVGQLWM	9	C45H69N11O13S	TGPVGQLWM[+16]	TGPVGQLWM(unimod:35)	TGPVGQLWM[Oxi]	TGPVGQLWM[Oxidation (M)]	0.9304	0.7074	#N/A	28.59+/-0.15	#N/A	1003.48	2	502.747	#N/A	28.67	30077	13805	16272	2082	2082	0	#N/A	0.000314	VACV			FALSE
20221007_MS_MRMhr_DC24_VACV_45C_r2.wiff	45C_r2	TGPVGQLWM	9	C45H69N11O13S	TGPVGQLWM[+16]	TGPVGQLWM(unimod:35)	TGPVGQLWM[Oxi]	TGPVGQLWM[Oxidation (M)]	0.8583	0.6401	#N/A	28.59+/-0.15	#N/A	1003.48	2	502.747	#N/A	28.67	34743	18204	16539	0	0	0	#N/A	0.00034	VACV			FALSE
20221007_MS_MRMhr_DC24_VACV_45C_r3.wiff	45C_r3	TGPVGQLWM	9	C45H69N11O13S	TGPVGQLWM[+16]	TGPVGQLWM(unimod:35)	TGPVGQLWM[Oxi]	TGPVGQLWM[Oxidation (M)]	0.933	0.6168	#N/A	28.59+/-0.15	#N/A	1003.48	2	502.747	#N/A	28.67	30265	13975	16290	0	0	0	#N/A	0.000274	VACV			FALSE
20221007_MS_MRMhr_DC24_VACV_49C_r1.wiff	49C_r1	TGPVGQLWM	9	C45H69N11O13S	TGPVGQLWM[+16]	TGPVGQLWM(unimod:35)	TGPVGQLWM[Oxi]	TGPVGQLWM[Oxidation (M)]	0.454	0.61	#N/A	28.59+/-0.15	#N/A	1003.48	2	502.747	#N/A	28.67	4486	4342	144	304	304	0	#N/A	7.4e-05	VACV			FALSE
20221007_MS_MRMhr_DC24_VACV_49C_r2.wiff	49C_r2	TGPVGQLWM	9	C45H69N11O13S	TGPVGQLWM[+16]	TGPVGQLWM(unimod:35)	TGPVGQLWM[Oxi]	TGPVGQLWM[Oxidation (M)]	0	0.6117	#N/A	28.59+/-0.15	#N/A	1003.48	2	502.747	#N/A	28.67	5755	5755	0	0	0	0	#N/A	7.5e-05	VACV			FALSE
20221007_MS_MRMhr_DC24_VACV_49C_r3.wiff	49C_r3	TGPVGQLWM	9	C45H69N11O13S	TGPVGQLWM[+16]	TGPVGQLWM(unimod:35)	TGPVGQLWM[Oxi]	TGPVGQLWM[Oxidation (M)]	0.41	0.6762	#N/A	28.59+/-0.15	#N/A	1003.48	2	502.747	#N/A	28.67	7131	5251	1880	0	0	0	#N/A	0.000115	VACV			FALSE
20221007_MS_MRMhr_DC24_VACV_53C_r1.wiff	53C_r1	TGPVGQLWM	9	C45H69N11O13S	TGPVGQLWM[+16]	TGPVGQLWM(unimod:35)	TGPVGQLWM[Oxi]	TGPVGQLWM[Oxidation (M)]	0	0.7883	#N/A	28.59+/-0.15	#N/A	1003.48	2	502.747	#N/A	28.67	2338	2338	0	147	147	0	#N/A	3.9e-05	VACV			FALSE
20221007_MS_MRMhr_DC24_VACV_53C_r2.wiff	53C_r2	TGPVGQLWM	9	C45H69N11O13S	TGPVGQLWM[+16]	TGPVGQLWM(unimod:35)	TGPVGQLWM[Oxi]	TGPVGQLWM[Oxidation (M)]	0	0.7679	#N/A	28.59+/-0.15	#N/A	1003.48	2	502.747	#N/A	28.67	3408	3408	0	0	0	0	#N/A	8e-05	VACV			FALSE
20221007_MS_MRMhr_DC24_VACV_53C_r3.wiff	53C_r3	TGPVGQLWM	9	C45H69N11O13S	TGPVGQLWM[+16]	TGPVGQLWM(unimod:35)	TGPVGQLWM[Oxi]	TGPVGQLWM[Oxidation (M)]	0	0.7908	#N/A	28.59+/-0.15	#N/A	1003.48	2	502.747	#N/A	28.67	2205	2205	0	469	469	0	#N/A	4e-05	VACV			FALSE
20221007_MS_MRMhr_DC24_VACV_57C_r1.wiff	57C_r1	TGPVGQLWM	9	C45H69N11O13S	TGPVGQLWM[+16]	TGPVGQLWM(unimod:35)	TGPVGQLWM[Oxi]	TGPVGQLWM[Oxidation (M)]	0	0.9444	#N/A	28.59+/-0.15	#N/A	1003.48	2	502.747	#N/A	28.67	2418	2418	0	0	0	0	#N/A	7.3e-05	VACV			FALSE
20221007_MS_MRMhr_DC24_VACV_57C_r2.wiff	57C_r2	TGPVGQLWM	9	C45H69N11O13S	TGPVGQLWM[+16]	TGPVGQLWM(unimod:35)	TGPVGQLWM[Oxi]	TGPVGQLWM[Oxidation (M)]	0	0.8208	#N/A	28.59+/-0.15	#N/A	1003.48	2	502.747	#N/A	28.67	3875	3875	0	0	0	0	#N/A	0.000125	VACV			FALSE
20221007_MS_MRMhr_DC24_VACV_57C_r3.wiff	57C_r3	TGPVGQLWM	9	C45H69N11O13S	TGPVGQLWM[+16]	TGPVGQLWM(unimod:35)	TGPVGQLWM[Oxi]	TGPVGQLWM[Oxidation (M)]	0	0.8757	#N/A	28.59+/-0.15	#N/A	1003.48	2	502.747	#N/A	28.67	1142	1142	0	545	545	0	#N/A	4.3e-05	VACV			FALSE
20221007_MS_MRMhr_DC24_VACV_61C_r1.wiff	61C_r1	TGPVGQLWM	9	C45H69N11O13S	TGPVGQLWM[+16]	TGPVGQLWM(unimod:35)	TGPVGQLWM[Oxi]	TGPVGQLWM[Oxidation (M)]	0	0.6161	#N/A	28.59+/-0.15	#N/A	1003.48	2	502.747	#N/A	28.67	2582	2582	0	1016	1016	0	#N/A	0.000122	VACV			FALSE
20221007_MS_MRMhr_DC24_VACV_61C_r2.wiff	61C_r2	TGPVGQLWM	9	C45H69N11O13S	TGPVGQLWM[+16]	TGPVGQLWM(unimod:35)	TGPVGQLWM[Oxi]	TGPVGQLWM[Oxidation (M)]	0	0.8422	#N/A	28.59+/-0.15	#N/A	1003.48	2	502.747	#N/A	28.67	3197	3197	0	265	265	0	#N/A	0.000153	VACV			FALSE
20221007_MS_MRMhr_DC24_VACV_61C_r3.wiff	61C_r3	TGPVGQLWM	9	C45H69N11O13S	TGPVGQLWM[+16]	TGPVGQLWM(unimod:35)	TGPVGQLWM[Oxi]	TGPVGQLWM[Oxidation (M)]	0	0.9128	#N/A	28.59+/-0.15	#N/A	1003.48	2	502.747	#N/A	28.67	1250	1250	0	733	733	0	#N/A	5.4e-05	VACV			FALSE
20221007_MS_MRMhr_DC24_VACV_65C_r1.wiff	65C_r1	TGPVGQLWM	9	C45H69N11O13S	TGPVGQLWM[+16]	TGPVGQLWM(unimod:35)	TGPVGQLWM[Oxi]	TGPVGQLWM[Oxidation (M)]	0	0.8719	#N/A	28.59+/-0.15	#N/A	1003.48	2	502.747	#N/A	28.67	4992	4992	0	0	0	0	#N/A	âˆž	VACV			FALSE
20221007_MS_MRMhr_DC24_VACV_65C_r2.wiff	65C_r2	TGPVGQLWM	9	C45H69N11O13S	TGPVGQLWM[+16]	TGPVGQLWM(unimod:35)	TGPVGQLWM[Oxi]	TGPVGQLWM[Oxidation (M)]	0	0.9682	#N/A	28.59+/-0.15	#N/A	1003.48	2	502.747	#N/A	28.67	2636	2636	0	667	667	0	#N/A	âˆž	VACV			FALSE
20221007_MS_MRMhr_DC24_VACV_69C_r1.wiff	69C_r1	TGPVGQLWM	9	C45H69N11O13S	TGPVGQLWM[+16]	TGPVGQLWM(unimod:35)	TGPVGQLWM[Oxi]	TGPVGQLWM[Oxidation (M)]	0	0.8788	#N/A	28.59+/-0.15	#N/A	1003.48	2	502.747	#N/A	28.67	2888	2888	0	343	343	0	#N/A	âˆž	VACV			FALSE
20221007_MS_MRMhr_DC24_VACV_69C_r2.wiff	69C_r2	TGPVGQLWM	9	C45H69N11O13S	TGPVGQLWM[+16]	TGPVGQLWM(unimod:35)	TGPVGQLWM[Oxi]	TGPVGQLWM[Oxidation (M)]	0	0.8013	#N/A	28.59+/-0.15	#N/A	1003.48	2	502.747	#N/A	28.67	4552	4552	0	0	0	0	#N/A	âˆž	VACV			FALSE
20221007_MS_MRMhr_DC24_VACV_69C_r3.wiff	69C_r3	TGPVGQLWM	9	C45H69N11O13S	TGPVGQLWM[+16]	TGPVGQLWM(unimod:35)	TGPVGQLWM[Oxi]	TGPVGQLWM[Oxidation (M)]	0	0.8954	#N/A	28.59+/-0.15	#N/A	1003.48	2	502.747	#N/A	28.67	3123	3123	0	1744	1744	0	#N/A	âˆž	VACV			FALSE
20221007_MS_MRMhr_DC24_VACV_73C_r1.wiff	73C_r1	TGPVGQLWM	9	C45H69N11O13S	TGPVGQLWM[+16]	TGPVGQLWM(unimod:35)	TGPVGQLWM[Oxi]	TGPVGQLWM[Oxidation (M)]	0	0.6216	#N/A	28.59+/-0.15	#N/A	1003.48	2	502.747	#N/A	28.67	1330	1330	0	1002	1002	0	#N/A	âˆž	VACV			FALSE
20221007_MS_MRMhr_DC24_VACV_73C_r2.wiff	73C_r2	TGPVGQLWM	9	C45H69N11O13S	TGPVGQLWM[+16]	TGPVGQLWM(unimod:35)	TGPVGQLWM[Oxi]	TGPVGQLWM[Oxidation (M)]	0	0.7221	#N/A	28.59+/-0.15	#N/A	1003.48	2	502.747	#N/A	28.67	2645	2645	0	0	0	0	#N/A	âˆž	VACV			FALSE
20221007_MS_MRMhr_DC24_VACV_73C_r3.wiff	73C_r3	TGPVGQLWM	9	C45H69N11O13S	TGPVGQLWM[+16]	TGPVGQLWM(unimod:35)	TGPVGQLWM[Oxi]	TGPVGQLWM[Oxidation (M)]	0.2451	0.6133	#N/A	28.59+/-0.15	#N/A	1003.48	2	502.747	#N/A	28.67	2827	2339	488	0	0	0	#N/A	âˆž	VACV			FALSE
20221010_MS_zenoSWATH_DC24_VACV_37C_r1.wiff	SWATH_r1	YAPVSPIVI	9	C47H75N9O12	YAPVSPIVI	YAPVSPIVI	YAPVSPIVI	YAPVSPIVI	0.972	0.9936	#N/A	35.06+/-0.13	#N/A	957.554	2	479.784	#N/A	35.07	1303831	305403	998429	910	910	0	#N/A	0.0095	VACV			FALSE
20221010_MS_zenoSWATH_DC24_VACV_37C_r2.wiff	SWATH_r2	YAPVSPIVI	9	C47H75N9O12	YAPVSPIVI	YAPVSPIVI	YAPVSPIVI	YAPVSPIVI	0.9691	0.9932	#N/A	35.06+/-0.13	#N/A	957.554	2	479.784	#N/A	35.07	975260	223176	752084	844	844	0	#N/A	0.010105	VACV			FALSE
20221010_MS_zenoSWATH_DC24_VACV_37C_r3.wiff	SWATH_r3	YAPVSPIVI	9	C47H75N9O12	YAPVSPIVI	YAPVSPIVI	YAPVSPIVI	YAPVSPIVI	0.9616	0.9933	#N/A	35.06+/-0.13	#N/A	957.554	2	479.784	#N/A	35.07	1033966	244146	789820	363	363	0	#N/A	0.009058	VACV			FALSE
20221007_MS_MRMhr_DC24_VACV_37C_r1.wiff	37C_r1	YAPVSPIVI	9	C47H75N9O12	YAPVSPIVI	YAPVSPIVI	YAPVSPIVI	YAPVSPIVI	0.972	0.9957	#N/A	35.06+/-0.13	#N/A	957.554	2	479.784	#N/A	35.07	745652	540745	204907	1851	1851	0	#N/A	0.006295	VACV			FALSE
20221007_MS_MRMhr_DC24_VACV_37C_r2.wiff	37C_r2	YAPVSPIVI	9	C47H75N9O12	YAPVSPIVI	YAPVSPIVI	YAPVSPIVI	YAPVSPIVI	0.9646	0.9972	#N/A	35.06+/-0.13	#N/A	957.554	2	479.784	#N/A	35.07	787693	556542	231151	0	0	0	#N/A	0.006578	VACV			FALSE
20221007_MS_MRMhr_DC24_VACV_37C_r3.wiff	37C_r3	YAPVSPIVI	9	C47H75N9O12	YAPVSPIVI	YAPVSPIVI	YAPVSPIVI	YAPVSPIVI	0.9767	0.9958	#N/A	35.06+/-0.13	#N/A	957.554	2	479.784	#N/A	35.07	675352	492213	183139	1218	1218	0	#N/A	0.006771	VACV			FALSE
20221007_MS_MRMhr_DC24_VACV_41C_r1.wiff	41C_r1	YAPVSPIVI	9	C47H75N9O12	YAPVSPIVI	YAPVSPIVI	YAPVSPIVI	YAPVSPIVI	0.9748	0.9977	#N/A	35.06+/-0.13	#N/A	957.554	2	479.784	#N/A	35.07	641446	449089	192357	2308	2308	0	#N/A	0.009039	VACV			FALSE
20221007_MS_MRMhr_DC24_VACV_41C_r2.wiff	41C_r2	YAPVSPIVI	9	C47H75N9O12	YAPVSPIVI	YAPVSPIVI	YAPVSPIVI	YAPVSPIVI	0.9493	0.9965	#N/A	35.06+/-0.13	#N/A	957.554	2	479.784	#N/A	35.07	826754	588627	238127	235	235	0	#N/A	0.00729	VACV			FALSE
20221007_MS_MRMhr_DC24_VACV_41C_r3.wiff	41C_r3	YAPVSPIVI	9	C47H75N9O12	YAPVSPIVI	YAPVSPIVI	YAPVSPIVI	YAPVSPIVI	0.9752	0.9985	#N/A	35.06+/-0.13	#N/A	957.554	2	479.784	#N/A	35.07	809825	581117	228708	293	293	0	#N/A	0.006284	VACV			FALSE
20221007_MS_MRMhr_DC24_VACV_45C_r1.wiff	45C_r1	YAPVSPIVI	9	C47H75N9O12	YAPVSPIVI	YAPVSPIVI	YAPVSPIVI	YAPVSPIVI	0.9622	0.9958	#N/A	35.06+/-0.13	#N/A	957.554	2	479.784	#N/A	35.07	670385	440461	229924	4002	4002	0	#N/A	0.006996	VACV			FALSE
20221007_MS_MRMhr_DC24_VACV_45C_r2.wiff	45C_r2	YAPVSPIVI	9	C47H75N9O12	YAPVSPIVI	YAPVSPIVI	YAPVSPIVI	YAPVSPIVI	0.9628	0.998	#N/A	35.06+/-0.13	#N/A	957.554	2	479.784	#N/A	35.07	709570	492729	216842	1144	1144	0	#N/A	0.00695	VACV			FALSE
20221007_MS_MRMhr_DC24_VACV_45C_r3.wiff	45C_r3	YAPVSPIVI	9	C47H75N9O12	YAPVSPIVI	YAPVSPIVI	YAPVSPIVI	YAPVSPIVI	0.9665	0.9973	#N/A	35.06+/-0.13	#N/A	957.554	2	479.784	#N/A	35.07	693252	506056	187196	2676	2676	0	#N/A	0.006284	VACV			FALSE
20221007_MS_MRMhr_DC24_VACV_49C_r1.wiff	49C_r1	YAPVSPIVI	9	C47H75N9O12	YAPVSPIVI	YAPVSPIVI	YAPVSPIVI	YAPVSPIVI	0.9675	0.9983	#N/A	35.06+/-0.13	#N/A	957.554	2	479.784	#N/A	35.07	534937	366749	168189	1179	1179	0	#N/A	0.008881	VACV			FALSE
20221007_MS_MRMhr_DC24_VACV_49C_r2.wiff	49C_r2	YAPVSPIVI	9	C47H75N9O12	YAPVSPIVI	YAPVSPIVI	YAPVSPIVI	YAPVSPIVI	0.9644	0.9977	#N/A	35.06+/-0.13	#N/A	957.554	2	479.784	#N/A	35.07	575310	415750	159560	6786	6786	0	#N/A	0.007467	VACV			FALSE
20221007_MS_MRMhr_DC24_VACV_49C_r3.wiff	49C_r3	YAPVSPIVI	9	C47H75N9O12	YAPVSPIVI	YAPVSPIVI	YAPVSPIVI	YAPVSPIVI	0.9209	0.996	#N/A	35.06+/-0.13	#N/A	957.554	2	479.784	#N/A	35.07	529911	382464	147447	1753	1753	0	#N/A	0.008572	VACV			FALSE
20221007_MS_MRMhr_DC24_VACV_53C_r1.wiff	53C_r1	YAPVSPIVI	9	C47H75N9O12	YAPVSPIVI	YAPVSPIVI	YAPVSPIVI	YAPVSPIVI	0.9411	0.996	#N/A	35.06+/-0.13	#N/A	957.554	2	479.784	#N/A	35.07	324085	236465	87620	1654	1654	0	#N/A	0.005451	VACV			FALSE
20221007_MS_MRMhr_DC24_VACV_53C_r2.wiff	53C_r2	YAPVSPIVI	9	C47H75N9O12	YAPVSPIVI	YAPVSPIVI	YAPVSPIVI	YAPVSPIVI	0.9414	0.9963	#N/A	35.06+/-0.13	#N/A	957.554	2	479.784	#N/A	35.07	466008	347848	118160	2123	2123	0	#N/A	0.010883	VACV			FALSE
20221007_MS_MRMhr_DC24_VACV_53C_r3.wiff	53C_r3	YAPVSPIVI	9	C47H75N9O12	YAPVSPIVI	YAPVSPIVI	YAPVSPIVI	YAPVSPIVI	0.9327	0.9951	#N/A	35.06+/-0.13	#N/A	957.554	2	479.784	#N/A	35.07	463212	335725	127487	1222	1222	0	#N/A	0.008434	VACV			FALSE
20221007_MS_MRMhr_DC24_VACV_57C_r1.wiff	57C_r1	YAPVSPIVI	9	C47H75N9O12	YAPVSPIVI	YAPVSPIVI	YAPVSPIVI	YAPVSPIVI	0.9389	0.9678	#N/A	35.06+/-0.13	#N/A	957.554	2	479.784	#N/A	35.07	131373	79965	51408	1153	1153	0	#N/A	0.003974	VACV			FALSE
20221007_MS_MRMhr_DC24_VACV_57C_r2.wiff	57C_r2	YAPVSPIVI	9	C47H75N9O12	YAPVSPIVI	YAPVSPIVI	YAPVSPIVI	YAPVSPIVI	0.8979	0.9688	#N/A	35.06+/-0.13	#N/A	957.554	2	479.784	#N/A	35.07	103070	64004	39066	0	0	0	#N/A	0.003331	VACV			FALSE
20221007_MS_MRMhr_DC24_VACV_57C_r3.wiff	57C_r3	YAPVSPIVI	9	C47H75N9O12	YAPVSPIVI	YAPVSPIVI	YAPVSPIVI	YAPVSPIVI	0.8975	0.9906	#N/A	35.06+/-0.13	#N/A	957.554	2	479.784	#N/A	35.07	87795	57054	30741	1674	1674	0	#N/A	0.003326	VACV			FALSE
20221007_MS_MRMhr_DC24_VACV_61C_r1.wiff	61C_r1	YAPVSPIVI	9	C47H75N9O12	YAPVSPIVI	YAPVSPIVI	YAPVSPIVI	YAPVSPIVI	0.5349	0.8943	#N/A	35.06+/-0.13	#N/A	957.554	2	479.784	#N/A	35.07	11823	9716	2107	1019	1019	0	#N/A	0.000557	VACV			FALSE
20221007_MS_MRMhr_DC24_VACV_61C_r2.wiff	61C_r2	YAPVSPIVI	9	C47H75N9O12	YAPVSPIVI	YAPVSPIVI	YAPVSPIVI	YAPVSPIVI	0.6615	0.8999	#N/A	35.06+/-0.13	#N/A	957.554	2	479.784	#N/A	35.07	8224	7668	556	1763	1763	0	#N/A	0.000394	VACV			FALSE
20221007_MS_MRMhr_DC24_VACV_61C_r3.wiff	61C_r3	YAPVSPIVI	9	C47H75N9O12	YAPVSPIVI	YAPVSPIVI	YAPVSPIVI	YAPVSPIVI	0.487	0.8243	#N/A	35.06+/-0.13	#N/A	957.554	2	479.784	#N/A	35.07	11427	9626	1801	337	337	0	#N/A	0.00049	VACV			FALSE
20221007_MS_MRMhr_DC24_VACV_65C_r1.wiff	65C_r1	YAPVSPIVI	9	C47H75N9O12	YAPVSPIVI	YAPVSPIVI	YAPVSPIVI	YAPVSPIVI	0	0.8329	#N/A	35.06+/-0.13	#N/A	957.554	2	479.784	#N/A	35.07	2637	2637	0	2155	2155	0	#N/A	âˆž	VACV			FALSE
20221007_MS_MRMhr_DC24_VACV_65C_r2.wiff	65C_r2	YAPVSPIVI	9	C47H75N9O12	YAPVSPIVI	YAPVSPIVI	YAPVSPIVI	YAPVSPIVI	0	0.6208	#N/A	35.06+/-0.13	#N/A	957.554	2	479.784	#N/A	35.07	2543	2543	0	63	63	0	#N/A	âˆž	VACV			FALSE
20221007_MS_MRMhr_DC24_VACV_69C_r1.wiff	69C_r1	YAPVSPIVI	9	C47H75N9O12	YAPVSPIVI	YAPVSPIVI	YAPVSPIVI	YAPVSPIVI	0	0.5802	#N/A	35.06+/-0.13	#N/A	957.554	2	479.784	#N/A	35.07	2536	2536	0	1623	1623	0	#N/A	âˆž	VACV			FALSE
20221007_MS_MRMhr_DC24_VACV_69C_r2.wiff	69C_r2	YAPVSPIVI	9	C47H75N9O12	YAPVSPIVI	YAPVSPIVI	YAPVSPIVI	YAPVSPIVI	0	0.6947	#N/A	35.06+/-0.13	#N/A	957.554	2	479.784	#N/A	35.07	2189	2189	0	1782	1782	0	#N/A	âˆž	VACV			FALSE
20221007_MS_MRMhr_DC24_VACV_69C_r3.wiff	69C_r3	YAPVSPIVI	9	C47H75N9O12	YAPVSPIVI	YAPVSPIVI	YAPVSPIVI	YAPVSPIVI	0	0.8257	#N/A	35.06+/-0.13	#N/A	957.554	2	479.784	#N/A	35.07	3093	3093	0	2280	2280	0	#N/A	âˆž	VACV			FALSE
20221007_MS_MRMhr_DC24_VACV_73C_r1.wiff	73C_r1	YAPVSPIVI	9	C47H75N9O12	YAPVSPIVI	YAPVSPIVI	YAPVSPIVI	YAPVSPIVI	0	0.7057	#N/A	35.06+/-0.13	#N/A	957.554	2	479.784	#N/A	35.07	4048	4048	0	2050	2050	0	#N/A	âˆž	VACV			FALSE
20221007_MS_MRMhr_DC24_VACV_73C_r2.wiff	73C_r2	YAPVSPIVI	9	C47H75N9O12	YAPVSPIVI	YAPVSPIVI	YAPVSPIVI	YAPVSPIVI	0	0.5915	#N/A	35.06+/-0.13	#N/A	957.554	2	479.784	#N/A	35.07	7668	7668	0	0	0	0	#N/A	âˆž	VACV			FALSE
20221007_MS_MRMhr_DC24_VACV_73C_r3.wiff	73C_r3	YAPVSPIVI	9	C47H75N9O12	YAPVSPIVI	YAPVSPIVI	YAPVSPIVI	YAPVSPIVI	0	0.6516	#N/A	35.06+/-0.13	#N/A	957.554	2	479.784	#N/A	35.07	3720	3720	0	1495	1495	0	#N/A	âˆž	VACV			FALSE
20221010_MS_zenoSWATH_DC24_VACV_37C_r1.wiff	SWATH_r1	AIVNYANL	8	C40H64N10O12	AIVNYANL	AIVNYANL	AIVNYANL	AIVNYANL	0.9767	0.9835	#N/A	28.38+/-0.13	#N/A	876.471	2	439.243	#N/A	28.49	236951	83491	153460	466	466	0	#N/A	0.001727	VACV			FALSE
20221010_MS_zenoSWATH_DC24_VACV_37C_r2.wiff	SWATH_r2	AIVNYANL	8	C40H64N10O12	AIVNYANL	AIVNYANL	AIVNYANL	AIVNYANL	0.9791	0.9945	#N/A	28.38+/-0.13	#N/A	876.471	2	439.243	#N/A	28.49	184539	69363	115176	942	942	0	#N/A	0.001912	VACV			FALSE
20221010_MS_zenoSWATH_DC24_VACV_37C_r3.wiff	SWATH_r3	AIVNYANL	8	C40H64N10O12	AIVNYANL	AIVNYANL	AIVNYANL	AIVNYANL	0.9701	0.9967	#N/A	28.38+/-0.13	#N/A	876.471	2	439.243	#N/A	28.49	163835	58226	105609	246	246	0	#N/A	0.001435	VACV			FALSE
20221007_MS_MRMhr_DC24_VACV_37C_r1.wiff	37C_r1	AIVNYANL	8	C40H64N10O12	AIVNYANL	AIVNYANL	AIVNYANL	AIVNYANL	0.9605	0.9871	#N/A	28.38+/-0.13	#N/A	876.471	2	439.243	#N/A	28.49	162182	133464	28717	0	0	0	#N/A	0.001369	VACV			FALSE
20221007_MS_MRMhr_DC24_VACV_37C_r2.wiff	37C_r2	AIVNYANL	8	C40H64N10O12	AIVNYANL	AIVNYANL	AIVNYANL	AIVNYANL	0.886	0.9904	#N/A	28.38+/-0.13	#N/A	876.471	2	439.243	#N/A	28.49	197006	160314	36692	2325	2325	0	#N/A	0.001645	VACV			FALSE
20221007_MS_MRMhr_DC24_VACV_37C_r3.wiff	37C_r3	AIVNYANL	8	C40H64N10O12	AIVNYANL	AIVNYANL	AIVNYANL	AIVNYANL	0.886	0.9918	#N/A	28.38+/-0.13	#N/A	876.471	2	439.243	#N/A	28.49	149106	123470	25636	2215	2215	0	#N/A	0.001495	VACV			FALSE
20221007_MS_MRMhr_DC24_VACV_41C_r1.wiff	41C_r1	AIVNYANL	8	C40H64N10O12	AIVNYANL	AIVNYANL	AIVNYANL	AIVNYANL	0.916	0.9933	#N/A	28.38+/-0.13	#N/A	876.471	2	439.243	#N/A	28.49	129078	108976	20102	2311	2311	0	#N/A	0.001819	VACV			FALSE
20221007_MS_MRMhr_DC24_VACV_41C_r2.wiff	41C_r2	AIVNYANL	8	C40H64N10O12	AIVNYANL	AIVNYANL	AIVNYANL	AIVNYANL	0.9458	0.9959	#N/A	28.38+/-0.13	#N/A	876.471	2	439.243	#N/A	28.49	185848	155282	30566	3320	3320	0	#N/A	0.001639	VACV			FALSE
20221007_MS_MRMhr_DC24_VACV_41C_r3.wiff	41C_r3	AIVNYANL	8	C40H64N10O12	AIVNYANL	AIVNYANL	AIVNYANL	AIVNYANL	0.8576	0.9976	#N/A	28.38+/-0.13	#N/A	876.471	2	439.243	#N/A	28.49	179918	148202	31716	2614	2614	0	#N/A	0.001396	VACV			FALSE
20221007_MS_MRMhr_DC24_VACV_45C_r1.wiff	45C_r1	AIVNYANL	8	C40H64N10O12	AIVNYANL	AIVNYANL	AIVNYANL	AIVNYANL	0.8619	0.9948	#N/A	28.38+/-0.13	#N/A	876.471	2	439.243	#N/A	28.49	125106	102929	22177	803	803	0	#N/A	0.001306	VACV			FALSE
20221007_MS_MRMhr_DC24_VACV_45C_r2.wiff	45C_r2	AIVNYANL	8	C40H64N10O12	AIVNYANL	AIVNYANL	AIVNYANL	AIVNYANL	0.9112	0.9877	#N/A	28.38+/-0.13	#N/A	876.471	2	439.243	#N/A	28.49	138182	114720	23463	2854	2854	0	#N/A	0.001353	VACV			FALSE
20221007_MS_MRMhr_DC24_VACV_45C_r3.wiff	45C_r3	AIVNYANL	8	C40H64N10O12	AIVNYANL	AIVNYANL	AIVNYANL	AIVNYANL	0.791	0.9837	#N/A	28.38+/-0.13	#N/A	876.471	2	439.243	#N/A	28.49	149063	117398	31665	3241	3241	0	#N/A	0.001351	VACV			FALSE
20221007_MS_MRMhr_DC24_VACV_49C_r1.wiff	49C_r1	AIVNYANL	8	C40H64N10O12	AIVNYANL	AIVNYANL	AIVNYANL	AIVNYANL	0.7688	0.99	#N/A	28.38+/-0.13	#N/A	876.471	2	439.243	#N/A	28.49	83889	71815	12074	2958	2958	0	#N/A	0.001393	VACV			FALSE
20221007_MS_MRMhr_DC24_VACV_49C_r2.wiff	49C_r2	AIVNYANL	8	C40H64N10O12	AIVNYANL	AIVNYANL	AIVNYANL	AIVNYANL	0.8424	0.9888	#N/A	28.38+/-0.13	#N/A	876.471	2	439.243	#N/A	28.49	94355	80052	14302	3397	3397	0	#N/A	0.001225	VACV			FALSE
20221007_MS_MRMhr_DC24_VACV_49C_r3.wiff	49C_r3	AIVNYANL	8	C40H64N10O12	AIVNYANL	AIVNYANL	AIVNYANL	AIVNYANL	0.8119	0.9877	#N/A	28.38+/-0.13	#N/A	876.471	2	439.243	#N/A	28.49	85461	72506	12955	3353	3353	0	#N/A	0.001382	VACV			FALSE
20221007_MS_MRMhr_DC24_VACV_53C_r1.wiff	53C_r1	AIVNYANL	8	C40H64N10O12	AIVNYANL	AIVNYANL	AIVNYANL	AIVNYANL	0.609	0.9813	#N/A	28.38+/-0.13	#N/A	876.471	2	439.243	#N/A	28.49	45584	39569	6016	826	826	0	#N/A	0.000767	VACV			FALSE
20221007_MS_MRMhr_DC24_VACV_53C_r2.wiff	53C_r2	AIVNYANL	8	C40H64N10O12	AIVNYANL	AIVNYANL	AIVNYANL	AIVNYANL	0.8883	0.9703	#N/A	28.38+/-0.13	#N/A	876.471	2	439.243	#N/A	28.49	64887	55314	9573	944	944	0	#N/A	0.001515	VACV			FALSE
20221007_MS_MRMhr_DC24_VACV_53C_r3.wiff	53C_r3	AIVNYANL	8	C40H64N10O12	AIVNYANL	AIVNYANL	AIVNYANL	AIVNYANL	0.6063	0.9928	#N/A	28.38+/-0.13	#N/A	876.471	2	439.243	#N/A	28.49	51558	47116	4442	2687	2687	0	#N/A	0.000939	VACV			FALSE
20221007_MS_MRMhr_DC24_VACV_57C_r1.wiff	57C_r1	AIVNYANL	8	C40H64N10O12	AIVNYANL	AIVNYANL	AIVNYANL	AIVNYANL	0	0.9034	#N/A	28.38+/-0.13	#N/A	876.471	2	439.243	#N/A	28.49	12861	12861	0	0	0	0	#N/A	0.000389	VACV			FALSE
20221007_MS_MRMhr_DC24_VACV_57C_r2.wiff	57C_r2	AIVNYANL	8	C40H64N10O12	AIVNYANL	AIVNYANL	AIVNYANL	AIVNYANL	0	0.9117	#N/A	28.38+/-0.13	#N/A	876.471	2	439.243	#N/A	28.49	10871	10871	0	0	0	0	#N/A	0.000351	VACV			FALSE
20221007_MS_MRMhr_DC24_VACV_57C_r3.wiff	57C_r3	AIVNYANL	8	C40H64N10O12	AIVNYANL	AIVNYANL	AIVNYANL	AIVNYANL	0.366	0.8671	#N/A	28.38+/-0.13	#N/A	876.471	2	439.243	#N/A	28.49	8335	8159	176	2937	2937	0	#N/A	0.000316	VACV			FALSE
20221007_MS_MRMhr_DC24_VACV_61C_r1.wiff	61C_r1	AIVNYANL	8	C40H64N10O12	AIVNYANL	AIVNYANL	AIVNYANL	AIVNYANL	0	0.9466	#N/A	28.38+/-0.13	#N/A	876.471	2	439.243	#N/A	28.49	3871	3871	0	4284	4284	0	#N/A	0.000182	VACV			FALSE
20221007_MS_MRMhr_DC24_VACV_61C_r2.wiff	61C_r2	AIVNYANL	8	C40H64N10O12	AIVNYANL	AIVNYANL	AIVNYANL	AIVNYANL	0	0.7495	#N/A	28.38+/-0.13	#N/A	876.471	2	439.243	#N/A	28.49	4017	4017	0	4360	4360	0	#N/A	0.000193	VACV			FALSE
20221007_MS_MRMhr_DC24_VACV_61C_r3.wiff	61C_r3	AIVNYANL	8	C40H64N10O12	AIVNYANL	AIVNYANL	AIVNYANL	AIVNYANL	0	0.9179	#N/A	28.38+/-0.13	#N/A	876.471	2	439.243	#N/A	28.49	8478	8478	0	45	45	0	#N/A	0.000364	VACV			FALSE
20221007_MS_MRMhr_DC24_VACV_65C_r1.wiff	65C_r1	AIVNYANL	8	C40H64N10O12	AIVNYANL	AIVNYANL	AIVNYANL	AIVNYANL	0	0.7549	#N/A	28.38+/-0.13	#N/A	876.471	2	439.243	#N/A	28.49	3135	3135	0	4542	4542	0	#N/A	âˆž	VACV			FALSE
20221007_MS_MRMhr_DC24_VACV_65C_r2.wiff	65C_r2	AIVNYANL	8	C40H64N10O12	AIVNYANL	AIVNYANL	AIVNYANL	AIVNYANL	0	0.4326	#N/A	28.38+/-0.13	#N/A	876.471	2	439.243	#N/A	28.49	1972	1972	0	3117	3117	0	#N/A	âˆž	VACV			FALSE
20221007_MS_MRMhr_DC24_VACV_69C_r1.wiff	69C_r1	AIVNYANL	8	C40H64N10O12	AIVNYANL	AIVNYANL	AIVNYANL	AIVNYANL	0	0.7992	#N/A	28.38+/-0.13	#N/A	876.471	2	439.243	#N/A	28.49	5956	5956	0	78	78	0	#N/A	âˆž	VACV			FALSE
20221007_MS_MRMhr_DC24_VACV_69C_r2.wiff	69C_r2	AIVNYANL	8	C40H64N10O12	AIVNYANL	AIVNYANL	AIVNYANL	AIVNYANL	0	0.7645	#N/A	28.38+/-0.13	#N/A	876.471	2	439.243	#N/A	28.49	3945	3945	0	719	719	0	#N/A	âˆž	VACV			FALSE
20221007_MS_MRMhr_DC24_VACV_69C_r3.wiff	69C_r3	AIVNYANL	8	C40H64N10O12	AIVNYANL	AIVNYANL	AIVNYANL	AIVNYANL	0	0.8094	#N/A	28.38+/-0.13	#N/A	876.471	2	439.243	#N/A	28.49	6347	6347	0	225	225	0	#N/A	âˆž	VACV			FALSE
20221007_MS_MRMhr_DC24_VACV_73C_r1.wiff	73C_r1	AIVNYANL	8	C40H64N10O12	AIVNYANL	AIVNYANL	AIVNYANL	AIVNYANL	0	0.6988	#N/A	28.38+/-0.13	#N/A	876.471	2	439.243	#N/A	28.49	1884	1884	0	3806	3806	0	#N/A	âˆž	VACV			FALSE
20221007_MS_MRMhr_DC24_VACV_73C_r2.wiff	73C_r2	AIVNYANL	8	C40H64N10O12	AIVNYANL	AIVNYANL	AIVNYANL	AIVNYANL	0	0.6938	#N/A	28.38+/-0.13	#N/A	876.471	2	439.243	#N/A	28.49	2148	2148	0	5638	5638	0	#N/A	âˆž	VACV			FALSE
20221007_MS_MRMhr_DC24_VACV_73C_r3.wiff	73C_r3	AIVNYANL	8	C40H64N10O12	AIVNYANL	AIVNYANL	AIVNYANL	AIVNYANL	0	0.8973	#N/A	28.38+/-0.13	#N/A	876.471	2	439.243	#N/A	28.49	4757	4757	0	2437	2437	0	#N/A	âˆž	VACV			FALSE
20221010_MS_zenoSWATH_DC24_VACV_37C_r1.wiff	SWATH_r1	SAPMNVDNLI	10	C45H76N12O16S	SAPMNVDNLI	SAPMNVDNLI	SAPMNVDNLI	SAPMNVDNLI	0.9638	0.8023	#N/A	33.38+/-0.13	#N/A	1072.52	2	537.268	#N/A	33.36	175396	138275	37121	8229	8229	0	#N/A	0.001278	VACV			FALSE
20221010_MS_zenoSWATH_DC24_VACV_37C_r2.wiff	SWATH_r2	SAPMNVDNLI	10	C45H76N12O16S	SAPMNVDNLI	SAPMNVDNLI	SAPMNVDNLI	SAPMNVDNLI	0.9478	0.9806	#N/A	33.38+/-0.13	#N/A	1072.52	2	537.268	#N/A	33.36	392987	177900	215087	8400	6939	1461	#N/A	0.004072	VACV			FALSE
20221010_MS_zenoSWATH_DC24_VACV_37C_r3.wiff	SWATH_r3	SAPMNVDNLI	10	C45H76N12O16S	SAPMNVDNLI	SAPMNVDNLI	SAPMNVDNLI	SAPMNVDNLI	0.9238	0.7457	#N/A	33.38+/-0.13	#N/A	1072.52	2	537.268	#N/A	33.36	273822	238661	35161	12662	12662	0	#N/A	0.002399	VACV			FALSE
20221007_MS_MRMhr_DC24_VACV_37C_r1.wiff	37C_r1	SAPMNVDNLI	10	C45H76N12O16S	SAPMNVDNLI	SAPMNVDNLI	SAPMNVDNLI	SAPMNVDNLI	0.8878	0.7644	#N/A	33.38+/-0.13	#N/A	1072.52	2	537.268	#N/A	33.36	518509	457433	61076	15945	15945	0	#N/A	0.004377	VACV			FALSE
20221007_MS_MRMhr_DC24_VACV_37C_r2.wiff	37C_r2	SAPMNVDNLI	10	C45H76N12O16S	SAPMNVDNLI	SAPMNVDNLI	SAPMNVDNLI	SAPMNVDNLI	0.9414	0.9408	#N/A	33.38+/-0.13	#N/A	1072.52	2	537.268	#N/A	33.36	1087190	669341	417848	35260	35260	0	#N/A	0.00908	VACV			FALSE
20221007_MS_MRMhr_DC24_VACV_37C_r3.wiff	37C_r3	SAPMNVDNLI	10	C45H76N12O16S	SAPMNVDNLI	SAPMNVDNLI	SAPMNVDNLI	SAPMNVDNLI	0.9361	0.7733	#N/A	33.38+/-0.13	#N/A	1072.52	2	537.268	#N/A	33.36	498340	442272	56068	36994	36994	0	#N/A	0.004996	VACV			FALSE
20221007_MS_MRMhr_DC24_VACV_41C_r1.wiff	41C_r1	SAPMNVDNLI	10	C45H76N12O16S	SAPMNVDNLI	SAPMNVDNLI	SAPMNVDNLI	SAPMNVDNLI	0.9403	0.8788	#N/A	33.38+/-0.13	#N/A	1072.52	2	537.268	#N/A	33.36	732984	520314	212670	18519	18519	0	#N/A	0.010329	VACV			FALSE
20221007_MS_MRMhr_DC24_VACV_41C_r2.wiff	41C_r2	SAPMNVDNLI	10	C45H76N12O16S	SAPMNVDNLI	SAPMNVDNLI	SAPMNVDNLI	SAPMNVDNLI	0.9839	0.8732	#N/A	33.38+/-0.13	#N/A	1072.52	2	537.268	#N/A	33.36	966394	689675	276718	34287	34287	0	#N/A	0.008521	VACV			FALSE
20221007_MS_MRMhr_DC24_VACV_41C_r3.wiff	41C_r3	SAPMNVDNLI	10	C45H76N12O16S	SAPMNVDNLI	SAPMNVDNLI	SAPMNVDNLI	SAPMNVDNLI	0.9626	0.8325	#N/A	33.38+/-0.13	#N/A	1072.52	2	537.268	#N/A	33.36	978805	771244	207561	24034	24034	0	#N/A	0.007596	VACV			FALSE
20221007_MS_MRMhr_DC24_VACV_45C_r1.wiff	45C_r1	SAPMNVDNLI	10	C45H76N12O16S	SAPMNVDNLI	SAPMNVDNLI	SAPMNVDNLI	SAPMNVDNLI	0.919	0.8349	#N/A	33.38+/-0.13	#N/A	1072.52	2	537.268	#N/A	33.36	569394	446984	122410	21478	21478	0	#N/A	0.005942	VACV			FALSE
20221007_MS_MRMhr_DC24_VACV_45C_r2.wiff	45C_r2	SAPMNVDNLI	10	C45H76N12O16S	SAPMNVDNLI	SAPMNVDNLI	SAPMNVDNLI	SAPMNVDNLI	0.9554	0.8705	#N/A	33.38+/-0.13	#N/A	1072.52	2	537.268	#N/A	33.36	877070	632606	244464	36776	36776	0	#N/A	0.008591	VACV			FALSE
20221007_MS_MRMhr_DC24_VACV_45C_r3.wiff	45C_r3	SAPMNVDNLI	10	C45H76N12O16S	SAPMNVDNLI	SAPMNVDNLI	SAPMNVDNLI	SAPMNVDNLI	0.8877	0.8385	#N/A	33.38+/-0.13	#N/A	1072.52	2	537.268	#N/A	33.36	764625	577202	187423	27752	27752	0	#N/A	0.006931	VACV			FALSE
20221007_MS_MRMhr_DC24_VACV_49C_r1.wiff	49C_r1	SAPMNVDNLI	10	C45H76N12O16S	SAPMNVDNLI	SAPMNVDNLI	SAPMNVDNLI	SAPMNVDNLI	0.9577	0.9432	#N/A	33.38+/-0.13	#N/A	1072.52	2	537.268	#N/A	33.36	726300	450606	275694	25094	25094	0	#N/A	0.012057	VACV			FALSE
20221007_MS_MRMhr_DC24_VACV_49C_r2.wiff	49C_r2	SAPMNVDNLI	10	C45H76N12O16S	SAPMNVDNLI	SAPMNVDNLI	SAPMNVDNLI	SAPMNVDNLI	0.9454	0.9209	#N/A	33.38+/-0.13	#N/A	1072.52	2	537.268	#N/A	33.36	447686	317498	130189	25842	25842	0	#N/A	0.005811	VACV			FALSE
20221007_MS_MRMhr_DC24_VACV_49C_r3.wiff	49C_r3	SAPMNVDNLI	10	C45H76N12O16S	SAPMNVDNLI	SAPMNVDNLI	SAPMNVDNLI	SAPMNVDNLI	0.9425	0.9203	#N/A	33.38+/-0.13	#N/A	1072.52	2	537.268	#N/A	33.36	524539	334470	190069	22839	22839	0	#N/A	0.008485	VACV			FALSE
20221007_MS_MRMhr_DC24_VACV_53C_r1.wiff	53C_r1	SAPMNVDNLI	10	C45H76N12O16S	SAPMNVDNLI	SAPMNVDNLI	SAPMNVDNLI	SAPMNVDNLI	0.9285	0.9336	#N/A	33.38+/-0.13	#N/A	1072.52	2	537.268	#N/A	33.36	90679	69463	21217	9888	9888	0	#N/A	0.001525	VACV			FALSE
20221007_MS_MRMhr_DC24_VACV_53C_r2.wiff	53C_r2	SAPMNVDNLI	10	C45H76N12O16S	SAPMNVDNLI	SAPMNVDNLI	SAPMNVDNLI	SAPMNVDNLI	0.9243	0.9012	#N/A	33.38+/-0.13	#N/A	1072.52	2	537.268	#N/A	33.36	284663	188318	96344	10732	10732	0	#N/A	0.006648	VACV			FALSE
20221007_MS_MRMhr_DC24_VACV_53C_r3.wiff	53C_r3	SAPMNVDNLI	10	C45H76N12O16S	SAPMNVDNLI	SAPMNVDNLI	SAPMNVDNLI	SAPMNVDNLI	0.911	0.8856	#N/A	33.38+/-0.13	#N/A	1072.52	2	537.268	#N/A	33.36	195544	133090	62454	16535	16535	0	#N/A	0.00356	VACV			FALSE
20221007_MS_MRMhr_DC24_VACV_57C_r1.wiff	57C_r1	SAPMNVDNLI	10	C45H76N12O16S	SAPMNVDNLI	SAPMNVDNLI	SAPMNVDNLI	SAPMNVDNLI	0.9259	0.9338	#N/A	33.38+/-0.13	#N/A	1072.52	2	537.268	#N/A	33.36	221758	156566	65192	10113	10113	0	#N/A	0.006708	VACV			FALSE
20221007_MS_MRMhr_DC24_VACV_57C_r2.wiff	57C_r2	SAPMNVDNLI	10	C45H76N12O16S	SAPMNVDNLI	SAPMNVDNLI	SAPMNVDNLI	SAPMNVDNLI	0.7168	0.8264	#N/A	33.38+/-0.13	#N/A	1072.52	2	537.268	#N/A	33.36	157562	138454	19107	10062	10062	0	#N/A	0.005092	VACV			FALSE
20221007_MS_MRMhr_DC24_VACV_57C_r3.wiff	57C_r3	SAPMNVDNLI	10	C45H76N12O16S	SAPMNVDNLI	SAPMNVDNLI	SAPMNVDNLI	SAPMNVDNLI	0.9335	0.8847	#N/A	33.38+/-0.13	#N/A	1072.52	2	537.268	#N/A	33.36	180239	143391	36848	225	225	0	#N/A	0.006828	VACV			FALSE
20221007_MS_MRMhr_DC24_VACV_61C_r1.wiff	61C_r1	SAPMNVDNLI	10	C45H76N12O16S	SAPMNVDNLI	SAPMNVDNLI	SAPMNVDNLI	SAPMNVDNLI	0.563	0.7812	#N/A	33.38+/-0.13	#N/A	1072.52	2	537.268	#N/A	33.36	115572	107820	7752	0	0	0	#N/A	0.005448	VACV			FALSE
20221007_MS_MRMhr_DC24_VACV_61C_r2.wiff	61C_r2	SAPMNVDNLI	10	C45H76N12O16S	SAPMNVDNLI	SAPMNVDNLI	SAPMNVDNLI	SAPMNVDNLI	0.2168	0.7161	#N/A	33.38+/-0.13	#N/A	1072.52	2	537.268	#N/A	33.36	89991	89520	471	5884	5884	0	#N/A	0.004314	VACV			FALSE
20221007_MS_MRMhr_DC24_VACV_61C_r3.wiff	61C_r3	SAPMNVDNLI	10	C45H76N12O16S	SAPMNVDNLI	SAPMNVDNLI	SAPMNVDNLI	SAPMNVDNLI	0.7774	0.781	#N/A	33.38+/-0.13	#N/A	1072.52	2	537.268	#N/A	33.36	101873	97465	4409	1251	1251	0	#N/A	0.004372	VACV			FALSE
20221007_MS_MRMhr_DC24_VACV_65C_r1.wiff	65C_r1	SAPMNVDNLI	10	C45H76N12O16S	SAPMNVDNLI	SAPMNVDNLI	SAPMNVDNLI	SAPMNVDNLI	0	0.6967	#N/A	33.38+/-0.13	#N/A	1072.52	2	537.268	#N/A	33.36	59586	59586	0	927	927	0	#N/A	âˆž	VACV			FALSE
20221007_MS_MRMhr_DC24_VACV_65C_r2.wiff	65C_r2	SAPMNVDNLI	10	C45H76N12O16S	SAPMNVDNLI	SAPMNVDNLI	SAPMNVDNLI	SAPMNVDNLI	0	0.7235	#N/A	33.38+/-0.13	#N/A	1072.52	2	537.268	#N/A	33.36	32940	32940	0	987	987	0	#N/A	âˆž	VACV			FALSE
20221007_MS_MRMhr_DC24_VACV_69C_r1.wiff	69C_r1	SAPMNVDNLI	10	C45H76N12O16S	SAPMNVDNLI	SAPMNVDNLI	SAPMNVDNLI	SAPMNVDNLI	0	0.7977	#N/A	33.38+/-0.13	#N/A	1072.52	2	537.268	#N/A	33.36	13369	13369	0	0	0	0	#N/A	âˆž	VACV			FALSE
20221007_MS_MRMhr_DC24_VACV_69C_r2.wiff	69C_r2	SAPMNVDNLI	10	C45H76N12O16S	SAPMNVDNLI	SAPMNVDNLI	SAPMNVDNLI	SAPMNVDNLI	0.3638	0.6124	#N/A	33.38+/-0.13	#N/A	1072.52	2	537.268	#N/A	33.36	18155	17199	956	5955	5955	0	#N/A	âˆž	VACV			FALSE
20221007_MS_MRMhr_DC24_VACV_69C_r3.wiff	69C_r3	SAPMNVDNLI	10	C45H76N12O16S	SAPMNVDNLI	SAPMNVDNLI	SAPMNVDNLI	SAPMNVDNLI	0	0.7571	#N/A	33.38+/-0.13	#N/A	1072.52	2	537.268	#N/A	33.36	25304	25304	0	1594	1594	0	#N/A	âˆž	VACV			FALSE
20221007_MS_MRMhr_DC24_VACV_73C_r1.wiff	73C_r1	SAPMNVDNLI	10	C45H76N12O16S	SAPMNVDNLI	SAPMNVDNLI	SAPMNVDNLI	SAPMNVDNLI	0	0.7907	#N/A	33.38+/-0.13	#N/A	1072.52	2	537.268	#N/A	33.36	14260	14260	0	0	0	0	#N/A	âˆž	VACV			FALSE
20221007_MS_MRMhr_DC24_VACV_73C_r2.wiff	73C_r2	SAPMNVDNLI	10	C45H76N12O16S	SAPMNVDNLI	SAPMNVDNLI	SAPMNVDNLI	SAPMNVDNLI	0.5302	0.7213	#N/A	33.38+/-0.13	#N/A	1072.52	2	537.268	#N/A	33.36	9427	8498	929	0	0	0	#N/A	âˆž	VACV			FALSE
20221007_MS_MRMhr_DC24_VACV_73C_r3.wiff	73C_r3	SAPMNVDNLI	10	C45H76N12O16S	SAPMNVDNLI	SAPMNVDNLI	SAPMNVDNLI	SAPMNVDNLI	0	0.6851	#N/A	33.38+/-0.13	#N/A	1072.52	2	537.268	#N/A	33.36	20234	20234	0	146	146	0	#N/A	âˆž	VACV			FALSE
20221010_MS_zenoSWATH_DC24_VACV_37C_r1.wiff	SWATH_r1	SAPMNVDNLI	10	C45H76N12O17S	SAPM[+16]NVDNLI	SAPM(unimod:35)NVDNLI	SAPM[Oxi]NVDNLI	SAPM[Oxidation (M)]NVDNLI	0.9526	0.9859	#N/A	27.14+/-0.09	#N/A	1088.52	2	545.266	#N/A	27.13	1226967	545559	681408	23406	17038	6368	#N/A	0.00894	VACV			FALSE
20221010_MS_zenoSWATH_DC24_VACV_37C_r2.wiff	SWATH_r2	SAPMNVDNLI	10	C45H76N12O17S	SAPM[+16]NVDNLI	SAPM(unimod:35)NVDNLI	SAPM[Oxi]NVDNLI	SAPM[Oxidation (M)]NVDNLI	0.9549	0.9866	#N/A	27.14+/-0.09	#N/A	1088.52	2	545.266	#N/A	27.13	549957	240976	308981	2483	726	1756	#N/A	0.005698	VACV			FALSE
20221010_MS_zenoSWATH_DC24_VACV_37C_r3.wiff	SWATH_r3	SAPMNVDNLI	10	C45H76N12O17S	SAPM[+16]NVDNLI	SAPM(unimod:35)NVDNLI	SAPM[Oxi]NVDNLI	SAPM[Oxidation (M)]NVDNLI	0.9518	0.9843	#N/A	27.14+/-0.09	#N/A	1088.52	2	545.266	#N/A	27.13	918482	379864	538618	20037	11983	8054	#N/A	0.008046	VACV			FALSE
20221007_MS_MRMhr_DC24_VACV_37C_r1.wiff	37C_r1	SAPMNVDNLI	10	C45H76N12O17S	SAPM[+16]NVDNLI	SAPM(unimod:35)NVDNLI	SAPM[Oxi]NVDNLI	SAPM[Oxidation (M)]NVDNLI	0	0.9814	#N/A	27.14+/-0.09	#N/A	1088.52	2	545.266	#N/A	27.13	909261	909261	#N/A	18371	18371	#N/A	#N/A	0.007676	VACV			FALSE
20221007_MS_MRMhr_DC24_VACV_37C_r2.wiff	37C_r2	SAPMNVDNLI	10	C45H76N12O17S	SAPM[+16]NVDNLI	SAPM(unimod:35)NVDNLI	SAPM[Oxi]NVDNLI	SAPM[Oxidation (M)]NVDNLI	0	0.9786	#N/A	27.14+/-0.09	#N/A	1088.52	2	545.266	#N/A	27.13	536903	536903	#N/A	0	0	#N/A	#N/A	0.004484	VACV			FALSE
20221007_MS_MRMhr_DC24_VACV_37C_r3.wiff	37C_r3	SAPMNVDNLI	10	C45H76N12O17S	SAPM[+16]NVDNLI	SAPM(unimod:35)NVDNLI	SAPM[Oxi]NVDNLI	SAPM[Oxidation (M)]NVDNLI	0	0.9915	#N/A	27.14+/-0.09	#N/A	1088.52	2	545.266	#N/A	27.13	809347	809347	#N/A	15445	15445	#N/A	#N/A	0.008115	VACV			FALSE
20221007_MS_MRMhr_DC24_VACV_41C_r1.wiff	41C_r1	SAPMNVDNLI	10	C45H76N12O17S	SAPM[+16]NVDNLI	SAPM(unimod:35)NVDNLI	SAPM[Oxi]NVDNLI	SAPM[Oxidation (M)]NVDNLI	0	0.9909	#N/A	27.14+/-0.09	#N/A	1088.52	2	545.266	#N/A	27.13	808745	808745	#N/A	14628	14628	#N/A	#N/A	0.011397	VACV			FALSE
20221007_MS_MRMhr_DC24_VACV_41C_r2.wiff	41C_r2	SAPMNVDNLI	10	C45H76N12O17S	SAPM[+16]NVDNLI	SAPM(unimod:35)NVDNLI	SAPM[Oxi]NVDNLI	SAPM[Oxidation (M)]NVDNLI	0	0.9887	#N/A	27.14+/-0.09	#N/A	1088.52	2	545.266	#N/A	27.13	1061310	1061310	#N/A	14136	14136	#N/A	#N/A	0.009358	VACV			FALSE
[truncated: 4,920 more rows]
