# Supplementary material for: Mass spectrometry-based thermostability profiling of virus-derived MHC peptide complexes serves as an effective predictor of immunogenicity
Source: Research Square preprint supplement (doi:10.21203/rs.3.rs-5824434/v1), 2025-02-03
Supplement: Supplementary file 3 [file 485162d263efbcfe36d3e18c.xlsx]

## Sheet: DDA DB search
Peptide Sequence	Length				from MSBooster-assisted MSFragger DDA database search
GKSPLPSL	8
AMADTFLEHM	10
VVYIYKEHF	9
SSFAFAGL	8
NYVYAGL	7
ATISHATV	8
SALHTSAL	8
IIEKYYTRL	9
VFPVLPQ	7
AVFPSIVGRPR	11
KQLPLVKPYL	10
INRGVKI	7
PVNTEIK	7
PVTGLDAK	8
LGLSPDKA	8
APRSGLSL	8
SAVRPASL	8
SLGSALRP	8
VKNVDII	7
IVLSQAGL	8
VKVNDLL	7
ATFGTASM	8
SGFSFGTV	8
SVYGFTGA	8
GIAGFSHL	8
EITALAPS	8
FGYNIPLKHL	10
TSPTNAKLEKL	11
RFPATLP	7
RSLLNKQETL	10
KEVNKAL	7
VLVSLTGL	8
TLVLSRI	7
EVGSIIGK	8
LGPLFKK	7
SIRNFTESHL	10
GNEQVTR	7
PSNLPYL	7
VGSTNRIG	8
AVGSGSRGL	9
GAKGGIMAV	9
SVIVVSTV	8
SVLVVSSL	8
DHIPLPL	7
KYSHVDLVVM	10
VSFSKSGRLLL	11
KGIGMGNL	8
DSKETIL	7
VGVNGFGR	8
SAPLFTGL	8
AGILFATL	8
VAVIFSGL	8
IGFIKLD	7
IVMKSIV	7
IVNPHLL	7
NAPTFGSL	8
MQASIEK	7
VNATFAAL	8
VGIGFSNL	8
GGFRVASL	8
AVAKFTGI	8
RMPEKVTWM	9
RVMEYINRL	9
EFIRNQEQM	9
IMYDKHIQM	9
SGPKFNSA	8
SPKFSEL	7
EYIRGGI	7
IQFVSTL	7
ILSFTNL	7
VGPRVGLARAQS	12
PTNLIHL	7
SLVNNFL	7
SAIAFSNV	8
YGLKNLT	7
SSGDFPSL	8
AMENIKS	7
AADTFTAL	8
SSPPLPVL	8
KIDISKIPNSV	11
FQYRNRIAM	9
AQATYSGL	8
AVEHINK	7
VINQSHL	7
AALENDKTIKL	11
TFIIDPAAVIR	11
SSPSFSSL	8
GTGASGSFK	9
IGMFNLT	7
FTCGGILT	8
AFASLRM	7
LTGMAFR	7
PTDKHTL	7
PAQANVVL	8
AVRGKLGELVDGLVVP	16
IILEFKGRKI	10
PVILASIV	8
SSFNFGGP	8
SDLFPSF	7
AAVVGLVAI	9
HTTKSFSRTPG	11
AVIAHVGM	8
PGPPLPHV	8
SALKPANL	8
VSVLVALL	8
VTTFLSM	7
VKNVAHM	7
SSVPGVRL	8
SLVKVVGL	8
SSMKNFKAFF	10
AAPKAGPGM	9
QSPSANVL	8
PEAFPALA	8
ANIQAVSL	8
IAGTGANVI	9
VTVAGLAGK	9
ATGVNANAV	9
VAPTASTAV	9
SRVPTGTV	8
EIQTAVR	7
VSVSLAQL	8
SVVKLTAV	8
EIYEFHKML	9
APAAHTHI	8
LAGVENSK	8
TYVHKGL	7
SVVEIASL	8
LPAYLKL	7
VSRSSLGL	8
ALLFKNL	7
TQMDYKGQKL	10
KEVDELS	7
SGLLYPGL	8
SHFYPAV	7
GSPATSSTL	9
GPRYTNL	7
AYLFAHV	7
VVNKDVF	7
ISRFANL	7
IHIPINN	7
VAFSVARA	8
NIVHPKL	7
PLNIHKV	7
SSPAYPSL	8
AGSSEPVTGLDAK	13
SSITFPAV	8
VTVRYSP	7
ASYLLAAL	8
SVIVFGSI	8
PLVTLKDIAVY	11
ANIGFSTL	8
TGAVFSKL	8
VTTFKNL	7
KVLGNPKSDEM	11
AGVRNPQQHLN	11
VNYDFGHMHV	10
GGGSNTIAM	9
MAEDIKT	7
HAAENPGK	8
TVEFTNL	7
SVISLASM	8
FMSRTNRPPL	10
LAMAAFPKKQN	11
SVFSGITL	8
GAPQAPVAL	9
IAPNPAQL	8
TAVILGHL	8
FVKGFLL	7
SSSPGGAYV	9
TAFGTGTGL	9
APGSKDHL	8
KALAYQM	7
SAIHAVNL	8
AFKFKAL	7
AFAFKKL	7
VAPVLNVL	8
SAPMNVDNLIM	11
QEFAAML	7
SSTLFSAL	8
INYSFPAKGKL	11
SVVTVAHL	8
VGIGYNGM	8
SALFFGNA	8
IIYSMSI	7
AAATGHTVV	9
AAYKFGVA	8
IDPGGVIR	8
LVRPGTAL	8
VIIGKIAL	8
RNYEYLIRL	9
ILSDDKH	7
AVFGFTSV	8
FASFIDK	7
AYRFTGL	7
ASVVNPGAI	9
AVIHFAGL	8
GVVIFGHV	8
VAPPFVVV	8
HAVSEGTK	8
PFDTVHI	7
MYIFAAL	7
KVDPEIQ	7
AVKFHNL	7
AAPVSATVL	9
VGPTLRSV	8
INLVEKI	7
SLIALAKL	8
MSLRSYG	7
AAYAYSAL	8
SSPELPSL	8
GPSNVDKL	8
SSIHSSVL	8
ASPANVGTL	9
GIGVQGLAD	9
RGPTVSNV	8
IVNFVHT	7
VNIAVTNV	8
VAPGYPLL	8
GLVMAPLL	8
SAVRVGQL	8
AAASRVAAL	9
TLISPSVL	8
AVVELVTV	8
LGLDLVTV	8
AVPIFVAL	8
GTFIIDPGGVIR	12
PVGQLWM	7
SPINVTTV	8
VGLKFPGL	8
YAHENDITHF	10
SGYTFSAV	8
APSSNVASV	9
SNPSAGISV	9
NSIRNLD	7
NNRSLDL	7
SGHLYAAL	8
VSAGYVHV	8
KSYSFIARMK	10
TAGLNVGSL	9
VPPTFSAL	8
ANVRNFGRSLL	11
SGPIFIVV	8
SVVPFIAV	8
AIPAFISL	8
LRLLFGI	7
SAPLGDFRHTM	11
PENAVRM	7
SGVEGADVV	9
SSGINVNAA	9
ANVELSSL	8
AAAKNGTSL	9
GVGKNGSTI	9
ISLTGGSVV	9
VAAVFRGL	8
TAALIVDLRYN	11
DNNRSLD	7
RAVQNHNTYM	10
APGFGDNR	8
IHYGSGSL	8
KAPGMNSL	8
AIQNSTSI	8
SSVQATQL	8
WIHAAHV	7
MVLDINL	7
SDYQRLNLKL	10
ATGTARVHTILQDLGL	16
PGLYLSAL	8
VALLFTGI	8
VSALFALL	8
KLIFLAQ	7
GIILFSAI	8
FKLILAE	7
AGPEYKGL	8
AAPAGTTFV	9
GPRYTQL	7
APHHLFL	7
LRNGVYL	7
SSLVTSKL	8
SFIKAIGV	8
SLGKFGII	8
RSLGNDVKSYL	11
DVLIVVSRHLT	11
ADVTPADF	8
ANVQYAAV	8
QSFGAVNL	8
FIQPMAL	7
GGSKSISIS	9
SAGTGKTTL	9
SLRFVTL	7
RSPENPPSKEL	11
YSLPNAGD	8
GPAGPQGPR	9
SGLNFISV	8
VRYTGAGL	8
MAIFLKN	7
MALLFKN	7
SGLKYVAV	8
SSFKAALL	8
TLAYKKL	7
SGASRGVGF	9
KIYDGLE	7
GIQNVGHI	8
AALIYTSV	8
TSLFAVTV	8
VGISYISV	8
ASVTFSLL	8
ASLYSLAL	8
LLNVEHL	7
SFKKGASL	8
VGNHVAKL	8
TIIALGHL	8
NNRLASY	7
GVANVEHI	8
PFGPPIPN	8
RPPPKPM	7
SSLFKSGI	8
VSAGYTKL	8
FVKKFGL	7
GQLSNGDHHFM	11
ATGPYPSM	8
IAPAFSSM	8
FTKMAEI	7
EVSTYIK	7
FSVFLNI	7
TNHINKL	7
VAVINVGAP	9
SLLLLAPL	8
QMYRTEIRM	9
VQMMTAK	7
GSGLGAEHI	9
ARVFSNF	7
FKKTVAM	7
APIIAVTR	8
FTLVNKKNALI	11
GGPANLEAI	9
AYEFAKL	7
GVVGPQGAR	9
SAPANGILV	9
SAFYIKL	7
TAVVNRVFDKL	11
SVLELPAL	8
QAVLANLL	8
VAALLQNL	8
QFTFSNV	7
AQQHYPV	7
SLANHTSI	8
GGVRNGVAL	9
SRVPLTAV	8
IIIFHSL	7
SAMVFSAM	8
SAYVVASM	8
SSPSNPAAL	9
VSFSYAGL	8
VNNMRFKIEN	10
AALEFHGV	8
AAPTSAARV	9
IINHSFI	7
TLVFHNL	7
AIVSFAHV	8
ANLSVLNL	8
SSPQLAKL	8
AALANATVI	9
GSVLNVAAL	9
AYEFTTL	7
SNIRAGNL	8
LGGNLNRT	8
VAPTSTVAV	9
IRNLDTI	7
GPKNKTSI	8
VWIGGSIL	8
KALELTGL	8
VTVKIGDL	8
TLVTLANI	8
ALTNLTVL	8
VGEVIVTK	8
GQMVNNPKIHL	11
PGPGFSHM	8
VGYGYEGT	8
VSFDFHGRRM	10
AAVAGEDGR	9
AAPQNFTP	8
GSVVNSVAL	9
SLGVNVGSL	9
VSGGVLSNL	9
SVINVSNL	8
YAPVSPIV	8
SGVSLAALK	9
VIPVYVGV	8
SSFAHAQV	8
SSPSSPTAL	9
GSLQNGVTA	9
FVAYPHL	7
SSLLGGDVV	9
TALVSGDAL	9
KERETAL	7
ARDVATTL	8
VIVNSTTL	8
HSNLKHIGNHI	11
PTGTYHGD	8
SAFSFAAM	8
SPVGFGHM	8
SFYGSSSL	8
SSPGYSHL	8
GGLAAGSPAM	10
TSATNGPSL	9
SGGGNLTEI	9
APPAYSEL	8
TVMAPSEL	8
SAVSFHSL	8
AAIQGAVAM	9
GSVLNASTV	9
NDLVSATK	8
ISTIMGPL	8
IISPSAML	8
VHLDQAAFRTL	11
QGPVYKGV	8
GPKNGVYI	8
DSRLPFL	7
NGKGPVYL	8
KSTQTILG	8
SAPIFTVI	8
SLVGFVLL	8
TEWLDGK	7
EAQTRPF	7
ALENTTSI	8
AAADITSSL	9
YVIPDEL	7
SFNLPSAL	8
ATPRFSGL	8
AVLNFTAL	8
SAARFALL	8
TSVKLTSL	8
VKIGVFSV	8
AALIYGKL	8
TGFDKTKLESM	11
FSNASPHRMPL	11
GTFIIDPAAVIR	12
SFQFAHL	7
VAYEAPSL	8
VVIDMSGL	8
KVTMQNL	7
SSNTSLKL	8
AIVEFATV	8
SVVGFVEL	8
VDFLSRL	7
KNGSFANL	8
TFEKGLGV	8
IFGSVTNI	8
SAVVYAQL	8
SFVGLTNL	8
VNYVVSGI	8
IGTIYGNL	8
SVFVASQL	8
IYNEALK	7
GVYEAAKL	8
TSIKSTTL	8
EKSVKFI	7
VAYKVASL	8
SGPTNASAF	9
ANLNYGSL	8
KSGTGIAAM	9
AVTTFEAL	8
SMVVSSLL	8
LGPGPSPNL	9
AAPGPPSAAL	10
VTVVFSTV	8
VSAVYTVL	8
TSVVFVSI	8
TFITVSAL	8
ALLSFTSL	8
VSVLHALL	8
KAPGIIPR	8
SGVDYRGV	8
TAINFSTV	8
TADKYAAL	8
RVYGTGSL	8
AYKFPNL	7
VGIQHSLV	8
SVVALHNL	8
SVVAINHI	8
FSPLNPVRVHI	11
TMMINPF	7
ASVSNGATF	9
SALLFGMV	8
AVYAFLGL	8
VLIPLVSL	8
SSDKYAAL	8
SRYTGASL	8
RTYSLGSA	8
GNVAFPHL	8
TLKATSFS	8
VGTIGGTHI	9
AAATSVHVV	9
RGIVNGAAP	9
AELVLVNP	8
VIYIFTV	7
STFSHHSMVSM	11
SSGTNGVSM	9
ATANFANF	8
GPLGLDHM	8
SSPYFAAL	8
SYTFPQI	7
IGLVYSGM	8
AATSFVLM	8
GLDAASYYAPVR	12
SYYAPVR	7
KRFDVSGYPTL	11
IGGENGPVL	9
AGPDRVAGL	9
GIVPFSHV	8
QVINPTAI	8
VIVAARNL	8
LISLLSKKLDPG	12
AGPSHVAAM	9
IGPTHGQM	8
AGPQGAQEV	9
SGFSFRGV	8
SFRYNGL	7
GGPQNGTLI	9
TAFGYKGL	8
VIAELVNV	8
AALGLLDAI	9
ISLEGKPL	8
SLARLPSL	8
ATTLLPKL	8
KVVKVANV	8
FAYEGRD	7
NPTNAEVL	8
IAPGYHSI	8
LYIKSTMGKPQRLY	14
VIVDANNL	8
SSLTHLSL	8
STLLHTSV	8
GAVVNVADL	9
MLPEAIAI	8
AGPSRTVGL	9
IISFQHL	7
SIANLINL	8
IMGVVPLL	8
IMIALPSL	8
SIARLANI	8
SLIKLNAV	8
IIPVFVGL	8
SLVTNMDKLHL	11
SPHYQNL	7
GGVGNLDNL	9
AAPTNANSL	9
GPNNTRSI	8
TAHAFVNV	8
ALINADEL	8
VSPTGGEVI	9
SAIDLINI	8
ALLNTDLV	8
VSRSPSLL	8
ASLKLTLL	8
PKFEVIDKPQS	11
GQMSNGEHHYI	11
GAPSGQTEL	9
SYKFESV	7
GAGSSEPVTGLDAK	14
SFRYSSL	7
TGATYPHL	8
SAFFFGAL	8
AAIPEFMNLGPL	12
TSQILPSN	8
GDDLQAIK	8
SAPVSLQSA	9
LGGQTNLR	8
INEAGISR	8
SLVNADKL	8
TGPTGSVKI	9
SALTVQQL	8
GSLINVGSL	9
VSINTVNL	8
RAITGASLA	9
LSKTALLN	8
TKSLAVQL	8
SIIKATNL	8
SAIKGLSAL	9
SSLVKVNL	8
ASLVFPLL	8
VAVLFPTL	8
AQYGNILKHVM	11
TSANHAMI	8
SYEFTTL	7
GGNEQVTR	8
STFHAGQL	8
SGPDLSTAL	9
AAGSNQVTL	9
AAPPSFGTL	9
AVPEFQGL	8
AGPVGMVTL	9
AGVSNASRV	9
SMIGPRAL	8
TNIELATV	8
KSQGLSQL	8
ANVPFITV	8
QVVSFPAL	8
ILLMLKN	7
GVVLFRAV	8
VILMSATINISL	12
CYGVDGESDSIM	12
VSFSHDGL	8
TPNNTTTI	8
STINGEQI	8
VNFSPANL	8
GYKFFSL	7
RSGPFGQI	8
GPSLRGAFG	9
TVVNSQTL	8
SITNLSNL	8
SVGLNSTAL	9
SLVELTSL	8
IVVAFAEL	8
VGLIFISL	8
GPENVAEM	8
SAPSADAPM	9
LTEEQKN	7
AAASNTNTL	9
SSVPMLNV	8
AGIERMGL	8
LTPTFHF	7
AIYHIVM	7
GSLASLDSL	9
LAPTFSNL	8
VSAPYGRI	8
SSLSLATAI	9
SNLVFLGL	8
GNIVFVTL	8
SFAPVTKL	8
VNLLFSGL	8
LINKDFL	7
IIVSFVNA	8
KVIGFVSI	8
KVFLISGV	8
IYNHVAM	7
SSTHFATL	8
LSLGNAMAA	9
AVVDFEAL	8
SGPEFTLL	8
KIEFTPE	7
LGTILSMQ	8
SALAFGQGL	9
VAYQVGNL	8
SFVGARNL	8
MALLMRL	7
VFVDLASI	8
TTPVYVAL	8
IGTIFAEL	8
SNALFAKL	8
AVFPFIGL	8
VIATFSLL	8
VITVFSVV	8
SSILFAII	8
IVEEYPD	7
ILANADTM	8
VMNSVVSL	8
RPTYTNL	7
SAVVVYNL	8
GILTFSNL	8
SVSSFPKL	8
STYSHSAL	8
SALGNVTTC	9
EKANTSIC	8
FGGAMTDATALNI	13
SFIGSHAF	8
KAPGFAQM	8
TGTSNTTAI	9
MINPFMI	7
SIANFTNV	8
AAAFNTTVA	9
SNTRFGIA	8
VAVDYVTV	8
SFTEILGV	8
EALSFVSL	8
AVQNIAHL	8
FPSFVRL	7
TLLTFSAL	8
VTVTVAYL	8
VIIEKYYTRL	10
KEKSVKF	7
SISDAENM	8
AAGVGDMVM	9
SNPEFSSV	8
SAYDPSNL	8
SFSLNDAL	8
TSPSAYAGL	9
YEDIAQK	7
MLSNTTAI	8
MVVGFANL	8
QNVNAAHL	8
TTVAFTQV	8
VKNTEYL	7
TALKYSAI	8
ISLKYTAA	8
FVIATSTK	8
VAVIHQSL	8
ALINSHVL	8
AVTGHIRI	8
ALLPGVALL	9
RGPENPKLEML	11
TSPEFTSV	8
TTPTYGDL	8
SGVEFESL	8
AGFGGVGRM	9
VVESFSSL	8
SFIETSAL	8
FTKTEEL	7
SYKNSGVI	8
GVALFTML	8
SLLLFAGM	8
SAVQHVNL	8
STLLFSSL	8
TVALYTSI	8
VIFAFSAL	8
AAPVSGPRL	9
SILALTHL	8
SVISVIHL	8
KFLALYL	7
SSYSPQSL	8
GSGLSGDYI	9
GSLTGADTF	9
SSFRFQP	7
ASFNFLGL	8
AIHNFPAV	8
VSFSKSTI	8
GTLLHTNL	8
ATLSVHQL	8
VSIRPAPE	8
TSPINPYKDHM	11
DITLTSANHAMI	12
RKYEMFAQTL	10
GGSDNYGSL	9
SIYEASSL	8
FEFINSL	7
VSYTVTTV	8
TEAPLNPK	8
GAIGNPEVL	9
AFYSIVGL	8
AIHNSTKV	8
SRIFPHL	7
VAPRSGLAV	9
AGLVFLHL	8
PKAVVKLD	8
AVLALRNL	8
VNVDYSKLKKEGPDF	15
SSPSGGHEI	9
SSFFVNGL	8
VAFGYSNI	8
PMAQPPTL	8
QQPSVAQL	8
KGFTFSAL	8
SGYKFGVL	8
VIPELNGK	8
LAVVNGANI	9
VAPANKTGI	9
VAGGLGRQL	9
VAPASVITI	9
GAIVNGKVL	9
QLIVGVNK	8
AINRGVKI	8
LQNVKRL	7
LQNVIKR	7
SIVPITKL	8
VVTRLVAL	8
SFQNDNYSPSM	11
AFFGPEGF	8
YAYAPSSL	8
VAYENYL	7
SSIEHISV	8
ASPTNPTAI	9
ASPIFTHV	8
GIKNGVHF	8
TGAVNPTVL	9
TGLAPASAAL	10
TLKYSFL	7
SSVRPVNL	8
VGGEALGRL	9
SKLPNTVL	8
IPIGMLVL	8
VFILVPAL	8
AQLQDLKNQHL	11
NGPENVGSV	9
AVGNHDFI	8
VYTFETL	7
SGLSGHTTL	9
LGGNVQRE	8
LNENQVR	7
SGPPMRLV	8
SLPDLTNL	8
AAVLDVDGL	9
TGVVNAQAL	9
AAAENKVAV	9
VSVGNVGQL	9
SALANGRAL	9
VGAKNATLV	9
AMTVLPKL	8
TLIVLTNV	8
VFVKVPAL	8
ISIVLTKV	8
LKILTTAL	8
ANYTNGSF	8
SGFEFTSV	8
SSFVFSTV	8
ESLAFHGL	8
GVYAFGFL	8
TVDGPSGKL	9
SAGLNGEIL	9
SSPVSNVAI	9
SRQEAVAL	8
SSVRQPSL	8
SAAIYHVL	8
TVVNKEAI	8
SAPKSISAL	9
VIGKGGETI	9
VNVRVSSL	8
SAISLRNL	8
ASLTVRNL	8
ISPPIPHL	8
SLVKLNSL	8
AGIKSTIAI	9
VAIVYPLV	8
SAMRNLNGREF	11
SGPDGAEEI	9
SGLVGQENA	9
NAIANASTL	9
SIYPAPQV	8
SYKYSKV	7
SAALPLRM	8
GALAVFPSL	9
SFVKPPSL	8
LPIKYAGL	8
SALPFVKL	8
AVPVFKTL	8
RAVLFVGL	8
SLISITKL	8
MFTDQAQQDVI	11
RTSVALEKNFM	11
VTGFFASM	8
FSPSAQPHGHTF	12
PASGSDAASI	10
GGPTSSEQI	9
DVQLQESG	8
TSYFTSGL	8
RAINNEMAHQL	11
TGVVNGESL	9
SSPANISSL	9
SGVDNAISL	9
TQVEGGATL	9
SSPGNTLSL	9
SGLENTAAL	9
VGPSGAQFL	9
VLFDKATYDKL	11
IAPAYVEL	8
SGLGKSTLI	9
SLKNVTTL	8
ISMVISLL	8
GVVLFNKV	8
TIFSKKNFESL	11
SSHSFVNV	8
SASHFSQL	8
SSTPEEVK	8
GASVNNTTL	9
SAPIFQDV	8
AAGVSVEPF	9
MKANNSVI	8
SSVDLRSL	8
SMLQVVAL	8
VGFNVKNV	8
SGYIPARL	8
GLPRFSSL	8
SMVSLRAL	8
SIKLTDSL	8
VGLTSVTSI	9
SSTVGLVTL	9
SLIRSTSL	8
KGLDFALL	8
VIAYLANI	8
SVLQFLGL	8
VVDKFVGI	8
IALYIGNL	8
VLINFASL	8
GKLFNAII	8
LSGKMLVL	8
SMVKLIGI	8
VVRVFVAS	8
AVVVYGRL	8
SRILFGAL	8
AAFIVSRL	8
TGIKFVVL	8
VIASFKVL	8
AIIAFKTL	8
AMEFNHL	7
IAMEFNH	7
MAHQLYV	7
APQNLSTF	8
VAPEEHPV	8
AVYIFHGA	8
SSDVFPLL	8
SVFIAQNV	8
AALDFKNV	8
ALFKGDNL	8
AIVNYANL	8
SSVKFNPV	8
NIFRTNL	7
VAPHLNNL	8
SQAVFARV	8
LNFAVASR	8
MVRVPFL	7
TIVIMTSL	8
SGLIFNKV	8
TGIIFTLL	8
ATLLYALL	8
VSIVFSLL	8
AAPSSPTTM	9
GSPRYAEV	8
SSVASTDVL	9
SFVELGQV	8
SGPTSLFAV	9
DLGIYANI	8
GVLEYANL	8
IGPRYSSV	8
EGISFRGL	8
VASEFGRL	8
HIYFVSL	7
VYVFHTL	7
MALLGNFL	8
TAISFNLL	8
SGPTYIKL	8
ATYGGIALL	9
ISTMIKGL	8
AVYSLGRL	8
TTAAFIRV	8
TIFVSAKL	8
VHILLQGV	8
SSFSSPHM	8
FGFAHPGM	8
AMSQLAEL	8
VAPEEHPT	8
SSPDYVLV	8
AVKNGDYI	8
SLTAFNNL	8
TAVQGGSFI	9
SVVAYNNL	8
VGLTNYAAA	9
GAYARGTAL	9
TFQRSAGL	8
AAPSGHLGGL	10
SLMLLSSL	8
KIFTASNV	8
SGLKYVNV	8
KVNTFSAL	8
VLVTFSTL	8
SSLIFSIL	8
AIYLVTSL	8
VSLLFTTV	8
SSGTGLPDM	9
MMNKDEL	7
SAPSSSTPF	9
SVASFQEL	8
MVTNVTSL	8
SSPRFSSL	8
DIAHTPGVA	9
NFDFPKL	7
SFPGFVNL	8
FSIMGVNL	8
SVVSFDKV	8
KAVDFTTV	8
SALIYSNL	8
SATVFRTV	8
LSNHPSLL	8
RSTVFGTL	8
AVFARVAF	8
KISVYGTL	8
VSISFKSL	8
ATLAYTKL	8
LAVHLNTL	8
VLAVLPRL	8
VVLNFRDSGRSA	12
VNFEFPE	7
GGRGSYGDL	9
SGLQYNSL	8
SSGINGSFL	9
PQTREHL	7
SSPLYTTL	8
STLTFAEL	8
SNFKATTL	8
GVVMFISL	8
SILGFVVM	8
VHIVLPGM	8
KKSYVGSL	8
VSVIFGFL	8
VLYPVKY	7
RLYLFGL	7
VGVVNPILA	9
KRRVLPL	7
SSEVYANL	8
TVLSGGTTM	9
AGPTFNYL	8
SSYHLYL	7
GSYPFQAL	8
EGAKFIAM	8
SSPVFKAM	8
ATGPYRAF	8
STVDFSKV	8
AGFAFLTGV	9
SPKYIKM	7
SHVSLVQL	8
AITTLHNL	8
VGVASTVHL	9
ALLEPARL	8
IRIVLVGL	8
STMWDNN	7
TFQFNNL	7
SIGFPYSL	8
TYVPKEF	7
VNIDVPNL	8
TVFSFLGL	8
VTPPMPLL	8
TSPPVRNL	8
SAGPKLPTI	9
SILTLSHL	8
AALPKATVL	9
RGPENLLDHQM	11
AMCECQAL	8
SGQGAFGNM	9
MGVNLTSM	8
SAFQFGEV	8
GAYSATTTI	9
SSPVSHTAV	9
AAPSPGANSL	10
TGRSYTSL	8
SFFKQDL	7
TSVGFFNL	8
AAPINTQGL	9
NVTFKIY	7
TLLVADPR	8
LGVLNGAQL	9
VGAQNGILI	9
AVVVNAAQL	9
INAARGLGL	9
AIPELTKL	8
GALKNIVAV	9
SPVNVKKL	8
FSPLNPMRVHI	11
INQSLLTLGRVI	12
GAMSNGVYA	9
ADLSHIET	8
AGYDYLAL	8
FSDGYLAL	8
SAVVMSYL	8
IAMTYTGL	8
SMKYLML	7
SLPNAGDVI	9
ISPEGAQAL	9
SVVLMSHL	8
VALALGDNL	9
DVTKVNPL	8
NSPLVSRL	8
IGVIFTHV	8
ALLAFTHL	8
AAARGLTLL	9
VIFIPALL	8
SIQSFSAM	8
PELPSEGGT	9
SGLYFSNV	8
SFTSFQGL	8
STYSVAKM	8
SAYRFSGV	8
GSSPELPSL	9
NGVINGAEL	9
GGGINVQEI	9
VLYQHNL	7
PQPHLPPT	8
LAGKNGVEV	9
NGILNVSAV	9
SAPRLTEL	8
TYKYAKI	7
KALANVATV	9
ATVKNAGLI	9
VSRLVSLI	8
AFVPVIKL	8
KSLIHKLDQTM	11
PGYSYTSL	8
YPGQAPPSA	9
IFGGFISM	8
FDLMYAK	7
GPVGQLWM	8
STLSYFGL	8
TAAVFHEL	8
EFVGVSHL	8
SLISNGPSL	9
LPSGSVAGSL	10
TIINAENL	8
AAPKSAETL	9
SGPLSVQSL	9
LIQNADTL	8
TVRNADVI	8
SSIRQPSL	8
SAIMNPASKVIAL	13
SGLLFTHL	8
VALPNVQF	8
GVAMLNGLI	9
AGPSLKTTL	9
ISLPLPTF	8
ATIRVTNL	8
GALTGLTRV	9
KTLVLSNL	8
TGPGNQDSL	9
HALSFSNL	8
SGIAGFSHL	9
AIENIDTL	8
ATSLNQAAL	9
SGSLNAQVL	9
DNIQGITK	8
TAYRPPAL	8
IRDVVSSL	8
IIPTFANL	8
VAPRYVAL	8
VVPAYRAL	8
SIIKLTTL	8
KILVFVAV	8
SYTFPKM	7
ISFTFQM	7
SGVEGQDVV	9
TAIENATVA	9
VSPANSTTL	9
SGTVYIHL	8
VAPENEGRLVHI	12
YVPGIMPI	8
ISPLFAEL	8
AAVPGKTFV	9
VIAGFNRL	8
GNLRFLGL	8
AILKFQGL	8
ASATSLGHF	9
SGGDNKVTL	9
TPVISGGPY	9
QGPDYVLV	8
ANFQAARL	8
TNLVYPAL	8
SNIPFITV	8
LVQPFSSL	8
YAAAALPTL	9
VVAEFGRI	8
SAFRPSLL	8
SIYAPARL	8
SSPAFRIL	8
AEVVRFLG	8
RNAVFGKV	8
SVPLFKSL	8
SSFVLPKL	8
AGLLFRTL	8
LIAVFKSL	8
KIVTFLGL	8
GYMYTQL	7
GGLAAQEVM	9
FVNFDHL	7
TGLENSTAV	9
SSSLNAEAI	9
EMIDVIGV	8
STTVFHSL	8
ASFSNGPVL	9
AAPLSGQTF	9
IMNQEKL	7
AAIRSVMGA	9
SSGIGKTEL	9
SSVTGLTNI	9
DFLSSLPL	8
RISGLIYEETR	11
SMLDIALL	8
VQSTITSR	8
AQLLFSNV	8
AGVGAGLAYL	10
GAVFNGITL	9
GSIINGFAL	9
ANVVFTQL	8
QALVFSNL	8
VIYPMAVV	8
VNVRFTGV	8
GLRNGVYL	8
VNVPVIGGH	9
VTILFADL	8
TLVTYVPV	8
SVITMVLL	8
VLVTMVTI	8
LKNFKEL	7
VLIIFSSL	8
HLEINPDHPIVETLR	15
SAATNPNAM	9
NAGENSTSL	9
TNVDFPSL	8
AINQFTQA	8
SGPIGPDHL	9
AGPGNHVQL	9
VFTEVANL	8
ASPEFTKL	8
ALLNGEYL	8
SIYPTAQL	8
IISMLSNV	8
VIISFNSL	8
VNTIFTVV	8
IAVFDSKL	8
AAVVSVAYL	9
SALDFVKL	8
AVVSFKEL	8
TALKFAEL	8
SNLVYAII	8
NVSLLALY	8
IAVRFSTV	8
IAIRYSAV	8
TALAFRTL	8
TFIKLASI	8
TPVISGGPYEYR	12
SSDSFTHL	8
AAGVNSEMV	9
SLADFNNL	8
SASSNPFAL	9
SFKFDHL	7
FTALHYAA	8
VSTSNVSSL	9
SSPVYIDL	8
SKFDVKMLENL	11
GLGTGFGTAL	10
ATLKSMNL	8
SLAGKITGM	9
VVFGFPDL	8
IYRGAGGSL	9
VSFRSANL	8
SRAVFSNL	8
GIHTNPAAL	9
SATAFQRI	8
GYIYHKL	7
FPDFIVR	7
TGLLFTEL	8
TSIAFKNI	8
TAVKFSQL	8
LSVAYKNV	8
FKNLATSI	8
VVLVFGML	8
LSILYVSV	8
SLLIYVSV	8
TAYMKRVEDVL	11
NMGTNASAL	9
GPVNHEEL	8
ADEGISFR	8
SSPKFSEL	8
EAAEYAKL	8
SMVTGLASL	9
VMTSLQSI	8
TTGSYPRL	8
LYYVHSL	7
GVMIFVNV	8
SMYVPGKL	8
GGIQNVGHI	9
STLLYGQL	8
TSATFLRV	8
ATLRYASL	8
VSFPFGKI	8
SGLTYIKI	8
VINHIISV	8
TLVALHQL	8
VHVTVINL	8
ATLIHQVL	8
AVILLPRL	8
SSPGRHEAQEPF	12
EDLRLPEGDLGK	12
SSYDWSKGHEF	11
SGFGYDHL	8
SSPEFSEL	8
FMPGFAPL	8
YEELQIT	7
FSSANGITV	9
INTAYTNV	8
SSQSFVQL	8
ANLSYQSL	8
SNTLFTNV	8
AAPGSKDHL	9
ADDGRPFPQVIK	12
SSVLFETL	8
TVYKASNL	8
TNVTFSKV	8
VSPYFVAL	8
ATPLFFSL	8
GVVLFTML	8
VVVMFTAL	8
SVLNVNHI	8
AGLTHGINL	9
SLIIYSTV	8
NAPTLLGPL	9
TIFVFAVV	8
AHIKLSNL	8
VNVQIPLL	8
SIVTIIHL	8
LSLLHLSL	8
AVVPLVGKL	9
LSLFHHSNIEM	11
FQVKNPPHTYI	11
VGFGGLEAM	9
SVPVFNSM	8
TFFTPGNL	8
SAPTFINF	8
SMVNLAFV	8
TIVVFNGM	8
GAHVNAQTV	9
SSINLSYI	8
STYVLSNL	8
VAPTNPQAV	9
SSFLFPKA	8
VRVGHSEL	8
IYKFLNV	7
VAPDLGVLL	9
ASLEAAIADAEQR	13
SFSHYSGL	8
QGTNPHMI	8
NVQSYSSL	8
SPYSPAYL	8
GIAMVDYL	8
GQFQFTGI	8
SSPPILHM	8
AAPINPSDI	9
SNYSVKTV	8
VYIFQEV	7
ISGVNGTHI	9
TLSVVHEL	8
GGPDNLVLL	9
TSVEHIIV	8
SAPTPIQAL	9
TAPVNIAVI	9
IALAFHLL	8
SNLLLPKL	8
HAISNYYDNHL	11
SSMAYPNL	8
FLMMNKD	7
NGYSYPVV	8
VGYAFDQV	8
TSYLMGNL	8
SLVGFTQM	8
SFHTPPNV	8
RGYDFAAV	8
NYRFEGL	7
ASVPGHMAL	9
ATYIFNGL	8
FGAVGSTLF	9
HSPAFVQL	8
LAPHFNSL	8
VGVTGVVHM	9
TNITHVTL	8
AGLTHVTSL	9
SGISLATHL	9
NYLFTKL	7
VISKPQNL	8
IAPLFPAGL	9
AVNRLVNL	8
VVAQLKQL	8
IGIVKQAGL	9
SGPKHLNM	8
SLPYYTGV	8
AVYSFEAL	8
GSLANHTSI	9
ASVTGHTNI	9
GTYVFTIV	8
LGFSYSLL	8
AWLQVSPV	8
AAVKFHNL	8
VSPLNVTAV	9
VGVINLDGL	9
AAGINVEII	9
AVVRLDNL	8
PDVLIVVSRHLT	12
VWIKPSGL	8
AWLRAIGL	8
LIDPVPQIAALAK	13
KLIEVANL	8
ATALNILAL	9
VANVSLLAL	9
TIAPALVSK	9
LPLHLPLP	8
GERGEQGPA	9
SLSNHTEL	8
ASYNHPVL	8
KIADMGHL	8
IRIGHTGM	8
VALENANAV	9
VSSVSHTAL	9
ATVNNPTAI	9
IAVAYHNI	8
LQQVAVQL	8
VAPSSVVEL	9
NYLHRVV	7
LANVNIGSL	9
GSAITGPVAK	10
SGIKNPVSV	9
VAPPSFVAI	9
VNLVVPLM	8
RGGLNLTAV	9
AAVVYHKL	8
SLVNLEIL	8
VNELLSLL	8
GAVTNVKVI	9
VQSNVLKL	8
GLVPFLVGV	9
VLNIFPVV	8
SQLRVAKV	8
GGGGTGRADDGGGGGGF	17
SNYNFEK	7
RSSSFGNF	8
ATFSFESL	8
ADYAFTTL	8
EVYSFSGL	8
STFTFADL	8
SAISFTEF	8
SNHVFNAL	8
VSPTAGAEAV	10
SAPQSAVEL	9
LTYTFSGL	8
STFGYTLL	8
GGLNNTVNI	9
TAVANNQAL	9
QNPVYAPL	8
AFLSVDHL	8
IVDTFHGL	8
SMVSVIHI	8
VSVLVNCPA	9
NYVFVFL	7
AVYLFAFA	8
SLVNQEVL	8
TGVSNPITI	9
SGPVSLQTL	9
TGPVNVLTT	9
TSPARLSGL	9
SALRSSAPL	9
TIRNADVI	8
STLLFAHI	8
FVGSPPKGL	9
VAAGSLVATL	10
TVKNVDII	8
KSPAITATL	9
ILQNTTVI	8
LSDGVAVLK	9
AVPIFIEL	8
AAISLATRV	9
VALQFPKV	8
IIIETISL	8
VTITLKNL	8
AQPPGATNM	9
SSAAFRYT	8
VGNEFSHL	8
ANVFSDLH	8
VNDAFTHV	8
KGFGFVTM	8
SAVQNVADV	9
AGPENSSKI	9
EPPVYANL	8
ANINFPNL	8
AQLTYHGL	8
AAPISTTEL	9
SSGKNVTLP	9
SGLLNSQAL	9
AQLANTTAI	9
FLINGPEI	8
GIFELPNL	8
FDKPVSPL	8
TIRNAQSI	8
SAPRLMVL	8
GSLTNVKAL	9
SGIINTKAV	9
IYLPIANV	8
AWISSILL	8
VAPVLYQL	8
VAPRFSIL	8
AFVRLPSL	8
SMIRILGL	8
AIIKFPLT	8
VALVYPKI	8
VLLAFARL	8
HAPRNLRLTYL	11
SGYSQSQF	8
TGFSYESL	8
QYEYTTV	7
VQHELDEAEER	11
GAPSNPDVF	9
EGYVHADL	8
SAPNSPMAL	9
AAMAFTYL	8
FSYLMKD	7
GMYSGHGKLEFI	12
GAHTYELL	8
SSPPFQQL	8
ISPLAQQM	8
AVYIFYGA	8
VQWFPNL	7
STITNPSAI	9
DSIANATVL	9
ALENDKTI	8
SQSTGLPTL	9
SSVINVSTP	9
TVEGITGNL	9
VHHGVNQL	8
NAPEFVKV	8
TAVPFVNGV	9
NFSQVIPV	8
IGPRFSNL	8
IAGPYNRL	8
LGGMSRGLL	9
GSIINISSI	9
IVSVNGTTI	9
SIKNVTEL	8
SLGSNLVTL	9
VMLELVAL	8
AIRVFANI	8
SLLSKKLD	8
SLVVLPYL	8
GVLKFARL	8
GSYSYTQV	8
TVTNPEPM	8
SGYKYVGM	8
SAVGNDTQL	9
NAVSGQESL	9
SMEKPPSL	8
RSGENAASL	9
IEEELGSK	8
SVLSNSANL	9
FELLVKSMAQYVHNL	15
VNYEPLGL	8
AWIHAAHV	8
LLMNADVI	8
GAQGSPFLK	9
AALQNAVAF	9
ASGTLLETI	9
AAISNKITS	9
VVDVFQVV	8
VAPSFGTLL	9
SMILVNVL	8
TIVMLTNL	8
LSYLVGRP	8
SIYIPRGV	8
RVIVFDGV	8
LSYLPGVR	8
LSVVSTSVI	9
SSLSLITLA	9
SIIVFNLV	8
VNFLVSLL	8
SALRFLVV	8
VVARFLSL	8
VANMHNGM	8
AAFDFTSM	8
GFAGDDAPR	9
ASYNHSQV	8
SSPSSPGSSL	10
SAPESSQSI	9
SVTHFDSL	8
SSPHYTTL	8
VSYNATHL	8
IHNFDFL	7
ATVTNPTTT	9
SVYQPAQL	8
ATVSNGPFL	9
VNVEFQGL	8
STATYHLL	8
SAPVNFISA	9
MVTITQNV	8
ALSCVQTAL	9
ENRIFGGL	8
SAMRAVAAL	9
EPFLSLSL	8
ESPVYLVV	8
YDTLPVVV	8
SIIMLEAL	8
SVVELVML	8
KSYQVAPL	8
GAIFNGLTL	9
VALNFQTL	8
AVGANTIFL	9
VSNAFVRL	8
SSLLYPLI	8
VLLTFEAL	8
TNVKFLAI	8
VALKFSQI	8
EDMAALEK	8
SSYVHSNL	8
TSHTFNSL	8
GLYFFML	7
SSNINSATL	9
ETPVYANL	8
GMVALGETL	9
STFSHKTV	8
RSAAFNQL	8
ATLSNTTKA	9
SNVVFLEV	8
VVDVFSQL	8
SIIMVTNL	8
AILTMTQL	8
VHVVPDQL	8
PVIKISYS	8
KIVAFETV	8
KAVTFIDL	8
INLIYGTI	8
ATIILTKM	8
SVVSFRLV	8
SAVIFRTL	8
STRLFAVL	8
SALVFTRL	8
ASIIRYAI	8
TLIAFTKL	8
SSLFLKVL	8
SSLLFVKL	8
SKYYHGELSYL	11
SSFDHTTL	8
SQGVGAELM	9
TGAERGGLM	9
SGPGFWSGL	9
ISVAHMSF	8
AMFGQPGAL	9
AGYVTHLM	8
DGDGTITTK	9
SIDQFANL	8
GAFTGLDNL	9
IAVANATTM	9
VGPDNVHVA	9
SYRAQPSV	8
AAIDYQKV	8
YAPKGSSVV	9
KAPTFSASV	9
VNKSYPSL	8
SGIDFKQL	8
IKFDTGNL	8
VSYKNPSL	8
SAVFNGSIL	9
GTTRNFVL	8
QGYTVARI	8
MALFAGGKL	9
ASLKSTSTL	9
SFIEVISL	8
FSEIVLSI	8
SIVDFLTL	8
KNLVYGTI	8
TSVVFNKL	8
SADKFVKI	8
TVYKIGNL	8
VVLIFGML	8
ATLAYKKL	8
LANHLIKV	8
SPEGQDYL	8
SSYQHTSV	8
SGGVNLQSM	9
THTNVSHI	8
GATHNPQAL	9
SYKFNHL	7
VADKFSEL	8
INDSYLAL	8
AISNLDYI	8
SSLGFERL	8
LENHPSVL	8
NVIMFVGL	8
ILFRGVGM	8
VTVDFSKL	8
TIVTVYNV	8
SIIIFTNT	8
GALSLYTAL	9
ATQVYTIL	8
SSLLFTQI	8
FGILGSTTL	9
TILSFTNL	8
VAYVSSVAL	9
TALTYLNL	8
VGVTYRTL	8
ISSAYVRL	8
AVGNHVAKL	9
SFLKTLSL	8
ISTIFKSL	8
SLVHIINL	8
FIIQFLK	7
TAVRHVLL	8
QPSNYGPM	8
SSDLFNNL	8
GTLTKNEM	8
SMVDVVML	8
KYYHGEL	7
SYSFRHL	7
STQIYQAV	8
SGGSNIIYV	9
SSVQVYNL	8
VSAGIQTSF	9
FAPIYADL	8
SVSRFNSL	8
SRATAGAYI	9
SGVSNPHVI	9
SATRFSQI	8
VHIPLPSM	8
SLIEFSTI	8
VWINAHGL	8
VQYKATSL	8
VSQKFTSI	8
STNLFSKL	8
VVISNAGHL	9
VQAAHLGTL	9
AGFLFQKV	8
VITTYSLL	8
SSYVVKKV	8
VHLDLLSL	8
ISPVNPVAI	9
AIFVPIHL	8
VAVPLIGKL	9
VPLIGKLGI	9
VLNKIPIL	8
KVIAPLRL	8
SAPSSFDSL	9
NSYGAQASI	9
TEVSFTLN	8
STVEFTNL	8
SSLEFSQI	8
TSPEGGIHL	9
SSLKNFQS	8
TSVRFDSV	8
SFVTTAER	8
SIVRTTSM	8
AVPYFSNL	8
ATPIFSKM	8
EKAVMVSF	8
NGVSNGLHL	9
ESITFKSV	8
SSVLYSRV	8
AGVTLHEAL	9
SLFTSSRL	8
IVQFFSGL	8
VAYVFQAL	8
SIVLHGATL	9
FALVFKSV	8
SFVKGFLL	8
VSPIILRL	8
GTGSNIDTF	9
AMSTNSVSV	9
SGYSFTHI	8
VEATFGVDESNAK	13
SSLVNGSTF	9
ATMLFAEL	8
SILAFVDM	8
SNFNFALV	8
VGFQYQGI	8
TPVITGAPYEYR	12
AAYGFRNI	8
SRFGNAFL	8
SAPAPTPTAV	10
AAPPPTSTAV	10
SIIAFFDV	8
SMILFTSL	8
QAVINGPNV	9
VAFAYKNV	8
SIVPMVHL	8
GAPLNLVDL	9
SSVKYSKI	8
IGYLFISV	8
YIFTVRL	7
LGKSPLPSL	9
ARIILVNI	8
NSLERMGLERM	11
SSPPYSQM	8
IMPNGDHI	8
SALKEAMF	8
AVVNVTYM	8
VVTVFNSM	8
GANVNHTTV	9
KAEMSHIP	8
KTYETASL	8
SSIDYSKL	8
VSPTGTHTL	9
SNLELHSL	8
SVVVFQSF	8
GVFSFSRL	8
VGYRFVTA	8
SSIVFGRF	8
VHIGQVIM	8
KSFLFSAL	8
ATYVFLKA	8
IFVPVPQL	8
AAIVAKQVL	9
VGLQVVAVK	9
IALLLGTVI	9
GMGTGAGAYI	10
DVTTFLSM	8
NNYVYAGL	8
NVYNYAGL	8
ATFPFAML	8
MITMSAFL	8
ATFLYAEV	8
AVVTFYDV	8
ASFLYAEI	8
SIIYSMSI	8
AGLQNPNSL	9
SALGSQTHL	9
QAIHFANL	8
DVQLQESGPGLVK	13
AGLENPITV	9
APDLGQVTL	9
VISTFFTV	8
AYKFGKTV	8
IVDIFHGL	8
VMVQPINL	8
ATVPNTIVV	9
SAPINSVLL	9
VAVGPLGSTI	10
IVTGNPTVI	9
ITIPMIPL	8
IAPRSGLSL	9
TSPLLRNL	8
LVAIFTHL	8
IGLGNLTLI	9
GLIGNITLI	9
VSVLNVAVL	9
VNISLRVL	8
SLIILKQV	8
ISLLIGKGL	9
TVSNPSYM	8
SSAIYMNL	8
SSVKFAEM	8
LTQGYVSM	8
SSLHPMGGL	9
VGNNFHNL	8
RSYVTTST	8
SALDNGPQI	9
AGYSFEKL	8
SSYQFGII	8
SNTVFSFL	8
PKHQEYL	7
AIFKAFAM	8
ISPTAPDTL	9
SKGANPVEI	9
AALANLDNI	9
ATVPPYLGP	9
RGIDVQQV	8
GALKNGQNL	9
RQNSSPLL	8
SQPRGASVL	9
VINSFVHV	8
ATLVFHNL	8
GTLLQVFH	8
VVTHFIQA	8
IGPSSIDLI	9
TVLVNAQGL	9
VSAQNLVAI	9
GSVRNAVVL	9
RSVQVVNL	8
AAVINKTVV	9
QVSKLAGVL	9
GALKNLSVI	9
ASLVNKIGL	9
QTVAVGVIK	9
GGLLNITKV	9
SITSFMDV	8
ITGYFPSM	8
MGNHLTNL	8
GINNLTHM	8
AAYEFTTL	8
SASSNLSHL	9
APDNRETL	8
SNRSYVTTSTRT	12
SSPDHIFL	8
SVMELAHL	8
AGIINHGYA	9
SINGAFGHL	9
VGPKGEESI	9
SSYIFSLV	8
SQGVGQVQL	9
LQDAEIAR	8
LSPVYTHV	8
TLSWNVVP	8
AALVNLDSL	9
VNTILENL	8
TSPLGAEKI	9
SGPKDVTVL	9
NIILEEGK	8
AIGTGREVL	9
VSLLFHSI	8
GVYLHTLI	8
SIIKIENV	8
AQLSLIASL	9
ISLLNGVSL	9
STLVLNRL	8
VNIRTSLL	8
SSLLRLNL	8
TGMSYTQL	8
VNIMHSSL	8
GGNINVETI	9
STFSFTKV	8
VMEKPSPL	8
AAGINRDSL	9
GINEAGISR	9
LGNVVSDGR	9
TVVSFHQV	8
VAHLYSNL	8
VTVTFNHV	8
AAVLDIDTV	9
AALVDLDSL	9
VAPAAHTHI	9
LALVNSSNV	9
ASIVNKDGL	9
SVAVNISNL	9
VLPVFDNL	8
IITTLENL	8
SSLKNGVVL	9
SAISLKANI	9
IVPLFTNL	8
SLIPFVQL	8
GITIFRPL	8
TVISLLTGL	9
VSFLLPKL	8
SNYHFYS	7
ESLTYASM	8
SGLDYSYL	8
HNVSFSNL	8
KGFGFGTGF	9
ASYTYLSL	8
TYTYEKL	7
QSVVNSGNL	9
AAGTNKENL	9
VMQEVAQL	8
VGFIYGYV	8
FGYVYVGL	8
SGYQPPRL	8
FIHNNLKDVYI	11
STPVNVTSL	9
VLTNQETI	8
GSIANLTEL	9
IVYGQPQL	8
GALLNPFSV	9
DKLGFPQI	8
QMVNTVLI	8
VVMRVANL	8
TSLKLENL	8
SLAVNTSLI	9
TLGINVTSI	9
VFIDLPTL	8
GALVNAIFL	9
LDHIPLPL	8
GVLRFVNL	8
SSIGLKTVI	9
VIVKFAQL	8
SSPNNASEL	9
QDSLNQVN	8
GTYNYTSL	8
KSYNYML	7
SGIENVNSV	9
SSYAYTKV	8
KSFSYSSL	8
SAGINPFNV	9
VQYTHSAL	8
GPQNIYNL	8
AVMQGANVL	9
SIERMGPL	8
VLEDSDLK	8
RSAHFSTL	8
GNVTNITTV	9
SLKNSQEI	8
SAPTGSGKTL	10
TSPPFKEL	8
LNPEFISV	8
IMIEISNV	8
TTYVHKGL	8
VMVSPTRL	8
IGGFAGRIGA	10
ISYRLPGL	8
TVMVRSIL	8
SLVKYVPL	8
IALRYVAL	8
SGYDMPYA	8
GGPENVAEM	9
SSYDFTSI	8
SSAQGQQTL	9
ESPLFNNV	8
TITTFEHA	8
AVMEVQNL	8
SVFYFASV	8
AAYTFYAL	8
SAPRNFVE	8
ASFNLPSAL	9
ISPANIASF	9
FSLPNGTAL	9
KMIDVNAL	8
VGPRYTNL	8
VSPRGAGYL	9
ATRSFPQL	8
AVVEFQRA	8
ATRLMAQL	8
IGYAFVHL	8
VVPEYVTL	8
SLIMLVEV	8
AGLVNIVSF	9
ATQVYPKL	8
NNLLYVAL	8
ISPFFPLV	8
IITGFRNV	8
VNRSFIAL	8
VAIGNPVHL	9
SGFRLLNL	8
SVAAVFRGL	9
VGIEYILL	8
SNVVFKLL	8
VNIVHPKL	8
[truncated: 8,242 more rows]

## Sheet: VACV
			H-2-Db							H-2-Kb
Peptide	Length	Tm	core	icore	EL-score	EL_Rank	BA-score	BA_Rank	Db-BA (nM)	core	icore	EL-score	EL_Rank	BA-score	BA_Rank	Kb-BA (nM)	Ave	NB	H-2Db-binder	H-2Kb-Binder	MHC allele	Experimental BA - IC50	Mean of (% IFNγ of CD8+ response)
VHIYFVSL	8	42.7004	VHI-YFVSL	VHIYFVSL	0.0057	10.2067	0.0739	12.4693	22470.7	VHI-YFVSL	VHIYFVSL	0.8403	0.0377	0.7483	0.0409	15.24	0.423	1	NB	SB	H-2Kb	0.5	0.152688		Strong binder (SB)
INYVETKYF	9	39.5051	INYVETKYF	INYVETKYF	0.0162	5.1287	0.0875	9.3792	19399.5	INYVETKYF	INYVETKYF	0.54	0.1993	0.5889	0.2469	85.44	0.2781	1	NB	SB	H-2Kb	4.11762	0		Weak Binder (WB)
SSFVKKFGL	9	40.2912	SSFVKKFGL	SSFVKKFGL	0.144	0.7061	0.2042	1.5858	5490.35	SSFVKKFGL	SSFVKKFGL	0.6561	0.1118	0.663	0.1135	38.32	0.4	2	NB	SB	H-2Kb	4.89255	0		Non-binder (NB)
STLSVVHEL	9	48.8283	STLSVVHEL	STLSVVHEL	0.391	0.182	0.2504	0.9847	3327.64	STLSVVHEL	STLSVVHEL	0.4269	0.326	0.4048	1.2691	626.1	0.4089	2	SB	SB	H-2Db	1846.14	0		Binding Affinity (BA)
LSHFYPAV	8	44.3343	LSH-FYPAV	LSHFYPAV	0.0009	26.7436	0.0427	27.4805	31504.7	LSH-FYPAV	LSHFYPAV	0.4576	0.282	0.6299	0.1655	54.84	0.2292	1	NB	SB	H-2Kb	51512.2	0.05
TSYKFESV	8	53.1908	TSY-KFESV	TSYKFESV	0.0171	4.9302	0.0899	8.9046	18901	TSYK-FESV	TSYKFESV	0.9603	0.0061	0.8108	0.0145	7.75	0.4887	1	NB	SB	H-2Kb	1.1	5.28
ITYRFYLINL	10	64.1762	ITYRFLINL	ITYRFYLINL	0.002	18.3636	0.0861	9.6576	19701.6	ITYRFYLNL	ITYRFYLINL	0.5726	0.1676	0.8367	0.0107	5.85	0.2873	1	NB	SB	H-2Kb	0.5	2.93506
KNYLFNAI	8	49.5823	KNYLFNAI	KNYLFNAI	0.0057	10.1955	0.0813	10.6509	20754.5	KNY-LFNAI	KNYLFNAI	0.9091	0.017	0.8229	0.0127	6.8	0.4574	1	NB	SB	H-2Kb	1.92097	2.37006
DLFPSFVRL	9	47.8211	DLFPSFVRL	DLFPSFVRL	0.0132	5.8929	0.0598	17.4331	26192	DLFPSFVRL	DLFPSFVRL	0.62	0.1295	0.5303	0.4221	161.05	0.3166	1	NB	SB	H-2Kb	2.1265	1.69006
YAHINALEYI	10	54.5835	YAHINLEYI	YAHINALEYI	0.9131	0.0089	0.8435	0.0055	5.44	YAHINLEYI	YAHINALEYI	0.0028	18.4935	0.1783	10.3078	7259.93	0.458	1	SB	NB	H-2Db	0.5	1.4199
SDLFPSFVRL	10	50.1117	SLFPSFVRL	SDLFPSFVRL	0.0194	4.4847	0.0914	8.6314	18602.8	SLFPSFVRL	SDLFPSFVRL	0.3724	0.4153	0.5591	0.3247	118.01	0.1959	1	NB	SB	H-2Kb	0.5	1.39006
VISDLFPSFVRL	12	52.5564	VIFPSFVRL	VISDLFPSFVRL	0.0016	20.4241	0.0596	17.516	26243.4	VIFPSFVRL	VISDLFPSFVRL	0.2357	0.7866	0.5892	0.2464	85.22	0.1187	1	NB	NB	H-2Kb	0.719065	1.35256
AAFEFINSL	9	52.3712	AAFEFINSL	AAFEFINSL	0.5761	0.0713	0.3673	0.3005	939.56	AAFEFINSL	AAFEFINSL	0.962	0.0059	0.7998	0.0171	8.72	0.769	2	SB	SB	H-2Kb	0.61	1.34049
ITYRFYLI	8	48.4892	ITYRFYLI	ITYRFYLI	0.0048	11.2646	0.1062	6.5321	15846.5	ITYRFYLI	ITYRFYLI	0.9173	0.015	0.8814	0.0075	3.61	0.461	1	NB	SB	H-2Kb	6.2	1.30549
KSYNYMLL	8	52.3379	KSY-NYMLL	KSYNYMLL	0.1223	0.8519	0.2221	1.3022	4520.61	KSYN-YMLL	KSYNYMLL	0.9689	0.0048	0.8864	0.0072	3.42	0.5456	2	NB	SB	H-2Kb	2.7	1.17078
YSLPNAGDVI	10	51.7292	YSLPNGDVI	YSLPNAGDVI	0.9161	0.0086	0.7598	0.0084	13.45	YSLPNAGVI	YSLPNAGDVI	0.0011	28.6304	0.114	22.1619	14561.4	0.4586	1	SB	NB	H-2Db	8.4	1.11107
LNFRFENV	8	48.5529	LNF-RFENV	LNFRFENV	0.0013	22.7344	0.0569	18.7185	27013.1	LNF-RFENV	LNFRFENV	0.8751	0.0297	0.8159	0.0137	7.33	0.4382	1	NB	SB	H-2Kb	0.84	0.909489
SIFRFLNI	8	55.1061	SIFR-FLNI	SIFRFLNI	0.0054	10.4849	0.0978	7.6365	17353.5	SIF-RFLNI	SIFRFLNI	0.9751	0.0038	0.894	0.0067	3.15	0.4903	1	NB	SB	H-2Kb	1.2	0.882293
IGMFNLTFI	9	49.9245	IGMFNLTFI	IGMFNLTFI	0.85	0.0154	0.8164	0.0064	7.29	IGMFNLTFI	IGMFNLTFI	0.0512	3.3032	0.4197	1.1196	533.19	0.4506	1	SB	NB	H-2Db	0.34	0.83518
VIYIFTVRL	9	64.0973	VIYIFTVRL	VIYIFTVRL	0.022	4.0631	0.0902	8.8478	18838.6	VIYIFTVRL	VIYIFTVRL	0.9761	0.0037	0.8611	0.0088	4.5	0.4991	1	NB	SB	H-2Kb	0.85	0.605114
SQIVDDDFI	9	43.6859	SQIVDDDFI	SQIVDDDFI	0.6628	0.0474	0.6189	0.0304	61.74	SQIVDDDFI	SQIVDDDFI	0.0011	28.9457	0.0856	33.0825	19793.5	0.3319	1	SB	NB	H-2Db	1.36622	0.471312
VTKYYINL	8	44.7649	VTKYYINL	VTKYYINL	0.0007	30.1923	0.0253	48.3971	38012.5	VTKYYINL	VTKYYINL	0.9069	0.0175	0.7832	0.0253	10.44	0.4538	1	NB	SB	H-2Kb	3.5642	0.246312
SAPMNVDNLIM	11	50.0161	SAPMNVDIM	SAPMNVDNLIM	0.9487	0.0052	0.7728	0.008	11.69	SAPMNVDNM	SAPMNVDNLIM	0.0068	11.8179	0.1521	13.8633	9641.27	0.4777	1	SB	NB	H-2Db	3.95296	0.240063
YSPSNHHILL	10	46.4325	YSPSNHHIL	YSPSNHHILL	0.8935	0.0109	0.6385	0.0259	49.95	YSPSHHILL	YSPSNHHILL	0.0906	2.0948	0.3479	2.0714	1159.02	0.492	1	SB	NB	H-2Db	1.25786	0.217562
LSYIYNML	8	51.2732	LSYIYNML	LSYIYNML	0.0043	12.0646	0.0803	10.8685	20982.6	LSYIYNML	LSYIYNML	0.9568	0.0067	0.8792	0.0076	3.7	0.4806	1	NB	SB	H-2Kb	0.5	0.200063
SAPMNVDNLIMIV	13	45.8393	SAPMNVDIV	SAPMNVDNLIMIV	0.3761	0.1964	0.6287	0.0281	55.5	SAPMNVDNV	SAPMNVDNLIMIV	0.001	30.1795	0.1148	21.9277	8 14434.8	0.1885	1	SB	NB	H-2Db	7.17845	0.197563
FKLILAEYI	9	44.9761	FKLILAEYI	FKLILAEYI	0.2459	0.3678	0.4254	0.1882	501.25	FKLILAEYI	FKLILAEYI	0.0064	12.2261	0.1481	14.5312	10065.4	0.1261	1	SB	NB	H-2Db	3.85296	0.152563
TGPVGQLWM	9	39.2427	TGPVGQLWM	TGPVGQLWM	0.3573	0.2175	0.3402	0.3946	1260.48	TGPVGQLWM	TGPVGQLWM	0.0183	6.6215	0.151	14.0464	9761.67	0.1878	1	SB	NB	H-2Db	144.182	0.132563
YAPVSPIVI	9	52.1065	YAPVSPIVI	YAPVSPIVI	0.866	0.0137	0.5804	0.0407	93.72	YAPVSPIVI	YAPVSPIVI	0.0572	3.0379	0.1745	10.7624	7569.15	0.4616	1	SB	NB	H-2Db	1.4	0.528072
AIVNYANL	8	49.6735	AIVNYANL	AIVNYANL	0.0842	1.2434	0.26	0.8816	3002.33	AIVN-YANL	AIVNYANL	0.8884	0.0231	0.7808	0.0261	10.71	0.4863	2	NB	SB	H-2Kb	0.767888	0.460071
SAPMNVDNLI	10	52.2019	SAPMNVDLI	SAPMNVDNLI	0.9345	0.0067	0.806	0.0068	8.16	SAPMNVNLI	SAPMNVDNLI	0.0045	14.6446	0.167	11.7089	8207.91	0.4695	1	SB	NB	H-2Db	3.27357	0.209479
LNYVDYNI	8	52.3857	LNYVDYNI	LNYVDYNI	0.0012	23.7411	0.0529	20.7735	28200.9	LNYVDYNI	LNYVDYNI	0.179	1.0708	0.504	0.523	214.06	0.0901	1	NB	NB	H-2Kb	40633	0.187687
NQMVNTVLI	9	50.1505	NQMVNTVLI	NQMVNTVLI	0.8764	0.0127	0.7302	0.0095	18.54	NQMVNTVLI	NQMVNTVLI	0.0095	9.7244	0.165	11.9623	8383.47	0.443	1	SB	NB	H-2Db	0.5	0.184625
MMINPFMI	8	53.2033	MMINPFMI	MMINPFMI	0.0777	1.3537	0.3064	0.5522	1816.44	MMINPFMI	MMINPFMI	0.0445	3.65	0.3708	1.6779	905.3	0.0611	1	NB	NB	H-2Db	1096.5	0.158719
SAPMNVDNLIMI	12	47.6529	SAPMNVDNI	SAPMNVDNLIMI	0.6976	0.0412	0.7309	0.0094	18.39	SAPDNLIMI	SAPMNVDNLIMI	0.0027	18.9675	0.1437	15.3234	10559.8	0.3501	1	SB	NB	H-2Db	1.72883	0.235708
SAPMNVDNL	9	57.0005	SAPMNVDNL	SAPMNVDNL	0.9945	0.0006	0.8673	0.0047	4.2	SAPMNVDNL	SAPMNVDNL	0.2152	0.8714	0.3569	1.9127	1051.7	0.6049	2	SB	NB	H-2Db	2.6	0.234503
IMFSKSLNF	9	45.064	IMFSKSLNF	IMFSKSLNF	0.0609	1.7102	0.1814	2.1106	7026.39	IMFSKSLNF	IMFSKSLNF	0.6771	0.1026	0.7236	0.0603	19.89	0.369	2	NB	SB	H-2Kb	1.3231	0.108143
MALLFKNL	8	48.1988	MALLFKNL	MALLFKNL	0.0099	7.1562	0.1012	7.1641	16735.8	MALLFKNL	MALLFKNL	0.8534	0.0347	0.8028	0.0163	8.44	0.4317	1	NB	SB	H-2Kb	0.905993	0.0952857
FLMMNKDEL	9	48.2734	FLMMNKDEL	FLMMNKDEL	0.8783	0.0125	0.7337	0.0093	17.83	FLMMNKDEL	FLMMNKDEL	0.0104	9.278	0.1869	9.4086	6621.31	0.4443	1	SB	NB	H-2Db	6.6	0.390714
LMYIFAAL	8	52.652	LMY-IFAAL	LMYIFAAL	0.0028	15.5044	0.1044	6.7533	16162.6	LMY-IFAAL	LMYIFAAL	0.8028	0.0506	0.839	0.0104	5.71	0.4028	1	NB	SB	H-2Kb	0.86	0.376339
TMMINPFMI	9	48.0788	TMMINPFMI	TMMINPFMI	0.7694	0.0251	0.7386	0.0092	16.92	TMMINPFMI	TMMINPFMI	0.0373	4.1403	0.3448	2.1336	1198.66	0.4034	1	SB	NB	H-2Db	7.9	0.270953
GSPTNLEFI	9	51.1687	GSPTNLEFI	GSPTNLEFI	0.9575	0.0043	0.7664	0.0082	12.53	GSPTNLEFI	GSPTNLEFI	0.0113	8.845	0.1412	15.8028	10850.7	0.4844	1	SB	NB	H-2Db	0.5	0.216067
VSLDYINTM	9	52.6811	VSLDYINTM	VSLDYINTM	0.2526	0.3557	0.2417	1.0719	3658.86	VSLDYINTM	VSLDYINTM	0.8414	0.0375	0.701	0.0768	25.41	0.547	2	SB	SB	H-2Kb	0.94	0.198674
TIVDFLSRL	9	53.3784	TIVDFLSRL	TIVDFLSRL	0.0123	6.1955	0.0718	13.0697	23004.6	TIVDFLSRL	TIVDFLSRL	0.9208	0.014	0.7595	0.035	13.49	0.4666	1	NB	SB	H-2Kb	0.5	0.106597
VMVTITQNV	9	49.5149	VMVTITQNV	VMVTITQNV	0.0516	1.9987	0.1718	2.387	7789.39	VMVTITQNV	VMVTITQNV	0.3158	0.5342	0.4894	0.5991	250.67	0.1837	2	NB	NB	H-2Kb	0.5	0.1017
SQYEYTTV	8	48.0412	SQYEYTTV	SQYEYTTV	0.0376	2.6581	0.1262	4.6623	12766.9	SQYEYTTV	SQYEYTTV	0.8955	0.0204	0.7382	0.0501	16.99	0.4665	1	NB	SB	H-2Kb	0.5	0.101125
YGVSNFKIGM	10	50.8161	YGVSNFIGM	YGVSNFKIGM	0.3486	0.2277	0.4889	0.0997	252.14	YGVSFKIGM	YGVSNFKIGM	0.0163	7.0951	0.2797	3.7926	2423.6	0.1824	1	SB	NB	H-2Db	3.80216	0.0949306
LFKNLATSI	9	40.6872	LFKNLATSI	LFKNLATSI	0.0032	14.1459	0.0529	20.8117	28223.2	LFKNLATSI	LFKNLATSI	0.0139	7.8513	0.1742	10.7982	7594.08	0.0086	0	NB	NB	H-2Kb	1189.51	0.0947667
APGSPTNLEFI	11	39.7841	ASPTNLEFI	APGSPTNLEFI	0.8259	0.018	0.6508	0.0217	43.75	ASPTNLEFI	APGSPTNLEFI	0.002	21.8719	0.0979	27.6623	17331.4	0.414	1	SB	NB	H-2Db	14.0395	0.0946458
SAPFDSVFYL	10	50.9607	SAPFDSVYL	SAPFDSVFYL	0.6309	0.055	0.5367	0.0624	150.25	SAFDSVFYL	SAPFDSVFYL	0.0916	2.0718	0.3906	1.4224	730.52	0.3613	1	SB	NB	H-2Db	0.5	0.0859167
NAVSNKYEL	9	48.7408	NAVSNKYEL	NAVSNKYEL	0.9034	0.0099	0.6479	0.0229	45.11	NAVSNKYEL	NAVSNKYEL	0.0353	4.3024	0.1797	10.1522	7157.05	0.4693	1	SB	NB	H-2Db	0.79061	0.0657083
MITMSAFL	8	42.9525	MITMSAFL	MITMSAFL	0.0025	16.2473	0.1224	4.9514	13292	MITMSAFL	MITMSAFL	0.0244	5.5056	0.3557	1.9329	1066.01	0.0135	0	NB	NB	H-2Kb	186.261	0.156111
VNIDQTTPM	9	44.6701	VNIDQTTPM	VNIDQTTPM	0.1374	0.7489	0.2095	1.4927	5181.22	VNIDQTTPM	VNIDQTTPM	0.3581	0.4431	0.5004	0.5418	222.57	0.2477	2	NB	SB	H-2Kb	41.005	0.0961111
IMIEISNV	8	47.1426	IMIEI-SNV	IMIEISNV	0.0045	11.7047	0.0717	13.0965	23025.5	IMIE-ISNV	IMIEISNV	0.5086	0.2272	0.5824	0.2622	91.66	0.2566	1	NB	SB	H-2Kb	12.1212	0.0855
IAIVNYANL	9	50.1394	IAIVNYANL	IAIVNYANL	0.9451	0.0056	0.7856	0.0075	10.17	IAIVNYANL	IAIVNYANL	0.815	0.0459	0.7936	0.0188	9.33	0.8801	2	SB	SB	H-2Db	0.5	0.07325
SMYVIPDEL	9	50.5782	SMYVIPDEL	SMYVIPDEL	0.7474	0.0301	0.5467	0.0567	134.9	SMYVIPDEL	SMYVIPDEL	0.4315	0.3187	0.5129	0.4842	194.53	0.5894	2	SB	SB	H-2Db	6.32668	0.0670278
IIAVFDSKL	9	39.7579	IIAVFDSKL	IIAVFDSKL	0.0102	7.0025	0.0699	13.6647	23474.3	IIAVFDSKL	IIAVFDSKL	0.492	0.242	0.5749	0.28	99.42	0.2511	1	NB	SB	H-2Kb	6.80662	0.0651111
FMRTDMLQNM	10	53.5174	FMRTDLQNM	FMRTDMLQNM	0.0227	3.9552	0.1936	1.8097	6154.84	FMRDMLQNM	FMRTDMLQNM	0.0054	13.2896	0.2156	6.9693	4852.4	0.0141	0	NB	NB	H-2Db	1.50498	0.0625833
SQGTNPHMI	9	42.9599	SQGTNPHMI	SQGTNPHMI	0.8019	0.0208	0.5229	0.069	174.6	SQGTNPHMI	SQGTNPHMI	0.0096	9.6641	0.0909	30.593	18694.6	0.4058	1	SB	NB	H-2Db	62.9835	0.0573333
VTIRNVTHI	9	50.69	VTIRNVTHI	VTIRNVTHI	0.9572	0.0044	0.757	0.0085	13.87	VTIRNVTHI	VTIRNVTHI	0.2926	0.5945	0.4326	1.0003	463.86	0.6249	2	SB	NB	H-2Db	0.5	0.0536944
SQYYFSML	8	49.4368	SQYYFSML	SQYYFSML	0.0201	4.3583	0.128	4.5207	12517.3	SQYYFSML	SQYYFSML	0.9655	0.0053	0.8747	0.0079	3.88	0.4928	1	NB	SB	H-2Kb	0.5	0.0459167
KCIEYVTL	8	47.9077	KCIEYVTL	KCIEYVTL	0.0074	8.6852	0.0498	22.5691	29162.8	KCIEYVTL	KCIEYVTL	0.5235	0.2141	0.4616	0.7792	338.74	0.2654	1	NB	SB	H-2Kb	808.167	0.0754167
EQFTFSNV	8	46.4397	EQFTFSNV	EQFTFSNV	0.0026	16.1111	0.0462	24.8657	30331	EQFTFSNV	EQFTFSNV	0.4939	0.2403	0.5581	0.328	119.25	0.2482	1	NB	SB	H-2Kb	1.76453	0.071
YIDHIVNI	8	44.7165	YIDHIVNI	YIDHIVNI	0.0043	12.0152	0.05	22.4736	29112.1	YIDHIVNI	YIDHIVNI	0.046	3.5538	0.1914	8.9605	6300.24	0.0251	0	NB	NB	H-2Kb	17794.1	0.0706111
VNKYFENPL	9	44.9765	VNKYFENPL	VNKYFENPL	0.0102	7.0201	0.0713	13.215	23118.3	VNKYFENPL	VNKYFENPL	0.4793	0.2546	0.6349	0.1568	51.93	0.2447	1	NB	SB	H-2Kb	27.2573	0.06875
ITQYLDFL	8	48.905	ITQYLDFL	ITQYLDFL	0.0023	16.853	0.0542	20.1009	27811.2	ITQYLDFL	ITQYLDFL	0.0843	2.2301	0.3312	2.405	1388.25	0.0433	0	NB	NB	H-2Kb	1189.95	0.06725
KQYIVATL	8	44.3387	KQYI-VATL	KQYIVATL	0.0473	2.1834	0.114	5.7147	14559	KQYI-VATL	KQYIVATL	0.734	0.0785	0.6149	0.1905	64.53	0.3907	1	NB	SB	H-2Kb	0.5	0.06375
KTVTNLISETL	11	49.386	KTVTNSETL	KTVTNLISETL	0.734	0.0331	0.5321	0.0646	158.02	KTVTNLITL	KTVTNLISETL	0.0124	8.3766	0.1705	11.2593	7905.38	0.3732	1	SB	NB	H-2Db	2.13474	0.05875
DVTTFLSM	8	48.9884	DVTTFLSM	DVTTFLSM	0.0002	46.4615	0.0211	56.7362	39803.4	DVTTFLSM	DVTTFLSM	0.0707	2.5452	0.2122	7.2112	5033.79	0.0354	0	NB	NB	H-2Kb	2600.16	0.0461111
TNVVNISTI	9	45.0038	TNVVNISTI	TNVVNISTI	0.8297	0.0176	0.6584	0.0193	40.3	TNVVNISTI	TNVVNISTI	0.0874	2.1642	0.2933	3.3542	2092.15	0.4586	1	SB	NB	H-2Db	9.97566	0.038875
RSTINGEQI	9	48.0343	RSTINGEQI	RSTINGEQI	0.8141	0.0193	0.5947	0.0367	80.26	RSTINGEQI	RSTINGEQI	0.0062	12.4566	0.1157	21.6745	14291.5	0.4101	1	SB	NB	H-2Db	59.0385	0.035125
KSLVNLEIL	9	47.6909	KSLVNLEIL	KSLVNLEIL	0.9788	0.0022	0.8091	0.0067	7.89	KSLVNLEIL	KSLVNLEIL	0.0711	2.5284	0.2951	3.303	2052.91	0.525	1	SB	NB	H-2Db	9.01477	0.155667
SFIEVISL	8	46.1125	SFIE-VISL	SFIEVISL	0.0052	10.7821	0.0512	21.7477	28727.5	SFIE-VISL	SFIEVISL	0.5403	0.199	0.4999	0.5446	223.89	0.2728	1	NB	SB	H-2Kb	0.5	0.135667
VGINLVEKI	9	41.2687	VGINLVEKI	VGINLVEKI	0.2357	0.3862	0.2714	0.7848	2652.21	VGINLVEKI	VGINLVEKI	0.1173	1.6397	0.2485	5.0764	3398.74	0.1765	2	SB	NB	H-2Db	510.1	0.0745
VGPNNTRSI	9	44.4642	VGPNNTRSI	VGPNNTRSI	0.7676	0.0255	0.5164	0.0737	187.27	VGPNNTRSI	VGPNNTRSI	0.1609	1.1898	0.2686	4.1964	2734.24	0.4642	2	SB	NB	H-2Db	29.1093	0.0575
YAIDVTKVNPL	11	44.0514	YAITKVNPL	YAIDVTKVNPL	0.3586	0.2159	0.4467	0.1504	398.13	YAIDKVNPL	YAIDVTKVNPL	0.0182	6.6491	0.212	7.2247	5044.05	0.1884	1	SB	NB	H-2Db	72.8422	0.0575
FTLINEEML	9	44.3235	FTLINEEML	FTLINEEML	0.8911	0.0111	0.684	0.0143	30.55	FTLINEEML	FTLINEEML	0.0344	4.3718	0.2295	6.0837	4176.07	0.4627	1	SB	NB	H-2Db	7.49543	0.0475
KTVKNVDII	9	47.7742	KTVKNVDII	KTVKNVDII	0.8758	0.0127	0.6892	0.0136	28.88	KTVKNVDII	KTVKNVDII	0.0069	11.6585	0.1267	18.816	12699.2	0.4414	1	SB	NB	H-2Db	2.48096	0.04
SAVINNMQI	9	51.8395	SAVINNMQI	SAVINNMQI	0.9625	0.0038	0.7796	0.0077	10.86	SAVINNMQI	SAVINNMQI	0.0387	4.0242	0.2298	6.0651	4162	0.5006	1	SB	NB	H-2Db	0.5	0.04
TSSINLSYI	9	45.0245	TSSINLSYI	TSSINLSYI	0.8902	0.0112	0.736	0.0093	17.39	TSSINLSYI	TSSINLSYI	0.0272	5.1272	0.269	4.1806	2722.25	0.4587	1	SB	NB	H-2Db	0.863614	0.03025
LQNVMISIL	9	45.0048	LQNVMISIL	LQNVMISIL	0.0952	1.0981	0.2281	1.2229	4236.46	LQNVMISIL	LQNVMISIL	0.023	5.7379	0.2219	6.5358	4530.26	0.0591	1	NB	NB	H-2Db	268.757	0
GTVVNKEAI	9	52.9558	GTVVNKEAI	GTVVNKEAI	0.775	0.0243	0.5858	0.0391	88.41	GTVVNKEAI	GTVVNKEAI	0.002	21.8374	0.0849	33.4652	19954.1	0.3885	1	SB	NB	H-2Db	4.98822	0
KVIGFVSI	8	42.7695	KVIGFVSI	KVIGFVSI	0.0061	9.765	0.0612	16.8007	25787.4	KVIGFVSI	KVIGFVSI	0.7077	0.0919	0.5921	0.2395	82.55	0.3569	1	NB	SB	H-2Kb	18.4716	0
KAIDFSQM	8	44.7462	KAIDFSQM	KAIDFSQM	0.0511	2.0175	0.1124	5.873	14817.1	KAIDFSQM	KAIDFSQM	0.8267	0.0414	0.6527	0.127	42.86	0.4389	1	NB	SB	H-2Kb	11.3781	0
ASLKNFKEL	9	44.9919	ASLKNFKEL	ASLKNFKEL	0.9435	0.0058	0.6678	0.0173	36.38	ASLKNFKEL	ASLKNFKEL	0.5319	0.2066	0.52	0.4588	180.08	0.7377	2	SB	SB	H-2Db	6.72473	0
SSFTKMAEI	9	49.289	SSFTKMAEI	SSFTKMAEI	0.4464	0.1365	0.4134	0.2067	570.95	SSFTKMAEI	SSFTKMAEI	0.6869	0.0987	0.6832	0.0898	30.8	0.5667	2	SB	SB	H-2Kb	10.637	0
ISIKLTDSL	9	41.2557	ISIKLTDSL	ISIKLTDSL	0.6713	0.0459	0.4608	0.1287	341.79	ISIKLTDSL	ISIKLTDSL	0.3196	0.5242	0.4309	1.0151	472.13	0.4954	2	SB	NB	H-2Db	106.008	0
SMLSNLTNL	9	51.1309	SMLSNLTNL	SMLSNLTNL	0.9581	0.0043	0.7927	0.0073	9.42	SMLSNLTNL	SMLSNLTNL	0.4489	0.293	0.5976	0.2265	77.75	0.7035	2	SB	SB	H-2Db	0.624383	0
ALYYVHSL	8	40.4539	ALY-YVHSL	ALYYVHSL	0.0042	12.2186	0.0564	18.924	27148.5	ALY-YVHSL	ALYYVHSL	0.6926	0.0969	0.5841	0.2583	90	0.3484	1	NB	SB	H-2Kb	0.936879	0
VIYDFLVKT	9	43.5241	VIYDFLVKT	VIYDFLVKT	0.0013	22.4375	0.033	37.1942	34978.1	VIYDFLVKT	VIYDFLVKT	0.6972	0.0954	0.642	0.1449	48.13	0.3493	1	NB	SB	H-2Kb	2.31043	0
IAPRSGLSL	9	40.8277	IAPRSGLSL	IAPRSGLSL	0.6165	0.0591	0.3862	0.2586	765.59	IAPRSGLSL	IAPRSGLSL	0.3211	0.5203	0.3895	1.4346	738.92	0.4688	2	SB	NB	H-2Db	150.33	0
AAIRGNDVI	9	46.673	AAIRGNDVI	AAIRGNDVI	0.7549	0.0284	0.5798	0.0409	94.25	AAIRGNDVI	AAIRGNDVI	0.002	21.7044	0.0878	32.0653	19341.1	0.3785	1	SB	NB	H-2Db	10.7505	0
TQNVNAAHL	9	50.7845	TQNVNAAHL	TQNVNAAHL	0.8647	0.0139	0.616	0.0311	63.73	TQNVNAAHL	TQNVNAAHL	0.0556	3.1077	0.2557	4.7366	3144.6	0.4602	1	SB	NB	H-2Db	7.92805	0
ECKTHASSI	9	44.3776	ECKTHASSI	ECKTHASSI	0.0009	27.338	0.027	45.6346	37344.3	ECKTHASSI	ECKTHASSI	0.0038	15.9045	0.0753	38.8247	22128.6	0.0023	0	NB	NB	H-2Kb	295.516	0
QIETGTPFIL	10	41.1722	QIETGTPFL	QIETGTPFIL	0.0008	27.6901	0.0282	43.7384	36863.8	QETGTPFIL	QIETGTPFIL	0.0007	35.2391	0.0589	50.9384	26429.4	0.0008	0	NB	NB	H-2Db	12878.3	0
MSMKYLML	8	42.8486	MSM-KYLML	MSMKYLML	0.009	7.6327	0.1113	5.9834	15000	MSM-KYLML	MSMKYLML	0.8411	0.0375	0.8225	0.0128	6.82	0.4251	1	NB	SB	H-2Kb	0.798091	0.0854167
ISISDAENM	9	43.781	ISISDAENM	ISISDAENM	0.4613	0.1261	0.4077	0.2173	607.09	ISISDAENM	ISISDAENM	0.0781	2.3661	0.2899	3.4548	2171.47	0.2697	1	SB	NB	H-2Db	42.1984	0
GIGVQGLADAF	11	43.5361	GVQGLADAF	GIGVQGLADAF	0.0007	30.3269	0.0457	25.1855	30480.4	GVQGLADAF	GIGVQGLADAF	0.0004	43.75	0.0668	44.683	24279.2	0.0005	0	NB	NB	H-2Db	110.021	0

## Sheet: SWATH_Tm_reps
Sequence	Tm_down	Tm_med	Tm_up	Tm_optimal
TSYKFESV	48.2789	51.7868	53.1908	53.1908
ITYRFYLINL	49.1429	64.1384	64.1762	64.1762
KNYLFNAI	47.4007	49.5823	50.0578	49.5823
DLFPSFVRL	48.6178	47.8211	47.8882	47.8211
YAHINALEYI	48.9353	52.3746	54.5835	54.5835
SDLFPSFVRL	48.9021	48.2767	50.1117	50.1117
VISDLFPSFVRL	48.9448	51.6085	52.5564	52.5564
AAFEFINSL	52.7741	52.4099	52.3712	52.3712
ITYRFYLI	48.6206	47.4051	48.4892	48.4892
KSYNYMLL	52.3379	43.265	47.4512	52.3379
YSLPNAGDVI	51.7292	51.27	51.3144	51.7292
LNFRFENV	46.4316	47.9964	48.5529	48.5529
SIFRFLNI	48.6566	48.8357	55.1061	55.1061
IGMFNLTFI	51.5039	49.9245	50.4057	49.9245
VIYIFTVRL	64.1411	64.2464	64.0973	64.0973
SQIVDDDFI	44.7282	44.1011	43.6859	43.6859
VTKYYINL	44.7649	45.5324	46.0024	44.7649
SAPMNVDNLIM	50.0161	50.4184	50.336	50.0161
YSPSNHHILL	46.3104	45.9947	46.4325	46.4325
LSYIYNML	51.6455	51.2732	50.2081	51.2732
SAPMNVDNLIMIV	47.3107	45.8162	45.8393	45.8393
FKLILAEYI	47.6699	45.7292	44.9761	44.9761
TGPVGQLWM	45.068	44.0591	39.2427	39.2427
YAPVSPIVI	52.1065	51.9375	52.2555	52.1065
AIVNYANL	49.6735	49.0919	48.3452	49.6735
SAPMNVDNLI	52.2019	51.8515	52.1286	52.2019
LNYVDYNI	55.9816	52.9449	52.3857	52.3857
NQMVNTVLI	50.2228	50.1505	50.1847	50.1505
MMINPFMI	47.0821	48.068	53.2033	53.2033
SAPMNVDNLIMI	47.9124	47.6848	47.6529	47.6529
SAPMNVDNL	55.5253	55.8084	57.0005	57.0005
IMFSKSLNF	44.6965	45.064	45.2464	45.064
MALLFKNL	46.9026	48.1988	48.0365	48.1988
FLMMNKDEL	46.5845	48.2176	48.2734	48.2734
LMYIFAAL	52.9126	52.8395	52.652	52.652
TMMINPFMI	49.4608	48.2685	48.0788	48.0788
GSPTNLEFI	51.6989	51.1687	51.6412	51.1687
VSLDYINTM	52.7927	52.6811	53.073	52.6811
TIVDFLSRL	48.8356	51.3829	53.3784	53.3784
VMVTITQNV	49.5149	49.5685	50.0108	49.5149
SQYEYTTV	36.675	48.3863	48.0412	48.0412
YGVSNFKIGM	48.8781	50.9177	50.8161	50.8161
LFKNLATSI	40.1712	40.6872	40.7931	40.6872
APGSPTNLEFI	39.6007	39.7903	39.7841	39.7841
SAPFDSVFYL	50.9607	49.7812	49.6015	50.9607
NAVSNKYEL	48.7408	52.0837	53.4546	48.7408
MITMSAFL	42.9809	42.9675	42.9525	42.9525
VNIDQTTPM	43.7525	44.6701	44.1029	44.6701
IMIEISNV	47.1426	47.6766	46.5884	47.1426
IAIVNYANL	50.1394	50.2127	49.7994	50.1394
SMYVIPDEL	50.6956	50.7056	50.5782	50.5782
IIAVFDSKL	39.7579	40.4863	40.7552	39.7579
FMRTDMLQNM	53.2887	53.5174	53.6005	53.5174
SQGTNPHMI	44.779	43.911	42.9599	42.9599
VTIRNVTHI	50.69	49.702	50.4276	50.69
SQYYFSML	49.4452	49.4368	48.2632	49.4368
KCIEYVTL	45.8927	46.236	47.9077	47.9077
EQFTFSNV	46.4397	46.2266	45.4779	46.4397
YIDHIVNI	44.7165	40.2821	45.8185	44.7165
VNKYFENPL	44.9765	46.8884	47.4142	44.9765
ITQYLDFL	49.3247	48.905	46.3647	48.905
KQYIVATL	44.3387	44.7978	44.9551	44.3387
KTVTNLISETL	45.6742	48.4567	49.386	49.386
DVTTFLSM	48.9884	45.7485	44.8879	48.9884
TNVVNISTI	46.3338	45.4381	45.0038	45.0038
RSTINGEQI	54.1338	53.5357	48.0343	48.0343
KSLVNLEIL	46.3258	46.9303	47.6909	47.6909
SFIEVISL	47.1941	46.1125	45.2151	46.1125
VGINLVEKI	41.2687	40.916	40.744	41.2687
VGPNNTRSI	45.6914	44.4642	44.5924	44.4642
YAIDVTKVNPL	44.0514	43.5315	43.8462	44.0514
FTLINEEML	45.2499	44.7876	44.3235	44.3235
KTVKNVDII	46.4464	47.1045	47.7742	47.7742
SAVINNMQI	51.8395	51.3315	52.1157	51.8395
TSSINLSYI	45.0245	45.5145	45.3204	45.0245
LQNVMISIL	45.0048	44.8899	44.0782	45.0048
GTVVNKEAI	49.3263	52.9558	53.196	52.9558
KVIGFVSI	42.65	42.7695	42.827	42.7695
KAIDFSQM	44.7462	45.6903	45.5505	44.7462
ASLKNFKEL	44.9919	44.3893	44.4799	44.9919
SSFTKMAEI	58.5959	49.289	40.5008	49.289
ISIKLTDSL	41.0651	41.1951	41.2557	41.2557
SMLSNLTNL	51.1802	51.1309	50.7277	51.1309
ALYYVHSL	39.078	40.1451	40.4539	40.4539
VIYDFLVKT	43.3484	43.5241	43.6659	43.5241
STLSVVHEL	62.7332	64.111	64.1041	64.1041
IAPRSGLSL	40.8277	40.8277	40.9049	40.8277
AAIRGNDVI	46.673	46.8114	46.6574	46.673
TQNVNAAHL	48.8576	50.7845	52.8571	50.7845
ECKTHASSI	44.3776	25.7932	61.3978	44.3776
QIETGTPFIL	41.2295	41.1888	41.1722	41.1722
AMADTFLEHM	41.6746	42.2818	42.623	42.2818
KQLPLVKPYL	40.9824	40.9535	40.948	40.9824
VAVIFSGL	45.9854	45.6203	45.1163	45.1163
VGIGFSNL	45.1792	45.012	45.0647	45.1792
RVMEYINRL	46.6766	46.3772	43.2551	46.6766
EFIRNQEQM	42.9671	42.9675	42.9678	42.9671
TFIIDPAAVIR	64.1618	64.0551	64.1523	64.1523
FTCGGILT	47.0234	47.0894	47.4444	47.0894
VSVLVALL	43.0252	42.4503	42.9203	42.4503
LAGVENSK	58.2761	57.5838	58.4963	58.4963
AGSSEPVTGLDAK	63.5967	63.4479	61.9154	63.4479
ASYLLAAL	50.4594	50.5459	49.7628	50.4594
IDPGGVIR	61.3251	61.8137	61.8618	61.8137
RNYEYLIRL	45.422	45.1837	45.0597	45.1837
VAPGYPLL	52.8509	53.1497	53.2196	52.8509
GLVMAPLL	52.9207	52.6632	52.7716	52.9207
AVVELVTV	41.0034	40.9272	40.8922	41.0034
LGLDLVTV	41.0034	40.9272	40.8922	41.0034
AVPIFVAL	47.1373	50.3475	50.9253	50.3475
YAHENDITHF	50.9325	52.6283	51.8288	51.8288
SVVPFIAV	40.9778	40.8823	40.8283	40.8283
VAAVFRGL	46.8818	50.2884	49.9413	50.2884
PGLYLSAL	61.2728	61.027	60.9085	61.027
VALLFTGI	48.4316	51.0023	51.6644	48.4316
GIILFSAI	48.4316	51.0023	51.6644	48.4316
RSLGNDVKSYL	43.2303	40.2166	46.6258	43.2303
ADVTPADF	64.3154	64.1607	64.2405	64.2405
SGLKYVAV	50.5441	50.184	49.3787	50.5441
AALIYTSV	48.6227	48.6928	48.988	48.6227
VGISYISV	31.7858	27.1821	40.7736	40.7736
ASVTFSLL	40.4596	44.0761	45.5421	45.5421
ASLYSLAL	50.3891	50.495	49.9121	49.9121
SAPANGILV	51.1414	51.3483	50.8632	51.3483
GGVRNGVAL	47.3602	48.0691	48.6316	48.0691
SAMVFSAM	53.066	52.939	53.0201	53.066
LGGNLNRT	49.9282	50.1818	50.4531	49.9282
VSFDFHGRRM	44.8857	44.9188	44.9428	44.8857
GSVVNSVAL	50.1459	50.7543	50.3297	50.1459
YAPVSPIV	42.9635	42.9675	42.9641	42.9635
AVLNFTAL	44.8029	45.0361	45.1191	44.8029
SAARFALL	45.8676	45.9038	45.8869	45.9038
VAYEAPSL	46.8213	45.0283	45.2371	46.8213
AIVEFATV	28.7508	32.1847	64.1089	64.1089
SAVVYAQL	44.9453	47.2102	47.5993	47.5993
IGTIYGNL	41.2168	41.1104	41.0251	41.0251
VTVVFSTV	47.4802	47.4118	47.5611	47.4802
FSPLNPVRVHI	45.8691	45.8689	45.8687	45.8691
AVYAFLGL	53.785	53.6259	53.5779	53.5779
AELVLVNP	46.1268	46.3882	46.5311	46.5311
SSPYFAAL	45.8586	48.2246	48.0911	48.2246
GLDAASYYAPVR	67.6772	67.8942	67.6314	67.6314
VIAELVNV	48.3487	47.2663	46.8859	46.8859
IMGVVPLL	53.4118	53.1713	54.081	53.1713
IMIALPSL	47.8929	45.9816	43.9136	47.8929
PKFEVIDKPQS	40.8779	41.0732	41.2142	40.8779
SAFFFGAL	48.2406	48.9281	48.9972	48.9281
LGGQTNLR	55.1811	61.9017	61.8209	61.8209
INEAGISR	61.9044	61.8489	63.8897	61.8489
SALTVQQL	61.0676	61.2496	61.2532	61.2532
SIIKATNL	42.9655	42.9675	42.9687	42.9655
SAIKGLSAL	40.5339	40.1676	27.6387	40.5339
ASLVFPLL	51.1045	50.7156	49.7628	49.7628
AQYGNILKHVM	40.9911	40.9267	40.8704	40.9911
GGNEQVTR	40.7972	58.6965	63.9464	40.7972
SGPDLSTAL	45.7678	44.5538	44.6251	45.7678
AVPEFQGL	43.8328	43.2763	42.7912	43.8328
CYGVDGESDSIM	50.4295	50.3785	50.2551	50.2551
VNFSPANL	48.1798	46.6627	42.542	46.6627
TVVNSQTL	48.2287	47.9514	45.4182	45.4182
SLVELTSL	44.4867	44.4776	44.0549	44.4867
IVVAFAEL	44.654	44.9582	45.0481	44.654
SNLVFLGL	47.9542	48.6912	48.9908	48.9908
VNLLFSGL	42.961	42.9675	42.9628	42.961
SGPEFTLL	49.213	49.0294	48.9341	48.9341
VIATFSLL	44.7467	44.8129	44.866	44.866
GILTFSNL	51.622	51.2982	51.1944	51.1944
FGGAMTDATALNI	53.7362	52.7264	53.9465	52.7264
SIANFTNV	49.0968	48.849	48.7827	49.0968
SNPEFSSV	48.039	48.0664	48.0063	48.0063
SFSLNDAL	49.2603	48.9787	48.9663	49.2603
TTVAFTQV	41.6507	41.6726	42.2513	42.2513
AIHNFPAV	42.9649	42.9675	42.9684	42.9649
DITLTSANHAMI	44.8569	49.5744	49.4278	49.5744
SIYEASSL	46.3143	51.1645	52.9529	51.1645
GAIGNPEVL	45.696	44.6323	45.2045	45.2045
AFYSIVGL	42.9646	42.9675	42.9647	42.9646
SSFFVNGL	50.2796	49.4536	49.0063	49.0063
KGFTFSAL	45.7683	46.0309	46.2824	45.7683
SGYKFGVL	46.5046	47.8952	48.0142	48.0142
GAIVNGKVL	45.7674	45.2026	44.6675	45.7674
ASPTNPTAI	62.5452	62.0639	62.2541	62.0639
ASPIFTHV	51.5738	51.0317	51.2413	51.2413
LGGNVQRE	56.6332	56.6793	56.6645	56.6793
TGVVNAQAL	52.9664	52.9742	53.0097	53.0097
SGFEFTSV	41.0157	40.9728	40.9446	41.0157
SSFVFSTV	52.4828	52.8131	53.084	53.084
SALPFVKL	42.9657	42.9675	42.9572	42.9657
MFTDQAQQDVI	49.8815	50.5257	51.3683	50.5257
KGLDFALL	30.7497	54.2436	1.63098	54.2436
VIAYLANI	64.4097	64.5146	64.5163	64.4097
SVLQFLGL	50.1535	51.0799	51.4536	51.4536
IALYIGNL	52.2878	52.5347	52.936	52.5347
GKLFNAII	64.0637	64.1992	64.1626	64.1626
SRILFGAL	42.9605	42.9675	42.9616	42.9605
SVFIAQNV	48.3515	47.8042	46.9016	48.3515
AALDFKNV	44.8305	44.4596	44.7371	44.7371
ALFKGDNL	48.3458	47.7028	46.9668	48.3458
SQAVFARV	40.6843	40.772	40.7558	40.772
TIVIMTSL	44.6914	44.9553	44.9988	44.6914
SFVELGQV	48.9904	49.0902	50.1917	49.0902
DLGIYANI	53.1463	53.3749	53.0281	53.3749
GVLEYANL	53.0926	53.0238	52.9982	53.0238
TAISFNLL	47.5134	47.2451	47.0153	47.0153
SGPTYIKL	51.4359	50.6698	50.4704	51.4359
SGLKYVNV	47.9124	51.6355	52.9316	52.9316
SALIYSNL	53.3189	53.6778	54.2312	54.2312
AVFARVAF	49.0376	49.0321	49.0106	49.0321
SGLQYNSL	42.9626	42.9675	42.9489	42.9489
SSGINGSFL	41.2409	41.2289	41.0491	41.0491
SSPLYTTL	47.463	47.2759	48.7138	48.7138
VGVVNPILA	45.0314	43.1431	43.4499	43.4499
AGPTFNYL	49.5385	48.8843	47.5984	49.5385
AGFAFLTGV	47.1931	47.4842	47.3727	47.3727
IRIVLVGL	45.7403	45.7156	45.491	45.7403
TVFSFLGL	48.574	49.1006	49.1236	49.1006
SAGPKLPTI	42.9612	42.9675	42.9632	42.9612
RGPENLLDHQM	45.7242	46.9747	46.2794	46.2794
AAPINTQGL	46.273	43.9141	42.3515	46.273
GALKNIVAV	44.4351	45.0042	42.9399	44.4351
AGYDYLAL	42.9637	42.9675	42.9671	42.9637
SVVLMSHL	43.6032	43.8828	44.1244	43.6032
LPSGSVAGSL	42.9657	42.9675	42.9686	42.9657
SAIMNPASKVIAL	44.7102	47.7117	47.7157	47.7157
ATIRVTNL	41.5028	41.6887	41.9909	41.9909
HALSFSNL	44.994	44.9832	45.0343	44.9832
SGSLNAQVL	41.1963	40.9279	40.766	40.766
VAPRYVAL	27.0239	40.5421	40.6991	40.6991
SIIKLTTL	42.8894	43.1263	43.2929	43.2929
YVPGIMPI	37.9145	39.5267	41.5431	41.5431
ISPLFAEL	52.5121	51.9881	51.8359	51.8359
VIAGFNRL	45.4994	44.0158	44.3547	45.4994
SGGDNKVTL	44.9996	45.0191	44.1486	44.9996
TPVISGGPY	65.5823	66.5498	66.7088	66.7088
TNLVYPAL	52.1922	64.0329	64.2217	52.1922
YAAAALPTL	47.1151	44.8814	43.3606	47.1151
SIYAPARL	44.579	44.2514	44.5888	44.5888
AEVVRFLG	41.6331	40.0816	41.1362	41.1362
LIAVFKSL	49.3773	49.3095	49.1395	49.1395
AAIRSVMGA	42.9666	42.9675	42.9681	42.9666
SMLDIALL	42.96	42.9675	42.9602	42.96
GAVFNGITL	40.7134	40.8346	40.9044	40.8346
GSIINGFAL	41.2919	41.2466	41.2352	41.2352
ANVVFTQL	48.8688	47.42	46.8862	48.8688
VIYPMAVV	47.0076	47.6816	46.1336	47.6816
VNVRFTGV	46.7391	50.5146	51.8142	51.8142
VNVPVIGGH	44.8013	44.5236	44.3907	44.8013
VTILFADL	45.078	45.1389	45.0871	45.0871
TNVDFPSL	44.9448	45.0222	45.0097	45.0097
AGPGNHVQL	42.9664	42.9675	42.9683	42.9664
VFTEVANL	51.5581	51.619	51.1115	51.5581
ASPEFTKL	47.1537	50.4497	50.9954	47.1537
ALLNGEYL	44.6616	43.9012	44.1261	44.6616
IISMLSNV	47.3145	47.4014	45.9061	47.4014
VIISFNSL	51.9625	52.5629	52.3918	52.3918
AVVSFKEL	42.9673	42.9675	42.9676	42.9673
SNLVYAII	45.794	45.7377	45.668	45.668
NVSLLALY	48.9881	48.9709	48.9524	48.9881
TALAFRTL	45.6841	47.2353	48.6883	48.6883
SSPVYIDL	50.6876	51.5556	50.4937	50.4937
SRAVFSNL	42.485	44.6324	45.3107	42.485
TAVKFSQL	40.9204	40.8343	40.9371	40.9371
FKNLATSI	41.0936	40.8861	40.8772	40.8772
LSILYVSV	41.3779	41.3158	42.5338	42.5338
SLLIYVSV	41.3779	41.3158	42.5338	42.5338
GPVNHEEL	51.8384	50.6609	49.835	51.8384
ADEGISFR	41.9697	2.13656	64.1493	41.9697
SSPKFSEL	49.872	51.9053	51.9069	51.9069
VMTSLQSI	46.9661	46.7551	45.701	46.9661
SMYVPGKL	41.9235	42.1767	43.0794	42.1767
GGIQNVGHI	47.552	51.3752	51.9	47.552
STLLYGQL	42.1171	44.3926	44.1295	42.1171
SGLTYIKI	43.2831	45.8434	41.5773	45.8434
SSPEFSEL	42.966	42.9675	42.9685	42.966
SSVLFETL	40.9794	41.0408	41.0664	40.9794
SVLNVNHI	64.1695	63.986	64.2947	64.2947
TFFTPGNL	40.6218	24.9163	40.5598	40.6218
SAPTFINF	47.3613	46.4476	45.6578	47.3613
TIVVFNGM	45.1625	44.451	43.8831	45.1625
VAPDLGVLL	42.9082	44.9907	45.1767	45.1767
SPYSPAYL	53.1865	53.0778	53.0912	53.0912
ISGVNGTHI	47.0404	48.4578	48.8565	47.0404
TLSVVHEL	45.0386	45.0092	44.9906	45.0386
TAPVNIAVI	52.127	53.3804	54.248	52.127
TSYLMGNL	43.1592	42.7824	64.8642	64.8642
ATYIFNGL	44.5243	44.629	44.8261	44.5243
IAPLFPAGL	48.1327	45.799	45.4076	45.4076
AVYSFEAL	53.643	53.396	53.5004	53.5004
AWLQVSPV	47.7608	45.5754	44.5654	45.5754
VSPLNVTAV	50.8532	50.5647	51.9079	50.5647
AAGINVEII	49.6381	49.8458	49.813	49.6381
PDVLIVVSRHLT	56.2128	56.1234	56.2766	56.2128
LIDPVPQIAALAK	21.309	38.4012	64.1107	64.1107
VALENANAV	42.9592	42.9675	42.9538	42.9538
LQQVAVQL	45.005	45.1151	44.9836	45.005
VAPSSVVEL	44.7554	44.846	45.129	44.7554
VNELLSLL	42.7786	43.2236	42.9676	42.7786
GAVTNVKVI	46.2931	45.9923	46.6545	46.6545
ATFSFESL	64.1077	62.414	39.953	64.1077
STFTFADL	50.3597	50.3821	49.5944	50.3821
SNHVFNAL	41.0232	41.0423	41.0622	41.0232
VSVLVNCPA	40.7448	40.8482	40.886	40.886
AVPIFIEL	44.052	42.853	42.1711	44.052
SAVQNVADV	47.8481	45.4562	45.1675	45.1675
EPPVYANL	44.811	42.8538	42.535	44.811
ANINFPNL	49.0232	47.3653	46.2836	49.0232
AQLTYHGL	41.74	41.6203	17.1631	41.74
SGLLNSQAL	49.3107	50.4916	51.2864	49.3107
AFVRLPSL	42.9673	42.9675	42.9676	42.9673
GAPSNPDVF	48.2413	48.0548	45.8765	48.0548
AVYIFYGA	45.4503	48.0971	46.8675	45.4503
NAPEFVKV	34.1198	45.8803	20.2707	45.8803
SLGSNLVTL	42.7439	48.2873	48.2558	48.2558
SGYKYVGM	45.2264	44.9952	45.0126	44.9952
VNYEPLGL	45.9492	45.4205	45.3052	45.9492
GAQGSPFLK	41.3114	40.7693	40.3189	40.7693
AALQNAVAF	51.4719	51.1648	52.2887	51.4719
VAPSFGTLL	48.7678	48.1347	48.1703	48.7678
TIVMLTNL	48.2844	45.0865	45.0485	45.0485
SIIVFNLV	52.4618	51.675	50.7228	52.4618
VNFLVSLL	48.1509	47.3007	46.7067	47.3007
SAPVNFISA	41.8559	41.7415	41.6969	41.6969
MVTITQNV	49.1668	49.2903	49.4402	49.4402
SVVELVML	45.4125	45.3185	45.1771	45.1771
SSLLYPLI	43.0839	42.7592	42.5458	42.5458
ETPVYANL	41.8401	45.9502	44.7143	44.7143
RSAAFNQL	42.9666	42.9675	42.9682	42.9666
SNVVFLEV	44.519	44.5625	44.8172	44.8172
SIIMVTNL	16.9803	38.4309	36.7766	38.4309
SVVSFRLV	42.9638	42.9675	42.9671	42.9638
SAVIFRTL	48.6877	51.122	51.0383	51.122
SALVFTRL	51.8188	52.5004	52.6705	52.5004
ASIIRYAI	48.6502	46.4332	47.5931	48.6502
SSLFLKVL	45.2845	45.1421	45.1549	45.1549
SSLLFVKL	48.9451	49.0552	49.0881	49.0881
SIDQFANL	41.767	6.42454e-06	9.0274	41.767
SGIDFKQL	42.682	42.9223	43.5606	43.5606
FSEIVLSI	47.1941	46.1125	45.2151	46.1125
SIVDFLTL	48.8847	49.0806	49.1021	49.0806
KNLVYGTI	42.9663	42.9675	42.9683	42.9663
INDSYLAL	45.0467	44.9049	44.0831	45.0467
AISNLDYI	45.9749	46.2272	45.1448	46.2272
SSLGFERL	40.9581	40.8453	40.826	40.826
VTVDFSKL	45.8927	45.8731	43.6263	45.8927
TIVTVYNV	40.6021	40.8383	40.9214	40.6021
SIIIFTNT	45.383	45.8229	45.0882	45.0882
ATQVYTIL	51.7978	50.9756	52.9316	50.9756
TILSFTNL	53.3956	53.5513	53.2872	53.5513
TALTYLNL	49.0061	49.0032	48.4427	49.0032
AVGNHVAKL	56.9387	56.8835	56.7737	56.7737
SSDLFNNL	44.6991	43.1413	42.9294	43.1413
SMVDVVML	44.52	44.9241	44.3845	44.9241
SGGSNIIYV	48.7946	49.1988	52.0432	48.7946
FAPIYADL	46.3063	46.5503	45.5589	46.5503
SVSRFNSL	48.2139	45.5292	45.243	45.243
SGVSNPHVI	48.2132	48.0163	48.1729	48.2132
SLIEFSTI	40.701	40.9084	40.8728	40.701
VITTYSLL	53.9126	54.3395	54.7321	53.9126
VHLDLLSL	52.4911	54.2557	55.5196	54.2557
ISPVNPVAI	55.1388	54.6471	55.4765	54.6471
VAVPLIGKL	28.0983	41.0767	40.8515	41.0767
TEVSFTLN	51.3962	51.0673	52.0717	51.3962
STVEFTNL	51.3802	51.0539	52.0431	51.3802
SSLEFSQI	51.3962	51.0539	52.0431	51.3962
SFVTTAER	62.0546	62.1928	63.8681	62.1928
EKAVMVSF	70.5946	69.5695	69.349	69.349
SSVLYSRV	42.8061	43.2688	43.4239	43.4239
FALVFKSV	53.052	53.0672	54.2844	53.052
VSPIILRL	46.4911	45.9966	45.6859	45.9966
SGYSFTHI	48.8571	49.9596	50.7944	48.8571
VEATFGVDESNAK	61.2167	64.1599	68.1093	64.1599
ATMLFAEL	47.7133	47.5362	46.2921	47.5362
AAYGFRNI	42.7663	44.431	44.8296	44.8296
SMILFTSL	40.6461	43.1083	41.578	41.578
SIVPMVHL	49.166	49.2888	49.0112	49.0112
GAPLNLVDL	50.5104	51.4263	51.0253	51.0253
LGKSPLPSL	45.0603	44.958	44.6236	44.958
ARIILVNI	40.2731	40.283	40.5069	40.5069
IMPNGDHI	31.9338	64.1435	64.1352	64.1352
VSPTGTHTL	48.8027	48.0575	46.4317	46.4317
SVVVFQSF	40.8588	40.8336	40.9086	40.8336
GVFSFSRL	48.1142	48.26	38.4995	48.26
SSIVFGRF	59.6247	0.0012134	47.1047	59.6247
KSFLFSAL	48.2654	48.6013	48.718	48.6013
NNYVYAGL	47.3699	49.009	50.5315	47.3699
NVYNYAGL	49.0824	49.1006	49.137	49.1006
ATFPFAML	51.722	49.897	50.3973	50.3973
ATFLYAEV	23.3579	40.8871	41.0836	41.0836
ASFLYAEI	48.9989	45.0214	45.6773	45.0214
DVQLQESGPGLVK	51.738	55.3584	59.0233	55.3584
APDLGQVTL	49.0362	48.0898	48.0093	48.0898
VISTFFTV	42.9758	42.9675	42.9499	42.9499
VMVQPINL	45.3759	45.2136	46.0562	45.2136
SAPINSVLL	52.9378	52.6725	53.8533	52.9378
ITIPMIPL	40.8997	40.7746	40.6874	40.7746
LVAIFTHL	44.2664	43.9885	43.6223	43.9885
GLIGNITLI	41.0392	41.0291	41.0185	41.0185
SSAIYMNL	45.0432	45.0102	43.5808	45.0102
AALANLDNI	48.9524	48.9545	47.9736	48.9545
ATVPPYLGP	48.2811	52.1798	51.9435	51.9435
VINSFVHV	51.2621	50.9987	51.0168	51.0168
ATLVFHNL	49.7542	52.3384	52.1409	52.1409
VVTHFIQA	42.9642	42.9675	42.9676	42.9642
VSAQNLVAI	48.1056	48.05	48.1336	48.05
GSVRNAVVL	46.0066	46.0003	46.6287	46.6287
ITGYFPSM	51.4694	51.8298	52.4321	52.4321
AAYEFTTL	53.9438	53.7215	54.404	54.404
SINGAFGHL	52.9306	53.0042	53.008	53.008
SSYIFSLV	47.0136	46.043	45.0783	47.0136
SQGVGQVQL	44.5283	44.9787	44.9776	44.9787
LSPVYTHV	44.4564	43.5534	43.042	43.042
AALVNLDSL	53.0385	53.2793	53.2614	53.0385
SGPKDVTVL	45.0937	44.9768	44.8451	45.0937
GGNINVETI	46.4836	45.48	44.8838	46.4836
STFSFTKV	47.0261	45.4792	45.1139	47.0261
GINEAGISR	69.4524	69.9441	69.4141	69.9441
LGNVVSDGR	69.5451	70.0392	69.4163	70.0392
TVVSFHQV	48.1281	48.2019	48.2188	48.2188
VTVTFNHV	48.1228	48.1068	48.1544	48.1544
ASIVNKDGL	48.1257	46.2402	45.8794	46.2402
SSLKNGVVL	45.8809	45.8884	45.9013	45.9013
IVPLFTNL	49.725	50.8746	51.3104	49.725
SGLDYSYL	52.1931	52.2497	52.0362	52.0362
HNVSFSNL	42.9669	42.9675	42.968	42.9669
ASYTYLSL	52.6366	52.3453	53.0275	52.6366
VGFIYGYV	52.1501	49.4701	48.9016	48.9016
FGYVYVGL	60.8885	60.9082	60.8952	60.8885
VLTNQETI	43.7036	41.7463	41.624	43.7036
GSIANLTEL	44.7757	44.9074	44.9281	44.7757
TSLKLENL	40.8949	40.7695	40.6679	40.7695
VFIDLPTL	48.3847	47.3592	48.782	48.782
GVLRFVNL	48.82	49.6613	51.1942	48.82
VIVKFAQL	44.955	44.9615	45.1636	44.955
SAGINPFNV	61.3841	61.2966	61.6496	61.2966
GPQNIYNL	42.9632	42.9675	42.9664	42.9632
SAPTGSGKTL	45.0539	45.0184	44.9829	45.0539
ISYRLPGL	40.8726	40.8627	40.88	40.8627
IALRYVAL	45.1197	47.2125	49.1229	49.1229
ESPLFNNV	49.0199	48.954	48.121	48.121
TITTFEHA	51.0992	52.7352	52.894	51.0992
VGPRYTNL	48.9428	53.475	54.0776	54.0776
VSPRGAGYL	40.7907	40.906	40.9988	40.7907
ATRSFPQL	47.8343	50.4123	50.9706	47.8343
ATRLMAQL	40.8909	41.0171	41.0546	41.0171
IGYAFVHL	49.0975	49.0364	49.0261	49.0364
VVPEYVTL	43.4395	48.8402	46.5207	48.8402
AGLVNIVSF	40.831	40.8239	40.8277	40.8277
ATQVYPKL	50.3855	52.2404	53.402	50.3855
VNRSFIAL	44.9557	44.9772	44.7943	44.9557
VAIGNPVHL	48.4238	48.7318	49.3419	48.4238
SGFRLLNL	64.0253	61.1781	63.9603	61.1781
VGIEYILL	52.0196	52.2088	52.638	52.0196
SNVVFKLL	45.5971	47.2652	48.2233	47.2652
FGGLNADNI	56.0871	56.1659	55.9786	55.9786
KTFSYAGF	56.1665	56.2407	56.0995	56.0995
SSLSNAKDV	53.8871	53.7662	54.2322	53.7662
SPTNLEFI	39.8782	40.0572	41.2007	41.2007
TPNISEFL	39.9949	40.4518	45.0637	39.9949
AALYNAGQL	40.8954	40.9653	41.0204	41.0204
KSGMLESGI	38.6913	51.8299	53.0069	38.6913
SAPQYSRL	52.265	52.1705	51.962	52.1705
AFYTVAHL	45.2403	44.6086	42.9642	44.6086
SNLLYVNV	49.1085	56.0991	53.3774	53.3774
TNFLVSQL	45.0743	44.9343	44.8416	44.8416
AGPTNVHLI	50.1122	53.0111	52.7892	53.0111
QSLVFKLS	45.0303	44.6522	43.7144	45.0303
HGYTFANL	50.9824	52.0738	52.0275	52.0275
GSIANFTNV	41.3356	41.0196	40.9819	41.0196
VVYDITNV	42.9634	42.9675	42.9667	42.9634
ATLEFTQL	52.1409	52.2571	52.3123	52.2571
VADKFTEL	45.5814	47.3148	48.0061	45.5814
STFSPALSL	42.9596	42.9675	42.9518	42.9518
RVTSFAEL	49.0124	50.1946	51.1767	49.0124
GAVQNIAHL	60.6566	61.4266	58.0965	58.0965
SAYEVIKL	40.8138	41.3511	41.2241	41.2241
VIAPNPAQL	73.8952	41.0774	65.0042	65.0042
AMGVNLTSM	53.4971	53.1021	53.6075	53.4971
HGYIFSSL	42.2363	40.9869	41.0092	41.0092
AVSNKYEL	44.2925	44.1845	44.7195	44.7195
LQQTYSAL	51.777	52.0706	51.974	51.777
VMFTPLTV	40.9544	40.8819	40.8174	40.8174
TFIDLTTL	42.9666	42.9675	42.9682	42.9666
VPPVNGVEI	58.1263	0.0161947	22.422	58.1263
SYVKGEKL	42.9667	42.9675	42.9681	42.9667
TMQSTVQL	64.1184	64.1155	63.9927	63.9927
SGVEYTRL	45.8851	45.3376	45.12	45.12
VLFDFGNL	43.931	42.7583	42.5162	43.931
VQFVFDAV	40.8896	40.9292	41.3381	40.8896
LSFPYGQL	45.1184	45.4062	45.9549	45.1184
SSLRFTTI	45.0153	44.7895	44.7856	45.0153
QVFIFTGL	51.8486	51.4135	39.9502	51.4135
AAYIFGLGL	45.7358	46.4978	47.1661	47.1661
VRVFFSGL	48.0895	48.1563	48.2095	48.0895
SSLEFTEL	48.2327	50.6343	53.0319	53.0319
SAPEYVFL	52.852	52.3715	53.1135	52.3715
ISDLFPSF	44.9222	44.989	44.9872	44.9872
EIITFTAM	46.812	46.5128	46.3135	46.5128
RAFAFTNV	50.8454	51.8155	51.42	51.8155
SFTKMAEI	42.3806	41.1477	41.0153	41.0153
ASYYAPVR	61.3659	61.4125	64.0953	64.0953
VAFDFTKV	49.8386	51.1281	50.6521	51.1281
SSFVFLNL	53.358	53.3711	53.4115	53.3711
RIYGFTAV	52.9132	51.9488	51.3581	51.9488
SGFVFTRL	45.055	45.1489	44.573	45.1489
ASYLFRGL	49.7876	50.2327	50.2255	50.2327
SALVSSLHL	46.1189	47.1245	47.9244	47.1245
IGLQNGVLL	47.1697	46.9481	46.957	47.1697
TNISFTNM	47.3241	47.8749	48.857	47.8749
FSPSFTEL	42.9662	42.9675	42.9468	42.9468
SNRSYVTT	42.9731	42.9675	42.9479	42.9479
VAPPYPHF	46.3193	43.7197	43.3678	43.7197
SALTGGTAHL	44.9983	44.9974	44.9075	44.9983
IIYPPPEV	33.1739	40.6358	40.8934	40.6358
AQGINVNLV	40.6749	40.9612	41.0186	40.6749
VGLNNINAL	48.0707	43.5058	44.5059	43.5058
VAPLNLGMI	49.8397	49.5177	49.5506	49.8397
GSIVNIIVL	49.4852	48.8531	48.9829	49.4852
GVAGSVLLVL	49.5389	48.8433	49.0325	49.5389
SGIRGLIVL	45.1057	45.1116	45.0498	45.0498
SSMVLTKM	48.1751	48.0623	45.8849	45.8849
ASVVHSTDL	61.4541	61.7964	61.972	61.7964
LSPANGEQI	48.2812	45.8862	45.8649	45.8862
AVQTFSYL	53.7045	56.0555	56.1073	53.7045
AIHNFVEV	45.8648	41.0617	37.584	45.8648
SAFSFRTL	50.245	51.0427	51.6579	51.0427
ASVPNLQTV	45.0961	45.0914	45.0492	45.0492
IAVANAQEL	51.7147	52.7406	53.243	52.7406
SAVPNQISI	48.3814	47.4301	46.5629	47.4301
VENRGLAGI	49.1023	49.1242	49.1244	49.1244
ASIANLINL	45.5372	43.4524	42.3585	45.5372
SSSSNISTM	51.0406	53.3573	64.1872	53.3573
SSTSNFSSL	45.0228	44.5829	45.129	44.5829
AAEVNPESL	54.4279	53.4669	53.1374	54.4279
VAEFTSYI	53.855	54.0714	56.1385	56.1385
EPVTGLDAK	64.0062	63.9506	64.182	64.182
SGPSNLLEI	53.8019	54.0349	54.7194	54.0349
YSAIYSLL	42.967	42.9675	42.9679	42.967
AAIVDGDRI	45.9557	46.587	46.6202	45.9557
KVLELDNV	41.0111	41.0335	41.0436	41.0111
AALLNTDLV	54.0184	54.5141	53.9549	54.5141
VSVANVDLL	54.1672	54.5212	54.7694	54.5212
GSVINEVVL	52.6911	52.5571	52.9891	52.6911
IVLEMVPL	30.1119	40.58	40.9913	40.58
GTIVNGKQI	44.79	44.9033	44.9309	44.79
TIIVFHSL	51.5652	52.2546	52.1774	52.2546
KMVVLLNL	53.0506	52.9961	56.1513	52.9961
SSYAYSRP	48.9469	49.2498	49.1235	49.1235
STRVYASM	48.1088	47.9949	48.0465	48.0465
YAHINALE	44.6606	44.9333	44.9358	44.6606
RGVDYHAL	42.9622	42.9675	42.9649	42.9622
QLENVSAGL	41.1583	41.2247	41.2584	41.2584
VNVPFANGI	40.8426	40.8446	40.8858	40.8446
VGITYQHI	46.9997	46.819	46.5637	46.5637
AKITAQEAV	41.9985	41.7475	41.8423	41.9985
ASLVNADKL	49.5679	52.0532	52.9102	52.0532
ISTQNVVGL	42.9674	42.9675	42.9684	42.9674
VFVEPVQL	40.9494	41.0209	41.0017	41.0209
IIQEFPAL	50.0036	50.4063	50.2176	50.4063
RAPDFVLL	44.8145	44.8478	44.8729	44.8729
SLGISLVEL	50.3252	50.0348	49.4983	49.4983
TKLQTINL	53.5666	55.5337	55.7146	53.5666
TIPLFVQL	40.577	40.4712	41.2305	40.577
VSRLFPVL	52.997	53.2035	53.1711	52.997
RSMMSAYERSM	56.1756	56.2242	56.1608	56.1608
ASYEFTTL	53.5869	53.5571	53.8552	53.5869
INYQPPTV	42.9591	42.9675	42.9549	42.9549
TSPVNPAVF	44.5539	43.3727	42.6667	44.5539
SIRNLDTI	45.195	45.1474	45.1357	45.1357
VGYRQPLV	42.9595	42.9675	42.9478	42.9478
VSPLFQKL	46.904	50.8492	50.6924	50.6924
GVVRFLQL	40.9736	40.9981	40.9775	40.9981
TAPSSQQTL	48.0733	48.1769	48.4958	48.0733
NSIRNLDT	42.9597	42.9675	42.9593	42.9597
TNINFPNL	48.9667	48.9833	49.0113	48.9833
SIVSYNHL	45.5465	46.7769	46.9071	45.5465
AGILDTETL	40.9847	41.241	41.3243	41.3243
IAFGFHQL	44.9584	45.2529	45.0823	45.2529
GTINNTVTL	53.1524	52.9327	51.4251	52.9327
RSLSNSGVL	52.9852	53.01	52.9773	52.9773
GSLKNVTTL	47.3639	51.4072	50.8341	47.3639
VSPRLTFL	44.6627	44.1128	40.5083	44.6627
AVIKFLEL	45.8027	45.0892	46.0911	46.0911
ASYVYLSM	52.9067	51.9389	53.0752	52.9067
STLQGADEL	49.0839	52.2941	51.6771	49.0839
AALVNPDSF	40.7961	40.7998	40.7821	40.7998
EAPSFLNGV	53.1792	52.7099	52.9589	53.1792
TTVANVETV	48.9839	49.0478	48.9452	48.9839
SIISNTEAV	51.0983	53.076	53.1017	53.1017
VLEEFPSL	29.7126	40.6162	40.8919	40.6162
LSPQFTQL	52.0396	52.348	48.0465	52.348
VNVDIINF	52.8343	52.853	52.8447	52.8447
YAPAAATVAV	47.634	47.9037	47.4642	47.9037
VGPRYTQL	51.9172	52.0513	52.9499	51.9172
PHVPGVTNL	9.42589	41.7209	42.0422	41.7209
SSPKSTLTL	41.0625	40.9395	40.8793	40.8793
FPLTTEIL	49.0295	48.9822	48.9439	48.9439
ALINKDFL	41.9425	41.8108	41.6921	41.9425
VGPTLKATF	42.9627	42.9675	42.9676	42.9627
LSMKTLQL	45.3868	48.6762	48.8987	45.3868
SALRFLNL	49.0336	48.9311	48.9344	48.9311
FNIRVATI	43.811	44.5006	44.5468	44.5468
ISARFVQL	49.8691	49.2427	48.7577	49.8691
ILSRFALN	50.5616	50.7612	50.8297	50.5616
VLIEFSLL	45.3351	44.7284	44.3047	45.3351
AAYSFYNV	51.7262	51.6785	52.7598	52.7598
SSPLNSTQT	42.9664	42.9675	42.9463	42.9463
AGIALNDNF	64.5212	64.7321	64.6911	64.5212
SAIMNPASK	41.8493	44.9757	45.0288	41.8493
QNAVYINL	41.0326	40.8733	40.778	40.778
IIPMFSNL	47.6995	48.647	48.1706	48.647
IAVSFREL	48.0405	51.4791	50.824	50.824
TITSFPRL	45.0044	45.0592	44.973	45.0044
SALLSIAFL	42.9813	42.9675	42.9553	42.9553
TIILFTKV	50.6659	50.4223	50.5034	50.5034
ASITFEHM	42.968	41.6596	42.0972	42.968
YSLPNAGDV	41.45	41.1512	40.9692	40.9692
NSLERMGL	48.7838	47.8441	45.5246	48.7838
SSSTNVDLL	44.9881	44.5935	44.231	44.9881
TNYQLPSL	47.9187	48.2107	46.7113	48.2107
DPKFEVIDKPQS	40.9527	41.0342	41.0944	41.0342
SVGVNLEAF	19.193	41.7155	42.1315	42.1315
MGLSNVTVV	48.1615	47.3659	46.1371	47.3659
IISTFQNL	44.3604	44.144	44.2385	44.3604
VNVRFSTI	47.1211	49.0957	49.6861	49.6861
SGLVNHVPL	52.7013	52.4876	49.6898	49.6898
SQIVFRSV	52.0837	51.0721	50.1601	50.1601
SNYKVVLL	45.8506	45.8537	45.856	45.856
SLKNFITI	40.8311	43.7006	44.4652	40.8311
HSPSFTNF	68.0336	65.2734	65.6648	65.2734
NGVINAAFM	51.9787	51.3266	51.2887	51.9787
SGPLDSTFI	41.3397	41.0848	40.9424	40.9424
LGAMRMLL	47.0417	45.0689	44.9941	44.9941
TITDFINI	40.7992	40.9509	41.0258	41.0258
AVVANVQHV	45.3713	45.5387	45.3172	45.3713
SLLSFEKI	42.9656	42.9675	42.9687	42.9656
SLVTFRTL	45.2112	47.0606	46.9328	47.0606
KGPVYLLF	45.8669	45.8585	45.8593	45.8669
AAFTYDHI	42.9664	42.9675	42.9683	42.9664
RGPTYVNM	53.9478	51.4532	47.8322	53.9478
SAVEFRQT	52.1851	49.9287	14.5391	52.1851
VSDFGGRSL	41.1449	40.9799	40.881	40.9799
SSLHFSFL	43.2751	43.3335	41.1796	41.1796
LSYSFAHL	57.6193	57.1793	56.5063	56.5063
SSLINGSFL	52.7287	52.6511	52.4656	52.6511
VNVDYSKL	47.4161	51.1374	52.6209	51.1374
SVASNISFI	47.9827	47.8481	46.4448	47.8481
SNLQYSLL	50.1887	51.8715	51.7045	50.1887
HILANADAI	44.3045	44.9858	45.6838	44.9858
TNVQYSNL	42.895	46.7612	48.8813	48.8813
ASAVSNNYI	40.9088	40.8621	40.8341	40.8341
VGVGLYPSM	30.2755	40.7022	40.8736	40.7022
IAVQFVDM	46.3002	45.8828	44.3062	45.8828
SAVTTFEAL	41.0313	41.0025	40.9877	40.9877
FIRGGNKM	56.244	55.176	56.534	56.244
LAYLFAQL	52.523	51.741	51.6254	51.6254
VFYAVKVL	48.7285	48.1649	47.3839	48.1649
PRVLLLDL	49.6956	0.162135	0.000538268	49.6956
VAMANTVAM	46.1552	49.866	49.886	49.886
GVDNPGHPF	42.9666	42.9675	42.9467	42.9467
TAPEYVFL	51.6485	52.5964	52.3754	52.3754
AIFNFQSL	49.4925	49.4563	48.3418	49.4563
VAYGFRNI	49.4132	51.808	51.8473	51.8473
SVYPFTLI	45.1162	45.0549	45.0538	45.0538
KNFAFTLV	27.515	40.933	25.3005	40.933
AMGTQGNVM	41.1922	43.2203	44.5725	44.5725
AAPSDTHEI	78.1257	54.091	102.59	54.091
ATYPYQVV	49.1513	49.5019	49.9257	49.1513
AFEFINSL	49.0668	58.4887	63.9016	49.0668
RGYEFLGV	48.7382	48.6327	48.8675	48.8675
IHFISPNI	64.2174	64.27	50.6815	64.2174
SAYLFVKL	50.3062	53.0128	52.3897	52.3897
VKYLFTGL	42.4945	43.5677	43.6889	42.4945
SGPGFGMSSV	49.0984	49.1207	49.1337	49.1337
FSPYNGGSL	23.5262	40.606	40.337	40.337
IDYSFPSL	46.296	46.7231	46.4801	46.4801
SPFSYKNV	54.0637	54.0895	54.0845	54.0637
YAFNGGTVL	42.9664	42.9675	42.9683	42.9664
ASLSNLHSL	42.1855	44.6591	43.619	43.619
VAFNYKTV	41.6513	41.8412	41.974	41.974
SIYIFTVV	53.0319	53.0284	53.0447	53.0284
SSYTFPQI	53.8771	53.2283	53.6453	53.6453
VNHDFTPL	42.9658	42.9675	42.9686	42.9658
SSLLDSAHL	45.8451	43.9172	43.3264	45.8451
TAYEFAKL	52.9717	52.9661	52.693	52.693
TAPHYQLL	42.9658	42.9675	42.9551	42.9551
SQVINPTAI	52.9187	53.0269	54.4133	53.0269
VAHTFVIGV	45.8755	45.8738	45.8724	45.8755
AALKLGQEL	43.0525	42.7635	42.6799	42.6799
SQMMGGMGL	2.91871	64.7914	64.6958	64.6958
SIYETPSM	41.1733	42.9534	43.5361	43.5361
SDYVYPSL	44.853	44.3212	43.9483	44.3212
VAFAFELM	38.0993	38.9905	39.6906	38.0993
SAPDNVLEV	48.7472	47.8965	47.9937	48.7472
TTFVFTEV	45.503	48.1152	48.1631	48.1631
VSYVFTEV	41.8517	43.6201	43.786	41.8517
LGYSYVEL	53.3008	53.1904	53.6396	53.1904
AVYTFETL	53.2791	53.2002	53.7043	53.2002
VNFVHTNL	46.219	51.4569	52.2099	52.2099
KAPELGDTI	52.9695	52.8452	52.8388	52.8388
TIIIFHSL	49.1811	51.2249	51.7974	51.2249
IGPRFKLL	55.2937	52.8789	57.8512	55.2937
SGYDFSRL	47.7347	47.8707	47.9553	47.8707
SAYLYQSL	18.5958	45.2927	45.4458	45.4458
STFIYNSI	58.3167	64.0561	56.6278	58.3167
AAVIDEDVL	44.9119	44.8934	44.9114	44.9114
ELRSPTEL	46.4751	49.9526	51.7427	51.7427
DIRDLEAI	41.8154	17.6128	11.0459	41.8154
SQIGNLEAL	41.3973	41.2676	41.7834	41.3973
AGLQFPVGR	45.2315	45.1339	23.5472	45.2315
VGLINKDSV	48.0111	51.2474	52.2929	51.2474
PFLGIVAEV	40.7373	40.8455	40.8568	40.8568
VAIMVLEGL	41.4024	41.3227	41.6702	41.6702
LFHLKSSL	28.2488	0.269491	64.6986	64.6986
KAIVNVIGM	44.5852	44.0958	45.3805	44.5852
GSPVNGSSQL	49.5124	11.4193	37.5053	49.5124
SWIAVQEL	48.136	47.6341	47.58	48.136
VAPTFSPNL	42.9642	42.9675	42.9676	42.9642
AAPSNLPYL	53.573	53.6704	54.1434	53.573
SSPVNPVVF	55.1995	54.1951	55.3502	54.1951
VFYGVFTL	47.9732	48.2965	48.4452	48.4452
VAVNLIMGL	50.6976	49.4336	48.1943	49.4336
AGYMYTQL	51.3571	50.6939	52.33	51.3571
TQYTFSSI	48.986	48.6164	46.5796	48.6164
TSGHFERL	44.9266	45.3696	45.9705	44.9266
AGPRGMGTAL	51.6294	6.92918	6.59855	51.6294
STVVNADQI	48.0924	45.1155	44.9799	44.9799
YAPINANAI	57.5876	57.2321	58.4377	58.4377
NTVTGRWL	51.2422	51.6746	55.4812	55.4812
ANFPRATGL	40.8858	40.956	40.9764	40.956
SSIVNSIQV	52.9386	52.9483	53.1975	52.9483
SAGAKELTGL	42.963	42.9675	42.9684	42.963
SSIVNKEGL	50.9211	53.0813	53.0772	53.0813
SQALNTTVL	48.7053	49.6725	53.6449	48.7053
SLFAVLPSL	61.5708	52.8073	62.221	52.8073
VIVRFLTV	48.3079	50.3946	51.8578	50.3946
SHHSMVSM	42.9666	42.9675	42.9682	42.9666
SAPAASTETL	47.8957	30.4865	13.6231	47.8957
YAIGNAPEL	29.3161	38.0381	0.00183303	38.0381
ASVSNPLFL	51.3794	51.0491	51.3259	51.3794
TVIGAFLNL	45.0707	45.0331	45.0041	45.0041
ALLQYINL	44.8887	46.1368	45.1512	45.1512
STFVYNSM	49.5925	49.5479	49.9244	49.5925
SSPQFVGNL	45.0804	44.9315	43.3954	43.3954
SGYKFFSL	48.816	50.4219	51.7306	48.816
SLGKNTESL	41.4141	63.9227	64.0424	64.0424
ATLSNTQTL	42.9649	42.9675	42.9474	42.9474
SSLVNSQTL	51.8081	50.3868	52.8637	51.8081
AGLEVYPSI	48.9394	46.085	48.8751	48.9394
RAPSYIEI	44.0338	43.9297	43.0366	43.9297
AQIRFSNI	42.9592	42.9675	42.9542	42.9542
VGVVSVEFI	44.6923	44.4556	43.7487	44.6923
IIITFNDL	49.3832	50.4593	50.5664	49.3832
VITEFARI	42.8785	42.4385	44.0925	42.4385
INLSFNKL	40.8266	40.9326	41.022	40.8266
KVITFIDL	48.9087	47.9815	48.854	47.9815
ISLLYNLL	48.0733	48.0237	48.0908	48.0237
AANVNAKDM	64.106	64.1407	61.2452	61.2452
SIFEFVHA	44.3755	43.8056	45.9368	45.9368
GSLVCFPNL	42.9592	42.9675	42.9679	42.9592
IGYIHSLM	42.9647	42.9675	42.9681	42.9647
TQQLYPSL	47.4042	48.5953	50.0763	47.4042
AGVSNIIEF	49.3308	49.4811	48.444	49.4811
VGINYREV	40.9635	41.0556	41.0461	40.9635
AVDRFQTL	42.976	42.9675	42.9502	42.9502
GIMRFVNI	43.2917	46.3247	47.3872	43.2917
SVIGSIFNI	48.1842	51.8627	51.3615	51.3615
SVIKFENL	48.1797	51.8642	51.3636	51.3636
VVYVLPML	40.5655	40.8057	40.9204	40.9204
SLGINPHVL	48.3065	48.0422	47.9203	48.3065
TALLNAPHI	52.7878	52.3011	52.0183	52.0183
SNLKYILV	47.5811	50.5489	51.1267	50.5489
SAFEHTQM	42.9595	42.9675	42.9585	42.9595
AIPEFMNL	40.6647	40.8838	40.8671	40.8671
STWVFPTL	52.5643	49.5637	46.0526	52.5643
VGWKYQAV	42.9673	42.9675	42.9677	42.9673
KVVEFSEL	44.8733	44.9612	44.5016	44.9612
TIVDFLSR	45.8686	46.0742	48.1603	46.0742
IILKYIGM	45.0459	45.0416	45.1721	45.0416
SVMENSKVLGEAM	53.0701	52.7245	52.9288	52.9288
SSYIYGYV	42.9809	42.9675	42.9527	42.9527
GSIVNEGYL	47.3034	46.2525	46.4471	46.2525
SGIQAAYEI	49.042	49.044	49.1358	49.042
GSSPKFSEI	46.0264	45.8825	45.8787	46.0264
SSVLNVVSM	53.0013	53.0165	53.0722	53.0165
FGPINSVAF	49.6733	49.3147	49.2152	49.3147
ISVSFYHV	50.9685	50.788	50.5993	50.9685
VSYLFSHV	49.1297	51.2264	55.1675	49.1297
AVFTWTNL	50.6959	49.1047	46.7718	49.1047
TSVRFTQL	46.6729	49.9258	51.6181	51.6181
IAFIFNNL	54.0512	54.4047	54.1624	54.1624
KVLVFSQM	40.8339	40.8805	40.8998	40.8998
SNFTFSHL	42.9876	64.2096	49.8657	42.9876
GAVFNQVAF	42.9666	42.9675	42.9682	42.9666
AMVEFVKL	44.8479	45.0089	45.0788	45.0788
IFFIVSQV	45.2539	45.0484	44.2897	45.0484
SAFIFRVL	45.3971	45.5303	44.3139	44.3139
HIYSFSSL	42.9608	42.9675	42.9624	42.9608
VSVYYSHV	49.0948	48.8931	48.6961	49.0948
RTFSWASV	45.1078	44.54	44.2401	45.1078
ASHLNLDAL	50.7791	50.8843	50.2426	50.8843
EGIINGHTL	42.967	42.9675	42.9679	42.967
NVFTFVNL	49.3716	49.1086	49.0573	49.0573
ISLYFPTL	53.0248	53.0118	52.9885	52.9885
LSHGNLTVL	44.8462	44.7248	44.9463	44.9463
AQFKFTVL	47.6689	48.505	48.2432	48.2432
VNTHFSHL	60.7572	59.0777	52.5185	59.0777
QVYGFLEV	46.398	46.2642	45.6473	46.2642
AVFTFEQL	50.8976	51.2397	50.6461	51.2397
VMFTLTNL	48.884	47.8635	46.7529	48.884
QAYVFTLL	41.8777	22.556	16.0052	41.8777
STILFFNL	50.7997	50.1969	49.4205	50.1969
KGYIFLTL	49.0603	49.0726	49.1518	49.0726
YSLSNTISA	42.9647	42.9675	42.9682	42.9647
GTNVSTTYI	42.9645	42.9675	42.9679	42.9645
AEYIYPSL	41.8398	43.4799	44.2071	41.8398
AVYQFGSAL	49.0599	49.0509	54.0042	49.0509
GLFTQYNI	50.3024	50.9556	50.2963	50.9556
SQFKYALV	44.217	44.1513	44.0421	44.0421
TGYNIQNF	34.463	45.6291	46.5141	46.5141
SGHTNAVATV	48.2563	48.0703	48.1435	48.2563
ANLIYYSL	45.4216	45.3642	44.9841	44.9841
SAIHNSTKV	53.3171	53.1047	53.0821	53.3171
AAVIAHDFL	41.1887	27.3331	41.8978	41.8978
AGLTHLITM	45.9841	45.944	45.6804	45.9841
SVIQLLHM	42.9746	42.9675	42.9486	42.9486
RNIQNAGAI	47.9936	45.1225	45.0057	45.0057
VAVVNKVDI	47.8265	51.878	52.9585	52.9585
SMRNTSVM	42.9669	42.9675	42.968	42.9669
SNYSYPQV	49.02	48.9681	48.3479	48.9681
SIDYYPSL	46.4247	49.161	49.1693	49.1693
IDYEFSAL	45.8766	46.4642	46.6117	46.6117
GSLSNHTEL	47.9566	44.9923	44.9672	44.9672
TAAHAADSTL	42.9613	42.9675	42.9634	42.9613
SAPANPSSNI	42.9629	42.9675	42.966	42.9629
GGHVNLTML	14.1552	47.1121	47.7761	47.1121
VIYTHPEV	42.9879	42.9675	42.9582	42.9582
ISPAYFFL	41.4533	43.9786	44.958	41.4533
VNSIFQHL	44.9907	44.5417	64.0219	44.9907
TNVLFNHL	44.9783	47.1367	45.894	44.9783
QGQIYVHL	42.9611	42.9675	42.946	42.946
KAPVDDVTL	47.97	47.6736	47.587	47.97
AVLTNPETL	49.5393	48.9472	49.7378	49.5393
GSLVNQNLL	48.9766	48.8533	48.787	48.787
KNVLFSHL	41.3626	41.188	41.1156	41.1156
VWLEAARL	54.0859	48.45	48.6139	48.6139
VNIPFVRL	45.3283	45.1934	45.1049	45.1049
STFGQNTGF	40.8331	39.7947	27.9	40.8331
ISPNFSFM	44.8364	44.9663	45.0539	44.8364
STLTYSRM	43.8289	23.9037	48.2432	48.2432
SIHGVGELM	41.1694	41.1818	41.134	41.134
KTFTFDTV	41.5949	41.7149	41.8749	41.8749
RAIDNAADL	49.5583	49.3781	49.176	49.176
AQFEHTIL	49.3037	48.4057	47.6468	48.4057
GIENIHYL	53.7893	56.1677	56.1001	53.7893
SSPSNLQII	44.6674	44.7087	44.8679	44.8679
ALIQNADTL	49.577	50.4589	51.146	49.577
KSNVNIGNL	44.7307	43.8403	43.7821	44.7307
VGVNNPVFL	51.7577	51.4691	51.8643	51.7577
AMPINKATI	48.1132	47.9816	45.8916	47.9816
KATINIDAI	47.9164	47.6832	48.0536	47.9164
NVLSKADVI	51.7246	51.7904	51.7191	51.7904
SAVENVVKL	46.9416	46.4073	45.7843	46.9416
GSLRNVLSL	53.0051	53.012	53.0086	53.0051
IGYEHEVL	42.9675	42.9675	42.9675	42.9675
FLQNSTHL	47.8254	47.1871	48.4226	47.1871
KGYAFINF	53.0148	53.0688	53.143	53.0688
ESPINVTTV	43.0862	43.3652	43.5412	43.0862
EAVVNTVDI	31.0087	40.924	40.9418	40.9418
NSVINVSNL	47.2404	46.9927	46.7155	47.2404
ASQANKDLL	53.0087	52.7797	52.6088	52.6088
SGLLNQQSL	49.8555	50.2672	52.0766	50.2672
TFLSIEHL	51.132	51.7807	52.9247	51.7807
FSVHFPLL	52.4038	53.0546	53.0299	53.0299
DALTNLTVL	46.2418	45.7449	45.7312	45.7312
TLGINDTLI	56.4407	43.5425	56.1829	43.5425
KAVSNINTL	41.0508	41.1884	40.9616	40.9616
QIIPFKTL	43.7086	44.2398	44.4578	44.2398
VALLFRQL	51.4215	52.0853	52.2373	51.4215
SAFDFENM	33.346	42.0287	43.4737	43.4737
AMPSNSPVAA	42.9809	42.9675	42.9525	42.9525
SSYTFPKM	51.9257	52.5694	50.4725	52.5694
TSFRYSSL	56.247	56.0338	46.5142	46.5142
VNHLYSDL	40.5445	40.1095	45.3492	40.5445
SALVSSLHM	41.2056	41.2294	41.2295	41.2295
VSSINQEAL	49.132	45.5622	42.7563	42.7563
RSGVNSELV	41.0386	40.9907	41.195	41.195
KELNWASI	42.9674	42.9675	42.9687	42.9674
VRSGPFGQI	42.15	41.8138	41.8211	42.15
ASNVSKELL	48.1993	45.1358	44.9888	44.9888
VTVVNSQTL	31.615	29.6546	45.1153	45.1153
GAPINKYVV	40.8789	41.1189	41.1906	41.1189
VFRELPSL	45.2819	48.8586	48.7093	48.7093
LGPKNGVYI	45.3823	44.4049	44.8364	45.3823
VWIPSVFL	50.7373	50.9985	51.4894	50.7373
ARIIFNQV	40.6594	40.8786	41.5167	40.6594
LVLEFNLL	41.0202	40.9613	40.9168	41.0202
VLLQFNLI	41.0204	40.9666	40.9171	41.0204
SIYRVPLL	42.9671	42.9675	42.9679	42.9671
SSMAFKQM	65.1277	65.0969	36.9355	65.0969
SMAENSIPL	47.5481	48.7134	48.8999	47.5481
KAFTHGVAM	47.3083	47.2262	47.3459	47.3459
AAVENLPTF	45.2011	45.1868	45.2798	45.2011
ATVGPISVAM	42.8645	44.2606	43.0353	42.8645
ATFIFSYI	37.7099	47.1473	49.2868	49.2868
FALVNGNNI	42.5608	52.9469	54.0449	42.5608
VNFINQNL	28.489	22.6121	40.9843	40.9843
TSPLFLHF	42.9605	42.9675	42.9564	42.9605
TALENLSTL	51.5291	51.5696	52.1274	51.5291
ASLTLNETI	45.1013	45.0397	44.7497	44.7497
SSNLSLDIL	44.8952	44.5512	44.3707	44.8952
DQIPKFTI	48.9837	48.1759	48.4779	48.9837
VPFEFPLL	41.8432	41.2067	41.0174	41.8432
VNVEFVRV	54.8423	54.5885	55.9114	55.9114
SQITSLVTL	64.2853	30.4118	23.8649	64.2853
LSTAGTVVTI	41.0529	40.9744	40.9727	41.0529
VNLVFEKI	34.2369	35.9272	41.7458	41.7458
YAIALINAL	42.9674	42.9675	42.9675	42.9674
STFIYNSM	50.0137	48.9366	48.9034	50.0137
QMGVNPTSI	45.0431	45.1267	45.2328	45.0431
TLINEEML	64.7625	64.8099	64.8288	64.7625
ESPEFVRV	41.0373	41.0245	41.0198	41.0245
SSLQNLTSL	59.018	58.8038	60.9631	58.8038
TALRFLEL	45.1026	45.1484	44.8298	45.1484
RVIDFTVL	56.3321	56.2823	43.4709	56.2823
AGYTFEYL	42.9758	42.9675	42.9499	42.9499
AGNINQSLM	45.4824	45.2443	45.1802	45.2443
ATQQFQQL	45.3407	46.3258	45.8219	45.8219
VMLHSFTL	44.1773	44.7024	44.7075	44.1773
TGTTNPFLL	50.6141	50.3333	49.4894	50.3333
SGLLNPYSL	48.1028	48.1276	47.33	47.33
STVFNPSVL	45.815	56.6478	56.6066	45.815
VMVTNVTSL	52.5134	52.5849	53.7429	52.5134
MQLTPFLI	50.2374	50.7077	50.7789	50.7789
RVDVFTNL	42.5649	52.2288	49.3564	42.5649
SFLDVRNL	47.1597	51.4685	51.5348	47.1597
AAPPPGIVEI	48.0927	48.2553	48.8393	48.2553
SQLIYNLI	45.0197	44.9832	44.943	45.0197
SVVRYVQL	42.8791	43.5109	43.9821	43.9821
QSYILRAL	48.0713	46.1176	48.048	46.1176
IYVGRVVSA	53.4033	53.0954	53.1836	53.0954
GSPVNTQDF	65.2401	65.8348	54.6622	65.2401
GSPMNTTQL	49.151	49.0778	49.0158	49.0158
VPVSNQSSM	44.7006	44.9803	45.0587	44.9803
TASFSTTHL	44.7702	45.0911	45.1347	44.7702
FSVQNEAGL	42.9594	42.9675	42.9526	42.9526
SSVQNGIML	47.2741	47.514	46.4823	46.4823
SRIEEALM	52.4753	51.9676	46.3267	52.4753
INSQLCSVT	45.2178	45.067	45.0599	45.067
IQTSFQQL	40.8196	41.8046	42.5099	40.8196
RSPEYLSL	47.8882	50.6199	51.1573	51.1573
YALTNIQAA	45.0227	45.1269	45.1651	45.0227
SSTTNIDDL	42.9638	42.9675	42.9671	42.9638
ESVEFQNL	44.1289	43.4474	43.7339	44.1289
SAYLYSYV	48.2477	48.3885	48.106	48.106
STFTFTYV	52.4287	49.3219	47.1352	47.1352
ANFTFPRL	26.3422	46.7178	49.4481	49.4481
ITGMFQRL	40.9432	40.9805	40.9722	40.9805
KSLDYLNL	43.2776	47.0501	49.0604	49.0604
IGLGYTQTL	42.9671	42.9675	42.9679	42.9671
VAYKMQLL	41.7868	18.0891	1.74328	41.7868
VAYLMQKL	45.8802	45.5077	45.2555	45.8802
YALKSLTGL	40.9337	40.7679	40.6918	40.6918
SNQSIPSMS	45.0029	46.2712	47.8868	45.0029
SGIIDSDFL	45.3101	45.1079	44.8089	44.8089
PNFIMTML	42.9673	42.9675	42.9469	42.9469
VMPYLSQL	42.9587	42.9675	42.9462	42.9462
NAYKFPNL	48.71	47.2616	47.0629	47.0629
EITTFSRL	41.8191	41.6869	41.8415	41.8191
VAYKFPEL	46.7648	43.5982	45.3504	46.7648
VMYQVVVI	44.8271	44.6778	44.1241	44.8271
SLVIFMQL	45.0661	45.162	45.1585	45.162
KVAVNDAHL	45.1386	45.0198	44.9769	44.9769
ASVLNVNHI	47.9793	52.463	53.4074	53.4074
KVFQFLNA	44.8301	44.466	44.2814	44.2814
FALRYALL	53.4874	52.9695	51.8365	51.8365
VIFIFTKV	49.0561	49.0354	49.0311	49.0311
SNVTNATNF	53.4036	53.1808	53.2401	53.2401
STFEFHSI	46.4542	49.8061	49.2767	49.8061
FGGSNPFEI	44.7586	44.1477	44.0309	44.0309
AIMPNGDHI	45.2441	47.9904	46.7512	46.7512
YSGVNVTDL	49.0152	49.0222	49.0555	49.0222
TGLLNDSTF	25.7051	41.036	41.0785	41.0785
STIHFYSL	46.0672	45.8696	45.8588	46.0672
FSVVNPASF	40.5503	37.7688	42.7049	42.7049
TGYLNTVTV	40.4597	40.3011	40.2653	40.4597
ILQNHTEI	48.2575	47.9982	43.5448	47.9982
TAFQFLQL	50.0643	49.3641	50.3388	50.0643
AQYNFILV	48.0094	47.9046	49.0515	48.0094
AVVANSFFI	45.4579	47.4198	47.485	45.4579
QVFDAKNM	53.3695	52.525	52.0368	52.0368
SAPRYMDL	49.9041	38.2352	41.4273	49.9041
AFDYPSRL	45.458	44.6151	44.4871	44.4871
GSLNNTLHL	64.1507	63.9855	25.585	64.1507
AQLPNDVVL	53.3075	53.3496	53.2512	53.3075
INVPNAEVL	47.2032	49.1898	49.2812	47.2032
QVVIIHML	44.3992	44.7227	44.644	44.644
ITFIFKSL	48.897	48.9145	48.8921	48.897
GQAESLDHL	44.5312	43.8848	44.0285	44.5312
ASLTSRTSM	50.0348	49.5822	49.6955	49.5822
EVYNFNAI	24.5666	32.4759	51.8449	51.8449
STIEFKNM	44.4536	55.2134	59.0815	44.4536
TAYAFHFL	49.0642	50.6669	51.2234	50.6669
AQITGTEHL	77.8904	64.0417	39.8606	64.0417
VNIYYGIQ	48.9755	48.7351	48.1606	48.7351
VVYPFPTF	45.6721	45.5689	45.4497	45.6721
RAYLFNSV	46.724	47.4144	48.0669	46.724
RIYQFTAA	41.0053	41.1233	41.129	41.0053
FNYKGKNV	48.1444	48.0232	46.2205	46.2205
KAFTYINL	53.076	52.6682	52.1012	52.6682
VTFSFKQL	42.9669	42.9675	42.968	42.9669
AAVSFISKF	60.8163	63.791	63.9756	60.8163
AALQNLVKI	48.1662	51.1192	50.6607	51.1192
SGVEFREM	48.3156	45.1304	45.0392	45.0392
STPEFYQV	41.5422	44.3986	44.9818	44.3986
NSFRYNGL	40.6389	40.809	40.879	40.809
TGLPYYTGV	45.6949	45.3425	44.874	44.874
TAFRFSEL	46.6211	48.7693	48.9306	46.6211
VNLPWNQV	37.605	36.8438	20.7678	37.605
AAPFDTVHI	47.1381	47.65	50.0967	50.0967
FQAINAGHI	45.0621	44.4299	45.0829	44.4299
KYVYVADI	52.7896	52.6554	50.0864	52.6554
TSYRFLAL	52.6909	52.5266	52.728	52.5266
NAQRNALAI	47.3892	48.7246	48.5573	47.3892
ISENGPLKI	45.0415	45.0397	45.007	45.0415
SVYVYKVL	45.416	47.922	47.723	47.723
AIVERAAQL	48.23	47.0464	47.0831	47.0831
FVQMMTAK	64.0729	25.6323	41.4597	41.4597
ISYQFSNL	51.995	51.0045	52.077	51.995
TWLSDPPGV	42.9712	42.9675	42.9474	42.9474
AQYSFDKL	49.1859	49.0185	49.0107	49.0107
GAIENAFHL	45.3343	45.2781	45.2269	45.3343
HGLVNPTSF	47.8977	45.8789	45.877	47.8977
LEQQNQVL	43.0804	48.0512	47.9497	47.9497
GVVRNNEAL	32.2874	40.7736	40.817	40.817
LAQRLAGNEQVTR	61.3356	61.4758	61.3354	61.4758
ASFSAQTNM	42.9665	42.9675	42.9549	42.9549
DVQLQESGP	55.5021	55.883	56.8447	56.8447
TNYIFDSL	50.867	51.3425	51.4596	51.4596
SWLHTSEL	61.0978	60.0847	7.34991	60.0847
GANVNQRDV	48.0619	48.173	48.0727	48.0727
KGFEFTLM	46.7876	46.185	45.5125	46.185
MTFLFANL	50.5668	52.0364	59.7337	50.5668
SSFVFSTVV	43.4123	43.8261	45.6961	43.4123
YNIVYTSL	54.7378	54.4517	54.8645	54.7378
EIVSFQHL	46.6165	46.6113	46.5992	46.5992
HINALEYI	51.9675	0.0264114	53.0778	51.9675
PRANPSAFL	37.549	37.2724	18.3192	37.549
ALVENSQVI	42.9624	42.9675	42.9652	42.9624
VQIANPAFI	51.246	50.6679	48.3274	51.246
AWVKIENL	42.9636	42.9675	42.9669	42.9636
ITVKNPAVM	47.5593	49.542	47.6927	49.542
IQIANVTTL	49.8258	50.1033	50.6589	50.6589
QGYQFPSM	35.3438	40.4039	37.0181	37.0181
SVLEYSEM	53.911	54.1434	53.895	54.1434
TAATFGTASM	45.4294	45.1322	42.7951	42.7951
DIYSFSEL	40.6494	40.7359	40.7073	40.7359
FSFGNTSTL	41.5555	41.2276	40.8046	40.8046
NTHEFVNL	31.95	40.7496	40.5095	40.5095
MFSKSLNF	48.1089	48.0415	46.4126	48.1089
SSPLNDDLL	36.8286	60.971	60.9261	60.9261
YQGPGIPEL	45.2652	44.5229	43.8268	45.2652
LGGNEQVTR	61.4356	61.4173	61.4763	61.4173
LAFLYMTV	61.5284	61.3815	61.341	61.3815
KNVTFEHV	45.4871	44.3801	44.2941	44.2941
RHYGGLTGL	57.5481	61.7748	61.5276	61.5276
IAIVNYANLNGSPL	47.5246	43.9688	39.5131	39.5131
IGPDNLVFV	35.5189	45.6815	46.8814	46.8814
AQLPLADFV	49.7672	48.3845	48.4558	48.4558
LSLENIATL	40.792	40.8013	40.8652	40.8652
IAVINALFL	45.1101	45.0921	45.1026	45.1101
KSYSFDEV	45.8851	45.8804	45.8811	45.8811
SAPENAVRM	51.7258	51.7167	53.0185	51.7167
IAMEFNHL	47.0606	51.2094	50.6832	51.2094
ASLTNNQNL	51.6038	58.2122	64.1948	64.1948
AIMENANVL	39.275	26.1746	40.8296	39.275
GNVECLNLL	52.5487	53.0194	52.9001	52.9001
VNTFFSFL	48.2603	46.6444	47.4757	46.6444
AALENDKTI	46.2906	47.373	48.0147	47.373
ATLENVTNL	46.9355	46.5642	46.3237	46.9355
IDLIEKPM	53.6927	54.4854	63.9837	54.4854
STVRNADVI	53.0751	53.3662	53.1954	53.0751
KIYYFAAV	48.1229	48.1423	45.9815	45.9815
VISTITNNI	45.8781	41.8619	42.3974	45.8781
IIQNFVQI	46.2757	45.9199	45.908	46.2757
VIQVFQQL	51.225	51.5974	51.7726	51.225
IIYNPKNL	41.2043	41.9521	42.7369	42.7369
KSVINTTLV	45.8817	48.2242	48.0653	45.8817
NGYKYMAL	45.6488	44.9671	44.1385	44.9671
NANTNTEVL	47.1764	47.1552	46.4768	47.1764
TSVQNVSQI	47.2801	47.9665	48.4748	47.2801
YSLPNAPTL	49.1804	49.716	49.6686	49.1804
AATFNPELI	60.1402	60.2377	58.8806	60.1402
VMKANNSVI	64.1082	4.42869	4.66301	64.1082
SSVLNLTEL	52.7704	53.548	53.8527	52.7704
SVISNIVLM	43.1413	43.6997	43.5654	43.1413
SQISNGSHM	46.9163	48.9723	50.6809	46.9163
AGFAGDDAPR	21.6295	64.0064	64.2375	64.2375
NAFLFDHL	48.1315	45.9023	45.8567	45.9023
SSPATGKDTL	45.0036	45.0644	45.0268	45.0036
AGPWYRNL	45.2498	45.0986	45.0402	45.0402
FVQNQEVL	61.4019	61.3104	61.2974	61.4019
AAMKNVTEL	49.8781	52.6591	53.0296	52.6591
VALSNMNVI	50.573	48.6028	50.0164	50.0164
FGVLNVQTV	49.9251	50.7269	51.5869	49.9251
ISPFNKSAL	41.0086	40.9949	41.0203	41.0086
ILIVYENL	40.8885	40.8922	40.9796	40.9796
ITELFAVAL	40.8978	40.9504	40.9189	40.9504
TVIIYVRL	45.2381	42.3032	42.2794	42.2794
VSVENGMII	42.9648	42.9675	42.9682	42.9648
RVMESLGGL	54.1966	54.1501	53.8357	53.8357
LGYLHDFL	61.9028	61.3323	61.2239	61.9028
KVQEYPTL	41.3305	40.9622	40.9247	40.9622
ASYVNLPTI	42.1721	41.5109	42.8326	41.5109
VNIQYEVI	54.053	51.5771	50.8123	51.5771
VNIEFKDL	48.6108	51.5432	50.8022	51.5432
VNIQYLDL	65.0424	2.21996	42.236	42.236
SAPYGRITL	46.5642	45.9702	46.1747	46.1747
VAIRFDSGL	49.0211	48.9188	48.6672	48.9188
KSISNTSKL	20.2587	63.5463	47.3532	47.3532
KILTFDQL	44.6406	44.9538	44.766	44.9538
AALVSRTFL	49.04	49.0013	48.9953	49.0013
STFVYNTM	45.339	45.1485	45.1902	45.1902
GAVYNLENV	53.2543	53.1466	14.6935	53.2543
SGLQNFEAL	51.0693	50.6527	50.6727	50.6527
ASRANPYSI	45.1401	44.9687	44.6325	44.9687
EVVDFEKL	40.7739	40.735	40.843	40.7739
YAIVGLETI	49.7025	49.8486	50.3694	49.8486
KNYVLQTL	41.7668	35.2113	24.4824	41.7668
LFPSFVRL	39.1152	40.576	41.3407	41.3407
SYNDFGNY	47.7491	48.5145	47.7533	47.7533
ASPEGQDYL	46.8416	47.5978	47.9658	47.9658
SMGVNDIDI	50.4791	51.6333	51.099	51.099
SGNFNVDNI	48.1032	48.445	48.0478	48.0478
TIGFNVETV	54.0336	53.5874	45.6888	54.0336
QSIEFSRL	47.2773	49.6713	49.9256	49.9256
VIQDFVKM	40.9457	40.8404	40.8401	40.8404
ISLHNPVSI	43.7565	42.8369	18.3572	43.7565
FKFSLPQL	42.9593	42.9675	42.957	42.9593
RQFGFIVL	42.9617	42.9675	42.9641	42.9617
LHLTNLGVL	41.0122	40.9737	40.9478	41.0122
LSHINVALI	41.0101	40.9928	40.9355	41.0101
PPSPSRLLL	45.1335	45.0715	45.0267	45.0267
KVLVFNFL	48.847	48.8727	48.8678	48.8678
AAMSNPRAM	10.3048	44.3286	44.3395	44.3395
SAIMDSDLL	52.0412	52.0651	52.1728	52.1728
MSFQFAHL	33.1935	61.0529	5.70692	61.0529
SSSTGKDWI	52.2548	49.1382	46.8659	49.1382
SNIQYRSL	49.8093	51.2163	52.1399	49.8093
SALTLFSEL	48.1005	45.4082	45.034	45.034
GSVSNIYKL	42.966	42.9675	42.9662	42.966
GTINNLIHV	42.9583	42.9675	42.9461	42.9461
SAIHILDVL	42.9597	42.9675	42.9593	42.9597
EAPEFIEM	64.1617	51.5161	50.1568	50.1568
ASLVSQDYV	9.80395	53.3079	53.0751	53.0751
ASLSYDGRL	48.8006	48.5142	48.3156	48.3156
LQFQFAEV	49.5521	49.0046	49.4388	49.5521
SGPINFTVF	40.9723	40.9388	40.9413	40.9723
SLMVFQQL	48.2597	48.316	48.3416	48.3416
IAYAFFHL	53.0273	53.0593	53.0812	53.0593
AALENTHLL	48.89	49.3005	51.606	51.606
YGVLFRNL	45.2228	45.2615	45.4505	45.2615
AAPDVVVPTL	43.7421	42.9612	43.0056	43.7421
VIFEMTNL	64.132	64.3191	64.0825	64.3191
IMYNVTEL	45.3292	43.0944	43.1318	43.1318
FAFESVVAI	44.5799	44.3769	43.5658	43.5658
SSVRGNHII	48.2255	50.5622	50.0816	50.5622
VTYLFVQL	53.0685	53.0328	53.0447	53.0447
TSLRFVFL	43.3294	42.9901	43.7154	43.3294
TGPPNTSYM	44.1181	48.0645	48.5037	48.5037
SSEINSAYL	41.0189	40.8938	40.8537	41.0189
INFDFNTI	51.1703	51.3331	50.7959	51.1703
SAHSNINQI	51.5425	51.5089	51.499	51.499
FSPTNPAHL	40.9334	40.9746	40.9936	40.9334
SVPGNPHYL	7.45328	61.7252	61.0216	61.7252
IITTFEMI	69.3379	68.6445	67.4794	69.3379
VFYQVQSL	45.1056	44.7543	45.1289	45.1056
SIVFNGPHL	47.9218	47.5026	47.517	47.9218
IAPEDQVVL	40.8943	40.8533	40.8221	40.8533
SSLHNSLLL	47.6581	47.6156	45.0854	45.0854
KGIYYVQL	40.8176	40.8469	40.8446	40.8176
LSYKKTML	46.9128	45.1295	46.4063	46.4063
GQFNQDYL	44.6553	43.9767	43.3114	43.3114
GGITNFDNF	53.957	55.8871	54.009	54.009
SSPTSTEYI	41.0866	40.7631	24.9189	40.7631
SSPYSPAYL	40.7127	40.732	40.9412	40.732
SMGISFDVI	44.7842	45.4758	45.1942	44.7842
KNYDFAQV	60.0738	60.2053	60.2466	60.2466
YGVSNFKIG	31.7726	48.0796	48.0502	48.0502
SSMRYVLL	45.0031	44.9845	43.8511	44.9845
TSLKYMLL	52.3456	48.0821	47.903	47.903
VQPRATEAL	52.5571	51.8118	50.8989	51.8118
VINELIGNL	40.8143	40.7031	40.9308	40.8143
SIYVYKVL	53.7496	53.0481	52.9605	53.7496
IVVNLTGRL	40.8354	41.1956	41.0972	41.0972
ISPNFNFM	44.2577	45.005	44.7122	44.2577
SNYRFEGL	49.3351	51.5368	51.7079	51.7079
SAFTRVASM	56.1064	56.0719	53.8946	56.0719
TLYEYSPL	61.1563	61.1251	61.1803	61.1251
SSPTDKHTL	42.96	42.9675	42.9603	42.96
TLYNFSQL	42.5325	41.1787	40.9356	42.5325
VSPAHQYAL	56.1967	10.5731	55.8523	55.8523
LASHLNLAM	42.4765	45.2355	45.2565	45.2565
SHLLNTSTL	42.9652	42.9675	42.9686	42.9652
SNYLFTKL	48.7955	51.353	51.8395	51.8395
AMAPRTLLL	41.2895	41.6181	41.6045	41.6181
TALENLIVL	52.9913	52.9711	52.9657	52.9657
VFRLLPQL	48.999	48.968	48.9316	48.999
FSGSNAEQM	45.0557	45.112	45.0863	45.0557
RALENPDTA	56.1677	51.2061	50.9414	56.1677
VTPEGYAHL	61.3423	61.89	61.2803	61.89
SQIVNPESI	45.3364	45.2299	45.1246	45.1246
EIISFQHL	46.5734	47.8789	47.1253	47.8789
KALINADEL	51.7478	53.7347	54.1652	53.7347
STIVYYKL	44.3486	44.4041	44.5804	44.5804
ISILYHQL	48.1381	48.8625	47.4162	47.4162
AWIKVEQL	47.3675	47.2206	46.9662	47.2206
SSVLNQLLL	43.3623	45.0142	44.8404	45.0142
SAYEFYHA	65.1075	64.9469	4.03862	64.9469
TNYTFENV	42.981	42.9675	42.9534	42.9534
MAGINTDHL	18.7521	44.3295	44.4583	44.4583
TTVTTTSYN	68.7213	46.2713	8.53015	46.2713
AALENPMLL	49.2304	50.4777	49.954	49.954
LAGNEQVTR	61.1634	59.6033	58	59.6033
SNYLHRVV	49.6175	51.4535	50.9475	51.4535
RAIELATTL	51.7358	22.1315	25.8382	51.7358
VQYVLPRL	47.901	47.3537	45.4577	47.3537
IVNDFAYM	44.6343	43.871	41.436	44.6343
GNLGNTHYL	64.1026	64.2413	51.6243	64.2413
SAIINEDNL	52.8303	53.1555	53.5977	53.1555
ISLDYQHL	48.9979	48.9906	49.0082	48.9906
ISLDYHQL	51.1315	51.3912	51.2727	51.1315
ITYVHNEL	40.8157	40.804	41.4992	40.8157
SNYVFVFL	51.7789	53.8753	54.136	53.8753
SALEDLEVL	45.4545	64.284	30.1262	45.4545
AVLTNQETI	48.6973	48.7497	48.7487	48.7497
SSPKDLTQL	46.2378	48.2718	48.9405	48.9405
AQSINITEL	48.9427	48.7042	48.4248	48.7042
RALSNLESV	53.2194	53.1705	24.2806	53.1705
STIRNADVI	53.0536	53.0854	53.068	53.0536
SRVTNGELL	40.7989	40.8309	40.9559	40.7989
RTNEKVEL	49.0332	50.5536	51.1617	50.5536
GSLVHISYL	45.1925	44.999	45.2006	45.1925
VIYNPRNL	43.9818	43.5358	44.6716	44.6716
KSIKNANTI	41.1093	41.3689	41.4219	41.4219
LNLAFIANL	41.773	1.65354	42.631	41.773
AAPISPWTM	51.379	51.0853	48.2592	51.0853
VTGPGELWM	41.3054	40.94	40.7273	40.7273
AALHNGFYP	40.9773	41.017	40.8359	40.8359
QSITNLSNL	64.3167	64.3825	64.1175	64.1175
IVGINLTEM	50.7874	49.0339	47.9233	47.9233
RALELGTVM	45.063	45.1846	45.2118	45.2118
KSPQFRNI	61.0511	64.1657	41.4963	61.0511
TGIRLTESL	41.2928	41.3698	41.2636	41.2636
KFIVLQEL	42.9632	42.9675	42.9664	42.9632
SIIAMKTLL	23.448	40.8679	40.9042	40.9042
IVLTFRQL	45.8807	46.0112	48.1557	46.0112
THENLTYL	42.9604	42.9675	42.9612	42.9604
SNPEFRQL	46.0065	45.2813	44.6306	46.0065
TQAISQETL	52.2019	52.1965	52.1038	52.1038
SAPVNGSVFI	42.9611	42.9675	42.957	42.957
IGYARNPSL	64.3452	53.135	36.2407	64.3452
RTLMNLGGL	21.1729	37.1605	64.2341	64.2341
LQYIFAHV	56.1877	56.2003	56.1784	56.1784
SAIIFETPL	48.1721	48.0328	45.5343	45.5343
KGVFNVEVV	46.6012	50.0088	49.9952	46.6012
VIVEFRDL	48.4383	51.3994	51.1142	48.4383
INDIFQKL	44.5268	43.9596	44.072	43.9596
AIITGFRNV	52.6863	52.7503	52.523	52.523
VQQAYRLL	42.9879	42.9675	42.9582	42.9582
SALALVNRF	42.2991	41.8158	42.2708	42.2991
DPAIYFKEQFLD	65.2732	445.522	226.912	65.2732
SGPDLSTALM	49.9839	48.8841	50.4428	50.4428
GMVVDVENL	49.4083	50.9532	53.0024	53.0024
FGYEYITV	45.1056	44.9451	45.0287	45.0287
GSIYNPEVL	52.2619	52.1334	49.9206	49.9206
AMLTNLESL	54.0382	46.9096	51.8121	51.8121
SALNNFQVV	37.6359	51.6936	51.7418	51.6936
SALRMADVI	55.8176	54.218	53.2826	53.2826
VNIPQHANV	42.988	42.9675	42.959	42.959
GSHTNIHLL	40.7567	40.8552	40.915	40.7567
SIYTPLANI	34.6414	26.1084	40.3292	40.3292
FAQEALTVL	42.1627	30.8344	39.4421	42.1627
TGMLIGLSAI	42.772	42.4547	42.5907	42.4547
ISLEFRNL	44.5754	46.2987	48.344	44.5754
VAVKNSGGFL	52.6993	52.327	52.7865	52.327
SVGMRLLSL	47.9299	47.6565	47.2927	47.9299
VLYVWAQL	41.2229	40.9367	40.862	40.862
VLVYFHTL	51.7605	51.9137	52.231	52.231
ALVSNLYVI	45.9435	24.9635	26.9331	45.9435
AGPSNFGTEL	42.4412	45.1878	45.1349	42.4412
TGIANIAWM	42.9815	42.9675	42.9572	42.9572
RSPVYSHF	42.9667	42.9675	42.9681	42.9667
RQSTYQPL	42.9587	42.9675	42.9461	42.9461
RASTNAMLI	48.2661	49.0761	49.1799	48.2661
FGIIDVTEV	43.6941	43.7537	43.7112	43.7112
VFREVETL	85.3915	68.5717	68.2926	68.2926
INLNYKDL	47.0318	46.1335	46.3732	46.3732
RNQVYSLL	52.1538	49.2022	49.4221	49.2022
TGAKNLYII	45.1667	44.8188	44.9212	44.8188
YGLKNLTAL	48.4871	51.6094	52.0605	51.6094
YAPVGILFL	42.4959	45.1643	45.0698	45.1643
VIQVHLNGL	45.4733	44.1057	43.9954	45.4733
KTYLVKQI	48.875	48.6007	48.8801	48.8801
IRTLYLTL	48.4505	48.2196	48.9197	48.9197
RTLIYITL	48.4505	48.2196	48.9197	48.9197
GMIENGPFL	46.6826	47.311	47.9823	47.311
AGIYNLDDL	59.9381	64.0554	64.1883	64.1883
SGPTIQDYL	42.966	42.9675	42.9685	42.966
ELGTMTQTL	42.9673	42.9675	42.9677	42.9673
MGILNTDTL	48.2723	45.8854	23.7737	45.8854
MPGVNIAYL	49.1003	49.0294	49.2057	49.1003
NNPKFNFL	51.8026	48.8014	46.1592	51.8026
SVQMFPRL	61.8827	61.7143	63.8897	61.7143
QEVTYIQL	41.247	41.153	41.0723	41.0723
SAVVDKDFL	64.0827	61.4369	61.6821	61.6821
EIQYLTNL	50.1474	50.8749	49.7412	50.1474
ENLTYLQL	42.1377	41.5117	41.2585	42.1377
GMLRSLSTL	64.8981	64.9885	65.0429	65.0429
INFDFPKL	48.9311	49.7665	51.7016	51.7016
YNLNFPLL	42.9647	42.9675	42.9684	42.9675
RVLIFSQM	48.2415	49.1335	49.2395	49.2395
AVLSFSTRL	47.81	51.4243	51.2236	51.2236
KNLMFLVL	42.5136	42.7777	44.9453	44.9453
LIRDHINL	46.3342	48.4442	48.4234	46.3342
SLMPAAEEM	49.0925	52.3771	50.6571	50.6571
SMVLNSQSL	43.7753	50.0036	50.1787	50.1787
AMFNIRNI	44.9211	44.9082	12.5535	44.9211
INYTNEKL	41.8813	11.8864	7.56309	41.8813
ANTTNLTFL	41.9123	64.1644	30.9404	41.9123
LGPYPYATL	60.9928	64.2569	64.2061	60.9928
EHLQLQNL	48.8556	49.6134	51.525	51.525
SAPQTLHQI	41.0242	41.0156	41.0179	41.0179
YSLTLVDAL	51.6353	61.9177	64.1282	51.6353
IGYPFLVSV	48.9501	49.1554	48.4688	48.4688
QAVLNLHSI	42.9657	42.9675	42.9686	42.9657
RILEFFGL	49.586	35.9127	15.9638	49.586
RAFLFNKV	45.4532	45.3421	44.8205	44.8205
AIVEHLVTL	42.4897	42.7281	42.2712	42.2712
TSTTNPEFV	42.9597	42.9675	42.9516	42.9516
FQQEFPSL	45.2395	45.1149	45.2609	45.2609
VADGFISRM	41.2834	49.1122	49.1656	49.1122
SAPTARVFM	47.2006	47.2214	47.2641	47.2006
STISNDVFI	50.3913	49.4364	49.8752	49.8752
SAISNLDYI	57.2631	57.3369	54.0125	57.2631
SAVLIQGHGL	46.7705	47.5648	48.9694	46.7705
TQFLYPKV	43.8376	43.6148	44.2319	44.2319
KVVNPYYL	64.7851	62.7947	29.7448	64.7851
SQYLFPKL	50.9324	51.7006	51.0588	51.7006
TLMKFVQL	42.9668	42.9675	42.968	42.9668
AVFQYRLV	45.2533	45.1118	45.0027	45.0027
RSLLLLAPL	47.6067	48.4381	48.603	48.603
FQAMNKEL	45.161	44.5783	44.7944	44.7944
ILMTFENL	49.0634	49.1702	49.358	49.358
FALYNAANL	41.3009	41.1476	41.0844	41.0844
IENLSGARH	3.1056	32.1308	42.0508	42.0508
INLFFTEL	43.7797	44.4514	44.6897	44.6897
AQPVNVQQL	47.2296	47.1438	0.118371	47.2296
RVIDFFTV	47.0479	48.8378	48.917	48.8378
QALKYFNL	48.4787	47.6439	47.7933	48.4787
GMGFGLERM	27.1498	24.6494	41.0474	41.0474
LSFMYAHL	41.879	45.0506	44.9819	44.9819
NSPRNLAMEATYI	44.3359	44.6454	44.1183	44.3359
SLLTNADYT	47.5771	47.5756	47.5835	47.5835
TAVVNVTYM	53.8456	54.4554	56.16	54.4554
AASYYAPVR	69.7255	69.3537	69.3533	69.3533
STLIYRNM	47.8846	52.7787	51.066	52.7787
SALFFHYL	52.0596	52.1327	53.0854	53.0854
SSLFFLQGV	61.1233	64.0736	6.48265	64.0736
SFFVNGLTL	45.3381	45.6322	42.9921	45.6322
SKYDFPKL	51.0247	49.6476	46.8915	51.0247
VSQYYPKL	43.255	43.148	45.0098	45.0098
SYLMKDKL	45.3255	49.0115	49.0519	45.3255
IVLTFEYL	47.3225	47.477	47.9684	47.9684
SAIANIPAAAV	45.3887	46.8007	47.9332	46.8007
SLLTNHVTL	45.7241	48.8723	48.7814	45.7241
AQYKYIVI	40.9353	40.938	40.9492	40.9492
LPWLEARI	44.1471	43.5355	43.263	43.263
SSFSWTNGL	42.9609	42.9675	42.9626	42.9609
QPYEFTTL	45.2551	45.076	45.0003	45.0003
ISAVVMSYL	49.0991	48.3735	46.436	48.3735
ISFEFRSL	50.2154	52.2025	51.7704	52.2025
VQVPNLESL	48.6666	49.7047	49.3812	48.6666
VTYVYQLI	51.0975	51.0993	51.1979	51.0993
QAPQNKITV	45.8834	45.872	45.867	45.8834
LALVNDQLL	53.0348	51.7456	50.0962	50.0962
SAPSAGSLYM	42.9618	42.9675	42.9554	42.9554
SDIRFTNM	30.8661	64.1113	64.2543	64.2543
YAPSYYHV	37.796	64.0251	63.7311	63.7311
SSPSSSPTHL	64.0978	47.1803	45.2238	45.2238
GSDGSVGPVGPA	42.9671	42.9675	42.9678	42.9671
QNVAYEYL	45.9003	45.356	44.5844	44.5844
YAVTGDVKM	45.9522	45.3409	45.2224	45.9522
INYSYINL	51.5203	52.8247	53.0902	53.0902
ASFFNISTL	40.4381	40.8657	40.9405	40.9405
NALENINVI	48.2512	48.225	45.8437	48.225
GQVINLDQL	48.3087	48.9496	64.0211	48.9496
AAAAASSPAGLL	51.9628	51.7323	52.0746	51.9628
AALQNLEQL	52.8986	52.4624	53.1725	52.8986
IGLAYVNHL	50.3511	50.7064	50.681	50.681
VSIQNLVKV	42.966	42.9675	42.9569	42.9569
RGFEFTLM	46.7369	46.0505	47.6748	46.7369
VGYRYETL	52.2489	51.8243	52.7257	51.8243
SGIHLTIEM	15.9864	41.7061	41.4299	41.7061
AALQNLEEL	61.038	61.0863	61.1725	61.038
SSIEHLTTL	41.3162	41.3086	41.1672	41.3162
ASVLNTDPAL	42.9812	42.9675	42.9546	42.9546
GAVKNAQEAL	41.0374	34.5252	36.3264	41.0374
SLYRFTTI	48.3182	45.8646	37.5566	45.8646
SLEGPAWKI	64.8845	64.9	64.9581	64.9581
VMYKFLTV	47.0129	48.4149	48.9761	48.4149
SVAVGPLGSTI	42.9667	42.9675	42.9681	42.9667
SAVKNLQQL	47.5025	51.801	52.8367	52.8367
VLSIGDGIAR	43.3726	57.9115	64.1966	43.3726
VVFFFKTL	48.0554	48.2249	48.0794	48.0554
AAVLNPRFL	47.7112	48.0238	48.8526	47.7112
VTLANKELL	37.7871	45.8795	48.2272	48.2272
EAPDYMYL	41.334	40.8321	26.6836	40.8321
WFGMFANL	45.6031	45.3703	45.1736	45.1736
FAHFNSHAA	41.8096	53.8992	67.7857	53.8992
SSPTHTATSI	44.6035	45.1526	45.1675	44.6035
SSYINASFI	42.9674	42.9675	42.9676	42.9674
SSYNYIRV	44.76	44.5251	43.8237	44.76
QAPINAQML	47.9292	48.2678	48.1476	47.9292
QNHVFPLF	49.7167	37.0264	48.8629	48.8629
AAVNNVEATL	64.0808	30.8767	22.4089	64.0808
SAPVAAEPFL	45.084	44.1821	44.6871	44.6871
SALANYIHL	54.5058	55.1899	54.102	54.102
ATIINEEVL	50.6548	50.8473	51.4573	50.6548
KIIGNTENL	42.0219	47.2221	46.5498	46.5498
GMIINVLEL	50.5284	46.1979	46.3613	50.5284
VAPRYVALL	44.8063	45.0798	45.0589	45.0589
SAFAFMESL	48.2547	48.2558	48.0226	48.0226
QAVHNGTYI	44.9272	44.9125	44.9246	44.9125
LSGLNQEEL	56.1	59.4516	61.8631	56.1
GANVNAKDTL	37.8844	59.8876	59.9314	37.8844
IGPFNNIDI	45.1383	44.987	45.0217	44.987
RALSNLESI	51.8393	51.2294	51.9122	51.8393
TTLRNGEVL	50.0067	45.7784	46.3088	50.0067
SVNKNLQSL	49.2559	64.1504	64.1926	49.2559
TGPFNLQLI	45.9217	45.4289	45.0145	45.0145
RMVIINQL	56.2909	49.2268	50.2883	49.2268
SQLQSLTLI	42.9808	42.9675	42.9567	42.9567
LQDAEEAVE	40.7223	40.8384	40.887	40.7223
STYEYIDI	42.9592	42.9675	42.9543	42.9543
ASPEDRESL	48.5084	48.9057	46.8879	46.8879
RGYSFTTTA	51.0187	52.9876	53.0224	52.9876
SGPLEYPQL	45.6895	45.3841	44.545	44.545
SLLSNLDEI	44.2998	44.6071	44.3871	44.3871
VSVTNLEEL	53.0678	51.6497	52.0352	51.6497
AALPNIYEL	42.9644	42.9675	42.9679	42.9644
KTVVDIDTI	46.4554	45.884	45.8708	46.4554
QVVQFNRL	48.673	48.8029	48.4706	48.673
VMVSNVLLI	42.9597	42.9675	42.9518	42.9518
FGNLNKVVL	31.1336	40.6853	40.8872	40.6853
KAIGNAFAVL	45.5934	45.3664	44.8279	44.8279
STIRLLTSL	40.0076	40.3806	40.2993	40.2993
SQYVFTEM	52.1765	52.1303	52.3892	52.1765
SGVWNVTEL	38.6269	36.2032	23.6317	38.6269
GTNLNPEFI	42.9672	42.9675	42.9677	42.9672
TAPVPGQTPH	40.0289	27.8299	40.6303	40.6303
VIGRNGEMI	53.2338	53.1752	53.0058	53.1752
TAYLFSRF	42.7463	43.0894	43.0491	43.0491
INTTNIDTL	25.1739	41.8264	41.8627	41.8627
AAMLLQQVM	31.0882	51.9178	45.2219	45.2219
KTVTNLISE	43.1442	44.2561	44.9478	44.9478
SLITNKVVM	46.4741	46.3357	46.6968	46.6968
TTVTNPEPM	53.8974	53.9046	53.888	53.9046
YTKPYYGN	44.9043	44.977	44.957	44.9043
LNHQFVTM	43.1992	44.7429	45.9	45.9
FSSGASSHLL	50.5997	50.1636	49.7651	50.5997
GNIQNTVML	42.9812	42.9675	42.9544	42.9544
TSSVNKEQL	51.6202	53.7909	56.3727	53.7909
ELTPAFSQL	52.9029	52.9377	52.9549	52.9549
VNDIFERI	40.5703	40.8558	40.7403	40.7403
SALAFGQGLAA	45.3898	45.4475	47.639	45.4475
GHLTNLTHL	51.3334	51.5841	51.9893	51.9893
SALINLVEF	53.1075	53.1423	53.0654	53.1423
AALTLLEKM	48.2076	48.2372	48.0522	48.0522
KANVNLAYL	42.9669	42.9675	42.9576	42.9675
LNIVYRDL	43.0819	45.1235	45.1216	45.1216
SAVENLNEM	44.7593	44.6764	44.6423	44.6423
VNVYYTTM	42.6769	45.0102	45.0728	42.6769
SQSPGREVM	49.1843	49.1599	49.2621	49.1843
LGMSNVQEL	45.248	52.107	52.8834	52.107
SVVTFSVHM	56.973	56.8747	56.8541	56.8541
KIGYNPDTV	41.3568	43.5644	64.4836	64.4836
VINENFGTL	48.0772	46.1146	46.1782	46.1782
KATTNIVEM	41.1931	41.1534	41.1582	41.1582
VSLQNLSMV	40.9722	40.9896	41.0264	40.9722
GVHINAGPEI	42.9879	42.9675	42.9475	42.9475
ISFKFDHL	47.4102	50.5754	48.9234	50.5754
VTYIFNHL	48.7512	48.8865	48.8943	48.7512
VSIQFYHL	52.3466	54.3632	55.4513	54.3632
EIVTFERL	44.5597	45.8876	45.7776	44.5597
SNITFVVNL	46.1811	46.2364	45.8464	45.8464
SALVNYRAL	46.0219	45.8801	45.8635	46.0219
GGVVNMYHM	56.14	49.4434	51.5288	51.5288
ISPTHPGEGL	52.986	52.8846	52.8285	52.8846
STIMNLLSL	45.594	45.1011	44.945	45.1011
GNVSNIYKL	45.3517	45.475	45.8675	45.3517
INFAVFPSL	49.2283	63.8749	28.9818	49.2283
VMYRVIQV	64.0381	64.1297	64.0863	64.0863
STLINSLFL	50.9447	50.2339	50.2278	50.2278
SLPTNLIHL	47.4756	48.3156	48.0785	47.4756
QNYEMPNL	48.1119	45.1526	45.1176	45.1176
MAPQNLSTF	50.4169	49.7545	50.1822	50.4169
RSGQNNSVF	41.9112	41.576	40.761	40.761
TGNFQVTEL	50.0706	52.0378	52.137	50.0706
YGIVNENSL	47.3109	46.5949	43.7926	46.5949
SSLENAFQI	18.872	44.5967	49.9017	49.9017
TSVVLLTEM	42.9592	42.9675	42.9567	42.9592
SQLQGYTVL	40.7166	42.1741	44.3002	40.7166
VIYEPFQL	49.2928	49.5004	46.7777	49.2928
GVHVNQELL	45.1987	50.7248	51.1106	50.7248
LSPINHNTL	45.3845	45.3722	45.5133	45.5133
IERYFPAL	48.8138	45.9091	44.4602	48.8138
AVLEVVHEL	25.3623	41.8269	41.7783	41.7783
PVAVAGAPITL	46.9128	47.0908	48.902	47.0908
AVPGALGPLTL	47.9893	49	48.9493	49
YQNINSTGL	52.3055	52.2094	25.6294	52.2094
TEYVFTHL	44.4423	44.3525	43.4994	43.4994
INTWFTDL	56.2322	53.158	52.9402	52.9402
ESFPGFVNL	43.1128	43.3828	43.91	43.91
FSPFNPTSL	46.1931	45.2132	45.1792	46.1931
VDVTNTTFL	41.5532	41.7795	42.3182	42.3182
ISPENHISL	47.8229	50.5519	48.9557	50.5519
AAIENIEHL	45.0715	44.9084	44.7948	44.7948
YGLTNNSKL	43.9019	43.9698	43.7564	43.9019
ISPFNFTAI	49.1907	49.0052	48.9954	48.9954
SSVVGVWYL	41.7148	15.3286	41.8275	41.7148
AAFPGASLYL	42.9628	42.9675	42.9659	42.9628
KMVEINFL	41.2727	41.1303	41.0857	41.0857
VTVLNVDHL	52.8728	52.7294	52.6464	52.7294
VNVPFHLAL	44.8918	18.942	0.0169571	44.8918
VTLNTLHVI	57.654	0.00103878	259.786	57.654
LIYKFLNV	48.6167	51.469	52.5178	51.469
VAPVLIREI	44.4781	45.2405	46.7718	46.7718
IGPLKLAALN	44.023	43.9956	44.6503	44.6503
GGVGFGGLEAM	45.3732	46.0159	47.9648	45.3732
FTTQGQSEL	41.2458	40.7523	41.3604	40.7523
YALSDLDTL	48.6431	48.1823	47.6326	48.6431
SLVHHMTGL	53.0307	53.0172	53.0061	53.0061
SALHNDLQI	44.8792	44.8924	45.5343	44.8924
ASARNLEHL	45.8708	45.8588	45.8588	45.8708
VIYIFTVR	39.7784	63.826	64.0396	64.0396
LSPINIQLL	47.1815	48.9152	48.9271	47.1815
AAMGTQGNVM	48.648	50.4838	51.9588	48.648
TISSNLTEM	41.0449	41.0093	40.9892	40.9892
LLEGEDAHLTQYK	40.9315	40.9137	40.9001	40.9315
NFLVYQNI	53.0402	52.6492	55.0575	53.0402
TAVPYFSNL	52.7741	52.3826	52.3738	52.3738
IIGINGDYF	41.9175	41.7351	42.661	41.9175
GSIINYMVV	41.037	41.2036	41.3017	41.037
AAVEFISKM	50.8078	52.417	51.2115	52.417
TAPQYYRL	45.7434	47.1358	48.5311	45.7434
VGIENIHVM	48.09	51.5715	52.1897	52.1897
AVVAFVMKM	39.8182	41.6073	42.5629	42.5629
SILSNIHEV	42.9751	42.9675	42.9631	42.9631
ISFKWAFL	48.0405	48.4187	45.0309	45.0309
KALTHLTDL	48.1015	48.0159	46.1986	46.1986
KSYLFQLL	51.3819	51.8815	52.3032	51.8815
VTFIYQKL	52.0097	51.6323	50.5606	52.0097
RATSNVFAM	42.9639	42.9675	42.9673	42.9639
ASVEFLMTV	64.4	64.1224	2.51121	64.1224
SLLEYQML	42.9672	42.9675	42.9685	42.9672
SNQQYFLL	52.917	52.2361	52.2159	52.2159
SSLSNPPPTI	51.1586	53.2764	53.8452	53.2764
KQVTSAEHL	44.315	44.3481	45.1995	44.315
SQLISHQSI	37.6268	26.9934	25.3053	37.6268
GAVKNLTYF	51.9994	51.9957	52.7788	51.9994
VAYRYEVL	49.3995	49.1043	49.1649	49.1649
GGNFGFGDSR	89.6116	46.3456	5.65588	46.3456
VRFTTGDAM	46.2413	45.0235	44.9191	44.9191
SQFAFESVV	42.9665	42.9675	42.9682	42.9665
FSQEYINL	45.186	44.7839	44.6747	44.7839
AQYSLPTSF	41.8743	41.9074	41.6882	41.6882
TSVSNFLVM	54.0014	36.754	38.2261	38.2261
GNIRYYEV	41.6582	40.14	40.6164	40.6164
RAVIGSTYM	53.0585	51.7085	52.9378	53.0585
LSPENNQVL	49.0697	49.0601	49.0462	49.0462
QGVQNLQNL	45.3694	45.0654	48.0604	45.0654
RGYLYQTL	52.9137	50.1296	50.939	50.939
RTYSFLNL	52.8349	52.0677	50.113	50.113
ISYLYNKL	44.6927	45.0446	44.3985	44.6927
KGPENTLRV	44.9994	45.0175	45.0466	44.9994
AGILNHYLI	42.9647	42.9675	42.9681	42.9647
YIHINIGAL	40.8483	29.0467	5.96713	40.8483
ALLQNKDVI	49.3118	49.8176	50.9422	50.9422
AKLVNQEVL	50.1919	50.2848	50.358	50.2848
ALNEKLVNL	41.0696	41.0323	41.0019	41.0019
SAMVSIEYV	49.8374	49.2306	49.1348	49.1348
YLYEVSQL	52.9442	52.581	52.1483	52.1483
PAEVGCLVNL	45.2796	45.2446	45.0907	45.0907
RQGANINEI	42.4873	41.777	41.6732	41.6732
VNFLYMVL	44.5336	43.6482	45.6436	43.6482
RSYSFQKV	41.6908	26.8511	39.6451	39.6451
VALYNQGHI	42.9673	42.9675	42.9676	42.9673
TVPELTQQV	43.2233	43.8482	44.2652	43.2233
SAPQSAVELI	47.5141	49.9899	52.9183	47.5141
FGLTLTSYI	41.321	41.2577	41.3415	41.321
SSLDFYANV	64.8505	30.8632	41.815	41.815
VAYLMQKM	49.0628	48.5543	48.3621	48.5543
TSFMFQRV	48.5513	46.2325	45.9914	46.2325
SYVTTSTRT	22.7799	41.8796	42.1892	42.1892
KTLGSVTYM	55.3145	52.918	56.6453	56.6453
SQLQNQANL	45.856	47.984	47.9914	47.984
AQFVAETHI	49.1359	49.0407	49.1736	49.0407
KNFAFLEF	52.9786	52.9262	52.9357	52.9262
NTLNNIDVI	45.9288	46.1547	46.1808	46.1547
GALENAKAEI	53.2664	64.2465	3.00838	64.2465
FQVTHTVAL	43.2559	48.4093	44.958	43.2559
AIVPLEARM	49.0362	49.0108	48.9662	49.0108
RVSINTVNL	31.7833	31.5629	40.7565	40.7565
KQVLGQMVI	3.53151	20.4679	41.8808	41.8808
EVFDFRGM	42.9618	42.9675	42.9643	42.9618
SAPTLEDHF	48.7962	52.4044	50.9638	52.4044
AQVQNSEQL	46.4863	45.295	43.5594	45.295
EVIDFSHGL	53.0883	51.59	51.3995	51.59
GMLHLTESI	48.9364	48.9826	49.0084	48.9364
SAIQNLHSF	41.0249	40.9765	41.0074	41.0074
AFYYPSRL	52.1832	52.2107	52.2432	52.1832
SEPVTGLDAK	69.3632	69.922	69.7714	69.922
RVVANSEEI	48.9368	48.6595	48.6644	48.9368
SAVENKQQI	34.92	43.1342	43.8709	43.8709
RAVQDVESL	7.7865	34.2959	45.3384	45.3384
VTIMNPNVL	44.879	44.6668	44.6033	44.879
FAIQNPTLI	45.4207	44.4469	44.034	45.4207
IGYFYGQGL	44.4389	44.687	44.1934	44.1934
FAYRFSNL	48.969	48.2095	48.5033	48.5033
LGVTNFVHM	50.9678	52.7706	51.9791	52.7706
TVNLSENQL	51.4818	51.5338	50.2487	50.2487
NISNTVQQL	47.4941	47.1929	47.5091	47.4941
HSALIYSNL	46.7448	48.183	47.0327	47.0327
QALQNLALM	42.9666	42.9675	42.9682	42.9666
VRNAPGQYI	45.046	43.8481	43.298	43.8481
FNLVNNALL	40.7743	40.8442	40.8191	40.8442
QVIAGFNRL	49.448	48.7798	22.128	48.7798
TSLRILDLS	43.2699	45.1302	45.0578	45.1302
STLRLLTTI	45.9009	45.8989	45.9276	45.9276
FGYQFTQQ	49.2924	49.0519	48.6168	48.6168
TSPYHVDSL	48.6912	50.6159	51.759	50.6159
WAIENPAAF	52.7326	51.4394	50.7296	50.7296
TVNVQDTEL	49.3101	51.275	53.329	49.3101
SQLDLTDNL	60.1502	60.2192	60.1778	60.1502
YSLGSLEHL	41.6091	41.7673	41.6608	41.6091
VTLMNPNTL	51.128	49.7733	50.3933	50.3933
QTVLNPVTM	64.3366	58.4685	46.9916	46.9916
SVYKFFDL	45.0721	45.054	45.0618	45.0618
SILTNPRAM	49.262	49.2267	49.0827	49.0827
MGVAMLNGLI	53.6167	50.1233	48.4493	48.4493
SISASSGLIAL	55.9835	49.5515	48.9137	55.9835
SSIINKMLL	49.1809	48.4679	48.5403	48.5403
SIAAFIQRL	48.9064	48.6603	49.5186	49.5186
TPVISGGPYE	69.4403	69.8085	69.4451	69.4451
IGQARNTLM	48.1265	48.2637	45.8817	45.8817
VSPENIIFT	44.9609	44.509	43.9345	44.9609
VIEEFVNGL	63.9027	25.0516	69.9167	63.9027
AQYVSPELL	41.155	41.0925	41.1059	41.1059
YALALISRI	48.2507	48.1421	47.9019	48.1421
SQMGNLHAF	46.2294	48.6233	37.7866	48.6233
KTYTFDMV	52.9486	51.5279	52.2358	51.5279
TVMNNLSEL	47.8674	48.9116	48.9781	48.9116
NMVAKVDEV	50.3961	52.4641	52.0075	52.4641
KAMENIGEL	47.4751	49.0531	48.8811	48.8811
SQLVKADEM	48.9727	51.9676	52.77	52.77
STYKFFEV	47.9019	49.2918	49.5228	49.5228
AHPGPVNSEL	42.9815	42.9675	42.9573	42.9573
VVASLEQQF	42.9646	42.9675	42.968	42.9646
SLVTNMDKL	45.2168	44.3311	45.2061	44.3311
VRYINENL	47.4776	47.1343	47.3751	47.4776
VNVDHPINL	44.8281	44.9838	45.0531	44.8281
KTVENFVAL	45.0456	45.1025	45.2534	45.0456
EIKNLQYL	51.1941	65.3922	65.7035	51.1941
VITNFSARI	46.7696	51.2897	51.971	51.2897
VLVKWYNV	47.4373	44.7379	45.9192	44.7379
YGLLNVTKI	52.3228	51.8705	51.3359	51.8705
SSPVEQEVM	41.2799	41.2179	41.1119	41.1119
SNYQMHLL	45.1799	45.2482	45.0512	45.2482
QTFQHTML	45.3734	45.8759	48.0027	45.3734
SMEVNVDVL	53.0352	52.2908	53.1211	52.2908
ATLQEYPSI	53.7802	53.1253	53.1832	53.7802
NSTFNQVVL	47.5032	46.4056	44.9084	44.9084
FQNVNSVTL	51.7408	51.0991	52.4309	51.7408
AAPGNKTSYI	44.8327	44.8277	39.9652	44.8327
SWIEVQFL	49.4405	49.1562	49.0143	49.0143
FMVEKGPTL	44.1773	44.9023	48.1301	44.9023
VSHNHLTTL	49.2533	50.7148	48.5526	48.5526
SQLHSTVHL	44.9963	44.4242	44.3411	44.9963
VQYKFSHL	42.9808	42.9675	42.9521	42.9521
SLYANIDIL	48.0169	45.005	44.1188	45.005
AAITNKYQL	47.4475	50.2417	52.2049	52.2049
YAVRDTIAL	45.5289	46.3641	45.919	45.5289
VAVTFSERL	47.232	50.7914	50.862	50.862
AAPRSFIFL	49.3879	49.6519	50.6765	49.6519
FSVEGQENL	44.2812	43.6414	43.0984	44.2812
GVMTNKDEI	44.9791	44.9597	44.4877	44.4877
GQKENGNYI	43.6744	43.403	43.4341	43.4341
MSLENGTRV	49.5241	56.2353	46.1384	49.5241
LQYTFHDV	42.9621	42.9675	42.9464	42.9464
PRNFVENF	28.2531	28.0948	40.0722	40.0722
TALESLIEM	36.4882	36.5894	37.0294	37.0294
NPVENLTHV	64.2241	3.9283	41.8766	41.8766
FVARNSSEL	42.3515	41.2323	40.2384	42.3515
SALRAQETF	42.96	42.9675	42.9601	42.96
FTYGFFKI	41.1367	41.0558	40.9662	40.9662
KSVENFVSL	48.7401	49.4154	49.6135	48.7401
LRYEDTLL	48.1603	45.3676	45.1392	45.1392
SQNILATYL	47.7334	47.8988	49.1333	47.7334
YLAVDLSNK	61.4649	61.8243	61.8432	61.8432
STINTVLKM	50.3334	48.0711	48.203	50.3334
AALQKLEHL	45.1061	45.2458	45.1033	45.2458
SMEVNVDTL	53.0802	53.0202	51.6137	51.6137
SQFVDVDTL	49.8288	49.177	49.1994	49.1994
TMAYNITPL	52.0869	51.1747	51.8727	51.8727
ATIIIDTNY	45.8087	48.8122	51.2901	51.2901
SSLQNYAKI	44.1334	43.8034	44.6102	44.6102
SIQNGKYTL	48.1008	48.0553	46.0491	46.0491
TSLAFESRL	47.2616	51.0305	50.7357	51.0305
IQFDFQIL	44.4462	43.5204	43.2581	43.2581
YSFPNVALI	40.7922	40.7967	40.8091	40.8091
SRVPTFAFV	63.8836	63.9705	64.0458	63.9705
SLVNIVQHI	56.3602	56.327	54.4739	54.4739
AIIAFKTLM	45.7011	45.5733	44.1862	45.5733
NALHNIKTL	47.0032	52.0869	52.1336	47.0032
SMVRMQQL	42.961	42.9675	42.9628	42.961
KNQEYETL	45.6689	45.3074	45.3113	45.6689
STVENFSQL	48.843	48.7713	47.1363	47.1363
SGPQLFQTF	51.4843	51.6487	53.4899	53.4899
TVYPMERL	52.0069	52.9751	53.2454	53.2454
SGIRNISFM	48.5246	52.0581	52.6129	52.6129
VISDLFPSF	45.2069	45.4743	45.749	45.2069
SSLSFNTRL	48.944	48.9677	48.9914	48.9914
GLLNNPHFI	61.0898	61.2859	63.9378	61.0898
VSLLDIDHL	46.4238	46.5499	46.9585	46.9585
LAYLQIFR	42.9668	42.9675	42.968	42.9668
RAIPNNQVL	45.0096	44.1042	43.8342	45.0096
QNPNYYNL	45.3235	45.1852	45.0901	45.1852
NQPVNGSYF	42.0203	41.8764	29.6645	42.0203
YGYHFPEL	46.0458	45.3422	46.8551	45.3422
GTLENEYTV	52.4071	50.7079	50.3825	52.4071
VALGNMYEL	42.8583	44.8058	43.952	42.8583
SSPGPLPEEI	49.9669	49.5758	49.2548	49.9669
VNYEFGIAL	51.1163	50.9021	50.6273	50.9021
SVLFNLTTM	52.5686	51.145	50.0356	50.0356
FVYVFHTL	49.1879	51.3402	52.6099	52.6099
YSIINGIVF	49.7855	28.8702	38.754	49.7855
VGYRFVTAI	48.8801	48.6527	48.638	48.638
RSYLFLGGI	46.7999	45.4201	45.1884	45.1884
IIFVPVPQL	42.6572	41.8127	42.105	42.105
VALRNINLI	45.1753	45.2833	45.5805	45.1753
RIDEFESM	45.3803	46.0896	51.1763	45.3803
RIDEFEAM	53.36	52.686	51.3003	51.3003
YIYNHVAM	45.1275	45.1204	45.1001	45.1001
NALSNLFTM	49.0681	49.0587	48.9656	48.9656
GTMVNKTLM	42.6107	44.3183	44.0855	44.0855
SPPTNFNHL	37.7129	32.9466	48.054	48.054
SQLQAEHTL	48.1842	45.8591	34.9863	45.8591
SAIFNFQSL	51.1134	50.6566	50.1623	51.1134
KNLEGYVGF	41.8541	41.9048	41.7993	41.8541
GEYLFERL	41.0777	40.9814	40.9127	40.9814
AAPAPSLWTL	44.7497	46.582	47.7617	44.7497
SSVFNVEMV	41.64	20.5995	41.4763	41.64
AMMAKAEYL	47.5779	46.4843	45.881	45.881
YSPTGKEFV	44.3333	44.3155	44.1156	44.1156
KEFEFSQL	52.9375	52.0276	47.9845	52.0276
SASFNIIEF	35.2097	45.8739	48.039	48.039
SGPRDHVFI	52.2005	50.4209	49.8658	50.4209
MAYLFRNI	53.076	54.2866	35.7594	53.076
LQGRNPETL	46.0071	45.8896	45.8781	46.0071
KIPEYQHL	48.9916	49.067	49.1613	49.1613
NKVSPQELI	47.895	46.1165	45.9173	47.895
VNFEFPEF	52.4953	52.0392	51.5277	52.4953
GALKNTDYF	50.7698	52.2292	52.704	52.704
VQFIFDLM	49.7129	49.9704	49.7217	49.7217
TALRYYEL	48.1228	48.0944	48.2615	48.1228
SSGKNLFYL	46.0836	48.1971	48.0926	46.0836
IAARNQENL	64.0683	64.1276	64.0308	64.0308
YAPAPFLHI	51.222	51.0333	51.9949	51.0333
GVIILYDHV	40.8047	40.8369	40.8375	40.8375
GVILFHETL	40.8047	40.8369	40.8375	40.8375
FSPLNPVRV	44.1529	43.9968	44.158	44.1529
RGLENLTLL	45.1742	44.7538	45.0501	45.1742
SALQNVKRL	45.2323	44.3028	44.7826	45.2323
FSLTNGMYP	53.2617	50.8417	50.2652	50.8417
DVQLQESGPG	50.6176	52.001	52.7472	50.6176
ASYINPDHL	40.465	40.9627	41.004	41.004
SSPVFKAMF	48.1226	30.4286	31.8653	48.1226
SVVQNQQQV	44.3302	44.8557	44.8738	44.8557
AQIDHYLGL	21.5456	40.7692	25.4876	40.7692
TAIHFAEQL	10.3761	41.7338	41.927	41.7338
AAMVSKFFL	44.676	44.5656	45.0003	44.676
SQLLNLTQL	51.9924	51.0919	53.4455	51.9924
YNLDYTEL	43.2571	45.0074	44.0319	43.2571
SSPQNQEQI	42.9644	42.9675	42.9678	42.9644
FTFQFNNL	50.2575	51.0388	51.0049	51.0388
LTQQYHQL	49.6809	49.2565	49.1133	49.1133
STYLFRLM	47.9937	47.8966	49.0046	47.9937
VTVENVQEL	46.5936	46.32	51.2039	46.5936
RTVGNIEEL	44.5454	44.7516	44.4976	44.7516
GSLRNLEEL	44.5454	44.7467	44.2744	44.7467
SLGLNPYPGI	44.9164	44.9827	44.9701	44.9164
SALEFLTHL	48.9845	48.4848	46.6329	48.4848
RNPQFQKL	46.6904	47.816	48.6787	48.6787
RIAELTSQL	42.6198	41.929	42.5411	42.6198
SLVDLNTRL	40.6191	40.5526	40.385	40.6191
KSLENILTL	44.8548	47.3511	46.8343	46.8343
SQLELKSLI	45.3349	47.2162	46.746	45.3349
SAANYTNGSF	44.2907	44.9266	44.9709	44.2907
GMLSNMISF	42.9669	42.9675	42.9464	42.9464
YSLGNTYTL	48.914	48.4659	48.9929	48.4659
YSLPHPKSADTLAM	42.9656	42.9675	42.9687	42.9656
FAHTNIESL	48.6552	52.7436	53.4847	53.4847
SHVTNVDFL	49.586	51.8176	51.9222	51.8176
SAIVNLPGCSA	42.9655	42.9675	42.9471	42.9471
VNFTYQFL	52.3301	52.4042	51.8738	51.8738
RQILNADAM	42.9618	42.9675	42.9643	42.9618
TQSVNIEQL	64.1257	63.9906	64.1835	64.1257
VMIPNVETI	45.5833	44.8027	44.7855	44.8027
RQLENGTTL	49.6103	52.0155	52.9077	49.6103
AQYKFIYV	46.9589	48.3091	48.9653	48.9653
SNYKFFLL	50.6083	41.921	14.9921	50.6083
ISLKNSQEI	33.0577	45.8535	45.8965	45.8965
TQVSLKDQI	44.8117	44.3897	44.2953	44.2953
ATVGPLVVYL	45.2787	46.0414	46.2	45.2787
RISMVISLL	31.0929	40.775	40.8269	40.8269
NYEIMCMI	42.9666	42.9675	42.9682	42.9666
SSLEMTTTF	52.5596	53.0252	52.7891	52.7891
YNISNSSTF	56.2804	56.3893	56.1681	56.3893
FHLQNGAVM	38.3838	48.2354	48.0857	48.2354
KALDYYML	51.8156	50.7545	49.8917	50.7545
NGPQNIYNL	9.00114	30.6467	64.2321	64.2321
NGPEFEARI	40.9124	41.0152	41.0753	41.0152
RAFEFTYV	46.8433	45.068	45.4675	45.4675
ASIQNGKDSL	44.5818	40.9717	40.2107	40.2107
VSSRNVEEL	1.66869	63.4177	64.1646	64.1646
VTNLNPDFI	45.2494	46.628	48.0164	46.628
VALLNLENM	50.266	50.1533	50.0425	50.0425
ATLEKQETI	45.0164	45.1049	44.8829	45.0164
VSARVQMLI	47.7433	42.1961	43.109	47.7433
VSARNIMLL	45.0265	42.4031	43.1495	45.0265
VALINKDFL	48.6421	53.5471	53.0415	53.0415
VGIRNTFLL	52.5914	51.4629	44.1604	51.4629
SAFLIVRLN	69.5191	69.3944	69.4111	69.4111
LIGTFNVIR	54.8009	48.0924	49.8858	49.8858
ANYDFYQL	45.0925	45.0492	45.0174	45.0174
SQFEFTQF	44.8813	45.0355	45.0709	44.8813
VTFPYPYM	45.2239	45.1636	45.1782	45.1782
FTWEHSNL	45.1032	45.3043	45.6062	45.1032
ANFSFFTSL	43.0972	43.408	43.528	43.528
ELLMNADVI	42.9879	42.9675	42.9677	42.9675
SAIMNPASKV	25.0987	39.518	41.1496	41.1496
SNFHFAVLV	45.0814	44.991	44.9111	44.9111
SSVSNVNLTL	49.0603	48.1082	49.0796	48.1082
VGIENFELL	49.1009	49.0946	49.1006	49.0946
RNFVFHTL	44.6278	42.7154	41.0301	44.6278
VVVENITLM	44.9598	45.0626	45.1232	44.9598
GQVKNDLFL	50.181	49.8874	49.8813	50.181
FQALNAEKL	44.9408	45.3917	45.426	45.426
ITYYFDNV	42.4963	44.7154	49.4809	44.7154
STHTNGGLTF	42.967	42.9675	42.9679	42.967
FALNNPEMV	51.3029	50.9735	51.0422	51.3029
LGVSNFNHF	39.724	56.1816	56.254	56.254
SALGNQSGSTL	33.9251	40.4299	40.8273	40.8273
SQQQNFIVA	58.0958	63.8383	65.4103	65.4103
TATMNLDRI	40.9772	45.0947	45.0643	45.0947
INAEFVTQL	46.5422	44.9978	43.5659	46.5422
IFVSNIDNL	52.9666	53.0783	52.9954	52.9954
EGRAVYLNI	53.0518	52.9347	52.9503	53.0518
VNVRFSTIV	48.8097	48.6257	48.604	48.6257
QSIAFISRL	47.8591	50.5003	50.0379	50.0379
FGGHNEDFI	42.9155	42.2606	42.8973	42.2606
LDMAAFQSH	53.6342	52.6602	51.146	53.6342
ITYTYDLM	45.1338	44.9783	43.4381	45.1338
YAVGNHDFI	41.9685	43.5961	44.9076	44.9076
AFVKFNYM	52.7527	52.919	52.9981	52.7527
FGPTDKEEI	45.2634	45.0123	44.4802	45.0123
TAFNNLENL	52.1031	51.4785	50.9689	50.9689
ATLERLEGM	42.9659	42.9675	42.9685	42.9659
SQIRNMASL	40.4699	41.2974	40.7925	41.2974
KVFEYHNV	49.1451	49.1381	49.207	49.1451
LSLPNTDYI	52.0666	52.1695	52.1191	52.0666
GQGRNPFFL	41.8929	44.1205	42.8166	42.8166
KAYIHTRM	46.1177	43.8329	42.3852	46.1177
SGVSNFAQLI	53.0538	52.9446	53.1488	53.1488
VTPTFNIPF	45.759	43.9066	42.9614	42.9614
RSLYNVNGL	5.52347	64.5019	64.139	64.139
LFLQFGAQGSPFLK	64.248	61.7562	62.119	62.119
FALTLQETL	47.4042	49.2535	47.3581	47.4042
GLLQNLQHL	49.617	45.0805	39.9808	39.9808
IQGILIEHL	42.6368	42.9023	43.3239	43.3239
YAPEDTEVL	40.6672	40.6161	40.5782	40.6672
EAPESYKNV	42.9592	42.9675	42.9737	42.9737
FGATNWDLI	49.1609	49.5897	49.4537	49.4537
FVARNGPEF	52.4141	52.9778	52.345	52.9778
TWLTVNRM	37	42.9675	42.9602	42.9602
TAIENATVAF	56.2231	46.6955	53.9002	53.9002
SSPQHPASLL	47.6956	48.567	48.4867	47.6956
RSAENFTVL	45.3549	51.0617	51.2505	51.2505
FAPYNKPSL	48.7247	50.4719	51.5467	50.4719
KSVANLEYL	59.4374	62.6765	64.177	64.177
YIIGQKGSGI	61.8995	61.8973	61.323	61.323
SSINFLTRV	50.1968	52.6446	53.0546	50.1968
ASLSNRLYI	61.8499	63.8297	63.8581	63.8297
IQPINHTTL	43.2329	45.5565	48.3217	43.2329
LQHSPTILQ	47.3955	51.7723	52.3849	51.7723
SGITNSASSTL	41.0938	48.0967	49.3791	48.0967
VLEQEEYK	42.9661	42.9675	42.9685	42.9661
VQRMGFGNL	46.8192	48.9487	48.1542	48.9487
AALRDYETV	50.3247	46.5949	42.0151	46.5949
NVHINDNVL	55.8533	56.0525	55.8574	55.8574
IAHLNNENL	44.906	44.3423	44.5358	44.906
SAPRYMALL	46.6917	46.1737	48.2532	46.6917
IQMYDRVI	45.0643	44.7901	44.7709	44.7709
YGPLNLLTF	44.7074	43.6532	42.5833	42.5833
FNLVFERL	45.6963	48.1982	48.1386	45.6963
KTISLTDFL	46.7659	43.753	45.525	43.753
SSIQNQMQS	42.9652	42.9675	42.9686	42.9652
SIYMFFNT	52.9987	52.9905	53.0276	52.9905
SILAMINNM	53.0936	53.1113	52.2031	52.2031
EVFHFFNV	35.7525	49.0399	48.6272	49.0399
LSMRNTSVM	50.7579	52.5224	50.1879	50.1879
SQISNTEFL	53.3592	52.6183	53.2881	52.6183
FVTSNTQEL	43.162	50.9156	52.3963	43.162
ATVTGGAWYL	52.8948	52.9867	53.0418	53.0418
VFREVEML	48.5009	44.9911	44.8656	44.9911
ISMFNGQLL	42.9985	42.9675	42.9599	42.9599
TQGQNIQHL	64.3172	64.2204	47.3605	47.3605
SSLEFTELL	42.9617	42.9675	42.9678	42.9617
YINKISSTL	44.9137	44.7642	40.9816	44.7642
NQYKFILL	45.8829	43.1548	46.3462	46.3462
SMLSNPDLM	49.5526	56.2004	55.8792	49.5526
HSPTNTVHM	52.916	50.5709	51.3984	50.5709
SAPSYPMASL	47.5513	49.0517	49.1357	49.0517
AALLNFDEF	51.6083	51.7286	51.3634	51.6083
KQYPYNNL	44.5222	45.1148	45.5398	45.5398
VQYEMRTL	49.8502	29.7761	45.1028	45.1028
SLYDAFPKV	48.1265	48.5863	48.5441	48.5441
YTFVNPSVL	48.914	47.3452	47.3753	47.3452
KIFMFQLL	30.8741	38.28	37.2451	37.2451
KQTINPILL	44.9839	44.8321	44.8711	44.9839
TSPINPQHM	46.3418	47.9222	48.0451	46.3418
KAPTNEFYA	50.8593	52.652	52.5048	52.652
AFYYIHNL	45.122	44.2112	43.928	45.122
ISTEFLALM	41.168	56.4695	0.827267	41.168
TPLVEYYR	47.6984	45.5839	45.3255	45.5839
IQLMNTAHL	43.5911	45.0479	46.7068	43.5911
AMLTILHEI	41.62	18.2136	18.3916	41.62
VSYPHLVLL	42.9601	42.9675	42.946	42.946
GTTMYPGIAD	49.1962	49.1496	49.1371	49.1371
GSQGTNPHMI	28.0669	27.1849	40.7836	40.7836
FSVENFDAL	52.0439	52.2034	52.2456	52.2034
NGYLEFDAL	52.0602	52.2438	52.0176	52.2438
ATFEKESVM	45.8528	48.9511	48.9364	45.8528
LSNNNHTEI	45.2559	45.1656	45.1056	45.1056
FGPVNHEEL	48.087	53.0165	54.1373	54.1373
NQYQFDKV	52.3344	49.0851	48.2032	48.2032
YSPVGKEYV	45.0581	45.0559	45.0814	45.0814
TFYNELRV	48.2686	45.0787	45.0676	45.0676
IGFRFSSDL	40.7468	40.9088	44.9666	40.7468
RVYEFTRA	24.7397	64.2865	41.5773	41.5773
VLDLDLFRVDKGGD	68.064	68.1438	68.1702	68.1702
SIIVFYNSV	45.12	21.0044	42.5364	45.12
IFYGASIASL	41.8723	43.8579	44.8501	44.8501
LQYEFTKL	49.094	51.2089	51.6961	51.6961
IAVANAQELL	50.5639	49.658	48.3788	50.5639
VNVERVLNV	52.9957	53.0818	53.0886	53.0886
VAVRNLQEI	50.7879	53.0845	53.1289	53.1289
VSILNRQVL	47.5977	51.6883	51.685	51.6883
VTIRLLDVL	43.0014	43.2976	44.1706	43.2976
SMPRNTSYA	47.9767	48.2458	45.8614	47.9767
FGPVDHEEL	48.9983	51.6324	52.4289	51.6324
QAYQYEQI	52.9474	49.2921	45.3957	52.9474
AQYGKLESM	48.7241	44.2387	44.006	44.006
FFMPGFAPL	53.8864	53.0998	48.3893	53.8864
SSVLFETLM	53.0903	53.0594	53.038	53.0594
SSIQHTQEL	44.8472	45.0069	48.4123	44.8472
GQNPTNAEVL	40.7863	40.8697	40.8927	40.8927
TSPFSYKNV	45.1677	45.2859	45.2965	45.2859
KMATNTVYV	52.7915	52.9407	52.6973	52.6973
AMAEKVQHL	40.862	40.8948	40.9253	40.9253
RSVPNVEEL	45.4043	45.1647	45.0371	45.0371
FVHNNVISI	32.5768	64.2215	34.2093	64.2215
NQLALIEEL	64.1691	55.1388	31.6136	64.1691
SQVTLREPL	48.1237	48.0432	48.0769	48.0432
RVVDLITNL	40.2227	41.1036	41.9135	40.2227
TSFVNFTDI	43.4042	43.4464	43.1704	43.1704
SGPPPPPTFF	41.2277	41.1323	40.9531	40.9531
MSYLFRNI	45.8466	45.4246	45.7004	45.8466
YSFLNSSLL	48.1915	48.2567	48.0438	48.0438
AHINALEYI	42.9647	42.9675	42.9681	42.9647
GGLLGMPGVNI	25.8562	40.7222	40.652	40.7222
LVYKFMNL	49.0204	49.0772	49.1469	49.1469
KAILNGIDSI	43.6113	44.1915	43.9256	44.1915
TAPPNFNHM	40.8647	40.8074	40.7602	40.7602
VSTFMAEML	53.1417	53.0117	33.9126	53.1417
SPYVGLVYM	39.9496	40.8004	40.887	40.8004
SQQTYYRV	48.4657	47.3605	45.7087	45.7087
SSFSRVTNF	42.6305	44.3845	44.8389	44.3845
GTVMNGLSHL	63.5602	64.1539	28.635	64.1539
[truncated: 1,637 more rows]

## Sheet: H-2Db
H-2Db pMHCI - sequence	Length	Tm	Predcited BA [nM]	EL-score	EL_Rank	BA-score	BA_Rank	Binding strength category					H-2Db pMHCI - sequence	Length	Tm	Predcited BA [nM]	EL-score	EL_Rank	BA-score	BA_Rank
YAHINALEYI	10	54.5835	5.44	0.9131	0.0089	0.8435	0.0055	SB					YAHINALEYI	10	54.5835	5.44	0.9131	0.0089	0.8435	0.0055
YSLPNAGDVI	10	51.7292	13.45	0.9161	0.0086	0.7598	0.0084	SB					YSLPNAGDVI	10	51.7292	13.45	0.9161	0.0086	0.7598	0.0084
IGMFNLTFI	9	49.9245	7.29	0.85	0.0154	0.8164	0.0064	SB					IGMFNLTFI	9	49.9245	7.29	0.85	0.0154	0.8164	0.0064
SQIVDDDFI	9	43.6859	61.74	0.6628	0.0474	0.6189	0.0304	SB					SQIVDDDFI	9	43.6859	61.74	0.6628	0.0474	0.6189	0.0304
SAPMNVDNLIM	11	50.0161	11.69	0.9487	0.0052	0.7728	0.008	SB					SAPMNVDNLIM	11	50.0161	11.69	0.9487	0.0052	0.7728	0.008
YSPSNHHILL	10	46.4325	49.95	0.8935	0.0109	0.6385	0.0259	SB					YSPSNHHILL	10	46.4325	49.95	0.8935	0.0109	0.6385	0.0259
SAPMNVDNLIMIV	13	45.8393	55.58	0.3761	0.1964	0.6287	0.0281	SB					SAPMNVDNLIMIV	13	45.8393	55.58	0.3761	0.1964	0.6287	0.0281
FKLILAEYI	9	44.9761	501.25	0.2459	0.3678	0.4254	0.1882	SB					FKLILAEYI	9	44.9761	501.25	0.2459	0.3678	0.4254	0.1882
TGPVGQLWM	9	39.2427	1260.48	0.3573	0.2175	0.3402	0.3946	SB					TGPVGQLWM	9	39.2427	1260.48	0.3573	0.2175	0.3402	0.3946
YAPVSPIVI	9	52.1065	93.72	0.866	0.0137	0.5804	0.0407	SB					YAPVSPIVI	9	52.1065	93.72	0.866	0.0137	0.5804	0.0407
SAPMNVDNLI	10	52.2019	8.16	0.9345	0.0067	0.806	0.0068	SB					SAPMNVDNLI	10	52.2019	8.16	0.9345	0.0067	0.806	0.0068
NQMVNTVLI	9	50.1505	18.54	0.8764	0.0127	0.7302	0.0095	SB					NQMVNTVLI	9	50.1505	18.54	0.8764	0.0127	0.7302	0.0095
MMINPFMI	8	53.2033	1816.44	0.0777	1.3537	0.3064	0.5522	WB					MMINPFMI	8	53.2033	1816.44	0.0777	1.3537	0.3064	0.5522
SAPMNVDNLIMI	12	47.6529	18.39	0.6976	0.0412	0.7309	0.0094	SB					SAPMNVDNLIMI	12	47.6529	18.39	0.6976	0.0412	0.7309	0.0094
SAPMNVDNL	9	57.0005	4.2	0.9945	0.0006	0.8673	0.0047	SB					SAPMNVDNL	9	57.0005	4.2	0.9945	0.0006	0.8673	0.0047
FLMMNKDEL	9	48.2734	17.83	0.8783	0.0125	0.7337	0.0093	SB					FLMMNKDEL	9	48.2734	17.83	0.8783	0.0125	0.7337	0.0093
TMMINPFMI	9	48.0788	16.92	0.7694	0.0251	0.7386	0.0092	SB					TMMINPFMI	9	48.0788	16.92	0.7694	0.0251	0.7386	0.0092
GSPTNLEFI	9	51.1687	12.53	0.9575	0.0043	0.7664	0.0082	SB					GSPTNLEFI	9	51.1687	12.53	0.9575	0.0043	0.7664	0.0082
YGVSNFKIGM	10	50.8161	252.14	0.3486	0.2277	0.4889	0.0997	SB					YGVSNFKIGM	10	50.8161	252.14	0.3486	0.2277	0.4889	0.0997
APGSPTNLEFI	11	39.7841	43.75	0.8259	0.018	0.6508	0.0217	SB					APGSPTNLEFI	11	39.7841	43.75	0.8259	0.018	0.6508	0.0217
SAPFDSVFYL	10	50.9607	150.25	0.6309	0.055	0.5367	0.0624	SB					SAPFDSVFYL	10	50.9607	150.25	0.6309	0.055	0.5367	0.0624
NAVSNKYEL	9	48.7408	45.11	0.9034	0.0099	0.6479	0.0229	SB					NAVSNKYEL	9	48.7408	45.11	0.9034	0.0099	0.6479	0.0229
IAIVNYANL	9	50.1394	10.17	0.9451	0.0056	0.7856	0.0075	SB					IAIVNYANL	9	50.1394	10.17	0.9451	0.0056	0.7856	0.0075
SMYVIPDEL	9	50.5782	134.9	0.7474	0.0301	0.5467	0.0567	SB					SMYVIPDEL	9	50.5782	134.9	0.7474	0.0301	0.5467	0.0567
FMRTDMLQNM	10	53.5174	6154.84	0.0227	3.9552	0.1936	1.8097	WB					SQGTNPHMI	9	42.9599	174.6	0.8019	0.0208	0.5229	0.069
SQGTNPHMI	9	42.9599	174.6	0.8019	0.0208	0.5229	0.069	SB					VTIRNVTHI	9	50.69	13.87	0.9572	0.0044	0.757	0.0085
VTIRNVTHI	9	50.69	13.87	0.9572	0.0044	0.757	0.0085	SB					KTVTNLISETL	11	49.386	158.02	0.734	0.0331	0.5321	0.0646
KTVTNLISETL	11	49.386	158.02	0.734	0.0331	0.5321	0.0646	SB					TNVVNISTI	9	45.0038	40.3	0.8297	0.0176	0.6584	0.0193
TNVVNISTI	9	45.0038	40.3	0.8297	0.0176	0.6584	0.0193	SB					RSTINGEQI	9	48.0343	80.26	0.8141	0.0193	0.5947	0.0367
RSTINGEQI	9	48.0343	80.26	0.8141	0.0193	0.5947	0.0367	SB					KSLVNLEIL	9	47.6909	7.89	0.9788	0.0022	0.8091	0.0067
KSLVNLEIL	9	47.6909	7.89	0.9788	0.0022	0.8091	0.0067	SB					VGINLVEKI	9	41.2687	2652.21	0.2357	0.3862	0.2714	0.7848
VGINLVEKI	9	41.2687	2652.21	0.2357	0.3862	0.2714	0.7848	SB					VGPNNTRSI	9	44.4642	187.27	0.7676	0.0255	0.5164	0.0737
VGPNNTRSI	9	44.4642	187.27	0.7676	0.0255	0.5164	0.0737	SB					YAIDVTKVNPL	11	44.0514	398.13	0.3586	0.2159	0.4467	0.1504
YAIDVTKVNPL	11	44.0514	398.13	0.3586	0.2159	0.4467	0.1504	SB					FTLINEEML	9	44.3235	30.55	0.8911	0.0111	0.684	0.0143
FTLINEEML	9	44.3235	30.55	0.8911	0.0111	0.684	0.0143	SB					KTVKNVDII	9	47.7742	28.88	0.8758	0.0127	0.6892	0.0136
KTVKNVDII	9	47.7742	28.88	0.8758	0.0127	0.6892	0.0136	SB					SAVINNMQI	9	51.8395	10.86	0.9625	0.0038	0.7796	0.0077
SAVINNMQI	9	51.8395	10.86	0.9625	0.0038	0.7796	0.0077	SB					TSSINLSYI	9	45.0245	17.39	0.8902	0.0112	0.736	0.0093
TSSINLSYI	9	45.0245	17.39	0.8902	0.0112	0.736	0.0093	SB					LQNVMISIL	9	45.0048	4236.46	0.0952	1.0981	0.2281	1.2229
LQNVMISIL	9	45.0048	4236.46	0.0952	1.0981	0.2281	1.2229	WB					GTVVNKEAI	9	52.9558	88.41	0.775	0.0243	0.5858	0.0391
GTVVNKEAI	9	52.9558	88.41	0.775	0.0243	0.5858	0.0391	SB					ASLKNFKEL	9	44.9919	36.38	0.9435	0.0058	0.6678	0.0173
ASLKNFKEL	9	44.9919	36.38	0.9435	0.0058	0.6678	0.0173	SB					ISIKLTDSL	9	41.2557	341.79	0.6713	0.0459	0.4608	0.1287
ISIKLTDSL	9	41.2557	341.79	0.6713	0.0459	0.4608	0.1287	SB					SMLSNLTNL	9	51.1309	9.42	0.9581	0.0043	0.7927	0.0073
SMLSNLTNL	9	51.1309	9.42	0.9581	0.0043	0.7927	0.0073	SB					STLSVVHEL	9	64.1041	3327.64	0.391	0.182	0.2504	0.9847
STLSVVHEL	9	64.1041	3327.64	0.391	0.182	0.2504	0.9847	SB					IAPRSGLSL	9	40.8277	765.59	0.6165	0.0591	0.3862	0.2586
IAPRSGLSL	9	40.8277	765.59	0.6165	0.0591	0.3862	0.2586	SB					AAIRGNDVI	9	46.673	94.25	0.7549	0.0284	0.5798	0.0409
AAIRGNDVI	9	46.673	94.25	0.7549	0.0284	0.5798	0.0409	SB					TQNVNAAHL	9	50.7845	63.73	0.8647	0.0139	0.616	0.0311
TQNVNAAHL	9	50.7845	63.73	0.8647	0.0139	0.616	0.0311	SB					AMADTFLEHM	10	42.2818	4411.7	0.0995	1.0515	0.2244	1.2723
QIETGTPFIL	10	41.1722	36863.8	0.0008	27.6901	0.0282	43.7384	WB					KQLPLVKPYL	10	40.9824	5831.34	0.1924	0.5054	0.1986	1.7098
AMADTFLEHM	10	42.2818	4411.7	0.0995	1.0515	0.2244	1.2723	WB					EFIRNQEQM	9	42.9671	3285.25	0.1893	0.5179	0.2516	0.9711
KQLPLVKPYL	10	40.9824	5831.34	0.1924	0.5054	0.1986	1.7098	WB					YAHENDITHF	10	51.8288	180.89	0.7339	0.0332	0.5196	0.071
EFIRNQEQM	9	42.9671	3285.25	0.1893	0.5179	0.2516	0.9711	WB					RSLGNDVKSYL	11	43.2303	258.51	0.6496	0.0498	0.4866	0.102
TFIIDPAAVIR	11	64.1523	37186.7	0.0002	47.6154	0.0274	44.9859	WB					SAPANGILV	9	51.3483	17.88	0.9545	0.0046	0.7335	0.0094
AGSSEPVTGLDAK	13	63.4479	39967.8	0.0001	68.2353	0.0207	57.5724	WB					GGVRNGVAL	9	48.0691	122.23	0.7605	0.0271	0.5558	0.0504
YAHENDITHF	10	51.8288	180.89	0.7339	0.0332	0.5196	0.071	SB					GSVVNSVAL	9	50.1459	22.89	0.9297	0.0072	0.7106	0.0106
RSLGNDVKSYL	11	43.2303	258.51	0.6496	0.0498	0.4866	0.102	SB					YAPVSPIV	8	42.9635	10573.8	0.058	1.7872	0.1436	3.5477
ADVTPADF	8	64.2405	40770.6	0.0004	36.1936	0.0189	61.742	WB					FSPLNPVRVHI	11	45.8691	87.54	0.8063	0.0202	0.5867	0.0388
SAPANGILV	9	51.3483	17.88	0.9545	0.0046	0.7335	0.0094	SB					SAIKGLSAL	9	40.5339	172.4	0.7684	0.0253	0.524	0.0684
GGVRNGVAL	9	48.0691	122.23	0.7605	0.0271	0.5558	0.0504	SB					AQYGNILKHVM	11	40.9911	572.48	0.5817	0.0693	0.4131	0.2072
GSVVNSVAL	9	50.1459	22.89	0.9297	0.0072	0.7106	0.0106	SB					SGPDLSTAL	9	45.7678	3328.51	0.4183	0.1576	0.2504	0.985
YAPVSPIV	8	42.9635	10573.8	0.058	1.7872	0.1436	3.5477	WB					TVVNSQTL	8	45.4182	9309.34	0.0936	1.1173	0.1554	2.9844
FSPLNPVRVHI	11	45.8691	87.54	0.8063	0.0202	0.5867	0.0388	SB					GAIGNPEVL	9	45.2045	32.92	0.9592	0.0042	0.6771	0.0154
SAIKGLSAL	9	40.5339	172.4	0.7684	0.0253	0.524	0.0684	SB					GAIVNGKVL	9	45.7674	43.93	0.9027	0.01	0.6504	0.0219
AQYGNILKHVM	11	40.9911	572.48	0.5817	0.0693	0.4131	0.2072	SB					ASPTNPTAI	9	62.0639	17.19	0.9795	0.0021	0.7371	0.0092
GGNEQVTR	8	40.7972	46278.3	0.0002	45.8667	0.0071	93.4785	WB					TGVVNAQAL	9	53.0097	56.58	0.8488	0.0155	0.627	0.0285
SGPDLSTAL	9	45.7678	3328.51	0.4183	0.1576	0.2504	0.985	SB					SSGINGSFL	9	41.0491	27.76	0.9049	0.0097	0.6928	0.0131
CYGVDGESDSIM	12	50.2551	30868	0.0002	51.6667	0.0446	26.0562	WB					VGVVNPILA	9	43.4499	1213.1	0.2291	0.3981	0.3437	0.3823
TVVNSQTL	8	45.4182	9309.34	0.0936	1.1173	0.1554	2.9844	WB					SAGPKLPTI	9	42.9612	3678.12	0.3012	0.2807	0.2412	1.0766
FGGAMTDATALNI	13	52.7264	17182.7	0.0004	38.2222	0.0987	7.5013	WB					RGPENLLDHQM	11	46.2794	351.01	0.7687	0.0252	0.4583	0.1324
SFSLNDAL	8	49.2603	21185.4	0.0077	8.423	0.0794	11.0698	WB					AAPINTQGL	9	46.273	55.75	0.9471	0.0054	0.6284	0.0282
DITLTSANHAMI	12	49.5744	13555.2	0.0008	28.8788	0.1206	5.1062	WB					GALKNIVAV	9	44.4351	28.05	0.906	0.0096	0.6918	0.0132
GAIGNPEVL	9	45.2045	32.92	0.9592	0.0042	0.6771	0.0154	SB					SAIMNPASKVIAL	13	47.7157	56.77	0.6006	0.0638	0.6267	0.0286
GAIVNGKVL	9	45.7674	43.93	0.9027	0.01	0.6504	0.0219	SB					SGSLNAQVL	9	40.766	319.91	0.6916	0.0423	0.4669	0.1214
ASPTNPTAI	9	62.0639	17.19	0.9795	0.0021	0.7371	0.0092	SB					SGGDNKVTL	9	44.9996	903.93	0.6736	0.0455	0.3709	0.2924
LGGNVQRE	8	56.6793	45676.8	0	73.8462	0.0084	90.4874	WB					YAAAALPTL	9	47.1151	793.77	0.4803	0.1162	0.3829	0.2659
TGVVNAQAL	9	53.0097	56.58	0.8488	0.0155	0.627	0.0285	SB					GAVFNGITL	9	40.8346	36.77	0.9033	0.0099	0.6668	0.0175
MFTDQAQQDVI	11	50.5257	28978.2	0.0008	28.5758	0.0504	22.2208	WB					GSIINGFAL	9	41.2352	16.2	0.9335	0.0068	0.7426	0.009
GKLFNAII	8	64.1626	30053.4	0.0012	23.5804	0.047	24.3087	WB					AGPGNHVQL	9	42.9664	85.54	0.9087	0.0093	0.5888	0.0383
SSGINGSFL	9	41.0491	27.76	0.9049	0.0097	0.6928	0.0131	SB					ALLNGEYL	8	44.6616	460.25	0.3994	0.1741	0.4333	0.1771
VGVVNPILA	9	43.4499	1213.1	0.2291	0.3981	0.3437	0.3823	SB					GPVNHEEL	8	51.8384	5101.9	0.1284	0.8079	0.2109	1.4696
SAGPKLPTI	9	42.9612	3678.12	0.3012	0.2807	0.2412	1.0766	SB					GGIQNVGHI	9	47.552	84.45	0.769	0.0252	0.59	0.0379
RGPENLLDHQM	11	46.2794	351.01	0.7687	0.0252	0.4583	0.1324	SB					SVLNVNHI	8	64.2947	2978.55	0.2131	0.4434	0.2607	0.8753
AAPINTQGL	9	46.273	55.75	0.9471	0.0054	0.6284	0.0282	SB					VAPDLGVLL	9	45.1767	4524.82	0.3568	0.2181	0.222	1.3034
GALKNIVAV	9	44.4351	28.05	0.906	0.0096	0.6918	0.0132	SB					ISGVNGTHI	9	47.0404	46.89	0.8421	0.0163	0.6444	0.0243
LPSGSVAGSL	10	42.9657	35984.2	0.0007	30.1538	0.0304	40.5041	WB					TAPVNIAVI	9	52.127	5.57	0.9865	0.0014	0.8412	0.0056
SAIMNPASKVIAL	13	47.7157	56.77	0.6006	0.0638	0.6267	0.0286	SB					VSPLNVTAV	9	50.5647	22.1	0.9514	0.005	0.7139	0.0102
SGSLNAQVL	9	40.766	319.91	0.6916	0.0423	0.4669	0.1214	SB					AAGINVEII	9	49.6381	21.39	0.9142	0.0088	0.7169	0.0099
SGGDNKVTL	9	44.9996	903.93	0.6736	0.0455	0.3709	0.2924	SB					VALENANAV	9	42.9538	25.85	0.8944	0.0108	0.6994	0.0122
TPVISGGPY	9	66.7088	35134	0.0006	30.8654	0.0326	37.7093	WB					VAPSSVVEL	9	44.7554	239.19	0.8542	0.0149	0.4938	0.0948
YAAAALPTL	9	47.1151	793.77	0.4803	0.1162	0.3829	0.2659	SB					GAVTNVKVI	9	46.6545	139.43	0.7354	0.0328	0.5437	0.0588
AAIRSVMGA	9	42.9666	10258.5	0.0302	3.1717	0.1464	3.4075	WB					SAVQNVADV	9	45.1675	26.5	0.8547	0.0149	0.6971	0.0125
GAVFNGITL	9	40.8346	36.77	0.9033	0.0099	0.6668	0.0175	SB					SGLLNSQAL	9	49.3107	21.51	0.9492	0.0052	0.7164	0.01
GSIINGFAL	9	41.2352	16.2	0.9335	0.0068	0.7426	0.009	SB					GAPSNPDVF	9	48.0548	178.17	0.8182	0.0189	0.521	0.0699
AGPGNHVQL	9	42.9664	85.54	0.9087	0.0093	0.5888	0.0383	SB					SLGSNLVTL	9	48.2558	195.53	0.7387	0.0321	0.5124	0.0772
ALLNGEYL	8	44.6616	460.25	0.3994	0.1741	0.4333	0.1771	SB					AALQNAVAF	9	51.4719	28.76	0.9249	0.0077	0.6896	0.0135
GPVNHEEL	8	51.8384	5101.9	0.1284	0.8079	0.2109	1.4696	WB					SAPVNFISA	9	41.6969	25.91	0.8751	0.0128	0.6992	0.0122
ADEGISFR	8	41.9697	45705.5	0.0002	48.8333	0.0083	90.6309	WB					AISNLDYI	8	46.2272	109.33	0.4244	0.1524	0.5661	0.0462
GGIQNVGHI	9	47.552	84.45	0.769	0.0252	0.59	0.0379	SB					SGGSNIIYV	9	48.7946	56.79	0.8088	0.0199	0.6267	0.0286
SVLNVNHI	8	64.2947	2978.55	0.2131	0.4434	0.2607	0.8753	SB					SGVSNPHVI	9	48.2132	25.68	0.9515	0.005	0.7	0.0121
VAPDLGVLL	9	45.1767	4524.82	0.3568	0.2181	0.222	1.3034	SB					ISPVNPVAI	9	54.6471	14.86	0.9745	0.0026	0.7506	0.0088
ISGVNGTHI	9	47.0404	46.89	0.8421	0.0163	0.6444	0.0243	SB					GAPLNLVDL	9	51.0253	61.81	0.9019	0.01	0.6188	0.0304
TAPVNIAVI	9	52.127	5.57	0.9865	0.0014	0.8412	0.0056	SB					IMPNGDHI	8	64.1352	1942.68	0.2264	0.4047	0.3002	0.584
VSPLNVTAV	9	50.5647	22.1	0.9514	0.005	0.7139	0.0102	SB					VSPTGTHTL	9	46.4317	625.4	0.7575	0.0278	0.4049	0.2224
AAGINVEII	9	49.6381	21.39	0.9142	0.0088	0.7169	0.0099	SB					SAPINSVLL	9	52.9378	6.94	0.9915	0.0009	0.8209	0.0063
VALENANAV	9	42.9538	25.85	0.8944	0.0108	0.6994	0.0122	SB					GLIGNITLI	9	41.0185	1026.13	0.3465	0.2301	0.3592	0.3287
VAPSSVVEL	9	44.7554	239.19	0.8542	0.0149	0.4938	0.0948	SB					AALANLDNI	9	48.9545	4.04	0.9861	0.0014	0.8711	0.0045
GAVTNVKVI	9	46.6545	139.43	0.7354	0.0328	0.5437	0.0588	SB					VSAQNLVAI	9	48.05	21.25	0.9289	0.0073	0.7175	0.0099
VSVLVNCPA	9	40.886	9774.99	0.0024	16.6272	0.1509	3.1953	WB					GSVRNAVVL	9	46.6287	41.76	0.8846	0.0118	0.6551	0.02
SAVQNVADV	9	45.1675	26.5	0.8547	0.0149	0.6971	0.0125	SB					SQGVGQVQL	9	44.9787	4955.92	0.2981	0.2841	0.2136	1.4262
SGLLNSQAL	9	49.3107	21.51	0.9492	0.0052	0.7164	0.01	SB					AALVNLDSL	9	53.0385	3.17	0.9959	0.0004	0.8935	0.0037
GAPSNPDVF	9	48.0548	178.17	0.8182	0.0189	0.521	0.0699	SB					SGPKDVTVL	9	45.0937	556.42	0.7261	0.035	0.4157	0.2023
SLGSNLVTL	9	48.2558	195.53	0.7387	0.0321	0.5124	0.0772	SB					GGNINVETI	9	46.4836	80.63	0.809	0.0199	0.5943	0.0368
GAQGSPFLK	9	40.7693	39876.7	0.0003	39.5	0.0209	57.1093	WB					ASIVNKDGL	9	46.2402	18.53	0.9584	0.0043	0.7302	0.0095
AALQNAVAF	9	51.4719	28.76	0.9249	0.0077	0.6896	0.0135	SB					SSLKNGVVL	9	45.9013	7.04	0.9914	0.0009	0.8197	0.0063
SAPVNFISA	9	41.6969	25.91	0.8751	0.0128	0.6992	0.0122	SB					VLTNQETI	8	43.7036	3926.39	0.1184	0.88	0.2352	1.1406
AISNLDYI	8	46.2272	109.33	0.4244	0.1524	0.5661	0.0462	SB					GSIANLTEL	9	44.7757	9.4	0.9801	0.002	0.7929	0.0073
SGGSNIIYV	9	48.7946	56.79	0.8088	0.0199	0.6267	0.0286	SB					SAGINPFNV	9	61.2966	98.15	0.7558	0.0282	0.5761	0.0424
SGVSNPHVI	9	48.2132	25.68	0.9515	0.005	0.7	0.0121	SB					GPQNIYNL	8	42.9632	12329.1	0.0615	1.6941	0.1294	4.4217
ISPVNPVAI	9	54.6471	14.86	0.9745	0.0026	0.7506	0.0088	SB					SAPTGSGKTL	10	45.0539	2698.23	0.329	0.2504	0.2698	0.797
GAPLNLVDL	9	51.0253	61.81	0.9019	0.01	0.6188	0.0304	SB					VSPRGAGYL	9	40.7907	1147.39	0.3838	0.1889	0.3489	0.3645
IMPNGDHI	8	64.1352	1942.68	0.2264	0.4047	0.3002	0.584	SB					AGLVNIVSF	9	40.8277	106.22	0.8303	0.0175	0.5688	0.0452
VSPTGTHTL	9	46.4317	625.4	0.7575	0.0278	0.4049	0.2224	SB					VAIGNPVHL	9	48.4238	17.9	0.9804	0.002	0.7334	0.0094
APDLGQVTL	9	48.0898	26609.9	0.0414	2.4426	0.0583	18.1005	WB					FGGLNADNI	9	55.9786	66.53	0.607	0.0619	0.612	0.0322
SAPINSVLL	9	52.9378	6.94	0.9915	0.0009	0.8209	0.0063	SB					SSLSNAKDV	9	53.7662	389.94	0.4884	0.1121	0.4486	0.1473
GLIGNITLI	9	41.0185	1026.13	0.3465	0.2301	0.3592	0.3287	SB					SPTNLEFI	8	41.2007	1323.85	0.2202	0.4229	0.3356	0.4135
AALANLDNI	9	48.9545	4.04	0.9861	0.0014	0.8711	0.0045	SB					AALYNAGQL	9	41.0204	56.09	0.8404	0.0164	0.6278	0.0283
VSAQNLVAI	9	48.05	21.25	0.9289	0.0073	0.7175	0.0099	SB					AGPTNVHLI	9	53.0111	15.95	0.967	0.0034	0.744	0.009
GSVRNAVVL	9	46.6287	41.76	0.8846	0.0118	0.6551	0.02	SB					GSIANFTNV	9	41.0196	27.46	0.8541	0.0149	0.6938	0.0129
SQGVGQVQL	9	44.9787	4955.92	0.2981	0.2841	0.2136	1.4262	SB					GAVQNIAHL	9	58.0965	14.92	0.9706	0.003	0.7502	0.0088
AALVNLDSL	9	53.0385	3.17	0.9959	0.0004	0.8935	0.0037	SB					VIAPNPAQL	9	65.0042	2987.33	0.3705	0.2021	0.2604	0.8777
SGPKDVTVL	9	45.0937	556.42	0.7261	0.035	0.4157	0.2023	SB					AMGVNLTSM	9	53.4971	23.69	0.8766	0.0126	0.7075	0.011
GGNINVETI	9	46.4836	80.63	0.809	0.0199	0.5943	0.0368	SB					AVSNKYEL	8	44.7195	8324.09	0.0831	1.2607	0.1657	2.5862
GINEAGISR	9	69.9441	45531.3	0.0001	61.6667	0.0087	89.7168	WB					VPPVNGVEI	9	58.1263	1391.44	0.3809	0.1917	0.331	0.4344
LGNVVSDGR	9	70.0392	41671.5	0.0001	56.8182	0.0168	66.6874	WB					SALVSSLHL	9	47.1245	89.01	0.8551	0.0148	0.5851	0.0392
ASIVNKDGL	9	46.2402	18.53	0.9584	0.0043	0.7302	0.0095	SB					IGLQNGVLL	9	47.1697	36.07	0.9129	0.0089	0.6686	0.0172
SSLKNGVVL	9	45.9013	7.04	0.9914	0.0009	0.8197	0.0063	SB					SALTGGTAHL	10	44.9983	1333.99	0.3705	0.2021	0.3349	0.4167
VLTNQETI	8	43.7036	3926.39	0.1184	0.88	0.2352	1.1406	WB					AQGINVNLV	9	40.6749	483.47	0.5201	0.0976	0.4287	0.1835
GSIANLTEL	9	44.7757	9.4	0.9801	0.002	0.7929	0.0073	SB					VGLNNINAL	9	43.5058	42.72	0.9024	0.01	0.653	0.0208
SAGINPFNV	9	61.2966	98.15	0.7558	0.0282	0.5761	0.0424	SB					VAPLNLGMI	9	49.8397	39.19	0.8281	0.0178	0.661	0.0188
GPQNIYNL	8	42.9632	12329.1	0.0615	1.6941	0.1294	4.4217	WB					GSIVNIIVL	9	49.4852	14.96	0.9673	0.0033	0.75	0.0088
SAPTGSGKTL	10	45.0539	2698.23	0.329	0.2504	0.2698	0.797	SB					SGIRGLIVL	9	45.0498	747.68	0.5197	0.0977	0.3884	0.2537
VSPRGAGYL	9	40.7907	1147.39	0.3838	0.1889	0.3489	0.3645	SB					ASVVHSTDL	9	61.7964	1760.61	0.3093	0.2719	0.3093	0.5374
AGLVNIVSF	9	40.8277	106.22	0.8303	0.0175	0.5688	0.0452	SB					LSPANGEQI	9	45.8862	37.33	0.9184	0.0083	0.6654	0.0178
VAIGNPVHL	9	48.4238	17.9	0.9804	0.002	0.7334	0.0094	SB					ASVPNLQTV	9	45.0492	24.57	0.9592	0.0042	0.7041	0.0115
FGGLNADNI	9	55.9786	66.53	0.607	0.0619	0.612	0.0322	SB					IAVANAQEL	9	52.7406	17.03	0.9537	0.0047	0.738	0.0092
SSLSNAKDV	9	53.7662	389.94	0.4884	0.1121	0.4486	0.1473	SB					SAVPNQISI	9	47.4301	9.48	0.9855	0.0015	0.7921	0.0073
SPTNLEFI	8	41.2007	1323.85	0.2202	0.4229	0.3356	0.4135	SB					ASIANLINL	9	45.5372	12.13	0.9746	0.0026	0.7693	0.0081
TPNISEFL	8	39.9949	32713.9	0.0043	12.0837	0.0392	30.5438	WB					SSSSNISTM	9	53.3573	24.72	0.9495	0.0052	0.7035	0.0116
AALYNAGQL	9	41.0204	56.09	0.8404	0.0164	0.6278	0.0283	SB					SSTSNFSSL	9	44.5829	38.06	0.9227	0.0079	0.6637	0.0182
KSGMLESGI	9	38.6913	21082	0.0069	9.0268	0.0798	10.9627	WB					AAEVNPESL	9	54.4279	111.28	0.8798	0.0123	0.5645	0.0469
AGPTNVHLI	9	53.0111	15.95	0.967	0.0034	0.744	0.009	SB					SGPSNLLEI	9	54.0349	9.86	0.9751	0.0025	0.7885	0.0074
GSIANFTNV	9	41.0196	27.46	0.8541	0.0149	0.6938	0.0129	SB					AAIVDGDRI	9	45.9557	116.14	0.715	0.0375	0.5605	0.0484
GAVQNIAHL	9	58.0965	14.92	0.9706	0.003	0.7502	0.0088	SB					AALLNTDLV	9	54.5141	5.17	0.9773	0.0023	0.8482	0.0053
VIAPNPAQL	9	65.0042	2987.33	0.3705	0.2021	0.2604	0.8777	SB					VSVANVDLL	9	54.5212	7.62	0.9734	0.0027	0.8123	0.0066
AMGVNLTSM	9	53.4971	23.69	0.8766	0.0126	0.7075	0.011	SB					GSVINEVVL	9	52.6911	70.38	0.8586	0.0145	0.6068	0.0335
AVSNKYEL	8	44.7195	8324.09	0.0831	1.2607	0.1657	2.5862	WB					GTIVNGKQI	9	44.79	739.49	0.4999	0.1064	0.3895	0.2515
VPPVNGVEI	9	58.1263	1391.44	0.3809	0.1917	0.331	0.4344	SB					ASLVNADKL	9	52.0532	7.22	0.9864	0.0014	0.8173	0.0064
SALVSSLHL	9	47.1245	89.01	0.8551	0.0148	0.5851	0.0392	SB					ISTQNVVGL	9	42.9674	515.54	0.6143	0.0598	0.4228	0.1918
IGLQNGVLL	9	47.1697	36.07	0.9129	0.0089	0.6686	0.0172	SB					SLGISLVEL	9	49.4983	8195.04	0.0848	1.2327	0.1671	2.5306
SALTGGTAHL	10	44.9983	1333.99	0.3705	0.2021	0.3349	0.4167	SB					TSPVNPAVF	9	44.5539	149.25	0.8181	0.0189	0.5374	0.0621
AQGINVNLV	9	40.6749	483.47	0.5201	0.0976	0.4287	0.1835	SB					SIRNLDTI	8	45.1357	284.04	0.3905	0.1825	0.4779	0.1106
VGLNNINAL	9	43.5058	42.72	0.9024	0.01	0.653	0.0208	SB					TAPSSQQTL	9	48.0733	426.08	0.8373	0.0168	0.4404	0.1634
VAPLNLGMI	9	49.8397	39.19	0.8281	0.0178	0.661	0.0188	SB					AGILDTETL	9	41.3243	253.79	0.725	0.0352	0.4883	0.1003
GSIVNIIVL	9	49.4852	14.96	0.9673	0.0033	0.75	0.0088	SB					GTINNTVTL	9	52.9327	57.21	0.9108	0.0091	0.626	0.0287
GVAGSVLLVL	10	49.5389	28257.7	0.0052	10.8145	0.0527	20.8708	WB					RSLSNSGVL	9	52.9773	45.74	0.8578	0.0146	0.6467	0.0234
SGIRGLIVL	9	45.0498	747.68	0.5197	0.0977	0.3884	0.2537	SB					GSLKNVTTL	9	47.3639	11.94	0.9819	0.0019	0.7708	0.008
ASVVHSTDL	9	61.7964	1760.61	0.3093	0.2719	0.3093	0.5374	SB					STLQGADEL	9	49.0839	430.42	0.6255	0.0566	0.4395	0.1653
LSPANGEQI	9	45.8862	37.33	0.9184	0.0083	0.6654	0.0178	SB					AALVNPDSF	9	40.7998	17.87	0.9576	0.0043	0.7335	0.0094
ASVPNLQTV	9	45.0492	24.57	0.9592	0.0042	0.7041	0.0115	SB					TTVANVETV	9	48.9839	41.64	0.8663	0.0137	0.6554	0.0199
IAVANAQEL	9	52.7406	17.03	0.9537	0.0047	0.738	0.0092	SB					SIISNTEAV	9	53.1017	54.35	0.7918	0.0221	0.6307	0.0277
SAVPNQISI	9	47.4301	9.48	0.9855	0.0015	0.7921	0.0073	SB					YAPAAATVAV	10	47.9037	3769.98	0.0833	1.2586	0.2389	1.0986
VENRGLAGI	9	49.1244	28920.9	0.0038	12.8783	0.0506	22.1122	WB					SSPKSTLTL	9	40.8793	416.34	0.8028	0.0207	0.4425	0.1589
ASIANLINL	9	45.5372	12.13	0.9746	0.0026	0.7693	0.0081	SB					ALINKDFL	8	41.9425	1345.66	0.2477	0.3645	0.3341	0.4204
SSSSNISTM	9	53.3573	24.72	0.9495	0.0052	0.7035	0.0116	SB					SSPLNSTQT	9	42.9463	434.42	0.5433	0.0902	0.4386	0.1671
SSTSNFSSL	9	44.5829	38.06	0.9227	0.0079	0.6637	0.0182	SB					AGIALNDNF	9	64.5212	5614.28	0.1288	0.8049	0.2021	1.6294
AAEVNPESL	9	54.4279	111.28	0.8798	0.0123	0.5645	0.0469	SB					SAIMNPASK	9	41.8493	2949.59	0.112	0.9321	0.2616	0.8675
EPVTGLDAK	9	64.182	42238.9	0.0001	53	0.0156	69.9274	WB					SALLSIAFL	9	42.9553	42.45	0.838	0.0167	0.6536	0.0206
SGPSNLLEI	9	54.0349	9.86	0.9751	0.0025	0.7885	0.0074	SB					YSLPNAGDV	9	40.9692	179.44	0.538	0.0919	0.5203	0.0704
AAIVDGDRI	9	45.9557	116.14	0.715	0.0375	0.5605	0.0484	SB					SSSTNVDLL	9	44.9881	17.31	0.9562	0.0045	0.7365	0.0092
AALLNTDLV	9	54.5141	5.17	0.9773	0.0023	0.8482	0.0053	SB					SVGVNLEAF	9	42.1315	522.49	0.4654	0.1237	0.4216	0.1936
VSVANVDLL	9	54.5212	7.62	0.9734	0.0027	0.8123	0.0066	SB					MGLSNVTVV	9	47.3659	20.13	0.8512	0.0153	0.7225	0.0097
GSVINEVVL	9	52.6911	70.38	0.8586	0.0145	0.6068	0.0335	SB					SGLVNHVPL	9	49.6898	5.63	0.9713	0.0029	0.8402	0.0056
GTIVNGKQI	9	44.79	739.49	0.4999	0.1064	0.3895	0.2515	SB					SLKNFITI	8	40.8311	1930.96	0.1799	0.5567	0.3007	0.5812
YAHINALE	8	44.6606	13066.7	0.0138	5.7234	0.124	4.8288	WB					NGVINAAFM	9	51.9787	48.01	0.6669	0.0467	0.6422	0.0251
AKITAQEAV	9	41.9985	13062	0.0337	2.9043	0.1241	4.8262	WB					SGPLDSTFI	9	40.9424	168.8	0.655	0.0488	0.526	0.0675
ASLVNADKL	9	52.0532	7.22	0.9864	0.0014	0.8173	0.0064	SB					AVVANVQHV	9	45.3713	392.22	0.591	0.0666	0.4481	0.1482
ISTQNVVGL	9	42.9674	515.54	0.6143	0.0598	0.4228	0.1918	SB					SSLINGSFL	9	52.6511	4.75	0.9885	0.0012	0.8561	0.0051
SLGISLVEL	9	49.4983	8195.04	0.0848	1.2327	0.1671	2.5306	WB					SVASNISFI	9	47.8481	83.25	0.7369	0.0325	0.5913	0.0376
RSMMSAYERSM	11	56.1608	2544.47	0.0441	2.3265	0.2752	0.7556	WB					HILANADAI	9	44.9858	89.53	0.6016	0.0635	0.5846	0.0394
TSPVNPAVF	9	44.5539	149.25	0.8181	0.0189	0.5374	0.0621	SB					ASAVSNNYI	9	40.8341	870.81	0.3508	0.225	0.3743	0.2848
SIRNLDTI	8	45.1357	284.04	0.3905	0.1825	0.4779	0.1106	SB					SAVTTFEAL	9	40.9877	128.16	0.7587	0.0275	0.5514	0.0534
TAPSSQQTL	9	48.0733	426.08	0.8373	0.0168	0.4404	0.1634	SB					VAMANTVAM	9	49.886	5.05	0.976	0.0025	0.8503	0.0053
NSIRNLDT	8	42.9597	9696.09	0.0194	4.4813	0.1516	3.1597	WB					AMGTQGNVM	9	44.5725	7090.92	0.0918	1.1395	0.1805	2.1351
AGILDTETL	9	41.3243	253.79	0.725	0.0352	0.4883	0.1003	SB					AAPSDTHEI	9	54.091	279.14	0.8189	0.0188	0.4795	0.109
GTINNTVTL	9	52.9327	57.21	0.9108	0.0091	0.626	0.0287	SB					FSPYNGGSL	9	40.337	105.06	0.7919	0.0221	0.5698	0.0448
RSLSNSGVL	9	52.9773	45.74	0.8578	0.0146	0.6467	0.0234	SB					YAFNGGTVL	9	42.9664	208.05	0.6742	0.0454	0.5067	0.0823
GSLKNVTTL	9	47.3639	11.94	0.9819	0.0019	0.7708	0.008	SB					ASLSNLHSL	9	43.619	8.3	0.9909	0.0009	0.8044	0.0069
STLQGADEL	9	49.0839	430.42	0.6255	0.0566	0.4395	0.1653	SB					SSLLDSAHL	9	45.8451	292.49	0.6916	0.0423	0.4752	0.1132
AALVNPDSF	9	40.7998	17.87	0.9576	0.0043	0.7335	0.0094	SB					SQVINPTAI	9	53.0269	15.64	0.9598	0.0041	0.7458	0.0089
TTVANVETV	9	48.9839	41.64	0.8663	0.0137	0.6554	0.0199	SB					AALKLGQEL	9	42.6799	746.8	0.6488	0.05	0.3885	0.2535
SIISNTEAV	9	53.1017	54.35	0.7918	0.0221	0.6307	0.0277	SB					SQMMGGMGL	9	64.6958	3239.12	0.1824	0.5463	0.2529	0.9561
YAPAAATVAV	10	47.9037	3769.98	0.0833	1.2586	0.2389	1.0986	WB					SAPDNVLEV	9	48.7472	43.79	0.9381	0.0063	0.6507	0.0218
SSPKSTLTL	9	40.8793	416.34	0.8028	0.0207	0.4425	0.1589	SB					KAPELGDTI	9	52.8388	144.3	0.833	0.0173	0.5405	0.0607
FPLTTEIL	8	48.9439	29343.6	0.0042	12.2757	0.0493	22.908	WB					AAVIDEDVL	9	44.9114	554.53	0.536	0.0925	0.4161	0.2017
ALINKDFL	8	41.9425	1345.66	0.2477	0.3645	0.3341	0.4204	SB					SQIGNLEAL	9	41.3973	17.7	0.9555	0.0046	0.7344	0.0093
SSPLNSTQT	9	42.9463	434.42	0.5433	0.0902	0.4386	0.1671	SB					VGLINKDSV	9	51.2474	40	0.8301	0.0176	0.6591	0.0192
AGIALNDNF	9	64.5212	5614.28	0.1288	0.8049	0.2021	1.6294	WB					VAIMVLEGL	9	41.6702	2465.55	0.2124	0.4455	0.2782	0.7334
SAIMNPASK	9	41.8493	2949.59	0.112	0.9321	0.2616	0.8675	WB					KAIVNVIGM	9	44.5852	12.09	0.9632	0.0038	0.7697	0.0081
SALLSIAFL	9	42.9553	42.45	0.838	0.0167	0.6536	0.0206	SB					GSPVNGSSQL	10	49.5124	557.3	0.6331	0.0544	0.4156	0.2026
YSLPNAGDV	9	40.9692	179.44	0.538	0.0919	0.5203	0.0704	SB					AAPSNLPYL	9	53.573	6.04	0.9943	0.0006	0.8338	0.0058
SSSTNVDLL	9	44.9881	17.31	0.9562	0.0045	0.7365	0.0092	SB					SSPVNPVVF	9	54.1951	59.8	0.9247	0.0077	0.6219	0.0297
DPKFEVIDKPQS	12	41.0342	47230.8	0	96	0.0053	95.9703	WB					AGPRGMGTAL	10	51.6294	5517.39	0.1282	0.8097	0.2037	1.5938
SVGVNLEAF	9	42.1315	522.49	0.4654	0.1237	0.4216	0.1936	SB					STVVNADQI	9	44.9799	9.05	0.9605	0.004	0.7965	0.0071
MGLSNVTVV	9	47.3659	20.13	0.8512	0.0153	0.7225	0.0097	SB					YAPINANAI	9	58.4377	5.45	0.9834	0.0017	0.8434	0.0055
SGLVNHVPL	9	49.6898	5.63	0.9713	0.0029	0.8402	0.0056	SB					SSIVNSIQV	9	52.9483	6.89	0.9849	0.0015	0.8217	0.0063
SLKNFITI	8	40.8311	1930.96	0.1799	0.5567	0.3007	0.5812	WB					SSIVNKEGL	9	53.0813	13.2	0.9772	0.0023	0.7616	0.0084
NGVINAAFM	9	51.9787	48.01	0.6669	0.0467	0.6422	0.0251	SB					SQALNTTVL	9	48.7053	32.7	0.9444	0.0057	0.6777	0.0153
SGPLDSTFI	9	40.9424	168.8	0.655	0.0488	0.526	0.0675	SB					SAPAASTETL	10	47.8957	527.53	0.6665	0.0468	0.4207	0.1948
AVVANVQHV	9	45.3713	392.22	0.591	0.0666	0.4481	0.1482	SB					YAIGNAPEL	9	38.0381	12.9	0.9749	0.0026	0.7637	0.0083
SSLINGSFL	9	52.6511	4.75	0.9885	0.0012	0.8561	0.0051	SB					ASVSNPLFL	9	51.3794	20.48	0.9635	0.0037	0.7209	0.0098
SVASNISFI	9	47.8481	83.25	0.7369	0.0325	0.5913	0.0376	SB					SLGKNTESL	9	64.0424	615.22	0.5677	0.0748	0.4065	0.2196
HILANADAI	9	44.9858	89.53	0.6016	0.0635	0.5846	0.0394	SB					ATLSNTQTL	9	42.9474	20.61	0.9723	0.0028	0.7203	0.0098
ASAVSNNYI	9	40.8341	870.81	0.3508	0.225	0.3743	0.2848	SB					SSLVNSQTL	9	51.8081	3.75	0.9971	0.0003	0.8779	0.0043
SAVTTFEAL	9	40.9877	128.16	0.7587	0.0275	0.5514	0.0534	SB					VGVVSVEFI	9	44.6923	308.81	0.4001	0.1734	0.4702	0.1181
VAMANTVAM	9	49.886	5.05	0.976	0.0025	0.8503	0.0053	SB					AANVNAKDM	9	61.2452	817.95	0.4062	0.1681	0.3801	0.272
GVDNPGHPF	9	42.9467	30405	0.0144	5.5497	0.046	25.0149	WB					AGVSNIIEF	9	49.4811	133.44	0.808	0.02	0.5477	0.056
AMGTQGNVM	9	44.5725	7090.92	0.0918	1.1395	0.1805	2.1351	WB					SVIGSIFNI	9	51.3615	4710.76	0.113	0.9228	0.2183	1.3564
AAPSDTHEI	9	54.091	279.14	0.8189	0.0188	0.4795	0.109	SB					SLGINPHVL	9	48.3065	616.59	0.6346	0.054	0.4063	0.22
SGPGFGMSSV	10	49.1337	9081.52	0.0449	2.2913	0.1577	2.8962	WB					TALLNAPHI	9	52.0183	10.31	0.9691	0.0032	0.7844	0.0076
FSPYNGGSL	9	40.337	105.06	0.7919	0.0221	0.5698	0.0448	SB					SVMENSKVLGEAM	13	52.9288	642.48	0.2703	0.3238	0.4025	0.2271
YAFNGGTVL	9	42.9664	208.05	0.6742	0.0454	0.5067	0.0823	SB					GSIVNEGYL	9	46.2525	21.64	0.9031	0.0099	0.7158	0.01
ASLSNLHSL	9	43.619	8.3	0.9909	0.0009	0.8044	0.0069	SB					SGIQAAYEI	9	49.042	936.37	0.3543	0.221	0.3676	0.2996
SSLLDSAHL	9	45.8451	292.49	0.6916	0.0423	0.4752	0.1132	SB					SSVLNVVSM	9	53.0165	7.25	0.9832	0.0017	0.8169	0.0064
SQVINPTAI	9	53.0269	15.64	0.9598	0.0041	0.7458	0.0089	SB					FGPINSVAF	9	49.3147	83.7	0.8007	0.0209	0.5908	0.0377
AALKLGQEL	9	42.6799	746.8	0.6488	0.05	0.3885	0.2535	SB					GAVFNQVAF	9	42.9666	356.16	0.5525	0.0824	0.457	0.1345
SQMMGGMGL	9	64.6958	3239.12	0.1824	0.5463	0.2529	0.9561	WB					ASHLNLDAL	9	50.8843	9.06	0.9747	0.0026	0.7963	0.0071
SAPDNVLEV	9	48.7472	43.79	0.9381	0.0063	0.6507	0.0218	SB					EGIINGHTL	9	42.967	156.94	0.7982	0.0213	0.5327	0.0643
KAPELGDTI	9	52.8388	144.3	0.833	0.0173	0.5405	0.0607	SB					LSHGNLTVL	9	44.9463	113.51	0.8037	0.0205	0.5627	0.0476
AAVIDEDVL	9	44.9114	554.53	0.536	0.0925	0.4161	0.2017	SB					YSLSNTISA	9	42.9647	46.82	0.7603	0.0271	0.6445	0.0242
SQIGNLEAL	9	41.3973	17.7	0.9555	0.0046	0.7344	0.0093	SB					GTNVSTTYI	9	42.9645	3627.45	0.1324	0.7816	0.2425	1.0642
VGLINKDSV	9	51.2474	40	0.8301	0.0176	0.6591	0.0192	SB					SGHTNAVATV	10	48.2563	491.99	0.3857	0.1871	0.4271	0.1858
VAIMVLEGL	9	41.6702	2465.55	0.2124	0.4455	0.2782	0.7334	SB					SAIHNSTKV	9	53.3171	19.68	0.9453	0.0056	0.7246	0.0097
KAIVNVIGM	9	44.5852	12.09	0.9632	0.0038	0.7697	0.0081	SB					AAVIAHDFL	9	41.8978	119.24	0.6937	0.0419	0.5581	0.0494
GSPVNGSSQL	10	49.5124	557.3	0.6331	0.0544	0.4156	0.2026	SB					AGLTHLITM	9	45.9841	289.65	0.6579	0.0483	0.4761	0.1123
AAPSNLPYL	9	53.573	6.04	0.9943	0.0006	0.8338	0.0058	SB					RNIQNAGAI	9	45.0057	290.78	0.432	0.1465	0.4757	0.1127
SSPVNPVVF	9	54.1951	59.8	0.9247	0.0077	0.6219	0.0297	SB					VAVVNKVDI	9	52.9585	37.48	0.8216	0.0185	0.6651	0.0179
AGPRGMGTAL	10	51.6294	5517.39	0.1282	0.8097	0.2037	1.5938	WB					SMRNTSVM	8	42.9669	1883.36	0.145	0.6996	0.3031	0.5694
STVVNADQI	9	44.9799	9.05	0.9605	0.004	0.7965	0.0071	SB					GSLSNHTEL	9	44.9672	13.16	0.9757	0.0025	0.7618	0.0084
YAPINANAI	9	58.4377	5.45	0.9834	0.0017	0.8434	0.0055	SB					SAPANPSSNI	10	42.9629	58.25	0.8648	0.0138	0.6243	0.0291
SSIVNSIQV	9	52.9483	6.89	0.9849	0.0015	0.8217	0.0063	SB					GGHVNLTML	9	47.1121	148	0.7482	0.0299	0.5381	0.0618
SAGAKELTGL	10	42.963	20589	0.017	4.9436	0.082	10.4914	WB					KAPVDDVTL	9	47.97	578.16	0.7162	0.0372	0.4122	0.2089
SSIVNKEGL	9	53.0813	13.2	0.9772	0.0023	0.7616	0.0084	SB					AVLTNPETL	9	49.5393	19.61	0.9738	0.0027	0.725	0.0097
SQALNTTVL	9	48.7053	32.7	0.9444	0.0057	0.6777	0.0153	SB					GSLVNQNLL	9	48.787	32.19	0.9192	0.0083	0.6791	0.015
SAPAASTETL	10	47.8957	527.53	0.6665	0.0468	0.4207	0.1948	SB					RAIDNAADL	9	49.176	62.56	0.8586	0.0145	0.6177	0.0307
YAIGNAPEL	9	38.0381	12.9	0.9749	0.0026	0.7637	0.0083	SB					GIENIHYL	8	53.7893	2140.63	0.2987	0.2834	0.2912	0.6403
ASVSNPLFL	9	51.3794	20.48	0.9635	0.0037	0.7209	0.0098	SB					SSPSNLQII	9	44.8679	11.5	0.9813	0.0019	0.7743	0.0079
SLGKNTESL	9	64.0424	615.22	0.5677	0.0748	0.4065	0.2196	SB					ALIQNADTL	9	49.577	21.23	0.9335	0.0068	0.7176	0.0099
ATLSNTQTL	9	42.9474	20.61	0.9723	0.0028	0.7203	0.0098	SB					KSNVNIGNL	9	44.7307	466.76	0.561	0.0776	0.432	0.179
SSLVNSQTL	9	51.8081	3.75	0.9971	0.0003	0.8779	0.0043	SB					VGVNNPVFL	9	51.7577	38.09	0.9188	0.0083	0.6636	0.0182
VGVVSVEFI	9	44.6923	308.81	0.4001	0.1734	0.4702	0.1181	SB					AMPINKATI	9	47.9816	30.61	0.8948	0.0108	0.6838	0.0143
AANVNAKDM	9	61.2452	817.95	0.4062	0.1681	0.3801	0.272	SB					KATINIDAI	9	47.9164	8.86	0.9504	0.0051	0.7983	0.0071
AGVSNIIEF	9	49.4811	133.44	0.808	0.02	0.5477	0.056	SB					NVLSKADVI	9	51.7904	7182.73	0.0705	1.4931	0.1793	2.1696
SVIGSIFNI	9	51.3615	4710.76	0.113	0.9228	0.2183	1.3564	WB					SAVENVVKL	9	46.9416	12.65	0.9857	0.0015	0.7655	0.0082
SLGINPHVL	9	48.3065	616.59	0.6346	0.054	0.4063	0.22	SB					GSLRNVLSL	9	53.0051	32.08	0.9206	0.0081	0.6795	0.0149
TALLNAPHI	9	52.0183	10.31	0.9691	0.0032	0.7844	0.0076	SB					FLQNSTHL	8	47.1871	3828.72	0.1825	0.5459	0.2375	1.1144
SVMENSKVLGEAM	13	52.9288	642.48	0.2703	0.3238	0.4025	0.2271	SB					ESPINVTTV	9	43.0862	139.18	0.8232	0.0183	0.5438	0.0587
GSIVNEGYL	9	46.2525	21.64	0.9031	0.0099	0.7158	0.01	SB					EAVVNTVDI	9	40.9418	542.24	0.3602	0.2141	0.4181	0.1984
SGIQAAYEI	9	49.042	936.37	0.3543	0.221	0.3676	0.2996	SB					NSVINVSNL	9	47.2404	62.16	0.85	0.0154	0.6183	0.0305
SSVLNVVSM	9	53.0165	7.25	0.9832	0.0017	0.8169	0.0064	SB					ASQANKDLL	9	52.6088	98.19	0.8516	0.0152	0.5761	0.0424
FGPINSVAF	9	49.3147	83.7	0.8007	0.0209	0.5908	0.0377	SB					SGLLNQQSL	9	50.2672	23.64	0.9592	0.0042	0.7077	0.011
GAVFNQVAF	9	42.9666	356.16	0.5525	0.0824	0.457	0.1345	SB					DALTNLTVL	9	45.7312	122.95	0.7542	0.0285	0.5553	0.0508
ASHLNLDAL	9	50.8843	9.06	0.9747	0.0026	0.7963	0.0071	SB					TLGINDTLI	9	43.5425	2005.16	0.1789	0.561	0.2973	0.5991
EGIINGHTL	9	42.967	156.94	0.7982	0.0213	0.5327	0.0643	SB					KAVSNINTL	9	40.9616	6.59	0.9916	0.0009	0.8258	0.0061
LSHGNLTVL	9	44.9463	113.51	0.8037	0.0205	0.5627	0.0476	SB					AMPSNSPVAA	10	42.9525	3584.96	0.0815	1.2873	0.2436	1.0537
YSLSNTISA	9	42.9647	46.82	0.7603	0.0271	0.6445	0.0242	SB					SALVSSLHM	9	41.2295	78.62	0.8206	0.0186	0.5966	0.0362
GTNVSTTYI	9	42.9645	3627.45	0.1324	0.7816	0.2425	1.0642	WB					VSSINQEAL	9	42.7563	55.53	0.8892	0.0113	0.6287	0.0281
SGHTNAVATV	10	48.2563	491.99	0.3857	0.1871	0.4271	0.1858	SB					RSGVNSELV	9	41.195	93.68	0.6906	0.0424	0.5804	0.0407
SAIHNSTKV	9	53.3171	19.68	0.9453	0.0056	0.7246	0.0097	SB					ASNVSKELL	9	44.9888	3102.96	0.2814	0.3036	0.2569	0.9105
AAVIAHDFL	9	41.8978	119.24	0.6937	0.0419	0.5581	0.0494	SB					VTVVNSQTL	9	45.1153	27.61	0.9462	0.0055	0.6933	0.013
AGLTHLITM	9	45.9841	289.65	0.6579	0.0483	0.4761	0.1123	SB					GAPINKYVV	9	41.1189	59.97	0.8835	0.0119	0.6216	0.0297
RNIQNAGAI	9	45.0057	290.78	0.432	0.1465	0.4757	0.1127	SB					LGPKNGVYI	9	45.3823	21.24	0.9309	0.0071	0.7176	0.0099
VAVVNKVDI	9	52.9585	37.48	0.8216	0.0185	0.6651	0.0179	SB					SMAENSIPL	9	47.5481	18.44	0.8983	0.0104	0.7306	0.0095
SMRNTSVM	8	42.9669	1883.36	0.145	0.6996	0.3031	0.5694	WB					KAFTHGVAM	9	47.3459	336.37	0.6298	0.0553	0.4623	0.1264
GSLSNHTEL	9	44.9672	13.16	0.9757	0.0025	0.7618	0.0084	SB					AAVENLPTF	9	45.2011	26.62	0.9489	0.0052	0.6967	0.0125
TAAHAADSTL	10	42.9613	17549.7	0.0173	4.8936	0.0968	7.7901	WB					FALVNGNNI	9	42.5608	4.56	0.9796	0.0021	0.8598	0.0049
SAPANPSSNI	10	42.9629	58.25	0.8648	0.0138	0.6243	0.0291	SB					TALENLSTL	9	51.5291	5.7	0.9937	0.0006	0.8391	0.0056
GGHVNLTML	9	47.1121	148	0.7482	0.0299	0.5381	0.0618	SB					ASLTLNETI	9	44.7497	240.38	0.6671	0.0467	0.4933	0.0952
KAPVDDVTL	9	47.97	578.16	0.7162	0.0372	0.4122	0.2089	SB					SSNLSLDIL	9	44.8952	905.75	0.4278	0.1495	0.3707	0.2928
AVLTNPETL	9	49.5393	19.61	0.9738	0.0027	0.725	0.0097	SB					SQITSLVTL	9	64.2853	83.33	0.8846	0.0118	0.5912	0.0376
GSLVNQNLL	9	48.787	32.19	0.9192	0.0083	0.6791	0.015	SB					YAIALINAL	9	42.9674	74.04	0.7815	0.0235	0.6022	0.0348
SIHGVGELM	9	41.134	16544.9	0.0304	3.1526	0.1022	7.0174	WB					QMGVNPTSI	9	45.0431	271.89	0.5873	0.0677	0.4819	0.1066
RAIDNAADL	9	49.176	62.56	0.8586	0.0145	0.6177	0.0307	SB					SSLQNLTSL	9	58.8038	4.6	0.9946	0.0005	0.859	0.0049
GIENIHYL	8	53.7893	2140.63	0.2987	0.2834	0.2912	0.6403	SB					AGNINQSLM	9	45.2443	169.67	0.704	0.04	0.5255	0.0677
SSPSNLQII	9	44.8679	11.5	0.9813	0.0019	0.7743	0.0079	SB					TGTTNPFLL	9	50.3333	624.15	0.5474	0.0869	0.4051	0.2221
ALIQNADTL	9	49.577	21.23	0.9335	0.0068	0.7176	0.0099	SB					SGLLNPYSL	9	47.33	24.59	0.9592	0.0042	0.704	0.0115
KSNVNIGNL	9	44.7307	466.76	0.561	0.0776	0.432	0.179	SB					STVFNPSVL	9	45.815	123.52	0.8236	0.0183	0.5549	0.0511
VGVNNPVFL	9	51.7577	38.09	0.9188	0.0083	0.6636	0.0182	SB					VMVTNVTSL	9	52.5134	16.33	0.936	0.0065	0.7418	0.0091
AMPINKATI	9	47.9816	30.61	0.8948	0.0108	0.6838	0.0143	SB					AAPPPGIVEI	10	48.2553	4697.42	0.302	0.2798	0.2186	1.3527
KATINIDAI	9	47.9164	8.86	0.9504	0.0051	0.7983	0.0071	SB					GSPVNTQDF	9	65.2401	1027.2	0.4849	0.1139	0.3591	0.3291
NVLSKADVI	9	51.7904	7182.73	0.0705	1.4931	0.1793	2.1696	WB					GSPMNTTQL	9	49.0158	69.83	0.934	0.0068	0.6076	0.0334
SAVENVVKL	9	46.9416	12.65	0.9857	0.0015	0.7655	0.0082	SB					VPVSNQSSM	9	44.9803	3875.86	0.2012	0.4781	0.2364	1.1271
GSLRNVLSL	9	53.0051	32.08	0.9206	0.0081	0.6795	0.0149	SB					TASFSTTHL	9	44.7702	6612	0.1439	0.7068	0.187	1.9597
FLQNSTHL	8	47.1871	3828.72	0.1825	0.5459	0.2375	1.1144	WB					FSVQNEAGL	9	42.9526	96.39	0.7573	0.0278	0.5778	0.0417
ESPINVTTV	9	43.0862	139.18	0.8232	0.0183	0.5438	0.0587	SB					SSVQNGIML	9	46.4823	23.01	0.9549	0.0046	0.7102	0.0107
EAVVNTVDI	9	40.9418	542.24	0.3602	0.2141	0.4181	0.1984	SB					YALTNIQAA	9	45.0227	34.49	0.7778	0.024	0.6728	0.0163
NSVINVSNL	9	47.2404	62.16	0.85	0.0154	0.6183	0.0305	SB					SSTTNIDDL	9	42.9638	41.83	0.8786	0.0124	0.6549	0.02
ASQANKDLL	9	52.6088	98.19	0.8516	0.0152	0.5761	0.0424	SB					YALKSLTGL	9	40.6918	451.64	0.5704	0.0737	0.435	0.1745
SGLLNQQSL	9	50.2672	23.64	0.9592	0.0042	0.7077	0.011	SB					SGIIDSDFL	9	44.8089	51.21	0.7962	0.0215	0.6362	0.0264
DALTNLTVL	9	45.7312	122.95	0.7542	0.0285	0.5553	0.0508	SB					KVAVNDAHL	9	44.9769	603.62	0.5247	0.0961	0.4082	0.2163
TLGINDTLI	9	43.5425	2005.16	0.1789	0.561	0.2973	0.5991	WB					ASVLNVNHI	9	53.4074	10.35	0.9707	0.003	0.784	0.0076
KAVSNINTL	9	40.9616	6.59	0.9916	0.0009	0.8258	0.0061	SB					SNVTNATNF	9	53.2401	711.54	0.4494	0.1344	0.393	0.2446
AMPSNSPVAA	10	42.9525	3584.96	0.0815	1.2873	0.2436	1.0537	WB					FGGSNPFEI	9	44.0309	136.83	0.7054	0.0397	0.5454	0.0576
SALVSSLHM	9	41.2295	78.62	0.8206	0.0186	0.5966	0.0362	SB					AIMPNGDHI	9	46.7512	48.39	0.8682	0.0135	0.6415	0.0253
VSSINQEAL	9	42.7563	55.53	0.8892	0.0113	0.6287	0.0281	SB					YSGVNVTDL	9	49.0222	27.7	0.8979	0.0104	0.693	0.0131
RSGVNSELV	9	41.195	93.68	0.6906	0.0424	0.5804	0.0407	SB					TGLLNDSTF	9	41.0785	267.27	0.6188	0.0585	0.4835	0.105
KELNWASI	8	42.9674	15168	0.0133	5.8611	0.1102	6.0926	WB					FSVVNPASF	9	42.7049	41.16	0.8447	0.016	0.6564	0.0197
ASNVSKELL	9	44.9888	3102.96	0.2814	0.3036	0.2569	0.9105	SB					TGYLNTVTV	9	40.4597	49.94	0.8546	0.0149	0.6385	0.0259
VTVVNSQTL	9	45.1153	27.61	0.9462	0.0055	0.6933	0.013	SB					ILQNHTEI	8	47.9982	5820.56	0.0689	1.5238	0.1988	1.7064
GAPINKYVV	9	41.1189	59.97	0.8835	0.0119	0.6216	0.0297	SB					AVVANSFFI	9	45.4579	54.62	0.6548	0.0489	0.6303	0.0278
LGPKNGVYI	9	45.3823	21.24	0.9309	0.0071	0.7176	0.0099	SB					GSLNNTLHL	9	64.1507	56.67	0.9089	0.0093	0.6269	0.0285
SMAENSIPL	9	47.5481	18.44	0.8983	0.0104	0.7306	0.0095	SB					AQLPNDVVL	9	53.3075	171.73	0.8748	0.0128	0.5244	0.0683
KAFTHGVAM	9	47.3459	336.37	0.6298	0.0553	0.4623	0.1264	SB					INVPNAEVL	9	47.2032	294.96	0.6741	0.0454	0.4744	0.114
AAVENLPTF	9	45.2011	26.62	0.9489	0.0052	0.6967	0.0125	SB					GQAESLDHL	9	44.5312	4578.15	0.2315	0.3937	0.221	1.3188
ATVGPISVAM	10	42.8645	18228.4	0.0193	4.504	0.0933	8.3202	WB					ASLTSRTSM	9	49.5822	484.88	0.5786	0.0703	0.4285	0.1839
FALVNGNNI	9	42.5608	4.56	0.9796	0.0021	0.8598	0.0049	SB					AQITGTEHL	9	64.0417	487.33	0.7045	0.0399	0.428	0.1845
TALENLSTL	9	51.5291	5.7	0.9937	0.0006	0.8391	0.0056	SB					AALQNLVKI	9	51.1192	8.25	0.9843	0.0016	0.805	0.0068
ASLTLNETI	9	44.7497	240.38	0.6671	0.0467	0.4933	0.0952	SB					AAPFDTVHI	9	50.0967	395.6	0.697	0.0413	0.4473	0.1494
SSNLSLDIL	9	44.8952	905.75	0.4278	0.1495	0.3707	0.2928	SB					FQAINAGHI	9	44.4299	85.85	0.6482	0.0501	0.5885	0.0383
SQITSLVTL	9	64.2853	83.33	0.8846	0.0118	0.5912	0.0376	SB					NAQRNALAI	9	47.3892	337.25	0.4986	0.107	0.462	0.1268
LSTAGTVVTI	10	41.0529	19188.5	0.0055	10.4793	0.0885	9.1767	WB					GAIENAFHL	9	45.3343	11.81	0.9768	0.0024	0.7718	0.008
YAIALINAL	9	42.9674	74.04	0.7815	0.0235	0.6022	0.0348	SB					HGLVNPTSF	9	47.8977	298.18	0.7277	0.0346	0.4734	0.115
QMGVNPTSI	9	45.0431	271.89	0.5873	0.0677	0.4819	0.1066	SB					GVVRNNEAL	9	40.817	514.86	0.5459	0.0882	0.4229	0.1917
TLINEEML	8	64.7625	11685.4	0.0463	2.2297	0.1344	4.079	WB					GANVNQRDV	9	48.0727	4350.45	0.1222	0.8524	0.2257	1.2552
SSLQNLTSL	9	58.8038	4.6	0.9946	0.0005	0.859	0.0049	SB					ALVENSQVI	9	42.9624	271.54	0.6624	0.0475	0.482	0.1065
AGNINQSLM	9	45.2443	169.67	0.704	0.04	0.5255	0.0677	SB					VQIANPAFI	9	51.246	12.63	0.9378	0.0064	0.7656	0.0082
TGTTNPFLL	9	50.3333	624.15	0.5474	0.0869	0.4051	0.2221	SB					ITVKNPAVM	9	49.542	139.46	0.7699	0.025	0.5436	0.0588
SGLLNPYSL	9	47.33	24.59	0.9592	0.0042	0.704	0.0115	SB					IQIANVTTL	9	50.6589	9.74	0.9796	0.0021	0.7896	0.0074
STVFNPSVL	9	45.815	123.52	0.8236	0.0183	0.5549	0.0511	SB					FSFGNTSTL	9	40.8046	14.2	0.9618	0.0039	0.7548	0.0086
VMVTNVTSL	9	52.5134	16.33	0.936	0.0065	0.7418	0.0091	SB					SSPLNDDLL	9	60.9261	17.08	0.9456	0.0056	0.7377	0.0092
AAPPPGIVEI	10	48.2553	4697.42	0.302	0.2798	0.2186	1.3527	SB					YQGPGIPEL	9	45.2652	5029.33	0.3385	0.2395	0.2123	1.4482
GSPVNTQDF	9	65.2401	1027.2	0.4849	0.1139	0.3591	0.3291	SB					IAIVNYANLNGSPL	14	39.5131	74.25	0.1378	0.7461	0.6019	0.0348
GSPMNTTQL	9	49.0158	69.83	0.934	0.0068	0.6076	0.0334	SB					IGPDNLVFV	9	46.8814	187.07	0.6835	0.0437	0.5165	0.0737
VPVSNQSSM	9	44.9803	3875.86	0.2012	0.4781	0.2364	1.1271	SB					AQLPLADFV	9	48.4558	1024.66	0.3901	0.1828	0.3593	0.3283
TASFSTTHL	9	44.7702	6612	0.1439	0.7068	0.187	1.9597	WB					LSLENIATL	9	40.8652	10.8	0.9769	0.0024	0.7801	0.0077
FSVQNEAGL	9	42.9526	96.39	0.7573	0.0278	0.5778	0.0417	SB					IAVINALFL	9	45.1101	12.87	0.9212	0.0081	0.7638	0.0083
SSVQNGIML	9	46.4823	23.01	0.9549	0.0046	0.7102	0.0107	SB					SAPENAVRM	9	51.7167	13.58	0.9839	0.0016	0.7589	0.0085
YALTNIQAA	9	45.0227	34.49	0.7778	0.024	0.6728	0.0163	SB					ASLTNNQNL	9	64.1948	37.12	0.9475	0.0054	0.666	0.0177
SSTTNIDDL	9	42.9638	41.83	0.8786	0.0124	0.6549	0.02	SB					AIMENANVL	9	39.275	117.21	0.7901	0.0223	0.5597	0.0487
YALKSLTGL	9	40.6918	451.64	0.5704	0.0737	0.435	0.1745	SB					AALENDKTI	9	47.373	34.01	0.9357	0.0066	0.6741	0.016
SGIIDSDFL	9	44.8089	51.21	0.7962	0.0215	0.6362	0.0264	SB					ATLENVTNL	9	46.9355	52.13	0.9335	0.0068	0.6346	0.0268
KVAVNDAHL	9	44.9769	603.62	0.5247	0.0961	0.4082	0.2163	SB					STVRNADVI	9	53.0751	9.18	0.9495	0.0052	0.7951	0.0072
ASVLNVNHI	9	53.4074	10.35	0.9707	0.003	0.784	0.0076	SB					KSVINTTLV	9	45.8817	25.62	0.8865	0.0116	0.7002	0.0121
SNVTNATNF	9	53.2401	711.54	0.4494	0.1344	0.393	0.2446	SB					NANTNTEVL	9	47.1764	59.64	0.8774	0.0126	0.6221	0.0296
FGGSNPFEI	9	44.0309	136.83	0.7054	0.0397	0.5454	0.0576	SB					TSVQNVSQI	9	47.2801	26.98	0.9403	0.0061	0.6955	0.0127
AIMPNGDHI	9	46.7512	48.39	0.8682	0.0135	0.6415	0.0253	SB					YSLPNAPTL	9	49.1804	7.77	0.9911	0.0009	0.8106	0.0066
YSGVNVTDL	9	49.0222	27.7	0.8979	0.0104	0.693	0.0131	SB					AATFNPELI	9	60.1402	61.73	0.8481	0.0156	0.619	0.0304
TGLLNDSTF	9	41.0785	267.27	0.6188	0.0585	0.4835	0.105	SB					VMKANNSVI	9	64.1082	553.29	0.3642	0.2094	0.4163	0.2013
FSVVNPASF	9	42.7049	41.16	0.8447	0.016	0.6564	0.0197	SB					SSVLNLTEL	9	52.7704	5.4	0.9912	0.0009	0.8441	0.0055
TGYLNTVTV	9	40.4597	49.94	0.8546	0.0149	0.6385	0.0259	SB					SVISNIVLM	9	43.1413	20.49	0.94	0.0061	0.7209	0.0098
ILQNHTEI	8	47.9982	5820.56	0.0689	1.5238	0.1988	1.7064	WB					SQISNGSHM	9	46.9163	17.96	0.9552	0.0046	0.7331	0.0094
AVVANSFFI	9	45.4579	54.62	0.6548	0.0489	0.6303	0.0278	SB					SSPATGKDTL	10	45.0036	1378.05	0.4922	0.1103	0.3319	0.4303
GSLNNTLHL	9	64.1507	56.67	0.9089	0.0093	0.6269	0.0285	SB					FVQNQEVL	8	61.4019	4168.4	0.1576	0.6482	0.2296	1.2031
AQLPNDVVL	9	53.3075	171.73	0.8748	0.0128	0.5244	0.0683	SB					AAMKNVTEL	9	52.6591	4.33	0.9948	0.0005	0.8645	0.0048
INVPNAEVL	9	47.2032	294.96	0.6741	0.0454	0.4744	0.114	SB					VALSNMNVI	9	50.0164	5.32	0.9818	0.0019	0.8455	0.0054
GQAESLDHL	9	44.5312	4578.15	0.2315	0.3937	0.221	1.3188	SB					FGVLNVQTV	9	49.9251	22.44	0.8961	0.0106	0.7125	0.0104
ASLTSRTSM	9	49.5822	484.88	0.5786	0.0703	0.4285	0.1839	SB					ISPFNKSAL	9	41.0086	115.5	0.8534	0.015	0.5611	0.0482
AQITGTEHL	9	64.0417	487.33	0.7045	0.0399	0.428	0.1845	SB					VSVENGMII	9	42.9648	72.2	0.7966	0.0215	0.6045	0.0342
AALQNLVKI	9	51.1192	8.25	0.9843	0.0016	0.805	0.0068	SB					ASYVNLPTI	9	41.5109	7.09	0.977	0.0024	0.8189	0.0064
AAPFDTVHI	9	50.0967	395.6	0.697	0.0413	0.4473	0.1494	SB					SAPYGRITL	9	46.1747	320.5	0.773	0.0246	0.4667	0.1215
FQAINAGHI	9	44.4299	85.85	0.6482	0.0501	0.5885	0.0383	SB					KSISNTSKL	9	47.3532	34.66	0.9469	0.0054	0.6723	0.0164
NAQRNALAI	9	47.3892	337.25	0.4986	0.107	0.462	0.1268	SB					AALVSRTFL	9	49.0013	79.42	0.7697	0.025	0.5957	0.0365
ISENGPLKI	9	45.0415	27883.5	0.0095	7.3561	0.054	20.2265	WB					GAVYNLENV	9	53.2543	70.2	0.7116	0.0383	0.6071	0.0335
GAIENAFHL	9	45.3343	11.81	0.9768	0.0024	0.7718	0.008	SB					SGLQNFEAL	9	50.6527	7.63	0.981	0.0019	0.8122	0.0066
HGLVNPTSF	9	47.8977	298.18	0.7277	0.0346	0.4734	0.115	SB					ASRANPYSI	9	44.9687	652.46	0.5211	0.0973	0.401	0.2297
LEQQNQVL	8	47.9497	32143.1	0.005	11.0175	0.0408	29.0095	WB					YAIVGLETI	9	49.8486	9.62	0.9571	0.0044	0.7908	0.0073
GVVRNNEAL	9	40.817	514.86	0.5459	0.0882	0.4229	0.1917	SB					ASPEGQDYL	9	47.9658	196.58	0.8281	0.0178	0.5119	0.0776
LAQRLAGNEQVTR	13	61.4758	41633.7	0	76.3636	0.0169	66.4697	WB					SMGVNDIDI	9	51.099	219.51	0.384	0.1888	0.5017	0.0869
GANVNQRDV	9	48.0727	4350.45	0.1222	0.8524	0.2257	1.2552	WB					SGNFNVDNI	9	48.0478	65.88	0.7243	0.0354	0.6129	0.0319
ALVENSQVI	9	42.9624	271.54	0.6624	0.0475	0.482	0.1065	SB					TIGFNVETV	9	54.0336	1640.4	0.2304	0.3957	0.3158	0.5039
VQIANPAFI	9	51.246	12.63	0.9378	0.0064	0.7656	0.0082	SB					ISLHNPVSI	9	43.7565	26.15	0.9379	0.0063	0.6984	0.0123
ITVKNPAVM	9	49.542	139.46	0.7699	0.025	0.5436	0.0588	SB					LHLTNLGVL	9	41.0122	2222.74	0.1225	0.8508	0.2877	0.6642
IQIANVTTL	9	50.6589	9.74	0.9796	0.0021	0.7896	0.0074	SB					LSHINVALI	9	41.0101	51.98	0.68	0.0443	0.6348	0.0267
TAATFGTASM	10	42.7951	9339.51	0.0375	2.6622	0.1551	2.996	WB					AAMSNPRAM	9	44.3395	34.2	0.9179	0.0084	0.6735	0.0162
FSFGNTSTL	9	40.8046	14.2	0.9618	0.0039	0.7548	0.0086	SB					SAIMDSDLL	9	52.1728	27.34	0.8793	0.0124	0.6942	0.0129
SSPLNDDLL	9	60.9261	17.08	0.9456	0.0056	0.7377	0.0092	SB					SSSTGKDWI	9	49.1382	3504.04	0.1275	0.8145	0.2457	1.0333
YQGPGIPEL	9	45.2652	5029.33	0.3385	0.2395	0.2123	1.4482	SB					SALTLFSEL	9	45.034	78.3	0.829	0.0177	0.597	0.0361
LGGNEQVTR	9	61.4173	42683.7	0.0003	42.3684	0.0146	72.5739	WB					GSVSNIYKL	9	42.966	103.69	0.8439	0.0161	0.571	0.0443
IAIVNYANLNGSPL	14	39.5131	74.25	0.1378	0.7461	0.6019	0.0348	WB					GTINNLIHV	9	42.9461	294.86	0.6011	0.0636	0.4744	0.114
IGPDNLVFV	9	46.8814	187.07	0.6835	0.0437	0.5165	0.0737	SB					SAIHILDVL	9	42.9597	49.53	0.8747	0.0128	0.6393	0.0257
AQLPLADFV	9	48.4558	1024.66	0.3901	0.1828	0.3593	0.3283	SB					ASLVSQDYV	9	53.0751	39.68	0.7871	0.0227	0.6598	0.019
LSLENIATL	9	40.8652	10.8	0.9769	0.0024	0.7801	0.0077	SB					SGPINFTVF	9	40.9723	29.39	0.9129	0.0089	0.6875	0.0138
IAVINALFL	9	45.1101	12.87	0.9212	0.0081	0.7638	0.0083	SB					AALENTHLL	9	51.606	7.95	0.9914	0.0009	0.8084	0.0067
SAPENAVRM	9	51.7167	13.58	0.9839	0.0016	0.7589	0.0085	SB					AAPDVVVPTL	10	43.7421	3294.4	0.3478	0.2286	0.2514	0.9741
ASLTNNQNL	9	64.1948	37.12	0.9475	0.0054	0.666	0.0177	SB					FAFESVVAI	9	43.5658	176.61	0.6365	0.0534	0.5218	0.0695
AIMENANVL	9	39.275	117.21	0.7901	0.0223	0.5597	0.0487	SB					SSVRGNHII	9	50.5622	2155.29	0.2799	0.3063	0.2906	0.6446
GNVECLNLL	9	52.9001	17783.5	0.0143	5.5777	0.0955	7.9709	WB					TGPPNTSYM	9	48.5037	28.03	0.9535	0.0048	0.6919	0.0132
AALENDKTI	9	47.373	34.01	0.9357	0.0066	0.6741	0.016	SB					SSEINSAYL	9	41.0189	33.79	0.8889	0.0114	0.6747	0.0159
ATLENVTNL	9	46.9355	52.13	0.9335	0.0068	0.6346	0.0268	SB					SAHSNINQI	9	51.499	13.99	0.972	0.0029	0.7562	0.0086
STVRNADVI	9	53.0751	9.18	0.9495	0.0052	0.7951	0.0072	SB					FSPTNPAHL	9	40.9334	18.3	0.9741	0.0026	0.7313	0.0094
KSVINTTLV	9	45.8817	25.62	0.8865	0.0116	0.7002	0.0121	SB					SVPGNPHYL	9	61.7252	207.5	0.8687	0.0134	0.5069	0.0821
NANTNTEVL	9	47.1764	59.64	0.8774	0.0126	0.6221	0.0296	SB					SIVFNGPHL	9	47.9218	392.6	0.6172	0.0589	0.448	0.1483
TSVQNVSQI	9	47.2801	26.98	0.9403	0.0061	0.6955	0.0127	SB					IAPEDQVVL	9	40.8533	1088.59	0.658	0.0483	0.3537	0.3476
YSLPNAPTL	9	49.1804	7.77	0.9911	0.0009	0.8106	0.0066	SB					SSLHNSLLL	9	45.0854	19.15	0.9476	0.0054	0.7272	0.0096
AATFNPELI	9	60.1402	61.73	0.8481	0.0156	0.619	0.0304	SB					GQFNQDYL	8	43.3114	1541.97	0.3253	0.2545	0.3215	0.4775
VMKANNSVI	9	64.1082	553.29	0.3642	0.2094	0.4163	0.2013	SB					GGITNFDNF	9	54.009	92.3	0.7139	0.0378	0.5818	0.0401
SSVLNLTEL	9	52.7704	5.4	0.9912	0.0009	0.8441	0.0055	SB					SSPTSTEYI	9	40.7631	31.27	0.9232	0.0079	0.6818	0.0146
SVISNIVLM	9	43.1413	20.49	0.94	0.0061	0.7209	0.0098	SB					SSPYSPAYL	9	40.732	270.03	0.7596	0.0273	0.4826	0.106
SQISNGSHM	9	46.9163	17.96	0.9552	0.0046	0.7331	0.0094	SB					SMGISFDVI	9	44.7842	261.05	0.3032	0.2786	0.4857	0.1029
AGFAGDDAPR	10	64.2375	35246.7	0.0003	41.5	0.0323	38.077	WB					VQPRATEAL	9	51.8118	5361.79	0.2806	0.305	0.2064	1.5475
SSPATGKDTL	10	45.0036	1378.05	0.4922	0.1103	0.3319	0.4303	SB					SSPTDKHTL	9	42.96	368.46	0.8538	0.015	0.4538	0.1393
FVQNQEVL	8	61.4019	4168.4	0.1576	0.6482	0.2296	1.2031	WB					VSPAHQYAL	9	55.8523	754.34	0.6006	0.0638	0.3876	0.2555
AAMKNVTEL	9	52.6591	4.33	0.9948	0.0005	0.8645	0.0048	SB					SHLLNTSTL	9	42.9652	145.76	0.6685	0.0464	0.5396	0.0611
VALSNMNVI	9	50.0164	5.32	0.9818	0.0019	0.8455	0.0054	SB					TALENLIVL	9	52.9657	9.33	0.9869	0.0013	0.7936	0.0072
FGVLNVQTV	9	49.9251	22.44	0.8961	0.0106	0.7125	0.0104	SB					FSGSNAEQM	9	45.0557	27.53	0.9202	0.0082	0.6936	0.013
ISPFNKSAL	9	41.0086	115.5	0.8534	0.015	0.5611	0.0482	SB					RALENPDTA	9	56.1677	68.43	0.7898	0.0224	0.6094	0.0329
VSVENGMII	9	42.9648	72.2	0.7966	0.0215	0.6045	0.0342	SB					SQIVNPESI	9	45.1246	6.36	0.989	0.0011	0.8289	0.006
ASYVNLPTI	9	41.5109	7.09	0.977	0.0024	0.8189	0.0064	SB					KALINADEL	9	53.7347	4.74	0.9919	0.0008	0.8562	0.005
SAPYGRITL	9	46.1747	320.5	0.773	0.0246	0.4667	0.1215	SB					SSVLNQLLL	9	45.0142	16.59	0.958	0.0043	0.7404	0.0091
KSISNTSKL	9	47.3532	34.66	0.9469	0.0054	0.6723	0.0164	SB					MAGINTDHL	9	44.4583	14.39	0.9231	0.0079	0.7535	0.0086
AALVSRTFL	9	49.0013	79.42	0.7697	0.025	0.5957	0.0365	SB					AALENPMLL	9	49.954	18.02	0.9794	0.0021	0.7328	0.0094
GAVYNLENV	9	53.2543	70.2	0.7116	0.0383	0.6071	0.0335	SB					RAIELATTL	9	51.7358	121.47	0.8472	0.0157	0.5564	0.05
SGLQNFEAL	9	50.6527	7.63	0.981	0.0019	0.8122	0.0066	SB					GNLGNTHYL	9	64.2413	269.79	0.7342	0.0331	0.4826	0.1059
ASRANPYSI	9	44.9687	652.46	0.5211	0.0973	0.401	0.2297	SB					SAIINEDNL	9	53.1555	5.16	0.9904	0.001	0.8484	0.0053
YAIVGLETI	9	49.8486	9.62	0.9571	0.0044	0.7908	0.0073	SB					SALEDLEVL	9	45.4545	77.67	0.8788	0.0124	0.5977	0.0359
ASPEGQDYL	9	47.9658	196.58	0.8281	0.0178	0.5119	0.0776	SB					AVLTNQETI	9	48.7497	11.52	0.9702	0.003	0.7741	0.0079
SMGVNDIDI	9	51.099	219.51	0.384	0.1888	0.5017	0.0869	SB					SSPKDLTQL	9	48.9405	826.97	0.733	0.0334	0.3791	0.2743
SGNFNVDNI	9	48.0478	65.88	0.7243	0.0354	0.6129	0.0319	SB					AQSINITEL	9	48.7042	76	0.9165	0.0085	0.5997	0.0354
TIGFNVETV	9	54.0336	1640.4	0.2304	0.3957	0.3158	0.5039	SB					RALSNLESV	9	53.1705	6.8	0.9799	0.0021	0.8229	0.0062
ISLHNPVSI	9	43.7565	26.15	0.9379	0.0063	0.6984	0.0123	SB					STIRNADVI	9	53.0536	4.55	0.9834	0.0017	0.8599	0.0049
LHLTNLGVL	9	41.0122	2222.74	0.1225	0.8508	0.2877	0.6642	WB					SRVTNGELL	9	40.7989	1275.29	0.2595	0.3433	0.3391	0.3983
LSHINVALI	9	41.0101	51.98	0.68	0.0443	0.6348	0.0267	SB					GSLVHISYL	9	45.1925	168.24	0.6897	0.0426	0.5263	0.0674
AAMSNPRAM	9	44.3395	34.2	0.9179	0.0084	0.6735	0.0162	SB					KSIKNANTI	9	41.4219	8.14	0.9779	0.0023	0.8063	0.0068
SAIMDSDLL	9	52.1728	27.34	0.8793	0.0124	0.6942	0.0129	SB					AAPISPWTM	9	51.0853	214.73	0.8411	0.0164	0.5037	0.085
SSSTGKDWI	9	49.1382	3504.04	0.1275	0.8145	0.2457	1.0333	WB					AALHNGFYP	9	40.8359	734.4	0.2606	0.3412	0.3901	0.2501
SALTLFSEL	9	45.034	78.3	0.829	0.0177	0.597	0.0361	SB					QSITNLSNL	9	64.1175	27.58	0.9403	0.0061	0.6934	0.013
GSVSNIYKL	9	42.966	103.69	0.8439	0.0161	0.571	0.0443	SB					IVGINLTEM	9	47.9233	233.58	0.6047	0.0626	0.496	0.0925
GTINNLIHV	9	42.9461	294.86	0.6011	0.0636	0.4744	0.114	SB					RALELGTVM	9	45.2118	246.7	0.6939	0.0418	0.4909	0.0977
SAIHILDVL	9	42.9597	49.53	0.8747	0.0128	0.6393	0.0257	SB					TGIRLTESL	9	41.2636	1292.66	0.4219	0.1545	0.3378	0.4035
ASLVSQDYV	9	53.0751	39.68	0.7871	0.0227	0.6598	0.019	SB					SIIAMKTLL	9	40.9042	2505.73	0.219	0.4264	0.2767	0.7448
SGPINFTVF	9	40.9723	29.39	0.9129	0.0089	0.6875	0.0138	SB					THENLTYL	8	42.9604	6135.36	0.1137	0.9167	0.1939	1.803
AALENTHLL	9	51.606	7.95	0.9914	0.0009	0.8084	0.0067	SB					TQAISQETL	9	52.1038	2053.42	0.421	0.1552	0.2951	0.6138
AAPDVVVPTL	10	43.7421	3294.4	0.3478	0.2286	0.2514	0.9741	SB					SAPVNGSVFI	10	42.957	9.49	0.9435	0.0058	0.792	0.0073
FAFESVVAI	9	43.5658	176.61	0.6365	0.0534	0.5218	0.0695	SB					RTLMNLGGL	9	64.2341	696.09	0.289	0.294	0.395	0.2408
SSVRGNHII	9	50.5622	2155.29	0.2799	0.3063	0.2906	0.6446	SB					SAIIFETPL	9	45.5343	50.67	0.7511	0.0292	0.6372	0.0262
TGPPNTSYM	9	48.5037	28.03	0.9535	0.0048	0.6919	0.0132	SB					KGVFNVEVV	9	46.6012	50.9	0.7587	0.0275	0.6368	0.0263
SSEINSAYL	9	41.0189	33.79	0.8889	0.0114	0.6747	0.0159	SB					SALALVNRF	9	42.2991	3310.44	0.2245	0.4102	0.2509	0.9792
SAHSNINQI	9	51.499	13.99	0.972	0.0029	0.7562	0.0086	SB					SGPDLSTALM	10	50.4428	4118.9	0.1623	0.6289	0.2307	1.1903
FSPTNPAHL	9	40.9334	18.3	0.9741	0.0026	0.7313	0.0094	SB					GMVVDVENL	9	53.0024	2321.8	0.2016	0.477	0.2837	0.6919
SVPGNPHYL	9	61.7252	207.5	0.8687	0.0134	0.5069	0.0821	SB					GSIYNPEVL	9	49.9206	19.85	0.9622	0.0039	0.7238	0.0097
SIVFNGPHL	9	47.9218	392.6	0.6172	0.0589	0.448	0.1483	SB					AMLTNLESL	9	51.8121	9.97	0.9663	0.0034	0.7874	0.0075
IAPEDQVVL	9	40.8533	1088.59	0.658	0.0483	0.3537	0.3476	SB					SALNNFQVV	9	51.6936	6.71	0.9779	0.0023	0.8241	0.0062
SSLHNSLLL	9	45.0854	19.15	0.9476	0.0054	0.7272	0.0096	SB					SALRMADVI	9	53.2826	17.25	0.8499	0.0154	0.7368	0.0092
GQFNQDYL	8	43.3114	1541.97	0.3253	0.2545	0.3215	0.4775	SB					GSHTNIHLL	9	40.7567	59.81	0.9153	0.0087	0.6219	0.0297
GGITNFDNF	9	54.009	92.3	0.7139	0.0378	0.5818	0.0401	SB					FAQEALTVL	9	42.1627	1624.6	0.3902	0.1827	0.3167	0.4994
SSPTSTEYI	9	40.7631	31.27	0.9232	0.0079	0.6818	0.0146	SB					VAVKNSGGFL	10	52.327	476.67	0.332	0.247	0.43	0.1817
SSPYSPAYL	9	40.732	270.03	0.7596	0.0273	0.4826	0.106	SB					ALVSNLYVI	9	45.9435	88.43	0.6739	0.0454	0.5857	0.0391
SMGISFDVI	9	44.7842	261.05	0.3032	0.2786	0.4857	0.1029	SB					AGPSNFGTEL	10	42.4412	94.4	0.8441	0.016	0.5797	0.041
YGVSNFKIG	9	48.0502	5232.21	0.0159	5.207	0.2086	1.5079	WB					TGIANIAWM	9	42.9572	15.79	0.8753	0.0128	0.7449	0.0089
VQPRATEAL	9	51.8118	5361.79	0.2806	0.305	0.2064	1.5475	SB					RASTNAMLI	9	48.2661	152.97	0.6167	0.0591	0.5351	0.0632
SSPTDKHTL	9	42.96	368.46	0.8538	0.015	0.4538	0.1393	SB					FGIIDVTEV	9	43.7112	343.27	0.4608	0.1264	0.4604	0.1293
VSPAHQYAL	9	55.8523	754.34	0.6006	0.0638	0.3876	0.2555	SB					TGAKNLYII	9	44.8188	203.62	0.6082	0.0616	0.5087	0.0804
LASHLNLAM	9	45.2565	13412.4	0.0193	4.5012	0.1216	5.0185	WB					YGLKNLTAL	9	51.6094	7.95	0.9799	0.0021	0.8084	0.0067
SHLLNTSTL	9	42.9652	145.76	0.6685	0.0464	0.5396	0.0611	SB					YAPVGILFL	9	45.1643	97.14	0.8454	0.0159	0.5771	0.042
TALENLIVL	9	52.9657	9.33	0.9869	0.0013	0.7936	0.0072	SB					GMIENGPFL	9	47.311	68.5	0.8132	0.0194	0.6093	0.0329
FSGSNAEQM	9	45.0557	27.53	0.9202	0.0082	0.6936	0.013	SB					AGIYNLDDL	9	64.1883	21.21	0.8677	0.0136	0.7177	0.0099
RALENPDTA	9	56.1677	68.43	0.7898	0.0224	0.6094	0.0329	SB					SGPTIQDYL	9	42.966	74.71	0.8921	0.011	0.6013	0.035
SQIVNPESI	9	45.1246	6.36	0.989	0.0011	0.8289	0.006	SB					MGILNTDTL	9	45.8854	4.85	0.9822	0.0018	0.8541	0.0051
KALINADEL	9	53.7347	4.74	0.9919	0.0008	0.8562	0.005	SB					MPGVNIAYL	9	49.1003	1270.2	0.2093	0.4545	0.3395	0.3971
SSVLNQLLL	9	45.0142	16.59	0.958	0.0043	0.7404	0.0091	SB					SAVVDKDFL	9	61.6821	43.66	0.8481	0.0156	0.651	0.0216
MAGINTDHL	9	44.4583	14.39	0.9231	0.0079	0.7535	0.0086	SB					GMLRSLSTL	9	65.0429	669.87	0.3764	0.1961	0.3986	0.2342
TTVTTTSYN	9	46.2713	29103.9	0.0003	39.5	0.05	22.4582	WB					SLMPAAEEM	9	50.6571	3151.72	0.2236	0.4129	0.2555	0.9271
AALENPMLL	9	49.954	18.02	0.9794	0.0021	0.7328	0.0094	SB					SMVLNSQSL	9	50.1787	20.25	0.9322	0.0069	0.722	0.0098
LAGNEQVTR	9	59.6033	41335.6	0.0004	36.5484	0.0176	64.7692	WB					ANTTNLTFL	9	41.9123	199.84	0.6692	0.0463	0.5104	0.0789
RAIELATTL	9	51.7358	121.47	0.8472	0.0157	0.5564	0.05	SB					SAPQTLHQI	9	41.0179	263.28	0.8454	0.0159	0.4849	0.1037
GNLGNTHYL	9	64.2413	269.79	0.7342	0.0331	0.4826	0.1059	SB					YSLTLVDAL	9	51.6353	28.12	0.8659	0.0137	0.6916	0.0133
SAIINEDNL	9	53.1555	5.16	0.9904	0.001	0.8484	0.0053	SB					QAVLNLHSI	9	42.9657	17.19	0.948	0.0053	0.7371	0.0092
SALEDLEVL	9	45.4545	77.67	0.8788	0.0124	0.5977	0.0359	SB					TSTTNPEFV	9	42.9516	98.06	0.7667	0.0257	0.5762	0.0423
AVLTNQETI	9	48.7497	11.52	0.9702	0.003	0.7741	0.0079	SB					SAPTARVFM	9	47.2006	135.88	0.779	0.0238	0.546	0.0572
SSPKDLTQL	9	48.9405	826.97	0.733	0.0334	0.3791	0.2743	SB					STISNDVFI	9	49.8752	11.2	0.9423	0.0059	0.7767	0.0078
AQSINITEL	9	48.7042	76	0.9165	0.0085	0.5997	0.0354	SB					SAISNLDYI	9	57.2631	1.79	0.9986	0.0001	0.946	0.0019
RALSNLESV	9	53.1705	6.8	0.9799	0.0021	0.8229	0.0062	SB					KVVNPYYL	8	64.7851	4600.45	0.176	0.5729	0.2205	1.3252
STIRNADVI	9	53.0536	4.55	0.9834	0.0017	0.8599	0.0049	SB					RSLLLLAPL	9	48.603	143.12	0.374	0.1984	0.5412	0.0603
SRVTNGELL	9	40.7989	1275.29	0.2595	0.3433	0.3391	0.3983	SB					FQAMNKEL	8	44.7944	4679.82	0.1392	0.7369	0.2189	1.3477
GSLVHISYL	9	45.1925	168.24	0.6897	0.0426	0.5263	0.0674	SB					FALYNAANL	9	41.0844	8.4	0.9389	0.0062	0.8033	0.0069
KSIKNANTI	9	41.4219	8.14	0.9779	0.0023	0.8063	0.0068	SB					AQPVNVQQL	9	47.2296	117.93	0.9231	0.0079	0.5591	0.049
AAPISPWTM	9	51.0853	214.73	0.8411	0.0164	0.5037	0.085	SB					NSPRNLAMEATYI	13	44.3359	268.24	0.208	0.4582	0.4832	0.1054
VTGPGELWM	9	40.7273	23096.1	0.0096	7.2957	0.0714	13.1866	WB					SLLTNADYT	9	47.5835	476.67	0.1815	0.5502	0.43	0.1817
AALHNGFYP	9	40.8359	734.4	0.2606	0.3412	0.3901	0.2501	SB					TAVVNVTYM	9	54.4554	4.21	0.9891	0.0011	0.8671	0.0047
QSITNLSNL	9	64.1175	27.58	0.9403	0.0061	0.6934	0.013	SB					SFFVNGLTL	9	45.6322	227.71	0.551	0.0837	0.4983	0.0901
IVGINLTEM	9	47.9233	233.58	0.6047	0.0626	0.496	0.0925	SB					SAIANIPAAAV	11	46.8007	40.52	0.7046	0.0399	0.6579	0.0194
RALELGTVM	9	45.2118	246.7	0.6939	0.0418	0.4909	0.0977	SB					SLLTNHVTL	9	45.7241	20.88	0.9482	0.0053	0.7191	0.0099
TGIRLTESL	9	41.2636	1292.66	0.4219	0.1545	0.3378	0.4035	SB					VQVPNLESL	9	48.6666	54.14	0.9353	0.0066	0.6311	0.0276
SIIAMKTLL	9	40.9042	2505.73	0.219	0.4264	0.2767	0.7448	SB					QAPQNKITV	9	45.8834	50.58	0.9498	0.0051	0.6374	0.0262
THENLTYL	8	42.9604	6135.36	0.1137	0.9167	0.1939	1.803	WB					LALVNDQLL	9	50.0962	33.96	0.8686	0.0135	0.6742	0.016
TQAISQETL	9	52.1038	2053.42	0.421	0.1552	0.2951	0.6138	SB					SAPSAGSLYM	10	42.9554	371.08	0.5807	0.0696	0.4532	0.1403
SAPVNGSVFI	10	42.957	9.49	0.9435	0.0058	0.792	0.0073	SB					SSPSSSPTHL	10	45.2238	1946.21	0.4933	0.1097	0.3	0.5849
RTLMNLGGL	9	64.2341	696.09	0.289	0.294	0.395	0.2408	SB					YAVTGDVKM	9	45.9522	897.81	0.4503	0.1338	0.3715	0.291
SAIIFETPL	9	45.5343	50.67	0.7511	0.0292	0.6372	0.0262	SB					ASFFNISTL	9	40.9405	12.44	0.9689	0.0032	0.767	0.0082
KGVFNVEVV	9	46.6012	50.9	0.7587	0.0275	0.6368	0.0263	SB					NALENINVI	9	48.225	18.47	0.9368	0.0065	0.7305	0.0095
SALALVNRF	9	42.2991	3310.44	0.2245	0.4102	0.2509	0.9792	SB					GQVINLDQL	9	48.9496	65.88	0.851	0.0153	0.6129	0.0319
SGPDLSTALM	10	50.4428	4118.9	0.1623	0.6289	0.2307	1.1903	WB					AALQNLEQL	9	52.8986	4.66	0.9959	0.0004	0.8577	0.005
GMVVDVENL	9	53.0024	2321.8	0.2016	0.477	0.2837	0.6919	SB					VSIQNLVKV	9	42.9569	22.56	0.9481	0.0053	0.712	0.0104
GSIYNPEVL	9	49.9206	19.85	0.9622	0.0039	0.7238	0.0097	SB					SGIHLTIEM	9	41.7061	1135.95	0.423	0.1535	0.3498	0.3613
AMLTNLESL	9	51.8121	9.97	0.9663	0.0034	0.7874	0.0075	SB					AALQNLEEL	9	61.038	3.52	0.9972	0.0003	0.8836	0.0041
SALNNFQVV	9	51.6936	6.71	0.9779	0.0023	0.8241	0.0062	SB					SSIEHLTTL	9	41.3162	42.36	0.9363	0.0065	0.6538	0.0205
SALRMADVI	9	53.2826	17.25	0.8499	0.0154	0.7368	0.0092	SB					ASVLNTDPAL	10	42.9546	22.05	0.7832	0.0232	0.7141	0.0101
GSHTNIHLL	9	40.7567	59.81	0.9153	0.0087	0.6219	0.0297	SB					GAVKNAQEAL	10	41.0374	335.3	0.6299	0.0553	0.4626	0.126
FAQEALTVL	9	42.1627	1624.6	0.3902	0.1827	0.3167	0.4994	SB					SAVKNLQQL	9	52.8367	9.64	0.9897	0.0011	0.7906	0.0073
TGMLIGLSAI	10	42.4547	5668.42	0.014	5.6706	0.2012	1.6502	WB					AAVLNPRFL	9	47.7112	34.96	0.9326	0.0069	0.6715	0.0166
VAVKNSGGFL	10	52.327	476.67	0.332	0.247	0.43	0.1817	SB					VTLANKELL	9	48.2272	66.74	0.8675	0.0136	0.6118	0.0323
ALVSNLYVI	9	45.9435	88.43	0.6739	0.0454	0.5857	0.0391	SB					FAHFNSHAA	9	53.8992	243.7	0.4118	0.1632	0.492	0.0965
AGPSNFGTEL	10	42.4412	94.4	0.8441	0.016	0.5797	0.041	SB					SSPTHTATSI	10	44.6035	1072.71	0.4069	0.1675	0.3551	0.3429
TGIANIAWM	9	42.9572	15.79	0.8753	0.0128	0.7449	0.0089	SB					SSYINASFI	9	42.9674	6.67	0.9434	0.0058	0.8245	0.0062
RASTNAMLI	9	48.2661	152.97	0.6167	0.0591	0.5351	0.0632	SB					QAPINAQML	9	47.9292	70.86	0.9247	0.0077	0.6062	0.0337
FGIIDVTEV	9	43.7112	343.27	0.4608	0.1264	0.4604	0.1293	SB					AAVNNVEATL	10	64.0808	31.02	0.9251	0.0077	0.6826	0.0145
TGAKNLYII	9	44.8188	203.62	0.6082	0.0616	0.5087	0.0804	SB					SAPVAAEPFL	10	44.6871	305.83	0.4754	0.1187	0.4711	0.1173
YGLKNLTAL	9	51.6094	7.95	0.9799	0.0021	0.8084	0.0067	SB					SALANYIHL	9	54.102	4.28	0.9932	0.0007	0.8655	0.0047
YAPVGILFL	9	45.1643	97.14	0.8454	0.0159	0.5771	0.042	SB					ATIINEEVL	9	50.6548	14.22	0.9736	0.0027	0.7546	0.0086
GMIENGPFL	9	47.311	68.5	0.8132	0.0194	0.6093	0.0329	SB					KIIGNTENL	9	46.5498	642.68	0.5758	0.0714	0.4024	0.2271
AGIYNLDDL	9	64.1883	21.21	0.8677	0.0136	0.7177	0.0099	SB					GMIINVLEL	9	50.5284	29.7	0.8708	0.0132	0.6866	0.014
SGPTIQDYL	9	42.966	74.71	0.8921	0.011	0.6013	0.035	SB					QAVHNGTYI	9	44.9125	16.06	0.9295	0.0072	0.7434	0.009
ELGTMTQTL	9	42.9673	27083.1	0.008	8.2372	0.0567	18.8248	WB					LSGLNQEEL	9	56.1	114.35	0.7997	0.0211	0.562	0.0479
MGILNTDTL	9	45.8854	4.85	0.9822	0.0018	0.8541	0.0051	SB					GANVNAKDTL	10	37.8844	267.64	0.5844	0.0685	0.4834	0.1052
MPGVNIAYL	9	49.1003	1270.2	0.2093	0.4545	0.3395	0.3971	SB					IGPFNNIDI	9	44.987	371.88	0.4322	0.1464	0.453	0.1406
SAVVDKDFL	9	61.6821	43.66	0.8481	0.0156	0.651	0.0216	SB					RALSNLESI	9	51.8393	4.16	0.9919	0.0008	0.8683	0.0046
GMLRSLSTL	9	65.0429	669.87	0.3764	0.1961	0.3986	0.2342	SB					TTLRNGEVL	9	50.0067	20.04	0.9557	0.0045	0.7229	0.0097
SLMPAAEEM	9	50.6571	3151.72	0.2236	0.4129	0.2555	0.9271	SB					SVNKNLQSL	9	49.2559	366.16	0.7412	0.0315	0.4544	0.1384
SMVLNSQSL	9	50.1787	20.25	0.9322	0.0069	0.722	0.0098	SB					TGPFNLQLI	9	45.0145	51.17	0.85	0.0154	0.6363	0.0264
ANTTNLTFL	9	41.9123	199.84	0.6692	0.0463	0.5104	0.0789	SB					SQLQSLTLI	9	42.9567	217.66	0.6357	0.0537	0.5025	0.0862
SAPQTLHQI	9	41.0179	263.28	0.8454	0.0159	0.4849	0.1037	SB					ASPEDRESL	9	46.8879	1010.4	0.685	0.0435	0.3606	0.3238
YSLTLVDAL	9	51.6353	28.12	0.8659	0.0137	0.6916	0.0133	SB					SLLSNLDEI	9	44.3871	14.44	0.9031	0.0099	0.7532	0.0087
QAVLNLHSI	9	42.9657	17.19	0.948	0.0053	0.7371	0.0092	SB					VSVTNLEEL	9	51.6497	6.72	0.9882	0.0012	0.8239	0.0062
TSTTNPEFV	9	42.9516	98.06	0.7667	0.0257	0.5762	0.0423	SB					AALPNIYEL	9	42.9644	8.62	0.9933	0.0007	0.801	0.007
SAPTARVFM	9	47.2006	135.88	0.779	0.0238	0.546	0.0572	SB					KTVVDIDTI	9	46.4554	308.32	0.5425	0.0904	0.4703	0.118
STISNDVFI	9	49.8752	11.2	0.9423	0.0059	0.7767	0.0078	SB					VMVSNVLLI	9	42.9518	34.08	0.7511	0.0292	0.6739	0.0161
SAISNLDYI	9	57.2631	1.79	0.9986	0.0001	0.946	0.0019	SB					FGNLNKVVL	9	40.6853	108.87	0.7914	0.0222	0.5665	0.0461
SAVLIQGHGL	10	46.7705	9277.38	0.0458	2.2505	0.1557	2.9722	WB					KAIGNAFAVL	10	44.8279	73.94	0.7457	0.0304	0.6023	0.0347
KVVNPYYL	8	64.7851	4600.45	0.176	0.5729	0.2205	1.3252	WB					STIRLLTSL	9	40.2993	558.32	0.5765	0.0711	0.4154	0.2029
RSLLLLAPL	9	48.603	143.12	0.374	0.1984	0.5412	0.0603	SB					SGVWNVTEL	9	38.6269	44.3	0.8987	0.0104	0.6496	0.0222
FQAMNKEL	8	44.7944	4679.82	0.1392	0.7369	0.2189	1.3477	WB					GTNLNPEFI	9	42.9672	266.06	0.6346	0.054	0.4839	0.1046
FALYNAANL	9	41.0844	8.4	0.9389	0.0062	0.8033	0.0069	SB					VIGRNGEMI	9	53.1752	1655.34	0.2317	0.3935	0.315	0.5082
IENLSGARH	9	42.0508	41817	0.0005	35.4545	0.0165	67.522	WB					INTTNIDTL	9	41.8627	169.35	0.7001	0.0407	0.5257	0.0677
AQPVNVQQL	9	47.2296	117.93	0.9231	0.0079	0.5591	0.049	SB					AAMLLQQVM	9	45.2219	161.18	0.7177	0.0369	0.5303	0.0655
GMGFGLERM	9	41.0474	14104.4	0.0186	4.6241	0.117	5.4348	WB					SLITNKVVM	9	46.6968	30.9	0.9207	0.0081	0.6829	0.0145
NSPRNLAMEATYI	13	44.3359	268.24	0.208	0.4582	0.4832	0.1054	SB					TTVTNPEPM	9	53.9046	16.73	0.9361	0.0065	0.7396	0.0091
SLLTNADYT	9	47.5835	476.67	0.1815	0.5502	0.43	0.1817	WB					GNIQNTVML	9	42.9544	413.89	0.6614	0.0477	0.4431	0.1578
TAVVNVTYM	9	54.4554	4.21	0.9891	0.0011	0.8671	0.0047	SB					TSSVNKEQL	9	53.7909	167.37	0.844	0.016	0.5268	0.0672
SFFVNGLTL	9	45.6322	227.71	0.551	0.0837	0.4983	0.0901	SB					GHLTNLTHL	9	51.9893	748.13	0.4302	0.1478	0.3884	0.2538
SAIANIPAAAV	11	46.8007	40.52	0.7046	0.0399	0.6579	0.0194	SB					SALINLVEF	9	53.1423	11.96	0.9646	0.0036	0.7707	0.008
SLLTNHVTL	9	45.7241	20.88	0.9482	0.0053	0.7191	0.0099	SB					AALTLLEKM	9	48.0522	215.49	0.732	0.0336	0.5034	0.0853
VQVPNLESL	9	48.6666	54.14	0.9353	0.0066	0.6311	0.0276	SB					KANVNLAYL	9	42.9675	5.81	0.9845	0.0016	0.8373	0.0057
QAPQNKITV	9	45.8834	50.58	0.9498	0.0051	0.6374	0.0262	SB					SAVENLNEM	9	44.6423	7.28	0.985	0.0015	0.8166	0.0064
LALVNDQLL	9	50.0962	33.96	0.8686	0.0135	0.6742	0.016	SB					SQSPGREVM	9	49.1843	4376.99	0.2686	0.3268	0.2251	1.2627
SAPSAGSLYM	10	42.9554	371.08	0.5807	0.0696	0.4532	0.1403	SB					LGMSNVQEL	9	52.107	33.6	0.9203	0.0082	0.6752	0.0158
SSPSSSPTHL	10	45.2238	1946.21	0.4933	0.1097	0.3	0.5849	SB					KIGYNPDTV	9	64.4836	2002.97	0.2307	0.3952	0.2974	0.5985
GSDGSVGPVGPA	12	42.9671	36984.8	0.0001	65.2941	0.0279	44.2	WB					VINENFGTL	9	46.1782	1162.53	0.3684	0.2046	0.3476	0.3687
YAVTGDVKM	9	45.9522	897.81	0.4503	0.1338	0.3715	0.291	SB					KATTNIVEM	9	41.1582	17.73	0.967	0.0034	0.7343	0.0093
ASFFNISTL	9	40.9405	12.44	0.9689	0.0032	0.767	0.0082	SB					VSLQNLSMV	9	40.9722	28.47	0.8761	0.0127	0.6905	0.0134
NALENINVI	9	48.225	18.47	0.9368	0.0065	0.7305	0.0095	SB					SALVNYRAL	9	46.0219	9.85	0.9677	0.0033	0.7885	0.0074
GQVINLDQL	9	48.9496	65.88	0.851	0.0153	0.6129	0.0319	SB					GGVVNMYHM	9	51.5288	33.23	0.8456	0.0159	0.6762	0.0156
AAAAASSPAGLL	12	51.9628	16786	0.0028	15.309	0.1009	7.2025	WB					ISPTHPGEGL	10	52.8846	10994.1	0.081	1.2957	0.14	3.749
AALQNLEQL	9	52.8986	4.66	0.9959	0.0004	0.8577	0.005	SB					STIMNLLSL	9	45.1011	12.54	0.9596	0.0041	0.7663	0.0082
VSIQNLVKV	9	42.9569	22.56	0.9481	0.0053	0.712	0.0104	SB					GNVSNIYKL	9	45.3517	1215.95	0.4537	0.1314	0.3435	0.3831
SGIHLTIEM	9	41.7061	1135.95	0.423	0.1535	0.3498	0.3613	SB					STLINSLFL	9	50.2278	12.96	0.9486	0.0053	0.7632	0.0083
AALQNLEEL	9	61.038	3.52	0.9972	0.0003	0.8836	0.0041	SB					SLPTNLIHL	9	47.4756	164.15	0.8267	0.0179	0.5286	0.0663
SSIEHLTTL	9	41.3162	42.36	0.9363	0.0065	0.6538	0.0205	SB					MAPQNLSTF	9	50.4169	24.57	0.9298	0.0072	0.7041	0.0115
ASVLNTDPAL	10	42.9546	22.05	0.7832	0.0232	0.7141	0.0101	SB					RSGQNNSVF	9	40.761	1577.38	0.3464	0.2302	0.3194	0.487
GAVKNAQEAL	10	41.0374	335.3	0.6299	0.0553	0.4626	0.126	SB					YGIVNENSL	9	46.5949	9.78	0.9737	0.0027	0.7893	0.0074
SLEGPAWKI	9	64.9581	35367	0.003	14.7082	0.032	38.4561	WB					SSLENAFQI	9	49.9017	8.38	0.9773	0.0023	0.8036	0.0069
SVAVGPLGSTI	11	42.9667	14777.4	0.0195	4.4581	0.1127	5.8488	WB					TSVVLLTEM	9	42.9592	371.27	0.5457	0.0884	0.4531	0.1404
SAVKNLQQL	9	52.8367	9.64	0.9897	0.0011	0.7906	0.0073	SB					SQLQGYTVL	9	40.7166	270.64	0.7395	0.0319	0.4824	0.1062
VLSIGDGIAR	10	43.3726	41765	0.0002	46.5385	0.0166	67.2239	WB					GVHVNQELL	9	50.7248	321.22	0.6654	0.047	0.4665	0.1217
AAVLNPRFL	9	47.7112	34.96	0.9326	0.0069	0.6715	0.0166	SB					LSPINHNTL	9	45.5133	25.13	0.9555	0.0046	0.702	0.0118
VTLANKELL	9	48.2272	66.74	0.8675	0.0136	0.6118	0.0323	SB					YQNINSTGL	9	52.2094	185.29	0.7355	0.0328	0.5174	0.0729
FAHFNSHAA	9	53.8992	243.7	0.4118	0.1632	0.492	0.0965	SB					FSPFNPTSL	9	46.1931	26.48	0.967	0.0034	0.6972	0.0125
SSPTHTATSI	10	44.6035	1072.71	0.4069	0.1675	0.3551	0.3429	SB					VDVTNTTFL	9	42.3182	979.19	0.3844	0.1883	0.3635	0.3137
SSYINASFI	9	42.9674	6.67	0.9434	0.0058	0.8245	0.0062	SB					ISPENHISL	9	50.5519	32.21	0.9648	0.0036	0.6791	0.015
QAPINAQML	9	47.9292	70.86	0.9247	0.0077	0.6062	0.0337	SB					AAIENIEHL	9	44.7948	3.78	0.9974	0.0003	0.8772	0.0043
AAVNNVEATL	10	64.0808	31.02	0.9251	0.0077	0.6826	0.0145	SB					YGLTNNSKL	9	43.9019	36.57	0.9194	0.0082	0.6673	0.0174
SAPVAAEPFL	10	44.6871	305.83	0.4754	0.1187	0.4711	0.1173	SB					ISPFNFTAI	9	48.9954	16.99	0.9224	0.0079	0.7382	0.0092
SALANYIHL	9	54.102	4.28	0.9932	0.0007	0.8655	0.0047	SB					SSVVGVWYL	9	41.7148	218.65	0.6639	0.0472	0.5021	0.0866
ATIINEEVL	9	50.6548	14.22	0.9736	0.0027	0.7546	0.0086	SB					AAFPGASLYL	10	42.9628	2849.34	0.2813	0.3038	0.2648	0.84
KIIGNTENL	9	46.5498	642.68	0.5758	0.0714	0.4024	0.2271	SB					VTVLNVDHL	9	52.7294	13.88	0.9665	0.0034	0.7569	0.0085
GMIINVLEL	9	50.5284	29.7	0.8708	0.0132	0.6866	0.014	SB					VTLNTLHVI	9	57.654	5610.15	0.1281	0.8101	0.2022	1.6278
QAVHNGTYI	9	44.9125	16.06	0.9295	0.0072	0.7434	0.009	SB					VAPVLIREI	9	46.7718	881.71	0.5138	0.0996	0.3732	0.2874
LSGLNQEEL	9	56.1	114.35	0.7997	0.0211	0.562	0.0479	SB					FTTQGQSEL	9	40.7523	10100.3	0.0923	1.1325	0.1478	3.3392
GANVNAKDTL	10	37.8844	267.64	0.5844	0.0685	0.4834	0.1052	SB					YALSDLDTL	9	48.6431	19.22	0.9216	0.008	0.7268	0.0096
IGPFNNIDI	9	44.987	371.88	0.4322	0.1464	0.453	0.1406	SB					SALHNDLQI	9	44.8924	16.32	0.9465	0.0055	0.7419	0.0091
RALSNLESI	9	51.8393	4.16	0.9919	0.0008	0.8683	0.0046	SB					ASARNLEHL	9	45.8708	14.37	0.9724	0.0028	0.7537	0.0086
TTLRNGEVL	9	50.0067	20.04	0.9557	0.0045	0.7229	0.0097	SB					LSPINIQLL	9	47.1815	60.56	0.906	0.0096	0.6207	0.0299
SVNKNLQSL	9	49.2559	366.16	0.7412	0.0315	0.4544	0.1384	SB					AAMGTQGNVM	10	48.648	4758.5	0.1045	0.9985	0.2174	1.3696
TGPFNLQLI	9	45.0145	51.17	0.85	0.0154	0.6363	0.0264	SB					TISSNLTEM	9	40.9892	755.14	0.4688	0.122	0.3875	0.2557
SQLQSLTLI	9	42.9567	217.66	0.6357	0.0537	0.5025	0.0862	SB					IIGINGDYF	9	41.9175	1074.15	0.2256	0.4071	0.355	0.3434
LQDAEEAVE	9	40.7223	43198.9	0.0001	67.0588	0.0135	75.6371	WB					GSIINYMVV	9	41.037	28.57	0.805	0.0204	0.6902	0.0135
ASPEDRESL	9	46.8879	1010.4	0.685	0.0435	0.3606	0.3238	SB					VGIENIHVM	9	52.1897	10.44	0.9835	0.0017	0.7832	0.0076
SLLSNLDEI	9	44.3871	14.44	0.9031	0.0099	0.7532	0.0087	SB					SILSNIHEV	9	42.9631	94.21	0.7904	0.0223	0.5799	0.0409
VSVTNLEEL	9	51.6497	6.72	0.9882	0.0012	0.8239	0.0062	SB					KALTHLTDL	9	46.1986	645.71	0.4921	0.1103	0.402	0.2279
AALPNIYEL	9	42.9644	8.62	0.9933	0.0007	0.801	0.007	SB					RATSNVFAM	9	42.9639	28.15	0.8723	0.0131	0.6915	0.0133
KTVVDIDTI	9	46.4554	308.32	0.5425	0.0904	0.4703	0.118	SB					SSLSNPPPTI	10	53.2764	48.57	0.839	0.0166	0.6411	0.0253
VMVSNVLLI	9	42.9518	34.08	0.7511	0.0292	0.6739	0.0161	SB					KQVTSAEHL	9	44.315	1336.13	0.4774	0.1177	0.3348	0.4174
FGNLNKVVL	9	40.6853	108.87	0.7914	0.0222	0.5665	0.0461	SB					SQLISHQSI	9	37.6268	375.87	0.6182	0.0587	0.452	0.1421
KAIGNAFAVL	10	44.8279	73.94	0.7457	0.0304	0.6023	0.0347	SB					GAVKNLTYF	9	51.9994	31.79	0.8867	0.0116	0.6803	0.0148
STIRLLTSL	9	40.2993	558.32	0.5765	0.0711	0.4154	0.2029	SB					TSVSNFLVM	9	38.2261	16.06	0.9424	0.0059	0.7434	0.009
SGVWNVTEL	9	38.6269	44.3	0.8987	0.0104	0.6496	0.0222	SB					RAVIGSTYM	9	53.0585	89.18	0.7667	0.0257	0.585	0.0393
GTNLNPEFI	9	42.9672	266.06	0.6346	0.054	0.4839	0.1046	SB					LSPENNQVL	9	49.0462	178.92	0.8593	0.0144	0.5206	0.0701
TAPVPGQTPH	10	40.6303	27280.1	0.0049	11.0789	0.056	19.148	WB					QGVQNLQNL	9	45.0654	237.66	0.7694	0.0251	0.4944	0.0941
VIGRNGEMI	9	53.1752	1655.34	0.2317	0.3935	0.315	0.5082	SB					KGPENTLRV	9	44.9994	382.72	0.6796	0.0444	0.4503	0.1447
INTTNIDTL	9	41.8627	169.35	0.7001	0.0407	0.5257	0.0677	SB					AGILNHYLI	9	42.9647	11.55	0.9347	0.0067	0.7739	0.0079
AAMLLQQVM	9	45.2219	161.18	0.7177	0.0369	0.5303	0.0655	SB					YIHINIGAL	9	40.8483	289.14	0.5091	0.1017	0.4762	0.1122
KTVTNLISE	9	44.9478	16877.2	0.0071	8.9175	0.1004	7.2718	WB					ALLQNKDVI	9	50.9422	53.93	0.8243	0.0182	0.6314	0.0275
SLITNKVVM	9	46.6968	30.9	0.9207	0.0081	0.6829	0.0145	SB					AKLVNQEVL	9	50.2848	259.21	0.641	0.0521	0.4863	0.1023
TTVTNPEPM	9	53.9046	16.73	0.9361	0.0065	0.7396	0.0091	SB					SAMVSIEYV	9	49.1348	10.65	0.9124	0.009	0.7814	0.0077
FSSGASSHLL	10	50.5997	14085.5	0.0208	4.2573	0.1171	5.4237	WB					RQGANINEI	9	41.6732	180.21	0.6803	0.0443	0.5199	0.0707
GNIQNTVML	9	42.9544	413.89	0.6614	0.0477	0.4431	0.1578	SB					VALYNQGHI	9	42.9673	38.71	0.7937	0.0219	0.6621	0.0185
TSSVNKEQL	9	53.7909	167.37	0.844	0.016	0.5268	0.0672	SB					SAPQSAVELI	10	47.5141	666.05	0.4754	0.1187	0.3991	0.2333
SALAFGQGLAA	11	45.4475	15135	0.0068	9.1562	0.1104	6.0709	WB					FGLTLTSYI	9	41.321	109.54	0.4892	0.1117	0.566	0.0463
GHLTNLTHL	9	51.9893	748.13	0.4302	0.1478	0.3884	0.2538	SB					KTLGSVTYM	9	56.6453	1458.23	0.389	0.1839	0.3267	0.4541
SALINLVEF	9	53.1423	11.96	0.9646	0.0036	0.7707	0.008	SB					SQLQNQANL	9	47.984	25.07	0.9566	0.0044	0.7022	0.0118
AALTLLEKM	9	48.0522	215.49	0.732	0.0336	0.5034	0.0853	SB					AQFVAETHI	9	49.0407	1811.96	0.3568	0.2181	0.3066	0.551
KANVNLAYL	9	42.9675	5.81	0.9845	0.0016	0.8373	0.0057	SB					NTLNNIDVI	9	46.1547	23	0.8815	0.0121	0.7102	0.0107
SAVENLNEM	9	44.6423	7.28	0.985	0.0015	0.8166	0.0064	SB					GALENAKAEI	10	64.2465	330.02	0.488	0.1124	0.464	0.1242
SQSPGREVM	9	49.1843	4376.99	0.2686	0.3268	0.2251	1.2627	SB					FQVTHTVAL	9	43.2559	544.47	0.5514	0.0833	0.4178	0.1989
LGMSNVQEL	9	52.107	33.6	0.9203	0.0082	0.6752	0.0158	SB					RVSINTVNL	9	40.7565	1617.51	0.388	0.1849	0.3171	0.4975
KIGYNPDTV	9	64.4836	2002.97	0.2307	0.3952	0.2974	0.5985	SB					KQVLGQMVI	9	41.8808	3270.71	0.2054	0.4661	0.252	0.9664
VINENFGTL	9	46.1782	1162.53	0.3684	0.2046	0.3476	0.3687	SB					SAPTLEDHF	9	52.4044	725.16	0.6052	0.0624	0.3913	0.2479
KATTNIVEM	9	41.1582	17.73	0.967	0.0034	0.7343	0.0093	SB					AQVQNSEQL	9	45.295	41.47	0.9316	0.007	0.6557	0.0199
VSLQNLSMV	9	40.9722	28.47	0.8761	0.0127	0.6905	0.0134	SB					GMLHLTESI	9	48.9364	2385.82	0.1538	0.6636	0.2812	0.7102
GVHINAGPEI	10	42.9475	7216.93	0.0463	2.2296	0.1789	2.1823	WB					SAIQNLHSF	9	41.0074	10.12	0.9792	0.0021	0.7861	0.0075
SALVNYRAL	9	46.0219	9.85	0.9677	0.0033	0.7885	0.0074	SB					RVVANSEEI	9	48.9368	36.22	0.8681	0.0135	0.6682	0.0173
GGVVNMYHM	9	51.5288	33.23	0.8456	0.0159	0.6762	0.0156	SB					SAVENKQQI	9	43.8709	24.24	0.9637	0.0037	0.7054	0.0113
ISPTHPGEGL	10	52.8846	10994.1	0.081	1.2957	0.14	3.749	WB					RAVQDVESL	9	45.3384	352.36	0.7025	0.0403	0.458	0.133
STIMNLLSL	9	45.1011	12.54	0.9596	0.0041	0.7663	0.0082	SB					VTIMNPNVL	9	44.879	37.48	0.9358	0.0066	0.6651	0.0179
GNVSNIYKL	9	45.3517	1215.95	0.4537	0.1314	0.3435	0.3831	SB					FAIQNPTLI	9	45.4207	5.55	0.9873	0.0013	0.8417	0.0056
STLINSLFL	9	50.2278	12.96	0.9486	0.0053	0.7632	0.0083	SB					LGVTNFVHM	9	52.7706	27.81	0.8808	0.0122	0.6927	0.0131
SLPTNLIHL	9	47.4756	164.15	0.8267	0.0179	0.5286	0.0663	SB					QALQNLALM	9	42.9666	12.13	0.9567	0.0044	0.7693	0.0081
MAPQNLSTF	9	50.4169	24.57	0.9298	0.0072	0.7041	0.0115	SB					FNLVNNALL	9	40.8442	34.48	0.7671	0.0256	0.6728	0.0163
RSGQNNSVF	9	40.761	1577.38	0.3464	0.2302	0.3194	0.487	SB					STLRLLTTI	9	45.9276	273.85	0.607	0.0619	0.4813	0.1072
TGNFQVTEL	9	50.0706	16504.7	0.0381	2.6232	0.1024	6.988	WB					TSPYHVDSL	9	50.6159	457.52	0.702	0.0404	0.4338	0.1764
YGIVNENSL	9	46.5949	9.78	0.9737	0.0027	0.7893	0.0074	SB					WAIENPAAF	9	50.7296	101.67	0.7414	0.0314	0.5728	0.0436
SSLENAFQI	9	49.9017	8.38	0.9773	0.0023	0.8036	0.0069	SB					SQLDLTDNL	9	60.1502	2349.68	0.433	0.1459	0.2826	0.6995
TSVVLLTEM	9	42.9592	371.27	0.5457	0.0884	0.4531	0.1404	SB					YSLGSLEHL	9	41.6091	211.75	0.747	0.0302	0.505	0.0838
SQLQGYTVL	9	40.7166	270.64	0.7395	0.0319	0.4824	0.1062	SB					VTLMNPNTL	9	50.3933	30.65	0.9516	0.0049	0.6837	0.0144
GVHVNQELL	9	50.7248	321.22	0.6654	0.047	0.4665	0.1217	SB					QTVLNPVTM	9	46.9916	109.74	0.8685	0.0135	0.5658	0.0464
LSPINHNTL	9	45.5133	25.13	0.9555	0.0046	0.702	0.0118	SB					SILTNPRAM	9	49.0827	311.37	0.6397	0.0525	0.4694	0.1189
PVAVAGAPITL	11	47.0908	24071.2	0.0036	13.3439	0.0676	14.4457	WB					SSIINKMLL	9	48.5403	12.42	0.9688	0.0032	0.7671	0.0082
AVPGALGPLTL	11	49	17615.5	0.042	2.4191	0.0964	7.8412	WB					VSPENIIFT	9	44.9609	714.99	0.4385	0.142	0.3926	0.2454
YQNINSTGL	9	52.2094	185.29	0.7355	0.0328	0.5174	0.0729	SB					AQYVSPELL	9	41.1059	1224.85	0.5234	0.0965	0.3428	0.3854
FSPFNPTSL	9	46.1931	26.48	0.967	0.0034	0.6972	0.0125	SB					YALALISRI	9	48.1421	287.62	0.4874	0.1127	0.4767	0.1117
VDVTNTTFL	9	42.3182	979.19	0.3844	0.1883	0.3635	0.3137	SB					SQMGNLHAF	9	48.6233	136.25	0.7605	0.0271	0.5458	0.0573
ISPENHISL	9	50.5519	32.21	0.9648	0.0036	0.6791	0.015	SB					TVMNNLSEL	9	48.9116	101.19	0.7915	0.0221	0.5733	0.0435
AAIENIEHL	9	44.7948	3.78	0.9974	0.0003	0.8772	0.0043	SB					NMVAKVDEV	9	52.4641	3665.25	0.0916	1.141	0.2415	1.0734
YGLTNNSKL	9	43.9019	36.57	0.9194	0.0082	0.6673	0.0174	SB					KAMENIGEL	9	48.8811	12.6	0.9731	0.0027	0.7658	0.0082
ISPFNFTAI	9	48.9954	16.99	0.9224	0.0079	0.7382	0.0092	SB					SQLVKADEM	9	52.77	164.37	0.7402	0.0317	0.5284	0.0664
SSVVGVWYL	9	41.7148	218.65	0.6639	0.0472	0.5021	0.0866	SB					SLVTNMDKL	9	44.3311	80.68	0.7903	0.0223	0.5942	0.0368
AAFPGASLYL	10	42.9628	2849.34	0.2813	0.3038	0.2648	0.84	SB					KTVENFVAL	9	45.0456	50.78	0.9011	0.0101	0.637	0.0263
VTVLNVDHL	9	52.7294	13.88	0.9665	0.0034	0.7569	0.0085	SB					YGLLNVTKI	9	51.8705	10.09	0.9646	0.0036	0.7864	0.0075
VTLNTLHVI	9	57.654	5610.15	0.1281	0.8101	0.2022	1.6278	WB					SSPVEQEVM	9	41.1119	244.8	0.7812	0.0235	0.4916	0.0969
VAPVLIREI	9	46.7718	881.71	0.5138	0.0996	0.3732	0.2874	SB					SMEVNVDVL	9	52.2908	33.85	0.8304	0.0175	0.6745	0.016
GGVGFGGLEAM	11	45.3732	20120.6	0.009	7.6433	0.0841	10.033	WB					NSTFNQVVL	9	44.9084	400.14	0.6109	0.0608	0.4462	0.1513
FTTQGQSEL	9	40.7523	10100.3	0.0923	1.1325	0.1478	3.3392	WB					FQNVNSVTL	9	51.7408	17.32	0.9536	0.0047	0.7364	0.0092
YALSDLDTL	9	48.6431	19.22	0.9216	0.008	0.7268	0.0096	SB					AAPGNKTSYI	10	44.8327	58.76	0.8417	0.0163	0.6235	0.0293
SALHNDLQI	9	44.8924	16.32	0.9465	0.0055	0.7419	0.0091	SB					FMVEKGPTL	9	44.9023	1558.46	0.368	0.205	0.3206	0.4819
ASARNLEHL	9	45.8708	14.37	0.9724	0.0028	0.7537	0.0086	SB					SQLHSTVHL	9	44.9963	1187.67	0.5713	0.0733	0.3457	0.3755
LSPINIQLL	9	47.1815	60.56	0.906	0.0096	0.6207	0.0299	SB					SLYANIDIL	9	45.005	38.14	0.8396	0.0165	0.6635	0.0183
AAMGTQGNVM	10	48.648	4758.5	0.1045	0.9985	0.2174	1.3696	WB					AAITNKYQL	9	52.2049	9.64	0.9888	0.0011	0.7906	0.0073
TISSNLTEM	9	40.9892	755.14	0.4688	0.122	0.3875	0.2557	SB					YAVRDTIAL	9	45.5289	216.54	0.6665	0.0468	0.503	0.0857
LLEGEDAHLTQYK	13	40.9315	43585.8	0	85.8333	0.0127	77.9914	WB					AAPRSFIFL	9	49.6519	135.42	0.8417	0.0163	0.5464	0.0569
IIGINGDYF	9	41.9175	1074.15	0.2256	0.4071	0.355	0.3434	SB					FSVEGQENL	9	44.2812	934.27	0.4974	0.1076	0.3678	0.2992
GSIINYMVV	9	41.037	28.57	0.805	0.0204	0.6902	0.0135	SB					GVMTNKDEI	9	44.4877	69.43	0.793	0.022	0.6081	0.0332
VGIENIHVM	9	52.1897	10.44	0.9835	0.0017	0.7832	0.0076	SB					GQKENGNYI	9	43.4341	683.76	0.5697	0.074	0.3967	0.2378
SILSNIHEV	9	42.9631	94.21	0.7904	0.0223	0.5799	0.0409	SB					MSLENGTRV	9	49.5241	58.4	0.7975	0.0214	0.6241	0.0292
KALTHLTDL	9	46.1986	645.71	0.4921	0.1103	0.402	0.2279	SB					TALESLIEM	9	37.0294	318.89	0.7081	0.0391	0.4672	0.1211
RATSNVFAM	9	42.9639	28.15	0.8723	0.0131	0.6915	0.0133	SB					NPVENLTHV	9	41.8766	6164.44	0.1199	0.8695	0.1935	1.813
SSLSNPPPTI	10	53.2764	48.57	0.839	0.0166	0.6411	0.0253	SB					FVARNSSEL	9	42.3515	193.93	0.687	0.0431	0.5132	0.0765
KQVTSAEHL	9	44.315	1336.13	0.4774	0.1177	0.3348	0.4174	SB					SALRAQETF	9	42.96	485.21	0.6001	0.0639	0.4284	0.184
SQLISHQSI	9	37.6268	375.87	0.6182	0.0587	0.452	0.1421	SB					KSVENFVSL	9	48.7401	13.79	0.977	0.0023	0.7575	0.0085
GAVKNLTYF	9	51.9994	31.79	0.8867	0.0116	0.6803	0.0148	SB					SQNILATYL	9	47.7334	509.31	0.5852	0.0683	0.4239	0.1903
VRFTTGDAM	9	44.9191	14847.4	0.0198	4.4122	0.1122	5.8914	WB					AALQKLEHL	9	45.2458	261.59	0.7926	0.022	0.4855	0.1031
TSVSNFLVM	9	38.2261	16.06	0.9424	0.0059	0.7434	0.009	SB					SMEVNVDTL	9	51.6137	23.45	0.8886	0.0114	0.7084	0.0109
RAVIGSTYM	9	53.0585	89.18	0.7667	0.0257	0.585	0.0393	SB					SQFVDVDTL	9	49.1994	76.34	0.8614	0.0142	0.5993	0.0355
LSPENNQVL	9	49.0462	178.92	0.8593	0.0144	0.5206	0.0701	SB					TMAYNITPL	9	51.8727	20.28	0.8025	0.0207	0.7219	0.0098
QGVQNLQNL	9	45.0654	237.66	0.7694	0.0251	0.4944	0.0941	SB					SSLQNYAKI	9	44.6102	10.47	0.9645	0.0036	0.7829	0.0076
KGPENTLRV	9	44.9994	382.72	0.6796	0.0444	0.4503	0.1447	SB					YSFPNVALI	9	40.8091	9.62	0.959	0.0042	0.7908	0.0073
AGILNHYLI	9	42.9647	11.55	0.9347	0.0067	0.7739	0.0079	SB					SLVNIVQHI	9	54.4739	7191.29	0.1041	1.0022	0.1792	2.1727
YIHINIGAL	9	40.8483	289.14	0.5091	0.1017	0.4762	0.1122	SB					NALHNIKTL	9	47.0032	130.31	0.8224	0.0184	0.5499	0.0545
ALLQNKDVI	9	50.9422	53.93	0.8243	0.0182	0.6314	0.0275	SB					STVENFSQL	9	47.1363	54.98	0.9105	0.0091	0.6297	0.0279
AKLVNQEVL	9	50.2848	259.21	0.641	0.0521	0.4863	0.1023	SB					SGPQLFQTF	9	53.4899	1392.77	0.5104	0.1011	0.3309	0.4348
SAMVSIEYV	9	49.1348	10.65	0.9124	0.009	0.7814	0.0077	SB					SGIRNISFM	9	52.6129	5.48	0.9798	0.0021	0.8428	0.0055
PAEVGCLVNL	10	45.0907	33760.7	0.0004	35.9697	0.0363	33.5183	WB					GLLNNPHFI	9	61.0898	565.59	0.4747	0.1191	0.4142	0.2051
RQGANINEI	9	41.6732	180.21	0.6803	0.0443	0.5199	0.0707	SB					VSLLDIDHL	9	46.9585	193.69	0.7347	0.033	0.5133	0.0764
VALYNQGHI	9	42.9673	38.71	0.7937	0.0219	0.6621	0.0185	SB					RAIPNNQVL	9	45.0096	27.05	0.9708	0.003	0.6952	0.0128
SAPQSAVELI	10	47.5141	666.05	0.4754	0.1187	0.3991	0.2333	SB					NQPVNGSYF	9	42.0203	429.91	0.5959	0.0651	0.4396	0.1651
FGLTLTSYI	9	41.321	109.54	0.4892	0.1117	0.566	0.0463	SB					GTLENEYTV	9	52.4071	445.17	0.5677	0.0748	0.4364	0.1718
KTLGSVTYM	9	56.6453	1458.23	0.389	0.1839	0.3267	0.4541	SB					VALGNMYEL	9	42.8583	12.66	0.9692	0.0031	0.7654	0.0082
SQLQNQANL	9	47.984	25.07	0.9566	0.0044	0.7022	0.0118	SB					SSPGPLPEEI	10	49.9669	3605.3	0.3386	0.2393	0.243	1.0587
AQFVAETHI	9	49.0407	1811.96	0.3568	0.2181	0.3066	0.551	SB					SVLFNLTTM	9	50.0356	14.36	0.9447	0.0057	0.7538	0.0086
NTLNNIDVI	9	46.1547	23	0.8815	0.0121	0.7102	0.0107	SB					YSIINGIVF	9	49.7855	49.69	0.8377	0.0167	0.639	0.0258
GALENAKAEI	10	64.2465	330.02	0.488	0.1124	0.464	0.1242	SB					VALRNINLI	9	45.1753	7.51	0.9699	0.0031	0.8136	0.0065
FQVTHTVAL	9	43.2559	544.47	0.5514	0.0833	0.4178	0.1989	SB					NALSNLFTM	9	48.9656	7.64	0.9659	0.0035	0.812	0.0066
RVSINTVNL	9	40.7565	1617.51	0.388	0.1849	0.3171	0.4975	SB					GTMVNKTLM	9	44.0855	82.33	0.7813	0.0235	0.5923	0.0373
KQVLGQMVI	9	41.8808	3270.71	0.2054	0.4661	0.252	0.9664	SB					SPPTNFNHL	9	48.054	966.91	0.5726	0.0728	0.3647	0.3097
SAPTLEDHF	9	52.4044	725.16	0.6052	0.0624	0.3913	0.2479	SB					SQLQAEHTL	9	45.8591	1927.62	0.5382	0.0918	0.3009	0.5804
AQVQNSEQL	9	45.295	41.47	0.9316	0.007	0.6557	0.0199	SB					SAIFNFQSL	9	51.1134	6.17	0.9888	0.0011	0.8318	0.0059
GMLHLTESI	9	48.9364	2385.82	0.1538	0.6636	0.2812	0.7102	WB					AAPAPSLWTL	10	44.7497	1809.88	0.4196	0.1565	0.3067	0.5505
SAIQNLHSF	9	41.0074	10.12	0.9792	0.0021	0.7861	0.0075	SB					SSVFNVEMV	9	41.64	20.79	0.8919	0.0111	0.7195	0.0098
SEPVTGLDAK	10	69.922	35418.7	0.0007	29.2807	0.0319	38.6185	WB					AMMAKAEYL	9	45.881	181.64	0.5704	0.0737	0.5192	0.0713
RVVANSEEI	9	48.9368	36.22	0.8681	0.0135	0.6682	0.0173	SB					YSPTGKEFV	9	44.1156	490.6	0.5555	0.0799	0.4274	0.1854
SAVENKQQI	9	43.8709	24.24	0.9637	0.0037	0.7054	0.0113	SB					SASFNIIEF	9	48.039	323.32	0.6523	0.0493	0.4659	0.1223
RAVQDVESL	9	45.3384	352.36	0.7025	0.0403	0.458	0.133	SB					SGPRDHVFI	9	50.4209	147.53	0.6925	0.0421	0.5384	0.0616
VTIMNPNVL	9	44.879	37.48	0.9358	0.0066	0.6651	0.0179	SB					LQGRNPETL	9	46.0071	345.91	0.6954	0.0416	0.4597	0.1304
FAIQNPTLI	9	45.4207	5.55	0.9873	0.0013	0.8417	0.0056	SB					GALKNTDYF	9	52.704	17.35	0.9343	0.0067	0.7363	0.0093
LGVTNFVHM	9	52.7706	27.81	0.8808	0.0122	0.6927	0.0131	SB					SSGKNLFYL	9	46.0836	14.04	0.9556	0.0045	0.7558	0.0086
QALQNLALM	9	42.9666	12.13	0.9567	0.0044	0.7693	0.0081	SB					IAARNQENL	9	64.0308	41.3	0.9153	0.0087	0.6561	0.0198
VRNAPGQYI	9	43.8481	25039	0.0098	7.2333	0.0639	15.7371	WB					YAPAPFLHI	9	51.0333	438	0.6582	0.0483	0.4379	0.1687
FNLVNNALL	9	40.8442	34.48	0.7671	0.0256	0.6728	0.0163	SB					GVIILYDHV	9	40.8375	4270.47	0.0835	1.2548	0.2274	1.2326
TSLRILDLS	9	45.1302	11718.4	0.0071	8.9175	0.1341	4.097	WB					FSPLNPVRV	9	44.1529	71.1	0.8835	0.0119	0.6059	0.0338
STLRLLTTI	9	45.9276	273.85	0.607	0.0619	0.4813	0.1072	SB					RGLENLTLL	9	45.1742	27.11	0.9409	0.006	0.695	0.0128
TSPYHVDSL	9	50.6159	457.52	0.702	0.0404	0.4338	0.1764	SB					SALQNVKRL	9	45.2323	47.36	0.9344	0.0067	0.6434	0.0247
WAIENPAAF	9	50.7296	101.67	0.7414	0.0314	0.5728	0.0436	SB					FSLTNGMYP	9	50.8417	288.62	0.339	0.2388	0.4764	0.112
TVNVQDTEL	9	49.3101	20299	0.0214	4.1617	0.0833	10.2088	WB					ASYINPDHL	9	41.004	8.07	0.9877	0.0013	0.8071	0.0068
SQLDLTDNL	9	60.1502	2349.68	0.433	0.1459	0.2826	0.6995	SB					SVVQNQQQV	9	44.8557	301.18	0.7211	0.0361	0.4725	0.1159
YSLGSLEHL	9	41.6091	211.75	0.747	0.0302	0.505	0.0838	SB					AAMVSKFFL	9	44.676	106.04	0.6757	0.0451	0.569	0.0451
VTLMNPNTL	9	50.3933	30.65	0.9516	0.0049	0.6837	0.0144	SB					SQLLNLTQL	9	51.9924	11.96	0.978	0.0022	0.7706	0.008
QTVLNPVTM	9	46.9916	109.74	0.8685	0.0135	0.5658	0.0464	SB					SSPQNQEQI	9	42.9644	9.14	0.9903	0.001	0.7955	0.0072
SILTNPRAM	9	49.0827	311.37	0.6397	0.0525	0.4694	0.1189	SB					VTVENVQEL	9	46.5936	85.66	0.9081	0.0094	0.5887	0.0383
MGVAMLNGLI	10	48.4493	10201.3	0.0012	23.2679	0.1469	3.3829	WB					RTVGNIEEL	9	44.7516	88.97	0.878	0.0125	0.5852	0.0392
SISASSGLIAL	11	55.9835	18309.5	0.0196	4.4527	0.0928	8.3831	WB					GSLRNLEEL	9	44.7467	10.35	0.9781	0.0022	0.784	0.0076
SSIINKMLL	9	48.5403	12.42	0.9688	0.0032	0.7671	0.0082	SB					KSLENILTL	9	46.8343	10.12	0.986	0.0014	0.7861	0.0075
TPVISGGPYE	10	69.4451	39581.4	0.0002	49.0833	0.0216	55.6014	WB					SQLELKSLI	9	45.3349	1671.6	0.3659	0.2075	0.3141	0.5128
VSPENIIFT	9	44.9609	714.99	0.4385	0.142	0.3926	0.2454	SB					GMLSNMISF	9	42.9464	415.24	0.4351	0.1444	0.4428	0.1584
AQYVSPELL	9	41.1059	1224.85	0.5234	0.0965	0.3428	0.3854	SB					YSLGNTYTL	9	48.4659	6.24	0.9877	0.0013	0.8307	0.0059
YALALISRI	9	48.1421	287.62	0.4874	0.1127	0.4767	0.1117	SB					FAHTNIESL	9	53.4847	5.68	0.9908	0.0009	0.8395	0.0056
SQMGNLHAF	9	48.6233	136.25	0.7605	0.0271	0.5458	0.0573	SB					SHVTNVDFL	9	51.8176	93.91	0.6448	0.0511	0.5802	0.0408
TVMNNLSEL	9	48.9116	101.19	0.7915	0.0221	0.5733	0.0435	SB					SAIVNLPGCSA	11	42.9471	223.55	0.3337	0.245	0.5	0.0885
NMVAKVDEV	9	52.4641	3665.25	0.0916	1.141	0.2415	1.0734	WB					RQILNADAM	9	42.9618	11.52	0.9329	0.0069	0.7741	0.0079
KAMENIGEL	9	48.8811	12.6	0.9731	0.0027	0.7658	0.0082	SB					TQSVNIEQL	9	64.1257	100.3	0.8882	0.0114	0.5741	0.0431
SQLVKADEM	9	52.77	164.37	0.7402	0.0317	0.5284	0.0664	SB					VMIPNVETI	9	44.8027	8.47	0.9753	0.0025	0.8026	0.0069
AHPGPVNSEL	10	42.9573	23763	0.0372	2.6846	0.0688	14.0271	WB					RQLENGTTL	9	49.6103	26.22	0.9518	0.0049	0.6981	0.0124
SLVTNMDKL	9	44.3311	80.68	0.7903	0.0223	0.5942	0.0368	SB					ISLKNSQEI	9	45.8965	11.72	0.974	0.0027	0.7725	0.008
KTVENFVAL	9	45.0456	50.78	0.9011	0.0101	0.637	0.0263	SB					TQVSLKDQI	9	44.2953	2898.06	0.2681	0.3276	0.2632	0.8535
EIKNLQYL	8	51.1941	15265.1	0.0288	3.301	0.1097	6.1562	WB					ATVGPLVVYL	10	45.2787	11782	0.0563	1.842	0.1336	4.1316
YGLLNVTKI	9	51.8705	10.09	0.9646	0.0036	0.7864	0.0075	SB					SSLEMTTTF	9	52.7891	358.19	0.6596	0.048	0.4565	0.1353
SSPVEQEVM	9	41.1119	244.8	0.7812	0.0235	0.4916	0.0969	SB					YNISNSSTF	9	56.3893	76.1	0.7937	0.0219	0.5996	0.0354
SMEVNVDVL	9	52.2908	33.85	0.8304	0.0175	0.6745	0.016	SB					FHLQNGAVM	9	48.2354	247.15	0.4472	0.1359	0.4907	0.0979
NSTFNQVVL	9	44.9084	400.14	0.6109	0.0608	0.4462	0.1513	SB					NGPQNIYNL	9	64.2321	112.57	0.8539	0.015	0.5634	0.0473
FQNVNSVTL	9	51.7408	17.32	0.9536	0.0047	0.7364	0.0092	SB					ASIQNGKDSL	10	40.2107	28.01	0.9399	0.0061	0.692	0.0132
AAPGNKTSYI	10	44.8327	58.76	0.8417	0.0163	0.6235	0.0293	SB					VSSRNVEEL	9	64.1646	39.05	0.9311	0.007	0.6613	0.0187
FMVEKGPTL	9	44.9023	1558.46	0.368	0.205	0.3206	0.4819	SB					VTNLNPDFI	9	46.628	54.18	0.8105	0.0197	0.631	0.0276
SQLHSTVHL	9	44.9963	1187.67	0.5713	0.0733	0.3457	0.3755	SB					VALLNLENM	9	50.0425	6.93	0.9798	0.0021	0.821	0.0063
SLYANIDIL	9	45.005	38.14	0.8396	0.0165	0.6635	0.0183	SB					ATLEKQETI	9	45.0164	1383.65	0.4875	0.1126	0.3316	0.432
AAITNKYQL	9	52.2049	9.64	0.9888	0.0011	0.7906	0.0073	SB					VSARNIMLL	9	45.0265	121.19	0.7813	0.0235	0.5566	0.0499
YAVRDTIAL	9	45.5289	216.54	0.6665	0.0468	0.503	0.0857	SB					VALINKDFL	9	53.0415	4.51	0.99	0.001	0.8607	0.0049
AAPRSFIFL	9	49.6519	135.42	0.8417	0.0163	0.5464	0.0569	SB					VGIRNTFLL	9	51.4629	18.33	0.9272	0.0074	0.7312	0.0094
FSVEGQENL	9	44.2812	934.27	0.4974	0.1076	0.3678	0.2992	SB					ELLMNADVI	9	42.9675	531.09	0.263	0.3369	0.42	0.1957
GVMTNKDEI	9	44.4877	69.43	0.793	0.022	0.6081	0.0332	SB					SAIMNPASKV	10	41.1496	59.9	0.7047	0.0399	0.6217	0.0297
GQKENGNYI	9	43.4341	683.76	0.5697	0.074	0.3967	0.2378	SB					SSVSNVNLTL	10	48.1082	40.88	0.9163	0.0086	0.657	0.0196
MSLENGTRV	9	49.5241	58.4	0.7975	0.0214	0.6241	0.0292	SB					VGIENFELL	9	49.0946	10.73	0.9727	0.0028	0.7807	0.0077
TALESLIEM	9	37.0294	318.89	0.7081	0.0391	0.4672	0.1211	SB					VVVENITLM	9	44.9598	135.77	0.766	0.0258	0.5461	0.0571
NPVENLTHV	9	41.8766	6164.44	0.1199	0.8695	0.1935	1.813	WB					GQVKNDLFL	9	50.181	263.87	0.6432	0.0515	0.4847	0.1039
FVARNSSEL	9	42.3515	193.93	0.687	0.0431	0.5132	0.0765	SB					FQALNAEKL	9	45.426	106.47	0.7984	0.0212	0.5686	0.0453
SALRAQETF	9	42.96	485.21	0.6001	0.0639	0.4284	0.184	SB					STHTNGGLTF	10	42.967	3155.75	0.1907	0.5125	0.2553	0.9284
KSVENFVSL	9	48.7401	13.79	0.977	0.0023	0.7575	0.0085	SB					FALNNPEMV	9	51.3029	15.8	0.9264	0.0075	0.7449	0.009
SQNILATYL	9	47.7334	509.31	0.5852	0.0683	0.4239	0.1903	SB					LGVSNFNHF	9	56.254	253.67	0.5578	0.0789	0.4883	0.1003
YLAVDLSNK	9	61.8432	36204.1	0.0002	44.0625	0.0298	41.2778	WB					SALGNQSGSTL	11	40.8273	60.82	0.902	0.01	0.6203	0.03
AALQKLEHL	9	45.2458	261.59	0.7926	0.022	0.4855	0.1031	SB					SQQQNFIVA	9	65.4103	694.43	0.3994	0.174	0.3953	0.2404
SMEVNVDTL	9	51.6137	23.45	0.8886	0.0114	0.7084	0.0109	SB					TATMNLDRI	9	45.0947	28.89	0.8196	0.0187	0.6891	0.0136
SQFVDVDTL	9	49.1994	76.34	0.8614	0.0142	0.5993	0.0355	SB					IFVSNIDNL	9	52.9954	912.08	0.301	0.281	0.3701	0.2943
TMAYNITPL	9	51.8727	20.28	0.8025	0.0207	0.7219	0.0098	SB					FGGHNEDFI	9	42.2606	78.7	0.5367	0.0923	0.5965	0.0362
ATIIIDTNY	9	51.2901	27256.2	0.0071	8.9295	0.0561	19.1046	WB					YAVGNHDFI	9	44.9076	3.49	0.9844	0.0016	0.8846	0.004
SSLQNYAKI	9	44.6102	10.47	0.9645	0.0036	0.7829	0.0076	SB					FGPTDKEEI	9	45.0123	499.01	0.5738	0.0723	0.4258	0.1876
SIQNGKYTL	9	46.0491	18155.4	0.0428	2.3813	0.0936	8.2633	WB					TAFNNLENL	9	50.9689	13.52	0.9664	0.0034	0.7593	0.0084
YSFPNVALI	9	40.8091	9.62	0.959	0.0042	0.7908	0.0073	SB					SQIRNMASL	9	41.2974	8.89	0.9748	0.0026	0.7981	0.0071
SLVNIVQHI	9	54.4739	7191.29	0.1041	1.0022	0.1792	2.1727	WB					LSLPNTDYI	9	52.0666	5.17	0.9789	0.0022	0.8482	0.0053
NALHNIKTL	9	47.0032	130.31	0.8224	0.0184	0.5499	0.0545	SB					GQGRNPFFL	9	42.8166	551.75	0.536	0.0925	0.4165	0.2009
STVENFSQL	9	47.1363	54.98	0.9105	0.0091	0.6297	0.0279	SB					SGVSNFAQLI	10	53.1488	94.71	0.5267	0.0955	0.5794	0.0411
SGPQLFQTF	9	53.4899	1392.77	0.5104	0.1011	0.3309	0.4348	SB					RSLYNVNGL	9	64.139	148.3	0.7039	0.0401	0.538	0.0619
SGIRNISFM	9	52.6129	5.48	0.9798	0.0021	0.8428	0.0055	SB					FALTLQETL	9	47.4042	30.79	0.9179	0.0084	0.6833	0.0144
GLLNNPHFI	9	61.0898	565.59	0.4747	0.1191	0.4142	0.2051	SB					GLLQNLQHL	9	39.9808	374.42	0.6675	0.0466	0.4524	0.1416
VSLLDIDHL	9	46.9585	193.69	0.7347	0.033	0.5133	0.0764	SB					IQGILIEHL	9	43.3239	4569.54	0.2422	0.3745	0.2211	1.3164
RAIPNNQVL	9	45.0096	27.05	0.9708	0.003	0.6952	0.0128	SB					YAPEDTEVL	9	40.6672	269.72	0.8	0.021	0.4827	0.1059
NQPVNGSYF	9	42.0203	429.91	0.5959	0.0651	0.4396	0.1651	SB					FGATNWDLI	9	49.4537	10.23	0.8251	0.0181	0.7851	0.0075
GTLENEYTV	9	52.4071	445.17	0.5677	0.0748	0.4364	0.1718	SB					FVARNGPEF	9	52.9778	1535.56	0.3404	0.2372	0.3219	0.4757
VALGNMYEL	9	42.8583	12.66	0.9692	0.0031	0.7654	0.0082	SB					TAIENATVAF	10	53.9002	291.91	0.618	0.0587	0.4754	0.113
SSPGPLPEEI	10	49.9669	3605.3	0.3386	0.2393	0.243	1.0587	SB					SSPQHPASLL	10	47.6956	3523.32	0.3211	0.259	0.2452	1.0382
SVLFNLTTM	9	50.0356	14.36	0.9447	0.0057	0.7538	0.0086	SB					RSAENFTVL	9	51.2505	20.62	0.9599	0.0041	0.7203	0.0098
YSIINGIVF	9	49.7855	49.69	0.8377	0.0167	0.639	0.0258	SB					FAPYNKPSL	9	50.4719	34.78	0.9557	0.0045	0.672	0.0165
VALRNINLI	9	45.1753	7.51	0.9699	0.0031	0.8136	0.0065	SB					KSVANLEYL	9	64.177	5.02	0.9889	0.0011	0.8508	0.0052
NALSNLFTM	9	48.9656	7.64	0.9659	0.0035	0.812	0.0066	SB					ASLSNRLYI	9	63.8297	6.33	0.971	0.003	0.8294	0.006
GTMVNKTLM	9	44.0855	82.33	0.7813	0.0235	0.5923	0.0373	SB					IQPINHTTL	9	43.2329	55.78	0.9304	0.0071	0.6283	0.0282
SPPTNFNHL	9	48.054	966.91	0.5726	0.0728	0.3647	0.3097	SB					SGITNSASSTL	11	48.0967	40.52	0.8899	0.0113	0.6579	0.0194
SQLQAEHTL	9	45.8591	1927.62	0.5382	0.0918	0.3009	0.5804	SB					AALRDYETV	9	46.5949	93.92	0.7562	0.0281	0.5802	0.0408
SAIFNFQSL	9	51.1134	6.17	0.9888	0.0011	0.8318	0.0059	SB					NVHINDNVL	9	55.8574	1315.1	0.3762	0.1963	0.3362	0.4107
AAPAPSLWTL	10	44.7497	1809.88	0.4196	0.1565	0.3067	0.5505	SB					IAHLNNENL	9	44.906	33.6	0.9218	0.008	0.6752	0.0158
SSVFNVEMV	9	41.64	20.79	0.8919	0.0111	0.7195	0.0098	SB					YGPLNLLTF	9	42.5833	51.26	0.8747	0.0128	0.6361	0.0265
AMMAKAEYL	9	45.881	181.64	0.5704	0.0737	0.5192	0.0713	SB					KTISLTDFL	9	43.753	375.69	0.5604	0.0778	0.452	0.1421
YSPTGKEFV	9	44.1156	490.6	0.5555	0.0799	0.4274	0.1854	SB					SSIQNQMQS	9	42.9652	909.17	0.2817	0.3032	0.3704	0.2936
SASFNIIEF	9	48.039	323.32	0.6523	0.0493	0.4659	0.1223	SB					LSMRNTSVM	9	50.1879	13.99	0.8888	0.0114	0.7561	0.0086
SGPRDHVFI	9	50.4209	147.53	0.6925	0.0421	0.5384	0.0616	SB					SQISNTEFL	9	52.6183	5.51	0.9886	0.0012	0.8422	0.0055
LQGRNPETL	9	46.0071	345.91	0.6954	0.0416	0.4597	0.1304	SB					FVTSNTQEL	9	43.162	577.19	0.6011	0.0636	0.4124	0.2086
NKVSPQELI	9	47.895	24329.9	0.011	6.6754	0.0666	14.793	WB					ATVTGGAWYL	10	53.0418	8367.07	0.0577	1.7947	0.1652	2.6046
GALKNTDYF	9	52.704	17.35	0.9343	0.0067	0.7363	0.0093	SB					ISMFNGQLL	9	42.9599	31.23	0.8793	0.0124	0.6819	0.0146
SSGKNLFYL	9	46.0836	14.04	0.9556	0.0045	0.7558	0.0086	SB					TQGQNIQHL	9	47.3605	265.89	0.8361	0.0169	0.484	0.1046
IAARNQENL	9	64.0308	41.3	0.9153	0.0087	0.6561	0.0198	SB					YINKISSTL	9	44.7642	8563.62	0.1101	0.9489	0.1631	2.6872
YAPAPFLHI	9	51.0333	438	0.6582	0.0483	0.4379	0.1687	SB					SMLSNPDLM	9	49.5526	7.38	0.9615	0.0039	0.8153	0.0065
GVIILYDHV	9	40.8375	4270.47	0.0835	1.2548	0.2274	1.2326	WB					HSPTNTVHM	9	50.5709	26.17	0.9723	0.0028	0.6983	0.0123
FSPLNPVRV	9	44.1529	71.1	0.8835	0.0119	0.6059	0.0338	SB					SAPSYPMASL	10	49.0517	2714.9	0.307	0.2744	0.2693	0.8015
RGLENLTLL	9	45.1742	27.11	0.9409	0.006	0.695	0.0128	SB					AALLNFDEF	9	51.6083	12.72	0.95	0.0051	0.765	0.0082
SALQNVKRL	9	45.2323	47.36	0.9344	0.0067	0.6434	0.0247	SB					YTFVNPSVL	9	47.3452	11.65	0.9694	0.0031	0.7731	0.008
FSLTNGMYP	9	50.8417	288.62	0.339	0.2388	0.4764	0.112	SB					KQTINPILL	9	44.9839	657.62	0.635	0.0538	0.4003	0.2311
DVQLQESGPG	10	50.6176	42755.8	0	96	0.0145	73.0011	WB					TSPINPQHM	9	46.3418	57.43	0.9562	0.0045	0.6256	0.0288
ASYINPDHL	9	41.004	8.07	0.9877	0.0013	0.8071	0.0068	SB					KAPTNEFYA	9	52.652	61.43	0.7291	0.0343	0.6194	0.0303
SVVQNQQQV	9	44.8557	301.18	0.7211	0.0361	0.4725	0.1159	SB					IQLMNTAHL	9	43.5911	20.79	0.9251	0.0077	0.7196	0.0098
AAMVSKFFL	9	44.676	106.04	0.6757	0.0451	0.569	0.0451	SB					AMLTILHEI	9	41.62	477.52	0.4847	0.114	0.4299	0.1819
SQLLNLTQL	9	51.9924	11.96	0.978	0.0022	0.7706	0.008	SB					GSQGTNPHMI	10	40.7836	5354.71	0.1499	0.6795	0.2065	1.5454
SSPQNQEQI	9	42.9644	9.14	0.9903	0.001	0.7955	0.0072	SB					FSVENFDAL	9	52.2034	5.41	0.9818	0.0019	0.8439	0.0055
VTVENVQEL	9	46.5936	85.66	0.9081	0.0094	0.5887	0.0383	SB					NGYLEFDAL	9	52.2438	4329.65	0.1049	0.9943	0.2261	1.2494
RTVGNIEEL	9	44.7516	88.97	0.878	0.0125	0.5852	0.0392	SB					ATFEKESVM	9	45.8528	7662.83	0.1632	0.6251	0.1734	2.343
GSLRNLEEL	9	44.7467	10.35	0.9781	0.0022	0.784	0.0076	SB					LSNNNHTEI	9	45.1056	85.11	0.758	0.0277	0.5893	0.0381
SLGLNPYPGI	10	44.9164	2326.73	0.0452	2.2789	0.2835	0.6932	WB					FGPVNHEEL	9	54.1373	8.82	0.9707	0.003	0.7987	0.0071
KSLENILTL	9	46.8343	10.12	0.986	0.0014	0.7861	0.0075	SB					YSPVGKEYV	9	45.0814	121.86	0.7585	0.0275	0.5561	0.0502
SQLELKSLI	9	45.3349	1671.6	0.3659	0.2075	0.3141	0.5128	SB					IAVANAQELL	10	50.5639	109.37	0.6854	0.0434	0.5661	0.0463
GMLSNMISF	9	42.9464	415.24	0.4351	0.1444	0.4428	0.1584	SB					VAVRNLQEI	9	53.1289	7.56	0.9779	0.0023	0.813	0.0066
YSLGNTYTL	9	48.4659	6.24	0.9877	0.0013	0.8307	0.0059	SB					VSILNRQVL	9	51.6883	16.05	0.9643	0.0036	0.7435	0.009
YSLPHPKSADTLAM	14	42.9656	10833.8	0.0112	6.5916	0.1413	3.6731	WB					VTIRLLDVL	9	43.2976	510.87	0.4941	0.1093	0.4236	0.1907
FAHTNIESL	9	53.4847	5.68	0.9908	0.0009	0.8395	0.0056	SB					SMPRNTSYA	9	47.9767	100.24	0.5324	0.0937	0.5742	0.0431
SHVTNVDFL	9	51.8176	93.91	0.6448	0.0511	0.5802	0.0408	SB					FGPVDHEEL	9	51.6324	176.8	0.7296	0.0342	0.5217	0.0695
SAIVNLPGCSA	11	42.9471	223.55	0.3337	0.245	0.5	0.0885	SB					AQYGKLESM	9	44.006	2971.86	0.3358	0.2425	0.2609	0.8735
RQILNADAM	9	42.9618	11.52	0.9329	0.0069	0.7741	0.0079	SB					SSIQHTQEL	9	44.8472	130.87	0.8628	0.0141	0.5495	0.0548
TQSVNIEQL	9	64.1257	100.3	0.8882	0.0114	0.5741	0.0431	SB					GQNPTNAEVL	10	40.8927	1307.06	0.4287	0.1488	0.3368	0.4081
VMIPNVETI	9	44.8027	8.47	0.9753	0.0025	0.8026	0.0069	SB					KMATNTVYV	9	52.6973	30.56	0.8086	0.0199	0.6839	0.0143
RQLENGTTL	9	49.6103	26.22	0.9518	0.0049	0.6981	0.0124	SB					AMAEKVQHL	9	40.9253	5624.74	0.2346	0.3881	0.2019	1.6335
ISLKNSQEI	9	45.8965	11.72	0.974	0.0027	0.7725	0.008	SB					RSVPNVEEL	9	45.0371	17	0.9806	0.002	0.7381	0.0092
TQVSLKDQI	9	44.2953	2898.06	0.2681	0.3276	0.2632	0.8535	SB					FVHNNVISI	9	64.2215	151.09	0.7092	0.0389	0.5362	0.0627
ATVGPLVVYL	10	45.2787	11782	0.0563	1.842	0.1336	4.1316	WB					NQLALIEEL	9	64.1691	1559.95	0.3888	0.1841	0.3205	0.4823
SSLEMTTTF	9	52.7891	358.19	0.6596	0.048	0.4565	0.1353	SB					SQVTLREPL	9	48.0432	125.77	0.6624	0.0475	0.5532	0.0523
YNISNSSTF	9	56.3893	76.1	0.7937	0.0219	0.5996	0.0354	SB					TSFVNFTDI	9	43.1704	12.86	0.8858	0.0117	0.7639	0.0083
FHLQNGAVM	9	48.2354	247.15	0.4472	0.1359	0.4907	0.0979	SB					SGPPPPPTFF	10	40.9531	17013.8	0.1112	0.9391	0.0996	7.3749
NGPQNIYNL	9	64.2321	112.57	0.8539	0.015	0.5634	0.0473	SB					YSFLNSSLL	9	48.0438	5.67	0.9784	0.0022	0.8396	0.0056
ASIQNGKDSL	10	40.2107	28.01	0.9399	0.0061	0.692	0.0132	SB					AHINALEYI	9	42.9647	2497.77	0.1396	0.7347	0.277	0.7425
VSSRNVEEL	9	64.1646	39.05	0.9311	0.007	0.6613	0.0187	SB					KAILNGIDSI	10	44.1915	11.75	0.9069	0.0095	0.7723	0.008
VTNLNPDFI	9	46.628	54.18	0.8105	0.0197	0.631	0.0276	SB					TAPPNFNHM	9	40.7602	26.75	0.9763	0.0024	0.6962	0.0126
VALLNLENM	9	50.0425	6.93	0.9798	0.0021	0.821	0.0063	SB					SPYVGLVYM	9	40.8004	3061.21	0.2327	0.3915	0.2582	0.8971
ATLEKQETI	9	45.0164	1383.65	0.4875	0.1126	0.3316	0.432	SB					GTVMNGLSHL	10	64.1539	1874.11	0.2355	0.3865	0.3035	0.567
VSARVQMLI	9	47.7433	13290.7	0.0336	2.9077	0.1225	4.9507	WB					TAVISYDYL	9	41.0174	26.51	0.8426	0.0162	0.6971	0.0125
VSARNIMLL	9	45.0265	121.19	0.7813	0.0235	0.5566	0.0499	SB					VQHASVQYI	9	44.9563	814.15	0.459	0.1277	0.3806	0.2711
VALINKDFL	9	53.0415	4.51	0.99	0.001	0.8607	0.0049	SB					SAVLNGFSHL	10	46.239	21.99	0.8967	0.0106	0.7144	0.0101
VGIRNTFLL	9	51.4629	18.33	0.9272	0.0074	0.7312	0.0094	SB					RAIENIDTL	9	55.5153	2.9	0.998	0.0002	0.9015	0.0035
ELLMNADVI	9	42.9675	531.09	0.263	0.3369	0.42	0.1957	SB					SQKENINVL	9	44.4797	433.28	0.7638	0.0263	0.4389	0.1666
SAIMNPASKV	10	41.1496	59.9	0.7047	0.0399	0.6217	0.0297	SB					SLIILKQVM	9	49.1316	2008.83	0.2897	0.2932	0.2971	0.5999
SSVSNVNLTL	10	48.1082	40.88	0.9163	0.0086	0.657	0.0196	SB					IGFENHETV	9	45.0091	19.25	0.9381	0.0063	0.7266	0.0096
VGIENFELL	9	49.0946	10.73	0.9727	0.0028	0.7807	0.0077	SB					FSLVGFTQM	9	44.0831	75.47	0.7596	0.0273	0.6004	0.0352
VVVENITLM	9	44.9598	135.77	0.766	0.0258	0.5461	0.0571	SB					SSFQNHVNL	9	46.4861	10.36	0.9808	0.002	0.7839	0.0076
GQVKNDLFL	9	50.181	263.87	0.6432	0.0515	0.4847	0.1039	SB					WSEVNQAVL	9	44.567	412.55	0.4689	0.122	0.4434	0.1572
FQALNAEKL	9	45.426	106.47	0.7984	0.0212	0.5686	0.0453	SB					NSIRNLDTI	9	53.8812	4.07	0.9881	0.0012	0.8702	0.0046
STHTNGGLTF	10	42.967	3155.75	0.1907	0.5125	0.2553	0.9284	WB					SSLHNVYLI	9	47.1294	9.17	0.9389	0.0062	0.7952	0.0072
FALNNPEMV	9	51.3029	15.8	0.9264	0.0075	0.7449	0.009	SB					SNISLVHYI	9	53.7656	224.23	0.6515	0.0495	0.4997	0.0888
LGVSNFNHF	9	56.254	253.67	0.5578	0.0789	0.4883	0.1003	SB					SLLNKQETL	9	57.4896	3563.73	0.2779	0.3099	0.2441	1.0484
SALGNQSGSTL	11	40.8273	60.82	0.902	0.01	0.6203	0.03	SB					YVASNQHEV	9	64.1203	380.44	0.6057	0.0623	0.4509	0.1438
SQQQNFIVA	9	65.4103	694.43	0.3994	0.174	0.3953	0.2404	SB					TTHSNMQVI	9	50.27	158.67	0.7573	0.0278	0.5317	0.0648
TATMNLDRI	9	45.0947	28.89	0.8196	0.0187	0.6891	0.0136	SB					FAPPQGSPVM	10	45.9628	1436.8	0.4014	0.1723	0.3281	0.4479
IFVSNIDNL	9	52.9954	912.08	0.301	0.281	0.3701	0.2943	SB					TQFINPETP	9	44.8158	2679.53	0.2515	0.3577	0.2705	0.7921
FGGHNEDFI	9	42.2606	78.7	0.5367	0.0923	0.5965	0.0362	SB					GTFGGANVPNL	11	49.7757	8168.22	0.0747	1.4076	0.1674	2.5189
YAVGNHDFI	9	44.9076	3.49	0.9844	0.0016	0.8846	0.004	SB					AGLRNAVSQM	10	42.9656	232.8	0.5819	0.0692	0.4963	0.0922
FGPTDKEEI	9	45.0123	499.01	0.5738	0.0723	0.4258	0.1876	SB					SAILNEWTL	9	48.908	6.31	0.9829	0.0017	0.8298	0.006
TAFNNLENL	9	50.9689	13.52	0.9664	0.0034	0.7593	0.0084	SB					VGVWNVPYI	9	42.4035	51.23	0.7109	0.0385	0.6362	0.0264
SQIRNMASL	9	41.2974	8.89	0.9748	0.0026	0.7981	0.0071	SB					FALINKLDI	9	49.7019	12.72	0.8715	0.0132	0.765	0.0082
LSLPNTDYI	9	52.0666	5.17	0.9789	0.0022	0.8482	0.0053	SB					NSLLNNMEL	9	46.4935	38.82	0.9029	0.0099	0.6618	0.0186
GQGRNPFFL	9	42.8166	551.75	0.536	0.0925	0.4165	0.2009	SB					YVFSNFTAV	9	42.3369	42.23	0.7412	0.0315	0.6541	0.0204
SGVSNFAQLI	10	53.1488	94.71	0.5267	0.0955	0.5794	0.0411	SB					FAPNSVHYL	9	42.9466	76.86	0.8969	0.0105	0.5987	0.0357
RSLYNVNGL	9	64.139	148.3	0.7039	0.0401	0.538	0.0619	SB					VQYPNSINL	9	45.4537	249.64	0.8214	0.0185	0.4898	0.0988
FALTLQETL	9	47.4042	30.79	0.9179	0.0084	0.6833	0.0144	SB					KSIVNQVFL	9	51.0084	5.55	0.9901	0.001	0.8416	0.0056
GLLQNLQHL	9	39.9808	374.42	0.6675	0.0466	0.4524	0.1416	SB					FSKVNIQVL	9	43.6294	90.12	0.8588	0.0145	0.584	0.0395
IQGILIEHL	9	43.3239	4569.54	0.2422	0.3745	0.2211	1.3164	SB					YSLFASTML	9	50.6437	1407.28	0.2444	0.3705	0.33	0.4391
YAPEDTEVL	9	40.6672	269.72	0.8	0.021	0.4827	0.1059	SB					RSPDGYLQI	9	53.0105	5049.29	0.272	0.3207	0.2119	1.4541
FGATNWDLI	9	49.4537	10.23	0.8251	0.0181	0.7851	0.0075	SB					GVMLNTERL	9	41.2592	292.03	0.647	0.0504	0.4753	0.1131
FVARNGPEF	9	52.9778	1535.56	0.3404	0.2372	0.3219	0.4757	SB					TVFKNVDLL	9	41.4862	57.85	0.8551	0.0148	0.625	0.029
TAIENATVAF	10	53.9002	291.91	0.618	0.0587	0.4754	0.113	SB					YGIRNSLLI	9	50.1785	8.57	0.9533	0.0048	0.8014	0.007
SSPQHPASLL	10	47.6956	3523.32	0.3211	0.259	0.2452	1.0382	SB					TTPQNQVDM	9	41.1469	332.46	0.7445	0.0307	0.4633	0.1248
RSAENFTVL	9	51.2505	20.62	0.9599	0.0041	0.7203	0.0098	SB					FQAEGITHM	9	52.5545	1720.61	0.4386	0.1419	0.3114	0.5265
FAPYNKPSL	9	50.4719	34.78	0.9557	0.0045	0.672	0.0165	SB					FAQPPGATNM	10	48.3688	4642.65	0.2214	0.4193	0.2197	1.3372
KSVANLEYL	9	64.177	5.02	0.9889	0.0011	0.8508	0.0052	SB					FSVTNPHTM	9	53.1326	7.03	0.9874	0.0013	0.8198	0.0063
YIIGQKGSGI	10	61.323	26491.8	0.003	14.931	0.0587	17.9152	WB					TQNVNQAKM	9	43.0336	194.88	0.7526	0.0289	0.5127	0.0769
ASLSNRLYI	9	63.8297	6.33	0.971	0.003	0.8294	0.006	SB					AAMLNYTHI	9	40.2733	3.7	0.987	0.0013	0.879	0.0042
IQPINHTTL	9	43.2329	55.78	0.9304	0.0071	0.6283	0.0282	SB					FSPENTELL	9	45.8554	26.65	0.9578	0.0043	0.6966	0.0126
LQHSPTILQ	9	51.7723	39807.7	0.0008	28.5909	0.0211	56.7581	WB					AAYGAQPSATL	11	44.1664	9165.13	0.1187	0.878	0.1568	2.9289
SGITNSASSTL	11	48.0967	40.52	0.8899	0.0113	0.6579	0.0194	SB					AILELDTKM	9	62.599	12538.5	0.0573	1.8065	0.1278	4.5328
AALRDYETV	9	46.5949	93.92	0.7562	0.0281	0.5802	0.0408	SB					FSNVNLKEV	9	46.801	135.71	0.6535	0.0491	0.5462	0.0571
NVHINDNVL	9	55.8574	1315.1	0.3762	0.1963	0.3362	0.4107	SB					VGPENMQIM	9	45.2713	53.07	0.9108	0.0091	0.6329	0.0272
IAHLNNENL	9	44.906	33.6	0.9218	0.008	0.6752	0.0158	SB					SQNRNGEFV	9	49.2919	35.15	0.8488	0.0155	0.671	0.0167
YGPLNLLTF	9	42.5833	51.26	0.8747	0.0128	0.6361	0.0265	SB					SNGVNQERF	9	45.517	4333.59	0.1677	0.6067	0.226	1.2505
KTISLTDFL	9	43.753	375.69	0.5604	0.0778	0.452	0.1421	SB					LMVTNDGATI	10	45.8105	279.97	0.1706	0.5951	0.4792	0.1093
SSIQNQMQS	9	42.9652	909.17	0.2817	0.3032	0.3704	0.2936	SB					ATVVNDERF	9	45.1081	733.85	0.4401	0.1409	0.3902	0.2499
LSMRNTSVM	9	50.1879	13.99	0.8888	0.0114	0.7561	0.0086	SB					GMPGVNIAYL	10	41.2918	150.02	0.4712	0.1208	0.5369	0.0624
SQISNTEFL	9	52.6183	5.51	0.9886	0.0012	0.8422	0.0055	SB					ASLVNSPSYL	10	53.0362	18.67	0.9304	0.0071	0.7295	0.0095
FVTSNTQEL	9	43.162	577.19	0.6011	0.0636	0.4124	0.2086	SB					YMGTNIHSL	9	41.2494	34.27	0.9018	0.01	0.6733	0.0162
ATVTGGAWYL	10	53.0418	8367.07	0.0577	1.7947	0.1652	2.6046	WB					SAPRDLFDM	9	46.6242	221.94	0.6441	0.0513	0.5007	0.0879
ISMFNGQLL	9	42.9599	31.23	0.8793	0.0124	0.6819	0.0146	SB					NMPVSFEVI	9	48.5838	522.26	0.3414	0.2361	0.4216	0.1935
TQGQNIQHL	9	47.3605	265.89	0.8361	0.0169	0.484	0.1046	SB					GGIRNGSYDI	10	41.0196	191.56	0.3925	0.1805	0.5143	0.0755
YINKISSTL	9	44.7642	8563.62	0.1101	0.9489	0.1631	2.6872	WB					YALGTSGHVF	10	40.9157	4053.38	0.1178	0.8843	0.2322	1.1736
SMLSNPDLM	9	49.5526	7.38	0.9615	0.0039	0.8153	0.0065	SB					AALMNQQFL	9	47.9146	4.59	0.9934	0.0007	0.8591	0.0049
HSPTNTVHM	9	50.5709	26.17	0.9723	0.0028	0.6983	0.0123	SB					TAILNDYEL	9	41.9494	7.63	0.9781	0.0022	0.8122	0.0066
SAPSYPMASL	10	49.0517	2714.9	0.307	0.2744	0.2693	0.8015	SB					SALVKEEYL	9	45.8828	63.03	0.8863	0.0116	0.617	0.0309
AALLNFDEF	9	51.6083	12.72	0.95	0.0051	0.765	0.0082	SB					FSPMGVDHM	9	39.3686	77.9	0.8195	0.0187	0.5975	0.036
YTFVNPSVL	9	47.3452	11.65	0.9694	0.0031	0.7731	0.008	SB					IQAENAEFM	9	51.7534	37.46	0.8764	0.0127	0.6651	0.0179
KQTINPILL	9	44.9839	657.62	0.635	0.0538	0.4003	0.2311	SB					AMNVNDLFL	9	45.1831	47.82	0.7763	0.0241	0.6426	0.025
TSPINPQHM	9	46.3418	57.43	0.9562	0.0045	0.6256	0.0288	SB					FSITDQQTL	9	46.4533	95.5	0.8569	0.0147	0.5786	0.0414
KAPTNEFYA	9	52.652	61.43	0.7291	0.0343	0.6194	0.0303	SB					AILELDEHL	9	53.2091	6829.48	0.157	0.6505	0.184	2.0343
IQLMNTAHL	9	43.5911	20.79	0.9251	0.0077	0.7196	0.0098	SB					FAPKNIYSI	9	53.713	8.51	0.9836	0.0017	0.8021	0.0069
AMLTILHEI	9	41.62	477.52	0.4847	0.114	0.4299	0.1819	SB					RSLLNSHIL	9	44.9328	18.18	0.9602	0.0041	0.7319	0.0094
GSQGTNPHMI	10	40.7836	5354.71	0.1499	0.6795	0.2065	1.5454	WB					AMLENLLSM	9	41.6336	18.19	0.9293	0.0072	0.7319	0.0094
FSVENFDAL	9	52.2034	5.41	0.9818	0.0019	0.8439	0.0055	SB					SQHVNLDQL	9	51.9552	10.46	0.9752	0.0025	0.783	0.0076
NGYLEFDAL	9	52.2438	4329.65	0.1049	0.9943	0.2261	1.2494	WB					YALDLKAFL	9	43.8626	452.58	0.5701	0.0738	0.4348	0.1749
ATFEKESVM	9	45.8528	7662.83	0.1632	0.6251	0.1734	2.343	WB					IAPKNPTISL	10	43.1315	141.59	0.8846	0.0118	0.5422	0.0598
LSNNNHTEI	9	45.1056	85.11	0.758	0.0277	0.5893	0.0381	SB					FSLGNLEQF	9	53.7399	65.82	0.83	0.0176	0.613	0.0319
FGPVNHEEL	9	54.1373	8.82	0.9707	0.003	0.7987	0.0071	SB					ISPTSKFQM	9	43.799	1779.05	0.4539	0.1313	0.3083	0.5423
YSPVGKEYV	9	45.0814	121.86	0.7585	0.0275	0.5561	0.0502	SB					AGQFNQDYL	9	40.528	29.53	0.9107	0.0091	0.6871	0.0139
IAVANAQELL	10	50.5639	109.37	0.6854	0.0434	0.5661	0.0463	SB					FSVEGQLEF	9	39.0929	3769.37	0.2095	0.4539	0.2389	1.0985
VAVRNLQEI	9	53.1289	7.56	0.9779	0.0023	0.813	0.0066	SB					HSLINPEVF	9	44.6903	85.94	0.8431	0.0162	0.5884	0.0384
VSILNRQVL	9	51.6883	16.05	0.9643	0.0036	0.7435	0.009	SB					RIVENVNVI	9	42.4283	137.15	0.7191	0.0366	0.5452	0.0577
VTIRLLDVL	9	43.2976	510.87	0.4941	0.1093	0.4236	0.1907	SB					VALRNLEQI	9	44.1348	5.42	0.9876	0.0013	0.8438	0.0055
SMPRNTSYA	9	47.9767	100.24	0.5324	0.0937	0.5742	0.0431	SB					NAVRNLQEL	9	42.9554	22.79	0.9475	0.0054	0.7111	0.0106
FGPVDHEEL	9	51.6324	176.8	0.7296	0.0342	0.5217	0.0695	SB					RIIANVEEI	9	45.0316	18.82	0.9072	0.0095	0.7287	0.0095
AQYGKLESM	9	44.006	2971.86	0.3358	0.2425	0.2609	0.8735	SB					RNISNQLVI	9	40.8238	84.33	0.7756	0.0242	0.5901	0.0379
SSIQHTQEL	9	44.8472	130.87	0.8628	0.0141	0.5495	0.0548	SB					RLNLNNTVL	9	40.9282	848.59	0.4258	0.1511	0.3767	0.2795
GQNPTNAEVL	10	40.8927	1307.06	0.4287	0.1488	0.3368	0.4081	SB					MAPENGYLM	9	40.8139	16.54	0.9485	0.0053	0.7407	0.0091
KMATNTVYV	9	52.6973	30.56	0.8086	0.0199	0.6839	0.0143	SB					RQVENVLSL	9	46.2307	59.57	0.9077	0.0094	0.6223	0.0296
AMAEKVQHL	9	40.9253	5624.74	0.2346	0.3881	0.2019	1.6335	SB					SLIRILQTI	9	44.3968	1141.83	0.3717	0.2006	0.3493	0.3629
RSVPNVEEL	9	45.0371	17	0.9806	0.002	0.7381	0.0092	SB					VTIRLLETI	9	44.0389	367.57	0.5331	0.0934	0.4541	0.139
FVHNNVISI	9	64.2215	151.09	0.7092	0.0389	0.5362	0.0627	SB					YSSFSSPHM	9	45.1872	3908.37	0.1768	0.5695	0.2356	1.1358
NQLALIEEL	9	64.1691	1559.95	0.3888	0.1841	0.3205	0.4823	SB					SSLLNIQHF	9	50.0578	35.29	0.9232	0.0079	0.6706	0.0168
SQVTLREPL	9	48.0432	125.77	0.6624	0.0475	0.5532	0.0523	SB					AMFENFVSV	9	43.2157	45.55	0.8059	0.0203	0.647	0.0232
TSFVNFTDI	9	43.1704	12.86	0.8858	0.0117	0.7639	0.0083	SB					HAIENIDTF	9	48.5217	15.39	0.9613	0.004	0.7474	0.0089
SGPPPPPTFF	10	40.9531	17013.8	0.1112	0.9391	0.0996	7.3749	WB					SAPLPPSIFM	10	42.5419	2247.96	0.4117	0.1633	0.2867	0.6714
YSFLNSSLL	9	48.0438	5.67	0.9784	0.0022	0.8396	0.0056	SB					TTQRNVEVI	9	50.9064	136.73	0.7704	0.0249	0.5455	0.0576
AHINALEYI	9	42.9647	2497.77	0.1396	0.7347	0.277	0.7425	WB					SSIVNSIQVL	10	51.7917	15.72	0.9553	0.0046	0.7454	0.0089
GGLLGMPGVNI	11	40.7222	23571.2	0.0046	11.5731	0.0695	13.786	WB					SSPSNKFFF	9	51.4329	63.84	0.8498	0.0154	0.6159	0.0312
KAILNGIDSI	10	44.1915	11.75	0.9069	0.0095	0.7723	0.008	SB					IQPDNIVYV	9	43.7436	397.12	0.7166	0.0372	0.4469	0.1499
TAPPNFNHM	9	40.7602	26.75	0.9763	0.0024	0.6962	0.0126	SB					FVIRNIVEA	9	42.1901	284.9	0.4521	0.1325	0.4776	0.1108
VSTFMAEML	9	53.1417	7800.02	0.0498	2.0755	0.1717	2.3906	WB					YTLGNIYAM	9	42.9656	33.73	0.8381	0.0167	0.6748	0.0159
SPYVGLVYM	9	40.8004	3061.21	0.2327	0.3915	0.2582	0.8971	SB					FTWTGAEHI	9	40.9789	1738.82	0.2354	0.3868	0.3104	0.5315
GTVMNGLSHL	10	64.1539	1874.11	0.2355	0.3865	0.3035	0.567	SB					NSMVLFDHV	9	44.3	180.28	0.3978	0.1754	0.5199	0.0707
TAVISYDYL	9	41.0174	26.51	0.8426	0.0162	0.6971	0.0125	SB					SQLQDTQEL	9	47.9066	927.26	0.6543	0.049	0.3685	0.2976
GPTQGSVGQTI	11	47.2535	29981.6	0.0044	11.8553	0.0473	24.1638	WB					RMIQNQNAA	9	44.4752	276.9	0.388	0.1849	0.4802	0.1083
VQHASVQYI	9	44.9563	814.15	0.459	0.1277	0.3806	0.2711	SB					LGPPPPSFHL	10	47.2674	16679.4	0.0873	1.1928	0.1015	7.121
SAVLNGFSHL	10	46.239	21.99	0.8967	0.0106	0.7144	0.0101	SB					VQVEDIVFL	9	52.7238	1860.21	0.4281	0.1493	0.3042	0.5635
RAIENIDTL	9	55.5153	2.9	0.998	0.0002	0.9015	0.0035	SB					YSHVDLVVM	9	40.5774	96.08	0.7482	0.0299	0.5781	0.0416
SQKENINVL	9	44.4797	433.28	0.7638	0.0263	0.4389	0.1666	SB					SQMTNLQEL	9	45.1956	8.33	0.9827	0.0018	0.804	0.0069
SLIILKQVM	9	49.1316	2008.83	0.2897	0.2932	0.2971	0.5999	SB					MVLVNNVEM	9	40.8506	43.41	0.7931	0.0219	0.6515	0.0214
DGLDAASYYA	10	69.5685	34281.2	0.0003	40.0455	0.0349	35.0477	WB					GKMELQETI	9	49.891	7428.94	0.0979	1.0697	0.1762	2.2599
IGFENHETV	9	45.0091	19.25	0.9381	0.0063	0.7266	0.0096	SB					FGLQNFPEL	9	44.9628	12.29	0.9626	0.0038	0.7681	0.0081
FSLVGFTQM	9	44.0831	75.47	0.7596	0.0273	0.6004	0.0352	SB					LAYENVKEV	9	46.1082	446.45	0.5428	0.0903	0.4361	0.1723
SSFQNHVNL	9	46.4861	10.36	0.9808	0.002	0.7839	0.0076	SB					RTVENVTVF	9	44.7955	223.98	0.7181	0.0368	0.4998	0.0887
WSEVNQAVL	9	44.567	412.55	0.4689	0.122	0.4434	0.1572	SB					VVVDMQIVM	9	49.1269	8222.75	0.0921	1.1354	0.1668	2.5426
NSIRNLDTI	9	53.8812	4.07	0.9881	0.0012	0.8702	0.0046	SB					GIVTNWDDM	9	52.7727	663.94	0.2271	0.4029	0.3994	0.2327
SSLHNVYLI	9	47.1294	9.17	0.9389	0.0062	0.7952	0.0072	SB					SSFVDHDFL	9	44.6902	21.13	0.8941	0.0108	0.718	0.0099
SNISLVHYI	9	53.7656	224.23	0.6515	0.0495	0.4997	0.0888	SB					GMKLNLDYL	9	47.0681	66.95	0.754	0.0286	0.6115	0.0323
SLLNKQETL	9	57.4896	3563.73	0.2779	0.3099	0.2441	1.0484	SB					SQFPNAEKM	9	49.1122	41.75	0.9416	0.006	0.6551	0.02
YVASNQHEV	9	64.1203	380.44	0.6057	0.0623	0.4509	0.1438	SB					SSVKNEEQF	9	56.2044	109.08	0.8311	0.0175	0.5663	0.0462
TTHSNMQVI	9	50.27	158.67	0.7573	0.0278	0.5317	0.0648	SB					KMISNPTNF	9	42.9459	240.93	0.6471	0.0504	0.4931	0.0954
FAPPQGSPVM	10	45.9628	1436.8	0.4014	0.1723	0.3281	0.4479	SB					AAVNSPSEFM	10	51.7041	1661	0.2437	0.3716	0.3147	0.5098
TQFINPETP	9	44.8158	2679.53	0.2515	0.3577	0.2705	0.7921	SB					NGFINEDFI	9	52.9759	26.64	0.7411	0.0315	0.6966	0.0126
GTFGGANVPNL	11	49.7757	8168.22	0.0747	1.4076	0.1674	2.5189	WB					QSAPGTTMFL	10	44.4475	12651.3	0.0526	1.9672	0.127	4.5971
AGLRNAVSQM	10	42.9656	232.8	0.5819	0.0692	0.4963	0.0922	SB					QTVENVEHL	9	50.7319	90.49	0.8962	0.0106	0.5836	0.0396
SAILNEWTL	9	48.908	6.31	0.9829	0.0017	0.8298	0.006	SB					TVISNAVDHI	10	48.2165	180.53	0.5392	0.0915	0.5198	0.0708
VGVWNVPYI	9	42.4035	51.23	0.7109	0.0385	0.6362	0.0264	SB					AAVQNPALTAL	11	48.3739	58.54	0.8901	0.0112	0.6239	0.0292
FALINKLDI	9	49.7019	12.72	0.8715	0.0132	0.765	0.0082	SB					YSITNTEEL	9	48.8095	3.03	0.9977	0.0002	0.8976	0.0036
NSLLNNMEL	9	46.4935	38.82	0.9029	0.0099	0.6618	0.0186	SB					QAGPVVNTHM	10	41.7646	10782.9	0.0821	1.2779	0.1418	3.6488
YVFSNFTAV	9	42.3369	42.23	0.7412	0.0315	0.6541	0.0204	SB					YGLDNEVFL	9	49.0022	39.16	0.9122	0.009	0.661	0.0188
FAPNSVHYL	9	42.9466	76.86	0.8969	0.0105	0.5987	0.0357	SB					SAPKYIDYL	9	50.8838	42.7	0.9216	0.008	0.653	0.0208
TPVITGAPYE	10	53.1224	38942.1	0.0001	53.3333	0.0231	52.6032	WB					AGPENIPEPM	10	49.0311	25.61	0.9203	0.0081	0.7003	0.0121
VQYPNSINL	9	45.4537	249.64	0.8214	0.0185	0.4898	0.0988	SB					SSLMKVENM	9	49.0425	352.6	0.612	0.0604	0.4579	0.1331
KSIVNQVFL	9	51.0084	5.55	0.9901	0.001	0.8416	0.0056	SB					SSLFNDFGAL	10	42.9472	126.15	0.4029	0.171	0.5529	0.0524
HPDLLIQVL	9	43.6294	26652	0.0311	3.0955	0.0581	18.1654	WB					YAADNQIYI	9	44.057	12.61	0.9579	0.0043	0.7658	0.0082
FSKVNIQVL	9	43.6294	90.12	0.8588	0.0145	0.584	0.0395	SB					SQLEKTFAM	9	45.0318	1119.49	0.4796	0.1166	0.3511	0.3566
YSLFASTML	9	50.6437	1407.28	0.2444	0.3705	0.33	0.4391	SB					HQMQLVDSI	9	64.4256	367.6	0.5485	0.0859	0.4541	0.139
RSPDGYLQI	9	53.0105	5049.29	0.272	0.3207	0.2119	1.4541	SB					ISGVNRYYV	9	51.4153	29.76	0.7176	0.0369	0.6864	0.014
GVMLNTERL	9	41.2592	292.03	0.647	0.0504	0.4753	0.1131	SB					AGTRNIYYL	9	51.6565	25.27	0.9228	0.0079	0.7015	0.0119
TVFKNVDLL	9	41.4862	57.85	0.8551	0.0148	0.625	0.029	SB					QQVINIDQL	9	49.1508	67.34	0.8992	0.0103	0.6109	0.0325
YGIRNSLLI	9	50.1785	8.57	0.9533	0.0048	0.8014	0.007	SB					IISPNFSFM	9	42.9633	935.77	0.3374	0.2407	0.3677	0.2995
AGSLILPAPPI	11	63.6403	10231	0.009	7.6468	0.1466	3.3957	WB					LGLQNLYHL	9	51.2102	42.16	0.889	0.0114	0.6542	0.0203
TTPQNQVDM	9	41.1469	332.46	0.7445	0.0307	0.4633	0.1248	SB					IGIENIHYL	9	51.5501	7.1	0.9909	0.0009	0.8188	0.0064
FQAEGITHM	9	52.5545	1720.61	0.4386	0.1419	0.3114	0.5265	SB					YSLNAGSLTM	10	52.8124	1753.48	0.1757	0.574	0.3097	0.5355
FAQPPGATNM	10	48.3688	4642.65	0.2214	0.4193	0.2197	1.3372	SB					ISMFNGQFL	9	42.9478	11.81	0.9377	0.0064	0.7718	0.008
FSVTNPHTM	9	53.1326	7.03	0.9874	0.0013	0.8198	0.0063	SB					LSDIHIDIM	9	43.3828	4888.71	0.1477	0.6886	0.2149	1.4059
TQNVNQAKM	9	43.0336	194.88	0.7526	0.0289	0.5127	0.0769	SB					LAIRNDEEL	9	53.2165	15.79	0.9471	0.0054	0.745	0.0089
AAMLNYTHI	9	40.2733	3.7	0.987	0.0013	0.879	0.0042	SB					TLISLMEHL	9	45.9082	2446.36	0.2365	0.3848	0.2789	0.7279
FSPENTELL	9	45.8554	26.65	0.9578	0.0043	0.6966	0.0126	SB					SSIQNPKVSL	10	44.8582	49.65	0.938	0.0063	0.6391	0.0258
AAYGAQPSATL	11	44.1664	9165.13	0.1187	0.878	0.1568	2.9289	WB					SQVEQQELI	9	49.0957	1779.67	0.3533	0.2222	0.3083	0.5425
AILELDTKM	9	62.599	12538.5	0.0573	1.8065	0.1278	4.5328	WB					SGQPVEKSQL	10	65.0521	13927.3	0.0914	1.1434	0.1181	5.3303
FSNVNLKEV	9	46.801	135.71	0.6535	0.0491	0.5462	0.0571	SB					ESLRNDQVL	9	42.9606	444.85	0.6309	0.055	0.4364	0.1716
VGPENMQIM	9	45.2713	53.07	0.9108	0.0091	0.6329	0.0272	SB					VQLENQMVL	9	52.9682	61.33	0.9104	0.0092	0.6196	0.0302
SQNRNGEFV	9	49.2919	35.15	0.8488	0.0155	0.671	0.0167	SB					YALLFGDYL	9	52.4026	17.66	0.8772	0.0126	0.7346	0.0093
SNGVNQERF	9	45.517	4333.59	0.1677	0.6067	0.226	1.2505	WB					RLITNSEEI	9	45.4033	23.21	0.9008	0.0101	0.7094	0.0108
LMVTNDGATI	10	45.8105	279.97	0.1706	0.5951	0.4792	0.1093	WB					AAVENLPTFL	10	51.637	26.61	0.942	0.0059	0.6967	0.0125
ATVVNDERF	9	45.1081	733.85	0.4401	0.1409	0.3902	0.2499	SB					LVIFNQEVI	9	47.6678	72.62	0.6884	0.0428	0.6039	0.0343
GMPGVNIAYL	10	41.2918	150.02	0.4712	0.1208	0.5369	0.0624	SB					VFLINQDLI	9	47.7027	330.82	0.3015	0.2803	0.4638	0.1244
ASLVNSPSYL	10	53.0362	18.67	0.9304	0.0071	0.7295	0.0095	SB					TSIPNFSYM	9	49.0161	6.45	0.9831	0.0017	0.8278	0.006
YMGTNIHSL	9	41.2494	34.27	0.9018	0.01	0.6733	0.0162	SB					FMATNPEHL	9	47.9837	24.08	0.9126	0.0089	0.706	0.0113
SAPRDLFDM	9	46.6242	221.94	0.6441	0.0513	0.5007	0.0879	SB					TSVENHEFL	9	44.2951	6.01	0.99	0.001	0.8343	0.0058
GGKSPDTNYL	10	48.5827	28660.2	0.0088	7.7608	0.0514	21.6206	WB					SAPRPSSQFV	10	44.7749	2084.69	0.2572	0.3473	0.2937	0.6234
AVCGSVSTQSL	11	43.6419	28887.7	0.0059	9.9429	0.0507	22.0493	WB					YQHIGLVVM	9	44.8016	573.39	0.5376	0.092	0.413	0.2075
NMPVSFEVI	9	48.5838	522.26	0.3414	0.2361	0.4216	0.1935	SB					ATISNDGATIL	11	45.8855	499.06	0.5611	0.0776	0.4258	0.1876
GGIRNGSYDI	10	41.0196	191.56	0.3925	0.1805	0.5143	0.0755	SB					VQQFNLDVI	9	53.8894	62.3	0.7531	0.0288	0.6181	0.0306
YALGTSGHVF	10	40.9157	4053.38	0.1178	0.8843	0.2322	1.1736	WB					SAPVNFISAGL	11	52.0923	27.27	0.9385	0.0063	0.6945	0.0129
AALMNQQFL	9	47.9146	4.59	0.9934	0.0007	0.8591	0.0049	SB					IGIANFAEQI	10	44.0985	62.52	0.5453	0.0887	0.6178	0.0307
TAILNDYEL	9	41.9494	7.63	0.9781	0.0022	0.8122	0.0066	SB					VQIKNDVFI	9	50.593	17.34	0.925	0.0077	0.7363	0.0093
TLIERGESF	9	47.8411	15190.5	0.0458	2.2496	0.1101	6.1074	WB					KALQFLEQV	9	41.2267	966.85	0.4082	0.1664	0.3647	0.3097
SALVKEEYL	9	45.8828	63.03	0.8863	0.0116	0.617	0.0309	SB					SAPQNGFWAV	10	52.1795	32.54	0.853	0.0151	0.6781	0.0152
FSPMGVDHM	9	39.3686	77.9	0.8195	0.0187	0.5975	0.036	SB					AVNMNLHYV	9	51.792	161.42	0.6503	0.0497	0.5301	0.0656
IQAENAEFM	9	51.7534	37.46	0.8764	0.0127	0.6651	0.0179	SB					FAPVNVTTEV	10	53.6368	24.88	0.8689	0.0134	0.703	0.0117
AMNVNDLFL	9	45.1831	47.82	0.7763	0.0241	0.6426	0.025	SB					RSIQNAQFL	9	41.8593	7.24	0.9859	0.0014	0.817	0.0064
FSITDQQTL	9	46.4533	95.5	0.8569	0.0147	0.5786	0.0414	SB					YQVLNEVVI	9	64.0672	24.54	0.8781	0.0125	0.7042	0.0115
AILELDEHL	9	53.2091	6829.48	0.157	0.6505	0.184	2.0343	WB					FALANEHYL	9	45.1817	4.21	0.9884	0.0012	0.8672	0.0047
FAPKNIYSI	9	53.713	8.51	0.9836	0.0017	0.8021	0.0069	SB					NSLTWKDTL	9	42.9663	2176.19	0.286	0.2972	0.2897	0.6507
RSLLNSHIL	9	44.9328	18.18	0.9602	0.0041	0.7319	0.0094	SB					FGLSNYHQL	9	47.5299	11.52	0.9766	0.0024	0.7741	0.0079
AMLENLLSM	9	41.6336	18.19	0.9293	0.0072	0.7319	0.0094	SB					SQVLNFEEI	9	42.966	6.3	0.9752	0.0025	0.8299	0.006
QHSVQVDQL	9	52.4951	27122.7	0.0112	6.6115	0.0565	18.8848	WB					FSGHNLEYL	9	49.9822	12.24	0.9513	0.005	0.7685	0.0081
SQHVNLDQL	9	51.9552	10.46	0.9752	0.0025	0.783	0.0076	SB					AQILNQVMM	9	42.9673	24.67	0.9553	0.0046	0.7037	0.0116
YALDLKAFL	9	43.8626	452.58	0.5701	0.0738	0.4348	0.1749	SB					LINQNSDYL	9	41.7937	117.15	0.6676	0.0466	0.5597	0.0487
IAPKNPTISL	10	43.1315	141.59	0.8846	0.0118	0.5422	0.0598	SB					QGPFNNQEM	9	42.9509	284.82	0.7323	0.0335	0.4776	0.1108
ALPKAVVKLD	10	40.8202	39321.9	0.0007	28.9697	0.0222	54.3497	WB					YMSVADEHL	9	45.0128	2978.36	0.1381	0.7441	0.2607	0.8753
FGNYNQQPS	9	42.9662	3309.83	0.025	3.6756	0.2509	0.979	WB					SQIKLESEM	9	45.2388	922.21	0.5501	0.0845	0.369	0.2965
NPTANMIFF	9	49.4007	22615.1	0.0073	8.7316	0.0733	12.6303	WB					FTIENVTRT	9	40.7351	2694.82	0.1661	0.6131	0.2699	0.7961
FSLGNLEQF	9	53.7399	65.82	0.83	0.0176	0.613	0.0319	SB					IGPKNYEFL	9	53.772	17.61	0.9423	0.0059	0.7349	0.0093
ISPTSKFQM	9	43.799	1779.05	0.4539	0.1313	0.3083	0.5423	SB					FQFINPTTI	9	52.6174	9.52	0.9692	0.0031	0.7918	0.0073
AGQFNQDYL	9	40.528	29.53	0.9107	0.0091	0.6871	0.0139	SB					VQPFNYVTL	9	48.9768	108.18	0.8708	0.0132	0.5671	0.0459
FSVEGQLEF	9	39.0929	3769.37	0.2095	0.4539	0.2389	1.0985	SB					FQIVNPHLL	9	51.8684	23.33	0.9473	0.0054	0.7089	0.0109
HSLINPEVF	9	44.6903	85.94	0.8431	0.0162	0.5884	0.0384	SB					RQIFNGTFV	9	41.2173	24.44	0.8353	0.017	0.7046	0.0115
RIVENVNVI	9	42.4283	137.15	0.7191	0.0366	0.5452	0.0577	SB					YAPMGMHPM	9	40.987	22.27	0.8762	0.0127	0.7132	0.0103
VALRNLEQI	9	44.1348	5.42	0.9876	0.0013	0.8438	0.0055	SB					FQVDNFEAL	9	42.6756	70.25	0.8428	0.0162	0.607	0.0335
NAVRNLQEL	9	42.9554	22.79	0.9475	0.0054	0.7111	0.0106	SB					EAIKNHEEL	9	44.9799	44.42	0.9181	0.0084	0.6494	0.0223
RIIANVEEI	9	45.0316	18.82	0.9072	0.0095	0.7287	0.0095	SB					RQVVHTETL	9	42.9667	298.24	0.701	0.0406	0.4734	0.115
GLQKAVVNLD	10	41.1288	43928.6	0	76.8182	0.012	80.0617	WB					VSLLNPPETL	10	49.1086	67.1	0.8772	0.0126	0.6112	0.0324
RNISNQLVI	9	40.8238	84.33	0.7756	0.0242	0.5901	0.0379	SB					SALENAENHV	10	52.7679	49.47	0.8186	0.0188	0.6394	0.0257
RLNLNNTVL	9	40.9282	848.59	0.4258	0.1511	0.3767	0.2795	SB					NSQVNFDFI	9	45.3877	12.11	0.8647	0.0139	0.7695	0.0081
MAPENGYLM	9	40.8139	16.54	0.9485	0.0053	0.7407	0.0091	SB					AGLHNISPQM	10	53.907	138.85	0.521	0.0973	0.544	0.0585
RQVENVLSL	9	46.2307	59.57	0.9077	0.0094	0.6223	0.0296	SB					AGLSNIPDLAL	11	45.2692	413.62	0.5659	0.0755	0.4432	0.1577
SRTPGQVLSL	10	44.1081	23713.7	0.0241	3.7913	0.0689	13.9634	WB					AMNVNEIFM	9	49.1128	38.02	0.812	0.0195	0.6637	0.0182
SLIRILQTI	9	44.3968	1141.83	0.3717	0.2006	0.3493	0.3629	SB					NMLINDTTF	9	41.8396	185.77	0.5226	0.0968	0.5171	0.0731
VTIRLLETI	9	44.0389	367.57	0.5331	0.0934	0.4541	0.139	SB					AQMAMLQFI	9	41.7195	128.11	0.5324	0.0937	0.5515	0.0534
YSSFSSPHM	9	45.1872	3908.37	0.1768	0.5695	0.2356	1.1358	WB					GQITNFEYL	9	52.3032	8.86	0.9722	0.0028	0.7983	0.0071
SSLLNIQHF	9	50.0578	35.29	0.9232	0.0079	0.6706	0.0168	SB					LSLENGTHTL	10	47.4363	105.51	0.8181	0.0189	0.5694	0.045
AMFENFVSV	9	43.2157	45.55	0.8059	0.0203	0.647	0.0232	SB					SSPTNGMKTM	10	53.8729	63.34	0.875	0.0128	0.6166	0.031
HAIENIDTF	9	48.5217	15.39	0.9613	0.004	0.7474	0.0089	SB					TQYPSPVFM	9	42.2328	2202.27	0.493	0.1098	0.2886	0.6583
YHNQSQGLL	9	49.3977	15847.2	0.0234	3.8786	0.1062	6.5326	WB					GQLSNGEPHF	10	45.0456	1522.64	0.2174	0.4311	0.3227	0.4722
SAPLPPSIFM	10	42.5419	2247.96	0.4117	0.1633	0.2867	0.6714	SB					SALQNFASTF	10	51.7638	46.46	0.8198	0.0187	0.6452	0.024
TTQRNVEVI	9	50.9064	136.73	0.7704	0.0249	0.5455	0.0576	SB					SQLSLLDYF	9	50.2896	225.23	0.5928	0.0661	0.4993	0.0891
SSIVNSIQVL	10	51.7917	15.72	0.9553	0.0046	0.7454	0.0089	SB					ILHTNLVYL	9	43.0267	55.73	0.825	0.0181	0.6284	0.0282
SSPSNKFFF	9	51.4329	63.84	0.8498	0.0154	0.6159	0.0312	SB					YSPQNSDYL	9	40.8457	5.4	0.9909	0.0009	0.8441	0.0055
IQPDNIVYV	9	43.7436	397.12	0.7166	0.0372	0.4469	0.1499	SB					FGIHNGVETL	10	50.3113	28.9	0.8838	0.0119	0.6891	0.0136
QLVPVNQYV	9	43.7464	26719.8	0.0097	7.276	0.0579	18.2699	WB					KVGVNLFYF	9	63.9896	1268.94	0.2468	0.3662	0.3395	0.3967
FVIRNIVEA	9	42.1901	284.9	0.4521	0.1325	0.4776	0.1108	SB					SQWNNDNPL	9	39.2513	86.41	0.7039	0.0401	0.5879	0.0385
YTLGNIYAM	9	42.9656	33.73	0.8381	0.0167	0.6748	0.0159	SB					YVVDNIDHL	9	44.1972	77.97	0.8587	0.0145	0.5974	0.036
FTWTGAEHI	9	40.9789	1738.82	0.2354	0.3868	0.3104	0.5315	SB					IGIQNFPEGL	10	52.3677	167.26	0.6378	0.0531	0.5268	0.0671
NSMVLFDHV	9	44.3	180.28	0.3978	0.1754	0.5199	0.0707	SB					RMQTNQTPP	9	45.0584	3530.11	0.053	1.9532	0.245	1.0399
SQLQDTQEL	9	47.9066	927.26	0.6543	0.049	0.3685	0.2976	SB					ILVPNGFSKL	10	43.7372	5161.36	0.1048	0.9957	0.2099	1.4869
RMIQNQNAA	9	44.4752	276.9	0.388	0.1849	0.4802	0.1083	SB					FQLRLAEVL	9	49.4638	300.14	0.5611	0.0776	0.4728	0.1156
LGPPPPSFHL	10	47.2674	16679.4	0.0873	1.1928	0.1015	7.121	WB					NMPWNVDTL	9	48.5842	101.14	0.7303	0.034	0.5733	0.0434
VQVEDIVFL	9	52.7238	1860.21	0.4281	0.1493	0.3042	0.5635	SB					NQHYNTSLL	9	52.2374	682.75	0.4808	0.116	0.3968	0.2375
YSHVDLVVM	9	40.5774	96.08	0.7482	0.0299	0.5781	0.0416	SB					YVLTNVAYF	9	44.9902	39.4	0.7752	0.0243	0.6604	0.0189
SQMTNLQEL	9	45.1956	8.33	0.9827	0.0018	0.804	0.0069	SB					AADQNFDYM	9	40.9791	16.54	0.954	0.0047	0.7407	0.0091
MVLVNNVEM	9	40.8506	43.41	0.7931	0.0219	0.6515	0.0214	SB					GAGIALNDNFV	11	45.0549	2980.45	0.0633	1.647	0.2606	0.8758
GKMELQETI	9	49.891	7428.94	0.0979	1.0697	0.1762	2.2599	WB					VSNLNRQFL	9	64.0278	79.96	0.81	0.0198	0.595	0.0366
FGLQNFPEL	9	44.9628	12.29	0.9626	0.0038	0.7681	0.0081	SB					FMKNFLEM	8	45.2534	1395.39	0.1815	0.55	0.3308	0.4356
LAYENVKEV	9	46.1082	446.45	0.5428	0.0903	0.4361	0.1723	SB					TAPYNYSYI	9	54.2914	6.21	0.9634	0.0037	0.8312	0.0059
RTVENVTVF	9	44.7955	223.98	0.7181	0.0368	0.4998	0.0887	SB					SAIYGGTYML	10	47.3834	716.65	0.3946	0.1785	0.3924	0.2458
VVVDMQIVM	9	49.1269	8222.75	0.0921	1.1354	0.1668	2.5426	WB					DAIHNFDFL	9	43.5306	67.71	0.7282	0.0345	0.6104	0.0326
GIVTNWDDM	9	52.7727	663.94	0.2271	0.4029	0.3994	0.2327	SB					YGINNIREL	9	43.8665	20.68	0.9529	0.0048	0.72	0.0098
SSFVDHDFL	9	44.6902	21.13	0.8941	0.0108	0.718	0.0099	SB					RSVDNIQFL	9	64.2276	44.05	0.935	0.0066	0.6501	0.022
AKVDATADYI	10	42.9642	12586	0.0131	5.9192	0.1275	4.56	WB					DQIQNAQYL	9	41.6432	353.02	0.6868	0.0431	0.4578	0.1332
GMKLNLDYL	9	47.0681	66.95	0.754	0.0286	0.6115	0.0323	SB					SAMELIWNL	9	47.7706	411.49	0.5827	0.069	0.4436	0.1567
SQFPNAEKM	9	49.1122	41.75	0.9416	0.006	0.6551	0.02	SB					KSMENLIEL	9	45.876	9.37	0.9843	0.0016	0.7932	0.0073
SSVKNEEQF	9	56.2044	109.08	0.8311	0.0175	0.5663	0.0462	SB					LQLLNTDYL	9	52.958	7.54	0.9559	0.0045	0.8132	0.0066
KMISNPTNF	9	42.9459	240.93	0.6471	0.0504	0.4931	0.0954	SB					VMVTNVTSLL	10	43.6266	112.89	0.5446	0.0893	0.5632	0.0474
AAVNSPSEFM	10	51.7041	1661	0.2437	0.3716	0.3147	0.5098	SB					AQYRLVTEI	9	44.2543	580.55	0.5352	0.0928	0.4118	0.2096
NGFINEDFI	9	52.9759	26.64	0.7411	0.0315	0.6966	0.0126	SB					GMHQSIEEF	9	47.8086	6815.97	0.1053	0.9911	0.1842	2.029
QSAPGTTMFL	10	44.4475	12651.3	0.0526	1.9672	0.127	4.5971	WB					YQQMNPEAL	9	47.0169	84.28	0.8685	0.0135	0.5902	0.0379
QTVENVEHL	9	50.7319	90.49	0.8962	0.0106	0.5836	0.0396	SB					ISPHNNQHF	9	48.8175	1456.73	0.5005	0.1061	0.3268	0.4536
TVISNAVDHI	10	48.2165	180.53	0.5392	0.0915	0.5198	0.0708	SB					VKIEDIETF	9	42.967	12928.6	0.0836	1.2534	0.125	4.7526
AAVQNPALTAL	11	48.3739	58.54	0.8901	0.0112	0.6239	0.0292	SB					YSPQNEDEL	9	53.0011	17.11	0.9696	0.0031	0.7375	0.0092
YSITNTEEL	9	48.8095	3.03	0.9977	0.0002	0.8976	0.0036	SB					YVLHNSNTM	9	55.8462	32.73	0.8937	0.0109	0.6776	0.0153
QAGPVVNTHM	10	41.7646	10782.9	0.0821	1.2779	0.1418	3.6488	WB					AGLLNNPHFI	10	39.1283	165.63	0.5864	0.0679	0.5277	0.0667
YGLDNEVFL	9	49.0022	39.16	0.9122	0.009	0.661	0.0188	SB					FIMTNVDQI	9	45.1899	13.24	0.8861	0.0117	0.7612	0.0084
SAPKYIDYL	9	50.8838	42.7	0.9216	0.008	0.653	0.0208	SB					AGIENYFIGL	10	47.5416	228.8	0.5345	0.093	0.4979	0.0905
AGPENIPEPM	10	49.0311	25.61	0.9203	0.0081	0.7003	0.0121	SB					FSLENNFLL	9	53.3984	15.86	0.9314	0.007	0.7445	0.009
SSLMKVENM	9	49.0425	352.6	0.612	0.0604	0.4579	0.1331	SB					FSPTNPAHLL	10	49.3018	65.42	0.8706	0.0133	0.6136	0.0318
SSLFNDFGAL	10	42.9472	126.15	0.4029	0.171	0.5529	0.0524	SB					RQAENGMYI	9	44.5326	50.88	0.85	0.0154	0.6368	0.0263
YAADNQIYI	9	44.057	12.61	0.9579	0.0043	0.7658	0.0082	SB					TQLLMTEVM	9	50.0294	231.97	0.5934	0.0659	0.4966	0.0918
SQLEKTFAM	9	45.0318	1119.49	0.4796	0.1166	0.3511	0.3566	SB					YAAQNKQEF	9	64.1204	142.21	0.7937	0.0219	0.5418	0.06
HQMQLVDSI	9	64.4256	367.6	0.5485	0.0859	0.4541	0.139	SB					WSPTNLAYF	9	50.2201	50.98	0.7393	0.0319	0.6366	0.0263
ISGVNRYYV	9	51.4153	29.76	0.7176	0.0369	0.6864	0.014	SB					STHYNLHNL	9	41.7748	204.39	0.7677	0.0255	0.5083	0.0808
AGTRNIYYL	9	51.6565	25.27	0.9228	0.0079	0.7015	0.0119	SB					SSLGHADLDAL	11	61.4585	1739.72	0.2203	0.4226	0.3104	0.5318
QQVINIDQL	9	49.1508	67.34	0.8992	0.0103	0.6109	0.0325	SB					FHVQNIDLL	9	46.5854	222.73	0.5141	0.0995	0.5004	0.0882
IISPNFSFM	9	42.9633	935.77	0.3374	0.2407	0.3677	0.2995	SB					NILVNQERL	9	42.967	405.35	0.5667	0.0752	0.445	0.1538
LGLQNLYHL	9	51.2102	42.16	0.889	0.0114	0.6542	0.0203	SB					SSMENDSSNL	10	48.1261	124.92	0.7878	0.0226	0.5538	0.0518
IGIENIHYL	9	51.5501	7.1	0.9909	0.0009	0.8188	0.0064	SB					AAFQNVLTHV	10	47.8821	58.85	0.8056	0.0203	0.6234	0.0293
YSLNAGSLTM	10	52.8124	1753.48	0.1757	0.574	0.3097	0.5355	WB					SMNVNEIFM	9	49.3067	19.59	0.8663	0.0137	0.725	0.0096
ISMFNGQFL	9	42.9478	11.81	0.9377	0.0064	0.7718	0.008	SB					FSEENHEPL	9	44.9319	19.97	0.9105	0.0092	0.7233	0.0097
LSDIHIDIM	9	43.3828	4888.71	0.1477	0.6886	0.2149	1.4059	WB					FGIDNFEFI	9	51.607	6.46	0.9622	0.0039	0.8276	0.006
LAIRNDEEL	9	53.2165	15.79	0.9471	0.0054	0.745	0.0089	SB					SQVELREQI	9	45.1228	860.87	0.5039	0.1043	0.3754	0.2825
TLISLMEHL	9	45.9082	2446.36	0.2365	0.3848	0.2789	0.7279	SB					TGIRNLEWL	9	46.5502	12.32	0.938	0.0063	0.7679	0.0081
SSIQNPKVSL	10	44.8582	49.65	0.938	0.0063	0.6391	0.0258	SB					ATPGRLIDFL	10	41.2866	5074.54	0.1557	0.6559	0.2114	1.4616
SQVEQQELI	9	49.0957	1779.67	0.3533	0.2222	0.3083	0.5425	SB					TALEHQEYI	9	42.9594	30.69	0.9189	0.0083	0.6835	0.0144
SGQPVEKSQL	10	65.0521	13927.3	0.0914	1.1434	0.1181	5.3303	WB					FSAGSLLVYM	10	41.0188	1679.63	0.0997	1.0498	0.3136	0.5151
ESLRNDQVL	9	42.9606	444.85	0.6309	0.055	0.4364	0.1716	SB					SSLVNKEDVL	10	51.4599	21.85	0.9078	0.0094	0.7149	0.01
VQLENQMVL	9	52.9682	61.33	0.9104	0.0092	0.6196	0.0302	SB					YAPDSIYYL	9	49.9168	216.14	0.8288	0.0177	0.5031	0.0856
SNPDDILTLS	10	40.7536	34901.7	0.0019	18.6869	0.0332	36.9457	WB					NTHENLTYL	9	44.4486	53.5	0.9005	0.0102	0.6322	0.0273
YALLFGDYL	9	52.4026	17.66	0.8772	0.0126	0.7346	0.0093	SB					YGPENTLPTL	10	52.2665	38.83	0.9089	0.0093	0.6618	0.0186
RLITNSEEI	9	45.4033	23.21	0.9008	0.0101	0.7094	0.0108	SB					RALELLNYL	9	47.5916	135.4	0.7896	0.0224	0.5464	0.0569
AAVENLPTFL	10	51.637	26.61	0.942	0.0059	0.6967	0.0125	SB					VMLENYSHL	9	44.7255	25.26	0.898	0.0104	0.7015	0.0119
LVIFNQEVI	9	47.6678	72.62	0.6884	0.0428	0.6039	0.0343	SB					ETIMNQEKL	9	41.3298	624.19	0.6004	0.0638	0.4051	0.2221
VFLINQDLI	9	47.7027	330.82	0.3015	0.2803	0.4638	0.1244	SB					SMLSNLTNLN	10	64.1023	1026.41	0.1265	0.8215	0.3592	0.3288
TSIPNFSYM	9	49.0161	6.45	0.9831	0.0017	0.8278	0.006	SB					VAPFLRQEF	9	46.9893	4467.85	0.2423	0.3743	0.2232	1.2877
FMATNPEHL	9	47.9837	24.08	0.9126	0.0089	0.706	0.0113	SB					VSLLNYQSAL	10	52.7771	129.5	0.6125	0.0603	0.5505	0.0541
TSVENHEFL	9	44.2951	6.01	0.99	0.001	0.8343	0.0058	SB					YMIDNIILL	9	44.3772	47.43	0.8527	0.0151	0.6433	0.0247
SAPRPSSQFV	10	44.7749	2084.69	0.2572	0.3473	0.2937	0.6234	SB					FAIDDHDYL	9	48.8965	33.24	0.8757	0.0127	0.6762	0.0156
YQHIGLVVM	9	44.8016	573.39	0.5376	0.092	0.413	0.2075	SB					SGPTNEDLYI	10	51.9565	26.58	0.8156	0.0192	0.6968	0.0125
ATISNDGATIL	11	45.8855	499.06	0.5611	0.0776	0.4258	0.1876	SB					MSPELIQQF	9	45.1089	7517.89	0.2298	0.3968	0.1751	2.2918
VQQFNLDVI	9	53.8894	62.3	0.7531	0.0288	0.6181	0.0306	SB					FSMVGLYYI	9	40.7332	31.3	0.6292	0.0555	0.6817	0.0146
SAPVNFISAGL	11	52.0923	27.27	0.9385	0.0063	0.6945	0.0129	SB					NSMVLFDHM	9	47.6633	75.65	0.6224	0.0575	0.6002	0.0353
IGIANFAEQI	10	44.0985	62.52	0.5453	0.0887	0.6178	0.0307	SB					RTPENHENL	9	42.9521	101.21	0.9088	0.0093	0.5733	0.0435
VQIKNDVFI	9	50.593	17.34	0.925	0.0077	0.7363	0.0093	SB					SMVQNRVFL	9	52.0804	9.69	0.9593	0.0042	0.7901	0.0074
KALQFLEQV	9	41.2267	966.85	0.4082	0.1664	0.3647	0.3097	SB					VSPTHMYFI	9	47.9117	188.61	0.6074	0.0618	0.5157	0.0743
SAPQNGFWAV	10	52.1795	32.54	0.853	0.0151	0.6781	0.0152	SB					FSYLNPQEL	9	50.8521	10.95	0.9759	0.0025	0.7788	0.0078
AVNMNLHYV	9	51.792	161.42	0.6503	0.0497	0.5301	0.0656	SB					KMIENYEAL	9	40.967	14.15	0.9465	0.0055	0.7551	0.0086
FAPVNVTTEV	10	53.6368	24.88	0.8689	0.0134	0.703	0.0117	SB					KIFNNQEFA	9	40.7213	1479.56	0.1563	0.6534	0.3254	0.4602
RSIQNAQFL	9	41.8593	7.24	0.9859	0.0014	0.817	0.0064	SB					SSIQNGKYTL	10	53.1141	15.74	0.9636	0.0037	0.7453	0.0089
YQVLNEVVI	9	64.0672	24.54	0.8781	0.0125	0.7042	0.0115	SB					TSPLNPEAAVL	11	53.1158	170.34	0.8339	0.0171	0.5251	0.0679
FALANEHYL	9	45.1817	4.21	0.9884	0.0012	0.8672	0.0047	SB					YMPQNPHII	9	45.4632	88.22	0.84	0.0165	0.586	0.039
NSLTWKDTL	9	42.9663	2176.19	0.286	0.2972	0.2897	0.6507	SB					HGVLNFNAEL	10	49.8441	430.72	0.3728	0.1995	0.4394	0.1654
PMNVDNLIM	9	49.225	26574.2	0.003	14.8249	0.0584	18.0454	WB					KSISNPPGSNL	11	48.8088	373.45	0.6813	0.0441	0.4526	0.1412
FGLSNYHQL	9	47.5299	11.52	0.9766	0.0024	0.7741	0.0079	SB					VSPRNSLEVL	10	44.128	103.54	0.8181	0.0189	0.5712	0.0443
SQVLNFEEI	9	42.966	6.3	0.9752	0.0025	0.8299	0.006	SB					SAVISLEGKPL	11	50.7384	371.06	0.246	0.3676	0.4532	0.1403
FSGHNLEYL	9	49.9822	12.24	0.9513	0.005	0.7685	0.0081	SB					YQVLNFAMI	9	41.8024	14.98	0.827	0.0179	0.7498	0.0088
AQILNQVMM	9	42.9673	24.67	0.9553	0.0046	0.7037	0.0116	SB					ILHENFQTL	9	41.0192	285.74	0.6951	0.0416	0.4773	0.1111
LINQNSDYL	9	41.7937	117.15	0.6676	0.0466	0.5597	0.0487	SB					SSLPNLAISTI	11	48.3409	35.12	0.8944	0.0108	0.6711	0.0167
QGPFNNQEM	9	42.9509	284.82	0.7323	0.0335	0.4776	0.1108	SB					YQYTNSEVL	9	52.8702	10.26	0.9643	0.0037	0.7848	0.0076
YMSVADEHL	9	45.0128	2978.36	0.1381	0.7441	0.2607	0.8753	WB					YTLHNIDQL	9	45.0434	14.89	0.9634	0.0037	0.7504	0.0088
SQIKLESEM	9	45.2388	922.21	0.5501	0.0845	0.369	0.2965	SB					SQPSFPVEIL	10	45.0222	5324.96	0.2574	0.3471	0.207	1.5363
FTIENVTRT	9	40.7351	2694.82	0.1661	0.6131	0.2699	0.7961	WB					LRHVNIDHL	9	42.9635	1823.52	0.2334	0.3903	0.306	0.554
IGPKNYEFL	9	53.772	17.61	0.9423	0.0059	0.7349	0.0093	SB					SSPTNSAITQL	11	42.9638	65.91	0.9424	0.0059	0.6129	0.032
FQFINPTTI	9	52.6174	9.52	0.9692	0.0031	0.7918	0.0073	SB					FSLQNQLRL	9	48.3357	18.99	0.9557	0.0045	0.7279	0.0095
VQPFNYVTL	9	48.9768	108.18	0.8708	0.0132	0.5671	0.0459	SB					AAYRNLGQNL	10	40.9545	304.57	0.6259	0.0565	0.4714	0.1169
LGDLTKACFI	10	53.7291	12761.5	0.0015	21.0213	0.1262	4.6593	WB					AAIRNYGIEL	10	56.9048	24.95	0.9305	0.0071	0.7027	0.0117
FQIVNPHLL	9	51.8684	23.33	0.9473	0.0054	0.7089	0.0109	SB					KQILNIYDL	9	45.9358	56.87	0.8179	0.0189	0.6265	0.0286
SSSPGGAYVTR	11	48.1529	36829.9	0.0006	30.9231	0.0283	43.6114	WB					SRILNQNYI	9	44.0147	153.93	0.524	0.0963	0.5345	0.0635
RQIFNGTFV	9	41.2173	24.44	0.8353	0.017	0.7046	0.0115	SB					SQNVPSTNYL	10	45.8632	3653.41	0.2367	0.3844	0.2418	1.0706
YAPMGMHPM	9	40.987	22.27	0.8762	0.0127	0.7132	0.0103	SB					VSYRNIEEL	9	42.5969	8.78	0.9822	0.0018	0.7992	0.007
FQVDNFEAL	9	42.6756	70.25	0.8428	0.0162	0.607	0.0335	SB					FSHPNVLPVL	10	40.8849	84.65	0.7421	0.0313	0.5898	0.038
EAIKNHEEL	9	44.9799	44.42	0.9181	0.0084	0.6494	0.0223	SB					YSHFNETLL	9	41.0002	19.46	0.936	0.0065	0.7256	0.0096
RQVVHTETL	9	42.9667	298.24	0.701	0.0406	0.4734	0.115	SB					ESAISNLDYI	10	47.5185	11.4	0.7232	0.0356	0.7751	0.0079
VSLLNPPETL	10	49.1086	67.1	0.8772	0.0126	0.6112	0.0324	SB					RQGYNMLNL	9	42.9659	731.12	0.4195	0.1565	0.3905	0.2493
SALENAENHV	10	52.7679	49.47	0.8186	0.0188	0.6394	0.0257	SB					FQLINVEDF	9	43.2748	132.12	0.6464	0.0506	0.5486	0.0554
NSQVNFDFI	9	45.3877	12.11	0.8647	0.0139	0.7695	0.0081	SB					SAVENILEHL	10	48.1108	17.79	0.9649	0.0036	0.734	0.0093
AAYASQPAAYA	11	49.8487	8344.74	0.0205	4.3035	0.1655	2.5951	WB					TTVFNFPVSI	10	43.9209	1839.71	0.1015	1.0302	0.3052	0.5582
AGLHNISPQM	10	53.907	138.85	0.521	0.0973	0.544	0.0585	SB					FSPTNYHFL	9	48.0579	8.12	0.9822	0.0018	0.8065	0.0068
AGLSNIPDLAL	11	45.2692	413.62	0.5659	0.0755	0.4432	0.1577	SB					YKNVNVQNF	9	41.0811	5155.95	0.1524	0.6692	0.21	1.4854
AMNVNEIFM	9	49.1128	38.02	0.812	0.0195	0.6637	0.0182	SB					FRLQNSTLM	9	48.2077	685.59	0.2927	0.2899	0.3965	0.2382
NMLINDTTF	9	41.8396	185.77	0.5226	0.0968	0.5171	0.0731	SB					VAPANSLVHAF	11	44.2948	397.18	0.6198	0.0582	0.4469	0.1499
AQMAMLQFI	9	41.7195	128.11	0.5324	0.0937	0.5515	0.0534	SB					YQGQNAWFL	9	44.9341	114.14	0.7175	0.0369	0.5622	0.0478
GQITNFEYL	9	52.3032	8.86	0.9722	0.0028	0.7983	0.0071	SB					LSHVNEEWL	9	42.4804	40.26	0.8069	0.0201	0.6585	0.0193
LSLENGTHTL	10	47.4363	105.51	0.8181	0.0189	0.5694	0.045	SB					MPVQNQMTM	9	40.9653	2015.56	0.2507	0.3591	0.2968	0.602
SSPTNGMKTM	10	53.8729	63.34	0.875	0.0128	0.6166	0.031	SB					SQMIQTEYL	9	41.0992	80.33	0.8156	0.0191	0.5946	0.0367
TQYPSPVFM	9	42.2328	2202.27	0.493	0.1098	0.2886	0.6583	SB					AQPSNSLLGEL	11	45.5695	534.49	0.6764	0.045	0.4195	0.1965
GQLSNGEPHF	10	45.0456	1522.64	0.2174	0.4311	0.3227	0.4722	SB					FAFVNEEKF	9	42.5929	51.28	0.8332	0.0172	0.6361	0.0265
SALQNFASTF	10	51.7638	46.46	0.8198	0.0187	0.6452	0.024	SB					FAHTNIESLV	10	40.9581	77.21	0.6396	0.0525	0.5983	0.0358
SQLSLLDYF	9	50.2896	225.23	0.5928	0.0661	0.4993	0.0891	SB					SAIMNPASKVI	11	53.9338	19.86	0.8669	0.0136	0.7238	0.0097
ILHTNLVYL	9	43.0267	55.73	0.825	0.0181	0.6284	0.0282	SB					SALRSLSNATI	11	42.9669	739.49	0.2239	0.412	0.3895	0.2515
YSPQNSDYL	9	40.8457	5.4	0.9909	0.0009	0.8441	0.0055	SB					YQYTSPDFL	9	43.6451	135.94	0.7565	0.028	0.546	0.0572
FGIHNGVETL	10	50.3113	28.9	0.8838	0.0119	0.6891	0.0136	SB					FAYEGRDYI	9	47.7424	22.84	0.8524	0.0151	0.7109	0.0106
KVGVNLFYF	9	63.9896	1268.94	0.2468	0.3662	0.3395	0.3967	SB					YAGSNFPEHI	10	53.7541	47.25	0.7351	0.0329	0.6437	0.0246
AAPDPVLPPLP	11	46.7756	18976.7	0.0236	3.8472	0.0895	8.9732	WB					SSLSNPIANTM	11	52.9919	23.95	0.9485	0.0053	0.7065	0.0112
FIIDPGGVIR	10	63.1577	39076.7	0.0002	44.5	0.0228	53.2243	WB					ASPLNPDMKM	10	45.0344	186.7	0.7722	0.0247	0.5167	0.0735
SQWNNDNPL	9	39.2513	86.41	0.7039	0.0401	0.5879	0.0385	SB					NTPENREYL	9	42.9624	68.51	0.899	0.0103	0.6093	0.0329
YVVDNIDHL	9	44.1972	77.97	0.8587	0.0145	0.5974	0.036	SB					FVHENIETF	9	45.0611	193.16	0.7435	0.0309	0.5135	0.0762
GMVGFSITFL	10	49.079	8044.29	0.0182	4.7072	0.1689	2.4733	WB					KMIINEELM	9	41.1792	17.81	0.8917	0.0111	0.7339	0.0093
IGIQNFPEGL	10	52.3677	167.26	0.6378	0.0531	0.5268	0.0671	SB					RTPQNLFYV	9	42.9465	48.13	0.8414	0.0163	0.642	0.0251
RMQTNQTPP	9	45.0584	3530.11	0.053	1.9532	0.245	1.0399	WB					FQAQLQQEM	9	44.969	2035.83	0.3897	0.1832	0.2959	0.6084
LVMKANNSVI	10	45.0663	3273.61	0.0308	3.1241	0.252	0.9674	WB					SAIFNFQSLL	10	44.7332	25.55	0.8474	0.0157	0.7005	0.012
ILVPNGFSKL	10	43.7372	5161.36	0.1048	0.9957	0.2099	1.4869	WB					SAIINLFHLI	10	49.0556	9.49	0.8647	0.0139	0.792	0.0073
FQLRLAEVL	9	49.4638	300.14	0.5611	0.0776	0.4728	0.1156	SB					SQVINPTAITV	11	60.7115	162.63	0.7108	0.0385	0.5294	0.0659
NMPWNVDTL	9	48.5842	101.14	0.7303	0.034	0.5733	0.0434	SB					ASLTSDPLARL	11	42.9462	9775.94	0.058	1.7861	0.1508	3.1957
GAGSSEPVTGLD	12	69.6923	44216.1	0	78.1818	0.0114	81.8342	WB					SSIANLKVSLL	11	40.921	42.34	0.8366	0.0169	0.6538	0.0205
NQHYNTSLL	9	52.2374	682.75	0.4808	0.116	0.3968	0.2375	SB					FAQYNLDQF	9	49.4381	73.46	0.787	0.0227	0.6029	0.0346
YVLTNVAYF	9	44.9902	39.4	0.7752	0.0243	0.6604	0.0189	SB					AFMKNFLEM	9	40.852	489.5	0.4009	0.1728	0.4276	0.1851
AADQNFDYM	9	40.9791	16.54	0.954	0.0047	0.7407	0.0091	SB					AGPTNSLKYVP	11	41.8849	3729.73	0.0656	1.5903	0.2399	1.089
GAGIALNDNFV	11	45.0549	2980.45	0.0633	1.647	0.2606	0.8758	WB					FASINPLNGTL	11	41.1469	304.29	0.6064	0.0621	0.4715	0.1168
VSNLNRQFL	9	64.0278	79.96	0.81	0.0198	0.595	0.0366	SB					YVHVNQYDI	9	46.8611	88.09	0.6279	0.0559	0.5861	0.039
FMKNFLEM	8	45.2534	1395.39	0.1815	0.55	0.3308	0.4356	WB					SALENGRYEL	10	42.7132	19.36	0.9551	0.0046	0.7261	0.0096
TAPYNYSYI	9	54.2914	6.21	0.9634	0.0037	0.8312	0.0059	SB					FQEMNIELI	9	44.9825	117.54	0.6729	0.0456	0.5594	0.0488
SAIYGGTYML	10	47.3834	716.65	0.3946	0.1785	0.3924	0.2458	SB					VAPYNTTQFL	10	43.6952	71.5	0.8108	0.0197	0.6054	0.0339
DAIHNFDFL	9	43.5306	67.71	0.7282	0.0345	0.6104	0.0326	SB					FMISHLDYL	9	45.8797	18.51	0.836	0.0169	0.7303	0.0095
YGINNIREL	9	43.8665	20.68	0.9529	0.0048	0.72	0.0098	SB					FTVSNFVDNL	10	45.7776	188.4	0.4978	0.1074	0.5158	0.0742
RSVDNIQFL	9	64.2276	44.05	0.935	0.0066	0.6501	0.022	SB					IINENYDYL	9	45.0516	65.82	0.7701	0.025	0.613	0.0319
DQIQNAQYL	9	41.6432	353.02	0.6868	0.0431	0.4578	0.1332	SB					IMGQNVADYM	10	41.5024	102.21	0.4021	0.1717	0.5724	0.0438
SAMELIWNL	9	47.7706	411.49	0.5827	0.069	0.4436	0.1567	SB					RSLDNGGYYI	10	52.8629	94.58	0.6739	0.0454	0.5795	0.041
KSMENLIEL	9	45.876	9.37	0.9843	0.0016	0.7932	0.0073	SB					RQPSIELPSM	10	50.198	5206.46	0.1704	0.5955	0.2091	1.4999
LQLLNTDYL	9	52.958	7.54	0.9559	0.0045	0.8132	0.0066	SB					RSPENVIETI	10	44.762	47.16	0.9228	0.0079	0.6439	0.0245
VMVTNVTSLL	10	43.6266	112.89	0.5446	0.0893	0.5632	0.0474	SB					SQVVNVLTSVI	11	44.9335	46.81	0.7477	0.03	0.6445	0.0242
AQYRLVTEI	9	44.2543	580.55	0.5352	0.0928	0.4118	0.2096	SB					RTISNPEVVM	10	41.0758	192.97	0.7272	0.0347	0.5136	0.0761
GMHQSIEEF	9	47.8086	6815.97	0.1053	0.9911	0.1842	2.029	WB					INQMVNTVLI	10	41.9771	82.86	0.423	0.1536	0.5918	0.0375
YQQMNPEAL	9	47.0169	84.28	0.8685	0.0135	0.5902	0.0379	SB					IGVRNENTFL	10	41.0279	345.02	0.3934	0.1797	0.4599	0.13
ISPHNNQHF	9	48.8175	1456.73	0.5005	0.1061	0.3268	0.4536	SB					YAIENVETNL	10	48.936	8.9	0.9798	0.0021	0.798	0.0071
VKIEDIETF	9	42.967	12928.6	0.0836	1.2534	0.125	4.7526	WB					YTVENAKDII	10	47.6031	187.09	0.5091	0.1017	0.5165	0.0737
YILAGVENSK	10	69.387	39801.3	0.0001	61.0417	0.0211	56.7252	WB					GQLANFQEML	10	44.7192	549.13	0.4722	0.1203	0.417	0.2
AFEKIPEFI	9	62.5121	26927.3	0.0089	7.7175	0.0572	18.5878	WB					FQNFGNVVEL	10	49.2436	273.59	0.5794	0.0699	0.4814	0.1072
YSPQNEDEL	9	53.0011	17.11	0.9696	0.0031	0.7375	0.0092	SB					GTPSGPDFNYI	11	50.6862	9147.1	0.0836	1.2528	0.157	2.9219
YVLHNSNTM	9	55.8462	32.73	0.8937	0.0109	0.6776	0.0153	SB					FVRINQDYI	9	41.6719	42.37	0.716	0.0373	0.6537	0.0205
AGLLNNPHFI	10	39.1283	165.63	0.5864	0.0679	0.5277	0.0667	SB					SGPENFQVGSM	11	42.9508	89.19	0.8474	0.0157	0.585	0.0393
FIMTNVDQI	9	45.1899	13.24	0.8861	0.0117	0.7612	0.0084	SB					SAILSDPESHI	11	50.1916	1830.24	0.2131	0.4436	0.3057	0.5558
AGIENYFIGL	10	47.5416	228.8	0.5345	0.093	0.4979	0.0905	SB					TAPLNTQIPTL	11	46.0947	44.06	0.9499	0.0051	0.6501	0.022
FSLENNFLL	9	53.3984	15.86	0.9314	0.007	0.7445	0.009	SB					AAFRNFSDEI	10	42.965	14.25	0.8836	0.0119	0.7544	0.0086
FSPTNPAHLL	10	49.3018	65.42	0.8706	0.0133	0.6136	0.0318	SB					SSPMNEFETL	10	42.9539	17.38	0.9564	0.0045	0.7361	0.0093
RQAENGMYI	9	44.5326	50.88	0.85	0.0154	0.6368	0.0263	SB					SSIERMGQTM	10	64.186	839.91	0.4432	0.1388	0.3777	0.2774
TQLLMTEVM	9	50.0294	231.97	0.5934	0.0659	0.4966	0.0918	SB					ITLTSANHAMI	11	47.7597	1225.89	0.1216	0.8573	0.3427	0.3857
YAAQNKQEF	9	64.1204	142.21	0.7937	0.0219	0.5418	0.06	SB					SPPTAPNDVYL	11	45.1958	1297.77	0.4782	0.1173	0.3375	0.4052
WSPTNLAYF	9	50.2201	50.98	0.7393	0.0319	0.6366	0.0263	SB					FAHPGMMQEL	10	51.2198	2532.88	0.2366	0.3845	0.2757	0.7524
STHYNLHNL	9	41.7748	204.39	0.7677	0.0255	0.5083	0.0808	SB					AAPQNFTPSMI	11	52.6345	14.59	0.9209	0.0081	0.7522	0.0087
SSLGHADLDAL	11	61.4585	1739.72	0.2203	0.4226	0.3104	0.5318	SB					AGNINQSLMTL	11	57.8915	1287.34	0.3713	0.2012	0.3382	0.4018
FHVQNIDLL	9	46.5854	222.73	0.5141	0.0995	0.5004	0.0882	SB					TGILNPEGYTL	11	47.663	84.5	0.833	0.0172	0.5899	0.038
AMLISAGLPPL	11	58.6258	2159.59	0.0446	2.3045	0.2904	0.6459	WB					SLGKNPTDAYL	11	44.5302	2400.22	0.2498	0.3606	0.2806	0.7144
NILVNQERL	9	42.967	405.35	0.5667	0.0752	0.445	0.1538	SB					SMGVNDIDISL	11	64.0656	1428.37	0.2086	0.4567	0.3286	0.4454
SSMENDSSNL	10	48.1261	124.92	0.7878	0.0226	0.5538	0.0518	SB					FIFSDLEYM	9	44.3761	318.07	0.4095	0.1653	0.4674	0.1208
AAFQNVLTHV	10	47.8821	58.85	0.8056	0.0203	0.6234	0.0293	SB					SMDNNRSLDL	10	53.1132	3395.32	0.1279	0.8119	0.2486	1.0051
SMNVNEIFM	9	49.3067	19.59	0.8663	0.0137	0.725	0.0096	SB					FALSNEHYSL	10	41.139	12.25	0.9209	0.0081	0.7685	0.0081
FSEENHEPL	9	44.9319	19.97	0.9105	0.0092	0.7233	0.0097	SB					AAIEAMNGQYL	11	46.0755	12.95	0.974	0.0027	0.7633	0.0083
FGIDNFEFI	9	51.607	6.46	0.9622	0.0039	0.8276	0.006	SB					SAPRNFVENF	10	52.8114	79.68	0.8176	0.0189	0.5954	0.0365
SQVELREQI	9	45.1228	860.87	0.5039	0.1043	0.3754	0.2825	SB					ASPMSIPTNTM	11	61.3799	1886.07	0.4039	0.1702	0.3029	0.57
TGIRNLEWL	9	46.5502	12.32	0.938	0.0063	0.7679	0.0081	SB					WKVVNPYYL	9	45.6752	335.78	0.3528	0.2228	0.4624	0.1262
NGGEILNETR	10	42.9674	42737.3	0.0001	54.5556	0.0145	72.8916	WB					SLKSNYNLPM	10	44.9846	2271.51	0.1046	0.9968	0.2857	0.678
ATPGRLIDFL	10	41.2866	5074.54	0.1557	0.6559	0.2114	1.4616	WB					RAVANETGAFF	11	62.2903	397.18	0.3796	0.193	0.4469	0.1499
TALEHQEYI	9	42.9594	30.69	0.9189	0.0083	0.6835	0.0144	SB					HALTNAIQDSL	11	53.2425	67.43	0.8344	0.0171	0.6108	0.0325
FSAGSLLVYM	10	41.0188	1679.63	0.0997	1.0498	0.3136	0.5151	WB					YQYALEHMI	9	53.0832	1686.99	0.285	0.2983	0.3132	0.5172
SSEPVTGLDAK	11	69.3686	33329.5	0.0007	30.4423	0.0375	32.2596	WB					LSVINAEEYM	10	42.9638	61.06	0.5041	0.1042	0.62	0.0301
SSLVNKEDVL	10	51.4599	21.85	0.9078	0.0094	0.7149	0.01	SB					RALENPDTASL	11	44.786	36.27	0.9465	0.0055	0.6681	0.0173
YAPDSIYYL	9	49.9168	216.14	0.8288	0.0177	0.5031	0.0856	SB					AGLKNLNVVFI	11	42.9666	159.38	0.4985	0.1071	0.5313	0.065
NTHENLTYL	9	44.4486	53.5	0.9005	0.0102	0.6322	0.0273	SB					SAFSNLSTSQM	11	57.124	22.29	0.9128	0.0089	0.7131	0.0103
YGPENTLPTL	10	52.2665	38.83	0.9089	0.0093	0.6618	0.0186	SB					FAPRDPIPYL	10	47.7052	307.76	0.6498	0.0498	0.4705	0.1178
IAIVNYANLN	10	43.8809	1847.31	0.0268	3.4711	0.3048	0.5602	WB					TGPSNQWASEL	11	49.7373	320.65	0.7153	0.0375	0.4667	0.1216
RALELLNYL	9	47.5916	135.4	0.7896	0.0224	0.5464	0.0569	SB					FSPPTLPGNFL	11	52.6774	4702.81	0.2274	0.402	0.2185	1.3542
YCFDGSCPTL	10	43.3968	13077.9	0.0227	3.9564	0.1239	4.8349	WB					SLLANPVAEYL	11	45.5516	116.18	0.6662	0.0468	0.5605	0.0484
VMLENYSHL	9	44.7255	25.26	0.898	0.0104	0.7015	0.0119	SB					SSINNLQTNTV	11	56.9565	48.41	0.8339	0.0172	0.6414	0.0253
ETIMNQEKL	9	41.3298	624.19	0.6004	0.0638	0.4051	0.2221	SB					GALKNLSVIYI	11	45.2006	69.73	0.6712	0.0459	0.6077	0.0333
SMLSNLTNLN	10	64.1023	1026.41	0.1265	0.8215	0.3592	0.3288	WB					SAIHNFYDNI	10	48.6762	17.66	0.7859	0.0229	0.7346	0.0093
VAGIVEMKML	10	47.5519	21565.8	0.0064	9.5087	0.0777	11.4812	WB					IGISNYPESTI	11	53.082	77.84	0.6046	0.0626	0.5975	0.036
VAPFLRQEF	9	46.9893	4467.85	0.2423	0.3743	0.2232	1.2877	SB					STVQNAEAYVL	11	63.0856	170.82	0.7071	0.0393	0.5249	0.068
YLAINEISGQ	10	61.6508	35039.4	0.0002	46.3077	0.0329	37.3972	WB					YQGPGGLLDYI	11	47.013	2670.07	0.1562	0.6538	0.2708	0.7896
VSLLNYQSAL	10	52.7771	129.5	0.6125	0.0603	0.5505	0.0541	SB					SQPESKVFYL	10	41.0001	1752.99	0.4366	0.1433	0.3097	0.5354
YMIDNIILL	9	44.3772	47.43	0.8527	0.0151	0.6433	0.0247	SB					ASMSNDFKSVL	11	48.8529	87.3	0.7559	0.0281	0.5869	0.0388
FAIDDHDYL	9	48.8965	33.24	0.8757	0.0127	0.6762	0.0156	SB					GQLSNGEPHFL	11	48.1047	193.86	0.6423	0.0518	0.5132	0.0765
SGPTNEDLYI	10	51.9565	26.58	0.8156	0.0192	0.6968	0.0125	SB					AMHRNLVDNI	10	53.9346	339.28	0.2537	0.3536	0.4615	0.1276
MSPELIQQF	9	45.1089	7517.89	0.2298	0.3968	0.1751	2.2918	SB					FALKNPFYSL	10	38.3573	13.61	0.8984	0.0104	0.7587	0.0085
FSMVGLYYI	9	40.7332	31.3	0.6292	0.0555	0.6817	0.0146	SB					SALQNAESDRL	11	44.8999	18.95	0.9566	0.0044	0.7281	0.0095
NSMVLFDHM	9	47.6633	75.65	0.6224	0.0575	0.6002	0.0353	SB					QMLMNHVANF	10	52.9736	2255	0.0637	1.6376	0.2864	0.6733
RTPENHENL	9	42.9521	101.21	0.9088	0.0093	0.5733	0.0435	SB					VSFQNISSNVL	11	45.2714	118.26	0.7639	0.0263	0.5589	0.0491
SMVQNRVFL	9	52.0804	9.69	0.9593	0.0042	0.7901	0.0074	SB					YQYKGMGLSM	10	42.8796	3233.51	0.1436	0.7085	0.2531	0.9543
GPGGSPCSCAKM	12	41.8717	26924.4	0.0004	37.2593	0.0572	18.5834	WB					SAVSNNYIQTL	11	48.0049	20.89	0.9634	0.0037	0.7191	0.0099
VSPTHMYFI	9	47.9117	188.61	0.6074	0.0618	0.5157	0.0743	SB					AVIENLKYFL	10	45.0615	365.73	0.546	0.0881	0.4545	0.1383
FSYLNPQEL	9	50.8521	10.95	0.9759	0.0025	0.7788	0.0078	SB					YQGQNFNKVL	10	41.6454	848.56	0.4086	0.166	0.3767	0.2795
KMIENYEAL	9	40.967	14.15	0.9465	0.0055	0.7551	0.0086	SB					SAFSSAAELESL	12	48.2204	2745.59	0.1207	0.8637	0.2682	0.8104
KIFNNQEFA	9	40.7213	1479.56	0.1563	0.6534	0.3254	0.4602	WB					YALENFVENL	10	56.3201	11.71	0.9599	0.0041	0.7726	0.008
SSIQNGKYTL	10	53.1141	15.74	0.9636	0.0037	0.7453	0.0089	SB					SSIRNFLIYV	10	48.2465	15.17	0.7791	0.0238	0.7487	0.0088
TSPLNPEAAVL	11	53.1158	170.34	0.8339	0.0171	0.5251	0.0679	SB					YAPSIGFPYSL	11	52.9662	508.98	0.4654	0.1237	0.424	0.1902
YMPQNPHII	9	45.4632	88.22	0.84	0.0165	0.586	0.039	SB					SAHQNYAEWL	10	43.4157	36.24	0.8556	0.0148	0.6682	0.0173
FNSSKDVAVM	10	47.8048	13438.9	0.0183	4.6977	0.1214	5.0349	WB					LMVHNWEYL	9	49.2652	19.04	0.7472	0.0301	0.7277	0.0096
HGVLNFNAEL	10	49.8441	430.72	0.3728	0.1995	0.4394	0.1654	SB					VAARNLMTSEI	11	53.0069	292.49	0.3529	0.2227	0.4752	0.1132
KSISNPPGSNL	11	48.8088	373.45	0.6813	0.0441	0.4526	0.1412	SB					RSGQNNSVFTL	11	43.7767	761.92	0.4557	0.13	0.3867	0.2576
VSPRNSLEVL	10	44.128	103.54	0.8181	0.0189	0.5712	0.0443	SB					FAIRNILDYV	10	46.9605	5.59	0.8627	0.0141	0.8409	0.0056
SAVISLEGKPL	11	50.7384	371.06	0.246	0.3676	0.4532	0.1403	SB					SMMSAYERSM	10	44.3457	1578.81	0.0854	1.2228	0.3194	0.4874
YQVLNFAMI	9	41.8024	14.98	0.827	0.0179	0.7498	0.0088	SB					AGIENKFGLYL	11	44.9172	69.57	0.8733	0.013	0.6079	0.0333
ILHENFQTL	9	41.0192	285.74	0.6951	0.0416	0.4773	0.1111	SB					AAPTNRQIEIL	11	42.9663	42.92	0.9404	0.0061	0.6525	0.021
FIIDPAAVIR	10	65.5603	37447.1	0.0002	44	0.0267	46.0582	WB					SQMEHAMETM	10	46.6648	515.09	0.4858	0.1134	0.4229	0.1917
SSLPNLAISTI	11	48.3409	35.12	0.8944	0.0108	0.6711	0.0167	SB					YQPYNKDWI	9	44.0927	79.19	0.7062	0.0395	0.5959	0.0364
YQYTNSEVL	9	52.8702	10.26	0.9643	0.0037	0.7848	0.0076	SB					VAIENPADVSVI	12	44.6708	122	0.5425	0.0904	0.556	0.0503
YTLHNIDQL	9	45.0434	14.89	0.9634	0.0037	0.7504	0.0088	SB					SAIQNLHSFDP	11	40.7903	1583	0.2471	0.3656	0.3191	0.4885
SQPSFPVEIL	10	45.0222	5324.96	0.2574	0.3471	0.207	1.5363	SB					VHPTNSALNYL	11	46.8408	2444.43	0.1869	0.528	0.279	0.7273
LRHVNIDHL	9	42.9635	1823.52	0.2334	0.3903	0.306	0.554	SB					YANTVLSGGTTM	12	40.539	1012.39	0.2495	0.3612	0.3604	0.3244
SSPTNSAITQL	11	42.9638	65.91	0.9424	0.0059	0.6129	0.032	SB					APMNVDNLIMI	11	65.0297	7098.06	0.0647	1.6127	0.1804	2.1378
FSLQNQLRL	9	48.3357	18.99	0.9557	0.0045	0.7279	0.0095	SB					VLLGNPQPMVM	11	48.1409	2611.92	0.183	0.5441	0.2728	0.774
AAYRNLGQNL	10	40.9545	304.57	0.6259	0.0565	0.4714	0.1169	SB					KSPTAPPDLYF	11	44.8581	13573.5	0.078	1.3477	0.1205	5.1174
AAIRNYGIEL	10	56.9048	24.95	0.9305	0.0071	0.7027	0.0117	SB					YHIGTLQEYL	10	45.0419	2185.87	0.121	0.8614	0.2893	0.6536
KQILNIYDL	9	45.9358	56.87	0.8179	0.0189	0.6265	0.0286	SB					SSYSAADRSMM	11	46.6981	5743.74	0.0802	1.3108	0.2	1.6788
SRILNQNYI	9	44.0147	153.93	0.524	0.0963	0.5345	0.0635	SB					SNLSNYHQYI	10	45.833	66.12	0.6643	0.0472	0.6126	0.032
SQNVPSTNYL	10	45.8632	3653.41	0.2367	0.3844	0.2418	1.0706	SB					TNFTNPVYATL	11	56.2824	546.12	0.5357	0.0926	0.4175	0.1993
VSYRNIEEL	9	42.5969	8.78	0.9822	0.0018	0.7992	0.007	SB					FSFRNTQEVI	10	40.8942	16.64	0.8192	0.0188	0.7401	0.0091
FSHPNVLPVL	10	40.8849	84.65	0.7421	0.0313	0.5898	0.038	SB					SAIQNGSSGGNHL	13	45.1585	73.48	0.7726	0.0246	0.6029	0.0346
YSHFNETLL	9	41.0002	19.46	0.936	0.0065	0.7256	0.0096	SB					YQYQNIFGPL	10	51.262	24.61	0.5983	0.0645	0.7039	0.0115
ESAISNLDYI	10	47.5185	11.4	0.7232	0.0356	0.7751	0.0079	SB					STIINEDASFF	11	41.6037	329.62	0.41	0.1648	0.4641	0.1241
RQGYNMLNL	9	42.9659	731.12	0.4195	0.1565	0.3905	0.2493	SB					FSLAPYRDYL	10	46.988	290.27	0.3269	0.2527	0.4759	0.1125
FQLINVEDF	9	43.2748	132.12	0.6464	0.0506	0.5486	0.0554	SB					TAVEDSDKAYM	11	42.9657	1751.07	0.2406	0.3774	0.3098	0.5348
SAVENILEHL	10	48.1108	17.79	0.9649	0.0036	0.734	0.0093	SB					FTSSMRGMDTV	11	53.2817	1184.05	0.1052	0.992	0.3459	0.3746
TTVFNFPVSI	10	43.9209	1839.71	0.1015	1.0302	0.3052	0.5582	WB					FQVKNPPAAYI	11	41.635	87.71	0.5971	0.0648	0.5865	0.0389
FSPTNYHFL	9	48.0579	8.12	0.9822	0.0018	0.8065	0.0068	SB					AVLTPSMEHTM	11	48.0331	6295.26	0.1816	0.5498	0.1915	1.8575
YKNVNVQNF	9	41.0811	5155.95	0.1524	0.6692	0.21	1.4854	WB					AAMADTFLEHM	11	64.2686	482.72	0.4399	0.141	0.4289	0.1833
FRLQNSTLM	9	48.2077	685.59	0.2927	0.2899	0.3965	0.2382	SB					SAPSADAPMFVM	12	61.0966	1959.29	0.1007	1.0383	0.2994	0.5881
VAPANSLVHAF	11	44.2948	397.18	0.6198	0.0582	0.4469	0.1499	SB					SSLSDDRLNHL	11	54.1063	3878.38	0.2249	0.409	0.2363	1.1278
YQGQNAWFL	9	44.9341	114.14	0.7175	0.0369	0.5622	0.0478	SB					AMGVNMETARF	11	61.1245	2538.17	0.0988	1.0599	0.2755	0.7538
LSHVNEEWL	9	42.4804	40.26	0.8069	0.0201	0.6585	0.0193	SB					SSYGMDSRPPM	11	49.367	2551.5	0.112	0.9318	0.275	0.7575
MPVQNQMTM	9	40.9653	2015.56	0.2507	0.3591	0.2968	0.602	SB					SQFSLTNGMYP	11	55.5989	2515.56	0.0791	1.3289	0.2763	0.7475
SQMIQTEYL	9	41.0992	80.33	0.8156	0.0191	0.5946	0.0367	SB					KAVENGEEHTF	11	61.0697	325.49	0.6743	0.0454	0.4653	0.1229
AQPSNSLLGEL	11	45.5695	534.49	0.6764	0.045	0.4195	0.1965	SB					IGITNHDEYSL	11	44.5557	55.6	0.7852	0.023	0.6286	0.0281
FAFVNEEKF	9	42.5929	51.28	0.8332	0.0172	0.6361	0.0265	SB					VQYPNSINLTL	11	53.3948	603.59	0.6522	0.0493	0.4082	0.2163
FAHTNIESLV	10	40.9581	77.21	0.6396	0.0525	0.5983	0.0358	SB					FGLSNEDLEEL	11	41.023	58.59	0.7733	0.0245	0.6238	0.0292
SAIMNPASKVI	11	53.9338	19.86	0.8669	0.0136	0.7238	0.0097	SB					ALLENMEGLFL	11	53.1464	667.44	0.3739	0.1985	0.3989	0.2336
SALRSLSNATI	11	42.9669	739.49	0.2239	0.412	0.3895	0.2515	SB					YALGTSGHVFTL	12	53.123	2668.74	0.0629	1.6573	0.2708	0.7892
YQYTSPDFL	9	43.6451	135.94	0.7565	0.028	0.546	0.0572	SB					FSYKIDFAEM	10	53.873	1424.16	0.1239	0.8404	0.3289	0.4441
FAYEGRDYI	9	47.7424	22.84	0.8524	0.0151	0.7109	0.0106	SB					SAVSNNYIQTLG	12	64.7707	1727.46	0.101	1.0357	0.311	0.5284
YAGSNFPEHI	10	53.7541	47.25	0.7351	0.0329	0.6437	0.0246	SB					SSILNKYDDNV	11	65.3068	98.33	0.6191	0.0584	0.5759	0.0424
SSLSNPIANTM	11	52.9919	23.95	0.9485	0.0053	0.7065	0.0112	SB					AMVQHPQPTPM	11	54.9159	1958.31	0.1683	0.6044	0.2994	0.5878
ASPLNPDMKM	10	45.0344	186.7	0.7722	0.0247	0.5167	0.0735	SB					FVISNYREQL	10	46.2542	244.25	0.5817	0.0693	0.4918	0.0967
NTPENREYL	9	42.9624	68.51	0.899	0.0103	0.6093	0.0329	SB					AAPINPSDINMI	12	43.8356	241.8	0.4913	0.1107	0.4928	0.0958
FVHENIETF	9	45.0611	193.16	0.7435	0.0309	0.5135	0.0762	SB					HSLENSLIDIM	11	42.9444	122.2	0.7436	0.0309	0.5558	0.0504
GVGVSMLNVFL	11	64.3034	22929.3	0.0011	24.7041	0.0721	12.9771	WB					YQPAPPSGYFM	11	65.1432	1361.68	0.414	0.1613	0.333	0.4253
TVHPPVLPYI	10	63.7894	13890.9	0.0402	2.4947	0.1184	5.3086	WB					SQLYHNQSQGL	11	52.5546	12649.9	0.0581	1.7846	0.127	4.5963
KMIINEELM	9	41.1792	17.81	0.8917	0.0111	0.7339	0.0093	SB					RVFQNEVLGTL	11	64.234	987.87	0.4427	0.1391	0.3627	0.3166
RTPQNLFYV	9	42.9465	48.13	0.8414	0.0163	0.642	0.0251	SB					ASAVSNNYIQTL	12	52.9755	909.48	0.1313	0.7883	0.3703	0.2937
FQAQLQQEM	9	44.969	2035.83	0.3897	0.1832	0.2959	0.6084	SB					STIQNADLIVVI	12	45.0232	91.24	0.4954	0.1086	0.5828	0.0398
SAIFNFQSLL	10	44.7332	25.55	0.8474	0.0157	0.7005	0.012	SB					YQFDKVGILTL	11	54.2687	3915.65	0.2146	0.4391	0.2354	1.1377
PLDRALAELAA	11	41.499	43793.3	0	78.1818	0.0123	79.2457	WB					YGYSNRVVDLM	11	46.1805	32.19	0.7915	0.0221	0.6791	0.015
SAIINLFHLI	10	49.0556	9.49	0.8647	0.0139	0.792	0.0073	SB					KQFPTLDLPFL	11	44.6119	4849.57	0.1662	0.6129	0.2156	1.3946
DVQLQESGPGL	11	59.8217	28361.5	0.0016	20.5823	0.0524	21.0539	WB					ASLTNPFGKGAFI	13	44.9825	180.53	0.2172	0.4317	0.5198	0.0708
SQVINPTAITV	11	60.7115	162.63	0.7108	0.0385	0.5294	0.0659	SB					FQYESKVFYL	10	44.7498	1016.76	0.2838	0.2996	0.36	0.3258
LAQQMSHLSL	10	41.8898	12344.6	0.0209	4.2354	0.1293	4.4297	WB					SQISNTEFLQVI	12	43.7945	31.16	0.7127	0.038	0.6822	0.0146
ASLTSDPLARL	11	42.9462	9775.94	0.058	1.7861	0.1508	3.1957	WB					ASPLAASAIL	10	58.3151	9509.49	0.0539	1.9257	0.1534	3.0743
SSIANLKVSLL	11	40.921	42.34	0.8366	0.0169	0.6538	0.0205	SB					SSIVAQTAGI	10	53.0813	3842.42	0.0827	1.2685	0.2372	1.1181
FAQYNLDQF	9	49.4381	73.46	0.787	0.0227	0.6029	0.0346	SB					AALYGKTEV	9	46.2262	2873.05	0.2399	0.3787	0.264	0.8466
FYKGEEIFL	9	39.6192	28241.8	0.0092	7.5351	0.0528	20.8436	WB					AFLVNGPMI	9	52.5401	1537.88	0.2157	0.4359	0.3218	0.4764
AFMKNFLEM	9	40.852	489.5	0.4009	0.1728	0.4276	0.1851	SB					ALYRGGNQL	9	49.166	12338.4	0.0661	1.5807	0.1293	4.4264
AGPTNSLKYVP	11	41.8849	3729.73	0.0656	1.5903	0.2399	1.089	WB					SQSPQGRVM	9	53.0061	15943.4	0.0737	1.4269	0.1056	6.6004
FASINPLNGTL	11	41.1469	304.29	0.6064	0.0621	0.4715	0.1168	SB					MATLNIQSL	9	52.2506	66.53	0.8308	0.0175	0.612	0.0322
YVHVNQYDI	9	46.8611	88.09	0.6279	0.0559	0.5861	0.039	SB					SSVASNISFI	10	47.739	44.99	0.6667	0.0467	0.6482	0.0228
YLAEVAAGDDK	11	45.606	42620	0	76.8182	0.0148	72.1961	WB					INVTNASSLI	10	52.9945	2115.6	0.0928	1.1276	0.2923	0.6328
SALENGRYEL	10	42.7132	19.36	0.9551	0.0046	0.7261	0.0096	SB					MALELVTVM	9	63.1093	152.54	0.6513	0.0495	0.5353	0.0631
GTLENVHGLDP	11	43.033	29268.7	0.0025	16.1577	0.0495	22.768	WB					LQVKLNNVL	9	45.1023	9445.92	0.0724	1.4533	0.154	3.0448
FQEMNIELI	9	44.9825	117.54	0.6729	0.0456	0.5594	0.0488	SB					GRIMNLTVM	9	42.9624	1254.98	0.1784	0.5628	0.3406	0.3932
VAPYNTTQFL	10	43.6952	71.5	0.8108	0.0197	0.6054	0.0339	SB					IVHQSLNIM	9	44.864	10020.3	0.062	1.6804	0.1486	3.3043
FMISHLDYL	9	45.8797	18.51	0.836	0.0169	0.7303	0.0095	SB					LKPENIMLV	9	47.1341	6418.51	0.1409	0.7262	0.1897	1.8986
FTVSNFVDNL	10	45.7776	188.4	0.4978	0.1074	0.5158	0.0742	SB					ITAMANRTIL	10	49.8162	130.75	0.4509	0.1333	0.5496	0.0547
IYNMNDKQI	9	50.7084	11736.8	0.0282	3.3478	0.1339	4.107	WB					SQPRSISESF	10	42.9632	8508.29	0.1457	0.6969	0.1637	2.6641
IINENYDYL	9	45.0516	65.82	0.7701	0.025	0.613	0.0319	SB					SALSNDLLQNC	11	58.9795	1798.31	0.1697	0.5984	0.3073	0.5474
IMGQNVADYM	10	41.5024	102.21	0.4021	0.1717	0.5724	0.0438	SB					YAFQDDRYL	9	52.9559	327.3	0.5932	0.0659	0.4648	0.1234
RSLDNGGYYI	10	52.8629	94.58	0.6739	0.0454	0.5795	0.041	SB					IQFVPADGPTF	11	53.3347	11684.3	0.0741	1.4188	0.1344	4.0784
RQPSIELPSM	10	50.198	5206.46	0.1704	0.5955	0.2091	1.4999	WB					IANNFINLSFL	11	64.1097	82.37	0.5101	0.1012	0.5923	0.0373
RSPENVIETI	10	44.762	47.16	0.9228	0.0079	0.6439	0.0245	SB					AAIKLQELL	9	40.4415	232.65	0.7671	0.0256	0.4963	0.0921
SQVVNVLTSVI	11	44.9335	46.81	0.7477	0.03	0.6445	0.0242	SB					AAINNRLEL	9	50.5317	8.46	0.9846	0.0016	0.8026	0.0069
PMNVDNLIMI	10	49.9658	12104.2	0.0055	10.4112	0.1311	4.304	WB					AAIPADMAAVL	11	43.4437	3708.2	0.1534	0.6652	0.2404	1.0839
GSSEPVTGLDAK	12	69.3404	40247.7	0	71.5385	0.0201	58.9882	WB					AAIRDGELI	9	45.0783	115.42	0.7372	0.0324	0.5611	0.0482
RTISNPEVVM	10	41.0758	192.97	0.7272	0.0347	0.5136	0.0761	SB					AALLNQQFL	9	53.8876	5.41	0.9929	0.0007	0.8439	0.0055
EITALAPSTMK	11	45.0679	42973.8	0.0001	59.8485	0.014	74.2881	WB					AALNNHVEV	9	53.1993	8.53	0.9778	0.0023	0.8019	0.007
INQMVNTVLI	10	41.9771	82.86	0.423	0.1536	0.5918	0.0375	SB					AALQNYNNEL	10	40.5759	38.53	0.9236	0.0078	0.6625	0.0184
IGVRNENTFL	10	41.0279	345.02	0.3934	0.1797	0.4599	0.13	SB					AALVDLDSL	9	49.5273	59.47	0.8509	0.0153	0.6224	0.0295
YAIENVETNL	10	48.936	8.9	0.9798	0.0021	0.798	0.0071	SB					AANRNNDAL	9	44.239	31.54	0.9167	0.0085	0.681	0.0147
YTVENAKDII	10	47.6031	187.09	0.5091	0.1017	0.5165	0.0737	SB					AAPESFEEL	9	60.3086	149.29	0.8896	0.0113	0.5373	0.0622
GQLANFQEML	10	44.7192	549.13	0.4722	0.1203	0.417	0.2	SB					AAPIMLDLV	9	45.8633	130.87	0.6567	0.0485	0.5495	0.0548
FQNFGNVVEL	10	49.2436	273.59	0.5794	0.0699	0.4814	0.1072	SB					AAVENVSEL	9	48.9602	9.51	0.9866	0.0014	0.7918	0.0073
GTPSGPDFNYI	11	50.6862	9147.1	0.0836	1.2528	0.157	2.9219	WB					AAVIDQERL	9	45.1442	981.29	0.5215	0.0971	0.3633	0.3144
GSFSPGTSPAFL	12	41.6474	13552.7	0.0135	5.8051	0.1207	5.1047	WB					AAVVGLVAI	9	40.9527	466.34	0.4855	0.1136	0.4321	0.1788
FVRINQDYI	9	41.6719	42.37	0.716	0.0373	0.6537	0.0205	SB					AAVVMLDRI	9	41.0151	97.72	0.6406	0.0523	0.5765	0.0422
SGPENFQVGSM	11	42.9508	89.19	0.8474	0.0157	0.585	0.0393	SB					AAVVNFEEAL	10	50.1377	21.58	0.8982	0.0104	0.7161	0.01
SAILSDPESHI	11	50.1916	1830.24	0.2131	0.4436	0.3057	0.5558	SB					AGIENKFGL	9	45.0253	249.35	0.7574	0.0278	0.4899	0.0987
TAPLNTQIPTL	11	46.0947	44.06	0.9499	0.0051	0.6501	0.022	SB					AGLENPITV	9	41.2923	61.82	0.9132	0.0089	0.6188	0.0304
AAFRNFSDEI	10	42.965	14.25	0.8836	0.0119	0.7544	0.0086	SB					AGPGFINVHL	10	47.9815	8523.96	0.133	0.7773	0.1635	2.6707
SSPMNEFETL	10	42.9539	17.38	0.9564	0.0045	0.7361	0.0093	SB					AILENANVL	9	48.3388	168.78	0.7747	0.0244	0.526	0.0675
SSIERMGQTM	10	64.186	839.91	0.4432	0.1388	0.3777	0.2774	SB					AIVRNLESL	9	40.7941	90.14	0.8081	0.02	0.584	0.0395
ITLTSANHAMI	11	47.7597	1225.89	0.1216	0.8573	0.3427	0.3857	WB					AMIELVERL	9	41.1297	987.72	0.4641	0.1243	0.3627	0.3165
SPPTAPNDVYL	11	45.1958	1297.77	0.4782	0.1173	0.3375	0.4052	SB					ANYAGQFNQDYL	12	40.8017	342.69	0.3054	0.2761	0.4605	0.129
FAHPGMMQEL	10	51.2198	2532.88	0.2366	0.3845	0.2757	0.7524	SB					AQFYGLTPL	9	48.5068	336.56	0.4949	0.1089	0.4622	0.1265
AAPQNFTPSMI	11	52.6345	14.59	0.9209	0.0081	0.7522	0.0087	SB					AQLELISRL	9	40.7753	3690.91	0.3282	0.2513	0.2409	1.0797
FMNRPAPESL	10	44.8768	11180.3	0.0391	2.5653	0.1384	3.8357	WB					AQLQNQQSF	9	40.7312	378.8	0.7368	0.0325	0.4513	0.1432
AGNINQSLMTL	11	57.8915	1287.34	0.3713	0.2012	0.3382	0.4018	SB					AQLSLIASL	9	40.7606	1055.79	0.4925	0.1101	0.3565	0.3378
TGILNPEGYTL	11	47.663	84.5	0.833	0.0172	0.5899	0.038	SB					AQLVNLREL	9	40.6663	34.08	0.9163	0.0086	0.6739	0.0161
GGLSKDDIENM	11	53.0483	18981.4	0.0167	5.0145	0.0895	8.9775	WB					AQPINFSVSL	10	44.4342	359.98	0.6993	0.0409	0.456	0.136
SLGKNPTDAYL	11	44.5302	2400.22	0.2498	0.3606	0.2806	0.7144	SB					AQVFNLTLL	9	45.3007	42.44	0.8749	0.0128	0.6536	0.0206
SMGVNDIDISL	11	64.0656	1428.37	0.2086	0.4567	0.3286	0.4454	SB					ASFSNGPVL	9	42.9648	18.8	0.9639	0.0037	0.7289	0.0095
AYLPQQLPHL	10	42.9529	16655.4	0.0315	3.0599	0.1016	7.1025	WB					ASIDILHSI	9	64.197	1849.95	0.4687	0.1221	0.3047	0.5609
VSTGDVNVEMN	11	53.2155	27836.8	0.0005	33.65	0.0541	20.1454	WB					ASLLDYDTV	9	56.1337	105.58	0.6575	0.0484	0.5694	0.045
FIFSDLEYM	9	44.3761	318.07	0.4095	0.1653	0.4674	0.1208	SB					ASLQNFNISNL	11	38.8387	137.34	0.7546	0.0284	0.5451	0.0578
SMDNNRSLDL	10	53.1132	3395.32	0.1279	0.8119	0.2486	1.0051	WB					ASLVNHVLL	9	42.9666	8.51	0.9812	0.0019	0.8021	0.0069
FALSNEHYSL	10	41.139	12.25	0.9209	0.0081	0.7685	0.0081	SB					ASMINVEYL	9	50.086	2.47	0.9978	0.0002	0.9166	0.0029
AAIEAMNGQYL	11	46.0755	12.95	0.974	0.0027	0.7633	0.0083	SB					ASMQNVVFDYL	11	44.5902	6.78	0.9735	0.0027	0.8231	0.0062
IGGGVGFGGLEAM	13	53.8744	23126.6	0.0019	18.7677	0.0713	13.2255	WB					ASPRGFPLGL	10	42.9612	8848.74	0.0999	1.048	0.1601	2.8038
SAPRNFVENF	10	52.8114	79.68	0.8176	0.0189	0.5954	0.0365	SB					ASVDNLLHL	9	40.879	54.04	0.9306	0.0071	0.6313	0.0276
MDPVTFIQTL	10	65.0334	17196.1	0.0148	5.4589	0.0986	7.512	WB					ASVLLQDHI	9	42.1426	193.75	0.6565	0.0486	0.5132	0.0764
ASPMSIPTNTM	11	61.3799	1886.07	0.4039	0.1702	0.3029	0.57	SB					ASYVNLPTIAL	11	42.9548	97.39	0.7307	0.0339	0.5768	0.0421
WKVVNPYYL	9	45.6752	335.78	0.3528	0.2228	0.4624	0.1262	SB					ATILNLERV	9	44.5749	53.75	0.8268	0.0179	0.6318	0.0274
FIGLGNMGNPM	11	49.1928	3677.16	0.0138	5.7353	0.2412	1.0763	WB					ATKINITEM	9	42.9488	383.77	0.7011	0.0406	0.4501	0.1451
SLKSNYNLPM	10	44.9846	2271.51	0.1046	0.9968	0.2857	0.678	WB					ATVPNTIVV	9	44.3366	361.67	0.7001	0.0407	0.4556	0.1367
RAVANETGAFF	11	62.2903	397.18	0.3796	0.193	0.4469	0.1499	SB					AVVLNATWL	9	44.8839	145.92	0.6535	0.0491	0.5394	0.0612
HALTNAIQDSL	11	53.2425	67.43	0.8344	0.0171	0.6108	0.0325	SB					DALENLRVYL	10	41.4269	981.47	0.3905	0.1825	0.3633	0.3145
YQYALEHMI	9	53.0832	1686.99	0.285	0.2983	0.3132	0.5172	SB					DALSNVDLL	9	41.0105	132.67	0.7175	0.0369	0.5482	0.0556
LSVINAEEYM	10	42.9638	61.06	0.5041	0.1042	0.62	0.0301	SB					ESFSDYPPL	9	44.0663	4598.16	0.1587	0.6434	0.2206	1.3246
SGGTTMYPGIAD	12	56.1065	35515.8	0	86.6667	0.0316	38.923	WB					FAHIDGDHL	9	45.0291	114.33	0.7543	0.0285	0.562	0.0478
RALENPDTASL	11	44.786	36.27	0.9465	0.0055	0.6681	0.0173	SB					FAIINSNPIEL	11	41.5328	8.83	0.9513	0.005	0.7987	0.0071
TFIIDPGGVIR	11	67.271	39915.1	0.0002	48.25	0.0208	57.3047	WB					FALANHLIKV	10	40.7515	83.43	0.475	0.1189	0.5911	0.0377
AGLKNLNVVFI	11	42.9666	159.38	0.4985	0.1071	0.5313	0.065	SB					FAPVNVTTEVK	11	64.2248	845.75	0.1756	0.5743	0.377	0.2789
SAFSNLSTSQM	11	57.124	22.29	0.9128	0.0089	0.7131	0.0103	SB					FAPVNVTTEVKSV	13	56.8462	119.57	0.3867	0.1861	0.5579	0.0495
FAPRDPIPYL	10	47.7052	307.76	0.6498	0.0498	0.4705	0.1178	SB					FAVVNHQGTL	10	41.1979	18.15	0.8964	0.0106	0.7321	0.0094
TGPSNQWASEL	11	49.7373	320.65	0.7153	0.0375	0.4667	0.1216	SB					FGGSNVHVI	9	40.5842	67.32	0.8158	0.0191	0.6109	0.0325
FSPPTLPGNFL	11	52.6774	4702.81	0.2274	0.402	0.2185	1.3542	SB					FIHEVNPSSL	10	42.4429	2913.97	0.182	0.5479	0.2627	0.8578
SLLANPVAEYL	11	45.5516	116.18	0.6662	0.0468	0.5605	0.0484	SB					FLVQNIHTL	9	42.5547	73.19	0.8592	0.0144	0.6032	0.0345
SSINNLQTNTV	11	56.9565	48.41	0.8339	0.0172	0.6414	0.0253	SB					FMLALKENI	9	42.967	549.6	0.2555	0.3505	0.4169	0.2002
GALKNLSVIYI	11	45.2006	69.73	0.6712	0.0459	0.6077	0.0333	SB					FQAHGLPEV	9	40.9964	7751.98	0.0989	1.0581	0.1723	2.374
SPSTVYLDYM	10	53.0994	2870.85	0.0317	3.0437	0.2641	0.846	WB					FQGTSLTHL	9	43.4251	1553.66	0.3907	0.1823	0.3208	0.4807
YTNGSFGSNFV	11	62.6332	20034.8	0.0039	12.7338	0.0845	9.9538	WB					FQLQQIEFL	9	40.2315	520.63	0.5733	0.0725	0.4219	0.1931
GYPPTGYPPFP	11	52.478	34993.6	0.0008	27.9155	0.033	37.2456	WB					FQSISTEFL	9	40.9094	1089.8	0.3692	0.2036	0.3536	0.348
LSSTVAASNTEL	12	63.4912	28105	0.0011	24.2347	0.0532	20.6088	WB					FQVILLEHI	9	45.1844	346.17	0.5027	0.105	0.4596	0.1305
SAIHNFYDNI	10	48.6762	17.66	0.7859	0.0229	0.7346	0.0093	SB					FQVQDKEVL	9	44.6639	1357.99	0.4666	0.1231	0.3333	0.4242
IGISNYPESTI	11	53.082	77.84	0.6046	0.0626	0.5975	0.036	SB					FSHYMEENL	9	48.6732	1418.33	0.2738	0.3174	0.3293	0.4424
STVQNAEAYVL	11	63.0856	170.82	0.7071	0.0393	0.5249	0.068	SB					FSNKNLEEL	9	41.0808	11.35	0.9752	0.0025	0.7755	0.0079
TSFANIQENAT	11	47.3458	7267.08	0.0229	3.9334	0.1783	2.2009	WB					FSVLNWDQV	9	42.9553	6.2	0.9316	0.007	0.8313	0.0059
YQGPGGLLDYI	11	47.013	2670.07	0.1562	0.6538	0.2708	0.7896	WB					FVQTNISHL	9	40.6084	194.39	0.7437	0.0309	0.5129	0.0767
AYPTYGQQPTA	11	49.977	29082.2	0.0045	11.7646	0.0501	22.4172	WB					FVVPNQKEL	9	40.959	710.52	0.6174	0.0589	0.3931	0.2444
SQPESKVFYL	10	41.0001	1752.99	0.4366	0.1433	0.3097	0.5354	SB					FVYENPVSL	9	40.8088	115.8	0.8476	0.0157	0.5608	0.0483
ASMSNDFKSVL	11	48.8529	87.3	0.7559	0.0281	0.5869	0.0388	SB					GAIRNGGLYV	10	45.0582	116.11	0.5421	0.0906	0.5606	0.0484
GQLSNGEPHFL	11	48.1047	193.86	0.6423	0.0518	0.5132	0.0765	SB					GALRLTTEF	9	49.2962	2899.56	0.251	0.3586	0.2632	0.8539
AMHRNLVDNI	10	53.9346	339.28	0.2537	0.3536	0.4615	0.1276	SB					GAPINVMFL	9	46.7111	19.78	0.9598	0.0041	0.7242	0.0097
FALKNPFYSL	10	38.3573	13.61	0.8984	0.0104	0.7587	0.0085	SB					GAVTLQEYL	9	49.2048	191.35	0.707	0.0394	0.5144	0.0755
SALQNAESDRL	11	44.8999	18.95	0.9566	0.0044	0.7281	0.0095	SB					GAVVNVADL	9	44.9189	41.08	0.8214	0.0185	0.6566	0.0197
QMLMNHVANF	10	52.9736	2255	0.0637	1.6376	0.2864	0.6733	WB					GGPANFGYPDPDYL	14	42.9674	716.45	0.1475	0.6895	0.3924	0.2458
VSFQNISSNVL	11	45.2714	118.26	0.7639	0.0263	0.5589	0.0491	SB					GNLSNFLIHL	10	47.9813	2055.73	0.2174	0.4309	0.295	0.6146
YQYKGMGLSM	10	42.8796	3233.51	0.1436	0.7085	0.2531	0.9543	WB					GNNPNQVYI	9	46.1501	645.13	0.5682	0.0746	0.4021	0.2278
SAVSNNYIQTL	11	48.0049	20.89	0.9634	0.0037	0.7191	0.0099	SB					GNVTNITTV	9	41.7553	236.06	0.6174	0.0589	0.495	0.0935
AVIENLKYFL	10	45.0615	365.73	0.546	0.0881	0.4545	0.1383	SB					GQAQNKVYL	9	41.3435	167.74	0.8302	0.0176	0.5266	0.0672
YQGQNFNKVL	10	41.6454	848.56	0.4086	0.166	0.3767	0.2795	SB					GQVVIIHML	9	63.9591	6993.77	0.1823	0.5468	0.1818	2.0981
SAFSSAAELESL	12	48.2204	2745.59	0.1207	0.8637	0.2682	0.8104	WB					GSIINISSI	9	48.9462	11.82	0.9505	0.0051	0.7718	0.008
YALENFVENL	10	56.3201	11.71	0.9599	0.0041	0.7726	0.008	SB					GSLINPNVI	9	45.3554	31.51	0.9134	0.0089	0.6811	0.0147
SSIRNFLIYV	10	48.2465	15.17	0.7791	0.0238	0.7487	0.0088	SB					GSLSSLLHL	9	39.759	2470.38	0.3159	0.2647	0.278	0.7347
SKFDVSGYPTI	11	51.3406	15997.5	0.0185	4.6551	0.1053	6.6383	WB					GVLSLIDTL	9	40.5413	2333.69	0.2869	0.2963	0.2832	0.6951
FGLGAEQRPPAA	12	61.8277	29516.2	0.0006	30.9808	0.0487	23.2445	WB					HAISNYYDNHL	11	40.7375	59.89	0.8409	0.0164	0.6218	0.0297
YAPSIGFPYSL	11	52.9662	508.98	0.4654	0.1237	0.424	0.1902	SB					HALDNGLFTL	10	40.8768	180.68	0.7874	0.0227	0.5197	0.0709
RTLMNLGGLAVA	12	50.3193	6930.8	0.0018	19.2554	0.1826	2.0738	WB					HSILNAAIMI	10	40.8105	275.34	0.2933	0.2893	0.4808	0.1077
NFGIGQDIQPK	11	64.1746	39044.2	0.0001	67.3529	0.0229	53.0744	WB					IANINQELI	9	49.9223	18.19	0.9236	0.0078	0.7319	0.0094
QSGSEPLDKEK	11	56.1089	45713.4	0	71.1538	0.0083	90.6705	WB					IGLGNLTLI	9	44.6794	52.23	0.7898	0.0224	0.6344	0.0268
SAHQNYAEWL	10	43.4157	36.24	0.8556	0.0148	0.6682	0.0173	SB					IGMTKADLI	9	40.6208	1222.27	0.1768	0.5694	0.343	0.3847
YHSGYDMPYA	10	40.6517	21887.6	0.001	25.5667	0.0764	11.8237	WB					IGVSNFNPL	9	53.1055	12.36	0.8888	0.0114	0.7676	0.0082
LMVHNWEYL	9	49.2652	19.04	0.7472	0.0301	0.7277	0.0096	SB					ILLKLTETI	9	47.5378	2801.95	0.1702	0.5964	0.2663	0.8266
VAARNLMTSEI	11	53.0069	292.49	0.3529	0.2227	0.4752	0.1132	SB					IMVRNIDLV	9	41.7095	22.33	0.7539	0.0286	0.7129	0.0103
RSGQNNSVFTL	11	43.7767	761.92	0.4557	0.13	0.3867	0.2576	SB					IQHSNIVTL	9	40.9932	27.38	0.9519	0.0049	0.6941	0.0129
FAIRNILDYV	10	46.9605	5.59	0.8627	0.0141	0.8409	0.0056	SB					IQVKNEVSL	9	44.9755	172.57	0.8223	0.0184	0.5239	0.0685
SMMSAYERSM	10	44.3457	1578.81	0.0854	1.2228	0.3194	0.4874	WB					KALGNEIVV	9	41.0208	171.57	0.745	0.0306	0.5245	0.0682
DIQMTQTTSSL	11	51.323	21954.5	0.0026	15.9708	0.0761	11.8942	WB					KAPDNRETL	9	42.9466	29.58	0.9729	0.0028	0.687	0.0139
AGIENKFGLYL	11	44.9172	69.57	0.8733	0.013	0.6079	0.0333	SB					KAPVNTAEL	9	46.7613	8.99	0.9893	0.0011	0.797	0.0071
AAPTNRQIEIL	11	42.9663	42.92	0.9404	0.0061	0.6525	0.021	SB					KGITNHLVAI	10	42.9618	82.47	0.6055	0.0623	0.5922	0.0374
SQMEHAMETM	10	46.6648	515.09	0.4858	0.1134	0.4229	0.1917	SB					KGQLNADEI	9	40.7334	127.03	0.6786	0.0446	0.5523	0.0529
YQPYNKDWI	9	44.0927	79.19	0.7062	0.0395	0.5959	0.0364	SB					KQPENVTLL	9	40.708	185.34	0.8669	0.0136	0.5173	0.0729
VAIENPADVSVI	12	44.6708	122	0.5425	0.0904	0.556	0.0503	SB					KSLTNLSFL	9	48.9961	7.88	0.9721	0.0029	0.8092	0.0067
FVHPGAATVPTM	12	55.5975	14302	0.0135	5.7982	0.1157	5.5544	WB					KSYELPDGQVI	11	41.6243	6620.38	0.1113	0.9383	0.1869	1.9624
SAIQNLHSFDP	11	40.7903	1583	0.2471	0.3656	0.3191	0.4885	SB					KSYVNPTEL	9	43.1241	15.65	0.9763	0.0024	0.7458	0.0089
VHPTNSALNYL	11	46.8408	2444.43	0.1869	0.528	0.279	0.7273	WB					KTGYNVDLL	9	42.9669	366.6	0.5595	0.0782	0.4543	0.1386
YANTVLSGGTTM	12	40.539	1012.39	0.2495	0.3612	0.3604	0.3244	SB					KTHINIVVI	9	44.8259	62.63	0.8311	0.0175	0.6176	0.0307
APMNVDNLIMI	11	65.0297	7098.06	0.0647	1.6127	0.1804	2.1378	WB					KTINLQSLI	9	42.5933	4570.48	0.1345	0.7678	0.2211	1.3166
VLLGNPQPMVM	11	48.1409	2611.92	0.183	0.5441	0.2728	0.774	WB					KTLLNPEYL	9	44.9919	13.51	0.9728	0.0028	0.7594	0.0084
KQEGTPEGLYL	11	45.9062	21682.1	0.0276	3.4026	0.0772	11.6056	WB					KTVTNAVVTV	10	45.8674	993.88	0.299	0.283	0.3621	0.3185
KSPTAPPDLYF	11	44.8581	13573.5	0.078	1.3477	0.1205	5.1174	WB					KTVVNKDVF	9	45.0883	188.92	0.6731	0.0456	0.5156	0.0744
YTYAQGTYGAAA	12	44.5973	22183.3	0.0012	23.4911	0.0751	12.1455	WB					LALENYITAL	10	49.7133	75.21	0.757	0.0279	0.6007	0.0351
YHIGTLQEYL	10	45.0419	2185.87	0.121	0.8614	0.2893	0.6536	WB					LALQNAYQAI	10	40.8073	112.54	0.4511	0.1332	0.5635	0.0473
SSYSAADRSMM	11	46.6981	5743.74	0.0802	1.3108	0.2	1.6788	WB					LAPVNIFKA	9	40.7003	273.51	0.4854	0.1136	0.4814	0.1071
SNLSNYHQYI	10	45.833	66.12	0.6643	0.0472	0.6126	0.032	SB					LILQNTTVI	9	52.0698	99.38	0.6813	0.0441	0.5749	0.0428
TNFTNPVYATL	11	56.2824	546.12	0.5357	0.0926	0.4175	0.1993	SB					LMLQGVDLL	9	41.3671	1210.08	0.2409	0.3767	0.3439	0.3815
FSFRNTQEVI	10	40.8942	16.64	0.8192	0.0188	0.7401	0.0091	SB					LQLTNIEHF	9	37.3412	145.33	0.7462	0.0303	0.5398	0.061
SAIQNGSSGGNHL	13	45.1585	73.48	0.7726	0.0246	0.6029	0.0346	SB					LQYPNPLPTL	10	43.5448	929.03	0.4994	0.1066	0.3684	0.298
FSGSSRSDCLAL	12	44.8953	19801.4	0.0029	15.0758	0.0856	9.7468	WB					LSGLNDLLNVL	11	47.737	4659.01	0.0628	1.6615	0.2193	1.3419
YQYQNIFGPL	10	51.262	24.61	0.5983	0.0645	0.7039	0.0115	SB					LSPQGRLSDVL	11	41.0314	6338.46	0.1313	0.7885	0.1909	1.872
ADLINNLGTIAK	12	57.185	24458.5	0.0002	45.6667	0.0661	14.9641	WB					MAPENKVADWL	11	42.9651	71.47	0.8131	0.0194	0.6054	0.0339
STIINEDASFF	11	41.6037	329.62	0.41	0.1648	0.4641	0.1241	SB					NAIINTLAV	9	46.2169	26.48	0.8262	0.018	0.6972	0.0125
FSLAPYRDYL	10	46.988	290.27	0.3269	0.2527	0.4759	0.1125	SB					NALLNSLEF	9	46.4763	153.36	0.6801	0.0443	0.5349	0.0633
PSNIFGNRNLL	11	41.5091	9318.21	0.0236	3.855	0.1553	2.9878	WB					NAPQNPESKL	10	44.8546	435.55	0.7408	0.0316	0.4384	0.1676
TAVEDSDKAYM	11	42.9657	1751.07	0.2406	0.3774	0.3098	0.5348	SB					NGVINGAEL	9	44.5258	99.65	0.75	0.0295	0.5747	0.0429
GLGAQIDGAECVL	13	61.0926	34998.5	0.0002	50.3333	0.033	37.2619	WB					NGVSNGLHL	9	40.912	220.44	0.7322	0.0336	0.5013	0.0873
TGTNACYMEEL	11	40.5893	24071	0.0014	22.2734	0.0676	14.4453	WB					NQLSNHISSL	10	40.8049	662.59	0.496	0.1083	0.3996	0.2324
FTSSMRGMDTV	11	53.2817	1184.05	0.1052	0.992	0.3459	0.3746	WB					NQMVGIEYI	9	40.7064	101.92	0.6625	0.0475	0.5726	0.0437
FQVKNPPAAYI	11	41.635	87.71	0.5971	0.0648	0.5865	0.0389	SB					NSIKNGILYL	10	52.1563	68.68	0.8251	0.0181	0.6091	0.033
AVLTPSMEHTM	11	48.0331	6295.26	0.1816	0.5498	0.1915	1.8575	WB					NSLLNSLPL	9	49.5852	8.67	0.931	0.0071	0.8004	0.007
AAMADTFLEHM	11	64.2686	482.72	0.4399	0.141	0.4289	0.1833	SB					NSLNNLIEL	9	42.4655	24.83	0.952	0.0049	0.7031	0.0117
FLMMNKDELN	10	64.7775	2452.25	0.0356	2.7841	0.2787	0.7295	WB					NSLSNSESL	9	53.833	13.27	0.979	0.0021	0.761	0.0084
SAPSADAPMFVM	12	61.0966	1959.29	0.1007	1.0383	0.2994	0.5881	WB					QAIKNGQAL	9	41.1248	38.76	0.9458	0.0055	0.662	0.0186
FSFGNTSTLGQP	12	64.9442	9462.49	0.0084	7.9702	0.1539	3.0525	WB					QLLNTDYL	8	40.8273	863.48	0.251	0.3585	0.3751	0.2831
AAFGLSEAGFNTA	13	64.4377	18908.6	0.0024	16.6989	0.0899	8.9115	WB					QSIYPLHDVF	10	40.8112	9753.75	0.0545	1.904	0.1511	3.1858
SSLSDDRLNHL	11	54.1063	3878.38	0.2249	0.409	0.2363	1.1278	SB					QSLTNILHL	9	44.9967	21.8	0.9671	0.0034	0.7152	0.01
SLTNSSQSSSLF	12	64.1894	30706.1	0.0012	23.9196	0.0451	25.6937	WB					QSLVNLRELYL	11	45.0439	120.2	0.6061	0.0622	0.5574	0.0496
EEVMMKQQGF	10	64.7771	40086.5	0.0009	27	0.0204	58.1738	WB					RAADPLVGVFL	11	48.253	8188.13	0.1263	0.8233	0.1672	2.5276
AMGVNMETARF	11	61.1245	2538.17	0.0988	1.0599	0.2755	0.7538	WB					RALLLSTYI	9	47.9058	49.49	0.7431	0.031	0.6394	0.0257
SSYGMDSRPPM	11	49.367	2551.5	0.112	0.9318	0.275	0.7575	WB					RALLNAESL	9	53.8926	6.63	0.9869	0.0013	0.8251	0.0061
SQFSLTNGMYP	11	55.5989	2515.56	0.0791	1.3289	0.2763	0.7475	WB					RAPTGYDVV	9	43.0445	184.81	0.6512	0.0495	0.5176	0.0727
KAVENGEEHTF	11	61.0697	325.49	0.6743	0.0454	0.4653	0.1229	SB					RATENDIYNFF	11	40.9518	1536.45	0.2881	0.2949	0.3219	0.476
FTFNDEIKTM	10	55.7942	10845.6	0.0403	2.4898	0.1412	3.6787	WB					RIIENVDVI	9	45.3835	15.68	0.9226	0.0079	0.7456	0.0089
AMIDPDGTLEAL	12	49.2458	11821.2	0.0211	4.1991	0.1333	4.1529	WB					RLITNSEEIAF	11	40.8055	1765.07	0.2263	0.4051	0.309	0.5386
IGITNHDEYSL	11	44.5557	55.6	0.7852	0.023	0.6286	0.0281	SB					RQVQNTAITL	10	48.1106	231.99	0.6829	0.0438	0.4966	0.0919
VQYPNSINLTL	11	53.3948	603.59	0.6522	0.0493	0.4082	0.2163	SB					RSIKNVTEL	9	46.0791	6.65	0.9931	0.0007	0.8249	0.0061
NQASIASFLTVL	12	68.8013	17012.5	0.0033	14.0239	0.0996	7.3739	WB					RSITNDSAVL	10	43.3255	67.35	0.7688	0.0252	0.6109	0.0325
FANKQDLPNAM	11	58.6284	8719.38	0.0513	2.0121	0.1614	2.7514	WB					RSLSNATII	9	51.007	14.09	0.9337	0.0068	0.7555	0.0086
FGLSNEDLEEL	11	41.023	58.59	0.7733	0.0245	0.6238	0.0292	SB					RSVDNIQFLPFL	12	46.3	1187.88	0.3174	0.2631	0.3457	0.3756
PALPPGYSYTSL	12	48.7108	27470.9	0.002	18.4495	0.0554	19.4933	WB					RSVLNNQLL	9	43.4868	62.94	0.8578	0.0146	0.6172	0.0308
ALLENMEGLFL	11	53.1464	667.44	0.3739	0.1985	0.3989	0.2336	SB					RTNVNFQYI	9	44.054	24.38	0.873	0.013	0.7048	0.0114
YALGTSGHVFTL	12	53.123	2668.74	0.0629	1.6573	0.2708	0.7892	WB					RVGGNIEVL	9	40.8019	1121.76	0.5062	0.1032	0.3509	0.3573
PVITGAPYEYR	11	69.4674	44255.3	0	74.2308	0.0113	82.0752	WB					RVLQNLLTI	9	40.5298	28.73	0.8888	0.0114	0.6897	0.0135
FSYKIDFAEM	10	53.873	1424.16	0.1239	0.8404	0.3289	0.4441	WB					RVVDNPIYL	9	41.9484	363.68	0.77	0.025	0.455	0.1375
SAVSNNYIQTLG	12	64.7707	1727.46	0.101	1.0357	0.311	0.5284	WB					SAAFNQLPHL	10	43.8934	117.49	0.6367	0.0534	0.5595	0.0488
EATFGVDESNAK	12	57.5161	44048.9	0	82.5	0.0117	80.8054	WB					SAETNLEAL	9	43.7304	36.3	0.9166	0.0085	0.668	0.0173
SSILNKYDDNV	11	65.3068	98.33	0.6191	0.0584	0.5759	0.0424	SB					SAIFNNVMTL	10	43.4717	12.52	0.9525	0.0049	0.7664	0.0082
AMVQHPQPTPM	11	54.9159	1958.31	0.1683	0.6044	0.2994	0.5878	WB					SAINSIVYI	9	40.635	21.79	0.9145	0.0087	0.7152	0.01
FVISNYREQL	10	46.2542	244.25	0.5817	0.0693	0.4918	0.0967	SB					SAIVLKQEI	9	42.9475	144.27	0.7635	0.0264	0.5405	0.0607
EDSKPQGCMYL	11	44.7225	32374.5	0.0023	16.9857	0.0402	29.6391	WB					SALLLKDVL	9	48.8733	84.31	0.8221	0.0184	0.5902	0.0379
AAPINPSDINMI	12	43.8356	241.8	0.4913	0.1107	0.4928	0.0958	SB					SALQSLLHL	9	42.3526	105.65	0.8611	0.0142	0.5693	0.045
HSLENSLIDIM	11	42.9444	122.2	0.7436	0.0309	0.5558	0.0504	SB					SALVHLEVL	9	43.2406	20.25	0.9502	0.0051	0.722	0.0098
YQPAPPSGYFM	11	65.1432	1361.68	0.414	0.1613	0.333	0.4253	SB					SAPKSISAL	9	42.9652	192.12	0.8574	0.0146	0.514	0.0758
YYPNLSLEEM	10	57.4284	8578.27	0.0429	2.3785	0.1629	2.6933	WB					SAPSSFDSL	9	40.9677	40.53	0.9391	0.0062	0.6578	0.0194
SQLYHNQSQGL	11	52.5546	12649.9	0.0581	1.7846	0.127	4.5963	WB					SAPSSPAEYI	10	45.0106	150.93	0.6917	0.0423	0.5363	0.0626
QSENNDIDEVI	11	53.4351	18569.4	0.0109	6.7148	0.0915	8.6006	WB					SAPVGGSYNL	10	44.287	417.87	0.5933	0.0659	0.4422	0.1596
ELISNASDALDK	12	49.1615	35583.1	0.0001	58.9394	0.0314	39.1427	WB					SAVHNDQFGLSHF	13	48.8483	1897.35	0.1084	0.9641	0.3024	0.5729
GTFLIQAQTVTP	12	52.4629	36905.7	0.0001	52.7778	0.0281	43.8954	WB					SAVTDFDFI	9	46.07	18.07	0.8207	0.0186	0.7325	0.0094
RVFQNEVLGTL	11	64.234	987.87	0.4427	0.1391	0.3627	0.3166	SB					SAVTNSGVHL	10	42.3457	28.04	0.9311	0.007	0.6919	0.0132
IEKPAGPPGILAL	13	45.9263	23218.1	0.0114	6.5137	0.0709	13.3417	WB					SAVVHEYAL	9	40.9714	256.65	0.6416	0.052	0.4873	0.1014
FSYQFSDLDSA	11	44.9451	7617.12	0.0159	5.1869	0.1739	2.327	WB					SAVWNSPPL	9	51.5642	12.05	0.9302	0.0071	0.77	0.0081
VTGYNDPETGNI	12	42.9483	23649.1	0.0012	23.5446	0.0692	13.8831	WB					SGGQNITIM	9	44.888	74.67	0.8546	0.0149	0.6014	0.035
ASAVSNNYIQTL	12	52.9755	909.48	0.1313	0.7883	0.3703	0.2937	WB					SGIKNPVSV	9	40.4973	27.93	0.9566	0.0044	0.6923	0.0132
STIQNADLIVVI	12	45.0232	91.24	0.4954	0.1086	0.5828	0.0398	SB					SGPIHPQVL	9	41.0879	839.64	0.6592	0.0481	0.3777	0.2774
IAFLSPKVDPSL	12	52.9802	12833.3	0.025	3.6854	0.1257	4.6995	WB					SGPVSLQTL	9	48.2259	168.48	0.8355	0.017	0.5262	0.0674
ELISNSSDALDK	12	39.5745	35780.4	0.0001	58.0303	0.0309	39.7995	WB					SIHGTNPQYL	10	42.9497	1138.21	0.4269	0.1502	0.3496	0.3619
FVAPREPGAVSY	12	52.1396	35069.4	0.0009	27.2254	0.0328	37.4962	WB					SLFGNNQPKI	10	45.1049	1935.86	0.125	0.8323	0.3005	0.5824
FVFLHIDNSGM	11	41.7422	8027.86	0.0255	3.6222	0.1691	2.4678	WB					SMAGNIIPAI	10	48.9671	271.88	0.2513	0.358	0.4819	0.1066
YQFDKVGILTL	11	54.2687	3915.65	0.2146	0.4391	0.2354	1.1377	SB					SMLINGYAL	9	52.8785	10.42	0.9258	0.0076	0.7834	0.0076
IQKTPQIQVYS	11	62.8498	28889	0.0022	17.4684	0.0507	22.0516	WB					SNLVNENTL	9	40.9301	66.81	0.8676	0.0136	0.6117	0.0323
FSNLDCVNDNY	11	48.5475	27869	0.0016	20.7025	0.054	20.2014	WB					SQFINFPIYV	10	45.2253	39.28	0.7034	0.0401	0.6607	0.0188
STQQYGSNVANM	12	56.1415	5744.24	0.0432	2.3644	0.2	1.679	WB					SQIKNEINI	9	40.7147	31.53	0.9354	0.0066	0.6811	0.0147
YGYSNRVVDLM	11	46.1805	32.19	0.7915	0.0221	0.6791	0.015	SB					SQLIILDTL	9	45.8743	90.13	0.8389	0.0166	0.584	0.0395
KQFPTLDLPFL	11	44.6119	4849.57	0.1662	0.6129	0.2156	1.3946	WB					SQLISLQHL	9	46.4141	462.25	0.6953	0.0416	0.4329	0.1777
AGIENKFGLYLP	12	45.951	3965.02	0.0433	2.3602	0.2342	1.1507	WB					SQLPLLSTI	9	43.3612	362.54	0.6694	0.0463	0.4553	0.137
ASLTNPFGKGAFI	13	44.9825	180.53	0.2172	0.4317	0.5198	0.0708	SB					SQLRNADVEL	10	50.1702	37.49	0.8525	0.0151	0.665	0.0179
FQYESKVFYL	10	44.7498	1016.76	0.2838	0.2996	0.36	0.3258	SB					SQLVLVEGF	9	49.4616	4357.38	0.1859	0.5321	0.2255	1.2572
APMNVDNLIMIV	12	45.35	27077.8	0.0006	32.6364	0.0567	18.8168	WB					SQPGPRLPFI	10	50.0091	5148.59	0.1689	0.6018	0.2101	1.4832
EYLLVMEYYP	10	46.5297	31868.1	0.0002	44.1875	0.0416	28.3276	WB					SQPVNPHSL	9	44.4794	75.01	0.9446	0.0057	0.601	0.0351
SQISNTEFLQVI	12	43.7945	31.16	0.7127	0.038	0.6822	0.0146	SB					SQPVPPADIYL	11	41.754	4797.69	0.3246	0.2553	0.2166	1.3804
DVTPADFSEWSK	12	64.0796	42799.8	0	79.0909	0.0144	73.2612	WB					SQVINVRTI	9	41.0422	21.55	0.9293	0.0072	0.7162	0.01
DIQMTQTTSSLSA	13	44.96	37135.2	0	74.2308	0.0275	44.7859	WB					SQVYNDAHI	9	49.0492	36.64	0.8184	0.0188	0.6672	0.0175
MGITECDNMLML	12	42.964	1257.02	0.0496	2.0854	0.3404	0.3937	WB					SSFVNGFVNA	10	45.1494	406.59	0.1814	0.5504	0.4447	0.1544
EEPRYISVGYVD	12	41.517	40782.6	0	74.6154	0.0188	61.8063	WB					SSIQNFQKGTL	11	40.8444	19.75	0.9587	0.0042	0.7243	0.0097
PSLLQTDETVNSE	13	61.996	45167.2	0	95	0.0094	87.5723	WB					SSLANILEL	9	51.4293	5.31	0.9913	0.0009	0.8457	0.0054
FMFNIADGGFTEL	13	42.08	3461.54	0.0186	4.6298	0.2468	1.0224	WB					SSLANLVGNL	10	40.6144	95	0.7127	0.038	0.5791	0.0412
DVQLQESGPGLVKP	14	48.0494	45246.4	0	96	0.0092	88.0405	WB					SSLFNTGFL	9	45.0972	14.76	0.887	0.0116	0.7512	0.0087
FAPVNVTTEVKSVE	14	42.9667	7546.25	0.003	14.878	0.1748	2.3019	WB					SSLHNEQVL	9	44.6677	23.3	0.962	0.0039	0.709	0.0108
TELNYKNTEPVLD	13	56.5053	27860	0.0001	63.125	0.0541	20.1857	WB					SSLLNKITNSL	11	45.1815	61.28	0.867	0.0136	0.6196	0.0302
GSERQNGVLNSWTD	14	42.9548	38762.2	0	96	0.0235	51.7699	WB					SSLSNEHVL	9	44.492	8.7	0.9905	0.001	0.8001	0.007
NVDLTTMP	8	42.9479	44761.9	0	70.3846	0.0102	85.1647	WB					SSPANISSL	9	45.8576	11.47	0.9871	0.0013	0.7745	0.0079
ASPLAASAIL	10	58.3151	9509.49	0.0539	1.9257	0.1534	3.0743	WB					SSPLNHIYL	9	50.998	5.91	0.991	0.0009	0.8358	0.0058
AAAASQIQAL	10	41.8364	13502.9	0.0444	2.3131	0.121	5.0742	WB					SSPLNLAHV	9	43.7124	13.22	0.9635	0.0037	0.7614	0.0084
SSIVAQTAGI	10	53.0813	3842.42	0.0827	1.2685	0.2372	1.1181	WB					SSPNSLGVVPYL	12	45.0914	2928.92	0.1852	0.5348	0.2622	0.8619
ALFSQDYMDPSQ	12	61.906	40305.7	0	77.7273	0.0199	59.2801	WB					SSVKNVPENL	10	42.967	120.16	0.8267	0.0179	0.5574	0.0496
AALYGKTEV	9	46.2262	2873.05	0.2399	0.3787	0.264	0.8466	SB					SSVVNFQII	9	46.7818	5.94	0.973	0.0028	0.8353	0.0058
PTTHSTPTI	9	47.8776	36034.8	0.0021	18.0152	0.0303	40.6817	WB					STLRNIQGL	9	40.509	155.85	0.8114	0.0196	0.5334	0.064
VSGIFPGLAP	10	45.2377	32132.7	0.0006	30.9808	0.0409	28.9828	WB					SVISMTEGM	9	45.4083	2090.32	0.2217	0.4184	0.2934	0.6252
WLLAAIASL	9	45.253	12771.1	0.01	7.1144	0.1261	4.6647	WB					SVLRLIQVI	9	38.2536	1427.63	0.3372	0.241	0.3287	0.4452
SAISPEQID	9	48.5715	32923.8	0.0008	28.4848	0.0386	31.102	WB					SVVRNVFDF	9	45.5456	1008.76	0.2769	0.3119	0.3608	0.3233
AFLVNGPMI	9	52.5401	1537.88	0.2157	0.4359	0.3218	0.4764	SB					TAIENSWIHL	10	55.8622	36.6	0.9291	0.0073	0.6673	0.0175
TPGPTELFI	9	42.6367	32752.9	0.0045	11.6447	0.0391	30.6462	WB					TAISNYMNQL	10	41.1732	65.13	0.8363	0.0169	0.614	0.0317
VAQPVNVQQ	9	53.0403	39048.4	0.0015	21.4184	0.0228	53.0938	WB					TALRLITAL	9	42.9644	263.57	0.6678	0.0465	0.4848	0.1038
ALYRGGNQL	9	49.166	12338.4	0.0661	1.5807	0.1293	4.4264	WB					TGVINAPETI	10	42.9639	173.72	0.5489	0.0855	0.5233	0.0688
SQSPQGRVM	9	53.0061	15943.4	0.0737	1.4269	0.1056	6.6004	WB					TGVTNRDLI	9	50.6986	24.26	0.8383	0.0167	0.7053	0.0114
MATLNIQSL	9	52.2506	66.53	0.8308	0.0175	0.612	0.0322	SB					TLIENGEKI	9	40.6759	239.73	0.6898	0.0426	0.4936	0.095
NTSNQVHTL	9	49.5726	24271.8	0.0257	3.5942	0.0668	14.7153	WB					TMFQNLFPSI	10	42.383	41.1	0.3768	0.1957	0.6565	0.0197
GTLEDQIIQ	9	46.1024	42437.3	0.0002	45.9333	0.0152	71.109	WB					TNPLNGQYI	9	43.847	128.82	0.7647	0.0261	0.551	0.0538
SSVASNISFI	10	47.739	44.99	0.6667	0.0467	0.6482	0.0228	SB					TQFPNLEVL	9	40.6876	35.56	0.9463	0.0055	0.6699	0.0169
INVTNASSLI	10	52.9945	2115.6	0.0928	1.1276	0.2923	0.6328	WB					TQIINITMT	9	51.295	898.74	0.277	0.3116	0.3714	0.2913
MALELVTVM	9	63.1093	152.54	0.6513	0.0495	0.5353	0.0631	SB					TQLSKTEFL	9	42.677	1029.28	0.5251	0.096	0.3589	0.3297
LQVKLNNVL	9	45.1023	9445.92	0.0724	1.4533	0.154	3.0448	WB					TQPLNHYFI	9	45.308	35.84	0.8629	0.014	0.6692	0.0171
RATQDALCGL	10	51.523	22256.8	0.0041	12.3479	0.0748	12.2288	WB					TSAQNVEFL	9	45.3904	11.4	0.9774	0.0023	0.7751	0.0079
VNMTDEEGR	9	52.5365	40636.7	0.0002	44.25	0.0192	61.0186	WB					TSPINPYKDHM	11	45.1123	219.55	0.774	0.0244	0.5017	0.0869
YSQVNKRY	8	45.2162	22085.6	0.0102	7.0039	0.0755	12.0345	WB					TSPTNFPAVL	10	49.2233	78.08	0.8588	0.0145	0.5972	0.0361
LSLLHADVVP	10	53.3786	22812	0.0007	29.1053	0.0725	12.8482	WB					VAAINPELL	9	52.1966	23.45	0.9521	0.0049	0.7084	0.0109
GRIMNLTVM	9	42.9624	1254.98	0.1784	0.5628	0.3406	0.3932	WB					VAGSDLTSYL	10	52.6275	7046.56	0.0644	1.6204	0.1811	2.1182
IVHQSLNIM	9	44.864	10020.3	0.062	1.6804	0.1486	3.3043	WB					VAILDSTTI	9	42.9669	72.7	0.7916	0.0221	0.6038	0.0343
LKPENIMLV	9	47.1341	6418.51	0.1409	0.7262	0.1897	1.8986	WB					VALLNETESVL	11	50.1814	125.57	0.7529	0.0288	0.5533	0.0521
ITITNDQNR	9	45.8778	29172	0.0036	13.4473	0.0498	22.5864	WB					VALLNKTNV	9	60.1048	44.07	0.8438	0.0161	0.6501	0.022
GLYVNNNGII	10	48.8027	9863.17	0.0146	5.4894	0.15	3.2348	WB					VANYAGQFNQDYL	13	41.0326	257.03	0.2346	0.3882	0.4871	0.1015
VIQSVPQPTI	10	45.1309	24708	0.0123	6.2026	0.0651	15.2983	WB					VAPASVITI	9	41.5285	205.81	0.7669	0.0257	0.5077	0.0813
LSGKGTILSDP	11	41.7561	42407.5	0	70.3846	0.0152	70.931	WB					VAPENLPAL	9	48.0991	22.55	0.9724	0.0028	0.712	0.0104
GGGGGGLRQASAT	13	51.9426	44210.8	0	89.1667	0.0114	81.8019	WB					VAPENLPALLL	11	53.006	125.77	0.8691	0.0134	0.5532	0.0522
WGTQSTLPTI	10	52.3591	16989.9	0.0033	13.9515	0.0998	7.3569	WB					VAPQSQELL	9	42.9675	410.18	0.7506	0.0293	0.4439	0.1561
ITAMANRTIL	10	49.8162	130.75	0.4509	0.1333	0.5496	0.0547	SB					VAPTNPQAV	9	45.0719	40.58	0.9433	0.0058	0.6577	0.0194
NPTANSNLYI	10	52.0275	18376.9	0.0056	10.3698	0.0925	8.4353	WB					VAPYNTTQF	9	41.2229	146.12	0.8326	0.0173	0.5393	0.0612
GQVVCAVPHNL	11	45.4856	12345.6	0.0105	6.8827	0.1293	4.4302	WB					VGAMSVLTQL	10	44.575	7929.88	0.0561	1.8479	0.1702	2.4349
SQPRSISESF	10	42.9632	8508.29	0.1457	0.6969	0.1637	2.6641	WB					VGVASTVHL	9	43.1587	3321.13	0.2532	0.3547	0.2506	0.9827
FLNFQNNLQ	9	52.835	42697.5	0.0001	61.0417	0.0146	72.6561	WB					VMAQNPYNAVI	11	48.9175	706.83	0.2385	0.3811	0.3936	0.2435
ISSHILLSIIA	11	40.7308	28918.1	0.0005	34.8333	0.0506	22.1068	WB					VQLQLLTAI	9	47.3478	571.48	0.4533	0.1317	0.4133	0.2069
APGSAPSGDGIAPA	14	61.1532	35347.5	0	71.9231	0.0321	38.3947	WB					VQNINIENL	9	41.8648	82.48	0.8789	0.0124	0.5922	0.0374
IGDISIKVPNL	11	57.4239	26045.1	0.0091	7.5784	0.0603	17.1948	WB					VQPEHIQYL	9	46.2213	1462.29	0.6001	0.0639	0.3264	0.4552
PTGVRGGVDWM	11	42.954	29260.8	0.0004	37.963	0.0495	22.7531	WB					VQPINQHVL	9	51.9522	146.94	0.8898	0.0113	0.5388	0.0615
SALSNDLLQNC	11	58.9795	1798.31	0.1697	0.5984	0.3073	0.5474	WB					VQSLNVDAI	9	47.711	61.26	0.778	0.0239	0.6197	0.0302
YAFQDDRYL	9	52.9559	327.3	0.5932	0.0659	0.4648	0.1234	SB					VQVPNLESLTL	11	44.9798	270.94	0.7393	0.0319	0.4823	0.1063
IQFVPADGPTF	11	53.3347	11684.3	0.0741	1.4188	0.1344	4.0784	WB					VSPANLPAVLL	11	46.2895	206.61	0.7332	0.0333	0.5073	0.0817
TMRSKEQAEL	10	60.1098	23855.2	0.0055	10.3855	0.0684	14.1529	WB					VSPTNPTKL	9	40.9304	96.02	0.9372	0.0064	0.5781	0.0416
NSSQSIGKHMK	11	69.2883	41456.6	0.0001	55.7576	0.0173	65.4484	WB					VSQVLSTYM	9	50.0676	672.53	0.4325	0.1462	0.3982	0.2349
TINNERAQYI	10	53.7657	26633.5	0.0025	16.2545	0.0582	18.1369	WB					VSVENFALL	9	45.5238	25.9	0.9201	0.0082	0.6992	0.0122
NAIWFLNLAVA	11	61.9043	1958.84	0.0444	2.3108	0.2994	0.588	WB					VTITNDGATI	10	50.6572	218.1	0.5097	0.1015	0.5023	0.0864
SLKEAKISEIQ	11	44.7551	39252.6	0.0002	46.0769	0.0224	54.0323	WB					VTPFNIDRL	9	40.8037	182.63	0.7957	0.0216	0.5187	0.0718
GTIAKVTVNTFP	12	45.0363	35319.6	0.0001	52.5556	0.0321	38.3069	WB					VTVENTKTI	9	42.9466	310.5	0.6991	0.0409	0.4697	0.1186
GIGNTFQGGANCI	13	47.4325	40349.3	0	81.875	0.0198	59.4996	WB					VTVLNITHL	9	44.9241	36.73	0.9328	0.0069	0.667	0.0175
FLFNGAEENVL	11	46.7867	13145.7	0.0194	4.4756	0.1235	4.872	WB					VVVENGELI	9	42.3767	129.41	0.723	0.0357	0.5505	0.0541
VTKSGTNNHVTV	12	44.8036	6879.24	0.027	3.4565	0.1833	2.0538	WB					WAFKNPDTI	9	47.0209	7.84	0.964	0.0037	0.8097	0.0067
RVAPEEHPTLL	11	56.0665	17327.2	0.0351	2.8153	0.0979	7.6158	WB					WAVSNREML	9	52.9917	25.31	0.8709	0.0132	0.7014	0.0119
IANNFINLSFL	11	64.1097	82.37	0.5101	0.1012	0.5923	0.0373	SB					WIVNREYL	8	45.8988	1679.76	0.1021	1.0241	0.3136	0.5151
NASSLLVNAAFY	12	48.0609	11168.7	0.0034	13.7068	0.1385	3.8303	WB					WVLVNEKPL	9	40.8006	288.23	0.3549	0.2203	0.4765	0.1119
SEEEENELEAL	11	44.6337	39486.4	0.001	25.3	0.0218	55.1141	WB					YAFKNPIYS	9	40.9594	123.48	0.5209	0.0973	0.5549	0.0511
TPVIGQPQHENT	12	69.0335	43494.9	0	73.8462	0.0129	77.44	WB					YAGQFNQDYL	10	39.4005	11.61	0.921	0.0081	0.7734	0.008
MSKLINHTKKL	11	64.0431	18597.6	0.0082	8.1169	0.0914	8.6266	WB					YAHINALEY	9	45.4828	926.89	0.3175	0.263	0.3686	0.2975
TPVISSVYTQMQ	12	69.2924	38600.2	0.0001	69.1176	0.0239	51.0164	WB					YALIHPATTL	10	43.4608	240.9	0.5963	0.065	0.4931	0.0954
QGVTEMISEEGGK	13	58.288	44757.1	0	85.8333	0.0102	85.1358	WB					YAPDNVWFI	9	49.0068	32.24	0.8996	0.0103	0.679	0.015
SVQAMQEKDESK	12	56.1036	41286	0.0001	68.8235	0.0177	64.505	WB					YAPGPGRSAL	10	42.9479	4010.19	0.2726	0.3196	0.2332	1.1625
PLSISPSPPCTAEP	14	69.3364	43430.4	0	98	0.013	77.0486	WB					YGGYNIEEI	9	45.2078	32.47	0.8647	0.0139	0.6783	0.0152
KALDKQSQQAKLEE	14	54.2054	43893.9	0.0001	67.0588	0.012	79.8514	WB					YGISNEKPEV	10	43.6492	258.15	0.5129	0.0999	0.4867	0.1019
AAIKLQELL	9	40.4415	232.65	0.7671	0.0256	0.4963	0.0921	SB					YGNVNVATL	9	42.6207	9.74	0.9679	0.0033	0.7897	0.0074
AAINNRLEL	9	50.5317	8.46	0.9846	0.0016	0.8026	0.0069	SB					YGVQGFPTI	9	42.8711	368.73	0.5447	0.0893	0.4538	0.1394
AAIPADMAAVL	11	43.4437	3708.2	0.1534	0.6652	0.2404	1.0839	WB					YILQHPGAVL	10	40.9459	7813.28	0.0541	1.9176	0.1716	2.3952
AAIRDGELI	9	45.0783	115.42	0.7372	0.0324	0.5611	0.0482	SB					YLMELGEVI	9	44.7013	1087.23	0.2745	0.3161	0.3538	0.3472
AALLNQQFL	9	53.8876	5.41	0.9929	0.0007	0.8439	0.0055	SB					YLVVNPNYL	9	45.1634	31.5	0.8884	0.0114	0.6811	0.0147
AALNNHVEV	9	53.1993	8.53	0.9778	0.0023	0.8019	0.007	SB					YMLANLTHL	9	48.9433	6.23	0.9635	0.0037	0.8309	0.0059
AALQNYNNEL	10	40.5759	38.53	0.9236	0.0078	0.6625	0.0184	SB					YQIAMVHYI	9	47.1197	33.43	0.7828	0.0233	0.6756	0.0157
AALVDLDSL	9	49.5273	59.47	0.8509	0.0153	0.6224	0.0295	SB					YQLENIQVL	9	40.7673	25.25	0.9561	0.0045	0.7016	0.0119
AANRNNDAL	9	44.239	31.54	0.9167	0.0085	0.681	0.0147	SB					YQLLLKELL	9	43.1576	571.65	0.5174	0.0984	0.4132	0.207
AAPESFEEL	9	60.3086	149.29	0.8896	0.0113	0.5373	0.0622	SB					YQPMNKFLL	9	42.0525	111.83	0.8003	0.021	0.564	0.0471
AAPIMLDLV	9	45.8633	130.87	0.6567	0.0485	0.5495	0.0548	SB					YQSMNSQYL	9	46.954	27.59	0.919	0.0083	0.6934	0.013
AAVENVSEL	9	48.9602	9.51	0.9866	0.0014	0.7918	0.0073	SB					YQVVNSYPL	9	52.6028	4.67	0.9496	0.0052	0.8577	0.005
AAVIDQERL	9	45.1442	981.29	0.5215	0.0971	0.3633	0.3144	SB					YQYLLVTAL	9	48.7855	529.9	0.5126	0.1	0.4203	0.1954
AAVVGLVAI	9	40.9527	466.34	0.4855	0.1136	0.4321	0.1788	SB					YSGANSIFL	9	43.2382	18.64	0.9328	0.0069	0.7296	0.0095
AAVVMLDRI	9	41.0151	97.72	0.6406	0.0523	0.5765	0.0422	SB					YSIGNGSVF	9	44.9514	88.21	0.7727	0.0246	0.586	0.039
AAVVNFEEAL	10	50.1377	21.58	0.8982	0.0104	0.7161	0.01	SB					YSIQGQHTI	9	40.7421	49.45	0.9064	0.0096	0.6395	0.0257
ADVTPADFSEWSK	13	65.173	39551.9	0.0001	55.303	0.0217	55.45	WB					YSLFNVISI	9	45.2841	5.37	0.9615	0.0039	0.8447	0.0055
AGIENKFGL	9	45.0253	249.35	0.7574	0.0278	0.4899	0.0987	SB					YSLSLQHTL	9	44.9999	93.47	0.8771	0.0126	0.5806	0.0406
AGLENPITV	9	41.2923	61.82	0.9132	0.0089	0.6188	0.0304	SB					YSPQNSDYLL	10	47.1335	16.34	0.9435	0.0058	0.7418	0.0091
AGPGFINVHL	10	47.9815	8523.96	0.133	0.7773	0.1635	2.6707	WB					YSPQNSDYLLAL	12	47.5508	32.43	0.8437	0.0161	0.6784	0.0151
AILENANVL	9	48.3388	168.78	0.7747	0.0244	0.526	0.0675	SB					YTIQNRVDI	9	41.039	24.26	0.89	0.0113	0.7053	0.0114
AIVRNLESL	9	40.7941	90.14	0.8081	0.02	0.584	0.0395	SB					YTLLNKAPEYL	11	48.067	28.71	0.8568	0.0147	0.6897	0.0135
ALDVANKIGII	11	52.5137	28358.8	0.0009	26.5	0.0524	21.0486	WB					YYPPSQIAQL	10	43.8222	14405.3	0.0666	1.5712	0.115	5.6192
ALGDGDFIKCL	11	57.0527	38345.8	0.0005	35.2121	0.0245	49.8416	WB
ALIGVDHSL	9	64.1318	20600.2	0.0285	3.3236	0.082	10.5022	WB
AMIELVERL	9	41.1297	987.72	0.4641	0.1243	0.3627	0.3165	SB
ANYAGQFNQDYL	12	40.8017	342.69	0.3054	0.2761	0.4605	0.129	SB
AQFYGLTPL	9	48.5068	336.56	0.4949	0.1089	0.4622	0.1265	SB
AQLELISRL	9	40.7753	3690.91	0.3282	0.2513	0.2409	1.0797	SB
AQLQNQQSF	9	40.7312	378.8	0.7368	0.0325	0.4513	0.1432	SB
AQLSLIASL	9	40.7606	1055.79	0.4925	0.1101	0.3565	0.3378	SB
AQLVNLREL	9	40.6663	34.08	0.9163	0.0086	0.6739	0.0161	SB
AQPINFSVSL	10	44.4342	359.98	0.6993	0.0409	0.456	0.136	SB
AQVFNLTLL	9	45.3007	42.44	0.8749	0.0128	0.6536	0.0206	SB
ASFSNGPVL	9	42.9648	18.8	0.9639	0.0037	0.7289	0.0095	SB
ASIDILHSI	9	64.197	1849.95	0.4687	0.1221	0.3047	0.5609	SB
ASLLDYDTV	9	56.1337	105.58	0.6575	0.0484	0.5694	0.045	SB
ASLQNFNISNL	11	38.8387	137.34	0.7546	0.0284	0.5451	0.0578	SB
ASLVNHVLL	9	42.9666	8.51	0.9812	0.0019	0.8021	0.0069	SB
ASMINVEYL	9	50.086	2.47	0.9978	0.0002	0.9166	0.0029	SB
ASMQNVVFDYL	11	44.5902	6.78	0.9735	0.0027	0.8231	0.0062	SB
ASPRGFPLGL	10	42.9612	8848.74	0.0999	1.048	0.1601	2.8038	WB
ASVDNLLHL	9	40.879	54.04	0.9306	0.0071	0.6313	0.0276	SB
ASVLLQDHI	9	42.1426	193.75	0.6565	0.0486	0.5132	0.0764	SB
ASYVNLPTIAL	11	42.9548	97.39	0.7307	0.0339	0.5768	0.0421	SB
ATILNLERV	9	44.5749	53.75	0.8268	0.0179	0.6318	0.0274	SB
ATKINITEM	9	42.9488	383.77	0.7011	0.0406	0.4501	0.1451	SB
ATVPNTIVV	9	44.3366	361.67	0.7001	0.0407	0.4556	0.1367	SB
AVVLNATWL	9	44.8839	145.92	0.6535	0.0491	0.5394	0.0612	SB
DALENLRVYL	10	41.4269	981.47	0.3905	0.1825	0.3633	0.3145	SB
DALSNVDLL	9	41.0105	132.67	0.7175	0.0369	0.5482	0.0556	SB
EKNNLNFL	8	51.1343	34098.4	0.0019	18.798	0.0354	34.5044	WB
ESFSDYPPL	9	44.0663	4598.16	0.1587	0.6434	0.2206	1.3246	WB
FAHIDGDHL	9	45.0291	114.33	0.7543	0.0285	0.562	0.0478	SB
FAIINSNPIEL	11	41.5328	8.83	0.9513	0.005	0.7987	0.0071	SB
FALANHLIKV	10	40.7515	83.43	0.475	0.1189	0.5911	0.0377	SB
FAPVNVTTEVK	11	64.2248	845.75	0.1756	0.5743	0.377	0.2789	WB
FAPVNVTTEVKSV	13	56.8462	119.57	0.3867	0.1861	0.5579	0.0495	SB
FAVVNHQGTL	10	41.1979	18.15	0.8964	0.0106	0.7321	0.0094	SB
FGGSNVHVI	9	40.5842	67.32	0.8158	0.0191	0.6109	0.0325	SB
FHSGTPAASF	10	44.7202	27233.8	0.0035	13.5717	0.0562	19.0638	WB
FIHEVNPSSL	10	42.4429	2913.97	0.182	0.5479	0.2627	0.8578	WB
FLVQNIHTL	9	42.5547	73.19	0.8592	0.0144	0.6032	0.0345	SB
FMLALKENI	9	42.967	549.6	0.2555	0.3505	0.4169	0.2002	SB
FQAHGLPEV	9	40.9964	7751.98	0.0989	1.0581	0.1723	2.374	WB
FQGTSLTHL	9	43.4251	1553.66	0.3907	0.1823	0.3208	0.4807	SB
FQLQQIEFL	9	40.2315	520.63	0.5733	0.0725	0.4219	0.1931	SB
FQSISTEFL	9	40.9094	1089.8	0.3692	0.2036	0.3536	0.348	SB
FQVILLEHI	9	45.1844	346.17	0.5027	0.105	0.4596	0.1305	SB
FQVQDKEVL	9	44.6639	1357.99	0.4666	0.1231	0.3333	0.4242	SB
FSHYMEENL	9	48.6732	1418.33	0.2738	0.3174	0.3293	0.4424	SB
FSNKITPIQSKEAY	14	55.8558	30140	0.0015	20.9367	0.0468	24.483	WB
FSNKNLEEL	9	41.0808	11.35	0.9752	0.0025	0.7755	0.0079	SB
FSVLNWDQV	9	42.9553	6.2	0.9316	0.007	0.8313	0.0059	SB
FVQTNISHL	9	40.6084	194.39	0.7437	0.0309	0.5129	0.0767	SB
FVVPNQKEL	9	40.959	710.52	0.6174	0.0589	0.3931	0.2444	SB
FVYENPVSL	9	40.8088	115.8	0.8476	0.0157	0.5608	0.0483	SB
GAGSSEPVTGLDAK	14	58.999	42606.1	0	88.3333	0.0148	72.1139	WB
GAIRNGGLYV	10	45.0582	116.11	0.5421	0.0906	0.5606	0.0484	SB
GALRLTTEF	9	49.2962	2899.56	0.251	0.3586	0.2632	0.8539	SB
GAPINVMFL	9	46.7111	19.78	0.9598	0.0041	0.7242	0.0097	SB
GAVTLQEYL	9	49.2048	191.35	0.707	0.0394	0.5144	0.0755	SB
GAVVNVADL	9	44.9189	41.08	0.8214	0.0185	0.6566	0.0197	SB
GGPANFGYPDPDYL	14	42.9674	716.45	0.1475	0.6895	0.3924	0.2458	WB
GNLSNFLIHL	10	47.9813	2055.73	0.2174	0.4309	0.295	0.6146	SB
GNNPNQVYI	9	46.1501	645.13	0.5682	0.0746	0.4021	0.2278	SB
GNVTNITTV	9	41.7553	236.06	0.6174	0.0589	0.495	0.0935	SB
GQAQNKVYL	9	41.3435	167.74	0.8302	0.0176	0.5266	0.0672	SB
GQVVIIHML	9	63.9591	6993.77	0.1823	0.5468	0.1818	2.0981	WB
GSIINISSI	9	48.9462	11.82	0.9505	0.0051	0.7718	0.008	SB
GSLINPNVI	9	45.3554	31.51	0.9134	0.0089	0.6811	0.0147	SB
GSLSSLLHL	9	39.759	2470.38	0.3159	0.2647	0.278	0.7347	SB
GTALQPQEGSAL	12	44.9336	25819.8	0.0092	7.5053	0.0611	16.8475	WB
GTFIIDPGGVIR	12	61.8285	40488.4	0	72.3077	0.0195	60.2142	WB
GVLNSWTDQDSKD	13	47.2827	45971.8	0	98	0.0078	91.9594	WB
GVLSLIDTL	9	40.5413	2333.69	0.2869	0.2963	0.2832	0.6951	SB
HAISNYYDNHL	11	40.7375	59.89	0.8409	0.0164	0.6218	0.0297	SB
HALDNGLFTL	10	40.8768	180.68	0.7874	0.0227	0.5197	0.0709	SB
HSILNAAIMI	10	40.8105	275.34	0.2933	0.2893	0.4808	0.1077	SB
IANINQELI	9	49.9223	18.19	0.9236	0.0078	0.7319	0.0094	SB
IEDVPFTEKDF	11	47.6172	38804.5	0.0017	20.1456	0.0234	51.9665	WB
IGGIGTVPVGR	11	42.9505	41760.4	0.0001	68.2353	0.0166	67.198	WB
IGLGNLTLI	9	44.6794	52.23	0.7898	0.0224	0.6344	0.0268	SB
IGMTKADLI	9	40.6208	1222.27	0.1768	0.5694	0.343	0.3847	WB
IGVSNFNPL	9	53.1055	12.36	0.8888	0.0114	0.7676	0.0082	SB
ILLKLTETI	9	47.5378	2801.95	0.1702	0.5964	0.2663	0.8266	WB
IMVRNIDLV	9	41.7095	22.33	0.7539	0.0286	0.7129	0.0103	SB
IQHSNIVTL	9	40.9932	27.38	0.9519	0.0049	0.6941	0.0129	SB
IQVKNEVSL	9	44.9755	172.57	0.8223	0.0184	0.5239	0.0685	SB
ISGHFDGVQDLM	12	42.967	24216.5	0.0016	20.2848	0.067	14.6411	WB
IYPPINVLPSL	11	49.9717	7365.55	0.0435	2.3533	0.177	2.2369	WB
KALGNEIVV	9	41.0208	171.57	0.745	0.0306	0.5245	0.0682	SB
KAPDNRETL	9	42.9466	29.58	0.9729	0.0028	0.687	0.0139	SB
KAPVNTAEL	9	46.7613	8.99	0.9893	0.0011	0.797	0.0071	SB
KGITNHLVAI	10	42.9618	82.47	0.6055	0.0623	0.5922	0.0374	SB
KGQLNADEI	9	40.7334	127.03	0.6786	0.0446	0.5523	0.0529	SB
KQPENVTLL	9	40.708	185.34	0.8669	0.0136	0.5173	0.0729	SB
KSLTNLSFL	9	48.9961	7.88	0.9721	0.0029	0.8092	0.0067	SB
KSYELPDGQVI	11	41.6243	6620.38	0.1113	0.9383	0.1869	1.9624	WB
KSYVNPTEL	9	43.1241	15.65	0.9763	0.0024	0.7458	0.0089	SB
KTGYNVDLL	9	42.9669	366.6	0.5595	0.0782	0.4543	0.1386	SB
KTHINIVVI	9	44.8259	62.63	0.8311	0.0175	0.6176	0.0307	SB
KTINLQSLI	9	42.5933	4570.48	0.1345	0.7678	0.2211	1.3166	WB
KTLLNPEYL	9	44.9919	13.51	0.9728	0.0028	0.7594	0.0084	SB
KTVTNAVVTV	10	45.8674	993.88	0.299	0.283	0.3621	0.3185	SB
KTVVNKDVF	9	45.0883	188.92	0.6731	0.0456	0.5156	0.0744	SB
LALENYITAL	10	49.7133	75.21	0.757	0.0279	0.6007	0.0351	SB
LALQNAYQAI	10	40.8073	112.54	0.4511	0.1332	0.5635	0.0473	SB
LAPVNIFKA	9	40.7003	273.51	0.4854	0.1136	0.4814	0.1071	SB
LGGMSRGLL	9	40.8896	22712.5	0.0025	16.3441	0.0729	12.7383	WB
LILQNTTVI	9	52.0698	99.38	0.6813	0.0441	0.5749	0.0428	SB
LMLQGVDLL	9	41.3671	1210.08	0.2409	0.3767	0.3439	0.3815	SB
LQLTNIEHF	9	37.3412	145.33	0.7462	0.0303	0.5398	0.061	SB
LQYPNPLPTL	10	43.5448	929.03	0.4994	0.1066	0.3684	0.298	SB
LSGLNDLLNVL	11	47.737	4659.01	0.0628	1.6615	0.2193	1.3419	WB
LSPQGRLSDVL	11	41.0314	6338.46	0.1313	0.7885	0.1909	1.872	WB
MAPENKVADWL	11	42.9651	71.47	0.8131	0.0194	0.6054	0.0339	SB
NAIINTLAV	9	46.2169	26.48	0.8262	0.018	0.6972	0.0125	SB
NALLNSLEF	9	46.4763	153.36	0.6801	0.0443	0.5349	0.0633	SB
NAPQNPESKL	10	44.8546	435.55	0.7408	0.0316	0.4384	0.1676	SB
NGVINGAEL	9	44.5258	99.65	0.75	0.0295	0.5747	0.0429	SB
NGVSNGLHL	9	40.912	220.44	0.7322	0.0336	0.5013	0.0873	SB
NQLSNHISSL	10	40.8049	662.59	0.496	0.1083	0.3996	0.2324	SB
NQMVGIEYI	9	40.7064	101.92	0.6625	0.0475	0.5726	0.0437	SB
NSIKNGILYL	10	52.1563	68.68	0.8251	0.0181	0.6091	0.033	SB
NSLLNSLPL	9	49.5852	8.67	0.931	0.0071	0.8004	0.007	SB
NSLNNLIEL	9	42.4655	24.83	0.952	0.0049	0.7031	0.0117	SB
NSLSNSESL	9	53.833	13.27	0.979	0.0021	0.761	0.0084	SB
NYSIYLNHTMLL	12	44.4571	8665.4	0.0015	20.8987	0.162	2.7293	WB
PETEQVNGLF	10	41.0174	44550.3	0.0001	60.8333	0.0107	83.8801	WB
PVTGLDAK	8	63.8618	47160.3	0	95	0.0054	95.8647	WB
QAIKNGQAL	9	41.1248	38.76	0.9458	0.0055	0.662	0.0186	SB
QGVLIRMYN	9	41.0729	28930.6	0.0002	45.0667	0.0506	22.1306	WB
QLLNTDYL	8	40.8273	863.48	0.251	0.3585	0.3751	0.2831	SB
QSIYPLHDVF	10	40.8112	9753.75	0.0545	1.904	0.1511	3.1858	WB
QSLTNILHL	9	44.9967	21.8	0.9671	0.0034	0.7152	0.01	SB
QSLVNLRELYL	11	45.0439	120.2	0.6061	0.0622	0.5574	0.0496	SB
RAADPLVGVFL	11	48.253	8188.13	0.1263	0.8233	0.1672	2.5276	WB
RALLLSTYI	9	47.9058	49.49	0.7431	0.031	0.6394	0.0257	SB
RALLNAESL	9	53.8926	6.63	0.9869	0.0013	0.8251	0.0061	SB
RAPTGYDVV	9	43.0445	184.81	0.6512	0.0495	0.5176	0.0727	SB
RATENDIYNFF	11	40.9518	1536.45	0.2881	0.2949	0.3219	0.476	SB
RIIENVDVI	9	45.3835	15.68	0.9226	0.0079	0.7456	0.0089	SB
RLITNSEEIAF	11	40.8055	1765.07	0.2263	0.4051	0.309	0.5386	SB
RQVQNTAITL	10	48.1106	231.99	0.6829	0.0438	0.4966	0.0919	SB
RSIKNVTEL	9	46.0791	6.65	0.9931	0.0007	0.8249	0.0061	SB
RSITNDSAVL	10	43.3255	67.35	0.7688	0.0252	0.6109	0.0325	SB
RSLSNATII	9	51.007	14.09	0.9337	0.0068	0.7555	0.0086	SB
RSVDNIQFLPFL	12	46.3	1187.88	0.3174	0.2631	0.3457	0.3756	SB
RSVLNNQLL	9	43.4868	62.94	0.8578	0.0146	0.6172	0.0308	SB
RTNVNFQYI	9	44.054	24.38	0.873	0.013	0.7048	0.0114	SB
RVGGNIEVL	9	40.8019	1121.76	0.5062	0.1032	0.3509	0.3573	SB
RVLQNLLTI	9	40.5298	28.73	0.8888	0.0114	0.6897	0.0135	SB
RVVDNPIYL	9	41.9484	363.68	0.77	0.025	0.455	0.1375	SB
SAAFNQLPHL	10	43.8934	117.49	0.6367	0.0534	0.5595	0.0488	SB
SAETNLEAL	9	43.7304	36.3	0.9166	0.0085	0.668	0.0173	SB
SAIFNNVMTL	10	43.4717	12.52	0.9525	0.0049	0.7664	0.0082	SB
SAINSIVYI	9	40.635	21.79	0.9145	0.0087	0.7152	0.01	SB
SAIVLKQEI	9	42.9475	144.27	0.7635	0.0264	0.5405	0.0607	SB
SALLLKDVL	9	48.8733	84.31	0.8221	0.0184	0.5902	0.0379	SB
SALQSLLHL	9	42.3526	105.65	0.8611	0.0142	0.5693	0.045	SB
SALVHLEVL	9	43.2406	20.25	0.9502	0.0051	0.722	0.0098	SB
SAPKSISAL	9	42.9652	192.12	0.8574	0.0146	0.514	0.0758	SB
SAPSSFDSL	9	40.9677	40.53	0.9391	0.0062	0.6578	0.0194	SB
SAPSSPAEYI	10	45.0106	150.93	0.6917	0.0423	0.5363	0.0626	SB
SAPVGGSYNL	10	44.287	417.87	0.5933	0.0659	0.4422	0.1596	SB
SAVHNDQFGLSHF	13	48.8483	1897.35	0.1084	0.9641	0.3024	0.5729	WB
SAVTDFDFI	9	46.07	18.07	0.8207	0.0186	0.7325	0.0094	SB
SAVTNSGVHL	10	42.3457	28.04	0.9311	0.007	0.6919	0.0132	SB
SAVVHEYAL	9	40.9714	256.65	0.6416	0.052	0.4873	0.1014	SB
SAVWNSPPL	9	51.5642	12.05	0.9302	0.0071	0.77	0.0081	SB
SGGQNITIM	9	44.888	74.67	0.8546	0.0149	0.6014	0.035	SB
SGIKNPVSV	9	40.4973	27.93	0.9566	0.0044	0.6923	0.0132	SB
SGPIHPQVL	9	41.0879	839.64	0.6592	0.0481	0.3777	0.2774	SB
SGPVSLQTL	9	48.2259	168.48	0.8355	0.017	0.5262	0.0674	SB
SIHGTNPQYL	10	42.9497	1138.21	0.4269	0.1502	0.3496	0.3619	SB
SIYPLGDIKI	10	40.5658	15102.3	0.023	3.9241	0.1106	6.0494	WB
SLFGNNQPKI	10	45.1049	1935.86	0.125	0.8323	0.3005	0.5824	WB
SMAGNIIPAI	10	48.9671	271.88	0.2513	0.358	0.4819	0.1066	SB
SMLINGYAL	9	52.8785	10.42	0.9258	0.0076	0.7834	0.0076	SB
SNLVNENTL	9	40.9301	66.81	0.8676	0.0136	0.6117	0.0323	SB
SQFINFPIYV	10	45.2253	39.28	0.7034	0.0401	0.6607	0.0188	SB
SQIKNEINI	9	40.7147	31.53	0.9354	0.0066	0.6811	0.0147	SB
SQLIILDTL	9	45.8743	90.13	0.8389	0.0166	0.584	0.0395	SB
SQLISLQHL	9	46.4141	462.25	0.6953	0.0416	0.4329	0.1777	SB
SQLPLLSTI	9	43.3612	362.54	0.6694	0.0463	0.4553	0.137	SB
SQLRNADVEL	10	50.1702	37.49	0.8525	0.0151	0.665	0.0179	SB
SQLVLVEGF	9	49.4616	4357.38	0.1859	0.5321	0.2255	1.2572	WB
SQPGPRLPFI	10	50.0091	5148.59	0.1689	0.6018	0.2101	1.4832	WB
SQPVNPHSL	9	44.4794	75.01	0.9446	0.0057	0.601	0.0351	SB
SQPVPPADIYL	11	41.754	4797.69	0.3246	0.2553	0.2166	1.3804	SB
SQVINVRTI	9	41.0422	21.55	0.9293	0.0072	0.7162	0.01	SB
SQVYNDAHI	9	49.0492	36.64	0.8184	0.0188	0.6672	0.0175	SB
SSFVNGFVNA	10	45.1494	406.59	0.1814	0.5504	0.4447	0.1544	WB
SSIQNFQKGTL	11	40.8444	19.75	0.9587	0.0042	0.7243	0.0097	SB
SSLANILEL	9	51.4293	5.31	0.9913	0.0009	0.8457	0.0054	SB
SSLANLVGNL	10	40.6144	95	0.7127	0.038	0.5791	0.0412	SB
SSLFNTGFL	9	45.0972	14.76	0.887	0.0116	0.7512	0.0087	SB
SSLHNEQVL	9	44.6677	23.3	0.962	0.0039	0.709	0.0108	SB
SSLLNKITNSL	11	45.1815	61.28	0.867	0.0136	0.6196	0.0302	SB
SSLSNEHVL	9	44.492	8.7	0.9905	0.001	0.8001	0.007	SB
SSPANISSL	9	45.8576	11.47	0.9871	0.0013	0.7745	0.0079	SB
SSPLNHIYL	9	50.998	5.91	0.991	0.0009	0.8358	0.0058	SB
SSPLNLAHV	9	43.7124	13.22	0.9635	0.0037	0.7614	0.0084	SB
SSPNSLGVVPYL	12	45.0914	2928.92	0.1852	0.5348	0.2622	0.8619	WB
SSVKNVPENL	10	42.967	120.16	0.8267	0.0179	0.5574	0.0496	SB
SSVVNFQII	9	46.7818	5.94	0.973	0.0028	0.8353	0.0058	SB
STLRNIQGL	9	40.509	155.85	0.8114	0.0196	0.5334	0.064	SB
SVISMTEGM	9	45.4083	2090.32	0.2217	0.4184	0.2934	0.6252	SB
SVLRLIQVI	9	38.2536	1427.63	0.3372	0.241	0.3287	0.4452	SB
SVVRNVFDF	9	45.5456	1008.76	0.2769	0.3119	0.3608	0.3233	SB
TAIENSWIHL	10	55.8622	36.6	0.9291	0.0073	0.6673	0.0175	SB
TAISNYMNQL	10	41.1732	65.13	0.8363	0.0169	0.614	0.0317	SB
TALRLITAL	9	42.9644	263.57	0.6678	0.0465	0.4848	0.1038	SB
TELNYKNTEPVL	12	64.2185	15254.2	0.0012	23.2589	0.1097	6.1491	WB
TGVINAPETI	10	42.9639	173.72	0.5489	0.0855	0.5233	0.0688	SB
TGVTNRDLI	9	50.6986	24.26	0.8383	0.0167	0.7053	0.0114	SB
TLIENGEKI	9	40.6759	239.73	0.6898	0.0426	0.4936	0.095	SB
TMFQNLFPSI	10	42.383	41.1	0.3768	0.1957	0.6565	0.0197	SB
TNPLNGQYI	9	43.847	128.82	0.7647	0.0261	0.551	0.0538	SB
TPADFSEWSK	10	53.0536	40982.5	0.0001	54.6667	0.0184	62.882	WB
TPVISGGPYEYR	12	62.4222	40928.9	0.0001	65.8824	0.0185	62.594	WB
TPVITGAPYEYR	12	61.2264	41261.9	0	70.3846	0.0178	64.3765	WB
TQFPNLEVL	9	40.6876	35.56	0.9463	0.0055	0.6699	0.0169	SB
TQIINITMT	9	51.295	898.74	0.277	0.3116	0.3714	0.2913	SB
TQLSKTEFL	9	42.677	1029.28	0.5251	0.096	0.3589	0.3297	SB
TQPLNHYFI	9	45.308	35.84	0.8629	0.014	0.6692	0.0171	SB
TSAQNVEFL	9	45.3904	11.4	0.9774	0.0023	0.7751	0.0079	SB
TSPINPYKDHM	11	45.1123	219.55	0.774	0.0244	0.5017	0.0869	SB
TSPTNFPAVL	10	49.2233	78.08	0.8588	0.0145	0.5972	0.0361	SB
TVKNVDII	8	41.0093	10386.8	0.0328	2.9614	0.1452	3.4621	WB
VAAINPELL	9	52.1966	23.45	0.9521	0.0049	0.7084	0.0109	SB
VAGSDLTSYL	10	52.6275	7046.56	0.0644	1.6204	0.1811	2.1182	WB
VAGVGAGLAYL	11	49.1932	9055.03	0.0258	3.5808	0.1579	2.8858	WB
VAILDSTTI	9	42.9669	72.7	0.7916	0.0221	0.6038	0.0343	SB
VALLNETESVL	11	50.1814	125.57	0.7529	0.0288	0.5533	0.0521	SB
VALLNKTNV	9	60.1048	44.07	0.8438	0.0161	0.6501	0.022	SB
VANYAGQFNQDYL	13	41.0326	257.03	0.2346	0.3882	0.4871	0.1015	SB
VAPASVITI	9	41.5285	205.81	0.7669	0.0257	0.5077	0.0813	SB
VAPENLPAL	9	48.0991	22.55	0.9724	0.0028	0.712	0.0104	SB
VAPENLPALLL	11	53.006	125.77	0.8691	0.0134	0.5532	0.0522	SB
VAPQSQELL	9	42.9675	410.18	0.7506	0.0293	0.4439	0.1561	SB
VAPTNPQAV	9	45.0719	40.58	0.9433	0.0058	0.6577	0.0194	SB
VAPYNTTQF	9	41.2229	146.12	0.8326	0.0173	0.5393	0.0612	SB
VGAMSVLTQL	10	44.575	7929.88	0.0561	1.8479	0.1702	2.4349	WB
VGVASTVHL	9	43.1587	3321.13	0.2532	0.3547	0.2506	0.9827	SB
VMAQNPYNAVI	11	48.9175	706.83	0.2385	0.3811	0.3936	0.2435	SB
VQAQLGLPPL	10	44.395	6202.5	0.0512	2.0137	0.1929	1.8261	WB
VQLQLLTAI	9	47.3478	571.48	0.4533	0.1317	0.4133	0.2069	SB
VQNINIENL	9	41.8648	82.48	0.8789	0.0124	0.5922	0.0374	SB
VQPEHIQYL	9	46.2213	1462.29	0.6001	0.0639	0.3264	0.4552	SB
VQPINQHVL	9	51.9522	146.94	0.8898	0.0113	0.5388	0.0615	SB
VQSLNVDAI	9	47.711	61.26	0.778	0.0239	0.6197	0.0302	SB
VQVLVPLPQ	9	64.5612	33144.7	0.0008	28.6364	0.038	31.7263	WB
VQVPNLESLTL	11	44.9798	270.94	0.7393	0.0319	0.4823	0.1063	SB
VSPANLPAVLL	11	46.2895	206.61	0.7332	0.0333	0.5073	0.0817	SB
VSPTNPTKL	9	40.9304	96.02	0.9372	0.0064	0.5781	0.0416	SB
VSQVLSTYM	9	50.0676	672.53	0.4325	0.1462	0.3982	0.2349	SB
VSVENFALL	9	45.5238	25.9	0.9201	0.0082	0.6992	0.0122	SB
VTITNDGATI	10	50.6572	218.1	0.5097	0.1015	0.5023	0.0864	SB
VTPFNIDRL	9	40.8037	182.63	0.7957	0.0216	0.5187	0.0718	SB
VTVENTKTI	9	42.9466	310.5	0.6991	0.0409	0.4697	0.1186	SB
VTVLNITHL	9	44.9241	36.73	0.9328	0.0069	0.667	0.0175	SB
VVVENGELI	9	42.3767	129.41	0.723	0.0357	0.5505	0.0541	SB
WAFKNPDTI	9	47.0209	7.84	0.964	0.0037	0.8097	0.0067	SB
WAVSNREML	9	52.9917	25.31	0.8709	0.0132	0.7014	0.0119	SB
WIVNREYL	8	45.8988	1679.76	0.1021	1.0241	0.3136	0.5151	WB
WVLVNEKPL	9	40.8006	288.23	0.3549	0.2203	0.4765	0.1119	SB
YAFKNPIYS	9	40.9594	123.48	0.5209	0.0973	0.5549	0.0511	SB
YAGQFNQDYL	10	39.4005	11.61	0.921	0.0081	0.7734	0.008	SB
YAHINALEY	9	45.4828	926.89	0.3175	0.263	0.3686	0.2975	SB
YALIHPATTL	10	43.4608	240.9	0.5963	0.065	0.4931	0.0954	SB
YAPAPFLHIMPA	12	50.6954	2875.48	0.0159	5.1892	0.2639	0.8473	WB
YAPDNVWFI	9	49.0068	32.24	0.8996	0.0103	0.679	0.015	SB
YAPGPGRSAL	10	42.9479	4010.19	0.2726	0.3196	0.2332	1.1625	SB
YDALDVANKIGII	13	50.6128	31794.4	0.0001	54.2222	0.0418	28.1441	WB
YGGYNIEEI	9	45.2078	32.47	0.8647	0.0139	0.6783	0.0152	SB
YGISNEKPEV	10	43.6492	258.15	0.5129	0.0999	0.4867	0.1019	SB
YGNVNVATL	9	42.6207	9.74	0.9679	0.0033	0.7897	0.0074	SB
YGVQGFPTI	9	42.8711	368.73	0.5447	0.0893	0.4538	0.1394	SB
YILQHPGAVL	10	40.9459	7813.28	0.0541	1.9176	0.1716	2.3952	WB
YLMELGEVI	9	44.7013	1087.23	0.2745	0.3161	0.3538	0.3472	SB
YLVVNPNYL	9	45.1634	31.5	0.8884	0.0114	0.6811	0.0147	SB
YMLANLTHL	9	48.9433	6.23	0.9635	0.0037	0.8309	0.0059	SB
YQIAMVHYI	9	47.1197	33.43	0.7828	0.0233	0.6756	0.0157	SB
YQLENIQVL	9	40.7673	25.25	0.9561	0.0045	0.7016	0.0119	SB
YQLLLKELL	9	43.1576	571.65	0.5174	0.0984	0.4132	0.207	SB
YQPMNKFLL	9	42.0525	111.83	0.8003	0.021	0.564	0.0471	SB
YQSMNSQYL	9	46.954	27.59	0.919	0.0083	0.6934	0.013	SB
YQVVNSYPL	9	52.6028	4.67	0.9496	0.0052	0.8577	0.005	SB
YQYLLVTAL	9	48.7855	529.9	0.5126	0.1	0.4203	0.1954	SB
YSGANSIFL	9	43.2382	18.64	0.9328	0.0069	0.7296	0.0095	SB
YSIGNGSVF	9	44.9514	88.21	0.7727	0.0246	0.586	0.039	SB
YSIQGQHTI	9	40.7421	49.45	0.9064	0.0096	0.6395	0.0257	SB
YSLFNVISI	9	45.2841	5.37	0.9615	0.0039	0.8447	0.0055	SB
YSLSLQHTL	9	44.9999	93.47	0.8771	0.0126	0.5806	0.0406	SB
YSLTISNLEQED	12	53.1399	31456.4	0.0001	56.3636	0.0428	27.3716	WB
YSPQNSDYLL	10	47.1335	16.34	0.9435	0.0058	0.7418	0.0091	SB
YSPQNSDYLLAL	12	47.5508	32.43	0.8437	0.0161	0.6784	0.0151	SB
YTIQNRVDI	9	41.039	24.26	0.89	0.0113	0.7053	0.0114	SB
YTLLNKAPEYL	11	48.067	28.71	0.8568	0.0147	0.6897	0.0135	SB
YVAVVNVHS	9	53.2045	33018.3	0.0007	29.7895	0.0384	31.3697	WB
YYPPSQIAQL	10	43.8222	14405.3	0.0666	1.5712	0.115	5.6192	WB
YYPPSQYLLPVL	12	48.0898	14783.3	0.0163	5.093	0.1126	5.8524	WB

## Sheet: H-2Kb
H-2Kb pMHCI - sequence	Length	Tm	Predcited BA [nM]	EL-score	EL_Rank	BA-score	BA_Rank	Binding strength category						H-2Kb pMHCI - sequence	Tm	Predcited BA [nM]	EL-score	EL_Rank	BA-score	BA_Rank
TSYKFESV	8	53.1908	7.75	0.9603	0.0061	0.8108	0.0145	SB						TSYKFESV	53.1908	7.75	0.9603	0.0061	0.8108	0.0145
ITYRFYLINL	10	64.1762	5.85	0.5726	0.1676	0.8367	0.0107	SB						ITYRFYLINL	64.1762	5.85	0.5726	0.1676	0.8367	0.0107
KNYLFNAI	8	49.5823	6.8	0.9091	0.017	0.8229	0.0127	SB						KNYLFNAI	49.5823	6.8	0.9091	0.017	0.8229	0.0127
DLFPSFVRL	9	47.8211	161.05	0.62	0.1295	0.5303	0.4221	SB						DLFPSFVRL	47.8211	161.05	0.62	0.1295	0.5303	0.4221
SDLFPSFVRL	10	50.1117	118.01	0.3724	0.4153	0.5591	0.3247	SB						SDLFPSFVRL	50.1117	118.01	0.3724	0.4153	0.5591	0.3247
VISDLFPSFVRL	12	52.5564	85.22	0.2357	0.7866	0.5892	0.2464	WB						VISDLFPSFVRL	52.5564	85.22	0.2357	0.7866	0.5892	0.2464
AAFEFINSL	9	52.3712	8.72	0.962	0.0059	0.7998	0.0171	SB						AAFEFINSL	52.3712	8.72	0.962	0.0059	0.7998	0.0171
ITYRFYLI	8	48.4892	3.61	0.9173	0.015	0.8814	0.0075	SB						ITYRFYLI	48.4892	3.61	0.9173	0.015	0.8814	0.0075
KSYNYMLL	8	52.3379	3.42	0.9689	0.0048	0.8864	0.0072	SB						KSYNYMLL	52.3379	3.42	0.9689	0.0048	0.8864	0.0072
LNFRFENV	8	48.5529	7.33	0.8751	0.0297	0.8159	0.0137	SB						LNFRFENV	48.5529	7.33	0.8751	0.0297	0.8159	0.0137
SIFRFLNI	8	55.1061	3.15	0.9751	0.0038	0.894	0.0067	SB						SIFRFLNI	55.1061	3.15	0.9751	0.0038	0.894	0.0067
VIYIFTVRL	9	64.0973	4.5	0.9761	0.0037	0.8611	0.0088	SB						VIYIFTVRL	64.0973	4.5	0.9761	0.0037	0.8611	0.0088
VTKYYINL	8	44.7649	10.44	0.9069	0.0175	0.7832	0.0253	SB						VTKYYINL	44.7649	10.44	0.9069	0.0175	0.7832	0.0253
LSYIYNML	8	51.2732	3.7	0.9568	0.0067	0.8792	0.0076	SB						LSYIYNML	51.2732	3.7	0.9568	0.0067	0.8792	0.0076
AIVNYANL	8	49.6735	10.71	0.8884	0.0231	0.7808	0.0261	SB						AIVNYANL	49.6735	10.71	0.8884	0.0231	0.7808	0.0261
LNYVDYNI	8	52.3857	214.06	0.179	1.0708	0.504	0.523	WB						LNYVDYNI	52.3857	214.06	0.179	1.0708	0.504	0.523
IMFSKSLNF	9	45.064	19.89	0.6771	0.1026	0.7236	0.0603	SB						IMFSKSLNF	45.064	19.89	0.6771	0.1026	0.7236	0.0603
MALLFKNL	8	48.1988	8.44	0.8534	0.0347	0.8028	0.0163	SB						MALLFKNL	48.1988	8.44	0.8534	0.0347	0.8028	0.0163
LMYIFAAL	8	52.652	5.71	0.8028	0.0506	0.839	0.0104	SB						LMYIFAAL	52.652	5.71	0.8028	0.0506	0.839	0.0104
VSLDYINTM	9	52.6811	25.41	0.8414	0.0375	0.701	0.0768	SB						VSLDYINTM	52.6811	25.41	0.8414	0.0375	0.701	0.0768
TIVDFLSRL	9	53.3784	13.49	0.9208	0.014	0.7595	0.035	SB						TIVDFLSRL	53.3784	13.49	0.9208	0.014	0.7595	0.035
VMVTITQNV	9	49.5149	250.67	0.3158	0.5342	0.4894	0.5991	WB						VMVTITQNV	49.5149	250.67	0.3158	0.5342	0.4894	0.5991
SQYEYTTV	8	48.0412	16.99	0.8955	0.0204	0.7382	0.0501	SB						SQYEYTTV	48.0412	16.99	0.8955	0.0204	0.7382	0.0501
LFKNLATSI	9	40.6872	7594.08	0.0139	7.8513	0.1742	10.7982	WB						VNIDQTTPM	44.6701	222.57	0.3581	0.4431	0.5004	0.5418
MITMSAFL	8	42.9525	1066.01	0.0244	5.5056	0.3557	1.9329	WB						IMIEISNV	47.1426	91.66	0.5086	0.2272	0.5824	0.2622
VNIDQTTPM	9	44.6701	222.57	0.3581	0.4431	0.5004	0.5418	SB						IIAVFDSKL	39.7579	99.42	0.492	0.242	0.5749	0.28
IMIEISNV	8	47.1426	91.66	0.5086	0.2272	0.5824	0.2622	SB						SQYYFSML	49.4368	3.88	0.9655	0.0053	0.8747	0.0079
IIAVFDSKL	9	39.7579	99.42	0.492	0.242	0.5749	0.28	SB						KCIEYVTL	47.9077	338.74	0.5235	0.2141	0.4616	0.7792
SQYYFSML	8	49.4368	3.88	0.9655	0.0053	0.8747	0.0079	SB						EQFTFSNV	46.4397	119.25	0.4939	0.2403	0.5581	0.328
KCIEYVTL	8	47.9077	338.74	0.5235	0.2141	0.4616	0.7792	SB						VNKYFENPL	44.9765	51.93	0.4793	0.2546	0.6349	0.1568
EQFTFSNV	8	46.4397	119.25	0.4939	0.2403	0.5581	0.328	SB						KQYIVATL	44.3387	64.53	0.734	0.0785	0.6149	0.1905
YIDHIVNI	8	44.7165	6300.24	0.046	3.5538	0.1914	8.9605	WB						SFIEVISL	46.1125	223.89	0.5403	0.199	0.4999	0.5446
VNKYFENPL	9	44.9765	51.93	0.4793	0.2546	0.6349	0.1568	SB						KVIGFVSI	42.7695	82.55	0.7077	0.0919	0.5921	0.2395
ITQYLDFL	8	48.905	1388.25	0.0843	2.2301	0.3312	2.405	WB						KAIDFSQM	44.7462	42.86	0.8267	0.0414	0.6527	0.127
KQYIVATL	8	44.3387	64.53	0.734	0.0785	0.6149	0.1905	SB						SSFTKMAEI	49.289	30.8	0.6869	0.0987	0.6832	0.0898
DVTTFLSM	8	48.9884	5033.79	0.0707	2.5452	0.2122	7.2112	WB						ALYYVHSL	40.4539	90	0.6926	0.0969	0.5841	0.2583
SFIEVISL	8	46.1125	223.89	0.5403	0.199	0.4999	0.5446	SB						VIYDFLVKT	43.5241	48.13	0.6972	0.0954	0.642	0.1449
KVIGFVSI	8	42.7695	82.55	0.7077	0.0919	0.5921	0.2395	SB						VAVIFSGL	45.1163	5.78	0.9335	0.0105	0.8378	0.0106
KAIDFSQM	8	44.7462	42.86	0.8267	0.0414	0.6527	0.127	SB						VGIGFSNL	45.1792	6.23	0.9582	0.0065	0.831	0.0116
SSFTKMAEI	9	49.289	30.8	0.6869	0.0987	0.6832	0.0898	SB						RVMEYINRL	46.6766	30.14	0.8467	0.0363	0.6852	0.0885
ALYYVHSL	8	40.4539	90	0.6926	0.0969	0.5841	0.2583	SB						VSVLVALL	42.4503	37.7	0.6239	0.1265	0.6645	0.1116
VIYDFLVKT	9	43.5241	48.13	0.6972	0.0954	0.642	0.1449	SB						ASYLLAAL	50.4594	6.17	0.9194	0.0144	0.8318	0.0115
ECKTHASSI	9	44.3776	22128.6	0.0038	15.9045	0.0753	38.8247	WB						RNYEYLIRL	45.1837	5.69	0.9753	0.0038	0.8393	0.0104
VAVIFSGL	8	45.1163	5.78	0.9335	0.0105	0.8378	0.0106	SB						VAPGYPLL	52.8509	25.69	0.8839	0.0249	0.7	0.0778
VGIGFSNL	8	45.1792	6.23	0.9582	0.0065	0.831	0.0116	SB						AVVELVTV	41.0034	2627.85	0.1635	1.1718	0.2723	4.0536
RVMEYINRL	9	46.6766	30.14	0.8467	0.0363	0.6852	0.0885	SB						AVPIFVAL	50.3475	49.06	0.8534	0.0348	0.6402	0.1478
FTCGGILT	8	47.0894	31591.4	0.0002	58.5294	0.0424	67.4954	WB						SVVPFIAV	40.8283	61.48	0.7602	0.0667	0.6193	0.1832
VSVLVALL	8	42.4503	37.7	0.6239	0.1265	0.6645	0.1116	SB						VAAVFRGL	50.2884	13.31	0.8743	0.03	0.7608	0.0344
LAGVENSK	8	58.4963	38132.8	0.0001	73.6957	0.025	88.3206	WB						VALLFTGI	48.4316	11.73	0.7523	0.0698	0.7724	0.0291
ASYLLAAL	8	50.4594	6.17	0.9194	0.0144	0.8318	0.0115	SB						GIILFSAI	48.4316	419.16	0.2043	0.9231	0.4419	0.9302
IDPGGVIR	8	61.8137	37095.1	0.0003	46.15	0.0276	85.3754	WB						SGLKYVAV	50.5441	85.31	0.5999	0.1449	0.5891	0.2466
RNYEYLIRL	9	45.1837	5.69	0.9753	0.0038	0.8393	0.0104	SB						AALIYTSV	48.6227	85.04	0.5891	0.1536	0.5893	0.2459
VAPGYPLL	8	52.8509	25.69	0.8839	0.0249	0.7	0.0778	SB						VGISYISV	40.7736	26.84	0.7925	0.0545	0.6959	0.0811
GLVMAPLL	8	52.9207	10031.7	0.0061	12.517	0.1485	14.4782	WB						ASVTFSLL	45.5421	11.76	0.8635	0.0325	0.7722	0.0291
AVVELVTV	8	41.0034	2627.85	0.1635	1.1718	0.2723	4.0536	WB						ASLYSLAL	49.9121	277.46	0.2895	0.6028	0.4801	0.6528
LGLDLVTV	8	41.0034	4459.01	0.0594	2.9506	0.2234	6.444	WB						SAMVFSAM	53.066	10.55	0.8055	0.0496	0.7822	0.0256
AVPIFVAL	8	50.3475	49.06	0.8534	0.0348	0.6402	0.1478	SB						VSFDFHGRRM	44.8857	16.22	0.6537	0.1128	0.7425	0.0462
SVVPFIAV	8	40.8283	61.48	0.7602	0.0667	0.6193	0.1832	SB						AVLNFTAL	44.8029	14.62	0.8873	0.0236	0.7521	0.0386
VAAVFRGL	8	50.2884	13.31	0.8743	0.03	0.7608	0.0344	SB						SAARFALL	45.9038	6.89	0.9246	0.013	0.8216	0.0129
PGLYLSAL	8	61.027	7448.34	0.013	8.1619	0.176	10.587	WB						VAYEAPSL	46.8213	33.7	0.8717	0.0306	0.6749	0.0987
VALLFTGI	8	48.4316	11.73	0.7523	0.0698	0.7724	0.0291	SB						AIVEFATV	64.1089	49.98	0.7155	0.0889	0.6385	0.1507
GIILFSAI	8	48.4316	419.16	0.2043	0.9231	0.4419	0.9302	WB						SAVVYAQL	47.5993	8.07	0.9483	0.008	0.8071	0.0151
SGLKYVAV	8	50.5441	85.31	0.5999	0.1449	0.5891	0.2466	SB						IGTIYGNL	41.0251	26.58	0.5806	0.1609	0.6968	0.0806
AALIYTSV	8	48.6227	85.04	0.5891	0.1536	0.5893	0.2459	SB						VTVVFSTV	47.4802	18.47	0.8083	0.0485	0.7305	0.0555
VGISYISV	8	40.7736	26.84	0.7925	0.0545	0.6959	0.0811	SB						AVYAFLGL	53.5779	4.86	0.9606	0.0061	0.8538	0.0092
ASVTFSLL	8	45.5421	11.76	0.8635	0.0325	0.7722	0.0291	SB						SSPYFAAL	48.2246	5.02	0.958	0.0065	0.8509	0.0094
ASLYSLAL	8	49.9121	277.46	0.2895	0.6028	0.4801	0.6528	WB						VIAELVNV	46.8859	561.6	0.3018	0.5706	0.4149	1.1695
SAMVFSAM	8	53.066	10.55	0.8055	0.0496	0.7822	0.0256	SB						IMGVVPLL	53.1713	1188.48	0.0953	1.9925	0.3456	2.1178
LGGNLNRT	8	49.9282	31670.8	0.0003	51.8939	0.0422	67.7647	WB						IMIALPSL	47.8929	60.31	0.6111	0.1363	0.6211	0.1803
VSFDFHGRRM	10	44.8857	16.22	0.6537	0.1128	0.7425	0.0462	SB						SAFFFGAL	48.9281	3.41	0.9398	0.0093	0.8866	0.0072
AVLNFTAL	8	44.8029	14.62	0.8873	0.0236	0.7521	0.0386	SB						SALTVQQL	61.2532	639.98	0.5132	0.2232	0.4028	1.2888
SAARFALL	8	45.9038	6.89	0.9246	0.013	0.8216	0.0129	SB						SIIKATNL	42.9655	88.3	0.746	0.0727	0.5859	0.2541
VAYEAPSL	8	46.8213	33.7	0.8717	0.0306	0.6749	0.0987	SB						ASLVFPLL	49.7628	10.56	0.9002	0.0191	0.7821	0.0257
AIVEFATV	8	64.1089	49.98	0.7155	0.0889	0.6385	0.1507	SB						AVPEFQGL	43.8328	193.95	0.7252	0.0833	0.5131	0.4832
SAVVYAQL	8	47.5993	8.07	0.9483	0.008	0.8071	0.0151	SB						VNFSPANL	46.6627	7.29	0.9417	0.009	0.8164	0.0137
IGTIYGNL	8	41.0251	26.58	0.5806	0.1609	0.6968	0.0806	SB						SLVELTSL	44.4867	764.16	0.3106	0.5475	0.3864	1.4705
VTVVFSTV	8	47.4802	18.47	0.8083	0.0485	0.7305	0.0555	SB						IVVAFAEL	44.654	6.47	0.9394	0.0094	0.8275	0.0121
AVYAFLGL	8	53.5779	4.86	0.9606	0.0061	0.8538	0.0092	SB						SNLVFLGL	48.9908	8.02	0.9109	0.0165	0.8075	0.015
AELVLVNP	8	46.5311	31117.8	0.0004	45.2	0.0438	65.8744	WB						VNLLFSGL	42.961	3.66	0.9532	0.0072	0.8801	0.0076
SSPYFAAL	8	48.2246	5.02	0.958	0.0065	0.8509	0.0094	SB						SGPEFTLL	48.9341	42.09	0.8577	0.0338	0.6544	0.1244
GLDAASYYAPVR	12	67.6314	16334.9	0	85	0.1034	25.6331	WB						VIATFSLL	44.866	8.48	0.9025	0.0185	0.8024	0.0164
VIAELVNV	8	46.8859	561.6	0.3018	0.5706	0.4149	1.1695	WB						GILTFSNL	51.1944	27.65	0.7395	0.0759	0.6932	0.083
IMGVVPLL	8	53.1713	1188.48	0.0953	1.9925	0.3456	2.1178	WB						SIANFTNV	49.0968	41.2	0.6938	0.0965	0.6563	0.1219
IMIALPSL	8	47.8929	60.31	0.6111	0.1363	0.6211	0.1803	SB						SNPEFSSV	48.0063	95.84	0.7387	0.0763	0.5783	0.272
PKFEVIDKPQS	11	40.8779	38965.7	0	86.9231	0.023	90.5072	WB						TTVAFTQV	42.2513	206.45	0.507	0.2286	0.5074	0.5055
SAFFFGAL	8	48.9281	3.41	0.9398	0.0093	0.8866	0.0072	SB						AIHNFPAV	42.9649	226.64	0.458	0.2814	0.4988	0.5505
LGGQTNLR	8	61.8209	35988.1	0.0001	61.9231	0.0304	82.0073	WB						SIYEASSL	51.1645	26.94	0.8595	0.0334	0.6956	0.0814
INEAGISR	8	61.8489	30709.1	0.0005	38.8286	0.0451	64.4982	WB						AFYSIVGL	42.9646	122.7	0.5313	0.2071	0.5555	0.3368
SALTVQQL	8	61.2532	639.98	0.5132	0.2232	0.4028	1.2888	SB						SSFFVNGL	49.0063	11.8	0.8616	0.0329	0.7719	0.0292
SIIKATNL	8	42.9655	88.3	0.746	0.0727	0.5859	0.2541	SB						KGFTFSAL	45.7683	6.74	0.9215	0.0138	0.8236	0.0126
ASLVFPLL	8	49.7628	10.56	0.9002	0.0191	0.7821	0.0257	SB						SGYKFGVL	48.0142	7.85	0.9174	0.015	0.8096	0.0147
AVPEFQGL	8	43.8328	193.95	0.7252	0.0833	0.5131	0.4832	SB						ASPIFTHV	51.2413	44.3	0.8436	0.037	0.6496	0.1321
VNFSPANL	8	46.6627	7.29	0.9417	0.009	0.8164	0.0137	SB						SGFEFTSV	41.0157	9.15	0.9405	0.0092	0.7953	0.0184
SLVELTSL	8	44.4867	764.16	0.3106	0.5475	0.3864	1.4705	WB						SSFVFSTV	53.084	3.25	0.9736	0.0041	0.8911	0.0069
IVVAFAEL	8	44.654	6.47	0.9394	0.0094	0.8275	0.0121	SB						SALPFVKL	42.9657	13.15	0.9654	0.0053	0.7619	0.0338
SNLVFLGL	8	48.9908	8.02	0.9109	0.0165	0.8075	0.015	SB						KGLDFALL	54.2436	34.98	0.7114	0.0907	0.6714	0.1028
VNLLFSGL	8	42.961	3.66	0.9532	0.0072	0.8801	0.0076	SB						VIAYLANI	64.4097	99.47	0.3098	0.5497	0.5749	0.2801
SGPEFTLL	8	48.9341	42.09	0.8577	0.0338	0.6544	0.1244	SB						SVLQFLGL	51.4536	8.78	0.9292	0.0117	0.7992	0.0173
VIATFSLL	8	44.866	8.48	0.9025	0.0185	0.8024	0.0164	SB						IALYIGNL	52.5347	28.06	0.6221	0.1279	0.6918	0.084
GILTFSNL	8	51.1944	27.65	0.7395	0.0759	0.6932	0.083	SB						SRILFGAL	42.9605	199.28	0.2568	0.6975	0.5106	0.4921
SIANFTNV	8	49.0968	41.2	0.6938	0.0965	0.6563	0.1219	SB						SVFIAQNV	48.3515	81.57	0.6215	0.1283	0.5932	0.2369
SNPEFSSV	8	48.0063	95.84	0.7387	0.0763	0.5783	0.272	SB						AALDFKNV	44.7371	141.31	0.5747	0.1659	0.5424	0.3804
TTVAFTQV	8	42.2513	206.45	0.507	0.2286	0.5074	0.5055	SB						SQAVFARV	40.772	76.26	0.542	0.1973	0.5994	0.2224
AIHNFPAV	8	42.9649	226.64	0.458	0.2814	0.4988	0.5505	SB						TIVIMTSL	44.6914	532.61	0.3339	0.4903	0.4198	1.1186
SIYEASSL	8	51.1645	26.94	0.8595	0.0334	0.6956	0.0814	SB						GVLEYANL	53.0238	37.49	0.7269	0.0823	0.6651	0.1109
AFYSIVGL	8	42.9646	122.7	0.5313	0.2071	0.5555	0.3368	SB						TAISFNLL	47.0153	14.71	0.8817	0.0261	0.7515	0.0389
SSFFVNGL	8	49.0063	11.8	0.8616	0.0329	0.7719	0.0292	SB						SGPTYIKL	51.4359	52.67	0.8673	0.0316	0.6336	0.1591
KGFTFSAL	8	45.7683	6.74	0.9215	0.0138	0.8236	0.0126	SB						SGLKYVNV	52.9316	33.52	0.782	0.0584	0.6754	0.0982
SGYKFGVL	8	48.0142	7.85	0.9174	0.015	0.8096	0.0147	SB						SALIYSNL	54.2312	4.45	0.9682	0.0049	0.862	0.0087
ASPIFTHV	8	51.2413	44.3	0.8436	0.037	0.6496	0.1321	SB						AVFARVAF	49.0321	364.95	0.3507	0.4576	0.4547	0.8325
SGFEFTSV	8	41.0157	9.15	0.9405	0.0092	0.7953	0.0184	SB						SGLQYNSL	42.9489	39.01	0.809	0.0482	0.6614	0.1156
SSFVFSTV	8	53.084	3.25	0.9736	0.0041	0.8911	0.0069	SB						SSPLYTTL	48.7138	11.74	0.9564	0.0067	0.7724	0.0291
SALPFVKL	8	42.9657	13.15	0.9654	0.0053	0.7619	0.0338	SB						AGPTFNYL	49.5385	65.07	0.7246	0.0836	0.6141	0.1917
KGLDFALL	8	54.2436	34.98	0.7114	0.0907	0.6714	0.1028	SB						AGFAFLTGV	47.3727	23.21	0.6285	0.1238	0.7094	0.0693
VIAYLANI	8	64.4097	99.47	0.3098	0.5497	0.5749	0.2801	WB						IRIVLVGL	45.7403	1277.02	0.13	1.4835	0.339	2.2506
SVLQFLGL	8	51.4536	8.78	0.9292	0.0117	0.7992	0.0173	SB						TVFSFLGL	49.1006	4.08	0.9661	0.0052	0.87	0.0082
IALYIGNL	8	52.5347	28.06	0.6221	0.1279	0.6918	0.084	SB						AGYDYLAL	42.9637	12.73	0.9203	0.0142	0.7649	0.0324
SRILFGAL	8	42.9605	199.28	0.2568	0.6975	0.5106	0.4921	WB						SVVLMSHL	43.6032	82.74	0.6507	0.1141	0.5919	0.24
SVFIAQNV	8	48.3515	81.57	0.6215	0.1283	0.5932	0.2369	SB						ATIRVTNL	41.9909	114.34	0.7076	0.092	0.562	0.315
AALDFKNV	8	44.7371	141.31	0.5747	0.1659	0.5424	0.3804	SB						HALSFSNL	44.9832	17.05	0.8746	0.0299	0.7379	0.0503
ALFKGDNL	8	48.3458	2117.93	0.094	2.0197	0.2922	3.3873	WB						VAPRYVAL	40.6991	9.88	0.948	0.008	0.7883	0.0211
SQAVFARV	8	40.772	76.26	0.542	0.1973	0.5994	0.2224	SB						SIIKLTTL	43.2929	83.03	0.8074	0.0489	0.5916	0.2407
TIVIMTSL	8	44.6914	532.61	0.3339	0.4903	0.4198	1.1186	SB						ISPLFAEL	51.8359	4.64	0.9704	0.0046	0.8582	0.009
SFVELGQV	8	49.0902	2387.17	0.0762	2.4067	0.2811	3.745	WB						VIAGFNRL	45.4994	30.54	0.8253	0.0419	0.684	0.0893
DLGIYANI	8	53.3749	10760.6	0.0051	13.7877	0.142	15.6558	WB						TNLVYPAL	52.1922	14.65	0.8548	0.0344	0.7519	0.0387
GVLEYANL	8	53.0238	37.49	0.7269	0.0823	0.6651	0.1109	SB						SIYAPARL	44.5888	17.69	0.8952	0.0205	0.7345	0.0527
TAISFNLL	8	47.0153	14.71	0.8817	0.0261	0.7515	0.0389	SB						LIAVFKSL	49.1395	110.93	0.564	0.175	0.5648	0.3056
SGPTYIKL	8	51.4359	52.67	0.8673	0.0316	0.6336	0.1591	SB						SMLDIALL	42.96	142.63	0.4127	0.3485	0.5416	0.3833
SGLKYVNV	8	52.9316	33.52	0.782	0.0584	0.6754	0.0982	SB						ANVVFTQL	48.8688	16.6	0.9267	0.0124	0.7403	0.0482
SALIYSNL	8	54.2312	4.45	0.9682	0.0049	0.862	0.0087	SB						VIYPMAVV	47.6816	34.59	0.7129	0.0902	0.6725	0.1015
AVFARVAF	8	49.0321	364.95	0.3507	0.4576	0.4547	0.8325	SB						VNVRFTGV	51.8142	11.9	0.8406	0.0376	0.7711	0.0295
SGLQYNSL	8	42.9489	39.01	0.809	0.0482	0.6614	0.1156	SB						VTILFADL	45.0871	5.1	0.9016	0.0187	0.8495	0.0095
SSPLYTTL	8	48.7138	11.74	0.9564	0.0067	0.7724	0.0291	SB						TNVDFPSL	45.0097	45.75	0.8244	0.0423	0.6467	0.1371
AGPTFNYL	8	49.5385	65.07	0.7246	0.0836	0.6141	0.1917	SB						VFTEVANL	51.5581	171.74	0.392	0.3813	0.5244	0.4432
AGFAFLTGV	9	47.3727	23.21	0.6285	0.1238	0.7094	0.0693	SB						ASPEFTKL	47.1537	43.8	0.9171	0.015	0.6507	0.1304
IRIVLVGL	8	45.7403	1277.02	0.13	1.4835	0.339	2.2506	WB						VIISFNSL	52.3918	5.17	0.9734	0.0041	0.8482	0.0096
TVFSFLGL	8	49.1006	4.08	0.9661	0.0052	0.87	0.0082	SB						AVVSFKEL	42.9673	68.16	0.7911	0.055	0.6098	0.1987
AGYDYLAL	8	42.9637	12.73	0.9203	0.0142	0.7649	0.0324	SB						SNLVYAII	45.668	25.6	0.5335	0.2052	0.7003	0.0775
SVVLMSHL	8	43.6032	82.74	0.6507	0.1141	0.5919	0.24	SB						TALAFRTL	48.6883	17.71	0.8724	0.0305	0.7343	0.0528
ATIRVTNL	8	41.9909	114.34	0.7076	0.092	0.562	0.315	SB						SSPVYIDL	50.4937	35.18	0.7891	0.0558	0.6709	0.1035
HALSFSNL	8	44.9832	17.05	0.8746	0.0299	0.7379	0.0503	SB						SRAVFSNL	42.485	165.98	0.4059	0.3593	0.5275	0.432
VAPRYVAL	8	40.6991	9.88	0.948	0.008	0.7883	0.0211	SB						TAVKFSQL	40.9371	22.22	0.9168	0.0151	0.7134	0.0667
SIIKLTTL	8	43.2929	83.03	0.8074	0.0489	0.5916	0.2407	SB						LSILYVSV	42.5338	30.92	0.6667	0.1071	0.6829	0.0901
YVPGIMPI	8	41.5431	4733.39	0.0406	3.9011	0.2179	6.8126	WB						SLLIYVSV	42.5338	318.23	0.3223	0.5171	0.4674	0.7345
ISPLFAEL	8	51.8359	4.64	0.9704	0.0046	0.8582	0.009	SB						SSPKFSEL	51.9069	18.4	0.9469	0.0082	0.7308	0.0553
VIAGFNRL	8	45.4994	30.54	0.8253	0.0419	0.684	0.0893	SB						SMYVPGKL	42.1767	65.97	0.6489	0.1149	0.6128	0.1938
TNLVYPAL	8	52.1922	14.65	0.8548	0.0344	0.7519	0.0387	SB						STLLYGQL	42.1171	9.53	0.8859	0.0241	0.7916	0.0194
SIYAPARL	8	44.5888	17.69	0.8952	0.0205	0.7345	0.0527	SB						SGLTYIKI	45.8434	171.49	0.5378	0.2013	0.5245	0.4428
AEVVRFLG	8	41.1362	27240.6	0.0003	51.7424	0.0561	53.3752	WB						SSPEFSEL	42.966	21.35	0.9258	0.0126	0.7171	0.0644
LIAVFKSL	8	49.1395	110.93	0.564	0.175	0.5648	0.3056	SB						SSVLFETL	40.9794	15.74	0.9017	0.0187	0.7452	0.0437
SMLDIALL	8	42.96	142.63	0.4127	0.3485	0.5416	0.3833	SB						TFFTPGNL	40.6218	204.81	0.3278	0.5029	0.5081	0.5017
ANVVFTQL	8	48.8688	16.6	0.9267	0.0124	0.7403	0.0482	SB						SAPTFINF	47.3613	42.69	0.8165	0.0453	0.6531	0.1264
VIYPMAVV	8	47.6816	34.59	0.7129	0.0902	0.6725	0.1015	SB						TIVVFNGM	45.1625	78.09	0.4926	0.2414	0.5972	0.2275
VNVRFTGV	8	51.8142	11.9	0.8406	0.0376	0.7711	0.0295	SB						SPYSPAYL	53.0912	1152.95	0.2445	0.7492	0.3484	2.0617
VNVPVIGGH	9	44.8013	17057.5	0.0041	15.3801	0.0994	27.0915	WB						TSYLMGNL	64.8642	7.43	0.8552	0.0343	0.8146	0.0139
VTILFADL	8	45.0871	5.1	0.9016	0.0187	0.8495	0.0095	SB						ATYIFNGL	44.5243	3.99	0.9713	0.0044	0.872	0.0081
TNVDFPSL	8	45.0097	45.75	0.8244	0.0423	0.6467	0.1371	SB						IAPLFPAGL	45.4076	11.27	0.8995	0.0193	0.7761	0.0278
VFTEVANL	8	51.5581	171.74	0.392	0.3813	0.5244	0.4432	SB						AVYSFEAL	53.5004	4.98	0.9754	0.0038	0.8516	0.0094
ASPEFTKL	8	47.1537	43.8	0.9171	0.015	0.6507	0.1304	SB						VNELLSLL	42.7786	798.59	0.1959	0.9713	0.3823	1.5186
IISMLSNV	8	47.4014	765.89	0.0947	2.0057	0.3862	1.4729	WB						ATFSFESL	64.1077	6.11	0.9622	0.0058	0.8327	0.0113
VIISFNSL	8	52.3918	5.17	0.9734	0.0041	0.8482	0.0096	SB						STFTFADL	50.3821	3.26	0.9596	0.0062	0.8907	0.0069
AVVSFKEL	8	42.9673	68.16	0.7911	0.055	0.6098	0.1987	SB						SNHVFNAL	41.0232	19.53	0.8637	0.0324	0.7253	0.0591
SNLVYAII	8	45.668	25.6	0.5335	0.2052	0.7003	0.0775	SB						AVPIFIEL	44.052	69.26	0.8493	0.0357	0.6083	0.2015
NVSLLALY	8	48.9881	23464.9	0.0009	30.9487	0.0699	42.3812	WB						ANINFPNL	49.0232	7.77	0.9622	0.0058	0.8105	0.0145
TALAFRTL	8	48.6883	17.71	0.8724	0.0305	0.7343	0.0528	SB						AQLTYHGL	41.74	101.98	0.5941	0.1493	0.5726	0.2856
SSPVYIDL	8	50.4937	35.18	0.7891	0.0558	0.6709	0.1035	SB						AFVRLPSL	42.9673	246.53	0.394	0.3781	0.491	0.591
SRAVFSNL	8	42.485	165.98	0.4059	0.3593	0.5275	0.432	SB						AVYIFYGA	45.4503	94.57	0.3412	0.4761	0.5795	0.2691
TAVKFSQL	8	40.9371	22.22	0.9168	0.0151	0.7134	0.0667	SB						NAPEFVKV	45.8803	1587.39	0.3404	0.4776	0.3189	2.6814
FKNLATSI	8	40.8772	17320.7	0.0066	12.011	0.098	27.6402	WB						SGYKYVGM	44.9952	6.55	0.963	0.0057	0.8263	0.0123
LSILYVSV	8	42.5338	30.92	0.6667	0.1071	0.6829	0.0901	SB						VNYEPLGL	45.9492	28.38	0.8744	0.03	0.6908	0.0847
SLLIYVSV	8	42.5338	318.23	0.3223	0.5171	0.4674	0.7345	WB						VAPSFGTLL	48.7678	25.47	0.8329	0.0394	0.7008	0.077
SSPKFSEL	8	51.9069	18.4	0.9469	0.0082	0.7308	0.0553	SB						TIVMLTNL	45.0485	92.71	0.5286	0.2095	0.5814	0.2647
VMTSLQSI	8	46.9661	2048.45	0.0767	2.3954	0.2953	3.2971	WB						SIIVFNLV	52.4618	34.4	0.7147	0.0894	0.673	0.1009
SMYVPGKL	8	42.1767	65.97	0.6489	0.1149	0.6128	0.1938	SB						VNFLVSLL	47.3007	7.78	0.8911	0.0221	0.8104	0.0145
STLLYGQL	8	42.1171	9.53	0.8859	0.0241	0.7916	0.0194	SB						SVVELVML	45.1771	337.37	0.527	0.2109	0.462	0.7763
SGLTYIKI	8	45.8434	171.49	0.5378	0.2013	0.5245	0.4428	SB						SSLLYPLI	42.5458	20.16	0.6939	0.0965	0.7224	0.0611
SSPEFSEL	8	42.966	21.35	0.9258	0.0126	0.7171	0.0644	SB						ETPVYANL	44.7143	285.86	0.4925	0.2416	0.4773	0.6687
SSVLFETL	8	40.9794	15.74	0.9017	0.0187	0.7452	0.0437	SB						RSAAFNQL	42.9666	141.76	0.5638	0.1752	0.5421	0.3814
TFFTPGNL	8	40.6218	204.81	0.3278	0.5029	0.5081	0.5017	WB						SNVVFLEV	44.8172	62.82	0.6472	0.1157	0.6173	0.1865
SAPTFINF	8	47.3613	42.69	0.8165	0.0453	0.6531	0.1264	SB						SIIMVTNL	38.4309	35.58	0.7812	0.0587	0.6699	0.1048
TIVVFNGM	8	45.1625	78.09	0.4926	0.2414	0.5972	0.2275	SB						SVVSFRLV	42.9638	49.93	0.6837	0.0998	0.6386	0.1506
SPYSPAYL	8	53.0912	1152.95	0.2445	0.7492	0.3484	2.0617	WB						SAVIFRTL	51.122	15.53	0.9242	0.0131	0.7465	0.0425
TLSVVHEL	8	45.0386	7633.79	0.0478	3.4561	0.1737	10.8551	WB						SALVFTRL	52.5004	4.68	0.9797	0.0031	0.8574	0.009
TSYLMGNL	8	64.8642	7.43	0.8552	0.0343	0.8146	0.0139	SB						ASIIRYAI	48.6502	295.7	0.2404	0.7665	0.4742	0.6866
ATYIFNGL	8	44.5243	3.99	0.9713	0.0044	0.872	0.0081	SB						SSLFLKVL	45.1549	186.74	0.4824	0.2507	0.5167	0.4708
IAPLFPAGL	9	45.4076	11.27	0.8995	0.0193	0.7761	0.0278	SB						SSLLFVKL	49.0881	6.03	0.9711	0.0045	0.834	0.0111
AVYSFEAL	8	53.5004	4.98	0.9754	0.0038	0.8516	0.0094	SB						SIDQFANL	41.767	47.54	0.7257	0.083	0.6431	0.143
AWLQVSPV	8	45.5754	1487.07	0.0549	3.1381	0.3249	2.5381	WB						SGIDFKQL	43.5606	62.14	0.8829	0.0254	0.6183	0.1848
PDVLIVVSRHLT	12	56.2128	33800.9	0	95.7692	0.0362	74.9242	WB						SIVDFLTL	49.0806	18.91	0.9121	0.0162	0.7283	0.0571
LIDPVPQIAALAK	13	64.1107	32833.8	0.0001	79.4737	0.0389	71.6947	WB						KNLVYGTI	42.9663	81.09	0.391	0.3829	0.5938	0.2356
LQQVAVQL	8	45.005	6298.74	0.0458	3.5608	0.1915	8.9585	WB						INDSYLAL	45.0467	209.22	0.4471	0.2951	0.5061	0.512
VNELLSLL	8	42.7786	798.59	0.1959	0.9713	0.3823	1.5186	WB						SSLGFERL	40.826	17.19	0.8876	0.0235	0.7371	0.0509
ATFSFESL	8	64.1077	6.11	0.9622	0.0058	0.8327	0.0113	SB						VTVDFSKL	45.8927	15.4	0.9243	0.013	0.7473	0.0418
STFTFADL	8	50.3821	3.26	0.9596	0.0062	0.8907	0.0069	SB						TIVTVYNV	40.6021	1019.06	0.1404	1.3698	0.3598	1.8644
SNHVFNAL	8	41.0232	19.53	0.8637	0.0324	0.7253	0.0591	SB						SIIIFTNT	45.0882	146.62	0.3051	0.5618	0.539	0.3918
AVPIFIEL	8	44.052	69.26	0.8493	0.0357	0.6083	0.2015	SB						ATQVYTIL	50.9756	323.58	0.3901	0.3844	0.4658	0.7464
EPPVYANL	8	44.811	4414.99	0.0933	2.0363	0.2243	6.3895	WB						TILSFTNL	53.5513	4.85	0.9723	0.0043	0.8541	0.0092
ANINFPNL	8	49.0232	7.77	0.9622	0.0058	0.8105	0.0145	SB						TALTYLNL	49.0032	8.53	0.9127	0.0161	0.8019	0.0165
AQLTYHGL	8	41.74	101.98	0.5941	0.1493	0.5726	0.2856	SB						AVGNHVAKL	56.7737	1573.32	0.2093	0.8957	0.3197	2.6619
AFVRLPSL	8	42.9673	246.53	0.394	0.3781	0.491	0.591	SB						SSDLFNNL	43.1413	68.33	0.6823	0.1003	0.6096	0.199
AVYIFYGA	8	45.4503	94.57	0.3412	0.4761	0.5795	0.2691	SB						SMVDVVML	44.9241	734.72	0.2992	0.5773	0.3901	1.4286
NAPEFVKV	8	45.8803	1587.39	0.3404	0.4776	0.3189	2.6814	SB						FAPIYADL	46.5503	73.73	0.5012	0.2338	0.6025	0.215
SGYKYVGM	8	44.9952	6.55	0.963	0.0057	0.8263	0.0123	SB						SVSRFNSL	45.243	35.55	0.8427	0.0372	0.67	0.1047
VNYEPLGL	8	45.9492	28.38	0.8744	0.03	0.6908	0.0847	SB						SLIEFSTI	40.701	51.87	0.7069	0.0922	0.6351	0.1566
VAPSFGTLL	9	48.7678	25.47	0.8329	0.0394	0.7008	0.077	SB						VITTYSLL	53.9126	19.91	0.742	0.0747	0.7235	0.0604
TIVMLTNL	8	45.0485	92.71	0.5286	0.2095	0.5814	0.2647	SB						VHLDLLSL	54.2557	699.54	0.2991	0.5776	0.3946	1.3774
SIIVFNLV	8	52.4618	34.4	0.7147	0.0894	0.673	0.1009	SB						VAVPLIGKL	41.0767	345.47	0.5143	0.2222	0.4598	0.7933
VNFLVSLL	8	47.3007	7.78	0.8911	0.0221	0.8104	0.0145	SB						STVEFTNL	51.3802	6.19	0.9723	0.0043	0.8315	0.0115
MVTITQNV	8	49.4402	7662.75	0.019	6.4518	0.1734	10.8963	WB						SSLEFSQI	51.3962	12.89	0.8952	0.0205	0.7637	0.0329
SVVELVML	8	45.1771	337.37	0.527	0.2109	0.462	0.7763	SB						SSVLYSRV	43.4239	14.48	0.8355	0.0388	0.753	0.0382
SSLLYPLI	8	42.5458	20.16	0.6939	0.0965	0.7224	0.0611	SB						FALVFKSV	53.052	177.01	0.4226	0.3328	0.5216	0.4532
ETPVYANL	8	44.7143	285.86	0.4925	0.2416	0.4773	0.6687	SB						VSPIILRL	45.9966	60.93	0.8548	0.0344	0.6202	0.1819
RSAAFNQL	8	42.9666	141.76	0.5638	0.1752	0.5421	0.3814	SB						SGYSFTHI	48.8571	6.25	0.9634	0.0057	0.8306	0.0116
SNVVFLEV	8	44.8172	62.82	0.6472	0.1157	0.6173	0.1865	SB						ATMLFAEL	47.5362	6.03	0.9326	0.0107	0.8339	0.0112
SIIMVTNL	8	38.4309	35.58	0.7812	0.0587	0.6699	0.1048	SB						AAYGFRNI	44.8296	10.76	0.909	0.017	0.7804	0.0263
SVVSFRLV	8	42.9638	49.93	0.6837	0.0998	0.6386	0.1506	SB						SMILFTSL	41.578	5.61	0.9495	0.0078	0.8405	0.0102
SAVIFRTL	8	51.122	15.53	0.9242	0.0131	0.7465	0.0425	SB						SIVPMVHL	49.0112	120.96	0.7491	0.0713	0.5568	0.3323
SALVFTRL	8	52.5004	4.68	0.9797	0.0031	0.8574	0.009	SB						SVVVFQSF	40.8336	156.16	0.5955	0.1483	0.5332	0.412
ASIIRYAI	8	48.6502	295.7	0.2404	0.7665	0.4742	0.6866	WB						GVFSFSRL	48.26	7.66	0.9358	0.0099	0.8118	0.0143
SSLFLKVL	8	45.1549	186.74	0.4824	0.2507	0.5167	0.4708	SB						SSIVFGRF	59.6247	27.3	0.7044	0.093	0.6944	0.0822
SSLLFVKL	8	49.0881	6.03	0.9711	0.0045	0.834	0.0111	SB						KSFLFSAL	48.6013	2.65	0.9812	0.0029	0.9098	0.0057
SIDQFANL	8	41.767	47.54	0.7257	0.083	0.6431	0.143	SB						NNYVYAGL	47.3699	7.03	0.8952	0.0205	0.8198	0.0132
SGIDFKQL	8	43.5606	62.14	0.8829	0.0254	0.6183	0.1848	SB						NVYNYAGL	49.1006	9.74	0.8739	0.0301	0.7896	0.02
FSEIVLSI	8	46.1125	12024.8	0.0176	6.7808	0.1317	17.6831	WB						ATFPFAML	50.3973	4.1	0.9748	0.0039	0.8696	0.0082
SIVDFLTL	8	49.0806	18.91	0.9121	0.0162	0.7283	0.0571	SB						ATFLYAEV	41.0836	6.8	0.8931	0.0213	0.8228	0.0127
KNLVYGTI	8	42.9663	81.09	0.391	0.3829	0.5938	0.2356	SB						ASFLYAEI	45.0214	5.03	0.9169	0.0151	0.8508	0.0094
INDSYLAL	8	45.0467	209.22	0.4471	0.2951	0.5061	0.512	SB						VISTFFTV	42.9499	65.71	0.5254	0.2124	0.6132	0.1932
SSLGFERL	8	40.826	17.19	0.8876	0.0235	0.7371	0.0509	SB						VMVQPINL	45.2136	147.61	0.5608	0.1782	0.5384	0.3939
VTVDFSKL	8	45.8927	15.4	0.9243	0.013	0.7473	0.0418	SB						ITIPMIPL	40.7746	65.06	0.5498	0.1894	0.6141	0.1917
TIVTVYNV	8	40.6021	1019.06	0.1404	1.3698	0.3598	1.8644	WB						LVAIFTHL	43.9885	25.55	0.8267	0.0414	0.7005	0.0773
SIIIFTNT	8	45.0882	146.62	0.3051	0.5618	0.539	0.3918	WB						SSAIYMNL	45.0102	6.53	0.9462	0.0083	0.8265	0.0122
ATQVYTIL	8	50.9756	323.58	0.3901	0.3844	0.4658	0.7464	SB						VINSFVHV	51.0168	45.04	0.7362	0.0774	0.6481	0.1347
TILSFTNL	8	53.5513	4.85	0.9723	0.0043	0.8541	0.0092	SB						ATLVFHNL	52.1409	7.77	0.9583	0.0064	0.8105	0.0145
TALTYLNL	8	49.0032	8.53	0.9127	0.0161	0.8019	0.0165	SB						VVTHFIQA	42.9642	1486.3	0.1325	1.4545	0.3249	2.537
AVGNHVAKL	9	56.7737	1573.32	0.2093	0.8957	0.3197	2.6619	WB						ITGYFPSM	52.4321	50.9	0.6319	0.1223	0.6368	0.1536
SSDLFNNL	8	43.1413	68.33	0.6823	0.1003	0.6096	0.199	SB						AAYEFTTL	54.404	3.89	0.9901	0.0015	0.8745	0.0079
SMVDVVML	8	44.9241	734.72	0.2992	0.5773	0.3901	1.4286	WB						SINGAFGHL	53.008	225.92	0.3494	0.4601	0.499	0.549
FAPIYADL	8	46.5503	73.73	0.5012	0.2338	0.6025	0.215	SB						SSYIFSLV	47.0136	2.94	0.971	0.0045	0.9004	0.0063
SVSRFNSL	8	45.243	35.55	0.8427	0.0372	0.67	0.1047	SB						LSPVYTHV	43.042	53.14	0.6721	0.1048	0.6328	0.1605
SLIEFSTI	8	40.701	51.87	0.7069	0.0922	0.6351	0.1566	SB						STFSFTKV	47.0261	6.37	0.9648	0.0054	0.8289	0.0119
VITTYSLL	8	53.9126	19.91	0.742	0.0747	0.7235	0.0604	SB						TVVSFHQV	48.2188	131.77	0.6911	0.0974	0.5489	0.3588
VHLDLLSL	8	54.2557	699.54	0.2991	0.5776	0.3946	1.3774	WB						VTVTFNHV	48.1544	24.94	0.7767	0.0604	0.7027	0.0752
VAVPLIGKL	9	41.0767	345.47	0.5143	0.2222	0.4598	0.7933	SB						IVPLFTNL	49.725	7.47	0.9662	0.0052	0.8142	0.014
TEVSFTLN	8	51.3962	27343.7	0.0004	45.65	0.0558	53.6796	WB						SGLDYSYL	52.0362	20.75	0.8337	0.0392	0.7197	0.0627
STVEFTNL	8	51.3802	6.19	0.9723	0.0043	0.8315	0.0115	SB						HNVSFSNL	42.9669	28.61	0.8331	0.0393	0.69	0.0852
SSLEFSQI	8	51.3962	12.89	0.8952	0.0205	0.7637	0.0329	SB						ASYTYLSL	52.6366	3.34	0.987	0.002	0.8885	0.0071
SFVTTAER	8	62.1928	22221.2	0.0008	33.3774	0.075	39.059	WB						VGFIYGYV	48.9016	6.72	0.6955	0.0959	0.8239	0.0126
EKAVMVSF	8	69.349	28815	0.0025	19.6527	0.0509	58.3234	WB						FGYVYVGL	60.8885	6.63	0.9121	0.0162	0.8252	0.0124
SSVLYSRV	8	43.4239	14.48	0.8355	0.0388	0.753	0.0382	SB						TSLKLENL	40.7695	288.07	0.5031	0.2322	0.4766	0.6727
FALVFKSV	8	53.052	177.01	0.4226	0.3328	0.5216	0.4532	SB						VFIDLPTL	48.782	161.61	0.5751	0.1656	0.53	0.4233
VSPIILRL	8	45.9966	60.93	0.8548	0.0344	0.6202	0.1819	SB						GVLRFVNL	48.82	21.28	0.8704	0.0309	0.7174	0.0642
SGYSFTHI	8	48.8571	6.25	0.9634	0.0057	0.8306	0.0116	SB						VIVKFAQL	44.955	4.83	0.9822	0.0027	0.8544	0.0092
VEATFGVDESNAK	13	64.1599	31501.7	0.0001	71.5217	0.0427	67.19	WB						ISYRLPGL	40.8627	5.01	0.9648	0.0054	0.851	0.0094
ATMLFAEL	8	47.5362	6.03	0.9326	0.0107	0.8339	0.0112	SB						IALRYVAL	49.1229	6.36	0.9274	0.0122	0.829	0.0119
AAYGFRNI	8	44.8296	10.76	0.909	0.017	0.7804	0.0263	SB						ESPLFNNV	48.121	844.13	0.2954	0.5871	0.3772	1.5815
SMILFTSL	8	41.578	5.61	0.9495	0.0078	0.8405	0.0102	SB						VGPRYTNL	54.0776	12.49	0.932	0.0109	0.7666	0.0315
SIVPMVHL	8	49.0112	120.96	0.7491	0.0713	0.5568	0.3323	SB						ATRSFPQL	47.8343	75.16	0.7492	0.0712	0.6008	0.2192
LGKSPLPSL	9	44.958	5187.45	0.0882	2.1455	0.2094	7.4108	WB						ATRLMAQL	41.0171	621.03	0.2391	0.7721	0.4056	1.2618
ARIILVNI	8	40.5069	4199.54	0.0597	2.9408	0.2289	6.1145	WB						IGYAFVHL	49.0364	2.76	0.9911	0.0014	0.9062	0.0059
SVVVFQSF	8	40.8336	156.16	0.5955	0.1483	0.5332	0.412	SB						VVPEYVTL	48.8402	26.62	0.9245	0.013	0.6967	0.0806
GVFSFSRL	8	48.26	7.66	0.9358	0.0099	0.8118	0.0143	SB						ATQVYPKL	50.3855	160.8	0.6823	0.1003	0.5305	0.4216
SSIVFGRF	8	59.6247	27.3	0.7044	0.093	0.6944	0.0822	SB						VNRSFIAL	44.9557	10.95	0.8935	0.0211	0.7788	0.0268
KSFLFSAL	8	48.6013	2.65	0.9812	0.0029	0.9098	0.0057	SB						SGFRLLNL	61.1781	13.79	0.8899	0.0226	0.7575	0.036
NNYVYAGL	8	47.3699	7.03	0.8952	0.0205	0.8198	0.0132	SB						VGIEYILL	52.0196	11.8	0.9325	0.0108	0.7719	0.0292
NVYNYAGL	8	49.1006	9.74	0.8739	0.0301	0.7896	0.02	SB						SNVVFKLL	47.2652	17.71	0.874	0.0301	0.7344	0.0528
ATFPFAML	8	50.3973	4.1	0.9748	0.0039	0.8696	0.0082	SB						KTFSYAGF	56.0995	18.73	0.6599	0.1101	0.7292	0.0564
ATFLYAEV	8	41.0836	6.8	0.8931	0.0213	0.8228	0.0127	SB						SAPQYSRL	52.1705	19.55	0.9356	0.0099	0.7252	0.0592
ASFLYAEI	8	45.0214	5.03	0.9169	0.0151	0.8508	0.0094	SB						AFYTVAHL	44.6086	47.11	0.6999	0.0945	0.6439	0.1416
DVQLQESGPGLVK	13	55.3584	33511.8	0	88.4615	0.037	73.9685	WB						SNLLYVNV	53.3774	12.76	0.8378	0.0383	0.7646	0.0325
VISTFFTV	8	42.9499	65.71	0.5254	0.2124	0.6132	0.1932	SB						TNFLVSQL	44.8416	31.08	0.8429	0.0371	0.6824	0.0906
VMVQPINL	8	45.2136	147.61	0.5608	0.1782	0.5384	0.3939	SB						HGYTFANL	52.0275	3.99	0.9762	0.0037	0.872	0.0081
ITIPMIPL	8	40.7746	65.06	0.5498	0.1894	0.6141	0.1917	SB						VVYDITNV	42.9634	28.02	0.8732	0.0303	0.6919	0.0839
LVAIFTHL	8	43.9885	25.55	0.8267	0.0414	0.7005	0.0773	SB						ATLEFTQL	52.2571	14.44	0.9418	0.009	0.7532	0.0381
SSAIYMNL	8	45.0102	6.53	0.9462	0.0083	0.8265	0.0122	SB						VADKFTEL	45.5814	195.76	0.661	0.1096	0.5123	0.4863
ATVPPYLGP	9	51.9435	19729.1	0.0047	14.3669	0.0859	32.9338	WB						STFSPALSL	42.9518	125.49	0.5887	0.1539	0.5534	0.3437
VINSFVHV	8	51.0168	45.04	0.7362	0.0774	0.6481	0.1347	SB						RVTSFAEL	49.0124	62.56	0.6531	0.1131	0.6177	0.1858
ATLVFHNL	8	52.1409	7.77	0.9583	0.0064	0.8105	0.0145	SB						SAYEVIKL	41.2241	51.59	0.8966	0.02	0.6355	0.1558
VVTHFIQA	8	42.9642	1486.3	0.1325	1.4545	0.3249	2.537	WB						HGYIFSSL	41.0092	10.26	0.9375	0.0096	0.7849	0.0243
ITGYFPSM	8	52.4321	50.9	0.6319	0.1223	0.6368	0.1536	SB						LQQTYSAL	51.777	282.03	0.2757	0.6429	0.4785	0.6615
AAYEFTTL	8	54.404	3.89	0.9901	0.0015	0.8745	0.0079	SB						VMFTPLTV	40.8174	85.1	0.5165	0.2203	0.5893	0.2461
SINGAFGHL	9	53.008	225.92	0.3494	0.4601	0.499	0.549	SB						TFIDLTTL	42.9666	537.48	0.3613	0.4369	0.4189	1.1273
SSYIFSLV	8	47.0136	2.94	0.971	0.0045	0.9004	0.0063	SB						TMQSTVQL	63.9927	2088.03	0.1304	1.4784	0.2935	3.3489
LSPVYTHV	8	43.042	53.14	0.6721	0.1048	0.6328	0.1605	SB						SGVEYTRL	45.12	24.54	0.9127	0.0161	0.7042	0.0737
STFSFTKV	8	47.0261	6.37	0.9648	0.0054	0.8289	0.0119	SB						VLFDFGNL	43.931	5.2	0.9221	0.0137	0.8476	0.0096
TVVSFHQV	8	48.2188	131.77	0.6911	0.0974	0.5489	0.3588	SB						VQFVFDAV	40.8896	39.01	0.5188	0.2182	0.6614	0.1156
VTVTFNHV	8	48.1544	24.94	0.7767	0.0604	0.7027	0.0752	SB						LSFPYGQL	45.1184	5.97	0.9384	0.0095	0.8348	0.011
IVPLFTNL	8	49.725	7.47	0.9662	0.0052	0.8142	0.014	SB						SSLRFTTI	45.0153	11.73	0.8857	0.0242	0.7724	0.029
SGLDYSYL	8	52.0362	20.75	0.8337	0.0392	0.7197	0.0627	SB						QVFIFTGL	51.4135	6.46	0.9392	0.0094	0.8275	0.0121
HNVSFSNL	8	42.9669	28.61	0.8331	0.0393	0.69	0.0852	SB						AAYIFGLGL	47.1661	20.4	0.7723	0.0621	0.7213	0.0618
ASYTYLSL	8	52.6366	3.34	0.987	0.002	0.8885	0.0071	SB						VRVFFSGL	48.0895	51.03	0.448	0.294	0.6366	0.154
VGFIYGYV	8	48.9016	6.72	0.6955	0.0959	0.8239	0.0126	SB						SSLEFTEL	53.0319	7.23	0.9628	0.0057	0.8172	0.0136
FGYVYVGL	8	60.8885	6.63	0.9121	0.0162	0.8252	0.0124	SB						SAPEYVFL	52.3715	26	0.8809	0.0265	0.6989	0.0788
TSLKLENL	8	40.7695	288.07	0.5031	0.2322	0.4766	0.6727	SB						ISDLFPSF	44.9872	480.5	0.3855	0.3917	0.4293	1.0299
VFIDLPTL	8	48.782	161.61	0.5751	0.1656	0.53	0.4233	SB						EIITFTAM	46.5128	527.63	0.3111	0.5462	0.4207	1.1095
GVLRFVNL	8	48.82	21.28	0.8704	0.0309	0.7174	0.0642	SB						RAFAFTNV	51.8155	5.9	0.9263	0.0125	0.8359	0.0109
VIVKFAQL	8	44.955	4.83	0.9822	0.0027	0.8544	0.0092	SB						VAFDFTKV	51.1281	8.24	0.9512	0.0075	0.8051	0.0156
ISYRLPGL	8	40.8627	5.01	0.9648	0.0054	0.851	0.0094	SB						SSFVFLNL	53.3711	2.12	0.9939	0.0009	0.9304	0.0044
IALRYVAL	8	49.1229	6.36	0.9274	0.0122	0.829	0.0119	SB						RIYGFTAV	51.9488	18.27	0.825	0.042	0.7315	0.0548
ESPLFNNV	8	48.121	844.13	0.2954	0.5871	0.3772	1.5815	WB						SGFVFTRL	45.1489	3.16	0.9911	0.0014	0.8938	0.0067
TITTFEHA	8	51.0992	7049.84	0.017	6.9269	0.1811	9.9895	WB						ASYLFRGL	50.2327	2.96	0.984	0.0025	0.8998	0.0063
VGPRYTNL	8	54.0776	12.49	0.932	0.0109	0.7666	0.0315	SB						TNISFTNM	47.8749	10.67	0.9151	0.0155	0.7812	0.026
ATRSFPQL	8	47.8343	75.16	0.7492	0.0712	0.6008	0.2192	SB						FSPSFTEL	42.9468	56.87	0.8104	0.0477	0.6265	0.1713
ATRLMAQL	8	41.0171	621.03	0.2391	0.7721	0.4056	1.2618	WB						VAPPYPHF	43.7197	98.87	0.8053	0.0497	0.5754	0.2788
IGYAFVHL	8	49.0364	2.76	0.9911	0.0014	0.9062	0.0059	SB						IIYPPPEV	40.6358	358.84	0.6107	0.1366	0.4563	0.8204
VVPEYVTL	8	48.8402	26.62	0.9245	0.013	0.6967	0.0806	SB						SSMVLTKM	45.8849	173.31	0.5457	0.1935	0.5236	0.4462
ATQVYPKL	8	50.3855	160.8	0.6823	0.1003	0.5305	0.4216	SB						AVQTFSYL	53.7045	26.59	0.796	0.0532	0.6968	0.0806
VNRSFIAL	8	44.9557	10.95	0.8935	0.0211	0.7788	0.0268	SB						AIHNFVEV	45.8648	205.19	0.5151	0.2215	0.5079	0.5026
SGFRLLNL	8	61.1781	13.79	0.8899	0.0226	0.7575	0.036	SB						SAFSFRTL	51.0427	3.76	0.987	0.002	0.8775	0.0077
VGIEYILL	8	52.0196	11.8	0.9325	0.0108	0.7719	0.0292	SB						VAEFTSYI	56.1385	770.75	0.1466	1.3123	0.3856	1.4796
SNVVFKLL	8	47.2652	17.71	0.874	0.0301	0.7344	0.0528	SB						YSAIYSLL	42.967	28.35	0.6817	0.1006	0.6909	0.0846
KTFSYAGF	8	56.0995	18.73	0.6599	0.1101	0.7292	0.0564	SB						IVLEMVPL	40.58	59.94	0.4738	0.2615	0.6217	0.1794
SAPQYSRL	8	52.1705	19.55	0.9356	0.0099	0.7252	0.0592	SB						TIIVFHSL	52.2546	9.54	0.9603	0.0061	0.7916	0.0194
AFYTVAHL	8	44.6086	47.11	0.6999	0.0945	0.6439	0.1416	SB						KMVVLLNL	52.9961	197.12	0.3373	0.4836	0.5117	0.4886
SNLLYVNV	8	53.3774	12.76	0.8378	0.0383	0.7646	0.0325	SB						SSYAYSRP	49.1235	464.62	0.115	1.6672	0.4324	1.0017
TNFLVSQL	8	44.8416	31.08	0.8429	0.0371	0.6824	0.0906	SB						STRVYASM	48.0465	46.26	0.6036	0.1421	0.6456	0.1388
QSLVFKLS	8	45.0303	4720.61	0.0088	10.211	0.2181	6.7955	WB						RGVDYHAL	42.9622	345.77	0.4937	0.2405	0.4597	0.7939
HGYTFANL	8	52.0275	3.99	0.9762	0.0037	0.872	0.0081	SB						VNVPFANGI	40.8446	96.17	0.5245	0.2132	0.578	0.2727
VVYDITNV	8	42.9634	28.02	0.8732	0.0303	0.6919	0.0839	SB						VGITYQHI	46.5637	37.32	0.7794	0.0594	0.6655	0.1104
ATLEFTQL	8	52.2571	14.44	0.9418	0.009	0.7532	0.0381	SB						VFVEPVQL	41.0209	764.4	0.4071	0.3574	0.3864	1.4708
VADKFTEL	8	45.5814	195.76	0.661	0.1096	0.5123	0.4863	SB						IIQEFPAL	50.4063	27.75	0.8449	0.0367	0.6929	0.0833
STFSPALSL	9	42.9518	125.49	0.5887	0.1539	0.5534	0.3437	SB						RAPDFVLL	44.8729	60.6	0.8244	0.0423	0.6207	0.1811
RVTSFAEL	8	49.0124	62.56	0.6531	0.1131	0.6177	0.1858	SB						TIPLFVQL	40.577	35.42	0.8919	0.0218	0.6703	0.1043
SAYEVIKL	8	41.2241	51.59	0.8966	0.02	0.6355	0.1558	SB						VSRLFPVL	52.997	18.8	0.7868	0.0566	0.7288	0.0567
HGYIFSSL	8	41.0092	10.26	0.9375	0.0096	0.7849	0.0243	SB						ASYEFTTL	53.5869	2.8	0.9949	0.0008	0.9048	0.006
LQQTYSAL	8	51.777	282.03	0.2757	0.6429	0.4785	0.6615	WB						INYQPPTV	42.9549	107.64	0.7199	0.0863	0.5676	0.2974
VMFTPLTV	8	40.8174	85.1	0.5165	0.2203	0.5893	0.2461	SB						VGYRQPLV	42.9478	137.01	0.5033	0.232	0.5453	0.3708
TFIDLTTL	8	42.9666	537.48	0.3613	0.4369	0.4189	1.1273	SB						VSPLFQKL	50.6924	12.04	0.9723	0.0043	0.77	0.0299
SYVKGEKL	8	42.9667	5282.27	0.0687	2.6149	0.2077	7.5365	WB						GVVRFLQL	40.9981	168.13	0.6503	0.1143	0.5264	0.4363
TMQSTVQL	8	63.9927	2088.03	0.1304	1.4784	0.2935	3.3489	WB						TNINFPNL	48.9833	7.74	0.9589	0.0063	0.8108	0.0145
SGVEYTRL	8	45.12	24.54	0.9127	0.0161	0.7042	0.0737	SB						SIVSYNHL	45.5465	12.67	0.9243	0.0131	0.7653	0.0322
VLFDFGNL	8	43.931	5.2	0.9221	0.0137	0.8476	0.0096	SB						IAFGFHQL	45.2529	4.11	0.9884	0.0018	0.8693	0.0083
VQFVFDAV	8	40.8896	39.01	0.5188	0.2182	0.6614	0.1156	SB						VSPRLTFL	44.6627	81.26	0.6767	0.1028	0.5936	0.2361
LSFPYGQL	8	45.1184	5.97	0.9384	0.0095	0.8348	0.011	SB						AVIKFLEL	46.0911	19.99	0.9347	0.0101	0.7231	0.0606
SSLRFTTI	8	45.0153	11.73	0.8857	0.0242	0.7724	0.029	SB						ASYVYLSM	52.9067	6.17	0.9528	0.0073	0.8319	0.0115
QVFIFTGL	8	51.4135	6.46	0.9392	0.0094	0.8275	0.0121	SB						EAPSFLNGV	53.1792	2001	0.1496	1.2853	0.2975	3.2338
AAYIFGLGL	9	47.1661	20.4	0.7723	0.0621	0.7213	0.0618	SB						VLEEFPSL	40.6162	445.92	0.3794	0.4015	0.4362	0.973
VRVFFSGL	8	48.0895	51.03	0.448	0.294	0.6366	0.154	SB						LSPQFTQL	52.348	28.49	0.906	0.0177	0.6904	0.0849
SSLEFTEL	8	53.0319	7.23	0.9628	0.0057	0.8172	0.0136	SB						VNVDIINF	52.8447	1238.12	0.2728	0.6512	0.3418	2.1935
SAPEYVFL	8	52.3715	26	0.8809	0.0265	0.6989	0.0788	SB						VGPRYTQL	51.9172	21.07	0.9252	0.0128	0.7183	0.0636
ISDLFPSF	8	44.9872	480.5	0.3855	0.3917	0.4293	1.0299	SB						VGPTLKATF	42.9627	507.38	0.412	0.3497	0.4243	1.0755
EIITFTAM	8	46.5128	527.63	0.3111	0.5462	0.4207	1.1095	WB						LSMKTLQL	45.3868	603.23	0.3157	0.5342	0.4083	1.2357
RAFAFTNV	8	51.8155	5.9	0.9263	0.0125	0.8359	0.0109	SB						SALRFLNL	48.9311	4.03	0.9767	0.0036	0.8712	0.0081
SFTKMAEI	8	41.0153	2113.13	0.0624	2.8441	0.2924	3.3812	WB						FNIRVATI	44.5468	429.81	0.3121	0.5436	0.4396	0.9476
ASYYAPVR	8	64.0953	7073.91	0.0115	8.7752	0.1807	10.0249	WB						ISARFVQL	49.8691	6.11	0.9672	0.0051	0.8328	0.0113
VAFDFTKV	8	51.1281	8.24	0.9512	0.0075	0.8051	0.0156	SB						VLIEFSLL	45.3351	10.68	0.8905	0.0223	0.7811	0.026
SSFVFLNL	8	53.3711	2.12	0.9939	0.0009	0.9304	0.0044	SB						AAYSFYNV	52.7598	3.54	0.9699	0.0046	0.8831	0.0074
RIYGFTAV	8	51.9488	18.27	0.825	0.042	0.7315	0.0548	SB						QNAVYINL	40.778	62.13	0.7042	0.0931	0.6184	0.1848
SGFVFTRL	8	45.1489	3.16	0.9911	0.0014	0.8938	0.0067	SB						IIPMFSNL	48.647	6.53	0.9349	0.0101	0.8265	0.0122
ASYLFRGL	8	50.2327	2.96	0.984	0.0025	0.8998	0.0063	SB						IAVSFREL	50.824	16.06	0.886	0.0241	0.7434	0.0454
TNISFTNM	8	47.8749	10.67	0.9151	0.0155	0.7812	0.026	SB						TITSFPRL	45.0044	37.92	0.8293	0.0404	0.664	0.1123
FSPSFTEL	8	42.9468	56.87	0.8104	0.0477	0.6265	0.1713	SB						TIILFTKV	50.5034	43.16	0.8003	0.0516	0.652	0.1281
SNRSYVTT	8	42.9479	1316.64	0.0833	2.2527	0.3361	2.3071	WB						ASITFEHM	42.968	31.31	0.8119	0.0471	0.6817	0.0914
VAPPYPHF	8	43.7197	98.87	0.8053	0.0497	0.5754	0.2788	SB						NSLERMGL	48.7838	2597.71	0.1212	1.5923	0.2733	4.012
IIYPPPEV	8	40.6358	358.84	0.6107	0.1366	0.4563	0.8204	SB						TNYQLPSL	48.2107	21.09	0.9084	0.0171	0.7182	0.0637
SSMVLTKM	8	45.8849	173.31	0.5457	0.1935	0.5236	0.4462	SB						IISTFQNL	44.3604	12.67	0.9108	0.0165	0.7653	0.0321
AVQTFSYL	8	53.7045	26.59	0.796	0.0532	0.6968	0.0806	SB						VNVRFSTI	49.6861	10.68	0.8928	0.0214	0.7811	0.026
AIHNFVEV	8	45.8648	205.19	0.5151	0.2215	0.5079	0.5026	SB						SQIVFRSV	50.1601	52.37	0.7261	0.0828	0.6342	0.1582
SAFSFRTL	8	51.0427	3.76	0.987	0.002	0.8775	0.0077	SB						SNYKVVLL	45.856	17.24	0.9258	0.0126	0.7369	0.0511
VAEFTSYI	8	56.1385	770.75	0.1466	1.3123	0.3856	1.4796	WB						HSPSFTNF	65.2734	327.6	0.5174	0.2195	0.4647	0.7553
YSAIYSLL	8	42.967	28.35	0.6817	0.1006	0.6909	0.0846	SB						TITDFINI	41.0258	357.68	0.3655	0.4286	0.4566	0.8181
KVLELDNV	8	41.0111	4265.3	0.0549	3.1385	0.2275	6.1999	WB						SLLSFEKI	42.9656	446.44	0.3025	0.5688	0.4361	0.9738
IVLEMVPL	8	40.58	59.94	0.4738	0.2615	0.6217	0.1794	SB						SLVTFRTL	47.0606	22.06	0.8509	0.0353	0.7141	0.0663
TIIVFHSL	8	52.2546	9.54	0.9603	0.0061	0.7916	0.0194	SB						KGPVYLLF	45.8669	339.96	0.4074	0.357	0.4613	0.7818
KMVVLLNL	8	52.9961	197.12	0.3373	0.4836	0.5117	0.4886	SB						AAFTYDHI	42.9664	57.07	0.555	0.1841	0.6262	0.1719
SSYAYSRP	8	49.1235	464.62	0.115	1.6672	0.4324	1.0017	WB						RGPTYVNM	53.9478	61.69	0.7613	0.0663	0.619	0.1837
STRVYASM	8	48.0465	46.26	0.6036	0.1421	0.6456	0.1388	SB						SAVEFRQT	52.1851	2008.05	0.1238	1.5599	0.2971	3.2433
RGVDYHAL	8	42.9622	345.77	0.4937	0.2405	0.4597	0.7939	SB						SSLHFSFL	41.1796	4.72	0.9305	0.0113	0.8566	0.0091
QLENVSAGL	9	41.2584	18047.9	0.0029	18.2468	0.0942	29.174	WB						LSYSFAHL	56.5063	1.98	0.9923	0.0012	0.9369	0.004
VNVPFANGI	9	40.8446	96.17	0.5245	0.2132	0.578	0.2727	SB						VNVDYSKL	51.1374	18.37	0.9145	0.0157	0.731	0.0552
VGITYQHI	8	46.5637	37.32	0.7794	0.0594	0.6655	0.1104	SB						SNLQYSLL	50.1887	7.36	0.9281	0.012	0.8156	0.0138
VFVEPVQL	8	41.0209	764.4	0.4071	0.3574	0.3864	1.4708	SB						TNVQYSNL	48.8813	11.41	0.9125	0.0161	0.775	0.0282
IIQEFPAL	8	50.4063	27.75	0.8449	0.0367	0.6929	0.0833	SB						VGVGLYPSM	40.7022	96.55	0.5723	0.1679	0.5776	0.2736
RAPDFVLL	8	44.8729	60.6	0.8244	0.0423	0.6207	0.1811	SB						IAVQFVDM	45.8828	128.66	0.4558	0.2843	0.5511	0.3514
TKLQTINL	8	53.5666	5264.52	0.0649	2.7532	0.208	7.5102	WB						LAYLFAQL	51.6254	2.86	0.9813	0.0029	0.903	0.0061
TIPLFVQL	8	40.577	35.42	0.8919	0.0218	0.6703	0.1043	SB						VFYAVKVL	48.1649	169.11	0.465	0.2726	0.5258	0.4382
VSRLFPVL	8	52.997	18.8	0.7868	0.0566	0.7288	0.0567	SB						TAPEYVFL	52.3754	51.95	0.7932	0.0542	0.6349	0.1569
ASYEFTTL	8	53.5869	2.8	0.9949	0.0008	0.9048	0.006	SB						AIFNFQSL	49.4563	4.74	0.9825	0.0027	0.8562	0.0091
INYQPPTV	8	42.9549	107.64	0.7199	0.0863	0.5676	0.2974	SB						VAYGFRNI	51.8473	5.35	0.9546	0.007	0.845	0.0098
VGYRQPLV	8	42.9478	137.01	0.5033	0.232	0.5453	0.3708	SB						SVYPFTLI	45.0538	5.2	0.9786	0.0033	0.8475	0.0096
VSPLFQKL	8	50.6924	12.04	0.9723	0.0043	0.77	0.0299	SB						KNFAFTLV	40.933	8.55	0.8626	0.0327	0.8017	0.0166
GVVRFLQL	8	40.9981	168.13	0.6503	0.1143	0.5264	0.4363	SB						ATYPYQVV	49.1513	41.93	0.8323	0.0395	0.6547	0.124
TNINFPNL	8	48.9833	7.74	0.9589	0.0063	0.8108	0.0145	SB						AFEFINSL	49.0668	231.15	0.4926	0.2414	0.4969	0.56
SIVSYNHL	8	45.5465	12.67	0.9243	0.0131	0.7653	0.0322	SB						RGYEFLGV	48.8675	29.83	0.7584	0.0674	0.6862	0.0878
IAFGFHQL	8	45.2529	4.11	0.9884	0.0018	0.8693	0.0083	SB						IHFISPNI	64.2174	177.39	0.3451	0.4684	0.5214	0.4539
VSPRLTFL	8	44.6627	81.26	0.6767	0.1028	0.5936	0.2361	SB						SAYLFVKL	52.3897	3.02	0.9939	0.0009	0.8979	0.0065
AVIKFLEL	8	46.0911	19.99	0.9347	0.0101	0.7231	0.0606	SB						VKYLFTGL	42.4945	10.16	0.8587	0.0336	0.7857	0.0235
ASYVYLSM	8	52.9067	6.17	0.9528	0.0073	0.8319	0.0115	SB						IDYSFPSL	46.4801	28.61	0.8072	0.0489	0.69	0.0852
EAPSFLNGV	9	53.1792	2001	0.1496	1.2853	0.2975	3.2338	WB						SPFSYKNV	54.0637	407.1	0.3308	0.4962	0.4446	0.9101
VLEEFPSL	8	40.6162	445.92	0.3794	0.4015	0.4362	0.973	SB						VAFNYKTV	41.974	12.94	0.8907	0.0222	0.7633	0.0331
LSPQFTQL	8	52.348	28.49	0.906	0.0177	0.6904	0.0849	SB						SIYIFTVV	53.0284	7.46	0.9257	0.0126	0.8143	0.014
VNVDIINF	8	52.8447	1238.12	0.2728	0.6512	0.3418	2.1935	WB						SSYTFPQI	53.6453	4.09	0.9841	0.0025	0.8698	0.0082
VGPRYTQL	8	51.9172	21.07	0.9252	0.0128	0.7183	0.0636	SB						VNHDFTPL	42.9658	8.21	0.9046	0.018	0.8054	0.0155
PHVPGVTNL	9	41.7209	17508.5	0.0098	9.5856	0.097	28.0279	WB						TAYEFAKL	52.693	3.19	0.992	0.0012	0.8929	0.0068
VGPTLKATF	9	42.9627	507.38	0.412	0.3497	0.4243	1.0755	SB						TAPHYQLL	42.9551	58.42	0.8182	0.0447	0.624	0.1756
LSMKTLQL	8	45.3868	603.23	0.3157	0.5342	0.4083	1.2357	WB						VAHTFVIGV	45.8755	71.1	0.5643	0.1747	0.6059	0.2072
SALRFLNL	8	48.9311	4.03	0.9767	0.0036	0.8712	0.0081	SB						SIYETPSM	43.5361	105.21	0.7529	0.0695	0.5697	0.2924
FNIRVATI	8	44.5468	429.81	0.3121	0.5436	0.4396	0.9476	WB						SDYVYPSL	44.3212	78.86	0.6678	0.1067	0.5963	0.2296
ISARFVQL	8	49.8691	6.11	0.9672	0.0051	0.8328	0.0113	SB						VAFAFELM	38.0993	7.04	0.8846	0.0246	0.8196	0.0132
ILSRFALN	8	50.5616	8307.53	0.0011	29	0.1659	11.8534	WB						TTFVFTEV	48.1631	9.13	0.902	0.0187	0.7956	0.0183
VLIEFSLL	8	45.3351	10.68	0.8905	0.0223	0.7811	0.026	SB						VSYVFTEV	41.8517	2.8	0.9836	0.0025	0.9047	0.006
AAYSFYNV	8	52.7598	3.54	0.9699	0.0046	0.8831	0.0074	SB						LGYSYVEL	53.1904	6.19	0.9498	0.0077	0.8315	0.0115
QNAVYINL	8	40.778	62.13	0.7042	0.0931	0.6184	0.1848	SB						AVYTFETL	53.2002	4.68	0.9853	0.0023	0.8573	0.009
IIPMFSNL	8	48.647	6.53	0.9349	0.0101	0.8265	0.0122	SB						VNFVHTNL	52.2099	3.41	0.9858	0.0022	0.8866	0.0072
IAVSFREL	8	50.824	16.06	0.886	0.0241	0.7434	0.0454	SB						TIIIFHSL	51.2249	10.75	0.9546	0.007	0.7805	0.0262
TITSFPRL	8	45.0044	37.92	0.8293	0.0404	0.664	0.1123	SB						IGPRFKLL	55.2937	29.84	0.8456	0.0365	0.6862	0.0878
TIILFTKV	8	50.5034	43.16	0.8003	0.0516	0.652	0.1281	SB						SGYDFSRL	47.8707	3.82	0.9913	0.0013	0.8762	0.0078
ASITFEHM	8	42.968	31.31	0.8119	0.0471	0.6817	0.0914	SB						SAYLYQSL	45.4458	3.52	0.9881	0.0018	0.8836	0.0074
NSLERMGL	8	48.7838	2597.71	0.1212	1.5923	0.2733	4.012	WB						STFIYNSI	58.3167	7.93	0.9185	0.0146	0.8087	0.0148
TNYQLPSL	8	48.2107	21.09	0.9084	0.0171	0.7182	0.0637	SB						SWIAVQEL	48.136	627.95	0.3728	0.4144	0.4046	1.2718
IISTFQNL	8	44.3604	12.67	0.9108	0.0165	0.7653	0.0321	SB						VAPTFSPNL	42.9642	7.46	0.9654	0.0053	0.8142	0.014
VNVRFSTI	8	49.6861	10.68	0.8928	0.0214	0.7811	0.026	SB						VFYGVFTL	48.4452	62.54	0.6103	0.1369	0.6178	0.1858
SQIVFRSV	8	50.1601	52.37	0.7261	0.0828	0.6342	0.1582	SB						VAVNLIMGL	49.4336	129.32	0.4398	0.3055	0.5506	0.353
SNYKVVLL	8	45.856	17.24	0.9258	0.0126	0.7369	0.0511	SB						AGYMYTQL	51.3571	4.86	0.9766	0.0036	0.8539	0.0092
HSPSFTNF	8	65.2734	327.6	0.5174	0.2195	0.4647	0.7553	SB						TQYTFSSI	48.6164	10.49	0.8916	0.0219	0.7827	0.0255
LGAMRMLL	8	44.9941	2260.89	0.0341	4.401	0.2862	3.5743	WB						TSGHFERL	44.9266	241.16	0.4937	0.2404	0.493	0.5804
TITDFINI	8	41.0258	357.68	0.3655	0.4286	0.4566	0.8181	SB						ANFPRATGL	40.956	29.24	0.8351	0.0389	0.688	0.0866
SLLSFEKI	8	42.9656	446.44	0.3025	0.5688	0.4361	0.9738	WB						SLFAVLPSL	52.8073	158.06	0.4637	0.2743	0.5321	0.416
SLVTFRTL	8	47.0606	22.06	0.8509	0.0353	0.7141	0.0663	SB						VIVRFLTV	50.3946	19.64	0.8434	0.037	0.7248	0.0595
KGPVYLLF	8	45.8669	339.96	0.4074	0.357	0.4613	0.7818	SB						SHHSMVSM	42.9666	1959.92	0.1152	1.6649	0.2994	3.1777
AAFTYDHI	8	42.9664	57.07	0.555	0.1841	0.6262	0.1719	SB						TVIGAFLNL	45.0041	40.08	0.7014	0.094	0.6589	0.1187
RGPTYVNM	8	53.9478	61.69	0.7613	0.0663	0.619	0.1837	SB						ALLQYINL	45.1512	70.49	0.6469	0.1158	0.6067	0.2053
SAVEFRQT	8	52.1851	2008.05	0.1238	1.5599	0.2971	3.2433	WB						STFVYNSM	49.5925	6	0.944	0.0086	0.8345	0.0111
VSDFGGRSL	9	40.9799	5272.73	0.0554	3.1192	0.2079	7.5223	WB						SSPQFVGNL	43.3954	11.93	0.9098	0.0168	0.7709	0.0296
SSLHFSFL	8	41.1796	4.72	0.9305	0.0113	0.8566	0.0091	SB						SGYKFFSL	48.816	3.94	0.9825	0.0027	0.8733	0.008
LSYSFAHL	8	56.5063	1.98	0.9923	0.0012	0.9369	0.004	SB						AGLEVYPSI	48.9394	574.97	0.3457	0.4672	0.4127	1.1921
VNVDYSKL	8	51.1374	18.37	0.9145	0.0157	0.731	0.0552	SB						RAPSYIEI	43.9297	270.11	0.5148	0.2218	0.4825	0.6386
SNLQYSLL	8	50.1887	7.36	0.9281	0.012	0.8156	0.0138	SB						AQIRFSNI	42.9542	35.88	0.693	0.0967	0.6691	0.1058
TNVQYSNL	8	48.8813	11.41	0.9125	0.0161	0.775	0.0282	SB						IIITFNDL	49.3832	16.13	0.7995	0.0519	0.743	0.0457
VGVGLYPSM	9	40.7022	96.55	0.5723	0.1679	0.5776	0.2736	SB						VITEFARI	42.4385	33.12	0.7186	0.0871	0.6765	0.097
IAVQFVDM	8	45.8828	128.66	0.4558	0.2843	0.5511	0.3514	SB						INLSFNKL	40.8266	8.16	0.9478	0.0081	0.806	0.0154
FIRGGNKM	8	56.244	18065.2	0.0069	11.6603	0.0941	29.2123	WB						KVITFIDL	47.9815	42.88	0.7413	0.075	0.6526	0.1271
LAYLFAQL	8	51.6254	2.86	0.9813	0.0029	0.903	0.0061	SB						ISLLYNLL	48.0237	5.02	0.9137	0.0159	0.8509	0.0094
VFYAVKVL	8	48.1649	169.11	0.465	0.2726	0.5258	0.4382	SB						SIFEFVHA	45.9368	27.83	0.7221	0.0851	0.6926	0.0834
PRVLLLDL	8	49.6956	24474.9	0.0012	27.871	0.066	45.2293	WB						GSLVCFPNL	42.9592	162.8	0.1835	1.0438	0.5293	0.4257
TAPEYVFL	8	52.3754	51.95	0.7932	0.0542	0.6349	0.1569	SB						IGYIHSLM	42.9647	11.6	0.8399	0.0378	0.7735	0.0287
AIFNFQSL	8	49.4563	4.74	0.9825	0.0027	0.8562	0.0091	SB						TQQLYPSL	47.4042	212.97	0.5215	0.2158	0.5045	0.5205
VAYGFRNI	8	51.8473	5.35	0.9546	0.007	0.845	0.0098	SB						VGINYREV	40.9635	74.64	0.6195	0.1298	0.6014	0.2177
SVYPFTLI	8	45.0538	5.2	0.9786	0.0033	0.8475	0.0096	SB						AVDRFQTL	42.9502	365.56	0.5952	0.1485	0.4546	0.8336
KNFAFTLV	8	40.933	8.55	0.8626	0.0327	0.8017	0.0166	SB						GIMRFVNI	43.2917	73.49	0.5137	0.2227	0.6028	0.2144
ATYPYQVV	8	49.1513	41.93	0.8323	0.0395	0.6547	0.124	SB						SVIKFENL	51.3636	7.15	0.979	0.0032	0.8181	0.0134
AFEFINSL	8	49.0668	231.15	0.4926	0.2414	0.4969	0.56	SB						VVYVLPML	40.9204	9.77	0.9328	0.0107	0.7893	0.0202
RGYEFLGV	8	48.8675	29.83	0.7584	0.0674	0.6862	0.0878	SB						SNLKYILV	50.5489	37.89	0.7474	0.0721	0.6641	0.1122
IHFISPNI	8	64.2174	177.39	0.3451	0.4684	0.5214	0.4539	SB						SAFEHTQM	42.9595	53.47	0.8318	0.0396	0.6322	0.1615
SAYLFVKL	8	52.3897	3.02	0.9939	0.0009	0.8979	0.0065	SB						AIPEFMNL	40.8671	29.02	0.8886	0.0231	0.6887	0.0861
VKYLFTGL	8	42.4945	10.16	0.8587	0.0336	0.7857	0.0235	SB						STWVFPTL	52.5643	6.14	0.9457	0.0084	0.8323	0.0114
IDYSFPSL	8	46.4801	28.61	0.8072	0.0489	0.69	0.0852	SB						VGWKYQAV	42.9673	27.15	0.754	0.0691	0.6949	0.0819
SPFSYKNV	8	54.0637	407.1	0.3308	0.4962	0.4446	0.9101	SB						KVVEFSEL	44.9612	22.64	0.9009	0.0189	0.7117	0.0678
VAFNYKTV	8	41.974	12.94	0.8907	0.0222	0.7633	0.0331	SB						IILKYIGM	45.0416	21.11	0.7975	0.0526	0.7181	0.0638
SIYIFTVV	8	53.0284	7.46	0.9257	0.0126	0.8143	0.014	SB						SSYIYGYV	42.9527	4.16	0.8894	0.0228	0.8682	0.0083
SSYTFPQI	8	53.6453	4.09	0.9841	0.0025	0.8698	0.0082	SB						ISVSFYHV	50.9685	7.51	0.8761	0.0291	0.8137	0.0141
VNHDFTPL	8	42.9658	8.21	0.9046	0.018	0.8054	0.0155	SB						VSYLFSHV	49.1297	2.13	0.9918	0.0013	0.93	0.0044
TAYEFAKL	8	52.693	3.19	0.992	0.0012	0.8929	0.0068	SB						AVFTWTNL	49.1047	9.53	0.9162	0.0152	0.7916	0.0194
TAPHYQLL	8	42.9551	58.42	0.8182	0.0447	0.624	0.1756	SB						TSVRFTQL	51.6181	9.5	0.9565	0.0067	0.7919	0.0193
VAHTFVIGV	9	45.8755	71.1	0.5643	0.1747	0.6059	0.2072	SB						IAFIFNNL	54.1624	2.5	0.9895	0.0016	0.9152	0.0054
SIYETPSM	8	43.5361	105.21	0.7529	0.0695	0.5697	0.2924	SB						KVLVFSQM	40.8998	25.03	0.8296	0.0402	0.7024	0.0755
SDYVYPSL	8	44.3212	78.86	0.6678	0.1067	0.5963	0.2296	SB						SNFTFSHL	42.9876	2.52	0.9928	0.0011	0.9147	0.0054
VAFAFELM	8	38.0993	7.04	0.8846	0.0246	0.8196	0.0132	SB						AMVEFVKL	45.0788	31.79	0.8546	0.0345	0.6803	0.0929
TTFVFTEV	8	48.1631	9.13	0.902	0.0187	0.7956	0.0183	SB						IFFIVSQV	45.0484	180.17	0.405	0.3606	0.52	0.459
VSYVFTEV	8	41.8517	2.8	0.9836	0.0025	0.9047	0.006	SB						SAFIFRVL	44.3139	6.5	0.9408	0.0091	0.8271	0.0121
LGYSYVEL	8	53.1904	6.19	0.9498	0.0077	0.8315	0.0115	SB						HIYSFSSL	42.9608	6.24	0.9671	0.0051	0.8308	0.0116
AVYTFETL	8	53.2002	4.68	0.9853	0.0023	0.8573	0.009	SB						VSVYYSHV	49.0948	7.26	0.8566	0.034	0.8168	0.0136
VNFVHTNL	8	52.2099	3.41	0.9858	0.0022	0.8866	0.0072	SB						RTFSWASV	45.1078	63.16	0.4579	0.2815	0.6168	0.1872
TIIIFHSL	8	51.2249	10.75	0.9546	0.007	0.7805	0.0262	SB						NVFTFVNL	49.0573	5.79	0.9661	0.0052	0.8377	0.0106
IGPRFKLL	8	55.2937	29.84	0.8456	0.0365	0.6862	0.0878	SB						ISLYFPTL	52.9885	3.91	0.9749	0.0039	0.8739	0.008
SGYDFSRL	8	47.8707	3.82	0.9913	0.0013	0.8762	0.0078	SB						AQFKFTVL	48.2432	19.43	0.8798	0.0271	0.7258	0.0588
SAYLYQSL	8	45.4458	3.52	0.9881	0.0018	0.8836	0.0074	SB						VNTHFSHL	59.0777	9.54	0.9313	0.0111	0.7915	0.0194
STFIYNSI	8	58.3167	7.93	0.9185	0.0146	0.8087	0.0148	SB						QVYGFLEV	46.2642	48.3	0.7621	0.066	0.6416	0.1454
ELRSPTEL	8	51.7427	20943.1	0.0095	9.7624	0.0804	35.8627	WB						AVFTFEQL	51.2397	6.58	0.9754	0.0038	0.8259	0.0123
DIRDLEAI	8	41.8154	25209.4	0.0037	16.0961	0.0633	47.2486	WB						VMFTLTNL	48.884	4.53	0.9401	0.0092	0.8604	0.0088
AGLQFPVGR	9	45.2315	17182.5	0.0056	13.1088	0.0987	27.3532	WB						QAYVFTLL	41.8777	4.23	0.9727	0.0042	0.8668	0.0084
PFLGIVAEV	9	40.8568	16230.7	0.0041	15.4561	0.104	25.4155	WB						STILFFNL	50.1969	4.38	0.951	0.0076	0.8634	0.0086
LFHLKSSL	8	64.6986	2129.17	0.0811	2.3006	0.2917	3.4016	WB						KGYIFLTL	49.0726	9.97	0.9441	0.0086	0.7875	0.0219
SWIAVQEL	8	48.136	627.95	0.3728	0.4144	0.4046	1.2718	SB						AEYIYPSL	41.8398	272.65	0.4491	0.2926	0.4817	0.6436
VAPTFSPNL	9	42.9642	7.46	0.9654	0.0053	0.8142	0.014	SB						AVYQFGSAL	49.0509	11.56	0.8854	0.0243	0.7738	0.0286
VFYGVFTL	8	48.4452	62.54	0.6103	0.1369	0.6178	0.1858	SB						SQFKYALV	44.0421	10.01	0.8453	0.0366	0.7871	0.0222
VAVNLIMGL	9	49.4336	129.32	0.4398	0.3055	0.5506	0.353	SB						TGYNIQNF	46.5141	446.34	0.4724	0.2633	0.4361	0.9737
AGYMYTQL	8	51.3571	4.86	0.9766	0.0036	0.8539	0.0092	SB						ANLIYYSL	44.9841	14.42	0.8764	0.0289	0.7534	0.038
TQYTFSSI	8	48.6164	10.49	0.8916	0.0219	0.7827	0.0255	SB						SVIQLLHM	42.9486	254.99	0.5769	0.164	0.4879	0.6081
TSGHFERL	8	44.9266	241.16	0.4937	0.2404	0.493	0.5804	SB						SNYSYPQV	48.9681	7.19	0.9615	0.0059	0.8177	0.0135
NTVTGRWL	8	55.4812	20840.3	0.0034	16.8993	0.0809	35.6147	WB						SIDYYPSL	49.1693	70.32	0.7236	0.0842	0.6069	0.2048
ANFPRATGL	9	40.956	29.24	0.8351	0.0389	0.688	0.0866	SB						IDYEFSAL	46.6117	28.55	0.7579	0.0676	0.6902	0.0851
SLFAVLPSL	9	52.8073	158.06	0.4637	0.2743	0.5321	0.416	SB						VIYTHPEV	42.9582	26.52	0.8428	0.0372	0.6971	0.0804
VIVRFLTV	8	50.3946	19.64	0.8434	0.037	0.7248	0.0595	SB						ISPAYFFL	41.4533	6.83	0.852	0.0351	0.8224	0.0128
SHHSMVSM	8	42.9666	1959.92	0.1152	1.6649	0.2994	3.1777	WB						VNSIFQHL	44.9907	16.64	0.9228	0.0135	0.7401	0.0484
TVIGAFLNL	9	45.0041	40.08	0.7014	0.094	0.6589	0.1187	SB						TNVLFNHL	44.9783	16.43	0.8812	0.0263	0.7413	0.0473
ALLQYINL	8	45.1512	70.49	0.6469	0.1158	0.6067	0.2053	SB						QGQIYVHL	42.946	366.98	0.4579	0.2815	0.4542	0.8364
STFVYNSM	8	49.5925	6	0.944	0.0086	0.8345	0.0111	SB						KNVLFSHL	41.1156	7.8	0.9444	0.0086	0.8101	0.0146
SSPQFVGNL	9	43.3954	11.93	0.9098	0.0168	0.7709	0.0296	SB						VWLEAARL	48.6139	140.94	0.4743	0.2609	0.5427	0.3796
SGYKFFSL	8	48.816	3.94	0.9825	0.0027	0.8733	0.008	SB						VNIPFVRL	45.1049	4.48	0.9908	0.0014	0.8614	0.0088
AGLEVYPSI	9	48.9394	574.97	0.3457	0.4672	0.4127	1.1921	SB						STFGQNTGF	40.8331	1060.09	0.1561	1.2287	0.3562	1.9246
RAPSYIEI	8	43.9297	270.11	0.5148	0.2218	0.4825	0.6386	SB						ISPNFSFM	44.8364	15.37	0.7722	0.0621	0.7475	0.0416
AQIRFSNI	8	42.9542	35.88	0.693	0.0967	0.6691	0.1058	SB						STLTYSRM	48.2432	12.61	0.8635	0.0325	0.7657	0.0319
IIITFNDL	8	49.3832	16.13	0.7995	0.0519	0.743	0.0457	SB						KTFTFDTV	41.8749	40.35	0.6522	0.1135	0.6583	0.1195
VITEFARI	8	42.4385	33.12	0.7186	0.0871	0.6765	0.097	SB						AQFEHTIL	48.4057	229.05	0.5095	0.2265	0.4978	0.5556
INLSFNKL	8	40.8266	8.16	0.9478	0.0081	0.806	0.0154	SB						IGYEHEVL	42.9675	74.47	0.747	0.0722	0.6016	0.2172
KVITFIDL	8	47.9815	42.88	0.7413	0.075	0.6526	0.1271	SB						KGYAFINF	53.0688	31.85	0.7715	0.0624	0.6801	0.0931
ISLLYNLL	8	48.0237	5.02	0.9137	0.0159	0.8509	0.0094	SB						TFLSIEHL	51.7807	910.77	0.2342	0.7932	0.3702	1.6866
SIFEFVHA	8	45.9368	27.83	0.7221	0.0851	0.6926	0.0834	SB						FSVHFPLL	53.0299	22.06	0.8104	0.0477	0.7141	0.0663
GSLVCFPNL	9	42.9592	162.8	0.1835	1.0438	0.5293	0.4257	WB						QIIPFKTL	44.2398	67.5	0.8591	0.0335	0.6107	0.1972
IGYIHSLM	8	42.9647	11.6	0.8399	0.0378	0.7735	0.0287	SB						VALLFRQL	51.4215	6.18	0.9608	0.006	0.8317	0.0115
TQQLYPSL	8	47.4042	212.97	0.5215	0.2158	0.5045	0.5205	SB						SAFDFENM	43.4737	9.63	0.9335	0.0105	0.7907	0.0197
VGINYREV	8	40.9635	74.64	0.6195	0.1298	0.6014	0.2177	SB						SSYTFPKM	52.5694	4	0.9882	0.0018	0.8719	0.0081
AVDRFQTL	8	42.9502	365.56	0.5952	0.1485	0.4546	0.8336	SB						TSFRYSSL	46.5142	2.66	0.9885	0.0018	0.9096	0.0057
GIMRFVNI	8	43.2917	73.49	0.5137	0.2227	0.6028	0.2144	SB						VNHLYSDL	40.5445	24.2	0.703	0.0935	0.7055	0.0725
SVIKFENL	8	51.3636	7.15	0.979	0.0032	0.8181	0.0134	SB						VFRELPSL	48.7093	227.94	0.4567	0.2831	0.4982	0.5533
VVYVLPML	8	40.9204	9.77	0.9328	0.0107	0.7893	0.0202	SB						VWIPSVFL	50.7373	352.05	0.377	0.4062	0.4581	0.8068
SNLKYILV	8	50.5489	37.89	0.7474	0.0721	0.6641	0.1122	SB						ARIIFNQV	40.6594	2277.24	0.1357	1.4168	0.2855	3.5969
SAFEHTQM	8	42.9595	53.47	0.8318	0.0396	0.6322	0.1615	SB						LVLEFNLL	41.0202	37.35	0.7233	0.0844	0.6654	0.1105
AIPEFMNL	8	40.8671	29.02	0.8886	0.0231	0.6887	0.0861	SB						VLLQFNLI	41.0204	122.97	0.3893	0.3857	0.5553	0.3374
STWVFPTL	8	52.5643	6.14	0.9457	0.0084	0.8323	0.0114	SB						SIYRVPLL	42.9671	14.44	0.914	0.0158	0.7532	0.0381
VGWKYQAV	8	42.9673	27.15	0.754	0.0691	0.6949	0.0819	SB						SSMAFKQM	65.0969	19.75	0.8428	0.0372	0.7243	0.0599
KVVEFSEL	8	44.9612	22.64	0.9009	0.0189	0.7117	0.0678	SB						ATFIFSYI	49.2868	7.38	0.8595	0.0334	0.8153	0.0138
TIVDFLSR	8	46.0742	11460.9	0.0067	11.9158	0.1361	16.7722	WB						VNFINQNL	40.9843	19.41	0.8585	0.0336	0.7259	0.0588
IILKYIGM	8	45.0416	21.11	0.7975	0.0526	0.7181	0.0638	SB						TSPLFLHF	42.9605	105.51	0.6581	0.1109	0.5694	0.293
SSYIYGYV	8	42.9527	4.16	0.8894	0.0228	0.8682	0.0083	SB						VPFEFPLL	41.8432	72.97	0.6541	0.1127	0.6035	0.2128
GSSPKFSEI	9	46.0264	4477.14	0.0739	2.4564	0.223	6.4663	WB						VNVEFVRV	55.9114	16.29	0.8924	0.0216	0.7421	0.0466
ISVSFYHV	8	50.9685	7.51	0.8761	0.0291	0.8137	0.0141	SB						VNLVFEKI	41.7458	51.25	0.7095	0.0913	0.6362	0.1547
VSYLFSHV	8	49.1297	2.13	0.9918	0.0013	0.93	0.0044	SB						STFIYNSM	50.0137	6.28	0.9428	0.0088	0.8301	0.0117
AVFTWTNL	8	49.1047	9.53	0.9162	0.0152	0.7916	0.0194	SB						ESPEFVRV	41.0245	1103.35	0.3907	0.3833	0.3525	1.9842
TSVRFTQL	8	51.6181	9.5	0.9565	0.0067	0.7919	0.0193	SB						TALRFLEL	45.1484	14.91	0.89	0.0225	0.7503	0.0395
IAFIFNNL	8	54.1624	2.5	0.9895	0.0016	0.9152	0.0054	SB						RVIDFTVL	56.2823	55.03	0.7932	0.0542	0.6296	0.1661
KVLVFSQM	8	40.8998	25.03	0.8296	0.0402	0.7024	0.0755	SB						AGYTFEYL	42.9499	7.72	0.9417	0.009	0.8111	0.0144
SNFTFSHL	8	42.9876	2.52	0.9928	0.0011	0.9147	0.0054	SB						ATQQFQQL	45.8219	158.33	0.7463	0.0726	0.5319	0.4165
AMVEFVKL	8	45.0788	31.79	0.8546	0.0345	0.6803	0.0929	SB						VMLHSFTL	44.1773	49.03	0.5088	0.2271	0.6402	0.1477
IFFIVSQV	8	45.0484	180.17	0.405	0.3606	0.52	0.459	SB						RVDVFTNL	42.5649	164.19	0.5911	0.1518	0.5285	0.4285
SAFIFRVL	8	44.3139	6.5	0.9408	0.0091	0.8271	0.0121	SB						SFLDVRNL	47.1597	336.45	0.417	0.3417	0.4622	0.7744
HIYSFSSL	8	42.9608	6.24	0.9671	0.0051	0.8308	0.0116	SB						SQLIYNLI	45.0197	182.14	0.3197	0.5238	0.519	0.4626
VSVYYSHV	8	49.0948	7.26	0.8566	0.034	0.8168	0.0136	SB						SVVRYVQL	43.9821	9.6	0.9681	0.0049	0.7909	0.0196
RTFSWASV	8	45.1078	63.16	0.4579	0.2815	0.6168	0.1872	SB						QSYILRAL	46.1176	30.9	0.792	0.0547	0.6829	0.09
NVFTFVNL	8	49.0573	5.79	0.9661	0.0052	0.8377	0.0106	SB						IQTSFQQL	40.8196	112.29	0.6765	0.1029	0.5637	0.3094
ISLYFPTL	8	52.9885	3.91	0.9749	0.0039	0.8739	0.008	SB						RSPEYLSL	51.1573	36.24	0.8761	0.0291	0.6682	0.107
AQFKFTVL	8	48.2432	19.43	0.8798	0.0271	0.7258	0.0588	SB						ESVEFQNL	44.1289	249.45	0.5981	0.1463	0.4899	0.5967
VNTHFSHL	8	59.0777	9.54	0.9313	0.0111	0.7915	0.0194	SB						SAYLYSYV	48.106	3.54	0.9463	0.0083	0.8833	0.0074
QVYGFLEV	8	46.2642	48.3	0.7621	0.066	0.6416	0.1454	SB						STFTFTYV	47.1352	4.84	0.9422	0.0089	0.8543	0.0092
AVFTFEQL	8	51.2397	6.58	0.9754	0.0038	0.8259	0.0123	SB						ANFTFPRL	49.4481	3.5	0.9901	0.0015	0.8841	0.0073
VMFTLTNL	8	48.884	4.53	0.9401	0.0092	0.8604	0.0088	SB						ITGMFQRL	40.9805	31.14	0.7846	0.0574	0.6822	0.0908
QAYVFTLL	8	41.8777	4.23	0.9727	0.0042	0.8668	0.0084	SB						KSLDYLNL	49.0604	14.13	0.8853	0.0244	0.7552	0.0371
STILFFNL	8	50.1969	4.38	0.951	0.0076	0.8634	0.0086	SB						IGLGYTQTL	42.9671	89.84	0.6411	0.1183	0.5843	0.2579
KGYIFLTL	8	49.0726	9.97	0.9441	0.0086	0.7875	0.0219	SB						VAYKMQLL	41.7868	11.36	0.9359	0.0099	0.7754	0.028
AEYIYPSL	8	41.8398	272.65	0.4491	0.2926	0.4817	0.6436	SB						VAYLMQKL	45.8802	11.75	0.9478	0.0081	0.7723	0.0291
AVYQFGSAL	9	49.0509	11.56	0.8854	0.0243	0.7738	0.0286	SB						PNFIMTML	42.9469	1583.14	0.0982	1.9349	0.3191	2.6756
GLFTQYNI	8	50.9556	3922.99	0.0274	5.0979	0.2352	5.7689	WB						VMPYLSQL	42.9462	54.99	0.6948	0.0961	0.6297	0.1659
SQFKYALV	8	44.0421	10.01	0.8453	0.0366	0.7871	0.0222	SB						NAYKFPNL	47.0629	6.75	0.9717	0.0044	0.8236	0.0126
TGYNIQNF	8	46.5141	446.34	0.4724	0.2633	0.4361	0.9737	SB						EITTFSRL	41.8191	943.43	0.2735	0.6492	0.3669	1.7422
ANLIYYSL	8	44.9841	14.42	0.8764	0.0289	0.7534	0.038	SB						VAYKFPEL	46.7648	3.42	0.9909	0.0014	0.8865	0.0072
SVIQLLHM	8	42.9486	254.99	0.5769	0.164	0.4879	0.6081	SB						VMYQVVVI	44.8271	130.1	0.4549	0.2854	0.5501	0.3548
SNYSYPQV	8	48.9681	7.19	0.9615	0.0059	0.8177	0.0135	SB						SLVIFMQL	45.162	60.1	0.7294	0.0809	0.6214	0.1798
SIDYYPSL	8	49.1693	70.32	0.7236	0.0842	0.6069	0.2048	SB						KVFQFLNA	44.2814	45.91	0.5638	0.1752	0.6463	0.1376
IDYEFSAL	8	46.6117	28.55	0.7579	0.0676	0.6902	0.0851	SB						FALRYALL	51.8365	7.99	0.8231	0.0428	0.8079	0.0149
VIYTHPEV	8	42.9582	26.52	0.8428	0.0372	0.6971	0.0804	SB						VIFIFTKV	49.0311	5.24	0.9694	0.0047	0.8469	0.0097
ISPAYFFL	8	41.4533	6.83	0.852	0.0351	0.8224	0.0128	SB						STFEFHSI	49.8061	5.57	0.9709	0.0045	0.8412	0.0101
VNSIFQHL	8	44.9907	16.64	0.9228	0.0135	0.7401	0.0484	SB						STIHFYSL	46.0672	4.71	0.9745	0.0039	0.8567	0.0091
TNVLFNHL	8	44.9783	16.43	0.8812	0.0263	0.7413	0.0473	SB						TAFQFLQL	50.0643	5.25	0.9785	0.0033	0.8467	0.0097
QGQIYVHL	8	42.946	366.98	0.4579	0.2815	0.4542	0.8364	SB						AQYNFILV	48.0094	38.52	0.7191	0.0868	0.6626	0.1141
KNVLFSHL	8	41.1156	7.8	0.9444	0.0086	0.8101	0.0146	SB						QVFDAKNM	52.0368	2432.3	0.1686	1.1371	0.2794	3.8038
VWLEAARL	8	48.6139	140.94	0.4743	0.2609	0.5427	0.3796	SB						SAPRYMDL	49.9041	42.32	0.7686	0.0635	0.6539	0.1251
VNIPFVRL	8	45.1049	4.48	0.9908	0.0014	0.8614	0.0088	SB						AFDYPSRL	44.4871	990.63	0.2804	0.629	0.3624	1.8205
STFGQNTGF	9	40.8331	1060.09	0.1561	1.2287	0.3562	1.9246	WB						QVVIIHML	44.644	3847.66	0.1749	1.095	0.237	5.6741
ISPNFSFM	8	44.8364	15.37	0.7722	0.0621	0.7475	0.0416	SB						ITFIFKSL	48.897	3.3	0.9872	0.002	0.8896	0.007
STLTYSRM	8	48.2432	12.61	0.8635	0.0325	0.7657	0.0319	SB						EVYNFNAI	51.8449	162.94	0.4932	0.2409	0.5293	0.4259
KTFTFDTV	8	41.8749	40.35	0.6522	0.1135	0.6583	0.1195	SB						STIEFKNM	44.4536	14.4	0.918	0.0148	0.7535	0.0379
AQFEHTIL	8	48.4057	229.05	0.5095	0.2265	0.4978	0.5556	SB						TAYAFHFL	50.6669	3.62	0.9794	0.0032	0.8812	0.0075
IGYEHEVL	8	42.9675	74.47	0.747	0.0722	0.6016	0.2172	SB						VVYPFPTF	45.6721	11.93	0.9468	0.0082	0.7709	0.0296
KGYAFINF	8	53.0688	31.85	0.7715	0.0624	0.6801	0.0931	SB						RAYLFNSV	46.724	9.12	0.9104	0.0166	0.7957	0.0183
TFLSIEHL	8	51.7807	910.77	0.2342	0.7932	0.3702	1.6866	WB						RIYQFTAA	41.0053	74.98	0.4332	0.316	0.601	0.2187
FSVHFPLL	8	53.0299	22.06	0.8104	0.0477	0.7141	0.0663	SB						FNYKGKNV	46.2205	588.35	0.3399	0.4785	0.4106	1.2133
QIIPFKTL	8	44.2398	67.5	0.8591	0.0335	0.6107	0.1972	SB						KAFTYINL	52.6682	3.51	0.9825	0.0027	0.884	0.0073
VALLFRQL	8	51.4215	6.18	0.9608	0.006	0.8317	0.0115	SB						VTFSFKQL	42.9669	3.29	0.9916	0.0013	0.8899	0.007
SAFDFENM	8	43.4737	9.63	0.9335	0.0105	0.7907	0.0197	SB						AAVSFISKF	60.8163	139.53	0.6174	0.1314	0.5436	0.3765
SSYTFPKM	8	52.5694	4	0.9882	0.0018	0.8719	0.0081	SB						SGVEFREM	45.0392	119.04	0.6971	0.0954	0.5583	0.3274
TSFRYSSL	8	46.5142	2.66	0.9885	0.0018	0.9096	0.0057	SB						STPEFYQV	44.3986	93.04	0.7643	0.0652	0.581	0.2655
VNHLYSDL	8	40.5445	24.2	0.703	0.0935	0.7055	0.0725	SB						NSFRYNGL	40.809	8.99	0.882	0.0259	0.7971	0.0179
VRSGPFGQI	9	42.15	8375.49	0.0272	5.1309	0.1651	11.9509	WB						TGLPYYTGV	44.874	34.66	0.6998	0.0945	0.6723	0.1017
VFRELPSL	8	48.7093	227.94	0.4567	0.2831	0.4982	0.5533	SB						TAFRFSEL	46.6211	3.49	0.981	0.0029	0.8846	0.0073
VWIPSVFL	8	50.7373	352.05	0.377	0.4062	0.4581	0.8068	SB						VNLPWNQV	37.605	266.18	0.4776	0.2567	0.4839	0.6308
ARIIFNQV	8	40.6594	2277.24	0.1357	1.4168	0.2855	3.5969	WB						TSYRFLAL	52.5266	2.52	0.9907	0.0014	0.9146	0.0054
LVLEFNLL	8	41.0202	37.35	0.7233	0.0844	0.6654	0.1105	SB						SVYVYKVL	47.723	6.72	0.9588	0.0063	0.824	0.0126
VLLQFNLI	8	41.0204	122.97	0.3893	0.3857	0.5553	0.3374	SB						AIVERAAQL	47.0831	348.53	0.4476	0.2946	0.459	0.7996
SIYRVPLL	8	42.9671	14.44	0.914	0.0158	0.7532	0.0381	SB						ISYQFSNL	51.995	1.7	0.9976	0.0004	0.9507	0.0031
SSMAFKQM	8	65.0969	19.75	0.8428	0.0372	0.7243	0.0599	SB						AQYSFDKL	49.0107	53.97	0.7439	0.0737	0.6314	0.163
ATFIFSYI	8	49.2868	7.38	0.8595	0.0334	0.8153	0.0138	SB						ASFSAQTNM	42.9549	99.56	0.5027	0.2324	0.5748	0.2803
VNFINQNL	8	40.9843	19.41	0.8585	0.0336	0.7259	0.0588	SB						TNYIFDSL	51.4596	7.8	0.9332	0.0105	0.8102	0.0146
TSPLFLHF	8	42.9605	105.51	0.6581	0.1109	0.5694	0.293	SB						SWLHTSEL	60.0847	595.01	0.2695	0.6609	0.4095	1.2234
DQIPKFTI	8	48.9837	12366.1	0.0471	3.4873	0.1291	18.2489	WB						KGFEFTLM	46.185	11.05	0.9059	0.0177	0.778	0.0271
VPFEFPLL	8	41.8432	72.97	0.6541	0.1127	0.6035	0.2128	SB						MTFLFANL	50.5668	2.1	0.971	0.0045	0.9314	0.0043
VNVEFVRV	8	55.9114	16.29	0.8924	0.0216	0.7421	0.0466	SB						SSFVFSTVV	43.4123	10.96	0.7886	0.0559	0.7787	0.0269
VNLVFEKI	8	41.7458	51.25	0.7095	0.0913	0.6362	0.1547	SB						YNIVYTSL	54.7378	13.24	0.9076	0.0173	0.7613	0.0341
STFIYNSM	8	50.0137	6.28	0.9428	0.0088	0.8301	0.0117	SB						EIVSFQHL	46.5992	452.69	0.4944	0.2399	0.4348	0.9834
ESPEFVRV	8	41.0245	1103.35	0.3907	0.3833	0.3525	1.9842	SB						AWVKIENL	42.9636	1387.56	0.2534	0.7111	0.3313	2.4041
TALRFLEL	8	45.1484	14.91	0.89	0.0225	0.7503	0.0395	SB						QGYQFPSM	37.0181	23.07	0.8875	0.0235	0.7099	0.0689
RVIDFTVL	8	56.2823	55.03	0.7932	0.0542	0.6296	0.1661	SB						SVLEYSEM	54.1434	27.33	0.8372	0.0384	0.6943	0.0823
AGYTFEYL	8	42.9499	7.72	0.9417	0.009	0.8111	0.0144	SB						DIYSFSEL	40.7359	31.94	0.8155	0.0457	0.6798	0.0934
ATQQFQQL	8	45.8219	158.33	0.7463	0.0726	0.5319	0.4165	SB						NTHEFVNL	40.5095	59.92	0.7959	0.0532	0.6217	0.1794
VMLHSFTL	8	44.1773	49.03	0.5088	0.2271	0.6402	0.1477	SB						LAFLYMTV	61.3815	15.99	0.6581	0.1109	0.7438	0.045
[truncated: 1,109 more rows]
