# Supplementary material for: Mass spectrometry-based thermostability profiling of virus-derived MHC peptide complexes serves as an effective predictor of immunogenicity
Source: Research Square preprint supplement (doi:10.21203/rs.3.rs-5824434/v1), 2025-02-03
Supplement: Supplementary file 4 [file 6777b997c264a5e0124f615b.xlsx]

## Sheet: library_merged
PrecursorMz	ProductMz	Annotation	ProteinId	GeneName	PeptideSequence	ModifiedPeptideSequence	PrecursorCharge	LibraryIntensity	NormalizedRetentionTime	PrecursorIonMobility	FragmentType	FragmentCharge	FragmentSeriesNumber	FragmentLossType	AverageExperimentalRetentionTime
399.74	132.102	y1^1	P04318	VACWR117	GKSPLPSL	GKSPLPSL	2	2994.14	36.6538		y	1	1		1336.31
399.74	186.124	b2^1	P04318	VACWR117	GKSPLPSL	GKSPLPSL	2	2485.4	36.6538		b	1	2		1336.31
399.74	219.134	y2^1	P04318	VACWR117	GKSPLPSL	GKSPLPSL	2	1328.87	36.6538		y	1	2		1336.31
399.74	273.156	b3^1	P04318	VACWR117	GKSPLPSL	GKSPLPSL	2	974.55	36.6538		b	1	3		1336.31
399.74	316.187	y3^1	P04318	VACWR117	GKSPLPSL	GKSPLPSL	2	10000	36.6538		y	1	3		1336.31
399.74	370.208	b4^1	P04318	VACWR117	GKSPLPSL	GKSPLPSL	2	2472.3	36.6538		b	1	4		1336.31
399.74	483.293	b5^1	P04318	VACWR117	GKSPLPSL	GKSPLPSL	2	6578.26	36.6538		b	1	5		1336.31
399.74	613.356	y6^1	P04318	VACWR117	GKSPLPSL	GKSPLPSL	2	1155.21	36.6538		y	1	6		1336.31
399.74	667.377	b7^1	P04318	VACWR117	GKSPLPSL	GKSPLPSL	2	2410.02	36.6538		b	1	7		1336.31
399.835	166.053	y1^1	P52480	Pkm	AMADTFLEHM	AM(UniMod:35)ADTFLEHM(UniMod:35)	3	336.981	29.0562		y	1	1		1136.3
399.835	216.581	y3^2	P52480	Pkm	AMADTFLEHM	AM(UniMod:35)ADTFLEHM(UniMod:35)	3	51.3134	29.0562		y	2	3		1136.3
399.835	219.08	b2^1	P52480	Pkm	AMADTFLEHM	AM(UniMod:35)ADTFLEHM(UniMod:35)	3	809.219	29.0562		b	1	2		1136.3
399.835	273.123	y4^2	P52480	Pkm	AMADTFLEHM	AM(UniMod:35)ADTFLEHM(UniMod:35)	3	1384.98	29.0562		y	2	4		1136.3
399.835	290.117	b3^1	P52480	Pkm	AMADTFLEHM	AM(UniMod:35)ADTFLEHM(UniMod:35)	3	358.413	29.0562		b	1	3		1136.3
399.835	303.112	y2^1	P52480	Pkm	AMADTFLEHM	AM(UniMod:35)ADTFLEHM(UniMod:35)	3	1700.94	29.0562		y	1	2		1136.3
399.835	327.134	b6^2	P52480	Pkm	AMADTFLEHM	AM(UniMod:35)ADTFLEHM(UniMod:35)	3	430.413	29.0562		b	2	6		1136.3
399.835	346.657	y5^2	P52480	Pkm	AMADTFLEHM	AM(UniMod:35)ADTFLEHM(UniMod:35)	3	329.463	29.0562		y	2	5		1136.3
399.835	383.676	b7^2	P52480	Pkm	AMADTFLEHM	AM(UniMod:35)ADTFLEHM(UniMod:35)	3	611.943	29.0562		b	2	7		1136.3
399.835	405.144	b4^1	P52480	Pkm	AMADTFLEHM	AM(UniMod:35)ADTFLEHM(UniMod:35)	3	1009.92	29.0562		b	1	4		1136.3
399.835	432.155	y3^1	P52480	Pkm	AMADTFLEHM	AM(UniMod:35)ADTFLEHM(UniMod:35)	3	4909.31	29.0562		y	1	3		1136.3
399.835	448.197	b8^2	P52480	Pkm	AMADTFLEHM	AM(UniMod:35)ADTFLEHM(UniMod:35)	3	45.0282	29.0562		b	2	8		1136.3
399.835	490.213	y8^2	P52480	Pkm	AMADTFLEHM	AM(UniMod:35)ADTFLEHM(UniMod:35)	3	18.9138	29.0562		y	2	8		1136.3
399.835	506.192	b5^1	P52480	Pkm	AMADTFLEHM	AM(UniMod:35)ADTFLEHM(UniMod:35)	3	5535.23	29.0562		b	1	5		1136.3
399.835	516.726	b9^2	P52480	Pkm	AMADTFLEHM	AM(UniMod:35)ADTFLEHM(UniMod:35)	3	44.7815	29.0562		b	2	9		1136.3
399.835	545.239	y4^1	P52480	Pkm	AMADTFLEHM	AM(UniMod:35)ADTFLEHM(UniMod:35)	3	10000	29.0562		y	1	4		1136.3
399.835	563.731	y9^2	P52480	Pkm	AMADTFLEHM	AM(UniMod:35)ADTFLEHM(UniMod:35)	3	9.93426	29.0562		y	2	9		1136.3
399.835	653.26	b6^1	P52480	Pkm	AMADTFLEHM	AM(UniMod:35)ADTFLEHM(UniMod:35)	3	4287.44	29.0562		b	1	6		1136.3
399.835	692.307	y5^1	P52480	Pkm	AMADTFLEHM	AM(UniMod:35)ADTFLEHM(UniMod:35)	3	389.446	29.0562		y	1	5		1136.3
399.835	766.344	b7^1	P52480	Pkm	AMADTFLEHM	AM(UniMod:35)ADTFLEHM(UniMod:35)	3	96.5232	29.0562		b	1	7		1136.3
399.835	793.355	y6^1	P52480	Pkm	AMADTFLEHM	AM(UniMod:35)ADTFLEHM(UniMod:35)	3	48.1226	29.0562		y	1	6		1136.3
399.835	908.382	y7^1	P52480	Pkm	AMADTFLEHM	AM(UniMod:35)ADTFLEHM(UniMod:35)	3	21.0177	29.0562		y	1	7		1136.3
399.882	166.086	y1^1	Q5XG71	Utp20	VVYIYKEHF	VVYIYKEHF	3	251.792	37.4028		y	1	1		1358.24
399.882	199.144	b2^1	Q5XG71	Utp20	VVYIYKEHF	VVYIYKEHF	3	1438.82	37.4028		b	1	2		1358.24
399.882	256.155	b6^3	Q5XG71	Utp20	VVYIYKEHF	VVYIYKEHF	3	22.16	37.4028		b	3	6		1358.24
399.882	303.145	y2^1	Q5XG71	Utp20	VVYIYKEHF	VVYIYKEHF	3	676.334	37.4028		y	1	2		1358.24
399.882	362.177	y5^2	Q5XG71	Utp20	VVYIYKEHF	VVYIYKEHF	3	171.273	37.4028		y	2	5		1358.24
399.882	362.207	b3^1	Q5XG71	Utp20	VVYIYKEHF	VVYIYKEHF	3	175.673	37.4028		b	1	3		1358.24
399.882	418.719	y6^2	Q5XG71	Utp20	VVYIYKEHF	VVYIYKEHF	3	456.459	37.4028		y	2	6		1358.24
399.882	432.188	y3^1	Q5XG71	Utp20	VVYIYKEHF	VVYIYKEHF	3	478.134	37.4028		y	1	3		1358.24
399.882	500.25	y7^2	Q5XG71	Utp20	VVYIYKEHF	VVYIYKEHF	3	10000	37.4028		y	2	7		1358.24
399.882	516.779	b8^2	Q5XG71	Utp20	VVYIYKEHF	VVYIYKEHF	3	71.6932	37.4028		b	2	8		1358.24
399.882	549.785	y8^2	Q5XG71	Utp20	VVYIYKEHF	VVYIYKEHF	3	6052.87	37.4028		y	2	8		1358.24
399.882	560.283	y4^1	Q5XG71	Utp20	VVYIYKEHF	VVYIYKEHF	3	599.02	37.4028		y	1	4		1358.24
399.882	723.346	y5^1	Q5XG71	Utp20	VVYIYKEHF	VVYIYKEHF	3	5240.26	37.4028		y	1	5		1358.24
399.882	836.43	y6^1	Q5XG71	Utp20	VVYIYKEHF	VVYIYKEHF	3	1957.68	37.4028		y	1	6		1358.24
399.882	999.493	y7^1	Q5XG71	Utp20	VVYIYKEHF	VVYIYKEHF	3	342.888	37.4028		y	1	7		1358.24
400.203	132.102	y1^1	Q3UMZ3	Plpp5	SSFAFAGL	SSFAFAGL	2	6790.2	68.7788		y	1	1		2137.3
400.203	175.071	b2^1	Q3UMZ3	Plpp5	SSFAFAGL	SSFAFAGL	2	1282.99	68.7788		b	1	2		2137.3
400.203	189.123	y2^1	Q3UMZ3	Plpp5	SSFAFAGL	SSFAFAGL	2	8696.52	68.7788		y	1	2		2137.3
400.203	260.16	y3^1	Q3UMZ3	Plpp5	SSFAFAGL	SSFAFAGL	2	4657.77	68.7788		y	1	3		2137.3
400.203	306.145	b6^2	Q3UMZ3	Plpp5	SSFAFAGL	SSFAFAGL	2	1382.14	68.7788		b	2	6		2137.3
400.203	322.14	b3^1	Q3UMZ3	Plpp5	SSFAFAGL	SSFAFAGL	2	2655.58	68.7788		b	1	3		2137.3
400.203	334.656	b7^2	Q3UMZ3	Plpp5	SSFAFAGL	SSFAFAGL	2	286.234	68.7788		b	2	7		2137.3
400.203	393.177	b4^1	Q3UMZ3	Plpp5	SSFAFAGL	SSFAFAGL	2	5936.89	68.7788		b	1	4		2137.3
400.203	407.229	y4^1	Q3UMZ3	Plpp5	SSFAFAGL	SSFAFAGL	2	5434.06	68.7788		y	1	4		2137.3
400.203	478.266	y5^1	Q3UMZ3	Plpp5	SSFAFAGL	SSFAFAGL	2	631.265	68.7788		y	1	5		2137.3
400.203	540.245	b5^1	Q3UMZ3	Plpp5	SSFAFAGL	SSFAFAGL	2	8250.77	68.7788		b	1	5		2137.3
400.203	611.282	b6^1	Q3UMZ3	Plpp5	SSFAFAGL	SSFAFAGL	2	4603.31	68.7788		b	1	6		2137.3
400.203	625.334	y6^1	Q3UMZ3	Plpp5	SSFAFAGL	SSFAFAGL	2	1948.93	68.7788		y	1	6		2137.3
400.203	668.304	b7^1	Q3UMZ3	Plpp5	SSFAFAGL	SSFAFAGL	2	5527.62	68.7788		b	1	7		2137.3
400.203	132.102	y1^1	Q8CIK8	Rfwd3	NYVYAGL	NYVYAGL	2	5891.98	47.0044		y	1	1		1600.81
400.203	189.123	y2^1	Q8CIK8	Rfwd3	NYVYAGL	NYVYAGL	2	5423	47.0044		y	1	2		1600.81
400.203	260.16	y3^1	Q8CIK8	Rfwd3	NYVYAGL	NYVYAGL	2	2044.41	47.0044		y	1	3		1600.81
400.203	278.114	b2^1	Q8CIK8	Rfwd3	NYVYAGL	NYVYAGL	2	1268.27	47.0044		b	1	2		1600.81
400.203	377.182	b3^1	Q8CIK8	Rfwd3	NYVYAGL	NYVYAGL	2	4886.77	47.0044		b	1	3		1600.81
400.203	423.224	y4^1	Q8CIK8	Rfwd3	NYVYAGL	NYVYAGL	2	1004.38	47.0044		y	1	4		1600.81
400.203	522.292	y5^1	Q8CIK8	Rfwd3	NYVYAGL	NYVYAGL	2	2639.25	47.0044		y	1	5		1600.81
400.203	540.245	b4^1	Q8CIK8	Rfwd3	NYVYAGL	NYVYAGL	2	2182.26	47.0044		b	1	4		1600.81
400.203	611.282	b5^1	Q8CIK8	Rfwd3	NYVYAGL	NYVYAGL	2	6546.12	47.0044		b	1	5		1600.81
400.203	668.304	b6^1	Q8CIK8	Rfwd3	NYVYAGL	NYVYAGL	2	10000	47.0044		b	1	6		1600.81
400.219	118.086	y1^1	P31996	Cd68	ATISHATV	ATISHATV	2	1556.5	7.9744		y	1	1		631.723
400.219	173.092	b2^1	P31996	Cd68	ATISHATV	ATISHATV	2	3086.36	7.9744		b	1	2		631.723
400.219	187.108	b4^2	P31996	Cd68	ATISHATV	ATISHATV	2	154.271	7.9744		b	2	4		631.723
400.219	214.119	y4^2	P31996	Cd68	ATISHATV	ATISHATV	2	165.034	7.9744		y	2	4		631.723
400.219	219.134	y2^1	P31996	Cd68	ATISHATV	ATISHATV	2	680.337	7.9744		y	1	2		631.723
400.219	290.171	y3^1	P31996	Cd68	ATISHATV	ATISHATV	2	312.187	7.9744		y	1	3		631.723
400.219	314.177	y6^2	P31996	Cd68	ATISHATV	ATISHATV	2	849.61	7.9744		y	2	6		631.723
400.219	341.68	b7^2	P31996	Cd68	ATISHATV	ATISHATV	2	448.223	7.9744		b	2	7		631.723
400.219	364.701	y7^2	P31996	Cd68	ATISHATV	ATISHATV	2	565.376	7.9744		y	2	7		631.723
400.219	427.23	y4^1	P31996	Cd68	ATISHATV	ATISHATV	2	1223.87	7.9744		y	1	4		631.723
400.219	510.267	b5^1	P31996	Cd68	ATISHATV	ATISHATV	2	1872.54	7.9744		b	1	5		631.723
400.219	514.262	y5^1	P31996	Cd68	ATISHATV	ATISHATV	2	3331.29	7.9744		y	1	5		631.723
400.219	581.304	b6^1	P31996	Cd68	ATISHATV	ATISHATV	2	1577.12	7.9744		b	1	6		631.723
400.219	627.346	y6^1	P31996	Cd68	ATISHATV	ATISHATV	2	10000	7.9744		y	1	6		631.723
400.219	682.352	b7^1	P31996	Cd68	ATISHATV	ATISHATV	2	4831.6	7.9744		b	1	7		631.723
400.219	728.394	y7^1	P31996	Cd68	ATISHATV	ATISHATV	2	1879.59	7.9744		y	1	7		631.723
400.219	132.102	y1^1	Q91X84	Crtc3	SALHTSAL	SALHTSAL	2	3182.25	17.178		y	1	1		851.27
400.219	159.076	b2^1	Q91X84	Crtc3	SALHTSAL	SALHTSAL	2	547.023	17.178		b	1	2		851.27
400.219	203.139	y2^1	Q91X84	Crtc3	SALHTSAL	SALHTSAL	2	258.764	17.178		y	1	2		851.27
400.219	272.16	b3^1	Q91X84	Crtc3	SALHTSAL	SALHTSAL	2	74.879	17.178		b	1	3		851.27
400.219	321.184	y6^2	Q91X84	Crtc3	SALHTSAL	SALHTSAL	2	81.3446	17.178		y	2	6		851.27
400.219	391.219	y4^1	Q91X84	Crtc3	SALHTSAL	SALHTSAL	2	438.906	17.178		y	1	4		851.27
400.219	409.219	b4^1	Q91X84	Crtc3	SALHTSAL	SALHTSAL	2	392.777	17.178		b	1	4		851.27
400.219	510.267	b5^1	Q91X84	Crtc3	SALHTSAL	SALHTSAL	2	1372.76	17.178		b	1	5		851.27
400.219	528.278	y5^1	Q91X84	Crtc3	SALHTSAL	SALHTSAL	2	602.76	17.178		y	1	5		851.27
400.219	597.299	b6^1	Q91X84	Crtc3	SALHTSAL	SALHTSAL	2	1121.61	17.178		b	1	6		851.27
400.219	641.362	y6^1	Q91X84	Crtc3	SALHTSAL	SALHTSAL	2	1826.4	17.178		y	1	6		851.27
400.219	668.336	b7^1	Q91X84	Crtc3	SALHTSAL	SALHTSAL	2	10000	17.178		b	1	7		851.27
400.233	227.175	b2^1	P63276	Rps17	IIEKYYTRL	IIEKYYTRL	3	1289.94	31.272		b	1	2		1208.19
400.233	324.843	y7^3	P63276	Rps17	IIEKYYTRL	IIEKYYTRL	3	139.322	31.272		y	3	7		1208.19
400.233	389.251	y3^1	P63276	Rps17	IIEKYYTRL	IIEKYYTRL	3	893.28	31.272		y	1	3		1208.19
400.233	422.24	y6^2	P63276	Rps17	IIEKYYTRL	IIEKYYTRL	3	1474.96	31.272		y	2	6		1208.19
400.233	486.761	y7^2	P63276	Rps17	IIEKYYTRL	IIEKYYTRL	3	5372.21	31.272		y	2	7		1208.19
400.233	543.303	y8^2	P63276	Rps17	IIEKYYTRL	IIEKYYTRL	3	10000	31.272		y	2	8		1208.19
400.233	552.314	y4^1	P63276	Rps17	IIEKYYTRL	IIEKYYTRL	3	2699.05	31.272		y	1	4		1208.19
400.233	715.377	y5^1	P63276	Rps17	IIEKYYTRL	IIEKYYTRL	3	5198.38	31.272		y	1	5		1208.19
400.233	843.472	y6^1	P63276	Rps17	IIEKYYTRL	IIEKYYTRL	3	240.538	31.272		y	1	6		1208.19
400.239	100.076	b1^1	Q8BMG1	Atrip	VFPVLPQ	VFPVLPQ	2	101.47	63.6532		b	1	1		2010.24
400.239	147.076	y1^1	Q8BMG1	Atrip	VFPVLPQ	VFPVLPQ	2	1947.99	63.6532		y	1	1		2010.24
400.239	244.129	y2^1	Q8BMG1	Atrip	VFPVLPQ	VFPVLPQ	2	10000	63.6532		y	1	2		2010.24
400.239	247.144	b2^1	Q8BMG1	Atrip	VFPVLPQ	VFPVLPQ	2	2637.6	63.6532		b	1	2		2010.24
400.239	327.205	b6^2	Q8BMG1	Atrip	VFPVLPQ	VFPVLPQ	2	727.892	63.6532		b	2	6		2010.24
400.239	344.197	b3^1	Q8BMG1	Atrip	VFPVLPQ	VFPVLPQ	2	1098.23	63.6532		b	1	3		2010.24
400.239	443.265	b4^1	Q8BMG1	Atrip	VFPVLPQ	VFPVLPQ	2	945.219	63.6532		b	1	4		2010.24
400.239	553.334	y5^1	Q8BMG1	Atrip	VFPVLPQ	VFPVLPQ	2	3989.68	63.6532		y	1	5		2010.24
400.239	556.349	b5^1	Q8BMG1	Atrip	VFPVLPQ	VFPVLPQ	2	5890.96	63.6532		b	1	5		2010.24
400.239	653.402	b6^1	Q8BMG1	Atrip	VFPVLPQ	VFPVLPQ	2	735.33	63.6532		b	1	6		2010.24
400.24	171.113	b2^1	P60710	Actb	AVFPSIVGRPR	AVFPSIVGRPR	3	1416.11	36.9901		b	1	2		1345.12
400.24	175.119	y1^1	P60710	Actb	AVFPSIVGRPR	AVFPSIVGRPR	3	51.5967	36.9901		y	1	1		1345.12
400.24	272.172	y2^1	P60710	Actb	AVFPSIVGRPR	AVFPSIVGRPR	3	137.04	36.9901		y	1	2		1345.12
400.24	294.515	y8^3	P60710	Actb	AVFPSIVGRPR	AVFPSIVGRPR	3	245.229	36.9901		y	3	8		1345.12
400.24	309.852	b9^3	P60710	Actb	AVFPSIVGRPR	AVFPSIVGRPR	3	31.6765	36.9901		b	3	9		1345.12
400.24	318.181	b3^1	P60710	Actb	AVFPSIVGRPR	AVFPSIVGRPR	3	223.652	36.9901		b	1	3		1345.12
400.24	343.538	y9^3	P60710	Actb	AVFPSIVGRPR	AVFPSIVGRPR	3	1760.85	36.9901		y	3	9		1345.12
400.24	349.227	y6^2	P60710	Actb	AVFPSIVGRPR	AVFPSIVGRPR	3	38.3537	36.9901		y	2	6		1345.12
400.24	357.713	b7^2	P60710	Actb	AVFPSIVGRPR	AVFPSIVGRPR	3	22.6901	36.9901		b	2	7		1345.12
400.24	392.743	y7^2	P60710	Actb	AVFPSIVGRPR	AVFPSIVGRPR	3	454.234	36.9901		y	2	7		1345.12
400.24	441.269	y8^2	P60710	Actb	AVFPSIVGRPR	AVFPSIVGRPR	3	5002.63	36.9901		y	2	8		1345.12
400.24	485.294	y4^1	P60710	Actb	AVFPSIVGRPR	AVFPSIVGRPR	3	63.0744	36.9901		y	1	4		1345.12
400.24	514.804	y9^2	P60710	Actb	AVFPSIVGRPR	AVFPSIVGRPR	3	10000	36.9901		y	2	9		1345.12
400.24	564.338	y10^2	P60710	Actb	AVFPSIVGRPR	AVFPSIVGRPR	3	317.809	36.9901		y	2	10		1345.12
400.24	584.363	y5^1	P60710	Actb	AVFPSIVGRPR	AVFPSIVGRPR	3	187.774	36.9901		y	1	5		1345.12
400.24	697.447	y6^1	P60710	Actb	AVFPSIVGRPR	AVFPSIVGRPR	3	21.1219	36.9901		y	1	6		1345.12
400.24	784.479	y7^1	P60710	Actb	AVFPSIVGRPR	AVFPSIVGRPR	3	193.722	36.9901		y	1	7		1345.12
400.257	129.102	b1^1	Q68FD5	Cltc	KQLPLVKPYL	KQLPLVKPYL	3	728.559	42.1231		b	1	1		1480.05
400.257	132.102	y1^1	Q68FD5	Cltc	KQLPLVKPYL	KQLPLVKPYL	3	1942.12	42.1231		y	1	1		1480.05
400.257	234.152	b4^2	Q68FD5	Cltc	KQLPLVKPYL	KQLPLVKPYL	3	596.13	42.1231		b	2	4		1480.05
400.257	257.161	b2^1	Q68FD5	Cltc	KQLPLVKPYL	KQLPLVKPYL	3	163.909	42.1231		b	1	2		1480.05
400.257	290.694	b5^2	Q68FD5	Cltc	KQLPLVKPYL	KQLPLVKPYL	3	642.804	42.1231		b	2	5		1480.05
400.257	295.165	y2^1	Q68FD5	Cltc	KQLPLVKPYL	KQLPLVKPYL	3	354.184	42.1231		y	1	2		1480.05
400.257	310.194	y5^2	Q68FD5	Cltc	KQLPLVKPYL	KQLPLVKPYL	3	617.487	42.1231		y	2	5		1480.05
400.257	314.872	y8^3	Q68FD5	Cltc	KQLPLVKPYL	KQLPLVKPYL	3	38.4257	42.1231		y	3	8		1480.05
400.257	340.229	b6^2	Q68FD5	Cltc	KQLPLVKPYL	KQLPLVKPYL	3	323.975	42.1231		b	2	6		1480.05
400.257	370.245	b3^1	Q68FD5	Cltc	KQLPLVKPYL	KQLPLVKPYL	3	5008.32	42.1231		b	1	3		1480.05
400.257	392.218	y3^1	Q68FD5	Cltc	KQLPLVKPYL	KQLPLVKPYL	3	2627.24	42.1231		y	1	3		1480.05
400.257	404.276	b7^2	Q68FD5	Cltc	KQLPLVKPYL	KQLPLVKPYL	3	19.1579	42.1231		b	2	7		1480.05
400.257	415.263	y7^2	Q68FD5	Cltc	KQLPLVKPYL	KQLPLVKPYL	3	546.315	42.1231		y	2	7		1480.05
400.257	452.803	b8^2	Q68FD5	Cltc	KQLPLVKPYL	KQLPLVKPYL	3	303.667	42.1231		b	2	8		1480.05
400.257	467.298	b4^1	Q68FD5	Cltc	KQLPLVKPYL	KQLPLVKPYL	3	7006.61	42.1231		b	1	4		1480.05
400.257	471.805	y8^2	Q68FD5	Cltc	KQLPLVKPYL	KQLPLVKPYL	3	70.0854	42.1231		y	2	8		1480.05
400.257	520.313	y4^1	Q68FD5	Cltc	KQLPLVKPYL	KQLPLVKPYL	3	3588.74	42.1231		y	1	4		1480.05
400.257	534.334	b9^2	Q68FD5	Cltc	KQLPLVKPYL	KQLPLVKPYL	3	5848.35	42.1231		b	2	9		1480.05
400.257	535.834	y9^2	Q68FD5	Cltc	KQLPLVKPYL	KQLPLVKPYL	3	22.056	42.1231		y	2	9		1480.05
400.257	580.382	b5^1	Q68FD5	Cltc	KQLPLVKPYL	KQLPLVKPYL	3	2442.82	42.1231		b	1	5		1480.05
400.257	619.381	y5^1	Q68FD5	Cltc	KQLPLVKPYL	KQLPLVKPYL	3	10000	42.1231		y	1	5		1480.05
400.257	679.45	b6^1	Q68FD5	Cltc	KQLPLVKPYL	KQLPLVKPYL	3	2560.07	42.1231		b	1	6		1480.05
400.257	732.465	y6^1	Q68FD5	Cltc	KQLPLVKPYL	KQLPLVKPYL	3	1672.67	42.1231		y	1	6		1480.05
400.257	807.545	b7^1	Q68FD5	Cltc	KQLPLVKPYL	KQLPLVKPYL	3	554.459	42.1231		b	1	7		1480.05
400.257	829.518	y7^1	Q68FD5	Cltc	KQLPLVKPYL	KQLPLVKPYL	3	313.719	42.1231		y	1	7		1480.05
400.261	132.102	y1^1	P04021	VACWR052	INRGVKI	INRGVKI	2	1137.08	14.6114		y	1	1		792.719
400.261	228.134	b2^1	P04021	VACWR052	INRGVKI	INRGVKI	2	143.382	14.6114		b	1	2		792.719
400.261	260.197	y2^1	P04021	VACWR052	INRGVKI	INRGVKI	2	988.366	14.6114		y	1	2		792.719
400.261	334.714	b6^2	P04021	VACWR052	INRGVKI	INRGVKI	2	3684.51	14.6114		b	2	6		792.719
400.261	343.719	y6^2	P04021	VACWR052	INRGVKI	INRGVKI	2	5404.98	14.6114		y	2	6		792.719
400.261	384.235	b3^1	P04021	VACWR052	INRGVKI	INRGVKI	2	504.417	14.6114		b	1	3		792.719
400.261	441.257	b4^1	P04021	VACWR052	INRGVKI	INRGVKI	2	1427.17	14.6114		b	1	4		792.719
400.261	540.325	b5^1	P04021	VACWR052	INRGVKI	INRGVKI	2	8312.25	14.6114		b	1	5		792.719
400.261	572.388	y5^1	P04021	VACWR052	INRGVKI	INRGVKI	2	579.991	14.6114		y	1	5		792.719
400.261	668.42	b6^1	P04021	VACWR052	INRGVKI	INRGVKI	2	3087.14	14.6114		b	1	6		792.719
400.261	686.431	y6^1	P04021	VACWR052	INRGVKI	INRGVKI	2	10000	14.6114		y	1	6		792.719
400.729	147.113	y1^1	Q5SPL2	Phf12	PVNTEIK	PVNTEIK	2	788.855	8.39883		y	1	1		640.759
400.729	197.128	b2^1	Q5SPL2	Phf12	PVNTEIK	PVNTEIK	2	2955.28	8.39883		b	1	2		640.759
400.729	260.197	y2^1	Q5SPL2	Phf12	PVNTEIK	PVNTEIK	2	381.49	8.39883		y	1	2		640.759
400.729	389.239	y3^1	Q5SPL2	Phf12	PVNTEIK	PVNTEIK	2	699.899	8.39883		y	1	3		640.759
400.729	604.33	y5^1	Q5SPL2	Phf12	PVNTEIK	PVNTEIK	2	10000	8.39883		y	1	5		640.759
400.729	703.398	y6^1	Q5SPL2	Phf12	PVNTEIK	PVNTEIK	2	4359.33	8.39883		y	1	6		640.759
400.729	147.113	y1^1	iRT-pepB		PVTGLDAK	PVTGLDAK	2	309.282	8.13976		y	1	1		635.714
400.729	197.128	b2^1	iRT-pepB		PVTGLDAK	PVTGLDAK	2	1674.77	8.13976		b	1	2		635.714
400.729	218.15	y2^1	iRT-pepB		PVTGLDAK	PVTGLDAK	2	2426.43	8.13976		y	1	2		635.714
400.729	292.158	b6^2	iRT-pepB		PVTGLDAK	PVTGLDAK	2	5.80866	8.13976		b	2	6		635.714
400.729	298.176	b3^1	iRT-pepB		PVTGLDAK	PVTGLDAK	2	354.778	8.13976		b	1	3		635.714
400.729	302.669	y6^2	iRT-pepB		PVTGLDAK	PVTGLDAK	2	8.86834	8.13976		y	2	6		635.714
400.729	333.177	y3^1	iRT-pepB		PVTGLDAK	PVTGLDAK	2	229.789	8.13976		y	1	3		635.714
400.729	352.203	y7^2	iRT-pepB		PVTGLDAK	PVTGLDAK	2	72.7888	8.13976		y	2	7		635.714
400.729	355.198	b4^1	iRT-pepB		PVTGLDAK	PVTGLDAK	2	110.228	8.13976		b	1	4		635.714
400.729	446.261	y4^1	iRT-pepB		PVTGLDAK	PVTGLDAK	2	110.419	8.13976		y	1	4		635.714
400.729	468.282	b5^1	iRT-pepB		PVTGLDAK	PVTGLDAK	2	159.935	8.13976		b	1	5		635.714
400.729	503.282	y5^1	iRT-pepB		PVTGLDAK	PVTGLDAK	2	866.948	8.13976		y	1	5		635.714
400.729	583.309	b6^1	iRT-pepB		PVTGLDAK	PVTGLDAK	2	2507.12	8.13976		b	1	6		635.714
400.729	604.33	y6^1	iRT-pepB		PVTGLDAK	PVTGLDAK	2	10000	8.13976		y	1	6		635.714
400.729	654.346	b7^1	iRT-pepB		PVTGLDAK	PVTGLDAK	2	140.271	8.13976		b	1	7		635.714
400.729	703.398	y7^1	iRT-pepB		PVTGLDAK	PVTGLDAK	2	2793.56	8.13976		y	1	7		635.714
400.729	333.177	y3^1	Q9R1Y5	Hic1	LGLSPDKA	LGLSPDKA	2	5668.27	15.3257		y	1	3		812.567
400.729	371.229	b4^1	Q9R1Y5	Hic1	LGLSPDKA	LGLSPDKA	2	3988.81	15.3257		b	1	4		812.567
400.729	583.309	b6^1	Q9R1Y5	Hic1	LGLSPDKA	LGLSPDKA	2	10000	15.3257		b	1	6		812.567
400.735	132.102	y1^1	P17374	DUT	APRSGLSL	APRSGLSL	2	2134.16	22.9544		y	1	1		980.212
400.735	169.097	b2^1	P17374	DUT	APRSGLSL	APRSGLSL	2	57.251	22.9544		b	1	2		980.212
400.735	219.134	y2^1	P17374	DUT	APRSGLSL	APRSGLSL	2	3477.7	22.9544		y	1	2		980.212
400.735	325.198	b3^1	P17374	DUT	APRSGLSL	APRSGLSL	2	649.882	22.9544		b	1	3		980.212
400.735	332.218	y3^1	P17374	DUT	APRSGLSL	APRSGLSL	2	35.5731	22.9544		y	1	3		980.212
400.735	335.188	b7^2	P17374	DUT	APRSGLSL	APRSGLSL	2	1174.16	22.9544		b	2	7		980.212
400.735	365.216	y7^2	P17374	DUT	APRSGLSL	APRSGLSL	2	508.293	22.9544		y	2	7		980.212
400.735	412.23	b4^1	P17374	DUT	APRSGLSL	APRSGLSL	2	187.993	22.9544		b	1	4		980.212
400.735	469.252	b5^1	P17374	DUT	APRSGLSL	APRSGLSL	2	549.612	22.9544		b	1	5		980.212
400.735	582.336	b6^1	P17374	DUT	APRSGLSL	APRSGLSL	2	10000	22.9544		b	1	6		980.212
400.735	632.373	y6^1	P17374	DUT	APRSGLSL	APRSGLSL	2	651.729	22.9544		y	1	6		980.212
400.735	669.368	b7^1	P17374	DUT	APRSGLSL	APRSGLSL	2	9054.93	22.9544		b	1	7		980.212
400.735	729.425	y7^1	P17374	DUT	APRSGLSL	APRSGLSL	2	921.829	22.9544		y	1	7		980.212
400.735	132.102	y1^1	Q8R1A4	Dock7	SAVRPASL	SAVRPASL	2	1290.12	13.9723		y	1	1		775.043
400.735	159.076	b2^1	Q8R1A4	Dock7	SAVRPASL	SAVRPASL	2	2671.42	13.9723		b	1	2		775.043
400.735	219.134	y2^1	Q8R1A4	Dock7	SAVRPASL	SAVRPASL	2	1022.46	13.9723		y	1	2		775.043
400.735	258.145	b3^1	Q8R1A4	Dock7	SAVRPASL	SAVRPASL	2	325.538	13.9723		b	1	3		775.043
400.735	272.166	y5^2	Q8R1A4	Dock7	SAVRPASL	SAVRPASL	2	17.0868	13.9723		y	2	5		775.043
400.735	290.171	y3^1	Q8R1A4	Dock7	SAVRPASL	SAVRPASL	2	26.4643	13.9723		y	1	3		775.043
400.735	291.672	b6^2	Q8R1A4	Dock7	SAVRPASL	SAVRPASL	2	26.5327	13.9723		b	2	6		775.043
400.735	321.7	y6^2	Q8R1A4	Dock7	SAVRPASL	SAVRPASL	2	352.96	13.9723		y	2	6		775.043
400.735	335.188	b7^2	Q8R1A4	Dock7	SAVRPASL	SAVRPASL	2	526.203	13.9723		b	2	7		775.043
400.735	357.219	y7^2	Q8R1A4	Dock7	SAVRPASL	SAVRPASL	2	166.393	13.9723		y	2	7		775.043
400.735	387.224	y4^1	Q8R1A4	Dock7	SAVRPASL	SAVRPASL	2	1597.37	13.9723		y	1	4		775.043
400.735	414.246	b4^1	Q8R1A4	Dock7	SAVRPASL	SAVRPASL	2	1884.04	13.9723		b	1	4		775.043
400.735	511.299	b5^1	Q8R1A4	Dock7	SAVRPASL	SAVRPASL	2	444.976	13.9723		b	1	5		775.043
400.735	543.325	y5^1	Q8R1A4	Dock7	SAVRPASL	SAVRPASL	2	3630.38	13.9723		y	1	5		775.043
400.735	582.336	b6^1	Q8R1A4	Dock7	SAVRPASL	SAVRPASL	2	3563.18	13.9723		b	1	6		775.043
400.735	642.393	y6^1	Q8R1A4	Dock7	SAVRPASL	SAVRPASL	2	10000	13.9723		y	1	6		775.043
400.735	669.368	b7^1	Q8R1A4	Dock7	SAVRPASL	SAVRPASL	2	5573.68	13.9723		b	1	7		775.043
400.735	713.43	y7^1	Q8R1A4	Dock7	SAVRPASL	SAVRPASL	2	835.121	13.9723		y	1	7		775.043
400.735	201.123	b2^1	P20152	Vim	SLGSALRP	SLGSALRP	2	1320.47	24.6224		b	1	2		1006.77
400.735	272.172	y2^1	P20152	Vim	SLGSALRP	SLGSALRP	2	162.407	24.6224		y	1	2		1006.77
400.735	343.203	b7^2	P20152	Vim	SLGSALRP	SLGSALRP	2	55.725	24.6224		b	2	7		1006.77
400.735	345.177	b4^1	P20152	Vim	SLGSALRP	SLGSALRP	2	111.77	24.6224		b	1	4		1006.77
400.735	357.219	y7^2	P20152	Vim	SLGSALRP	SLGSALRP	2	330.772	24.6224		y	2	7		1006.77
400.735	385.256	y3^1	P20152	Vim	SLGSALRP	SLGSALRP	2	193.225	24.6224		y	1	3		1006.77
400.735	456.293	y4^1	P20152	Vim	SLGSALRP	SLGSALRP	2	610.411	24.6224		y	1	4		1006.77
400.735	543.325	y5^1	P20152	Vim	SLGSALRP	SLGSALRP	2	650.149	24.6224		y	1	5		1006.77
400.735	600.346	y6^1	P20152	Vim	SLGSALRP	SLGSALRP	2	10000	24.6224		y	1	6		1006.77
400.735	685.399	b7^1	P20152	Vim	SLGSALRP	SLGSALRP	2	293.521	24.6224		b	1	7		1006.77
400.747	132.102	y1^1	P14356	VACWR030	VKNVDII	VKNVDII	2	3952.97	28.5516		y	1	1		1117.19
400.747	228.171	b2^1	P14356	VACWR030	VKNVDII	VKNVDII	2	477.193	28.5516		b	1	2		1117.19
400.747	245.186	y2^1	P14356	VACWR030	VKNVDII	VKNVDII	2	436.902	28.5516		y	1	2		1117.19
400.747	278.658	b5^2	P14356	VACWR030	VKNVDII	VKNVDII	2	415.984	28.5516		b	2	5		1117.19
400.747	335.2	b6^2	P14356	VACWR030	VKNVDII	VKNVDII	2	197.586	28.5516		b	2	6		1117.19
400.747	342.214	b3^1	P14356	VACWR030	VKNVDII	VKNVDII	2	208.349	28.5516		b	1	3		1117.19
400.747	360.213	y3^1	P14356	VACWR030	VKNVDII	VKNVDII	2	312.822	28.5516		y	1	3		1117.19
400.747	441.282	b4^1	P14356	VACWR030	VKNVDII	VKNVDII	2	550.683	28.5516		b	1	4		1117.19
400.747	459.281	y4^1	P14356	VACWR030	VKNVDII	VKNVDII	2	17.6615	28.5516		y	1	4		1117.19
400.747	556.309	b5^1	P14356	VACWR030	VKNVDII	VKNVDII	2	5168.57	28.5516		b	1	5		1117.19
400.747	573.324	y5^1	P14356	VACWR030	VKNVDII	VKNVDII	2	217.06	28.5516		y	1	5		1117.19
400.747	669.393	b6^1	P14356	VACWR030	VKNVDII	VKNVDII	2	10000	28.5516		b	1	6		1117.19
400.747	701.419	y6^1	P14356	VACWR030	VKNVDII	VKNVDII	2	1310.6	28.5516		y	1	6		1117.19
400.747	132.102	y1^1	P23373	VACWR066	IVLSQAGL	IVLSQAGL	2	6507.55	47.9624		y	1	1		1623.76
400.747	189.123	y2^1	P23373	VACWR066	IVLSQAGL	IVLSQAGL	2	8111.48	47.9624		y	1	2		1623.76
400.747	213.16	b2^1	P23373	VACWR066	IVLSQAGL	IVLSQAGL	2	4136.32	47.9624		b	1	2		1623.76
400.747	260.16	y3^1	P23373	VACWR066	IVLSQAGL	IVLSQAGL	2	2542.43	47.9624		y	1	3		1623.76
400.747	271.171	b5^2	P23373	VACWR066	IVLSQAGL	IVLSQAGL	2	261.828	47.9624		b	2	5		1623.76
400.747	306.689	b6^2	P23373	VACWR066	IVLSQAGL	IVLSQAGL	2	1891.83	47.9624		b	2	6		1623.76
400.747	326.244	b3^1	P23373	VACWR066	IVLSQAGL	IVLSQAGL	2	1871.04	47.9624		b	1	3		1623.76
400.747	335.2	b7^2	P23373	VACWR066	IVLSQAGL	IVLSQAGL	2	2389.15	47.9624		b	2	7		1623.76
400.747	388.219	y4^1	P23373	VACWR066	IVLSQAGL	IVLSQAGL	2	700.421	47.9624		y	1	4		1623.76
400.747	413.276	b4^1	P23373	VACWR066	IVLSQAGL	IVLSQAGL	2	1445.36	47.9624		b	1	4		1623.76
400.747	475.251	y5^1	P23373	VACWR066	IVLSQAGL	IVLSQAGL	2	1594.02	47.9624		y	1	5		1623.76
400.747	541.334	b5^1	P23373	VACWR066	IVLSQAGL	IVLSQAGL	2	5957.35	47.9624		b	1	5		1623.76
400.747	588.335	y6^1	P23373	VACWR066	IVLSQAGL	IVLSQAGL	2	4519.93	47.9624		y	1	6		1623.76
400.747	612.372	b6^1	P23373	VACWR066	IVLSQAGL	IVLSQAGL	2	7190.39	47.9624		b	1	6		1623.76
400.747	669.393	b7^1	P23373	VACWR066	IVLSQAGL	IVLSQAGL	2	10000	47.9624		b	1	7		1623.76
400.747	687.404	y7^1	P23373	VACWR066	IVLSQAGL	IVLSQAGL	2	679.508	47.9624		y	1	7		1623.76
400.747	132.102	y1^1	Q7TT37	Elp1	VKVNDLL	VKVNDLL	2	3696.58	28.1704		y	1	1		1104.11
400.747	228.171	b2^1	Q7TT37	Elp1	VKVNDLL	VKVNDLL	2	396.326	28.1704		b	1	2		1104.11
400.747	245.186	y2^1	Q7TT37	Elp1	VKVNDLL	VKVNDLL	2	536.79	28.1704		y	1	2		1104.11
400.747	278.658	b5^2	Q7TT37	Elp1	VKVNDLL	VKVNDLL	2	142.297	28.1704		b	2	5		1104.11
400.747	327.239	b3^1	Q7TT37	Elp1	VKVNDLL	VKVNDLL	2	87.7143	28.1704		b	1	3		1104.11
400.747	335.2	b6^2	Q7TT37	Elp1	VKVNDLL	VKVNDLL	2	363.642	28.1704		b	2	6		1104.11
400.747	360.213	y3^1	Q7TT37	Elp1	VKVNDLL	VKVNDLL	2	385.816	28.1704		y	1	3		1104.11
400.747	441.282	b4^1	Q7TT37	Elp1	VKVNDLL	VKVNDLL	2	706.771	28.1704		b	1	4		1104.11
400.747	556.309	b5^1	Q7TT37	Elp1	VKVNDLL	VKVNDLL	2	4614.66	28.1704		b	1	5		1104.11
400.747	573.324	y5^1	Q7TT37	Elp1	VKVNDLL	VKVNDLL	2	273.16	28.1704		y	1	5		1104.11
400.747	669.393	b6^1	Q7TT37	Elp1	VKVNDLL	VKVNDLL	2	10000	28.1704		b	1	6		1104.11
400.747	701.419	y6^1	Q7TT37	Elp1	VKVNDLL	VKVNDLL	2	878.713	28.1704		y	1	6		1104.11
401.176	166.053	y1^1	Q8K2K6	Agfg1	ATFGTASM	ATFGTASM(UniMod:35)	2	3656.05	13.0198		y	1	1		733.593
401.176	173.092	b2^1	Q8K2K6	Agfg1	ATFGTASM	ATFGTASM(UniMod:35)	2	2982.64	13.0198		b	1	2		733.593
401.176	213.089	y4^2	Q8K2K6	Agfg1	ATFGTASM	ATFGTASM(UniMod:35)	2	373.522	13.0198		y	2	4		733.593
401.176	253.085	y2^1	Q8K2K6	Agfg1	ATFGTASM	ATFGTASM(UniMod:35)	2	3892.26	13.0198		y	1	2		733.593
401.176	275.137	b6^2	Q8K2K6	Agfg1	ATFGTASM	ATFGTASM(UniMod:35)	2	357.426	13.0198		b	2	6		733.593
401.176	315.134	y6^2	Q8K2K6	Agfg1	ATFGTASM	ATFGTASM(UniMod:35)	2	318.771	13.0198		y	2	6		733.593
401.176	320.16	b3^1	Q8K2K6	Agfg1	ATFGTASM	ATFGTASM(UniMod:35)	2	160.65	13.0198		b	1	3		733.593
401.176	324.122	y3^1	Q8K2K6	Agfg1	ATFGTASM	ATFGTASM(UniMod:35)	2	3887.51	13.0198		y	1	3		733.593
401.176	365.657	y7^2	Q8K2K6	Agfg1	ATFGTASM	ATFGTASM(UniMod:35)	2	154.518	13.0198		y	2	7		733.593
401.176	377.182	b4^1	Q8K2K6	Agfg1	ATFGTASM	ATFGTASM(UniMod:35)	2	906.735	13.0198		b	1	4		733.593
401.176	425.17	y4^1	Q8K2K6	Agfg1	ATFGTASM	ATFGTASM(UniMod:35)	2	740.53	13.0198		y	1	4		733.593
401.176	478.23	b5^1	Q8K2K6	Agfg1	ATFGTASM	ATFGTASM(UniMod:35)	2	2277.6	13.0198		b	1	5		733.593
401.176	482.192	y5^1	Q8K2K6	Agfg1	ATFGTASM	ATFGTASM(UniMod:35)	2	1281.52	13.0198		y	1	5		733.593
401.176	549.267	b6^1	Q8K2K6	Agfg1	ATFGTASM	ATFGTASM(UniMod:35)	2	988.986	13.0198		b	1	6		733.593
401.176	629.26	y6^1	Q8K2K6	Agfg1	ATFGTASM	ATFGTASM(UniMod:35)	2	10000	13.0198		y	1	6		733.593
401.176	636.299	b7^1	Q8K2K6	Agfg1	ATFGTASM	ATFGTASM(UniMod:35)	2	951.218	13.0198		b	1	7		733.593
401.176	730.308	y7^1	Q8K2K6	Agfg1	ATFGTASM	ATFGTASM(UniMod:35)	2	363.952	13.0198		y	1	7		733.593
401.193	118.086	y1^1	Q8R332	Nup58	SGFSFGTV	SGFSFGTV	2	6212.6	57.0779		y	1	1		1849.35
401.193	145.061	b2^1	Q8R332	Nup58	SGFSFGTV	SGFSFGTV	2	2625.81	57.0779		b	1	2		1849.35
401.193	219.134	y2^1	Q8R332	Nup58	SGFSFGTV	SGFSFGTV	2	2677.88	57.0779		y	1	2		1849.35
401.193	276.155	y3^1	Q8R332	Nup58	SGFSFGTV	SGFSFGTV	2	1609.42	57.0779		y	1	3		1849.35
401.193	292.129	b3^1	Q8R332	Nup58	SGFSFGTV	SGFSFGTV	2	1888.68	57.0779		b	1	3		1849.35
401.193	329.166	y6^2	Q8R332	Nup58	SGFSFGTV	SGFSFGTV	2	263.182	57.0779		y	2	6		1849.35
401.193	423.224	y4^1	Q8R332	Nup58	SGFSFGTV	SGFSFGTV	2	1114.71	57.0779		y	1	4		1849.35
401.193	526.23	b5^1	Q8R332	Nup58	SGFSFGTV	SGFSFGTV	2	528.51	57.0779		b	1	5		1849.35
401.193	583.251	b6^1	Q8R332	Nup58	SGFSFGTV	SGFSFGTV	2	1020.08	57.0779		b	1	6		1849.35
401.193	657.324	y6^1	Q8R332	Nup58	SGFSFGTV	SGFSFGTV	2	4856.69	57.0779		y	1	6		1849.35
401.193	684.299	b7^1	Q8R332	Nup58	SGFSFGTV	SGFSFGTV	2	10000	57.0779		b	1	7		1849.35
401.193	147.076	y2^1	P52431	Pold1	SVYGFTGA	SVYGFTGA	2	10000	40.0182		y	1	2		1425.89
401.193	187.108	b2^1	P52431	Pold1	SVYGFTGA	SVYGFTGA	2	4572.01	40.0182		b	1	2		1425.89
401.193	248.124	y3^1	P52431	Pold1	SVYGFTGA	SVYGFTGA	2	5558.62	40.0182		y	1	3		1425.89
401.193	328.158	b6^2	P52431	Pold1	SVYGFTGA	SVYGFTGA	2	195.168	40.0182		b	2	6		1425.89
401.193	350.171	b3^1	P52431	Pold1	SVYGFTGA	SVYGFTGA	2	1695.45	40.0182		b	1	3		1425.89
401.193	356.669	b7^2	P52431	Pold1	SVYGFTGA	SVYGFTGA	2	494.586	40.0182		b	2	7		1425.89
401.193	395.193	y4^1	P52431	Pold1	SVYGFTGA	SVYGFTGA	2	1571.53	40.0182		y	1	4		1425.89
401.193	407.193	b4^1	P52431	Pold1	SVYGFTGA	SVYGFTGA	2	2719.94	40.0182		b	1	4		1425.89
401.193	452.214	y5^1	P52431	Pold1	SVYGFTGA	SVYGFTGA	2	1170	40.0182		y	1	5		1425.89
401.193	554.261	b5^1	P52431	Pold1	SVYGFTGA	SVYGFTGA	2	4039.87	40.0182		b	1	5		1425.89
401.193	615.277	y6^1	P52431	Pold1	SVYGFTGA	SVYGFTGA	2	7508.12	40.0182		y	1	6		1425.89
401.193	655.309	b6^1	P52431	Pold1	SVYGFTGA	SVYGFTGA	2	6101.12	40.0182		b	1	6		1425.89
401.193	712.33	b7^1	P52431	Pold1	SVYGFTGA	SVYGFTGA	2	3868.72	40.0182		b	1	7		1425.89
401.216	171.113	b2^1	Q5SSI6	Utp18	GIAGFSHL	GIAGFSHL	2	1967.61	42.0732		b	1	2		1478.45
401.216	242.15	b3^1	Q5SSI6	Utp18	GIAGFSHL	GIAGFSHL	2	217.266	42.0732		b	1	3		1478.45
401.216	269.161	y2^1	Q5SSI6	Utp18	GIAGFSHL	GIAGFSHL	2	340.055	42.0732		y	1	2		1478.45
401.216	299.171	b4^1	Q5SSI6	Utp18	GIAGFSHL	GIAGFSHL	2	99.5863	42.0732		b	1	4		1478.45
401.216	316.164	y6^2	Q5SSI6	Utp18	GIAGFSHL	GIAGFSHL	2	706.392	42.0732		y	2	6		1478.45
401.216	356.193	y3^1	Q5SSI6	Utp18	GIAGFSHL	GIAGFSHL	2	149.412	42.0732		y	1	3		1478.45
401.216	372.706	y7^2	Q5SSI6	Utp18	GIAGFSHL	GIAGFSHL	2	302.892	42.0732		y	2	7		1478.45
401.216	503.261	y4^1	Q5SSI6	Utp18	GIAGFSHL	GIAGFSHL	2	1101.11	42.0732		y	1	4		1478.45
401.216	560.283	y5^1	Q5SSI6	Utp18	GIAGFSHL	GIAGFSHL	2	2633.68	42.0732		y	1	5		1478.45
401.216	631.32	y6^1	Q5SSI6	Utp18	GIAGFSHL	GIAGFSHL	2	10000	42.0732		y	1	6		1478.45
401.221	102.055	y2^2	P60710	Actb	EITALAPS	EITALAPS	2	218.484	32.7287		y	2	2		1244.83
401.221	106.05	y1^1	P60710	Actb	EITALAPS	EITALAPS	2	74.2398	32.7287		y	1	1		1244.83
401.221	203.103	y2^1	P60710	Actb	EITALAPS	EITALAPS	2	10000	32.7287		y	1	2		1244.83
401.221	243.134	b2^1	P60710	Actb	EITALAPS	EITALAPS	2	473.058	32.7287		b	1	2		1244.83
401.221	274.14	y3^1	P60710	Actb	EITALAPS	EITALAPS	2	2193.28	32.7287		y	1	3		1244.83
401.221	280.158	y6^2	P60710	Actb	EITALAPS	EITALAPS	2	216.191	32.7287		y	2	6		1244.83
401.221	348.7	b7^2	P60710	Actb	EITALAPS	EITALAPS	2	72.9183	32.7287		b	2	7		1244.83
401.221	387.224	y4^1	P60710	Actb	EITALAPS	EITALAPS	2	147.771	32.7287		y	1	4		1244.83
401.221	415.219	b4^1	P60710	Actb	EITALAPS	EITALAPS	2	710.011	32.7287		b	1	4		1244.83
401.221	458.261	y5^1	P60710	Actb	EITALAPS	EITALAPS	2	167.185	32.7287		y	1	5		1244.83
401.221	528.303	b5^1	P60710	Actb	EITALAPS	EITALAPS	2	2430.26	32.7287		b	1	5		1244.83
401.221	559.309	y6^1	P60710	Actb	EITALAPS	EITALAPS	2	497.273	32.7287		y	1	6		1244.83
401.221	599.34	b6^1	P60710	Actb	EITALAPS	EITALAPS	2	4632.84	32.7287		b	1	6		1244.83
401.229	132.102	y1^1	O70435	Psma3	FGYNIPLKHL	FGYNIPLKHL	3	216.73	48.6966		y	1	1		1642.51
401.229	133.09	y3^3	O70435	Psma3	FGYNIPLKHL	FGYNIPLKHL	3	529.341	48.6966		y	3	3		1642.51
401.229	135.084	y2^2	O70435	Psma3	FGYNIPLKHL	FGYNIPLKHL	3	186.289	48.6966		y	2	2		1642.51
401.229	199.101	b5^3	O70435	Psma3	FGYNIPLKHL	FGYNIPLKHL	3	266.073	48.6966		b	3	5		1642.51
401.229	205.097	b2^1	O70435	Psma3	FGYNIPLKHL	FGYNIPLKHL	3	868.665	48.6966		b	1	2		1642.51
401.229	269.146	b7^3	O70435	Psma3	FGYNIPLKHL	FGYNIPLKHL	3	46.403	48.6966		b	3	7		1642.51
401.229	269.161	y2^1	O70435	Psma3	FGYNIPLKHL	FGYNIPLKHL	3	706.382	48.6966		y	1	2		1642.51
401.229	304.2	y5^2	O70435	Psma3	FGYNIPLKHL	FGYNIPLKHL	3	531.699	48.6966		y	2	5		1642.51
401.229	357.531	b9^3	O70435	Psma3	FGYNIPLKHL	FGYNIPLKHL	3	23.77	48.6966		b	3	9		1642.51
401.229	360.742	y6^2	O70435	Psma3	FGYNIPLKHL	FGYNIPLKHL	3	149.227	48.6966		y	2	6		1642.51
401.229	368.16	b3^1	O70435	Psma3	FGYNIPLKHL	FGYNIPLKHL	3	156.784	48.6966		b	1	3		1642.51
401.229	397.256	y3^1	O70435	Psma3	FGYNIPLKHL	FGYNIPLKHL	3	350.779	48.6966		y	1	3		1642.51
401.229	417.763	y7^2	O70435	Psma3	FGYNIPLKHL	FGYNIPLKHL	3	211.98	48.6966		y	2	7		1642.51
401.229	482.203	b4^1	O70435	Psma3	FGYNIPLKHL	FGYNIPLKHL	3	1145.61	48.6966		b	1	4		1642.51
401.229	499.295	y8^2	O70435	Psma3	FGYNIPLKHL	FGYNIPLKHL	3	2050.57	48.6966		y	2	8		1642.51
401.229	510.34	y4^1	O70435	Psma3	FGYNIPLKHL	FGYNIPLKHL	3	369.187	48.6966		y	1	4		1642.51
401.229	527.806	y9^2	O70435	Psma3	FGYNIPLKHL	FGYNIPLKHL	3	10000	48.6966		y	2	9		1642.51
401.229	535.793	b9^2	O70435	Psma3	FGYNIPLKHL	FGYNIPLKHL	3	152.767	48.6966		b	2	9		1642.51
401.229	595.287	b5^1	O70435	Psma3	FGYNIPLKHL	FGYNIPLKHL	3	153.357	48.6966		b	1	5		1642.51
401.229	607.393	y5^1	O70435	Psma3	FGYNIPLKHL	FGYNIPLKHL	3	6901.2	48.6966		y	1	5		1642.51
401.229	720.477	y6^1	O70435	Psma3	FGYNIPLKHL	FGYNIPLKHL	3	455.527	48.6966		y	1	6		1642.51
401.229	834.52	y7^1	O70435	Psma3	FGYNIPLKHL	FGYNIPLKHL	3	653.673	48.6966		y	1	7		1642.51
401.231	132.102	y1^1	Q9D920	Borcs5	TSPTNAKLEKL	TSPTNAKLEKL	3	95.2044	17.7379		y	1	1		869.025
401.231	189.087	b2^1	Q9D920	Borcs5	TSPTNAKLEKL	TSPTNAKLEKL	3	2164.17	17.7379		b	1	2		869.025
401.231	260.197	y2^1	Q9D920	Borcs5	TSPTNAKLEKL	TSPTNAKLEKL	3	102.437	17.7379		y	1	2		869.025
401.231	338.538	y9^3	Q9D920	Borcs5	TSPTNAKLEKL	TSPTNAKLEKL	3	1041.45	17.7379		y	3	9		869.025
401.231	389.239	y3^1	Q9D920	Borcs5	TSPTNAKLEKL	TSPTNAKLEKL	3	130.737	17.7379		y	1	3		869.025
401.231	458.777	y8^2	Q9D920	Borcs5	TSPTNAKLEKL	TSPTNAKLEKL	3	780.652	17.7379		y	2	8		869.025
401.231	502.324	y4^1	Q9D920	Borcs5	TSPTNAKLEKL	TSPTNAKLEKL	3	99.0133	17.7379		y	1	4		869.025
401.231	507.303	y9^2	Q9D920	Borcs5	TSPTNAKLEKL	TSPTNAKLEKL	3	10000	17.7379		y	2	9		869.025
401.231	550.819	y10^2	Q9D920	Borcs5	TSPTNAKLEKL	TSPTNAKLEKL	3	336.966	17.7379		y	2	10		869.025
401.231	630.418	y5^1	Q9D920	Borcs5	TSPTNAKLEKL	TSPTNAKLEKL	3	110.921	17.7379		y	1	5		869.025
401.231	701.456	y6^1	Q9D920	Borcs5	TSPTNAKLEKL	TSPTNAKLEKL	3	380.261	17.7379		y	1	6		869.025
401.231	815.499	y7^1	Q9D920	Borcs5	TSPTNAKLEKL	TSPTNAKLEKL	3	820.018	17.7379		y	1	7		869.025
401.231	916.546	y8^1	Q9D920	Borcs5	TSPTNAKLEKL	TSPTNAKLEKL	3	443.029	17.7379		y	1	8		869.025
401.235	116.071	y1^1	Q99P88	Nup155	RFPATLP	RFPATLP	2	1499.55	35.1192		y	1	1		1302.15
401.235	287.161	b5^2	Q99P88	Nup155	RFPATLP	RFPATLP	2	109.161	35.1192		b	2	5		1302.15
401.235	323.184	y6^2	Q99P88	Nup155	RFPATLP	RFPATLP	2	289.512	35.1192		y	2	6		1302.15
401.235	343.703	b6^2	Q99P88	Nup155	RFPATLP	RFPATLP	2	204.727	35.1192		b	2	6		1302.15
401.235	401.23	b3^1	Q99P88	Nup155	RFPATLP	RFPATLP	2	10000	35.1192		b	1	3		1302.15
401.235	573.314	b5^1	Q99P88	Nup155	RFPATLP	RFPATLP	2	264.411	35.1192		b	1	5		1302.15
401.235	686.398	b6^1	Q99P88	Nup155	RFPATLP	RFPATLP	2	1205.49	35.1192		b	1	6		1302.15
401.235	132.102	y1^1	Q8BP00	Iqcb1	RSLLNKQETL	RSLLNKQETL	3	3631.2	26.2529		y	1	1		1051.18
401.235	233.15	y2^1	Q8BP00	Iqcb1	RSLLNKQETL	RSLLNKQETL	3	1512.51	26.2529		y	1	2		1051.18
401.235	235.658	b4^2	Q8BP00	Iqcb1	RSLLNKQETL	RSLLNKQETL	3	236.633	26.2529		b	2	4		1051.18
401.235	244.14	b2^1	Q8BP00	Iqcb1	RSLLNKQETL	RSLLNKQETL	3	353.951	26.2529		b	1	2		1051.18
401.235	292.679	b5^2	Q8BP00	Iqcb1	RSLLNKQETL	RSLLNKQETL	3	75.6745	26.2529		b	2	5		1051.18
401.235	323.854	b8^3	Q8BP00	Iqcb1	RSLLNKQETL	RSLLNKQETL	3	101.312	26.2529		b	3	8		1051.18
401.235	356.727	b6^2	Q8BP00	Iqcb1	RSLLNKQETL	RSLLNKQETL	3	37.975	26.2529		b	2	6		1051.18
401.235	357.224	b3^1	Q8BP00	Iqcb1	RSLLNKQETL	RSLLNKQETL	3	8327.36	26.2529		b	1	3		1051.18
401.235	357.537	b9^3	Q8BP00	Iqcb1	RSLLNKQETL	RSLLNKQETL	3	740.084	26.2529		b	3	9		1051.18
401.235	362.192	y3^1	Q8BP00	Iqcb1	RSLLNKQETL	RSLLNKQETL	3	122.448	26.2529		y	1	3		1051.18
401.235	366.698	y6^2	Q8BP00	Iqcb1	RSLLNKQETL	RSLLNKQETL	3	351.652	26.2529		y	2	6		1051.18
401.235	420.756	b7^2	Q8BP00	Iqcb1	RSLLNKQETL	RSLLNKQETL	3	63.2383	26.2529		b	2	7		1051.18
401.235	470.309	b4^1	Q8BP00	Iqcb1	RSLLNKQETL	RSLLNKQETL	3	4238.24	26.2529		b	1	4		1051.18
401.235	485.277	b8^2	Q8BP00	Iqcb1	RSLLNKQETL	RSLLNKQETL	3	3744.13	26.2529		b	2	8		1051.18
401.235	490.251	y4^1	Q8BP00	Iqcb1	RSLLNKQETL	RSLLNKQETL	3	234.462	26.2529		y	1	4		1051.18
401.235	535.801	b9^2	Q8BP00	Iqcb1	RSLLNKQETL	RSLLNKQETL	3	10000	26.2529		b	2	9		1051.18
401.235	584.351	b5^1	Q8BP00	Iqcb1	RSLLNKQETL	RSLLNKQETL	3	2485.25	26.2529		b	1	5		1051.18
401.235	618.346	y5^1	Q8BP00	Iqcb1	RSLLNKQETL	RSLLNKQETL	3	1033.27	26.2529		y	1	5		1051.18
401.235	712.446	b6^1	Q8BP00	Iqcb1	RSLLNKQETL	RSLLNKQETL	3	400.71	26.2529		b	1	6		1051.18
401.235	732.389	y6^1	Q8BP00	Iqcb1	RSLLNKQETL	RSLLNKQETL	3	3914.08	26.2529		y	1	6		1051.18
401.245	129.102	b1^1	Q8BIJ7	Rufy1	KEVNKAL	KEVNKAL	2	773.926	12.8373		b	1	1		726.583
401.245	132.102	y1^1	Q8BIJ7	Rufy1	KEVNKAL	KEVNKAL	2	1586.04	12.8373		y	1	1		726.583
401.245	203.139	y2^1	Q8BIJ7	Rufy1	KEVNKAL	KEVNKAL	2	477.008	12.8373		y	1	2		726.583
401.245	258.145	b2^1	Q8BIJ7	Rufy1	KEVNKAL	KEVNKAL	2	747.146	12.8373		b	1	2		726.583
401.245	331.234	y3^1	Q8BIJ7	Rufy1	KEVNKAL	KEVNKAL	2	462.191	12.8373		y	1	3		726.583
401.245	335.698	b6^2	Q8BIJ7	Rufy1	KEVNKAL	KEVNKAL	2	160.235	12.8373		b	2	6		726.583
401.245	357.213	b3^1	Q8BIJ7	Rufy1	KEVNKAL	KEVNKAL	2	262.239	12.8373		b	1	3		726.583
401.245	445.277	y4^1	Q8BIJ7	Rufy1	KEVNKAL	KEVNKAL	2	5933.76	12.8373		y	1	4		726.583
401.245	544.345	y5^1	Q8BIJ7	Rufy1	KEVNKAL	KEVNKAL	2	10000	12.8373		y	1	5		726.583
401.245	599.351	b5^1	Q8BIJ7	Rufy1	KEVNKAL	KEVNKAL	2	1031.4	12.8373		b	1	5		726.583
401.245	670.388	b6^1	Q8BIJ7	Rufy1	KEVNKAL	KEVNKAL	2	6120.31	12.8373		b	1	6		726.583
401.258	132.102	y1^1	P01887	B2m	VLVSLTGL	VLVSLTGL	2	5428.59	70.1131		y	1	1		2167.76
401.258	189.123	y2^1	P01887	B2m	VLVSLTGL	VLVSLTGL	2	10000	70.1131		y	1	2		2167.76
401.258	213.16	b2^1	P01887	B2m	VLVSLTGL	VLVSLTGL	2	4548.67	70.1131		b	1	2		2167.76
401.258	290.171	y3^1	P01887	B2m	VLVSLTGL	VLVSLTGL	2	4997.78	70.1131		y	1	3		2167.76
401.258	312.228	b3^1	P01887	B2m	VLVSLTGL	VLVSLTGL	2	1659.69	70.1131		b	1	3		2167.76
401.258	399.26	b4^1	P01887	B2m	VLVSLTGL	VLVSLTGL	2	1918.44	70.1131		b	1	4		2167.76
401.258	403.255	y4^1	P01887	B2m	VLVSLTGL	VLVSLTGL	2	1575.31	70.1131		y	1	4		2167.76
401.258	490.287	y5^1	P01887	B2m	VLVSLTGL	VLVSLTGL	2	2076.49	70.1131		y	1	5		2167.76
401.258	512.344	b5^1	P01887	B2m	VLVSLTGL	VLVSLTGL	2	4070.17	70.1131		b	1	5		2167.76
401.258	589.356	y6^1	P01887	B2m	VLVSLTGL	VLVSLTGL	2	1983.92	70.1131		y	1	6		2167.76
401.258	613.392	b6^1	P01887	B2m	VLVSLTGL	VLVSLTGL	2	6543.82	70.1131		b	1	6		2167.76
401.258	670.413	b7^1	P01887	B2m	VLVSLTGL	VLVSLTGL	2	5642.57	70.1131		b	1	7		2167.76
401.258	702.44	y7^1	P01887	B2m	VLVSLTGL	VLVSLTGL	2	441.861	70.1131		y	1	7		2167.76
401.263	102.055	b1^1	A2ASI5	Scn3a	TLVLSRI	TLVLSRI	2	6.87461	41.4108		b	1	1		1460.71
401.263	132.102	y1^1	A2ASI5	Scn3a	TLVLSRI	TLVLSRI	2	44.4747	41.4108		y	1	1		1460.71
401.263	215.139	b2^1	A2ASI5	Scn3a	TLVLSRI	TLVLSRI	2	1989.76	41.4108		b	1	2		1460.71
401.263	288.203	y2^1	A2ASI5	Scn3a	TLVLSRI	TLVLSRI	2	19.4517	41.4108		y	1	2		1460.71
401.263	294.197	y5^2	A2ASI5	Scn3a	TLVLSRI	TLVLSRI	2	128.174	41.4108		y	2	5		1460.71
401.263	314.207	b3^1	A2ASI5	Scn3a	TLVLSRI	TLVLSRI	2	434.682	41.4108		b	1	3		1460.71
401.263	335.716	b6^2	A2ASI5	Scn3a	TLVLSRI	TLVLSRI	2	47.7655	41.4108		b	2	6		1460.71
401.263	350.739	y6^2	A2ASI5	Scn3a	TLVLSRI	TLVLSRI	2	55.6172	41.4108		y	2	6		1460.71
401.263	375.235	y3^1	A2ASI5	Scn3a	TLVLSRI	TLVLSRI	2	632.862	41.4108		y	1	3		1460.71
401.263	427.291	b4^1	A2ASI5	Scn3a	TLVLSRI	TLVLSRI	2	112.496	41.4108		b	1	4		1460.71
401.263	488.319	y4^1	A2ASI5	Scn3a	TLVLSRI	TLVLSRI	2	2190.05	41.4108		y	1	4		1460.71
401.263	514.324	b5^1	A2ASI5	Scn3a	TLVLSRI	TLVLSRI	2	27.2194	41.4108		b	1	5		1460.71
401.263	587.388	y5^1	A2ASI5	Scn3a	TLVLSRI	TLVLSRI	2	10000	41.4108		y	1	5		1460.71
401.263	670.425	b6^1	A2ASI5	Scn3a	TLVLSRI	TLVLSRI	2	76.4805	41.4108		b	1	6		1460.71
401.263	700.472	y6^1	A2ASI5	Scn3a	TLVLSRI	TLVLSRI	2	90.4132	41.4108		y	1	6		1460.71
401.737	147.113	y1^1	P60335	Pcbp1	EVGSIIGK	EVGSIIGK	2	316.311	19.2666		y	1	1		914.271
401.737	204.134	y2^1	P60335	Pcbp1	EVGSIIGK	EVGSIIGK	2	4280.62	19.2666		y	1	2		914.271
401.737	229.118	b2^1	P60335	Pcbp1	EVGSIIGK	EVGSIIGK	2	403.925	19.2666		b	1	2		914.271
401.737	287.682	y6^2	P60335	Pcbp1	EVGSIIGK	EVGSIIGK	2	205.734	19.2666		y	2	6		914.271
401.737	317.218	y3^1	P60335	Pcbp1	EVGSIIGK	EVGSIIGK	2	2506.03	19.2666		y	1	3		914.271
401.737	430.302	y4^1	P60335	Pcbp1	EVGSIIGK	EVGSIIGK	2	2616.8	19.2666		y	1	4		914.271
401.737	517.334	y5^1	P60335	Pcbp1	EVGSIIGK	EVGSIIGK	2	1089.77	19.2666		y	1	5		914.271
401.737	574.356	y6^1	P60335	Pcbp1	EVGSIIGK	EVGSIIGK	2	10000	19.2666		y	1	6		914.271
401.737	673.424	y7^1	P60335	Pcbp1	EVGSIIGK	EVGSIIGK	2	157.386	19.2666		y	1	7		914.271
401.763	147.113	y1^1	P17368	VACWR027	LGPLFKK	LGPLFKK	2	62.5921	21.0877		y	1	1		949.845
401.763	171.113	b2^1	P17368	VACWR027	LGPLFKK	LGPLFKK	2	256.522	21.0877		b	1	2		949.845
401.763	268.166	b3^1	P17368	VACWR027	LGPLFKK	LGPLFKK	2	701.417	21.0877		b	1	3		949.845
401.763	275.208	y2^1	P17368	VACWR027	LGPLFKK	LGPLFKK	2	873.222	21.0877		y	1	2		949.845
401.763	316.71	y5^2	P17368	VACWR027	LGPLFKK	LGPLFKK	2	7879.78	21.0877		y	2	5		949.845
401.763	345.221	y6^2	P17368	VACWR027	LGPLFKK	LGPLFKK	2	2061.49	21.0877		y	2	6		949.845
401.763	381.25	b4^1	P17368	VACWR027	LGPLFKK	LGPLFKK	2	1451	21.0877		b	1	4		949.845
401.763	422.276	y3^1	P17368	VACWR027	LGPLFKK	LGPLFKK	2	763.535	21.0877		y	1	3		949.845
401.763	535.36	y4^1	P17368	VACWR027	LGPLFKK	LGPLFKK	2	5086.59	21.0877		y	1	4		949.845
401.763	632.413	y5^1	P17368	VACWR027	LGPLFKK	LGPLFKK	2	7682.71	21.0877		y	1	5		949.845
401.763	689.434	y6^1	P17368	VACWR027	LGPLFKK	LGPLFKK	2	10000	21.0877		y	1	6		949.845
402.203	132.102	y1^1	Q8BLQ7	Slc7a4	SIRNFTESHL	SIRN(UniMod:7)FTESHL	3	761.263	35.3069		y	1	1		1306.38
402.203	201.123	b2^1	Q8BLQ7	Slc7a4	SIRNFTESHL	SIRN(UniMod:7)FTESHL	3	946.169	35.3069		b	1	2		1306.38
402.203	236.629	b4^2	Q8BLQ7	Slc7a4	SIRNFTESHL	SIRN(UniMod:7)FTESHL	3	918.469	35.3069		b	2	4		1306.38
402.203	269.161	y2^1	Q8BLQ7	Slc7a4	SIRNFTESHL	SIRN(UniMod:7)FTESHL	3	2220.87	35.3069		y	1	2		1306.38
402.203	293.645	y5^2	Q8BLQ7	Slc7a4	SIRNFTESHL	SIRN(UniMod:7)FTESHL	3	1366.95	35.3069		y	2	5		1306.38
402.203	310.164	b5^2	Q8BLQ7	Slc7a4	SIRNFTESHL	SIRN(UniMod:7)FTESHL	3	1541.11	35.3069		b	2	5		1306.38
402.203	356.193	y3^1	Q8BLQ7	Slc7a4	SIRNFTESHL	SIRN(UniMod:7)FTESHL	3	3996.46	35.3069		y	1	3		1306.38
402.203	357.224	b3^1	Q8BLQ7	Slc7a4	SIRNFTESHL	SIRN(UniMod:7)FTESHL	3	246.712	35.3069		b	1	3		1306.38
402.203	360.687	b6^2	Q8BLQ7	Slc7a4	SIRNFTESHL	SIRN(UniMod:7)FTESHL	3	3346.76	35.3069		b	2	6		1306.38
402.203	472.251	b4^1	Q8BLQ7	Slc7a4	SIRNFTESHL	SIRN(UniMod:7)FTESHL	3	3729.7	35.3069		b	1	4		1306.38
402.203	485.235	y4^1	Q8BLQ7	Slc7a4	SIRNFTESHL	SIRN(UniMod:7)FTESHL	3	10000	35.3069		y	1	4		1306.38
402.203	502.743	y8^2	Q8BLQ7	Slc7a4	SIRNFTESHL	SIRN(UniMod:7)FTESHL	3	8731.66	35.3069		y	2	8		1306.38
402.203	537.254	b9^2	Q8BLQ7	Slc7a4	SIRNFTESHL	SIRN(UniMod:7)FTESHL	3	184.897	35.3069		b	2	9		1306.38
402.203	559.285	y9^2	Q8BLQ7	Slc7a4	SIRNFTESHL	SIRN(UniMod:7)FTESHL	3	2744	35.3069		y	2	9		1306.38
402.203	586.283	y5^1	Q8BLQ7	Slc7a4	SIRNFTESHL	SIRN(UniMod:7)FTESHL	3	5326.29	35.3069		y	1	5		1306.38
402.203	619.32	b5^1	Q8BLQ7	Slc7a4	SIRNFTESHL	SIRN(UniMod:7)FTESHL	3	6232.26	35.3069		b	1	5		1306.38
402.203	720.368	b6^1	Q8BLQ7	Slc7a4	SIRNFTESHL	SIRN(UniMod:7)FTESHL	3	1362.45	35.3069		b	1	6		1306.38
402.203	733.352	y6^1	Q8BLQ7	Slc7a4	SIRNFTESHL	SIRN(UniMod:7)FTESHL	3	432.044	35.3069		y	1	6		1306.38
402.204	172.072	b2^1	iRT-pepA		GNEQVTR	GNEQVTR	2	3263.81	-10.2187		b	1	2		321.36
402.204	175.119	y1^1	iRT-pepA		GNEQVTR	GNEQVTR	2	1684.49	-10.2187		y	1	1		321.36
402.204	252.15	y4^2	iRT-pepA		GNEQVTR	GNEQVTR	2	60.7185	-10.2187		y	2	4		321.36
402.204	276.167	y2^1	iRT-pepA		GNEQVTR	GNEQVTR	2	7402.92	-10.2187		y	1	2		321.36
402.204	301.114	b3^1	iRT-pepA		GNEQVTR	GNEQVTR	2	2489.24	-10.2187		b	1	3		321.36
402.204	315.148	b6^2	iRT-pepA		GNEQVTR	GNEQVTR	2	499.768	-10.2187		b	2	6		321.36
402.204	316.672	y5^2	iRT-pepA		GNEQVTR	GNEQVTR	2	714.475	-10.2187		y	2	5		321.36
402.204	373.693	y6^2	iRT-pepA		GNEQVTR	GNEQVTR	2	346.189	-10.2187		y	2	6		321.36
402.204	375.235	y3^1	iRT-pepA		GNEQVTR	GNEQVTR	2	9035.21	-10.2187		y	1	3		321.36
402.204	429.173	b4^1	iRT-pepA		GNEQVTR	GNEQVTR	2	634.46	-10.2187		b	1	4		321.36
402.204	503.294	y4^1	iRT-pepA		GNEQVTR	GNEQVTR	2	7024.61	-10.2187		y	1	4		321.36
402.204	528.241	b5^1	iRT-pepA		GNEQVTR	GNEQVTR	2	806.005	-10.2187		b	1	5		321.36
402.204	629.289	b6^1	iRT-pepA		GNEQVTR	GNEQVTR	2	586.817	-10.2187		b	1	6		321.36
402.204	632.336	y5^1	iRT-pepA		GNEQVTR	GNEQVTR	2	10000	-10.2187		y	1	5		321.36
402.219	132.102	y1^1	Q8BFV3	Dusp4	PSNLPYL	PSNLPYL	2	6081.93	56.397		y	1	1		1832.99
402.219	299.135	b3^1	Q8BFV3	Dusp4	PSNLPYL	PSNLPYL	2	335.483	56.397		b	1	3		1832.99
402.219	392.218	y3^1	Q8BFV3	Dusp4	PSNLPYL	PSNLPYL	2	3426.43	56.397		y	1	3		1832.99
402.219	412.219	b4^1	Q8BFV3	Dusp4	PSNLPYL	PSNLPYL	2	2895.6	56.397		b	1	4		1832.99
402.219	509.272	b5^1	Q8BFV3	Dusp4	PSNLPYL	PSNLPYL	2	7647.98	56.397		b	1	5		1832.99
402.219	672.335	b6^1	Q8BFV3	Dusp4	PSNLPYL	PSNLPYL	2	8628.09	56.397		b	1	6		1832.99
402.222	157.097	b2^1	Q08189	Tgm3	VGSTNRIG	VGSTNRIG	2	1300.33	-2.28782		b	1	2		387.427
402.222	173.092	b4^2	Q08189	Tgm3	VGSTNRIG	VGSTNRIG	2	44.9973	-2.28782		b	2	4		387.427
402.222	244.129	b3^1	Q08189	Tgm3	VGSTNRIG	VGSTNRIG	2	525.489	-2.28782		b	1	3		387.427
402.222	324.177	y6^2	Q08189	Tgm3	VGSTNRIG	VGSTNRIG	2	369.48	-2.28782		y	2	6		387.427
402.222	345.224	y3^1	Q08189	Tgm3	VGSTNRIG	VGSTNRIG	2	762.562	-2.28782		y	1	3		387.427
402.222	352.688	y7^2	Q08189	Tgm3	VGSTNRIG	VGSTNRIG	2	74.9358	-2.28782		y	2	7		387.427
402.222	364.706	b7^2	Q08189	Tgm3	VGSTNRIG	VGSTNRIG	2	631.399	-2.28782		b	2	7		387.427
402.222	459.267	y4^1	Q08189	Tgm3	VGSTNRIG	VGSTNRIG	2	415.347	-2.28782		y	1	4		387.427
402.222	560.315	y5^1	Q08189	Tgm3	VGSTNRIG	VGSTNRIG	2	2104.94	-2.28782		y	1	5		387.427
402.222	615.321	b6^1	Q08189	Tgm3	VGSTNRIG	VGSTNRIG	2	311.081	-2.28782		b	1	6		387.427
402.222	647.347	y6^1	Q08189	Tgm3	VGSTNRIG	VGSTNRIG	2	5221.19	-2.28782		y	1	6		387.427
402.222	704.369	y7^1	Q08189	Tgm3	VGSTNRIG	VGSTNRIG	2	10000	-2.28782		y	1	7		387.427
402.222	171.113	b2^1	Q8CIP4	Mark4	AVGSGSRGL	AVGSGSRGL	2	1876.66	6.83644		b	1	2		604.287
402.222	228.134	b3^1	Q8CIP4	Mark4	AVGSGSRGL	AVGSGSRGL	2	456.19	6.83644		b	1	3		604.287
402.222	308.164	b7^2	Q8CIP4	Mark4	AVGSGSRGL	AVGSGSRGL	2	82.8442	6.83644		b	2	7		604.287
402.222	315.166	b4^1	Q8CIP4	Mark4	AVGSGSRGL	AVGSGSRGL	2	720.517	6.83644		b	1	4		604.287
402.222	317.169	y7^2	Q8CIP4	Mark4	AVGSGSRGL	AVGSGSRGL	2	285.758	6.83644		y	2	7		604.287
402.222	372.188	b5^1	Q8CIP4	Mark4	AVGSGSRGL	AVGSGSRGL	2	218.506	6.83644		b	1	5		604.287
402.222	432.257	y4^1	Q8CIP4	Mark4	AVGSGSRGL	AVGSGSRGL	2	353.221	6.83644		y	1	4		604.287
402.222	489.278	y5^1	Q8CIP4	Mark4	AVGSGSRGL	AVGSGSRGL	2	3110.76	6.83644		y	1	5		604.287
402.222	576.31	y6^1	Q8CIP4	Mark4	AVGSGSRGL	AVGSGSRGL	2	657.095	6.83644		y	1	6		604.287
402.222	615.321	b7^1	Q8CIP4	Mark4	AVGSGSRGL	AVGSGSRGL	2	234.127	6.83644		b	1	7		604.287
402.222	633.331	y7^1	Q8CIP4	Mark4	AVGSGSRGL	AVGSGSRGL	2	10000	6.83644		y	1	7		604.287
402.226	118.086	y1^1	P16272	LIG	GAKGGIMAV	GAKGGIMAV	2	3008.6	22.0932		y	1	1		966.218
402.226	129.066	b2^1	P16272	LIG	GAKGGIMAV	GAKGGIMAV	2	152.457	22.0932		b	1	2		966.218
402.226	129.084	b3^2	P16272	LIG	GAKGGIMAV	GAKGGIMAV	2	4.02591	22.0932		b	2	3		966.218
402.226	189.123	y2^1	P16272	LIG	GAKGGIMAV	GAKGGIMAV	2	2697.18	22.0932		y	1	2		966.218
402.226	242.648	b6^2	P16272	LIG	GAKGGIMAV	GAKGGIMAV	2	14.4304	22.0932		b	2	6		966.218
402.226	257.161	b3^1	P16272	LIG	GAKGGIMAV	GAKGGIMAV	2	155.861	22.0932		b	1	3		966.218
402.226	308.168	b7^2	P16272	LIG	GAKGGIMAV	GAKGGIMAV	2	288.453	22.0932		b	2	7		966.218
402.226	314.182	b4^1	P16272	LIG	GAKGGIMAV	GAKGGIMAV	2	65.142	22.0932		b	1	4		966.218
402.226	320.164	y3^1	P16272	LIG	GAKGGIMAV	GAKGGIMAV	2	437.036	22.0932		y	1	3		966.218
402.226	343.686	b8^2	P16272	LIG	GAKGGIMAV	GAKGGIMAV	2	1439.22	22.0932		b	2	8		966.218
402.226	371.204	b5^1	P16272	LIG	GAKGGIMAV	GAKGGIMAV	2	183.161	22.0932		b	1	5		966.218
402.226	433.248	y4^1	P16272	LIG	GAKGGIMAV	GAKGGIMAV	2	17.3855	22.0932		y	1	4		966.218
402.226	484.288	b6^1	P16272	LIG	GAKGGIMAV	GAKGGIMAV	2	2622.58	22.0932		b	1	6		966.218
402.226	490.269	y5^1	P16272	LIG	GAKGGIMAV	GAKGGIMAV	2	2.80215	22.0932		y	1	5		966.218
402.226	547.291	y6^1	P16272	LIG	GAKGGIMAV	GAKGGIMAV	2	145.781	22.0932		y	1	6		966.218
402.226	615.328	b7^1	P16272	LIG	GAKGGIMAV	GAKGGIMAV	2	8440.34	22.0932		b	1	7		966.218
402.226	675.386	y7^1	P16272	LIG	GAKGGIMAV	GAKGGIMAV	2	694.744	22.0932		y	1	7		966.218
402.226	686.365	b8^1	P16272	LIG	GAKGGIMAV	GAKGGIMAV	2	10000	22.0932		b	1	8		966.218
402.247	118.086	y1^1	Q9QUK6	Tlr4	SVIVVSTV	SVIVVSTV	2	4021.02	45.7611		y	1	1		1568.88
402.247	187.108	b2^1	Q9QUK6	Tlr4	SVIVVSTV	SVIVVSTV	2	5105.64	45.7611		b	1	2		1568.88
402.247	219.134	y2^1	Q9QUK6	Tlr4	SVIVVSTV	SVIVVSTV	2	3792.23	45.7611		y	1	2		1568.88
402.247	300.192	b3^1	Q9QUK6	Tlr4	SVIVVSTV	SVIVVSTV	2	6442.1	45.7611		b	1	3		1568.88
402.247	306.166	y3^1	Q9QUK6	Tlr4	SVIVVSTV	SVIVVSTV	2	2487.33	45.7611		y	1	3		1568.88
402.247	399.26	b4^1	Q9QUK6	Tlr4	SVIVVSTV	SVIVVSTV	2	6704.67	45.7611		b	1	4		1568.88
402.247	405.234	y4^1	Q9QUK6	Tlr4	SVIVVSTV	SVIVVSTV	2	1222.64	45.7611		y	1	4		1568.88
402.247	498.329	b5^1	Q9QUK6	Tlr4	SVIVVSTV	SVIVVSTV	2	7256.96	45.7611		b	1	5		1568.88
402.247	504.303	y5^1	Q9QUK6	Tlr4	SVIVVSTV	SVIVVSTV	2	559.657	45.7611		y	1	5		1568.88
402.247	585.361	b6^1	Q9QUK6	Tlr4	SVIVVSTV	SVIVVSTV	2	3028.51	45.7611		b	1	6		1568.88
402.247	617.387	y6^1	Q9QUK6	Tlr4	SVIVVSTV	SVIVVSTV	2	2419.63	45.7611		y	1	6		1568.88
402.247	686.408	b7^1	Q9QUK6	Tlr4	SVIVVSTV	SVIVVSTV	2	1200.58	45.7611		b	1	7		1568.88
402.247	132.102	y1^1	P57791	Rce1	SVLVVSSL	SVLVVSSL	2	5037.2	59.1256		y	1	1		1900.21
402.247	187.108	b2^1	P57791	Rce1	SVLVVSSL	SVLVVSSL	2	10000	59.1256		b	1	2		1900.21
402.247	219.134	y2^1	P57791	Rce1	SVLVVSSL	SVLVVSSL	2	1187.11	59.1256		y	1	2		1900.21
402.247	300.192	b3^1	P57791	Rce1	SVLVVSSL	SVLVVSSL	2	8498.16	59.1256		b	1	3		1900.21
402.247	306.166	y3^1	P57791	Rce1	SVLVVSSL	SVLVVSSL	2	2219.01	59.1256		y	1	3		1900.21
402.247	399.26	b4^1	P57791	Rce1	SVLVVSSL	SVLVVSSL	2	5589.68	59.1256		b	1	4		1900.21
402.247	405.234	y4^1	P57791	Rce1	SVLVVSSL	SVLVVSSL	2	2703.06	59.1256		y	1	4		1900.21
402.247	498.329	b5^1	P57791	Rce1	SVLVVSSL	SVLVVSSL	2	1082.43	59.1256		b	1	5		1900.21
402.734	229.155	y2^1	P70186	Epyc	DHIPLPL	DHIPLPL	2	9492.21	64.8718		y	1	2		2041.65
402.734	253.093	b2^1	P70186	Epyc	DHIPLPL	DHIPLPL	2	1228.19	64.8718		b	1	2		2041.65
402.734	337.187	b6^2	P70186	Epyc	DHIPLPL	DHIPLPL	2	3355.39	64.8718		b	2	6		2041.65
402.734	366.177	b3^1	P70186	Epyc	DHIPLPL	DHIPLPL	2	1849.27	64.8718		b	1	3		2041.65
402.734	463.23	b4^1	P70186	Epyc	DHIPLPL	DHIPLPL	2	836.768	64.8718		b	1	4		2041.65
402.734	576.314	b5^1	P70186	Epyc	DHIPLPL	DHIPLPL	2	10000	64.8718		b	1	5		2041.65
402.878	129.102	b1^1	P26638	Sars1	KYSHVDLVVM	KYSHVDLVVM(UniMod:35)	3	200.047	28.6925		b	1	1		1122.22
402.878	166.053	y1^1	P26638	Sars1	KYSHVDLVVM	KYSHVDLVVM(UniMod:35)	3	9738.75	28.6925		y	1	1		1122.22
402.878	265.122	y2^1	P26638	Sars1	KYSHVDLVVM	KYSHVDLVVM(UniMod:35)	3	2995.79	28.6925		y	1	2		1122.22
402.878	365.68	b6^2	P26638	Sars1	KYSHVDLVVM	KYSHVDLVVM(UniMod:35)	3	345.1	28.6925		b	2	6		1122.22
402.878	422.222	b7^2	P26638	Sars1	KYSHVDLVVM	KYSHVDLVVM(UniMod:35)	3	3029.87	28.6925		b	2	7		1122.22
402.878	471.756	b8^2	P26638	Sars1	KYSHVDLVVM	KYSHVDLVVM(UniMod:35)	3	10000	28.6925		b	2	8		1122.22
402.878	516.257	b4^1	P26638	Sars1	KYSHVDLVVM	KYSHVDLVVM(UniMod:35)	3	840.08	28.6925		b	1	4		1122.22
402.878	521.29	b9^2	P26638	Sars1	KYSHVDLVVM	KYSHVDLVVM(UniMod:35)	3	8341.19	28.6925		b	2	9		1122.22
402.878	615.325	b5^1	P26638	Sars1	KYSHVDLVVM	KYSHVDLVVM(UniMod:35)	3	545.922	28.6925		b	1	5		1122.22
402.878	730.352	b6^1	P26638	Sars1	KYSHVDLVVM	KYSHVDLVVM(UniMod:35)	3	642.35	28.6925		b	1	6		1122.22
402.878	843.436	b7^1	P26638	Sars1	KYSHVDLVVM	KYSHVDLVVM(UniMod:35)	3	4716.95	28.6925		b	1	7		1122.22
402.878	942.504	b8^1	P26638	Sars1	KYSHVDLVVM	KYSHVDLVVM(UniMod:35)	3	8269.92	28.6925		b	1	8		1122.22
402.912	187.108	b2^1	P62874	Gnb1	VSFSKSGRLLL	VSFSKSGRLLL	3	949.445	43.02		b	1	2		1502.3
402.912	329.716	y6^2	P62874	Gnb1	VSFSKSGRLLL	VSFSKSGRLLL	3	41.6159	43.02		y	2	6		1502.3
402.912	393.763	y7^2	P62874	Gnb1	VSFSKSGRLLL	VSFSKSGRLLL	3	129.939	43.02		y	2	7		1502.3
402.912	437.279	y8^2	P62874	Gnb1	VSFSKSGRLLL	VSFSKSGRLLL	3	934.549	43.02		y	2	8		1502.3
402.912	510.814	y9^2	P62874	Gnb1	VSFSKSGRLLL	VSFSKSGRLLL	3	4382.57	43.02		y	2	9		1502.3
402.912	549.303	b5^1	P62874	Gnb1	VSFSKSGRLLL	VSFSKSGRLLL	3	107.431	43.02		b	1	5		1502.3
402.912	554.33	y10^2	P62874	Gnb1	VSFSKSGRLLL	VSFSKSGRLLL	3	10000	43.02		y	2	10		1502.3
402.912	571.393	y5^1	P62874	Gnb1	VSFSKSGRLLL	VSFSKSGRLLL	3	356.092	43.02		y	1	5		1502.3
402.912	658.425	y6^1	P62874	Gnb1	VSFSKSGRLLL	VSFSKSGRLLL	3	1594.14	43.02		y	1	6		1502.3
402.912	786.52	y7^1	P62874	Gnb1	VSFSKSGRLLL	VSFSKSGRLLL	3	263.988	43.02		y	1	7		1502.3
402.912	873.552	y8^1	P62874	Gnb1	VSFSKSGRLLL	VSFSKSGRLLL	3	619.326	43.02		y	1	8		1502.3
403.215	129.102	b1^1	Q9D0E1	Hnrnpm	KGIGMGNL	KGIGM(UniMod:35)GNL	2	426.725	12.2092		b	1	1		708.914
403.215	132.102	y1^1	Q9D0E1	Hnrnpm	KGIGMGNL	KGIGM(UniMod:35)GNL	2	1520.46	12.2092		y	1	1		708.914
403.215	186.124	b2^1	Q9D0E1	Hnrnpm	KGIGMGNL	KGIGM(UniMod:35)GNL	2	229.42	12.2092		b	1	2		708.914
403.215	246.145	y2^1	Q9D0E1	Hnrnpm	KGIGMGNL	KGIGM(UniMod:35)GNL	2	175.885	12.2092		y	1	2		708.914
403.215	252.136	b5^2	Q9D0E1	Hnrnpm	KGIGMGNL	KGIGM(UniMod:35)GNL	2	71.2055	12.2092		b	2	5		708.914
403.215	280.647	b6^2	Q9D0E1	Hnrnpm	KGIGMGNL	KGIGM(UniMod:35)GNL	2	159.637	12.2092		b	2	6		708.914
403.215	299.208	b3^1	Q9D0E1	Hnrnpm	KGIGMGNL	KGIGM(UniMod:35)GNL	2	1241.09	12.2092		b	1	3		708.914
403.215	303.166	y3^1	Q9D0E1	Hnrnpm	KGIGMGNL	KGIGM(UniMod:35)GNL	2	117.119	12.2092		y	1	3		708.914
403.215	337.668	b7^2	Q9D0E1	Hnrnpm	KGIGMGNL	KGIGM(UniMod:35)GNL	2	916.732	12.2092		b	2	7		708.914
403.215	356.229	b4^1	Q9D0E1	Hnrnpm	KGIGMGNL	KGIGM(UniMod:35)GNL	2	264.491	12.2092		b	1	4		708.914
403.215	503.265	b5^1	Q9D0E1	Hnrnpm	KGIGMGNL	KGIGM(UniMod:35)GNL	2	1571.87	12.2092		b	1	5		708.914
403.215	507.223	y5^1	Q9D0E1	Hnrnpm	KGIGMGNL	KGIGM(UniMod:35)GNL	2	833.195	12.2092		y	1	5		708.914
403.215	560.286	b6^1	Q9D0E1	Hnrnpm	KGIGMGNL	KGIGM(UniMod:35)GNL	2	1777.94	12.2092		b	1	6		708.914
403.215	674.329	b7^1	Q9D0E1	Hnrnpm	KGIGMGNL	KGIGM(UniMod:35)GNL	2	10000	12.2092		b	1	7		708.914
403.219	132.102	y1^1	P68438	RAP94	DSKETIL	DSKETIL	2	4692.1	22.2054		y	1	1		967.97
403.219	203.066	b2^1	P68438	RAP94	DSKETIL	DSKETIL	2	200.636	22.2054		b	1	2		967.97
403.219	245.186	y2^1	P68438	RAP94	DSKETIL	DSKETIL	2	181.221	22.2054		y	1	2		967.97
403.219	281.129	b5^2	P68438	RAP94	DSKETIL	DSKETIL	2	106.295	22.2054		b	2	5		967.97
403.219	331.161	b3^1	P68438	RAP94	DSKETIL	DSKETIL	2	183.781	22.2054		b	1	3		967.97
403.219	460.204	b4^1	P68438	RAP94	DSKETIL	DSKETIL	2	578.781	22.2054		b	1	4		967.97
403.219	561.251	b5^1	P68438	RAP94	DSKETIL	DSKETIL	2	3456.09	22.2054		b	1	5		967.97
403.219	603.371	y5^1	P68438	RAP94	DSKETIL	DSKETIL	2	1023.06	22.2054		y	1	5		967.97
403.219	674.336	b6^1	P68438	RAP94	DSKETIL	DSKETIL	2	10000	22.2054		b	1	6		967.97
403.219	690.403	y6^1	P68438	RAP94	DSKETIL	DSKETIL	2	36.8014	22.2054		y	1	6		967.97
403.219	157.097	b2^1	P16858	Gapdh	VGVNGFGR	VGVNGFGR	2	1094.76	19.2129		b	1	2		913.028
403.219	175.119	y1^1	P16858	Gapdh	VGVNGFGR	VGVNGFGR	2	68.9747	19.2129		y	1	1		913.028
403.219	214.119	b5^2	P16858	Gapdh	VGVNGFGR	VGVNGFGR	2	275.031	19.2129		b	2	5		913.028
403.219	232.14	y2^1	P16858	Gapdh	VGVNGFGR	VGVNGFGR	2	317.658	19.2129		y	1	2		913.028
403.219	256.166	b3^1	P16858	Gapdh	VGVNGFGR	VGVNGFGR	2	520.758	19.2129		b	1	3		913.028
403.219	325.174	y6^2	P16858	Gapdh	VGVNGFGR	VGVNGFGR	2	749.072	19.2129		y	2	6		913.028
403.219	353.685	y7^2	P16858	Gapdh	VGVNGFGR	VGVNGFGR	2	332.686	19.2129		y	2	7		913.028
403.219	370.208	b4^1	P16858	Gapdh	VGVNGFGR	VGVNGFGR	2	294.784	19.2129		b	1	4		913.028
403.219	379.209	y3^1	P16858	Gapdh	VGVNGFGR	VGVNGFGR	2	931.955	19.2129		y	1	3		913.028
403.219	427.23	b5^1	P16858	Gapdh	VGVNGFGR	VGVNGFGR	2	182.822	19.2129		b	1	5		913.028
403.219	436.23	y4^1	P16858	Gapdh	VGVNGFGR	VGVNGFGR	2	3787.11	19.2129		y	1	4		913.028
403.219	550.273	y5^1	P16858	Gapdh	VGVNGFGR	VGVNGFGR	2	10000	19.2129		y	1	5		913.028
403.219	574.298	b6^1	P16858	Gapdh	VGVNGFGR	VGVNGFGR	2	52.9912	19.2129		b	1	6		913.028
403.219	649.342	y6^1	P16858	Gapdh	VGVNGFGR	VGVNGFGR	2	3087.03	19.2129		y	1	6		913.028
403.219	706.363	y7^1	P16858	Gapdh	VGVNGFGR	VGVNGFGR	2	8286.46	19.2129		y	1	7		913.028
403.226	132.102	y1^1	Q8K3Z9	Pom121	SAPLFTGL	SAPLFTGL	2	6226.16	66.4506		y	1	1		2081.17
403.226	159.076	b2^1	Q8K3Z9	Pom121	SAPLFTGL	SAPLFTGL	2	3529.92	66.4506		b	1	2		2081.17
403.226	189.123	y2^1	Q8K3Z9	Pom121	SAPLFTGL	SAPLFTGL	2	3706.06	66.4506		y	1	2		2081.17
403.226	256.129	b3^1	Q8K3Z9	Pom121	SAPLFTGL	SAPLFTGL	2	1522.2	66.4506		b	1	3		2081.17
403.226	290.171	y3^1	Q8K3Z9	Pom121	SAPLFTGL	SAPLFTGL	2	2569.96	66.4506		y	1	3		2081.17
403.226	369.213	b4^1	Q8K3Z9	Pom121	SAPLFTGL	SAPLFTGL	2	1827.58	66.4506		b	1	4		2081.17
403.226	437.239	y4^1	Q8K3Z9	Pom121	SAPLFTGL	SAPLFTGL	2	1234.45	66.4506		y	1	4		2081.17
403.226	516.282	b5^1	Q8K3Z9	Pom121	SAPLFTGL	SAPLFTGL	2	5067.5	66.4506		b	1	5		2081.17
403.226	617.329	b6^1	Q8K3Z9	Pom121	SAPLFTGL	SAPLFTGL	2	2376.78	66.4506		b	1	6		2081.17
403.226	647.376	y6^1	Q8K3Z9	Pom121	SAPLFTGL	SAPLFTGL	2	10000	66.4506		y	1	6		2081.17
403.226	674.351	b7^1	Q8K3Z9	Pom121	SAPLFTGL	SAPLFTGL	2	4655.94	66.4506		b	1	7		2081.17
403.245	129.066	b2^1	Q9WVC3	Cav2	AGILFATL	AGILFATL	2	1909.33	80.456		b	1	2		2427.84
403.245	132.102	y1^1	Q9WVC3	Cav2	AGILFATL	AGILFATL	2	5602.12	80.456		y	1	1		2427.84
403.245	233.15	y2^1	Q9WVC3	Cav2	AGILFATL	AGILFATL	2	7758.57	80.456		y	1	2		2427.84
403.245	242.15	b3^1	Q9WVC3	Cav2	AGILFATL	AGILFATL	2	5956.3	80.456		b	1	3		2427.84
403.245	304.187	y3^1	Q9WVC3	Cav2	AGILFATL	AGILFATL	2	4167.51	80.456		y	1	3		2427.84
403.245	337.697	b7^2	Q9WVC3	Cav2	AGILFATL	AGILFATL	2	239.947	80.456		b	2	7		2427.84
403.245	355.234	b4^1	Q9WVC3	Cav2	AGILFATL	AGILFATL	2	3934.08	80.456		b	1	4		2427.84
403.245	451.255	y4^1	Q9WVC3	Cav2	AGILFATL	AGILFATL	2	4636.1	80.456		y	1	4		2427.84
403.245	502.302	b5^1	Q9WVC3	Cav2	AGILFATL	AGILFATL	2	10000	80.456		b	1	5		2427.84
403.245	564.339	y5^1	Q9WVC3	Cav2	AGILFATL	AGILFATL	2	717.865	80.456		y	1	5		2427.84
403.245	573.34	b6^1	Q9WVC3	Cav2	AGILFATL	AGILFATL	2	5337.39	80.456		b	1	6		2427.84
403.245	674.387	b7^1	Q9WVC3	Cav2	AGILFATL	AGILFATL	2	3986.65	80.456		b	1	7		2427.84
403.245	132.102	y1^1	Q7TSG2	Ctdp1	VAVIFSGL	VAVIFSGL	2	6334.54	73.7025		y	1	1		2261.72
403.245	171.113	b2^1	Q7TSG2	Ctdp1	VAVIFSGL	VAVIFSGL	2	3568.46	73.7025		b	1	2		2261.72
403.245	189.123	y2^1	Q7TSG2	Ctdp1	VAVIFSGL	VAVIFSGL	2	6573.55	73.7025		y	1	2		2261.72
403.245	265.67	b5^2	Q7TSG2	Ctdp1	VAVIFSGL	VAVIFSGL	2	35.174	73.7025		b	2	5		2261.72
403.245	270.181	b3^1	Q7TSG2	Ctdp1	VAVIFSGL	VAVIFSGL	2	6262.85	73.7025		b	1	3		2261.72
403.245	276.155	y3^1	Q7TSG2	Ctdp1	VAVIFSGL	VAVIFSGL	2	4461.49	73.7025		y	1	3		2261.72
403.245	309.187	b6^2	Q7TSG2	Ctdp1	VAVIFSGL	VAVIFSGL	2	113.836	73.7025		b	2	6		2261.72
403.245	337.697	b7^2	Q7TSG2	Ctdp1	VAVIFSGL	VAVIFSGL	2	257.585	73.7025		b	2	7		2261.72
403.245	383.265	b4^1	Q7TSG2	Ctdp1	VAVIFSGL	VAVIFSGL	2	5710.52	73.7025		b	1	4		2261.72
403.245	423.224	y4^1	Q7TSG2	Ctdp1	VAVIFSGL	VAVIFSGL	2	10000	73.7025		y	1	4		2261.72
403.245	530.334	b5^1	Q7TSG2	Ctdp1	VAVIFSGL	VAVIFSGL	2	3682.7	73.7025		b	1	5		2261.72
403.245	536.308	y5^1	Q7TSG2	Ctdp1	VAVIFSGL	VAVIFSGL	2	1469.14	73.7025		y	1	5		2261.72
403.245	617.366	b6^1	Q7TSG2	Ctdp1	VAVIFSGL	VAVIFSGL	2	2954.02	73.7025		b	1	6		2261.72
403.245	635.376	y6^1	Q7TSG2	Ctdp1	VAVIFSGL	VAVIFSGL	2	1092.61	73.7025		y	1	6		2261.72
403.245	674.387	b7^1	Q7TSG2	Ctdp1	VAVIFSGL	VAVIFSGL	2	6710.96	73.7025		b	1	7		2261.72
403.245	706.413	y7^1	Q7TSG2	Ctdp1	VAVIFSGL	VAVIFSGL	2	435.24	73.7025		y	1	7		2261.72
403.245	134.045	y1^1	P62274	Rps29	IGFIKLD	IGFIKLD	2	222.924	52.5904		y	1	1		1738.21
403.245	171.113	b2^1	P62274	Rps29	IGFIKLD	IGFIKLD	2	1332.17	52.5904		b	1	2		1738.21
403.245	247.129	y2^1	P62274	Rps29	IGFIKLD	IGFIKLD	2	228.436	52.5904		y	1	2		1738.21
403.245	318.181	b3^1	P62274	Rps29	IGFIKLD	IGFIKLD	2	1158.67	52.5904		b	1	3		1738.21
403.245	318.192	y5^2	P62274	Rps29	IGFIKLD	IGFIKLD	2	982.822	52.5904		y	2	5		1738.21
403.245	375.224	y3^1	P62274	Rps29	IGFIKLD	IGFIKLD	2	1370	52.5904		y	1	3		1738.21
403.245	431.265	b4^1	P62274	Rps29	IGFIKLD	IGFIKLD	2	423.028	52.5904		b	1	4		1738.21
403.245	488.308	y4^1	P62274	Rps29	IGFIKLD	IGFIKLD	2	1362.93	52.5904		y	1	4		1738.21
403.245	559.36	b5^1	P62274	Rps29	IGFIKLD	IGFIKLD	2	1145.59	52.5904		b	1	5		1738.21
403.245	635.376	y5^1	P62274	Rps29	IGFIKLD	IGFIKLD	2	3114.52	52.5904		y	1	5		1738.21
403.245	672.444	b6^1	P62274	Rps29	IGFIKLD	IGFIKLD	2	346.337	52.5904		b	1	6		1738.21
403.245	692.398	y6^1	P62274	Rps29	IGFIKLD	IGFIKLD	2	10000	52.5904		y	1	6		1738.21
403.246	118.086	y1^1	Q689Z5	Sbno1	IVMKSIV	IVM(UniMod:35)KSIV	2	509.342	36.6991		y	1	1		1337.3
403.246	213.16	b2^1	Q689Z5	Sbno1	IVMKSIV	IVM(UniMod:35)KSIV	2	2976.16	36.6991		b	1	2		1337.3
403.246	231.17	y2^1	Q689Z5	Sbno1	IVMKSIV	IVM(UniMod:35)KSIV	2	114.292	36.6991		y	1	2		1337.3
403.246	346.704	y6^2	Q689Z5	Sbno1	IVMKSIV	IVM(UniMod:35)KSIV	2	936.264	36.6991		y	2	6		1337.3
403.246	360.195	b3^1	Q689Z5	Sbno1	IVMKSIV	IVM(UniMod:35)KSIV	2	867.984	36.6991		b	1	3		1337.3
403.246	446.297	y4^1	Q689Z5	Sbno1	IVMKSIV	IVM(UniMod:35)KSIV	2	134.784	36.6991		y	1	4		1337.3
403.246	488.29	b4^1	Q689Z5	Sbno1	IVMKSIV	IVM(UniMod:35)KSIV	2	220.548	36.6991		b	1	4		1337.3
403.246	575.322	b5^1	Q689Z5	Sbno1	IVMKSIV	IVM(UniMod:35)KSIV	2	846.985	36.6991		b	1	5		1337.3
403.246	593.333	y5^1	Q689Z5	Sbno1	IVMKSIV	IVM(UniMod:35)KSIV	2	10000	36.6991		y	1	5		1337.3
403.246	692.401	y6^1	Q689Z5	Sbno1	IVMKSIV	IVM(UniMod:35)KSIV	2	3136.56	36.6991		y	1	6		1337.3
403.25	213.16	b2^1	P07742	Rrm1	IVNPHLL	IVNPHLL	2	1699.36	37.0322		b	1	2		1346.57
403.25	327.203	b3^1	P07742	Rrm1	IVNPHLL	IVNPHLL	2	508.207	37.0322		b	1	3		1346.57
403.25	382.245	y3^1	P07742	Rrm1	IVNPHLL	IVNPHLL	2	3194.84	37.0322		y	1	3		1346.57
403.25	479.298	y4^1	P07742	Rrm1	IVNPHLL	IVNPHLL	2	1431.01	37.0322		y	1	4		1346.57
403.25	561.314	b5^1	P07742	Rrm1	IVNPHLL	IVNPHLL	2	1521.44	37.0322		b	1	5		1346.57
403.25	593.341	y5^1	P07742	Rrm1	IVNPHLL	IVNPHLL	2	10000	37.0322		y	1	5		1346.57
403.25	692.409	y6^1	P07742	Rrm1	IVNPHLL	IVNPHLL	2	1735.06	37.0322		y	1	6		1346.57
403.706	115.05	b1^1	Q80U93	Nup214	NAPTFGSL	NAPTFGSL	2	184.327	47.5303		b	1	1		1611.52
403.706	132.102	y1^1	Q80U93	Nup214	NAPTFGSL	NAPTFGSL	2	6940.78	47.5303		y	1	1		1611.52
403.706	186.087	b2^1	Q80U93	Nup214	NAPTFGSL	NAPTFGSL	2	3992.51	47.5303		b	1	2		1611.52
403.706	219.134	y2^1	Q80U93	Nup214	NAPTFGSL	NAPTFGSL	2	3261.6	47.5303		y	1	2		1611.52
403.706	266.132	b5^2	Q80U93	Nup214	NAPTFGSL	NAPTFGSL	2	96.3742	47.5303		b	2	5		1611.52
403.706	276.155	y3^1	Q80U93	Nup214	NAPTFGSL	NAPTFGSL	2	1719.85	47.5303		y	1	3		1611.52
403.706	283.14	b3^1	Q80U93	Nup214	NAPTFGSL	NAPTFGSL	2	464.2	47.5303		b	1	3		1611.52
403.706	294.642	b6^2	Q80U93	Nup214	NAPTFGSL	NAPTFGSL	2	59.1857	47.5303		b	2	6		1611.52
403.706	311.166	y6^2	Q80U93	Nup214	NAPTFGSL	NAPTFGSL	2	139.379	47.5303		y	2	6		1611.52
403.706	338.158	b7^2	Q80U93	Nup214	NAPTFGSL	NAPTFGSL	2	612.464	47.5303		b	2	7		1611.52
403.706	384.188	b4^1	Q80U93	Nup214	NAPTFGSL	NAPTFGSL	2	1165.87	47.5303		b	1	4		1611.52
403.706	423.224	y4^1	Q80U93	Nup214	NAPTFGSL	NAPTFGSL	2	1954.82	47.5303		y	1	4		1611.52
403.706	524.271	y5^1	Q80U93	Nup214	NAPTFGSL	NAPTFGSL	2	302.369	47.5303		y	1	5		1611.52
403.706	531.256	b5^1	Q80U93	Nup214	NAPTFGSL	NAPTFGSL	2	2190.05	47.5303		b	1	5		1611.52
403.706	588.278	b6^1	Q80U93	Nup214	NAPTFGSL	NAPTFGSL	2	4108.91	47.5303		b	1	6		1611.52
403.706	621.324	y6^1	Q80U93	Nup214	NAPTFGSL	NAPTFGSL	2	7871.41	47.5303		y	1	6		1611.52
403.706	675.31	b7^1	Q80U93	Nup214	NAPTFGSL	NAPTFGSL	2	10000	47.5303		b	1	7		1611.52
403.706	692.361	y7^1	Q80U93	Nup214	NAPTFGSL	NAPTFGSL	2	315.753	47.5303		y	1	7		1611.52
403.707	147.113	y1^1	Q61937	Npm1	MQASIEK	MQASIEK	2	375.927	4.27925		y	1	1		540.117
403.707	260.106	b2^1	Q61937	Npm1	MQASIEK	MQASIEK	2	2977.24	4.27925		b	1	2		540.117
403.707	276.155	y2^1	Q61937	Npm1	MQASIEK	MQASIEK	2	305.64	4.27925		y	1	2		540.117
403.707	331.143	b3^1	Q61937	Npm1	MQASIEK	MQASIEK	2	111.563	4.27925		b	1	3		540.117
403.707	338.187	y6^2	Q61937	Npm1	MQASIEK	MQASIEK	2	225.486	4.27925		y	2	6		540.117
403.707	389.239	y3^1	Q61937	Npm1	MQASIEK	MQASIEK	2	430.061	4.27925		y	1	3		540.117
403.707	476.271	y4^1	Q61937	Npm1	MQASIEK	MQASIEK	2	1293.35	4.27925		y	1	4		540.117
403.707	547.309	y5^1	Q61937	Npm1	MQASIEK	MQASIEK	2	10000	4.27925		y	1	5		540.117
403.707	675.367	y6^1	Q61937	Npm1	MQASIEK	MQASIEK	2	5762.22	4.27925		y	1	6		540.117
403.724	132.102	y1^1	Q5SSH7	Zzef1	VNATFAAL	VNATFAAL	2	6678.03	52.2873		y	1	1		1730.59
403.724	203.139	y2^1	Q5SSH7	Zzef1	VNATFAAL	VNATFAAL	2	2770.07	52.2873		y	1	2		1730.59
403.724	214.119	b2^1	Q5SSH7	Zzef1	VNATFAAL	VNATFAAL	2	174.018	52.2873		b	1	2		1730.59
403.724	285.156	b3^1	Q5SSH7	Zzef1	VNATFAAL	VNATFAAL	2	175	52.2873		b	1	3		1730.59
403.724	338.177	b7^2	Q5SSH7	Zzef1	VNATFAAL	VNATFAAL	2	1574.61	52.2873		b	2	7		1730.59
403.724	386.203	b4^1	Q5SSH7	Zzef1	VNATFAAL	VNATFAAL	2	136.886	52.2873		b	1	4		1730.59
403.724	421.245	y4^1	Q5SSH7	Zzef1	VNATFAAL	VNATFAAL	2	251.054	52.2873		y	1	4		1730.59
403.724	533.272	b5^1	Q5SSH7	Zzef1	VNATFAAL	VNATFAAL	2	2032.22	52.2873		b	1	5		1730.59
403.724	604.309	b6^1	Q5SSH7	Zzef1	VNATFAAL	VNATFAAL	2	2000.48	52.2873		b	1	6		1730.59
403.724	675.346	b7^1	Q5SSH7	Zzef1	VNATFAAL	VNATFAAL	2	10000	52.2873		b	1	7		1730.59
403.724	132.102	y1^1	Q9JJT0	Rcl1	VGIGFSNL	VGIGFSNL	2	2858.96	62.3884		y	1	1		1979.66
403.724	157.097	b2^1	Q9JJT0	Rcl1	VGIGFSNL	VGIGFSNL	2	1199.89	62.3884		b	1	2		1979.66
403.724	246.145	y2^1	Q9JJT0	Rcl1	VGIGFSNL	VGIGFSNL	2	1527.37	62.3884		y	1	2		1979.66
403.724	270.181	b3^1	Q9JJT0	Rcl1	VGIGFSNL	VGIGFSNL	2	774.139	62.3884		b	1	3		1979.66
403.724	281.155	b6^2	Q9JJT0	Rcl1	VGIGFSNL	VGIGFSNL	2	255.81	62.3884		b	2	6		1979.66
403.724	325.679	y6^2	Q9JJT0	Rcl1	VGIGFSNL	VGIGFSNL	2	14.8972	62.3884		y	2	6		1979.66
403.724	327.203	b4^1	Q9JJT0	Rcl1	VGIGFSNL	VGIGFSNL	2	1838.29	62.3884		b	1	4		1979.66
403.724	333.177	y3^1	Q9JJT0	Rcl1	VGIGFSNL	VGIGFSNL	2	5294.36	62.3884		y	1	3		1979.66
403.724	338.177	b7^2	Q9JJT0	Rcl1	VGIGFSNL	VGIGFSNL	2	136.06	62.3884		b	2	7		1979.66
403.724	474.271	b5^1	Q9JJT0	Rcl1	VGIGFSNL	VGIGFSNL	2	10000	62.3884		b	1	5		1979.66
403.724	480.245	y4^1	Q9JJT0	Rcl1	VGIGFSNL	VGIGFSNL	2	330.108	62.3884		y	1	4		1979.66
403.724	537.267	y5^1	Q9JJT0	Rcl1	VGIGFSNL	VGIGFSNL	2	672.486	62.3884		y	1	5		1979.66
403.724	561.303	b6^1	Q9JJT0	Rcl1	VGIGFSNL	VGIGFSNL	2	1174.16	62.3884		b	1	6		1979.66
403.724	650.351	y6^1	Q9JJT0	Rcl1	VGIGFSNL	VGIGFSNL	2	880.26	62.3884		y	1	6		1979.66
403.724	675.346	b7^1	Q9JJT0	Rcl1	VGIGFSNL	VGIGFSNL	2	3293.22	62.3884		b	1	7		1979.66
403.724	707.372	y7^1	Q9JJT0	Rcl1	VGIGFSNL	VGIGFSNL	2	1172.25	62.3884		y	1	7		1979.66
403.73	115.05	b2^1	Q8CC35	Synpo	GGFRVASL	GGFRVASL	2	203.386	38.5303		b	1	2		1387.87
403.73	132.102	y1^1	Q8CC35	Synpo	GGFRVASL	GGFRVASL	2	2982.19	38.5303		y	1	1		1387.87
403.73	219.134	y2^1	Q8CC35	Synpo	GGFRVASL	GGFRVASL	2	3541.7	38.5303		y	1	2		1387.87
403.73	262.119	b3^1	Q8CC35	Synpo	GGFRVASL	GGFRVASL	2	49.6602	38.5303		b	1	3		1387.87
403.73	290.171	y3^1	Q8CC35	Synpo	GGFRVASL	GGFRVASL	2	190	38.5303		y	1	3		1387.87
403.73	338.182	b7^2	Q8CC35	Synpo	GGFRVASL	GGFRVASL	2	676.886	38.5303		b	2	7		1387.87
403.73	346.708	y6^2	Q8CC35	Synpo	GGFRVASL	GGFRVASL	2	132.401	38.5303		y	2	6		1387.87
403.73	418.22	b4^1	Q8CC35	Synpo	GGFRVASL	GGFRVASL	2	977.997	38.5303		b	1	4		1387.87
403.73	517.288	b5^1	Q8CC35	Synpo	GGFRVASL	GGFRVASL	2	1078.16	38.5303		b	1	5		1387.87
403.73	545.341	y5^1	Q8CC35	Synpo	GGFRVASL	GGFRVASL	2	214.891	38.5303		y	1	5		1387.87
403.73	588.325	b6^1	Q8CC35	Synpo	GGFRVASL	GGFRVASL	2	10000	38.5303		b	1	6		1387.87
403.73	675.357	b7^1	Q8CC35	Synpo	GGFRVASL	GGFRVASL	2	7811.87	38.5303		b	1	7		1387.87
403.73	692.409	y6^1	Q8CC35	Synpo	GGFRVASL	GGFRVASL	2	1170.34	38.5303		y	1	6		1387.87
403.742	132.102	y1^1	Q9ESV0	Ddx24	AVAKFTGI	AVAKFTGI	2	133.558	32.9902		y	1	1		1250.97
403.742	171.113	b2^1	Q9ESV0	Ddx24	AVAKFTGI	AVAKFTGI	2	1508.55	32.9902		b	1	2		1250.97
403.742	189.123	y2^1	Q9ESV0	Ddx24	AVAKFTGI	AVAKFTGI	2	187.447	32.9902		y	1	2		1250.97
403.742	242.15	b3^1	Q9ESV0	Ddx24	AVAKFTGI	AVAKFTGI	2	75.2624	32.9902		b	1	3		1250.97
403.742	290.171	y3^1	Q9ESV0	Ddx24	AVAKFTGI	AVAKFTGI	2	80.7826	32.9902		y	1	3		1250.97
403.742	368.224	y7^2	Q9ESV0	Ddx24	AVAKFTGI	AVAKFTGI	2	189.232	32.9902		y	2	7		1250.97
403.742	370.245	b4^1	Q9ESV0	Ddx24	AVAKFTGI	AVAKFTGI	2	54.3877	32.9902		b	1	4		1250.97
403.742	437.239	y4^1	Q9ESV0	Ddx24	AVAKFTGI	AVAKFTGI	2	211.463	32.9902		y	1	4		1250.97
403.742	517.313	b5^1	Q9ESV0	Ddx24	AVAKFTGI	AVAKFTGI	2	33.5729	32.9902		b	1	5		1250.97
403.742	565.334	y5^1	Q9ESV0	Ddx24	AVAKFTGI	AVAKFTGI	2	563.788	32.9902		y	1	5		1250.97
403.742	618.361	b6^1	Q9ESV0	Ddx24	AVAKFTGI	AVAKFTGI	2	484.985	32.9902		b	1	6		1250.97
403.742	636.372	y6^1	Q9ESV0	Ddx24	AVAKFTGI	AVAKFTGI	2	10000	32.9902		y	1	6		1250.97
403.742	675.382	b7^1	Q9ESV0	Ddx24	AVAKFTGI	AVAKFTGI	2	786.807	32.9902		b	1	7		1250.97
403.742	735.44	y7^1	Q9ESV0	Ddx24	AVAKFTGI	AVAKFTGI	2	280.212	32.9902		y	1	7		1250.97
403.863	102.053	b2^3	P84099	Rpl19	RMPEKVTWM	RM(UniMod:35)PEKVTWM(UniMod:35)	3	166.757	12.8398		b	3	2		726.678
403.863	152.576	b2^2	P84099	Rpl19	RMPEKVTWM	RM(UniMod:35)PEKVTWM(UniMod:35)	3	51.6926	12.8398		b	2	2		726.678
403.863	157.108	b1^1	P84099	Rpl19	RMPEKVTWM	RM(UniMod:35)PEKVTWM(UniMod:35)	3	133.061	12.8398		b	1	1		726.678
403.863	166.053	y1^1	P84099	Rpl19	RMPEKVTWM	RM(UniMod:35)PEKVTWM(UniMod:35)	3	9019.28	12.8398		y	1	1		726.678
403.863	201.102	b3^2	P84099	Rpl19	RMPEKVTWM	RM(UniMod:35)PEKVTWM(UniMod:35)	3	34.4457	12.8398		b	2	3		726.678
403.863	227.094	y3^2	P84099	Rpl19	RMPEKVTWM	RM(UniMod:35)PEKVTWM(UniMod:35)	3	47.7979	12.8398		y	2	3		726.678
403.863	265.623	b4^2	P84099	Rpl19	RMPEKVTWM	RM(UniMod:35)PEKVTWM(UniMod:35)	3	349.428	12.8398		b	2	4		726.678
403.863	286.822	b7^3	P84099	Rpl19	RMPEKVTWM	RM(UniMod:35)PEKVTWM(UniMod:35)	3	65.8778	12.8398		b	3	7		726.678
403.863	304.144	b2^1	P84099	Rpl19	RMPEKVTWM	RM(UniMod:35)PEKVTWM(UniMod:35)	3	3521.24	12.8398		b	1	2		726.678
403.863	329.671	b5^2	P84099	Rpl19	RMPEKVTWM	RM(UniMod:35)PEKVTWM(UniMod:35)	3	155.319	12.8398		b	2	5		726.678
403.863	348.848	b8^3	P84099	Rpl19	RMPEKVTWM	RM(UniMod:35)PEKVTWM(UniMod:35)	3	371.14	12.8398		b	3	8		726.678
403.863	352.133	y2^1	P84099	Rpl19	RMPEKVTWM	RM(UniMod:35)PEKVTWM(UniMod:35)	3	2182.02	12.8398		y	1	2		726.678
403.863	379.205	b6^2	P84099	Rpl19	RMPEKVTWM	RM(UniMod:35)PEKVTWM(UniMod:35)	3	628.859	12.8398		b	2	6		726.678
403.863	401.197	b3^1	P84099	Rpl19	RMPEKVTWM	RM(UniMod:35)PEKVTWM(UniMod:35)	3	118.407	12.8398		b	1	3		726.678
403.863	429.729	b7^2	P84099	Rpl19	RMPEKVTWM	RM(UniMod:35)PEKVTWM(UniMod:35)	3	2226.95	12.8398		b	2	7		726.678
403.863	453.18	y3^1	P84099	Rpl19	RMPEKVTWM	RM(UniMod:35)PEKVTWM(UniMod:35)	3	471.181	12.8398		y	1	3		726.678
403.863	453.723	y7^2	P84099	Rpl19	RMPEKVTWM	RM(UniMod:35)PEKVTWM(UniMod:35)	3	485.95	12.8398		y	2	7		726.678
403.863	522.768	b8^2	P84099	Rpl19	RMPEKVTWM	RM(UniMod:35)PEKVTWM(UniMod:35)	3	9901.13	12.8398		b	2	8		726.678
403.863	530.239	b4^1	P84099	Rpl19	RMPEKVTWM	RM(UniMod:35)PEKVTWM(UniMod:35)	3	2485.95	12.8398		b	1	4		726.678
403.863	552.249	y4^1	P84099	Rpl19	RMPEKVTWM	RM(UniMod:35)PEKVTWM(UniMod:35)	3	508.063	12.8398		y	1	4		726.678
403.863	658.334	b5^1	P84099	Rpl19	RMPEKVTWM	RM(UniMod:35)PEKVTWM(UniMod:35)	3	1031.47	12.8398		b	1	5		726.678
403.863	680.344	y5^1	P84099	Rpl19	RMPEKVTWM	RM(UniMod:35)PEKVTWM(UniMod:35)	3	2702.58	12.8398		y	1	5		726.678
403.863	757.403	b6^1	P84099	Rpl19	RMPEKVTWM	RM(UniMod:35)PEKVTWM(UniMod:35)	3	1482.98	12.8398		b	1	6		726.678
403.863	809.386	y6^1	P84099	Rpl19	RMPEKVTWM	RM(UniMod:35)PEKVTWM(UniMod:35)	3	216.471	12.8398		y	1	6		726.678
403.863	858.45	b7^1	P84099	Rpl19	RMPEKVTWM	RM(UniMod:35)PEKVTWM(UniMod:35)	3	556.338	12.8398		b	1	7		726.678
403.863	906.439	y7^1	P84099	Rpl19	RMPEKVTWM	RM(UniMod:35)PEKVTWM(UniMod:35)	3	321.598	12.8398		y	1	7		726.678
403.885	132.102	y1^1	Q68FD5	Cltc	RVMEYINRL	RVM(UniMod:35)EYINRL	3	45.6702	25.5496		y	1	1		1030.34
403.885	135.076	b3^3	Q68FD5	Cltc	RVMEYINRL	RVM(UniMod:35)EYINRL	3	1.57162	25.5496		b	3	3		1030.34
403.885	157.108	b1^1	Q68FD5	Cltc	RVMEYINRL	RVM(UniMod:35)EYINRL	3	36.3533	25.5496		b	1	1		1030.34
403.885	201.627	y3^2	Q68FD5	Cltc	RVMEYINRL	RVM(UniMod:35)EYINRL	3	47.6093	25.5496		y	2	3		1030.34
403.885	202.11	b3^2	Q68FD5	Cltc	RVMEYINRL	RVM(UniMod:35)EYINRL	3	423.217	25.5496		b	2	3		1030.34
403.885	256.177	b2^1	Q68FD5	Cltc	RVMEYINRL	RVM(UniMod:35)EYINRL	3	746.219	25.5496		b	1	2		1030.34
403.885	258.169	y4^2	Q68FD5	Cltc	RVMEYINRL	RVM(UniMod:35)EYINRL	3	327.688	25.5496		y	2	4		1030.34
403.885	266.631	b4^2	Q68FD5	Cltc	RVMEYINRL	RVM(UniMod:35)EYINRL	3	474.748	25.5496		b	2	4		1030.34
403.885	269.817	y6^3	Q68FD5	Cltc	RVMEYINRL	RVM(UniMod:35)EYINRL	3	57.0802	25.5496		y	3	6		1030.34
403.885	288.203	y2^1	Q68FD5	Cltc	RVMEYINRL	RVM(UniMod:35)EYINRL	3	159.931	25.5496		y	1	2		1030.34
403.885	308.153	b7^3	Q68FD5	Cltc	RVMEYINRL	RVM(UniMod:35)EYINRL	3	6.87389	25.5496		b	3	7		1030.34
403.885	318.829	y7^3	Q68FD5	Cltc	RVMEYINRL	RVM(UniMod:35)EYINRL	3	70.322	25.5496		y	3	7		1030.34
403.885	339.7	y5^2	Q68FD5	Cltc	RVMEYINRL	RVM(UniMod:35)EYINRL	3	211.946	25.5496		y	2	5		1030.34
403.885	348.163	b5^2	Q68FD5	Cltc	RVMEYINRL	RVM(UniMod:35)EYINRL	3	695.952	25.5496		b	2	5		1030.34
403.885	360.187	b8^3	Q68FD5	Cltc	RVMEYINRL	RVM(UniMod:35)EYINRL	3	66.2988	25.5496		b	3	8		1030.34
403.885	402.246	y3^1	Q68FD5	Cltc	RVMEYINRL	RVM(UniMod:35)EYINRL	3	7494.86	25.5496		y	1	3		1030.34
403.885	403.212	b3^1	Q68FD5	Cltc	RVMEYINRL	RVM(UniMod:35)EYINRL	3	2339.89	25.5496		b	1	3		1030.34
403.885	404.222	y6^2	Q68FD5	Cltc	RVMEYINRL	RVM(UniMod:35)EYINRL	3	2085.8	25.5496		y	2	6		1030.34
403.885	404.705	b6^2	Q68FD5	Cltc	RVMEYINRL	RVM(UniMod:35)EYINRL	3	495.409	25.5496		b	2	6		1030.34
403.885	461.726	b7^2	Q68FD5	Cltc	RVMEYINRL	RVM(UniMod:35)EYINRL	3	14.0301	25.5496		b	2	7		1030.34
403.885	477.739	y7^2	Q68FD5	Cltc	RVMEYINRL	RVM(UniMod:35)EYINRL	3	41.964	25.5496		y	2	7		1030.34
403.885	515.33	y4^1	Q68FD5	Cltc	RVMEYINRL	RVM(UniMod:35)EYINRL	3	10000	25.5496		y	1	4		1030.34
403.885	532.255	b4^1	Q68FD5	Cltc	RVMEYINRL	RVM(UniMod:35)EYINRL	3	7962.19	25.5496		b	1	4		1030.34
403.885	539.777	b8^2	Q68FD5	Cltc	RVMEYINRL	RVM(UniMod:35)EYINRL	3	137.378	25.5496		b	2	8		1030.34
403.885	678.393	y5^1	Q68FD5	Cltc	RVMEYINRL	RVM(UniMod:35)EYINRL	3	1441	25.5496		y	1	5		1030.34
403.885	695.318	b5^1	Q68FD5	Cltc	RVMEYINRL	RVM(UniMod:35)EYINRL	3	4353.76	25.5496		b	1	5		1030.34
403.885	807.436	y6^1	Q68FD5	Cltc	RVMEYINRL	RVM(UniMod:35)EYINRL	3	780.069	25.5496		y	1	6		1030.34
403.885	808.402	b6^1	Q68FD5	Cltc	RVMEYINRL	RVM(UniMod:35)EYINRL	3	161.378	25.5496		b	1	6		1030.34
404.189	130.05	b1^1	P62192	Psmc1	EFIRNQEQM	EFIRNQEQM(UniMod:35)	3	300.438	10.0166		b	1	1		670.242
404.189	166.053	y1^1	P62192	Psmc1	EFIRNQEQM	EFIRNQEQM(UniMod:35)	3	10000	10.0166		y	1	1		670.242
404.189	277.118	b2^1	P62192	Psmc1	EFIRNQEQM	EFIRNQEQM(UniMod:35)	3	819.919	10.0166		b	1	2		670.242
404.189	294.112	y2^1	P62192	Psmc1	EFIRNQEQM	EFIRNQEQM(UniMod:35)	3	2396.55	10.0166		y	1	2		670.242
404.189	361.175	y8^3	P62192	Psmc1	EFIRNQEQM	EFIRNQEQM(UniMod:35)	3	87.0743	10.0166		y	3	8		670.242
404.189	411.182	y6^2	P62192	Psmc1	EFIRNQEQM	EFIRNQEQM(UniMod:35)	3	1974.25	10.0166		y	2	6		670.242
404.189	423.154	y3^1	P62192	Psmc1	EFIRNQEQM	EFIRNQEQM(UniMod:35)	3	1731.81	10.0166		y	1	3		670.242
404.189	467.724	y7^2	P62192	Psmc1	EFIRNQEQM	EFIRNQEQM(UniMod:35)	3	656.461	10.0166		y	2	7		670.242
404.189	523.257	b8^2	P62192	Psmc1	EFIRNQEQM	EFIRNQEQM(UniMod:35)	3	1310.07	10.0166		b	2	8		670.242
404.189	551.213	y4^1	P62192	Psmc1	EFIRNQEQM	EFIRNQEQM(UniMod:35)	3	443.723	10.0166		y	1	4		670.242
404.189	660.346	b5^1	P62192	Psmc1	EFIRNQEQM	EFIRNQEQM(UniMod:35)	3	927.182	10.0166		b	1	5		670.242
404.189	665.256	y5^1	P62192	Psmc1	EFIRNQEQM	EFIRNQEQM(UniMod:35)	3	649.953	10.0166		y	1	5		670.242
404.189	788.405	b6^1	P62192	Psmc1	EFIRNQEQM	EFIRNQEQM(UniMod:35)	3	128.649	10.0166		b	1	6		670.242
404.189	917.448	b7^1	P62192	Psmc1	EFIRNQEQM	EFIRNQEQM(UniMod:35)	3	2376.57	10.0166		b	1	7		670.242
404.191	166.053	y1^1	Q80SU7	Gvin1	IMYDKHIQM	IM(UniMod:35)YDKHIQM(UniMod:35)	3	2668.05	8.99223		y	1	1		652.294
404.191	261.127	b2^1	Q80SU7	Gvin1	IMYDKHIQM	IM(UniMod:35)YDKHIQM(UniMod:35)	3	1161.11	8.99223		b	1	2		652.294
404.191	294.112	y2^1	Q80SU7	Gvin1	IMYDKHIQM	IM(UniMod:35)YDKHIQM(UniMod:35)	3	881.86	8.99223		y	1	2		652.294
404.191	336.679	y5^2	Q80SU7	Gvin1	IMYDKHIQM	IM(UniMod:35)YDKHIQM(UniMod:35)	3	612.353	8.99223		y	2	5		652.294
404.191	394.192	y6^2	Q80SU7	Gvin1	IMYDKHIQM	IM(UniMod:35)YDKHIQM(UniMod:35)	3	202.833	8.99223		y	2	6		652.294
404.191	402.689	b6^2	Q80SU7	Gvin1	IMYDKHIQM	IM(UniMod:35)YDKHIQM(UniMod:35)	3	874.707	8.99223		b	2	6		652.294
404.191	407.196	y3^1	Q80SU7	Gvin1	IMYDKHIQM	IM(UniMod:35)YDKHIQM(UniMod:35)	3	542.872	8.99223		y	1	3		652.294
404.191	424.19	b3^1	Q80SU7	Gvin1	IMYDKHIQM	IM(UniMod:35)YDKHIQM(UniMod:35)	3	238.468	8.99223		b	1	3		652.294
404.191	459.231	b7^2	Q80SU7	Gvin1	IMYDKHIQM	IM(UniMod:35)YDKHIQM(UniMod:35)	3	291.908	8.99223		b	2	7		652.294
404.191	475.724	y7^2	Q80SU7	Gvin1	IMYDKHIQM	IM(UniMod:35)YDKHIQM(UniMod:35)	3	5689.47	8.99223		y	2	7		652.294
404.191	523.26	b8^2	Q80SU7	Gvin1	IMYDKHIQM	IM(UniMod:35)YDKHIQM(UniMod:35)	3	2165.56	8.99223		b	2	8		652.294
404.191	539.217	b4^1	Q80SU7	Gvin1	IMYDKHIQM	IM(UniMod:35)YDKHIQM(UniMod:35)	3	743.326	8.99223		b	1	4		652.294
404.191	544.255	y4^1	Q80SU7	Gvin1	IMYDKHIQM	IM(UniMod:35)YDKHIQM(UniMod:35)	3	365.448	8.99223		y	1	4		652.294
404.191	549.241	y8^2	Q80SU7	Gvin1	IMYDKHIQM	IM(UniMod:35)YDKHIQM(UniMod:35)	3	10000	8.99223		y	2	8		652.294
404.191	667.312	b5^1	Q80SU7	Gvin1	IMYDKHIQM	IM(UniMod:35)YDKHIQM(UniMod:35)	3	202.331	8.99223		b	1	5		652.294
404.191	672.35	y5^1	Q80SU7	Gvin1	IMYDKHIQM	IM(UniMod:35)YDKHIQM(UniMod:35)	3	406.186	8.99223		y	1	5		652.294
404.191	787.377	y6^1	Q80SU7	Gvin1	IMYDKHIQM	IM(UniMod:35)YDKHIQM(UniMod:35)	3	1662.67	8.99223		y	1	6		652.294
404.191	804.371	b6^1	Q80SU7	Gvin1	IMYDKHIQM	IM(UniMod:35)YDKHIQM(UniMod:35)	3	1873.7	8.99223		b	1	6		652.294
404.191	917.455	b7^1	Q80SU7	Gvin1	IMYDKHIQM	IM(UniMod:35)YDKHIQM(UniMod:35)	3	299.128	8.99223		b	1	7		652.294
404.191	950.44	y7^1	Q80SU7	Gvin1	IMYDKHIQM	IM(UniMod:35)YDKHIQM(UniMod:35)	3	220.47	8.99223		y	1	7		652.294
404.203	145.061	b2^1	Q8VH51	Rbm39	SGPKFNSA	SGPKFNSA	2	2696.04	3.89025		b	1	2		526.636
404.203	177.087	y2^1	Q8VH51	Rbm39	SGPKFNSA	SGPKFNSA	2	2311.94	3.89025		y	1	2		526.636
404.203	242.114	b3^1	Q8VH51	Rbm39	SGPKFNSA	SGPKFNSA	2	274.365	3.89025		b	1	3		526.636
404.203	291.13	y3^1	Q8VH51	Rbm39	SGPKFNSA	SGPKFNSA	2	639.13	3.89025		y	1	3		526.636
404.203	316.164	b6^2	Q8VH51	Rbm39	SGPKFNSA	SGPKFNSA	2	156.762	3.89025		b	2	6		526.636
404.203	332.177	y6^2	Q8VH51	Rbm39	SGPKFNSA	SGPKFNSA	2	3479.8	3.89025		y	2	6		526.636
404.203	359.68	b7^2	Q8VH51	Rbm39	SGPKFNSA	SGPKFNSA	2	1378.44	3.89025		b	2	7		526.636
404.203	370.208	b4^1	Q8VH51	Rbm39	SGPKFNSA	SGPKFNSA	2	545.157	3.89025		b	1	4		526.636
404.203	517.277	b5^1	Q8VH51	Rbm39	SGPKFNSA	SGPKFNSA	2	1637.82	3.89025		b	1	5		526.636
404.203	631.32	b6^1	Q8VH51	Rbm39	SGPKFNSA	SGPKFNSA	2	10000	3.89025		b	1	6		526.636
404.203	663.346	y6^1	Q8VH51	Rbm39	SGPKFNSA	SGPKFNSA	2	2806.9	3.89025		y	1	6		526.636
404.203	718.352	b7^1	Q8VH51	Rbm39	SGPKFNSA	SGPKFNSA	2	5341.3	3.89025		b	1	7		526.636
404.216	132.102	y1^1	A2AGT5	Ckap5	SPKFSEL	SPKFSEL	2	2673.26	29.5514		y	1	1		1156.35
404.216	157.097	b3^2	A2AGT5	Ckap5	SPKFSEL	SPKFSEL	2	467.198	29.5514		b	2	3		1156.35
404.216	185.092	b2^1	A2AGT5	Ckap5	SPKFSEL	SPKFSEL	2	435.945	29.5514		b	1	2		1156.35
404.216	261.144	y2^1	A2AGT5	Ckap5	SPKFSEL	SPKFSEL	2	49.3164	29.5514		y	1	2		1156.35
404.216	313.187	b3^1	A2AGT5	Ckap5	SPKFSEL	SPKFSEL	2	524.643	29.5514		b	1	3		1156.35
404.216	338.669	b6^2	A2AGT5	Ckap5	SPKFSEL	SPKFSEL	2	421.212	29.5514		b	2	6		1156.35
404.216	348.177	y3^1	A2AGT5	Ckap5	SPKFSEL	SPKFSEL	2	16.2698	29.5514		y	1	3		1156.35
404.216	360.7	y6^2	A2AGT5	Ckap5	SPKFSEL	SPKFSEL	2	695.511	29.5514		y	2	6		1156.35
404.216	460.255	b4^1	A2AGT5	Ckap5	SPKFSEL	SPKFSEL	2	378.797	29.5514		b	1	4		1156.35
404.216	495.245	y4^1	A2AGT5	Ckap5	SPKFSEL	SPKFSEL	2	145.53	29.5514		y	1	4		1156.35
404.216	547.287	b5^1	A2AGT5	Ckap5	SPKFSEL	SPKFSEL	2	1228.98	29.5514		b	1	5		1156.35
404.216	623.34	y5^1	A2AGT5	Ckap5	SPKFSEL	SPKFSEL	2	1023.15	29.5514		y	1	5		1156.35
404.216	676.33	b6^1	A2AGT5	Ckap5	SPKFSEL	SPKFSEL	2	10000	29.5514		b	1	6		1156.35
404.216	720.393	y6^1	A2AGT5	Ckap5	SPKFSEL	SPKFSEL	2	532.414	29.5514		y	1	6		1156.35
404.222	130.05	b1^1	P31254	Uba1y	EYIRGGI	EYIRGGI	2	223.862	24.0394		b	1	1		996.18
404.222	132.102	y1^1	P31254	Uba1y	EYIRGGI	EYIRGGI	2	444.94	24.0394		y	1	1		996.18
404.222	189.123	y2^1	P31254	Uba1y	EYIRGGI	EYIRGGI	2	67.4896	24.0394		y	1	2		996.18
404.222	258.169	y5^2	P31254	Uba1y	EYIRGGI	EYIRGGI	2	513.567	24.0394		y	2	5		996.18
404.222	293.113	b2^1	P31254	Uba1y	EYIRGGI	EYIRGGI	2	615.328	24.0394		b	1	2		996.18
404.222	339.7	y6^2	P31254	Uba1y	EYIRGGI	EYIRGGI	2	198.013	24.0394		y	2	6		996.18
404.222	402.246	y4^1	P31254	Uba1y	EYIRGGI	EYIRGGI	2	10000	24.0394		y	1	4		996.18
404.222	406.197	b3^1	P31254	Uba1y	EYIRGGI	EYIRGGI	2	87.8289	24.0394		b	1	3		996.18
404.222	515.33	y5^1	P31254	Uba1y	EYIRGGI	EYIRGGI	2	6704.46	24.0394		y	1	5		996.18
404.222	676.341	b6^1	P31254	Uba1y	EYIRGGI	EYIRGGI	2	256.958	24.0394		b	1	6		996.18
404.222	678.393	y6^1	P31254	Uba1y	EYIRGGI	EYIRGGI	2	363.376	24.0394		y	1	6		996.18
404.234	132.102	y1^1	Q5NCQ5	Dph1	IQFVSTL	IQFVSTL	2	8043.88	67.9779		y	1	1		2119.19
404.234	233.15	y2^1	Q5NCQ5	Dph1	IQFVSTL	IQFVSTL	2	658.819	67.9779		y	1	2		2119.19
404.234	242.15	b2^1	Q5NCQ5	Dph1	IQFVSTL	IQFVSTL	2	335.705	67.9779		b	1	2		2119.19
404.234	320.182	y3^1	Q5NCQ5	Dph1	IQFVSTL	IQFVSTL	2	4127.04	67.9779		y	1	3		2119.19
404.234	389.218	b3^1	Q5NCQ5	Dph1	IQFVSTL	IQFVSTL	2	607.117	67.9779		b	1	3		2119.19
404.234	488.287	b4^1	Q5NCQ5	Dph1	IQFVSTL	IQFVSTL	2	6330.39	67.9779		b	1	4		2119.19
404.234	575.319	b5^1	Q5NCQ5	Dph1	IQFVSTL	IQFVSTL	2	1978.49	67.9779		b	1	5		2119.19
404.234	676.366	b6^1	Q5NCQ5	Dph1	IQFVSTL	IQFVSTL	2	10000	67.9779		b	1	6		2119.19
404.234	132.102	y1^1	Q8CFE6	Slc38a2	ILSFTNL	ILSFTNL	2	5635.01	69.905		y	1	1		2163.48
404.234	227.175	b2^1	Q8CFE6	Slc38a2	ILSFTNL	ILSFTNL	2	7592.22	69.905		b	1	2		2163.48
404.234	246.145	y2^1	Q8CFE6	Slc38a2	ILSFTNL	ILSFTNL	2	3135.82	69.905		y	1	2		2163.48
404.234	281.665	b5^2	Q8CFE6	Slc38a2	ILSFTNL	ILSFTNL	2	2181.15	69.905		b	2	5		2163.48
404.234	314.207	b3^1	Q8CFE6	Slc38a2	ILSFTNL	ILSFTNL	2	3336.37	69.905		b	1	3		2163.48
404.234	347.193	y3^1	Q8CFE6	Slc38a2	ILSFTNL	ILSFTNL	2	2655.41	69.905		y	1	3		2163.48
404.234	461.276	b4^1	Q8CFE6	Slc38a2	ILSFTNL	ILSFTNL	2	2098.26	69.905		b	1	4		2163.48
404.234	494.261	y4^1	Q8CFE6	Slc38a2	ILSFTNL	ILSFTNL	2	1036.17	69.905		y	1	4		2163.48
404.234	562.324	b5^1	Q8CFE6	Slc38a2	ILSFTNL	ILSFTNL	2	7353.98	69.905		b	1	5		2163.48
404.234	581.293	y5^1	Q8CFE6	Slc38a2	ILSFTNL	ILSFTNL	2	7865.93	69.905		y	1	5		2163.48
404.234	676.366	b6^1	Q8CFE6	Slc38a2	ILSFTNL	ILSFTNL	2	10000	69.905		b	1	6		2163.48
404.234	694.377	y6^1	Q8CFE6	Slc38a2	ILSFTNL	ILSFTNL	2	1724.13	69.905		y	1	6		2163.48
404.239	106.05	y1^1	O09043	Napsa	VGPRVGLARAQS	VGPRVGLARAQS	3	365.398	13.8514		y	1	1		771.635
404.239	157.097	b2^1	O09043	Napsa	VGPRVGLARAQS	VGPRVGLARAQS	3	1261.31	13.8514		b	1	2		771.635
404.239	255.163	b5^2	O09043	Napsa	VGPRVGLARAQS	VGPRVGLARAQS	3	22.5427	13.8514		b	2	5		771.635
404.239	283.674	b6^2	O09043	Napsa	VGPRVGLARAQS	VGPRVGLARAQS	3	71.8753	13.8514		b	2	6		771.635
404.239	323.188	y6^2	O09043	Napsa	VGPRVGLARAQS	VGPRVGLARAQS	3	65.2377	13.8514		y	2	6		771.635
404.239	340.216	b7^2	O09043	Napsa	VGPRVGLARAQS	VGPRVGLARAQS	3	86.1504	13.8514		b	2	7		771.635
404.239	352.209	y10^3	O09043	Napsa	VGPRVGLARAQS	VGPRVGLARAQS	3	675.383	13.8514		y	3	10		771.635
404.239	369.224	b11^3	O09043	Napsa	VGPRVGLARAQS	VGPRVGLARAQS	3	379.037	13.8514		b	3	11		771.635
404.239	410.251	b4^1	O09043	Napsa	VGPRVGLARAQS	VGPRVGLARAQS	3	98.0022	13.8514		b	1	4		771.635
404.239	453.785	b9^2	O09043	Napsa	VGPRVGLARAQS	VGPRVGLARAQS	3	143.306	13.8514		b	2	9		771.635
404.239	461.247	y4^1	O09043	Napsa	VGPRVGLARAQS	VGPRVGLARAQS	3	501.99	13.8514		y	1	4		771.635
404.239	489.304	b10^2	O09043	Napsa	VGPRVGLARAQS	VGPRVGLARAQS	3	35.6762	13.8514		b	2	10		771.635
404.239	527.809	y10^2	O09043	Napsa	VGPRVGLARAQS	VGPRVGLARAQS	3	6955.02	13.8514		y	2	10		771.635
404.239	532.284	y5^1	O09043	Napsa	VGPRVGLARAQS	VGPRVGLARAQS	3	1049.89	13.8514		y	1	5		771.635
404.239	553.333	b11^2	O09043	Napsa	VGPRVGLARAQS	VGPRVGLARAQS	3	1320.74	13.8514		b	2	11		771.635
404.239	556.32	y11^2	O09043	Napsa	VGPRVGLARAQS	VGPRVGLARAQS	3	10000	13.8514		y	2	11		771.635
404.239	566.341	b6^1	O09043	Napsa	VGPRVGLARAQS	VGPRVGLARAQS	3	789.986	13.8514		b	1	6		771.635
404.239	645.368	y6^1	O09043	Napsa	VGPRVGLARAQS	VGPRVGLARAQS	3	256.078	13.8514		y	1	6		771.635
404.239	679.425	b7^1	O09043	Napsa	VGPRVGLARAQS	VGPRVGLARAQS	3	337.339	13.8514		b	1	7		771.635
404.239	702.389	y7^1	O09043	Napsa	VGPRVGLARAQS	VGPRVGLARAQS	3	202.819	13.8514		y	1	7		771.635
404.239	801.458	y8^1	O09043	Napsa	VGPRVGLARAQS	VGPRVGLARAQS	3	163.713	13.8514		y	1	8		771.635
404.24	132.102	y1^1	Q6WKZ8	Ubr2	PTNLIHL	PTNLIHL	2	3881.41	63.2037		y	1	1		2000.44
404.24	269.161	y2^1	Q6WKZ8	Ubr2	PTNLIHL	PTNLIHL	2	10000	63.2037		y	1	2		2000.44
404.24	313.151	b3^1	Q6WKZ8	Ubr2	PTNLIHL	PTNLIHL	2	3498.27	63.2037		b	1	3		2000.44
404.24	338.692	b6^2	Q6WKZ8	Ubr2	PTNLIHL	PTNLIHL	2	2880.16	63.2037		b	2	6		2000.44
404.24	382.245	y3^1	Q6WKZ8	Ubr2	PTNLIHL	PTNLIHL	2	322.077	63.2037		y	1	3		2000.44
404.24	426.235	b4^1	Q6WKZ8	Ubr2	PTNLIHL	PTNLIHL	2	7992.53	63.2037		b	1	4		2000.44
404.24	539.319	b5^1	Q6WKZ8	Ubr2	PTNLIHL	PTNLIHL	2	3634.45	63.2037		b	1	5		2000.44
404.24	609.372	y5^1	Q6WKZ8	Ubr2	PTNLIHL	PTNLIHL	2	8336.54	63.2037		y	1	5		2000.44
404.24	676.378	b6^1	Q6WKZ8	Ubr2	PTNLIHL	PTNLIHL	2	2142.18	63.2037		b	1	6		2000.44
404.24	710.42	y6^1	Q6WKZ8	Ubr2	PTNLIHL	PTNLIHL	2	8123.09	63.2037		y	1	6		2000.44
404.708	132.102	y1^1	P55096	Abcd3	SLVNNFL	SLVN(UniMod:7)N(UniMod:7)FL	2	8251.67	70.6128		y	1	1		2183.77
404.708	201.123	b2^1	P55096	Abcd3	SLVNNFL	SLVN(UniMod:7)N(UniMod:7)FL	2	2959.87	70.6128		b	1	2		2183.77
404.708	279.17	y2^1	P55096	Abcd3	SLVNNFL	SLVN(UniMod:7)N(UniMod:7)FL	2	706.864	70.6128		y	1	2		2183.77
404.708	300.192	b3^1	P55096	Abcd3	SLVNNFL	SLVN(UniMod:7)N(UniMod:7)FL	2	1123.92	70.6128		b	1	3		2183.77
404.708	339.161	b6^2	P55096	Abcd3	SLVNNFL	SLVN(UniMod:7)N(UniMod:7)FL	2	144.89	70.6128		b	2	6		2183.77
404.708	394.197	y3^1	P55096	Abcd3	SLVNNFL	SLVN(UniMod:7)N(UniMod:7)FL	2	287.354	70.6128		y	1	3		2183.77
404.708	415.219	b4^1	P55096	Abcd3	SLVNNFL	SLVN(UniMod:7)N(UniMod:7)FL	2	465.818	70.6128		b	1	4		2183.77
404.708	509.224	y4^1	P55096	Abcd3	SLVNNFL	SLVN(UniMod:7)N(UniMod:7)FL	2	142.364	70.6128		y	1	4		2183.77
404.708	530.246	b5^1	P55096	Abcd3	SLVNNFL	SLVN(UniMod:7)N(UniMod:7)FL	2	5588.72	70.6128		b	1	5		2183.77
404.708	608.293	y5^1	P55096	Abcd3	SLVNNFL	SLVN(UniMod:7)N(UniMod:7)FL	2	3300.49	70.6128		y	1	5		2183.77
404.708	677.314	b6^1	P55096	Abcd3	SLVNNFL	SLVN(UniMod:7)N(UniMod:7)FL	2	10000	70.6128		b	1	6		2183.77
404.714	118.086	y1^1	Q3TDQ1	Stt3b	SAIAFSNV	SAIAFSNV	2	2974.41	45.5821		y	1	1		1564.43
404.714	159.076	b2^1	Q3TDQ1	Stt3b	SAIAFSNV	SAIAFSNV	2	6778.41	45.5821		b	1	2		1564.43
404.714	232.129	y2^1	Q3TDQ1	Stt3b	SAIAFSNV	SAIAFSNV	2	970.391	45.5821		y	1	2		1564.43
404.714	272.16	b3^1	Q3TDQ1	Stt3b	SAIAFSNV	SAIAFSNV	2	8414.62	45.5821		b	1	3		1564.43
404.714	289.153	b6^2	Q3TDQ1	Stt3b	SAIAFSNV	SAIAFSNV	2	375.932	45.5821		b	2	6		1564.43
404.714	319.161	y3^1	Q3TDQ1	Stt3b	SAIAFSNV	SAIAFSNV	2	6930.59	45.5821		y	1	3		1564.43
404.714	343.198	b4^1	Q3TDQ1	Stt3b	SAIAFSNV	SAIAFSNV	2	6650.47	45.5821		b	1	4		1564.43
404.714	466.23	y4^1	Q3TDQ1	Stt3b	SAIAFSNV	SAIAFSNV	2	2693.69	45.5821		y	1	4		1564.43
404.714	490.266	b5^1	Q3TDQ1	Stt3b	SAIAFSNV	SAIAFSNV	2	10000	45.5821		b	1	5		1564.43
404.714	537.267	y5^1	Q3TDQ1	Stt3b	SAIAFSNV	SAIAFSNV	2	2367	45.5821		y	1	5		1564.43
404.714	577.298	b6^1	Q3TDQ1	Stt3b	SAIAFSNV	SAIAFSNV	2	3756.25	45.5821		b	1	6		1564.43
404.714	650.351	y6^1	Q3TDQ1	Stt3b	SAIAFSNV	SAIAFSNV	2	9745.61	45.5821		y	1	6		1564.43
404.714	691.341	b7^1	Q3TDQ1	Stt3b	SAIAFSNV	SAIAFSNV	2	6906.34	45.5821		b	1	7		1564.43
404.732	120.066	y1^1	Q9EQ32	Pik3ap1	YGLKNLT	YGLKNLT	2	3365.07	27.9671		y	1	1		1097.46
404.732	221.092	b2^1	Q9EQ32	Pik3ap1	YGLKNLT	YGLKNLT	2	2155.55	27.9671		b	1	2		1097.46
404.732	233.15	y2^1	Q9EQ32	Pik3ap1	YGLKNLT	YGLKNLT	2	291.257	27.9671		y	1	2		1097.46
404.732	345.203	b6^2	Q9EQ32	Pik3ap1	YGLKNLT	YGLKNLT	2	685.179	27.9671		b	2	6		1097.46
404.732	475.287	y4^1	Q9EQ32	Pik3ap1	YGLKNLT	YGLKNLT	2	2231.72	27.9671		y	1	4		1097.46
404.732	576.314	b5^1	Q9EQ32	Pik3ap1	YGLKNLT	YGLKNLT	2	3449.67	27.9671		b	1	5		1097.46
404.732	588.372	y5^1	Q9EQ32	Pik3ap1	YGLKNLT	YGLKNLT	2	1372.64	27.9671		y	1	5		1097.46
404.732	645.393	y6^1	Q9EQ32	Pik3ap1	YGLKNLT	YGLKNLT	2	4716.65	27.9671		y	1	6		1097.46
404.732	689.398	b6^1	Q9EQ32	Pik3ap1	YGLKNLT	YGLKNLT	2	10000	27.9671		b	1	6		1097.46
405.187	132.102	y1^1	Q9WVK4	Ehd1	SSGDFPSL	SSGDFPSL	2	5938.29	48.9235		y	1	1		1647.77
405.187	175.071	b2^1	Q9WVK4	Ehd1	SSGDFPSL	SSGDFPSL	2	3008.82	48.9235		b	1	2		1647.77
405.187	219.134	y2^1	Q9WVK4	Ehd1	SSGDFPSL	SSGDFPSL	2	4007.36	48.9235		y	1	2		1647.77
405.187	232.093	b3^1	Q9WVK4	Ehd1	SSGDFPSL	SSGDFPSL	2	78.7829	48.9235		b	1	3		1647.77
405.187	296.124	b6^2	Q9WVK4	Ehd1	SSGDFPSL	SSGDFPSL	2	150.253	48.9235		b	2	6		1647.77
405.187	316.187	y3^1	Q9WVK4	Ehd1	SSGDFPSL	SSGDFPSL	2	8590.22	48.9235		y	1	3		1647.77
405.187	339.64	b7^2	Q9WVK4	Ehd1	SSGDFPSL	SSGDFPSL	2	349.752	48.9235		b	2	7		1647.77
405.187	347.12	b4^1	Q9WVK4	Ehd1	SSGDFPSL	SSGDFPSL	2	2220.87	48.9235		b	1	4		1647.77
405.187	361.671	y7^2	Q9WVK4	Ehd1	SSGDFPSL	SSGDFPSL	2	130.439	48.9235		y	2	7		1647.77
405.187	463.255	y4^1	Q9WVK4	Ehd1	SSGDFPSL	SSGDFPSL	2	1515.06	48.9235		y	1	4		1647.77
405.187	494.188	b5^1	Q9WVK4	Ehd1	SSGDFPSL	SSGDFPSL	2	10000	48.9235		b	1	5		1647.77
405.187	578.282	y5^1	Q9WVK4	Ehd1	SSGDFPSL	SSGDFPSL	2	124.1	48.9235		y	1	5		1647.77
405.187	591.241	b6^1	Q9WVK4	Ehd1	SSGDFPSL	SSGDFPSL	2	3381.85	48.9235		b	1	6		1647.77
405.187	635.304	y6^1	Q9WVK4	Ehd1	SSGDFPSL	SSGDFPSL	2	1249.05	48.9235		y	1	6		1647.77
405.187	678.273	b7^1	Q9WVK4	Ehd1	SSGDFPSL	SSGDFPSL	2	7304.88	48.9235		b	1	7		1647.77
405.187	722.336	y7^1	Q9WVK4	Ehd1	SSGDFPSL	SSGDFPSL	2	196.874	48.9235		y	1	7		1647.77
405.189	106.05	y1^1	Q8VI51	Sorcs3	AMENIKS	AM(UniMod:35)EN(UniMod:7)IKS	2	1136.88	-5.49759		y	1	1		331.485
405.189	219.08	b2^1	Q8VI51	Sorcs3	AMENIKS	AM(UniMod:35)EN(UniMod:7)IKS	2	2741.13	-5.49759		b	1	2		331.485
405.189	234.145	y2^1	Q8VI51	Sorcs3	AMENIKS	AM(UniMod:35)EN(UniMod:7)IKS	2	1833.62	-5.49759		y	1	2		331.485
405.189	347.229	y3^1	Q8VI51	Sorcs3	AMENIKS	AM(UniMod:35)EN(UniMod:7)IKS	2	3180.27	-5.49759		y	1	3		331.485
405.189	348.122	b3^1	Q8VI51	Sorcs3	AMENIKS	AM(UniMod:35)EN(UniMod:7)IKS	2	626.707	-5.49759		b	1	3		331.485
405.189	352.668	b6^2	Q8VI51	Sorcs3	AMENIKS	AM(UniMod:35)EN(UniMod:7)IKS	2	445.179	-5.49759		b	2	6		331.485
405.189	369.671	y6^2	Q8VI51	Sorcs3	AMENIKS	AM(UniMod:35)EN(UniMod:7)IKS	2	1922.21	-5.49759		y	2	6		331.485
405.189	462.256	y4^1	Q8VI51	Sorcs3	AMENIKS	AM(UniMod:35)EN(UniMod:7)IKS	2	974.288	-5.49759		y	1	4		331.485
405.189	463.149	b4^1	Q8VI51	Sorcs3	AMENIKS	AM(UniMod:35)EN(UniMod:7)IKS	2	4702.4	-5.49759		b	1	4		331.485
405.189	576.233	b5^1	Q8VI51	Sorcs3	AMENIKS	AM(UniMod:35)EN(UniMod:7)IKS	2	2719.5	-5.49759		b	1	5		331.485
405.189	591.298	y5^1	Q8VI51	Sorcs3	AMENIKS	AM(UniMod:35)EN(UniMod:7)IKS	2	10000	-5.49759		y	1	5		331.485
405.189	704.328	b6^1	Q8VI51	Sorcs3	AMENIKS	AM(UniMod:35)EN(UniMod:7)IKS	2	1132.36	-5.49759		b	1	6		331.485
405.189	738.334	y6^1	Q8VI51	Sorcs3	AMENIKS	AM(UniMod:35)EN(UniMod:7)IKS	2	1726.71	-5.49759		y	1	6		331.485
405.206	132.102	y1^1	Q9JKF1	Iqgap1	AADTFTAL	AADTFTAL	2	8705.07	46.7461		y	1	1		1594.8
405.206	143.082	b2^1	Q9JKF1	Iqgap1	AADTFTAL	AADTFTAL	2	4524.91	46.7461		b	1	2		1594.8
405.206	203.139	y2^1	Q9JKF1	Iqgap1	AADTFTAL	AADTFTAL	2	4340.99	46.7461		y	1	2		1594.8
405.206	304.187	y3^1	Q9JKF1	Iqgap1	AADTFTAL	AADTFTAL	2	678.136	46.7461		y	1	3		1594.8
405.206	359.156	b4^1	Q9JKF1	Iqgap1	AADTFTAL	AADTFTAL	2	2824.66	46.7461		b	1	4		1594.8
405.206	451.255	y4^1	Q9JKF1	Iqgap1	AADTFTAL	AADTFTAL	2	1531.47	46.7461		y	1	4		1594.8
405.206	506.225	b5^1	Q9JKF1	Iqgap1	AADTFTAL	AADTFTAL	2	1567.39	46.7461		b	1	5		1594.8
405.206	552.303	y5^1	Q9JKF1	Iqgap1	AADTFTAL	AADTFTAL	2	837.629	46.7461		y	1	5		1594.8
405.206	607.272	b6^1	Q9JKF1	Iqgap1	AADTFTAL	AADTFTAL	2	9661.46	46.7461		b	1	6		1594.8
405.206	678.309	b7^1	Q9JKF1	Iqgap1	AADTFTAL	AADTFTAL	2	10000	46.7461		b	1	7		1594.8
405.242	132.102	y1^1	Q9DBB1	Dusp6	SSPPLPVL	SSPPLPVL	2	6087	61.2951		y	1	1		1953.79
405.242	175.071	b2^1	Q9DBB1	Dusp6	SSPPLPVL	SSPPLPVL	2	2019.14	61.2951		b	1	2		1953.79
405.242	185.092	b4^2	Q9DBB1	Dusp6	SSPPLPVL	SSPPLPVL	2	183.863	61.2951		b	2	4		1953.79
405.242	231.17	y2^1	Q9DBB1	Dusp6	SSPPLPVL	SSPPLPVL	2	710.619	61.2951		y	1	2		1953.79
405.242	290.16	b6^2	Q9DBB1	Dusp6	SSPPLPVL	SSPPLPVL	2	1889.62	61.2951		b	2	6		1953.79
405.242	318.21	y6^2	Q9DBB1	Dusp6	SSPPLPVL	SSPPLPVL	2	346.55	61.2951		y	2	6		1953.79
405.242	328.223	y3^1	Q9DBB1	Dusp6	SSPPLPVL	SSPPLPVL	2	3534.89	61.2951		y	1	3		1953.79
405.242	339.695	b7^2	Q9DBB1	Dusp6	SSPPLPVL	SSPPLPVL	2	2703.6	61.2951		b	2	7		1953.79
405.242	482.261	b5^1	Q9DBB1	Dusp6	SSPPLPVL	SSPPLPVL	2	9058.17	61.2951		b	1	5		1953.79
405.242	579.314	b6^1	Q9DBB1	Dusp6	SSPPLPVL	SSPPLPVL	2	2825.9	61.2951		b	1	6		1953.79
405.242	635.413	y6^1	Q9DBB1	Dusp6	SSPPLPVL	SSPPLPVL	2	10000	61.2951		y	1	6		1953.79
405.242	678.382	b7^1	Q9DBB1	Dusp6	SSPPLPVL	SSPPLPVL	2	9350	61.2951		b	1	7		1953.79
405.243	129.102	b1^1	Q9D2R0	Aacs	KIDISKIPNSV	KIDISKIPNSV	3	1431.52	36.7112		b	1	1		1337.6
405.243	357.213	b3^1	Q9D2R0	Aacs	KIDISKIPNSV	KIDISKIPNSV	3	2770.84	36.7112		b	1	3		1337.6
405.243	429.258	y8^2	Q9D2R0	Aacs	KIDISKIPNSV	KIDISKIPNSV	3	4556.12	36.7112		y	2	8		1337.6
405.243	529.298	y5^1	Q9D2R0	Aacs	KIDISKIPNSV	KIDISKIPNSV	3	6113.3	36.7112		y	1	5		1337.6
405.243	657.393	y6^1	Q9D2R0	Aacs	KIDISKIPNSV	KIDISKIPNSV	3	2936.64	36.7112		y	1	6		1337.6
405.243	685.424	b6^1	Q9D2R0	Aacs	KIDISKIPNSV	KIDISKIPNSV	3	4797.78	36.7112		b	1	6		1337.6
405.243	744.425	y7^1	Q9D2R0	Aacs	KIDISKIPNSV	KIDISKIPNSV	3	10000	36.7112		y	1	7		1337.6
405.243	798.508	b7^1	Q9D2R0	Aacs	KIDISKIPNSV	KIDISKIPNSV	3	1294.61	36.7112		b	1	7		1337.6
405.243	857.509	y8^1	Q9D2R0	Aacs	KIDISKIPNSV	KIDISKIPNSV	3	6037.15	36.7112		y	1	8		1337.6
405.243	895.561	b8^1	Q9D2R0	Aacs	KIDISKIPNSV	KIDISKIPNSV	3	2056.52	36.7112		b	1	8		1337.6
405.541	147.071	b3^3	P22437	Ptgs1	FQYRNRIAM	FQYRNRIAM(UniMod:35)	3	4.56898	14.8049		b	3	3		798.105
405.541	148.076	b1^1	P22437	Ptgs1	FQYRNRIAM	FQYRNRIAM(UniMod:35)	3	35.1486	14.8049		b	1	1		798.105
405.541	166.053	y1^1	P22437	Ptgs1	FQYRNRIAM	FQYRNRIAM(UniMod:35)	3	638.42	14.8049		y	1	1		798.105
405.541	237.09	y2^1	P22437	Ptgs1	FQYRNRIAM	FQYRNRIAM(UniMod:35)	3	262.985	14.8049		y	1	2		798.105
405.541	276.134	b2^1	P22437	Ptgs1	FQYRNRIAM	FQYRNRIAM(UniMod:35)	3	1250.04	14.8049		b	1	2		798.105
405.541	298.153	b4^2	P22437	Ptgs1	FQYRNRIAM	FQYRNRIAM(UniMod:35)	3	37.9483	14.8049		b	2	4		798.105
405.541	350.174	y3^1	P22437	Ptgs1	FQYRNRIAM	FQYRNRIAM(UniMod:35)	3	45.8259	14.8049		y	1	3		798.105
405.541	350.526	b8^3	P22437	Ptgs1	FQYRNRIAM	FQYRNRIAM(UniMod:35)	3	114.034	14.8049		b	3	8		798.105
405.541	356.519	y8^3	P22437	Ptgs1	FQYRNRIAM	FQYRNRIAM(UniMod:35)	3	17.7843	14.8049		y	3	8		798.105
405.541	388.713	y6^2	P22437	Ptgs1	FQYRNRIAM	FQYRNRIAM(UniMod:35)	3	188.175	14.8049		y	2	6		798.105
405.541	433.225	b6^2	P22437	Ptgs1	FQYRNRIAM	FQYRNRIAM(UniMod:35)	3	424.762	14.8049		b	2	6		798.105
405.541	439.198	b3^1	P22437	Ptgs1	FQYRNRIAM	FQYRNRIAM(UniMod:35)	3	26.3189	14.8049		b	1	3		798.105
405.541	470.245	y7^2	P22437	Ptgs1	FQYRNRIAM	FQYRNRIAM(UniMod:35)	3	10000	14.8049		y	2	7		798.105
405.541	489.767	b7^2	P22437	Ptgs1	FQYRNRIAM	FQYRNRIAM(UniMod:35)	3	295.992	14.8049		b	2	7		798.105
405.541	506.276	y4^1	P22437	Ptgs1	FQYRNRIAM	FQYRNRIAM(UniMod:35)	3	50.8627	14.8049		y	1	4		798.105
405.541	525.286	b8^2	P22437	Ptgs1	FQYRNRIAM	FQYRNRIAM(UniMod:35)	3	2955.98	14.8049		b	2	8		798.105
405.541	534.274	y8^2	P22437	Ptgs1	FQYRNRIAM	FQYRNRIAM(UniMod:35)	3	9344.13	14.8049		y	2	8		798.105
405.541	595.299	b4^1	P22437	Ptgs1	FQYRNRIAM	FQYRNRIAM(UniMod:35)	3	12.2565	14.8049		b	1	4		798.105
405.541	620.318	y5^1	P22437	Ptgs1	FQYRNRIAM	FQYRNRIAM(UniMod:35)	3	164.211	14.8049		y	1	5		798.105
405.541	709.342	b5^1	P22437	Ptgs1	FQYRNRIAM	FQYRNRIAM(UniMod:35)	3	6.68945	14.8049		b	1	5		798.105
405.703	132.102	y1^1	Q9Z2X1	Hnrnpf	AQATYSGL	AQATYSGL	2	3358.99	25.244		y	1	1		1019.6
405.703	136.074	b3^2	Q9Z2X1	Hnrnpf	AQATYSGL	AQATYSGL	2	1478.39	25.244		b	2	3		1019.6
405.703	189.123	y2^1	Q9Z2X1	Hnrnpf	AQATYSGL	AQATYSGL	2	5055.29	25.244		y	1	2		1019.6
405.703	200.103	b2^1	Q9Z2X1	Hnrnpf	AQATYSGL	AQATYSGL	2	2149.55	25.244		b	1	2		1019.6
405.703	271.14	b3^1	Q9Z2X1	Hnrnpf	AQATYSGL	AQATYSGL	2	1131.69	25.244		b	1	3		1019.6
405.703	276.155	y3^1	Q9Z2X1	Hnrnpf	AQATYSGL	AQATYSGL	2	2933.84	25.244		y	1	3		1019.6
405.703	372.188	b4^1	Q9Z2X1	Hnrnpf	AQATYSGL	AQATYSGL	2	3284.35	25.244		b	1	4		1019.6
405.703	439.219	y4^1	Q9Z2X1	Hnrnpf	AQATYSGL	AQATYSGL	2	4473.05	25.244		y	1	4		1019.6
405.703	535.251	b5^1	Q9Z2X1	Hnrnpf	AQATYSGL	AQATYSGL	2	3172.83	25.244		b	1	5		1019.6
405.703	540.266	y5^1	Q9Z2X1	Hnrnpf	AQATYSGL	AQATYSGL	2	806.068	25.244		y	1	5		1019.6
405.703	611.304	y6^1	Q9Z2X1	Hnrnpf	AQATYSGL	AQATYSGL	2	919.777	25.244		y	1	6		1019.6
405.703	622.283	b6^1	Q9Z2X1	Hnrnpf	AQATYSGL	AQATYSGL	2	1179.67	25.244		b	1	6		1019.6
405.703	679.305	b7^1	Q9Z2X1	Hnrnpf	AQATYSGL	AQATYSGL	2	10000	25.244		b	1	7		1019.6
405.727	147.113	y1^1	P17182	Eno1	AVEHINK	AVEHINK	2	308.571	-6.60823		y	1	1		316.621
405.727	171.113	b2^1	P17182	Eno1	AVEHINK	AVEHINK	2	1793.37	-6.60823		b	1	2		316.621
405.727	256.153	y4^2	P17182	Eno1	AVEHINK	AVEHINK	2	18.0965	-6.60823		y	2	4		316.621
405.727	261.156	y2^1	P17182	Eno1	AVEHINK	AVEHINK	2	1041.53	-6.60823		y	1	2		316.621
405.727	300.155	b3^1	P17182	Eno1	AVEHINK	AVEHINK	2	181.202	-6.60823		b	1	3		316.621
405.727	320.674	y5^2	P17182	Eno1	AVEHINK	AVEHINK	2	485.948	-6.60823		y	2	5		316.621
405.727	370.208	y6^2	P17182	Eno1	AVEHINK	AVEHINK	2	973.561	-6.60823		y	2	6		316.621
405.727	374.24	y3^1	P17182	Eno1	AVEHINK	AVEHINK	2	771.045	-6.60823		y	1	3		316.621
405.727	437.214	b4^1	P17182	Eno1	AVEHINK	AVEHINK	2	750.65	-6.60823		b	1	4		316.621
405.727	511.299	y4^1	P17182	Eno1	AVEHINK	AVEHINK	2	1700.22	-6.60823		y	1	4		316.621
405.727	550.298	b5^1	P17182	Eno1	AVEHINK	AVEHINK	2	1080.87	-6.60823		b	1	5		316.621
405.727	640.341	y5^1	P17182	Eno1	AVEHINK	AVEHINK	2	10000	-6.60823		y	1	5		316.621
405.727	664.341	b6^1	P17182	Eno1	AVEHINK	AVEHINK	2	852.444	-6.60823		b	1	6		316.621
405.727	739.41	y6^1	P17182	Eno1	AVEHINK	AVEHINK	2	553.43	-6.60823		y	1	6		316.621
405.727	213.16	b2^1	Q6R5N8	Tlr13	VINQSHL	VINQSHL	2	1797.18	9.46574		b	1	2		660.828
405.727	269.161	y2^1	Q6R5N8	Tlr13	VINQSHL	VINQSHL	2	644.522	9.46574		y	1	2		660.828
405.727	327.203	b3^1	Q6R5N8	Tlr13	VINQSHL	VINQSHL	2	52.112	9.46574		b	1	3		660.828
405.727	356.193	y3^1	Q6R5N8	Tlr13	VINQSHL	VINQSHL	2	548.666	9.46574		y	1	3		660.828
405.727	484.251	y4^1	Q6R5N8	Tlr13	VINQSHL	VINQSHL	2	518.7	9.46574		y	1	4		660.828
405.727	598.294	y5^1	Q6R5N8	Tlr13	VINQSHL	VINQSHL	2	10000	9.46574		y	1	5		660.828
405.727	679.352	b6^1	Q6R5N8	Tlr13	VINQSHL	VINQSHL	2	109.223	9.46574		b	1	6		660.828
405.727	711.378	y6^1	Q6R5N8	Tlr13	VINQSHL	VINQSHL	2	2347.09	9.46574		y	1	6		660.828
405.903	143.082	b2^1	P61965	Wdr5	AALENDKTIKL	AALENDKTIKL	3	979.909	28.0031		b	1	2		1098.48
405.903	256.166	b3^1	P61965	Wdr5	AALENDKTIKL	AALENDKTIKL	3	48.4123	28.0031		b	1	3		1098.48
405.903	260.197	y2^1	P61965	Wdr5	AALENDKTIKL	AALENDKTIKL	3	398.46	28.0031		y	1	2		1098.48
405.903	358.545	y9^3	P61965	Wdr5	AALENDKTIKL	AALENDKTIKL	3	159.893	28.0031		y	3	9		1098.48
405.903	373.281	y3^1	P61965	Wdr5	AALENDKTIKL	AALENDKTIKL	3	104.704	28.0031		y	1	3		1098.48
405.903	382.224	y10^3	P61965	Wdr5	AALENDKTIKL	AALENDKTIKL	3	88.7027	28.0031		y	3	10		1098.48
405.903	416.25	y7^2	P61965	Wdr5	AALENDKTIKL	AALENDKTIKL	3	185.136	28.0031		y	2	7		1098.48
405.903	474.329	y4^1	P61965	Wdr5	AALENDKTIKL	AALENDKTIKL	3	183.904	28.0031		y	1	4		1098.48
405.903	480.772	y8^2	P61965	Wdr5	AALENDKTIKL	AALENDKTIKL	3	1138.53	28.0031		y	2	8		1098.48
405.903	537.314	y9^2	P61965	Wdr5	AALENDKTIKL	AALENDKTIKL	3	10000	28.0031		y	2	9		1098.48
405.903	572.832	y10^2	P61965	Wdr5	AALENDKTIKL	AALENDKTIKL	3	2042.12	28.0031		y	2	10		1098.48
405.903	602.424	y5^1	P61965	Wdr5	AALENDKTIKL	AALENDKTIKL	3	148.481	28.0031		y	1	5		1098.48
405.903	717.451	y6^1	P61965	Wdr5	AALENDKTIKL	AALENDKTIKL	3	216.049	28.0031		y	1	6		1098.48
405.903	831.493	y7^1	P61965	Wdr5	AALENDKTIKL	AALENDKTIKL	3	1035.74	28.0031		y	1	7		1098.48
405.903	960.536	y8^1	P61965	Wdr5	AALENDKTIKL	AALENDKTIKL	3	382.79	28.0031		y	1	8		1098.48
405.908	125.065	b2^2	iRT-pepK		TFIIDPAAVIR	TFIIDPAAVIR	3	1908.7	70.2991		b	2	2		2173.56
405.908	175.119	y1^1	iRT-pepK		TFIIDPAAVIR	TFIIDPAAVIR	3	502.166	70.2991		y	1	1		2173.56
405.908	177.12	y5^3	iRT-pepK		TFIIDPAAVIR	TFIIDPAAVIR	3	3418.76	70.2991		y	3	5		2173.56
405.908	229.658	y4^2	iRT-pepK		TFIIDPAAVIR	TFIIDPAAVIR	3	272.266	70.2991		y	2	4		2173.56
405.908	249.123	b2^1	iRT-pepK		TFIIDPAAVIR	TFIIDPAAVIR	3	1913.79	70.2991		b	1	2		2173.56
405.908	277.153	b8^3	iRT-pepK		TFIIDPAAVIR	TFIIDPAAVIR	3	299.091	70.2991		b	3	8		2173.56
405.908	288.203	y2^1	iRT-pepK		TFIIDPAAVIR	TFIIDPAAVIR	3	1285.24	70.2991		y	1	2		2173.56
405.908	313.703	y6^2	iRT-pepK		TFIIDPAAVIR	TFIIDPAAVIR	3	716.423	70.2991		y	2	6		2173.56
405.908	344.189	b6^2	iRT-pepK		TFIIDPAAVIR	TFIIDPAAVIR	3	361.042	70.2991		b	2	6		2173.56
405.908	362.207	b3^1	iRT-pepK		TFIIDPAAVIR	TFIIDPAAVIR	3	1052.03	70.2991		b	1	3		2173.56
405.908	371.216	y7^2	iRT-pepK		TFIIDPAAVIR	TFIIDPAAVIR	3	157.126	70.2991		y	2	7		2173.56
405.908	379.708	b7^2	iRT-pepK		TFIIDPAAVIR	TFIIDPAAVIR	3	270.841	70.2991		b	2	7		2173.56
405.908	387.271	y3^1	iRT-pepK		TFIIDPAAVIR	TFIIDPAAVIR	3	2795.85	70.2991		y	1	3		2173.56
405.908	458.309	y4^1	iRT-pepK		TFIIDPAAVIR	TFIIDPAAVIR	3	10000	70.2991		y	1	4		2173.56
405.908	484.3	y9^2	iRT-pepK		TFIIDPAAVIR	TFIIDPAAVIR	3	852.08	70.2991		y	2	9		2173.56
405.908	529.346	y5^1	iRT-pepK		TFIIDPAAVIR	TFIIDPAAVIR	3	2070.9	70.2991		y	1	5		2173.56
405.908	590.318	b5^1	iRT-pepK		TFIIDPAAVIR	TFIIDPAAVIR	3	2562.39	70.2991		b	1	5		2173.56
405.908	626.398	y6^1	iRT-pepK		TFIIDPAAVIR	TFIIDPAAVIR	3	1348.94	70.2991		y	1	6		2173.56
405.908	687.371	b6^1	iRT-pepK		TFIIDPAAVIR	TFIIDPAAVIR	3	1622.66	70.2991		b	1	6		2173.56
405.908	741.425	y7^1	iRT-pepK		TFIIDPAAVIR	TFIIDPAAVIR	3	2148.55	70.2991		y	1	7		2173.56
405.908	758.408	b7^1	iRT-pepK		TFIIDPAAVIR	TFIIDPAAVIR	3	898.361	70.2991		b	1	7		2173.56
405.908	854.509	y8^1	iRT-pepK		TFIIDPAAVIR	TFIIDPAAVIR	3	275.706	70.2991		y	1	8		2173.56
406.195	132.102	y1^1	Q61490	Alcam	SSPSFSSL	SSPSFSSL	2	6179.63	42.1411		y	1	1		1480.61
406.195	175.071	b2^1	Q61490	Alcam	SSPSFSSL	SSPSFSSL	2	5306.34	42.1411		b	1	2		1480.61
406.195	219.134	y2^1	Q61490	Alcam	SSPSFSSL	SSPSFSSL	2	5799.9	42.1411		y	1	2		1480.61
406.195	272.124	b3^1	Q61490	Alcam	SSPSFSSL	SSPSFSSL	2	360.281	42.1411		b	1	3		1480.61
406.195	297.132	b6^2	Q61490	Alcam	SSPSFSSL	SSPSFSSL	2	119.007	42.1411		b	2	6		1480.61
406.195	306.166	y3^1	Q61490	Alcam	SSPSFSSL	SSPSFSSL	2	3591.75	42.1411		y	1	3		1480.61
406.195	319.163	y6^2	Q61490	Alcam	SSPSFSSL	SSPSFSSL	2	698.41	42.1411		y	2	6		1480.61
406.195	340.648	b7^2	Q61490	Alcam	SSPSFSSL	SSPSFSSL	2	71.6765	42.1411		b	2	7		1480.61
406.195	359.156	b4^1	Q61490	Alcam	SSPSFSSL	SSPSFSSL	2	831.458	42.1411		b	1	4		1480.61
406.195	453.234	y4^1	Q61490	Alcam	SSPSFSSL	SSPSFSSL	2	1024.59	42.1411		y	1	4		1480.61
406.195	506.225	b5^1	Q61490	Alcam	SSPSFSSL	SSPSFSSL	2	5208.54	42.1411		b	1	5		1480.61
406.195	540.266	y5^1	Q61490	Alcam	SSPSFSSL	SSPSFSSL	2	72.6761	42.1411		y	1	5		1480.61
406.195	593.257	b6^1	Q61490	Alcam	SSPSFSSL	SSPSFSSL	2	3027.58	42.1411		b	1	6		1480.61
406.195	637.319	y6^1	Q61490	Alcam	SSPSFSSL	SSPSFSSL	2	10000	42.1411		y	1	6		1480.61
406.195	680.289	b7^1	Q61490	Alcam	SSPSFSSL	SSPSFSSL	2	4418.13	42.1411		b	1	7		1480.61
406.195	724.351	y7^1	Q61490	Alcam	SSPSFSSL	SSPSFSSL	2	92.9052	42.1411		y	1	7		1480.61
406.201	147.113	y1^1	P43277	H1-3	GTGASGSFK	GTGASGSFK	2	62.6855	-2.48846		y	1	1		382.598
406.201	159.076	b2^1	P43277	H1-3	GTGASGSFK	GTGASGSFK	2	1223.29	-2.48846		b	1	2		382.598
406.201	216.098	b6^2	P43277	H1-3	GTGASGSFK	GTGASGSFK	2	384.937	-2.48846		b	2	6		382.598
406.201	263.137	y5^2	P43277	H1-3	GTGASGSFK	GTGASGSFK	2	206.795	-2.48846		y	2	5		382.598
406.201	287.135	b4^1	P43277	H1-3	GTGASGSFK	GTGASGSFK	2	595.511	-2.48846		b	1	4		382.598
406.201	294.181	y2^1	P43277	H1-3	GTGASGSFK	GTGASGSFK	2	200.924	-2.48846		y	1	2		382.598
406.201	327.166	y7^2	P43277	H1-3	GTGASGSFK	GTGASGSFK	2	62.3206	-2.48846		y	2	7		382.598
406.201	377.69	y8^2	P43277	H1-3	GTGASGSFK	GTGASGSFK	2	324.756	-2.48846		y	2	8		382.598
406.201	381.213	y3^1	P43277	H1-3	GTGASGSFK	GTGASGSFK	2	269.086	-2.48846		y	1	3		382.598
406.201	438.235	y4^1	P43277	H1-3	GTGASGSFK	GTGASGSFK	2	1121.58	-2.48846		y	1	4		382.598
406.201	525.267	y5^1	P43277	H1-3	GTGASGSFK	GTGASGSFK	2	3024.38	-2.48846		y	1	5		382.598
406.201	596.304	y6^1	P43277	H1-3	GTGASGSFK	GTGASGSFK	2	689.916	-2.48846		y	1	6		382.598
406.201	653.325	y7^1	P43277	H1-3	GTGASGSFK	GTGASGSFK	2	10000	-2.48846		y	1	7		382.598
406.205	120.066	y1^1	Q80HV2	VITF3L	IGMFNLT	IGM(UniMod:35)FNLT	2	7325.56	48.059		y	1	1		1626.04
406.205	171.113	b2^1	Q80HV2	VITF3L	IGMFNLT	IGM(UniMod:35)FNLT	2	359.55	48.059		b	1	2		1626.04
406.205	233.15	y2^1	Q80HV2	VITF3L	IGMFNLT	IGM(UniMod:35)FNLT	2	1524.35	48.059		y	1	2		1626.04
406.205	290.133	b5^2	Q80HV2	VITF3L	IGMFNLT	IGM(UniMod:35)FNLT	2	324.217	48.059		b	2	5		1626.04
406.205	318.148	b3^1	Q80HV2	VITF3L	IGMFNLT	IGM(UniMod:35)FNLT	2	1376.87	48.059		b	1	3		1626.04
406.205	346.675	b6^2	Q80HV2	VITF3L	IGMFNLT	IGM(UniMod:35)FNLT	2	190.738	48.059		b	2	6		1626.04
406.205	347.193	y3^1	Q80HV2	VITF3L	IGMFNLT	IGM(UniMod:35)FNLT	2	191.744	48.059		y	1	3		1626.04
406.205	465.217	b4^1	Q80HV2	VITF3L	IGMFNLT	IGM(UniMod:35)FNLT	2	826.604	48.059		b	1	4		1626.04
406.205	494.261	y4^1	Q80HV2	VITF3L	IGMFNLT	IGM(UniMod:35)FNLT	2	189.009	48.059		y	1	4		1626.04
406.205	579.26	b5^1	Q80HV2	VITF3L	IGMFNLT	IGM(UniMod:35)FNLT	2	9501.1	48.059		b	1	5		1626.04
406.205	692.344	b6^1	Q80HV2	VITF3L	IGMFNLT	IGM(UniMod:35)FNLT	2	10000	48.059		b	1	6		1626.04
406.205	698.318	y6^1	Q80HV2	VITF3L	IGMFNLT	IGM(UniMod:35)FNLT	2	767.181	48.059		y	1	6		1626.04
406.205	120.066	y1^1	Q8R4W6	Pcolce2	FTCGGILT	FTCGGILT	2	7545.42	47.7894		y	1	1		1619.6
406.205	233.15	y2^1	Q8R4W6	Pcolce2	FTCGGILT	FTCGGILT	2	1358.71	47.7894		y	1	2		1619.6
406.205	290.133	b6^2	Q8R4W6	Pcolce2	FTCGGILT	FTCGGILT	2	932.73	47.7894		b	2	6		1619.6
406.205	346.675	b7^2	Q8R4W6	Pcolce2	FTCGGILT	FTCGGILT	2	595.232	47.7894		b	2	7		1619.6
406.205	352.133	b3^1	Q8R4W6	Pcolce2	FTCGGILT	FTCGGILT	2	627.636	47.7894		b	1	3		1619.6
406.205	409.154	b4^1	Q8R4W6	Pcolce2	FTCGGILT	FTCGGILT	2	130.589	47.7894		b	1	4		1619.6
406.205	466.175	b5^1	Q8R4W6	Pcolce2	FTCGGILT	FTCGGILT	2	878.328	47.7894		b	1	5		1619.6
406.205	579.26	b6^1	Q8R4W6	Pcolce2	FTCGGILT	FTCGGILT	2	7510.75	47.7894		b	1	6		1619.6
406.205	664.333	y7^1	Q8R4W6	Pcolce2	FTCGGILT	FTCGGILT	2	431.041	47.7894		y	1	7		1619.6
406.205	692.344	b7^1	Q8R4W6	Pcolce2	FTCGGILT	FTCGGILT	2	10000	47.7894		b	1	7		1619.6
406.21	166.053	y1^1	P47963	Rpl13	AFASLRM	AFASLRM(UniMod:35)	2	126.654	19.5202		y	1	1		920.425
406.21	189.095	b4^2	P47963	Rpl13	AFASLRM	AFASLRM(UniMod:35)	2	14.6407	19.5202		b	2	4		920.425
406.21	219.113	b2^1	P47963	Rpl13	AFASLRM	AFASLRM(UniMod:35)	2	2181.05	19.5202		b	1	2		920.425
406.21	261.639	y4^2	P47963	Rpl13	AFASLRM	AFASLRM(UniMod:35)	2	6.86252	19.5202		y	2	4		920.425
406.21	290.15	b3^1	P47963	Rpl13	AFASLRM	AFASLRM(UniMod:35)	2	429.124	19.5202		b	1	3		920.425
406.21	297.157	y5^2	P47963	Rpl13	AFASLRM	AFASLRM(UniMod:35)	2	78.5598	19.5202		y	2	5		920.425
406.21	322.154	y2^1	P47963	Rpl13	AFASLRM	AFASLRM(UniMod:35)	2	189.075	19.5202		y	1	2		920.425
406.21	370.692	y6^2	P47963	Rpl13	AFASLRM	AFASLRM(UniMod:35)	2	207.317	19.5202		y	2	6		920.425
406.21	377.182	b4^1	P47963	Rpl13	AFASLRM	AFASLRM(UniMod:35)	2	101.94	19.5202		b	1	4		920.425
406.21	435.238	y3^1	P47963	Rpl13	AFASLRM	AFASLRM(UniMod:35)	2	476.536	19.5202		y	1	3		920.425
406.21	490.266	b5^1	P47963	Rpl13	AFASLRM	AFASLRM(UniMod:35)	2	28.6829	19.5202		b	1	5		920.425
406.21	522.27	y4^1	P47963	Rpl13	AFASLRM	AFASLRM(UniMod:35)	2	2822.96	19.5202		y	1	4		920.425
406.21	593.308	y5^1	P47963	Rpl13	AFASLRM	AFASLRM(UniMod:35)	2	10000	19.5202		y	1	5		920.425
406.21	646.367	b6^1	P47963	Rpl13	AFASLRM	AFASLRM(UniMod:35)	2	230.487	19.5202		b	1	6		920.425
406.21	740.376	y6^1	P47963	Rpl13	AFASLRM	AFASLRM(UniMod:35)	2	298.969	19.5202		y	1	6		920.425
406.21	175.119	y1^1	P16858	Gapdh	LTGMAFR	LTGM(UniMod:35)AFR	2	634.773	14.3185		y	1	1		784.578
406.21	215.139	b2^1	P16858	Gapdh	LTGMAFR	LTGM(UniMod:35)AFR	2	1113.99	14.3185		b	1	2		784.578
406.21	349.668	y6^2	P16858	Gapdh	LTGMAFR	LTGM(UniMod:35)AFR	2	298.99	14.3185		y	2	6		784.578
406.21	393.224	y3^1	P16858	Gapdh	LTGMAFR	LTGM(UniMod:35)AFR	2	1558.92	14.3185		y	1	3		784.578
406.21	540.26	y4^1	P16858	Gapdh	LTGMAFR	LTGM(UniMod:35)AFR	2	557.469	14.3185		y	1	4		784.578
406.21	597.281	y5^1	P16858	Gapdh	LTGMAFR	LTGM(UniMod:35)AFR	2	7489.73	14.3185		y	1	5		784.578
406.21	698.329	y6^1	P16858	Gapdh	LTGMAFR	LTGM(UniMod:35)AFR	2	10000	14.3185		y	1	6		784.578
406.219	132.102	y1^1	G5E829	Atp2b1	PTDKHTL	PTDKHTL	2	657.17	-1.42966		y	1	1		398.993
406.219	199.108	b2^1	G5E829	Atp2b1	PTDKHTL	PTDKHTL	2	1307.02	-1.42966		b	1	2		398.993
406.219	233.15	y2^1	G5E829	Atp2b1	PTDKHTL	PTDKHTL	2	2930.65	-1.42966		y	1	2		398.993
406.219	290.148	b5^2	G5E829	Atp2b1	PTDKHTL	PTDKHTL	2	210.83	-1.42966		b	2	5		398.993
406.219	314.135	b3^1	G5E829	Atp2b1	PTDKHTL	PTDKHTL	2	779.725	-1.42966		b	1	3		398.993
406.219	340.672	b6^2	G5E829	Atp2b1	PTDKHTL	PTDKHTL	2	4150.28	-1.42966		b	2	6		398.993
406.219	357.693	y6^2	G5E829	Atp2b1	PTDKHTL	PTDKHTL	2	318.372	-1.42966		y	2	6		398.993
406.219	370.208	y3^1	G5E829	Atp2b1	PTDKHTL	PTDKHTL	2	2439.08	-1.42966		y	1	3		398.993
406.219	442.23	b4^1	G5E829	Atp2b1	PTDKHTL	PTDKHTL	2	2088.97	-1.42966		b	1	4		398.993
406.219	498.303	y4^1	G5E829	Atp2b1	PTDKHTL	PTDKHTL	2	884.431	-1.42966		y	1	4		398.993
406.219	579.289	b5^1	G5E829	Atp2b1	PTDKHTL	PTDKHTL	2	1169.75	-1.42966		b	1	5		398.993
406.219	613.33	y5^1	G5E829	Atp2b1	PTDKHTL	PTDKHTL	2	6868.99	-1.42966		y	1	5		398.993
406.219	680.336	b6^1	G5E829	Atp2b1	PTDKHTL	PTDKHTL	2	663.226	-1.42966		b	1	6		398.993
406.219	714.378	y6^1	G5E829	Atp2b1	PTDKHTL	PTDKHTL	2	10000	-1.42966		y	1	6		398.993
406.237	132.102	y1^1	Q99PP2	Znf318	PAQANVVL	PAQANVVL	2	4005.24	43.365		y	1	1		1511.22
406.237	169.097	b2^1	Q99PP2	Znf318	PAQANVVL	PAQANVVL	2	173.662	43.365		b	1	2		1511.22
406.237	231.17	y2^1	Q99PP2	Znf318	PAQANVVL	PAQANVVL	2	1716.47	43.365		y	1	2		1511.22
406.237	291.156	b6^2	Q99PP2	Znf318	PAQANVVL	PAQANVVL	2	554.506	43.365		b	2	6		1511.22
406.237	297.156	b3^1	Q99PP2	Znf318	PAQANVVL	PAQANVVL	2	242.495	43.365		b	1	3		1511.22
406.237	340.69	b7^2	Q99PP2	Znf318	PAQANVVL	PAQANVVL	2	254.721	43.365		b	2	7		1511.22
406.237	482.236	b5^1	Q99PP2	Znf318	PAQANVVL	PAQANVVL	2	175.965	43.365		b	1	5		1511.22
406.237	515.319	y5^1	Q99PP2	Znf318	PAQANVVL	PAQANVVL	2	200.09	43.365		y	1	5		1511.22
406.237	581.304	b6^1	Q99PP2	Znf318	PAQANVVL	PAQANVVL	2	4604.49	43.365		b	1	6		1511.22
406.237	680.373	b7^1	Q99PP2	Znf318	PAQANVVL	PAQANVVL	2	10000	43.365		b	1	7		1511.22
406.246	384.235	b4^1	Q8C754	Vps52	AVRGKLGELVDGLVVP	AVRGKLGELVDGLVVP	4	351.381	66.4221		b	1	4		2080.51
406.246	406.243	b8^2	Q8C754	Vps52	AVRGKLGELVDGLVVP	AVRGKLGELVDGLVVP	4	10000	66.4221		b	2	8		2080.51
406.264	227.175	b2^1	Q9QXK7	Cpsf3	IILEFKGRKI	IILEFKGRKI	3	1100.98	33.8125		b	1	2		1273.71
406.264	374.745	y6^2	Q9QXK7	Cpsf3	IILEFKGRKI	IILEFKGRKI	3	150.36	33.8125		y	2	6		1273.71
406.264	439.266	y7^2	Q9QXK7	Cpsf3	IILEFKGRKI	IILEFKGRKI	3	940.163	33.8125		y	2	7		1273.71
406.264	469.302	b4^1	Q9QXK7	Cpsf3	IILEFKGRKI	IILEFKGRKI	3	79.4048	33.8125		b	1	4		1273.71
406.264	473.319	y4^1	Q9QXK7	Cpsf3	IILEFKGRKI	IILEFKGRKI	3	1566.4	33.8125		y	1	4		1273.71
406.264	495.808	y8^2	Q9QXK7	Cpsf3	IILEFKGRKI	IILEFKGRKI	3	10000	33.8125		y	2	8		1273.71
406.264	552.35	y9^2	Q9QXK7	Cpsf3	IILEFKGRKI	IILEFKGRKI	3	1874.68	33.8125		y	2	9		1273.71
406.264	601.414	y5^1	Q9QXK7	Cpsf3	IILEFKGRKI	IILEFKGRKI	3	458.009	33.8125		y	1	5		1273.71
406.264	748.483	y6^1	Q9QXK7	Cpsf3	IILEFKGRKI	IILEFKGRKI	3	909.68	33.8125		y	1	6		1273.71
406.268	118.086	y1^1	Q9DCH4	Eif3f	PVILASIV	PVILASIV	2	3025.82	72.2225		y	1	1		2223.58
406.268	197.128	b2^1	Q9DCH4	Eif3f	PVILASIV	PVILASIV	2	1024.25	72.2225		b	1	2		2223.58
406.268	231.17	y2^1	Q9DCH4	Eif3f	PVILASIV	PVILASIV	2	3137.86	72.2225		y	1	2		2223.58
406.268	310.213	b3^1	Q9DCH4	Eif3f	PVILASIV	PVILASIV	2	1263.09	72.2225		b	1	3		2223.58
406.268	347.729	b7^2	Q9DCH4	Eif3f	PVILASIV	PVILASIV	2	386.692	72.2225		b	2	7		2223.58
406.268	423.297	b4^1	Q9DCH4	Eif3f	PVILASIV	PVILASIV	2	2748.1	72.2225		b	1	4		2223.58
406.268	494.334	b5^1	Q9DCH4	Eif3f	PVILASIV	PVILASIV	2	169.657	72.2225		b	1	5		2223.58
406.268	581.366	b6^1	Q9DCH4	Eif3f	PVILASIV	PVILASIV	2	10000	72.2225		b	1	6		2223.58
406.268	694.45	b7^1	Q9DCH4	Eif3f	PVILASIV	PVILASIV	2	3646.54	72.2225		b	1	7		2223.58
406.682	116.071	y1^1	Q9EPL8	Ipo7	SSFNFGGP	SSFNFGGP	2	10000	43.3732		y	1	1		1511.47
406.682	173.092	y2^1	Q9EPL8	Ipo7	SSFNFGGP	SSFNFGGP	2	6100.7	43.3732		y	1	2		1511.47
406.682	175.071	b2^1	Q9EPL8	Ipo7	SSFNFGGP	SSFNFGGP	2	1448.07	43.3732		b	1	2		1511.47
406.682	230.114	y3^1	Q9EPL8	Ipo7	SSFNFGGP	SSFNFGGP	2	1740.99	43.3732		y	1	3		1511.47
406.682	320.64	b6^2	Q9EPL8	Ipo7	SSFNFGGP	SSFNFGGP	2	118.865	43.3732		b	2	6		1511.47
406.682	322.14	b3^1	Q9EPL8	Ipo7	SSFNFGGP	SSFNFGGP	2	417	43.3732		b	1	3		1511.47
406.682	349.151	b7^2	Q9EPL8	Ipo7	SSFNFGGP	SSFNFGGP	2	447.181	43.3732		b	2	7		1511.47
406.682	363.166	y7^2	Q9EPL8	Ipo7	SSFNFGGP	SSFNFGGP	2	26.6319	43.3732		y	2	7		1511.47
406.682	377.182	y4^1	Q9EPL8	Ipo7	SSFNFGGP	SSFNFGGP	2	3675.9	43.3732		y	1	4		1511.47
406.682	436.183	b4^1	Q9EPL8	Ipo7	SSFNFGGP	SSFNFGGP	2	2800.09	43.3732		b	1	4		1511.47
406.682	491.225	y5^1	Q9EPL8	Ipo7	SSFNFGGP	SSFNFGGP	2	861.447	43.3732		y	1	5		1511.47
406.682	583.251	b5^1	Q9EPL8	Ipo7	SSFNFGGP	SSFNFGGP	2	2362.52	43.3732		b	1	5		1511.47
406.682	638.293	y6^1	Q9EPL8	Ipo7	SSFNFGGP	SSFNFGGP	2	1438.75	43.3732		y	1	6		1511.47
406.682	640.273	b6^1	Q9EPL8	Ipo7	SSFNFGGP	SSFNFGGP	2	1147.04	43.3732		b	1	6		1511.47
406.682	697.294	b7^1	Q9EPL8	Ipo7	SSFNFGGP	SSFNFGGP	2	2892.25	43.3732		b	1	7		1511.47
406.682	725.325	y7^1	Q9EPL8	Ipo7	SSFNFGGP	SSFNFGGP	2	75.2744	43.3732		y	1	7		1511.47
406.695	166.086	y1^1	P68609	RPO22	SDLFPSF	SDLFPSF	2	6678.79	72.7634		y	1	1		2237.21
406.695	203.066	b2^1	P68609	RPO22	SDLFPSF	SDLFPSF	2	1986.81	72.7634		b	1	2		2237.21
406.695	253.118	y2^1	P68609	RPO22	SDLFPSF	SDLFPSF	2	2195.43	72.7634		y	1	2		2237.21
406.695	316.15	b3^1	P68609	RPO22	SDLFPSF	SDLFPSF	2	7353.55	72.7634		b	1	3		2237.21
406.695	324.155	b6^2	P68609	RPO22	SDLFPSF	SDLFPSF	2	191.396	72.7634		b	2	6		2237.21
406.695	350.171	y3^1	P68609	RPO22	SDLFPSF	SDLFPSF	2	10000	72.7634		y	1	3		2237.21
406.695	463.219	b4^1	P68609	RPO22	SDLFPSF	SDLFPSF	2	6872.72	72.7634		b	1	4		2237.21
406.695	497.239	y4^1	P68609	RPO22	SDLFPSF	SDLFPSF	2	481.793	72.7634		y	1	4		2237.21
406.695	560.271	b5^1	P68609	RPO22	SDLFPSF	SDLFPSF	2	2403.68	72.7634		b	1	5		2237.21
406.695	610.324	y5^1	P68609	RPO22	SDLFPSF	SDLFPSF	2	602.297	72.7634		y	1	5		2237.21
406.695	647.304	b6^1	P68609	RPO22	SDLFPSF	SDLFPSF	2	2595.83	72.7634		b	1	6		2237.21
406.766	132.102	y1^1	Q91X78	Erlin1	AAVVGLVAI	AAVVGLVAI	2	3869.96	69.1666		y	1	1		2147.2
406.766	143.082	b2^1	Q91X78	Erlin1	AAVVGLVAI	AAVVGLVAI	2	760.024	69.1666		b	1	2		2147.2
406.766	171.113	b4^2	Q91X78	Erlin1	AAVVGLVAI	AAVVGLVAI	2	1314.08	69.1666		b	2	4		2147.2
406.766	203.139	y2^1	Q91X78	Erlin1	AAVVGLVAI	AAVVGLVAI	2	3830.14	69.1666		y	1	2		2147.2
406.766	242.15	b3^1	Q91X78	Erlin1	AAVVGLVAI	AAVVGLVAI	2	1755.55	69.1666		b	1	3		2147.2
406.766	256.166	b6^2	Q91X78	Erlin1	AAVVGLVAI	AAVVGLVAI	2	512.277	69.1666		b	2	6		2147.2
406.766	302.207	y3^1	Q91X78	Erlin1	AAVVGLVAI	AAVVGLVAI	2	2231.15	69.1666		y	1	3		2147.2
406.766	341.218	b4^1	Q91X78	Erlin1	AAVVGLVAI	AAVVGLVAI	2	3067.39	69.1666		b	1	4		2147.2
406.766	371.247	y8^2	Q91X78	Erlin1	AAVVGLVAI	AAVVGLVAI	2	97.6962	69.1666		y	2	8		2147.2
406.766	398.24	b5^1	Q91X78	Erlin1	AAVVGLVAI	AAVVGLVAI	2	1015.01	69.1666		b	1	5		2147.2
406.766	415.291	y4^1	Q91X78	Erlin1	AAVVGLVAI	AAVVGLVAI	2	154.991	69.1666		y	1	4		2147.2
406.766	472.313	y5^1	Q91X78	Erlin1	AAVVGLVAI	AAVVGLVAI	2	1219.02	69.1666		y	1	5		2147.2
406.766	511.324	b6^1	Q91X78	Erlin1	AAVVGLVAI	AAVVGLVAI	2	10000	69.1666		b	1	6		2147.2
406.766	571.381	y6^1	Q91X78	Erlin1	AAVVGLVAI	AAVVGLVAI	2	1117.32	69.1666		y	1	6		2147.2
406.766	610.392	b7^1	Q91X78	Erlin1	AAVVGLVAI	AAVVGLVAI	2	5218.28	69.1666		b	1	7		2147.2
406.766	670.45	y7^1	Q91X78	Erlin1	AAVVGLVAI	AAVVGLVAI	2	521.048	69.1666		y	1	7		2147.2
406.766	681.429	b8^1	Q91X78	Erlin1	AAVVGLVAI	AAVVGLVAI	2	4769.06	69.1666		b	1	8		2147.2
406.879	138.066	b1^1	P01863	Ighg	HTTKSFSRTPG	HTTKSFSRTPG	3	76.3501	-8.60719		b	1	1		289.805
406.879	173.092	y2^1	P01863	Ighg	HTTKSFSRTPG	HTTKSFSRTPG	3	1709.76	-8.60719		y	1	2		289.805
406.879	234.632	b4^2	P01863	Ighg	HTTKSFSRTPG	HTTKSFSRTPG	3	464.481	-8.60719		b	2	4		289.805
406.879	239.114	b2^1	P01863	Ighg	HTTKSFSRTPG	HTTKSFSRTPG	3	2177.01	-8.60719		b	1	2		289.805
406.879	274.14	y3^1	P01863	Ighg	HTTKSFSRTPG	HTTKSFSRTPG	3	394.481	-8.60719		y	1	3		289.805
406.879	278.148	b5^2	P01863	Ighg	HTTKSFSRTPG	HTTKSFSRTPG	3	487.662	-8.60719		b	2	5		289.805
406.879	332.674	y6^2	P01863	Ighg	HTTKSFSRTPG	HTTKSFSRTPG	3	711.097	-8.60719		y	2	6		289.805
406.879	340.162	b3^1	P01863	Ighg	HTTKSFSRTPG	HTTKSFSRTPG	3	559.263	-8.60719		b	1	3		289.805
406.879	351.682	b6^2	P01863	Ighg	HTTKSFSRTPG	HTTKSFSRTPG	3	609.274	-8.60719		b	2	6		289.805
406.879	376.19	y7^2	P01863	Ighg	HTTKSFSRTPG	HTTKSFSRTPG	3	609.136	-8.60719		y	2	7		289.805
406.879	381.868	b10^3	P01863	Ighg	HTTKSFSRTPG	HTTKSFSRTPG	3	317.441	-8.60719		b	3	10		289.805
406.879	395.198	b7^2	P01863	Ighg	HTTKSFSRTPG	HTTKSFSRTPG	3	688.931	-8.60719		b	2	7		289.805
406.879	430.241	y4^1	P01863	Ighg	HTTKSFSRTPG	HTTKSFSRTPG	3	988.38	-8.60719		y	1	4		289.805
406.879	440.238	y8^2	P01863	Ighg	HTTKSFSRTPG	HTTKSFSRTPG	3	295.399	-8.60719		y	2	8		289.805
406.879	468.257	b4^1	P01863	Ighg	HTTKSFSRTPG	HTTKSFSRTPG	3	2202.84	-8.60719		b	1	4		289.805
406.879	473.249	b8^2	P01863	Ighg	HTTKSFSRTPG	HTTKSFSRTPG	3	518.302	-8.60719		b	2	8		289.805
406.879	490.762	y9^2	P01863	Ighg	HTTKSFSRTPG	HTTKSFSRTPG	3	767.716	-8.60719		y	2	9		289.805
406.879	517.273	y5^1	P01863	Ighg	HTTKSFSRTPG	HTTKSFSRTPG	3	10000	-8.60719		y	1	5		289.805
406.879	523.773	b9^2	P01863	Ighg	HTTKSFSRTPG	HTTKSFSRTPG	3	123.924	-8.60719		b	2	9		289.805
406.879	541.285	y10^2	P01863	Ighg	HTTKSFSRTPG	HTTKSFSRTPG	3	2494.39	-8.60719		y	2	10		289.805
406.879	555.289	b5^1	P01863	Ighg	HTTKSFSRTPG	HTTKSFSRTPG	3	51.0394	-8.60719		b	1	5		289.805
406.879	664.341	y6^1	P01863	Ighg	HTTKSFSRTPG	HTTKSFSRTPG	3	5750.15	-8.60719		y	1	6		289.805
406.879	751.373	y7^1	P01863	Ighg	HTTKSFSRTPG	HTTKSFSRTPG	3	4007.53	-8.60719		y	1	7		289.805
406.879	879.468	y8^1	P01863	Ighg	HTTKSFSRTPG	HTTKSFSRTPG	3	770.792	-8.60719		y	1	8		289.805
407.218	171.113	b2^1	Q9WTV6	Usp18	AVIAHVGM	AVIAHVGM(UniMod:35)	2	1729.55	13.3634		b	1	2		755.079
407.218	284.197	b3^1	Q9WTV6	Usp18	AVIAHVGM	AVIAHVGM(UniMod:35)	2	491.588	13.3634		b	1	3		755.079
407.218	322.143	y3^1	Q9WTV6	Usp18	AVIAHVGM	AVIAHVGM(UniMod:35)	2	71.6955	13.3634		y	1	3		755.079
407.218	322.165	y6^2	Q9WTV6	Usp18	AVIAHVGM	AVIAHVGM(UniMod:35)	2	1096.98	13.3634		y	2	6		755.079
407.218	371.699	y7^2	Q9WTV6	Usp18	AVIAHVGM	AVIAHVGM(UniMod:35)	2	231.038	13.3634		y	2	7		755.079
407.218	459.202	y4^1	Q9WTV6	Usp18	AVIAHVGM	AVIAHVGM(UniMod:35)	2	761.836	13.3634		y	1	4		755.079
407.218	530.239	y5^1	Q9WTV6	Usp18	AVIAHVGM	AVIAHVGM(UniMod:35)	2	1011.81	13.3634		y	1	5		755.079
407.218	643.323	y6^1	Q9WTV6	Usp18	AVIAHVGM	AVIAHVGM(UniMod:35)	2	10000	13.3634		y	1	6		755.079
407.218	648.383	b7^1	Q9WTV6	Usp18	AVIAHVGM	AVIAHVGM(UniMod:35)	2	569.603	13.3634		b	1	7		755.079
407.218	742.392	y7^1	Q9WTV6	Usp18	AVIAHVGM	AVIAHVGM(UniMod:35)	2	326.519	13.3634		y	1	7		755.079
407.235	118.086	y1^1	Q05910	Adam8	PGPPLPHV	PGPPLPHV	2	130.713	36.3327		y	1	1		1329.56
407.235	155.082	b2^1	Q05910	Adam8	PGPPLPHV	PGPPLPHV	2	2209.49	36.3327		b	1	2		1329.56
407.235	252.134	b3^1	Q05910	Adam8	PGPPLPHV	PGPPLPHV	2	839.051	36.3327		b	1	3		1329.56
407.235	255.145	y2^1	Q05910	Adam8	PGPPLPHV	PGPPLPHV	2	1200.86	36.3327		y	1	2		1329.56
407.235	330.197	y6^2	Q05910	Adam8	PGPPLPHV	PGPPLPHV	2	10000	36.3327		y	2	6		1329.56
407.235	348.695	b7^2	Q05910	Adam8	PGPPLPHV	PGPPLPHV	2	2944.1	36.3327		b	2	7		1329.56
407.235	349.187	b4^1	Q05910	Adam8	PGPPLPHV	PGPPLPHV	2	441.525	36.3327		b	1	4		1329.56
407.235	352.198	y3^1	Q05910	Adam8	PGPPLPHV	PGPPLPHV	2	6828.74	36.3327		y	1	3		1329.56
407.235	462.271	b5^1	Q05910	Adam8	PGPPLPHV	PGPPLPHV	2	3186.63	36.3327		b	1	5		1329.56
407.235	465.282	y4^1	Q05910	Adam8	PGPPLPHV	PGPPLPHV	2	148.266	36.3327		y	1	4		1329.56
407.235	559.324	b6^1	Q05910	Adam8	PGPPLPHV	PGPPLPHV	2	528.321	36.3327		b	1	6		1329.56
407.235	562.335	y5^1	Q05910	Adam8	PGPPLPHV	PGPPLPHV	2	4828.81	36.3327		y	1	5		1329.56
407.235	659.388	y6^1	Q05910	Adam8	PGPPLPHV	PGPPLPHV	2	6596.83	36.3327		y	1	6		1329.56
407.235	696.383	b7^1	Q05910	Adam8	PGPPLPHV	PGPPLPHV	2	725.552	36.3327		b	1	7		1329.56
407.235	716.409	y7^1	Q05910	Adam8	PGPPLPHV	PGPPLPHV	2	6404.71	36.3327		y	1	7		1329.56
407.245	132.102	y1^1	Q8K214	Scmh1	SALKPANL	SALKPANL	2	791.151	20.8298		y	1	1		945.753
407.245	159.076	b2^1	Q8K214	Scmh1	SALKPANL	SALKPANL	2	3141.97	20.8298		b	1	2		945.753
407.245	246.145	y2^1	Q8K214	Scmh1	SALKPANL	SALKPANL	2	682.821	20.8298		y	1	2		945.753
407.245	272.16	b3^1	Q8K214	Scmh1	SALKPANL	SALKPANL	2	748.041	20.8298		b	1	3		945.753
407.245	328.211	y6^2	Q8K214	Scmh1	SALKPANL	SALKPANL	2	517.949	20.8298		y	2	6		945.753
407.245	341.698	b7^2	Q8K214	Scmh1	SALKPANL	SALKPANL	2	185.139	20.8298		b	2	7		945.753
407.245	363.729	y7^2	Q8K214	Scmh1	SALKPANL	SALKPANL	2	145.866	20.8298		y	2	7		945.753
407.245	400.255	b4^1	Q8K214	Scmh1	SALKPANL	SALKPANL	2	488.189	20.8298		b	1	4		945.753
407.245	414.235	y4^1	Q8K214	Scmh1	SALKPANL	SALKPANL	2	2957.61	20.8298		y	1	4		945.753
407.245	542.33	y5^1	Q8K214	Scmh1	SALKPANL	SALKPANL	2	3231.48	20.8298		y	1	5		945.753
407.245	568.345	b6^1	Q8K214	Scmh1	SALKPANL	SALKPANL	2	1536.82	20.8298		b	1	6		945.753
407.245	655.414	y6^1	Q8K214	Scmh1	SALKPANL	SALKPANL	2	10000	20.8298		y	1	6		945.753
407.245	682.388	b7^1	Q8K214	Scmh1	SALKPANL	SALKPANL	2	4033.91	20.8298		b	1	7		945.753
407.245	726.451	y7^1	Q8K214	Scmh1	SALKPANL	SALKPANL	2	863.838	20.8298		y	1	7		945.753
407.276	100.076	b1^1	P04441	Cd74	VSVLVALL	VSVLVALL	2	6.77299	89.3859		b	1	1		2650.99
407.276	132.102	y1^1	P04441	Cd74	VSVLVALL	VSVLVALL	2	9651.08	89.3859		y	1	1		2650.99
407.276	187.108	b2^1	P04441	Cd74	VSVLVALL	VSVLVALL	2	782.402	89.3859		b	1	2		2650.99
407.276	245.186	y2^1	P04441	Cd74	VSVLVALL	VSVLVALL	2	3490.56	89.3859		y	1	2		2650.99
407.276	285.187	b6^2	P04441	Cd74	VSVLVALL	VSVLVALL	2	181.141	89.3859		b	2	6		2650.99
407.276	286.176	b3^1	P04441	Cd74	VSVLVALL	VSVLVALL	2	864.84	89.3859		b	1	3		2650.99
407.276	316.223	y3^1	P04441	Cd74	VSVLVALL	VSVLVALL	2	2770.37	89.3859		y	1	3		2650.99
407.276	341.729	b7^2	P04441	Cd74	VSVLVALL	VSVLVALL	2	825.996	89.3859		b	2	7		2650.99
407.276	399.26	b4^1	P04441	Cd74	VSVLVALL	VSVLVALL	2	3448.33	89.3859		b	1	4		2650.99
407.276	415.291	y4^1	P04441	Cd74	VSVLVALL	VSVLVALL	2	898.34	89.3859		y	1	4		2650.99
407.276	498.329	b5^1	P04441	Cd74	VSVLVALL	VSVLVALL	2	6286.93	89.3859		b	1	5		2650.99
407.276	528.376	y5^1	P04441	Cd74	VSVLVALL	VSVLVALL	2	279.021	89.3859		y	1	5		2650.99
407.276	569.366	b6^1	P04441	Cd74	VSVLVALL	VSVLVALL	2	10000	89.3859		b	1	6		2650.99
407.276	627.444	y6^1	P04441	Cd74	VSVLVALL	VSVLVALL	2	434.208	89.3859		y	1	6		2650.99
407.276	682.45	b7^1	P04441	Cd74	VSVLVALL	VSVLVALL	2	8543.42	89.3859		b	1	7		2650.99
407.276	714.476	y7^1	P04441	Cd74	VSVLVALL	VSVLVALL	2	170.85	89.3859		y	1	7		2650.99
407.704	166.053	y1^1	P24770	VACWR190	VTTFLSM	VTTFLSM(UniMod:35)	2	5605.81	60.891		y	1	1		1941.83
407.704	201.123	b2^1	P24770	VACWR190	VTTFLSM	VTTFLSM(UniMod:35)	2	2700.69	60.891		b	1	2		1941.83
407.704	253.085	y2^1	P24770	VACWR190	VTTFLSM	VTTFLSM(UniMod:35)	2	10000	60.891		y	1	2		1941.83
407.704	302.171	b3^1	P24770	VACWR190	VTTFLSM	VTTFLSM(UniMod:35)	2	706.932	60.891		b	1	3		1941.83
407.704	366.169	y3^1	P24770	VACWR190	VTTFLSM	VTTFLSM(UniMod:35)	2	2267.25	60.891		y	1	3		1941.83
407.704	513.238	y4^1	P24770	VACWR190	VTTFLSM	VTTFLSM(UniMod:35)	2	456.232	60.891		y	1	4		1941.83
407.704	562.324	b5^1	P24770	VACWR190	VTTFLSM	VTTFLSM(UniMod:35)	2	1066.37	60.891		b	1	5		1941.83
407.704	614.285	y5^1	P24770	VACWR190	VTTFLSM	VTTFLSM(UniMod:35)	2	683.269	60.891		y	1	5		1941.83
407.704	649.356	b6^1	P24770	VACWR190	VTTFLSM	VTTFLSM(UniMod:35)	2	1484.7	60.891		b	1	6		1941.83
407.704	715.333	y6^1	P24770	VACWR190	VTTFLSM	VTTFLSM(UniMod:35)	2	1757.01	60.891		y	1	6		1941.83
407.716	166.053	y1^1	Q91VY9	Znf622	VKNVAHM	VKNVAHM(UniMod:35)	2	643.515	6.40318		y	1	1		593.866
407.716	228.171	b2^1	Q91VY9	Znf622	VKNVAHM	VKNVAHM(UniMod:35)	2	3215.88	6.40318		b	1	2		593.866
407.716	303.112	y2^1	Q91VY9	Znf622	VKNVAHM	VKNVAHM(UniMod:35)	2	2013.39	6.40318		y	1	2		593.866
407.716	342.214	b3^1	Q91VY9	Znf622	VKNVAHM	VKNVAHM(UniMod:35)	2	437.595	6.40318		b	1	3		593.866
407.716	358.181	y6^2	Q91VY9	Znf622	VKNVAHM	VKNVAHM(UniMod:35)	2	1343.08	6.40318		y	2	6		593.866
407.716	374.149	y3^1	Q91VY9	Znf622	VKNVAHM	VKNVAHM(UniMod:35)	2	1525.2	6.40318		y	1	3		593.866
407.716	473.218	y4^1	Q91VY9	Znf622	VKNVAHM	VKNVAHM(UniMod:35)	2	971.993	6.40318		y	1	4		593.866
407.716	587.261	y5^1	Q91VY9	Znf622	VKNVAHM	VKNVAHM(UniMod:35)	2	10000	6.40318		y	1	5		593.866
407.716	649.378	b6^1	Q91VY9	Znf622	VKNVAHM	VKNVAHM(UniMod:35)	2	1138.63	6.40318		b	1	6		593.866
407.743	132.102	y1^1	P20152	Vim	SSVPGVRL	SSVPGVRL	2	6.835	31.7153		y	1	1		1220.2
407.743	175.071	b2^1	P20152	Vim	SSVPGVRL	SSVPGVRL	2	299.579	31.7153		b	1	2		1220.2
407.743	271.176	y5^2	P20152	Vim	SSVPGVRL	SSVPGVRL	2	2148.09	31.7153		y	2	5		1220.2
407.743	274.14	b3^1	P20152	Vim	SSVPGVRL	SSVPGVRL	2	702.849	31.7153		b	1	3		1220.2
407.743	288.203	y2^1	P20152	Vim	SSVPGVRL	SSVPGVRL	2	57.2779	31.7153		y	1	2		1220.2
407.743	320.711	y6^2	P20152	Vim	SSVPGVRL	SSVPGVRL	2	434.823	31.7153		y	2	6		1220.2
407.743	342.195	b7^2	P20152	Vim	SSVPGVRL	SSVPGVRL	2	8.31454	31.7153		b	2	7		1220.2
407.743	364.227	y7^2	P20152	Vim	SSVPGVRL	SSVPGVRL	2	5.08084	31.7153		y	2	7		1220.2
407.743	371.193	b4^1	P20152	Vim	SSVPGVRL	SSVPGVRL	2	30.7084	31.7153		b	1	4		1220.2
407.743	387.271	y3^1	P20152	Vim	SSVPGVRL	SSVPGVRL	2	72.563	31.7153		y	1	3		1220.2
407.743	444.293	y4^1	P20152	Vim	SSVPGVRL	SSVPGVRL	2	780.901	31.7153		y	1	4		1220.2
407.743	527.282	b6^1	P20152	Vim	SSVPGVRL	SSVPGVRL	2	37.0955	31.7153		b	1	6		1220.2
407.743	541.346	y5^1	P20152	Vim	SSVPGVRL	SSVPGVRL	2	10000	31.7153		y	1	5		1220.2
407.743	640.414	y6^1	P20152	Vim	SSVPGVRL	SSVPGVRL	2	811.184	31.7153		y	1	6		1220.2
407.743	727.446	y7^1	P20152	Vim	SSVPGVRL	SSVPGVRL	2	145.329	31.7153		y	1	7		1220.2
407.773	132.102	y1^1	P36371	Tap2	SLVKVVGL	SLVKVVGL	2	369.54	48.4407		y	1	1		1636.17
407.773	189.123	y2^1	P36371	Tap2	SLVKVVGL	SLVKVVGL	2	994.858	48.4407		y	1	2		1636.17
407.773	201.123	b2^1	P36371	Tap2	SLVKVVGL	SLVKVVGL	2	2041.01	48.4407		b	1	2		1636.17
407.773	515.355	y5^1	P36371	Tap2	SLVKVVGL	SLVKVVGL	2	1885.56	48.4407		y	1	5		1636.17
407.773	527.355	b5^1	P36371	Tap2	SLVKVVGL	SLVKVVGL	2	351.591	48.4407		b	1	5		1636.17
407.773	614.424	y6^1	P36371	Tap2	SLVKVVGL	SLVKVVGL	2	10000	48.4407		y	1	6		1636.17
407.773	626.424	b6^1	P36371	Tap2	SLVKVVGL	SLVKVVGL	2	2797.33	48.4407		b	1	6		1636.17
408.202	166.086	y1^1	Q91W96	Anapc4	SSMKNFKAFF	SSM(UniMod:35)KNFKAFF	3	6423.71	37.0642		y	1	1		1347.36
408.202	175.071	b2^1	Q91W96	Anapc4	SSMKNFKAFF	SSM(UniMod:35)KNFKAFF	3	954.866	37.0642		b	1	2		1347.36
408.202	313.155	y2^1	Q91W96	Anapc4	SSMKNFKAFF	SSM(UniMod:35)KNFKAFF	3	1930.42	37.0642		y	1	2		1347.36
408.202	450.202	b4^1	Q91W96	Anapc4	SSMKNFKAFF	SSM(UniMod:35)KNFKAFF	3	640.972	37.0642		b	1	4		1347.36
408.202	455.726	b8^2	Q91W96	Anapc4	SSMKNFKAFF	SSM(UniMod:35)KNFKAFF	3	824.036	37.0642		b	2	8		1347.36
408.202	512.287	y4^1	Q91W96	Anapc4	SSMKNFKAFF	SSM(UniMod:35)KNFKAFF	3	892.668	37.0642		y	1	4		1347.36
408.202	524.768	y8^2	Q91W96	Anapc4	SSMKNFKAFF	SSM(UniMod:35)KNFKAFF	3	3152.56	37.0642		y	2	8		1347.36
408.202	529.26	b9^2	Q91W96	Anapc4	SSMKNFKAFF	SSM(UniMod:35)KNFKAFF	3	10000	37.0642		b	2	9		1347.36
408.202	568.284	y9^2	Q91W96	Anapc4	SSMKNFKAFF	SSM(UniMod:35)KNFKAFF	3	3060.61	37.0642		y	2	9		1347.36
408.202	659.355	y5^1	Q91W96	Anapc4	SSMKNFKAFF	SSM(UniMod:35)KNFKAFF	3	1292.84	37.0642		y	1	5		1347.36
408.202	711.313	b6^1	Q91W96	Anapc4	SSMKNFKAFF	SSM(UniMod:35)KNFKAFF	3	1342.81	37.0642		b	1	6		1347.36
408.202	839.408	b7^1	Q91W96	Anapc4	SSMKNFKAFF	SSM(UniMod:35)KNFKAFF	3	1312.85	37.0642		b	1	7		1347.36
408.208	143.082	b2^1	Q61166	Mapre1	AAPKAGPGM	AAPKAGPGM(UniMod:35)	2	860.652	-7.34699		b	1	2		306.653
408.208	166.053	y1^1	Q61166	Mapre1	AAPKAGPGM	AAPKAGPGM(UniMod:35)	2	424.997	-7.34699		y	1	1		306.653
408.208	223.075	y2^1	Q61166	Mapre1	AAPKAGPGM	AAPKAGPGM(UniMod:35)	2	106.431	-7.34699		y	1	2		306.653
408.208	320.127	y3^1	Q61166	Mapre1	AAPKAGPGM	AAPKAGPGM(UniMod:35)	2	257.223	-7.34699		y	1	3		306.653
408.208	337.171	y7^2	Q61166	Mapre1	AAPKAGPGM	AAPKAGPGM(UniMod:35)	2	10000	-7.34699		y	2	7		306.653
408.208	368.229	b4^1	Q61166	Mapre1	AAPKAGPGM	AAPKAGPGM(UniMod:35)	2	71.2521	-7.34699		b	1	4		306.653
408.208	372.689	y8^2	Q61166	Mapre1	AAPKAGPGM	AAPKAGPGM(UniMod:35)	2	153.692	-7.34699		y	2	8		306.653
408.208	377.149	y4^1	Q61166	Mapre1	AAPKAGPGM	AAPKAGPGM(UniMod:35)	2	217.904	-7.34699		y	1	4		306.653
408.208	439.266	b5^1	Q61166	Mapre1	AAPKAGPGM	AAPKAGPGM(UniMod:35)	2	69.3858	-7.34699		b	1	5		306.653
408.208	448.186	y5^1	Q61166	Mapre1	AAPKAGPGM	AAPKAGPGM(UniMod:35)	2	344.519	-7.34699		y	1	5		306.653
408.208	496.288	b6^1	Q61166	Mapre1	AAPKAGPGM	AAPKAGPGM(UniMod:35)	2	54.2236	-7.34699		b	1	6		306.653
408.208	576.281	y6^1	Q61166	Mapre1	AAPKAGPGM	AAPKAGPGM(UniMod:35)	2	620.421	-7.34699		y	1	6		306.653
408.208	593.341	b7^1	Q61166	Mapre1	AAPKAGPGM	AAPKAGPGM(UniMod:35)	2	35.1676	-7.34699		b	1	7		306.653
408.208	650.362	b8^1	Q61166	Mapre1	AAPKAGPGM	AAPKAGPGM(UniMod:35)	2	172.51	-7.34699		b	1	8		306.653
408.208	673.334	y7^1	Q61166	Mapre1	AAPKAGPGM	AAPKAGPGM(UniMod:35)	2	6544.17	-7.34699		y	1	7		306.653
408.208	744.371	y8^1	Q61166	Mapre1	AAPKAGPGM	AAPKAGPGM(UniMod:35)	2	9.00224	-7.34699		y	1	8		306.653
408.217	132.102	y1^1	O88738	Birc6	QSPSANVL	QSPSANVL	2	3563.77	24.8589		y	1	1		1011.28
408.217	231.17	y2^1	O88738	Birc6	QSPSANVL	QSPSANVL	2	981.895	24.8589		y	1	2		1011.28
408.217	236.114	b5^2	O88738	Birc6	QSPSANVL	QSPSANVL	2	343.498	24.8589		b	2	5		1011.28
408.217	293.135	b6^2	O88738	Birc6	QSPSANVL	QSPSANVL	2	411.091	24.8589		b	2	6		1011.28
408.217	313.151	b3^1	O88738	Birc6	QSPSANVL	QSPSANVL	2	512.8	24.8589		b	1	3		1011.28
408.217	342.669	b7^2	O88738	Birc6	QSPSANVL	QSPSANVL	2	1509.66	24.8589		b	2	7		1011.28
408.217	345.213	y3^1	O88738	Birc6	QSPSANVL	QSPSANVL	2	123.066	24.8589		y	1	3		1011.28
408.217	400.183	b4^1	O88738	Birc6	QSPSANVL	QSPSANVL	2	1229.8	24.8589		b	1	4		1011.28
408.217	416.25	y4^1	O88738	Birc6	QSPSANVL	QSPSANVL	2	304.056	24.8589		y	1	4		1011.28
408.217	471.22	b5^1	O88738	Birc6	QSPSANVL	QSPSANVL	2	1240.14	24.8589		b	1	5		1011.28
408.217	585.263	b6^1	O88738	Birc6	QSPSANVL	QSPSANVL	2	10000	24.8589		b	1	6		1011.28
408.217	684.331	b7^1	O88738	Birc6	QSPSANVL	QSPSANVL	2	9248.44	24.8589		b	1	7		1011.28
408.219	203.139	y2^1	Q9CY58	Serbp1	PEAFPALA	PEAFPALA	2	829.322	53.0226		y	1	2		1748.99
408.219	227.103	b2^1	Q9CY58	Serbp1	PEAFPALA	PEAFPALA	2	230.151	53.0226		b	1	2		1748.99
408.219	271.634	b5^2	Q9CY58	Serbp1	PEAFPALA	PEAFPALA	2	290.002	53.0226		b	2	5		1748.99
408.219	298.14	b3^1	Q9CY58	Serbp1	PEAFPALA	PEAFPALA	2	677.716	53.0226		b	1	3		1748.99
408.219	307.153	b6^2	Q9CY58	Serbp1	PEAFPALA	PEAFPALA	2	206.255	53.0226		b	2	6		1748.99
408.219	363.695	b7^2	Q9CY58	Serbp1	PEAFPALA	PEAFPALA	2	1359.54	53.0226		b	2	7		1748.99
408.219	371.229	y4^1	Q9CY58	Serbp1	PEAFPALA	PEAFPALA	2	459.24	53.0226		y	1	4		1748.99
408.219	445.208	b4^1	Q9CY58	Serbp1	PEAFPALA	PEAFPALA	2	1172.97	53.0226		b	1	4		1748.99
408.219	542.261	b5^1	Q9CY58	Serbp1	PEAFPALA	PEAFPALA	2	263.524	53.0226		b	1	5		1748.99
408.219	613.298	b6^1	Q9CY58	Serbp1	PEAFPALA	PEAFPALA	2	10000	53.0226		b	1	6		1748.99
408.219	726.382	b7^1	Q9CY58	Serbp1	PEAFPALA	PEAFPALA	2	1385.7	53.0226		b	1	7		1748.99
408.235	132.102	y1^1	Q9DB34	Chmp2a	ANIQAVSL	ANIQAVSL	2	3466.33	42.8252		y	1	1		1497.29
408.235	186.087	b2^1	Q9DB34	Chmp2a	ANIQAVSL	ANIQAVSL	2	777.395	42.8252		b	1	2		1497.29
408.235	219.134	y2^1	Q9DB34	Chmp2a	ANIQAVSL	ANIQAVSL	2	10000	42.8252		y	1	2		1497.29
408.235	318.202	y3^1	Q9DB34	Chmp2a	ANIQAVSL	ANIQAVSL	2	1096.52	42.8252		y	1	3		1497.29
408.235	389.239	y4^1	Q9DB34	Chmp2a	ANIQAVSL	ANIQAVSL	2	808.5	42.8252		y	1	4		1497.29
408.235	427.23	b4^1	Q9DB34	Chmp2a	ANIQAVSL	ANIQAVSL	2	1799.96	42.8252		b	1	4		1497.29
408.235	498.267	b5^1	Q9DB34	Chmp2a	ANIQAVSL	ANIQAVSL	2	2186.83	42.8252		b	1	5		1497.29
408.235	517.298	y5^1	Q9DB34	Chmp2a	ANIQAVSL	ANIQAVSL	2	218.452	42.8252		y	1	5		1497.29
408.235	597.335	b6^1	Q9DB34	Chmp2a	ANIQAVSL	ANIQAVSL	2	7543.08	42.8252		b	1	6		1497.29
408.235	684.368	b7^1	Q9DB34	Chmp2a	ANIQAVSL	ANIQAVSL	2	6365.27	42.8252		b	1	7		1497.29
408.235	185.128	b2^1	P42932	Cct8	IAGTGANVI	IAGTGANVI	2	827.511	32.3963		b	1	2		1237.03
408.235	231.17	y2^1	P42932	Cct8	IAGTGANVI	IAGTGANVI	2	1740.61	32.3963		y	1	2		1237.03
408.235	242.15	b3^1	P42932	Cct8	IAGTGANVI	IAGTGANVI	2	329.743	32.3963		b	1	3		1237.03
408.235	293.153	b7^2	P42932	Cct8	IAGTGANVI	IAGTGANVI	2	1020.12	32.3963		b	2	7		1237.03
408.235	342.687	b8^2	P42932	Cct8	IAGTGANVI	IAGTGANVI	2	1994.44	32.3963		b	2	8		1237.03
408.235	345.213	y3^1	P42932	Cct8	IAGTGANVI	IAGTGANVI	2	779.744	32.3963		y	1	3		1237.03
408.235	400.219	b5^1	P42932	Cct8	IAGTGANVI	IAGTGANVI	2	968.953	32.3963		b	1	5		1237.03
408.235	471.256	b6^1	P42932	Cct8	IAGTGANVI	IAGTGANVI	2	812.471	32.3963		b	1	6		1237.03
408.235	585.299	b7^1	P42932	Cct8	IAGTGANVI	IAGTGANVI	2	10000	32.3963		b	1	7		1237.03
408.235	631.341	y7^1	P42932	Cct8	IAGTGANVI	IAGTGANVI	2	874.707	32.3963		y	1	7		1237.03
408.235	684.368	b8^1	P42932	Cct8	IAGTGANVI	IAGTGANVI	2	9164.58	32.3963		b	1	8		1237.03
408.235	702.378	y8^1	P42932	Cct8	IAGTGANVI	IAGTGANVI	2	215.153	32.3963		y	1	8		1237.03
408.253	201.123	b2^1	Q99LX0	Park7	VTVAGLAGK	VTVAGLAGK	2	2296.06	21.532		b	1	2		957.161
408.253	204.134	y2^1	Q99LX0	Park7	VTVAGLAGK	VTVAGLAGK	2	289.679	21.532		y	1	2		957.161
408.253	275.171	y3^1	Q99LX0	Park7	VTVAGLAGK	VTVAGLAGK	2	336.329	21.532		y	1	3		957.161
408.253	358.719	y8^2	Q99LX0	Park7	VTVAGLAGK	VTVAGLAGK	2	406.594	21.532		y	2	8		957.161
408.253	445.277	y5^1	Q99LX0	Park7	VTVAGLAGK	VTVAGLAGK	2	1006.67	21.532		y	1	5		957.161
408.253	516.314	y6^1	Q99LX0	Park7	VTVAGLAGK	VTVAGLAGK	2	2831.95	21.532		y	1	6		957.161
408.253	615.382	y7^1	Q99LX0	Park7	VTVAGLAGK	VTVAGLAGK	2	10000	21.532		y	1	7		957.161
408.253	716.43	y8^1	Q99LX0	Park7	VTVAGLAGK	VTVAGLAGK	2	3950.44	21.532		y	1	8		957.161
408.714	118.086	y1^1	Q8R2V2	Iffo2	ATGVNANAV	ATGVNANAV	2	5036.98	14.3555		y	1	1		785.638
408.714	173.092	b2^1	Q8R2V2	Iffo2	ATGVNANAV	ATGVNANAV	2	2728.38	14.3555		b	1	2		785.638
408.714	189.123	y2^1	Q8R2V2	Iffo2	ATGVNANAV	ATGVNANAV	2	2076	14.3555		y	1	2		785.638
408.714	222.116	b5^2	Q8R2V2	Iffo2	ATGVNANAV	ATGVNANAV	2	142.006	14.3555		b	2	5		785.638
408.714	230.114	b3^1	Q8R2V2	Iffo2	ATGVNANAV	ATGVNANAV	2	306.083	14.3555		b	1	3		785.638
408.714	257.635	b6^2	Q8R2V2	Iffo2	ATGVNANAV	ATGVNANAV	2	71.9711	14.3555		b	2	6		785.638
408.714	303.166	y3^1	Q8R2V2	Iffo2	ATGVNANAV	ATGVNANAV	2	920.6	14.3555		y	1	3		785.638
408.714	314.656	b7^2	Q8R2V2	Iffo2	ATGVNANAV	ATGVNANAV	2	606.469	14.3555		b	2	7		785.638
408.714	329.182	b4^1	Q8R2V2	Iffo2	ATGVNANAV	ATGVNANAV	2	2233.81	14.3555		b	1	4		785.638
408.714	350.175	b8^2	Q8R2V2	Iffo2	ATGVNANAV	ATGVNANAV	2	1929.86	14.3555		b	2	8		785.638
408.714	374.203	y4^1	Q8R2V2	Iffo2	ATGVNANAV	ATGVNANAV	2	408.391	14.3555		y	1	4		785.638
408.714	443.225	b5^1	Q8R2V2	Iffo2	ATGVNANAV	ATGVNANAV	2	1946.97	14.3555		b	1	5		785.638
408.714	488.246	y5^1	Q8R2V2	Iffo2	ATGVNANAV	ATGVNANAV	2	1325.16	14.3555		y	1	5		785.638
408.714	514.262	b6^1	Q8R2V2	Iffo2	ATGVNANAV	ATGVNANAV	2	2190.42	14.3555		b	1	6		785.638
408.714	628.305	b7^1	Q8R2V2	Iffo2	ATGVNANAV	ATGVNANAV	2	4477	14.3555		b	1	7		785.638
408.714	644.336	y7^1	Q8R2V2	Iffo2	ATGVNANAV	ATGVNANAV	2	706.619	14.3555		y	1	7		785.638
408.714	699.342	b8^1	Q8R2V2	Iffo2	ATGVNANAV	ATGVNANAV	2	10000	14.3555		b	1	8		785.638
408.714	745.384	y8^1	Q8R2V2	Iffo2	ATGVNANAV	ATGVNANAV	2	61.2091	14.3555		y	1	8		785.638
408.727	118.086	y1^1	A0A338P6K9	Qser1	VAPTASTAV	VAPTASTAV	2	7534.89	17.1064		y	1	1		849.742
408.727	171.113	b2^1	A0A338P6K9	Qser1	VAPTASTAV	VAPTASTAV	2	2106.38	17.1064		b	1	2		849.742
408.727	189.123	y2^1	A0A338P6K9	Qser1	VAPTASTAV	VAPTASTAV	2	2237.84	17.1064		y	1	2		849.742
408.727	290.171	y3^1	A0A338P6K9	Qser1	VAPTASTAV	VAPTASTAV	2	2019.24	17.1064		y	1	3		849.742
408.727	314.669	b7^2	A0A338P6K9	Qser1	VAPTASTAV	VAPTASTAV	2	218.566	17.1064		b	2	7		849.742
408.727	323.674	y7^2	A0A338P6K9	Qser1	VAPTASTAV	VAPTASTAV	2	1559.34	17.1064		y	2	7		849.742
408.727	350.187	b8^2	A0A338P6K9	Qser1	VAPTASTAV	VAPTASTAV	2	890.487	17.1064		b	2	8		849.742
408.727	359.193	y8^2	A0A338P6K9	Qser1	VAPTASTAV	VAPTASTAV	2	225.464	17.1064		y	2	8		849.742
408.727	369.213	b4^1	A0A338P6K9	Qser1	VAPTASTAV	VAPTASTAV	2	391.864	17.1064		b	1	4		849.742
408.727	377.203	y4^1	A0A338P6K9	Qser1	VAPTASTAV	VAPTASTAV	2	948.948	17.1064		y	1	4		849.742
408.727	440.25	b5^1	A0A338P6K9	Qser1	VAPTASTAV	VAPTASTAV	2	2273.25	17.1064		b	1	5		849.742
408.727	448.24	y5^1	A0A338P6K9	Qser1	VAPTASTAV	VAPTASTAV	2	674.635	17.1064		y	1	5		849.742
408.727	527.282	b6^1	A0A338P6K9	Qser1	VAPTASTAV	VAPTASTAV	2	3453.68	17.1064		b	1	6		849.742
408.727	628.33	b7^1	A0A338P6K9	Qser1	VAPTASTAV	VAPTASTAV	2	4132.22	17.1064		b	1	7		849.742
408.727	646.341	y7^1	A0A338P6K9	Qser1	VAPTASTAV	VAPTASTAV	2	4677.09	17.1064		y	1	7		849.742
408.727	699.367	b8^1	A0A338P6K9	Qser1	VAPTASTAV	VAPTASTAV	2	10000	17.1064		b	1	8		849.742
408.727	717.378	y8^1	A0A338P6K9	Qser1	VAPTASTAV	VAPTASTAV	2	182.075	17.1064		y	1	8		849.742
408.732	110.071	y2^2	Q9Z0M5	Lipa	SRVPTGTV	SRVPTGTV	2	76.047	9.17527		y	2	2		655.693
408.732	118.086	y1^1	Q9Z0M5	Lipa	SRVPTGTV	SRVPTGTV	2	997.728	9.17527		y	1	1		655.693
408.732	219.134	y2^1	Q9Z0M5	Lipa	SRVPTGTV	SRVPTGTV	2	1233.96	9.17527		y	1	2		655.693
408.732	244.14	b2^1	Q9Z0M5	Lipa	SRVPTGTV	SRVPTGTV	2	519.094	9.17527		b	1	2		655.693
408.732	343.209	b3^1	Q9Z0M5	Lipa	SRVPTGTV	SRVPTGTV	2	1331.65	9.17527		b	1	3		655.693
408.732	350.193	b7^2	Q9Z0M5	Lipa	SRVPTGTV	SRVPTGTV	2	2204.22	9.17527		b	2	7		655.693
408.732	474.256	y5^1	Q9Z0M5	Lipa	SRVPTGTV	SRVPTGTV	2	499.868	9.17527		y	1	5		655.693
408.732	541.309	b5^1	Q9Z0M5	Lipa	SRVPTGTV	SRVPTGTV	2	1770.76	9.17527		b	1	5		655.693
408.732	573.324	y6^1	Q9Z0M5	Lipa	SRVPTGTV	SRVPTGTV	2	1258.31	9.17527		y	1	6		655.693
408.732	598.331	b6^1	Q9Z0M5	Lipa	SRVPTGTV	SRVPTGTV	2	3043.72	9.17527		b	1	6		655.693
408.732	699.378	b7^1	Q9Z0M5	Lipa	SRVPTGTV	SRVPTGTV	2	10000	9.17527		b	1	7		655.693
408.732	130.05	b1^1	P10853	H2bc15	EIQTAVR	EIQTAVR	2	14.7069	5.66405		b	1	1		575.938
408.732	175.119	y1^1	P10853	H2bc15	EIQTAVR	EIQTAVR	2	1947.5	5.66405		y	1	1		575.938
408.732	223.64	y4^2	P10853	H2bc15	EIQTAVR	EIQTAVR	2	35.2338	5.66405		y	2	4		575.938
408.732	243.134	b2^1	P10853	H2bc15	EIQTAVR	EIQTAVR	2	826.789	5.66405		b	1	2		575.938
408.732	274.187	y2^1	P10853	H2bc15	EIQTAVR	EIQTAVR	2	1726.03	5.66405		y	1	2		575.938
408.732	287.669	y5^2	P10853	H2bc15	EIQTAVR	EIQTAVR	2	1111.76	5.66405		y	2	5		575.938
408.732	344.211	y6^2	P10853	H2bc15	EIQTAVR	EIQTAVR	2	137.118	5.66405		y	2	6		575.938
408.732	345.224	y3^1	P10853	H2bc15	EIQTAVR	EIQTAVR	2	2847.3	5.66405		y	1	3		575.938
408.732	371.193	b3^1	P10853	H2bc15	EIQTAVR	EIQTAVR	2	529.427	5.66405		b	1	3		575.938
408.732	446.272	y4^1	P10853	H2bc15	EIQTAVR	EIQTAVR	2	8688.67	5.66405		y	1	4		575.938
408.732	472.24	b4^1	P10853	H2bc15	EIQTAVR	EIQTAVR	2	132.58	5.66405		b	1	4		575.938
408.732	574.331	y5^1	P10853	H2bc15	EIQTAVR	EIQTAVR	2	10000	5.66405		y	1	5		575.938
408.732	642.346	b6^1	P10853	H2bc15	EIQTAVR	EIQTAVR	2	35.1996	5.66405		b	1	6		575.938
408.732	687.415	y6^1	P10853	H2bc15	EIQTAVR	EIQTAVR	2	223.031	5.66405		y	1	6		575.938
408.745	132.102	y1^1	Q8VI75	Ipo4	VSVSLAQL	VSVSLAQL	2	8751.23	57.8701		y	1	1		1870.55
408.745	187.108	b2^1	Q8VI75	Ipo4	VSVSLAQL	VSVSLAQL	2	2081.63	57.8701		b	1	2		1870.55
408.745	260.16	y2^1	Q8VI75	Ipo4	VSVSLAQL	VSVSLAQL	2	2012.74	57.8701		y	1	2		1870.55
408.745	279.168	b6^2	Q8VI75	Ipo4	VSVSLAQL	VSVSLAQL	2	686.527	57.8701		b	2	6		1870.55
408.745	331.198	y3^1	Q8VI75	Ipo4	VSVSLAQL	VSVSLAQL	2	3784.98	57.8701		y	1	3		1870.55
408.745	343.198	b7^2	Q8VI75	Ipo4	VSVSLAQL	VSVSLAQL	2	1823.09	57.8701		b	2	7		1870.55
408.745	373.208	b4^1	Q8VI75	Ipo4	VSVSLAQL	VSVSLAQL	2	1822.73	57.8701		b	1	4		1870.55
408.745	486.292	b5^1	Q8VI75	Ipo4	VSVSLAQL	VSVSLAQL	2	3601.96	57.8701		b	1	5		1870.55
408.745	531.314	y5^1	Q8VI75	Ipo4	VSVSLAQL	VSVSLAQL	2	1870.8	57.8701		y	1	5		1870.55
408.745	557.329	b6^1	Q8VI75	Ipo4	VSVSLAQL	VSVSLAQL	2	5185.38	57.8701		b	1	6		1870.55
408.745	630.382	y6^1	Q8VI75	Ipo4	VSVSLAQL	VSVSLAQL	2	3871.77	57.8701		y	1	6		1870.55
408.745	685.388	b7^1	Q8VI75	Ipo4	VSVSLAQL	VSVSLAQL	2	10000	57.8701		b	1	7		1870.55
408.745	717.414	y7^1	Q8VI75	Ipo4	VSVSLAQL	VSVSLAQL	2	2635.87	57.8701		y	1	7		1870.55
408.763	118.086	y1^1	P04184	Tk1	SVVKLTAV	SVVKLTAV	2	1535.53	32.9507		y	1	1		1249.72
408.763	187.108	b2^1	P04184	Tk1	SVVKLTAV	SVVKLTAV	2	2288.86	32.9507		b	1	2		1249.72
408.763	189.123	y2^1	P04184	Tk1	SVVKLTAV	SVVKLTAV	2	577.94	32.9507		y	1	2		1249.72
408.763	350.224	b7^2	P04184	Tk1	SVVKLTAV	SVVKLTAV	2	111.837	32.9507		b	2	7		1249.72
408.763	403.255	y4^1	P04184	Tk1	SVVKLTAV	SVVKLTAV	2	1122.65	32.9507		y	1	4		1249.72
408.763	414.271	b4^1	P04184	Tk1	SVVKLTAV	SVVKLTAV	2	419.835	32.9507		b	1	4		1249.72
408.763	531.35	y5^1	P04184	Tk1	SVVKLTAV	SVVKLTAV	2	697.659	32.9507		y	1	5		1249.72
408.763	628.403	b6^1	P04184	Tk1	SVVKLTAV	SVVKLTAV	2	691.048	32.9507		b	1	6		1249.72
408.763	630.418	y6^1	P04184	Tk1	SVVKLTAV	SVVKLTAV	2	10000	32.9507		y	1	6		1249.72
408.763	699.44	b7^1	P04184	Tk1	SVVKLTAV	SVVKLTAV	2	3420.96	32.9507		b	1	7		1249.72
409.202	130.05	b1^1	Q09014	Ncf1	EIYEFHKML	EIYEFHKM(UniMod:35)L	3	54.8307	31.1087		b	1	1		1203.49
409.202	132.102	y1^1	Q09014	Ncf1	EIYEFHKML	EIYEFHKM(UniMod:35)L	3	122.089	31.1087		y	1	1		1203.49
409.202	228.108	b5^3	Q09014	Ncf1	EIYEFHKML	EIYEFHKM(UniMod:35)L	3	72.6163	31.1087		b	3	5		1203.49
409.202	243.134	b2^1	Q09014	Ncf1	EIYEFHKML	EIYEFHKM(UniMod:35)L	3	160.399	31.1087		b	1	2		1203.49
409.202	328.493	y7^3	Q09014	Ncf1	EIYEFHKML	EIYEFHKM(UniMod:35)L	3	1175.42	31.1087		y	3	7		1203.49
409.202	346.183	y5^2	Q09014	Ncf1	EIYEFHKML	EIYEFHKM(UniMod:35)L	3	952.833	31.1087		y	2	5		1203.49
409.202	366.188	y8^3	Q09014	Ncf1	EIYEFHKML	EIYEFHKM(UniMod:35)L	3	305.97	31.1087		y	3	8		1203.49
409.202	407.232	y3^1	Q09014	Ncf1	EIYEFHKML	EIYEFHKM(UniMod:35)L	3	304.614	31.1087		y	1	3		1203.49
409.202	410.705	y6^2	Q09014	Ncf1	EIYEFHKML	EIYEFHKM(UniMod:35)L	3	2087.01	31.1087		y	2	6		1203.49
409.202	474.235	b7^2	Q09014	Ncf1	EIYEFHKML	EIYEFHKM(UniMod:35)L	3	306.806	31.1087		b	2	7		1203.49
409.202	492.236	y7^2	Q09014	Ncf1	EIYEFHKML	EIYEFHKM(UniMod:35)L	3	10000	31.1087		y	2	7		1203.49
409.202	535.24	b4^1	Q09014	Ncf1	EIYEFHKML	EIYEFHKM(UniMod:35)L	3	51.7376	31.1087		b	1	4		1203.49
409.202	544.291	y4^1	Q09014	Ncf1	EIYEFHKML	EIYEFHKM(UniMod:35)L	3	495.642	31.1087		y	1	4		1203.49
409.202	547.752	b8^2	Q09014	Ncf1	EIYEFHKML	EIYEFHKM(UniMod:35)L	3	94.2094	31.1087		b	2	8		1203.49
409.202	548.778	y8^2	Q09014	Ncf1	EIYEFHKML	EIYEFHKM(UniMod:35)L	3	52.3875	31.1087		y	2	8		1203.49
409.202	691.36	y5^1	Q09014	Ncf1	EIYEFHKML	EIYEFHKM(UniMod:35)L	3	676.205	31.1087		y	1	5		1203.49
409.202	820.402	y6^1	Q09014	Ncf1	EIYEFHKML	EIYEFHKM(UniMod:35)L	3	345.886	31.1087		y	1	6		1203.49
409.219	132.102	y1^1	Q80TZ9	Rere	APAAHTHI	APAAHTHI	2	463.369	3.80812		y	1	1		523.79
409.219	169.097	b2^1	Q80TZ9	Rere	APAAHTHI	APAAHTHI	2	1862.12	3.80812		b	1	2		523.79
409.219	240.134	b3^1	Q80TZ9	Rere	APAAHTHI	APAAHTHI	2	835.688	3.80812		b	1	3		523.79
409.219	254.137	y4^2	Q80TZ9	Rere	APAAHTHI	APAAHTHI	2	183.63	3.80812		y	2	4		523.79
409.219	269.161	y2^1	Q80TZ9	Rere	APAAHTHI	APAAHTHI	2	532.574	3.80812		y	1	2		523.79
409.219	289.656	y5^2	Q80TZ9	Rere	APAAHTHI	APAAHTHI	2	31.1883	3.80812		y	2	5		523.79
409.219	311.171	b4^1	Q80TZ9	Rere	APAAHTHI	APAAHTHI	2	475.652	3.80812		b	1	4		523.79
409.219	325.174	y6^2	Q80TZ9	Rere	APAAHTHI	APAAHTHI	2	755.319	3.80812		y	2	6		523.79
409.219	343.672	b7^2	Q80TZ9	Rere	APAAHTHI	APAAHTHI	2	1693.75	3.80812		b	2	7		523.79
409.219	370.208	y3^1	Q80TZ9	Rere	APAAHTHI	APAAHTHI	2	886.516	3.80812		y	1	3		523.79
409.219	373.701	y7^2	Q80TZ9	Rere	APAAHTHI	APAAHTHI	2	10000	3.80812		y	2	7		523.79
409.219	448.23	b5^1	Q80TZ9	Rere	APAAHTHI	APAAHTHI	2	426.772	3.80812		b	1	5		523.79
409.219	507.267	y4^1	Q80TZ9	Rere	APAAHTHI	APAAHTHI	2	1468.15	3.80812		y	1	4		523.79
409.219	549.278	b6^1	Q80TZ9	Rere	APAAHTHI	APAAHTHI	2	595.138	3.80812		b	1	6		523.79
409.219	578.305	y5^1	Q80TZ9	Rere	APAAHTHI	APAAHTHI	2	2008.26	3.80812		y	1	5		523.79
409.219	649.342	y6^1	Q80TZ9	Rere	APAAHTHI	APAAHTHI	2	6791.02	3.80812		y	1	6		523.79
409.219	686.337	b7^1	Q80TZ9	Rere	APAAHTHI	APAAHTHI	2	1364.81	3.80812		b	1	7		523.79
409.219	746.394	y7^1	Q80TZ9	Rere	APAAHTHI	APAAHTHI	2	1673.6	3.80812		y	1	7		523.79
409.224	185.128	b2^1	iRT-pepD		LAGVENSK	LAGVENSK	2	1568.18	-0.172649		b	1	2		418.234
409.224	234.145	y2^1	iRT-pepD		LAGVENSK	LAGVENSK	2	132.824	-0.172649		y	1	2		418.234
409.224	242.15	b3^1	iRT-pepD		LAGVENSK	LAGVENSK	2	255.139	-0.172649		b	1	3		418.234
409.224	348.188	y3^1	iRT-pepD		LAGVENSK	LAGVENSK	2	359.936	-0.172649		y	1	3		418.234
409.224	477.23	y4^1	iRT-pepD		LAGVENSK	LAGVENSK	2	1643.43	-0.172649		y	1	4		418.234
409.224	576.299	y5^1	iRT-pepD		LAGVENSK	LAGVENSK	2	347.3	-0.172649		y	1	5		418.234
409.224	633.32	y6^1	iRT-pepD		LAGVENSK	LAGVENSK	2	10000	-0.172649		y	1	6		418.234
409.224	704.357	y7^1	iRT-pepD		LAGVENSK	LAGVENSK	2	5528.93	-0.172649		y	1	7		418.234
409.232	102.055	b1^1	Q9CZW5	Tomm70	TYVHKGL	TYVHKGL	2	430.886	5.44463		b	1	1		570.453
409.232	265.118	b2^1	Q9CZW5	Tomm70	TYVHKGL	TYVHKGL	2	4074.35	5.44463		b	1	2		570.453
409.232	317.218	y3^1	Q9CZW5	Tomm70	TYVHKGL	TYVHKGL	2	1570	5.44463		y	1	3		570.453
409.232	454.277	y4^1	Q9CZW5	Tomm70	TYVHKGL	TYVHKGL	2	10000	5.44463		y	1	4		570.453
409.232	553.346	y5^1	Q9CZW5	Tomm70	TYVHKGL	TYVHKGL	2	9631.99	5.44463		y	1	5		570.453
409.232	686.362	b6^1	Q9CZW5	Tomm70	TYVHKGL	TYVHKGL	2	521.472	5.44463		b	1	6		570.453
409.232	716.409	y6^1	Q9CZW5	Tomm70	TYVHKGL	TYVHKGL	2	1217.75	5.44463		y	1	6		570.453
409.237	132.102	y1^1	Q99L90	Mcrs1	SVVEIASL	SVVEIASL	2	4726.78	57.3486		y	1	1		1856.65
409.237	187.108	b2^1	Q99L90	Mcrs1	SVVEIASL	SVVEIASL	2	3779.95	57.3486		b	1	2		1856.65
409.237	219.134	y2^1	Q99L90	Mcrs1	SVVEIASL	SVVEIASL	2	10000	57.3486		y	1	2		1856.65
409.237	286.176	b3^1	Q99L90	Mcrs1	SVVEIASL	SVVEIASL	2	1402.04	57.3486		b	1	3		1856.65
409.237	290.171	y3^1	Q99L90	Mcrs1	SVVEIASL	SVVEIASL	2	988.647	57.3486		y	1	3		1856.65
409.237	403.255	y4^1	Q99L90	Mcrs1	SVVEIASL	SVVEIASL	2	3852.47	57.3486		y	1	4		1856.65
409.237	415.219	b4^1	Q99L90	Mcrs1	SVVEIASL	SVVEIASL	2	5484.53	57.3486		b	1	4		1856.65
409.237	528.303	b5^1	Q99L90	Mcrs1	SVVEIASL	SVVEIASL	2	7139.55	57.3486		b	1	5		1856.65
409.237	532.298	y5^1	Q99L90	Mcrs1	SVVEIASL	SVVEIASL	2	850.865	57.3486		y	1	5		1856.65
409.237	599.34	b6^1	Q99L90	Mcrs1	SVVEIASL	SVVEIASL	2	4189.01	57.3486		b	1	6		1856.65
409.237	631.366	y6^1	Q99L90	Mcrs1	SVVEIASL	SVVEIASL	2	2959.08	57.3486		y	1	6		1856.65
409.237	686.372	b7^1	Q99L90	Mcrs1	SVVEIASL	SVVEIASL	2	7118.61	57.3486		b	1	7		1856.65
409.263	132.102	y1^1	Q61168	Laptm5	LPAYLKL	LPAYLKL	2	272.496	53.9064		y	1	1		1769.94
409.263	211.144	b2^1	Q61168	Laptm5	LPAYLKL	LPAYLKL	2	828.67	53.9064		b	1	2		1769.94
409.263	260.197	y2^1	Q61168	Laptm5	LPAYLKL	LPAYLKL	2	1074.95	53.9064		y	1	2		1769.94
409.263	352.721	y6^2	Q61168	Laptm5	LPAYLKL	LPAYLKL	2	7298.76	53.9064		y	2	6		1769.94
409.263	445.245	b4^1	Q61168	Laptm5	LPAYLKL	LPAYLKL	2	1095.18	53.9064		b	1	4		1769.94
409.263	536.344	y4^1	Q61168	Laptm5	LPAYLKL	LPAYLKL	2	281.953	53.9064		y	1	4		1769.94
409.263	607.381	y5^1	Q61168	Laptm5	LPAYLKL	LPAYLKL	2	6403.62	53.9064		y	1	5		1769.94
409.263	704.434	y6^1	Q61168	Laptm5	LPAYLKL	LPAYLKL	2	10000	53.9064		y	1	6		1769.94
409.74	132.102	y1^1	O08579	Emd	VSRSSLGL	VSRSSLGL	2	1593.6	24.3143		y	1	1		1001.28
409.74	187.108	b2^1	O08579	Emd	VSRSSLGL	VSRSSLGL	2	141.869	24.3143		b	1	2		1001.28
409.74	189.123	y2^1	O08579	Emd	VSRSSLGL	VSRSSLGL	2	3172.72	24.3143		y	1	2		1001.28
409.74	302.207	y3^1	O08579	Emd	VSRSSLGL	VSRSSLGL	2	181.308	24.3143		y	1	3		1001.28
409.74	343.209	b3^1	O08579	Emd	VSRSSLGL	VSRSSLGL	2	657.064	24.3143		b	1	3		1001.28
409.74	344.193	b7^2	O08579	Emd	VSRSSLGL	VSRSSLGL	2	396.793	24.3143		b	2	7		1001.28
409.74	430.241	b4^1	O08579	Emd	VSRSSLGL	VSRSSLGL	2	53.9325	24.3143		b	1	4		1001.28
409.74	476.271	y5^1	O08579	Emd	VSRSSLGL	VSRSSLGL	2	87.7053	24.3143		y	1	5		1001.28
409.74	517.273	b5^1	O08579	Emd	VSRSSLGL	VSRSSLGL	2	720.347	24.3143		b	1	5		1001.28
409.74	630.357	b6^1	O08579	Emd	VSRSSLGL	VSRSSLGL	2	10000	24.3143		b	1	6		1001.28
409.74	632.373	y6^1	O08579	Emd	VSRSSLGL	VSRSSLGL	2	786.837	24.3143		y	1	6		1001.28
409.74	687.378	b7^1	O08579	Emd	VSRSSLGL	VSRSSLGL	2	7164.89	24.3143		b	1	7		1001.28
409.74	719.405	y7^1	O08579	Emd	VSRSSLGL	VSRSSLGL	2	2467.08	24.3143		y	1	7		1001.28
409.76	132.102	y1^1	P16715	VACWR129	ALLFKNL	ALLFKNL	2	176.107	52.0819		y	1	1		1725.75
409.76	185.128	b2^1	P16715	VACWR129	ALLFKNL	ALLFKNL	2	3403.75	52.0819		b	1	2		1725.75
409.76	246.145	y2^1	P16715	VACWR129	ALLFKNL	ALLFKNL	2	146.88	52.0819		y	1	2		1725.75
409.76	261.158	y4^2	P16715	VACWR129	ALLFKNL	ALLFKNL	2	161.374	52.0819		y	2	4		1725.75
409.76	298.213	b3^1	P16715	VACWR129	ALLFKNL	ALLFKNL	2	829.345	52.0819		b	1	3		1725.75
409.76	317.7	y5^2	P16715	VACWR129	ALLFKNL	ALLFKNL	2	1194.55	52.0819		y	2	5		1725.75
409.76	344.213	b6^2	P16715	VACWR129	ALLFKNL	ALLFKNL	2	14.067	52.0819		b	2	6		1725.75
409.76	374.24	y3^1	P16715	VACWR129	ALLFKNL	ALLFKNL	2	2055.4	52.0819		y	1	3		1725.75
409.76	445.281	b4^1	P16715	VACWR129	ALLFKNL	ALLFKNL	2	253.898	52.0819		b	1	4		1725.75
409.76	521.308	y4^1	P16715	VACWR129	ALLFKNL	ALLFKNL	2	4599.82	52.0819		y	1	4		1725.75
409.76	573.376	b5^1	P16715	VACWR129	ALLFKNL	ALLFKNL	2	116.398	52.0819		b	1	5		1725.75
409.76	634.392	y5^1	P16715	VACWR129	ALLFKNL	ALLFKNL	2	10000	52.0819		y	1	5		1725.75
409.76	687.419	b6^1	P16715	VACWR129	ALLFKNL	ALLFKNL	2	528.736	52.0819		b	1	6		1725.75
409.76	747.476	y6^1	P16715	VACWR129	ALLFKNL	ALLFKNL	2	463.896	52.0819		y	1	6		1725.75
409.873	132.102	y1^1	Q9D958	Spcs1	TQMDYKGQKL	TQM(UniMod:35)DYKGQKL	3	544.141	4.78328		y	1	1		553.921
409.873	223.142	y4^2	Q9D958	Spcs1	TQMDYKGQKL	TQM(UniMod:35)DYKGQKL	3	112.358	4.78328		y	2	4		553.921
409.873	230.114	b2^1	Q9D958	Spcs1	TQMDYKGQKL	TQM(UniMod:35)DYKGQKL	3	2490.1	4.78328		b	1	2		553.921
409.873	260.197	y2^1	Q9D958	Spcs1	TQMDYKGQKL	TQM(UniMod:35)DYKGQKL	3	585.242	4.78328		y	1	2		553.921
409.873	280.79	b7^3	Q9D958	Spcs1	TQMDYKGQKL	TQM(UniMod:35)DYKGQKL	3	29.657	4.78328		b	3	7		553.921
409.873	287.19	y5^2	Q9D958	Spcs1	TQMDYKGQKL	TQM(UniMod:35)DYKGQKL	3	209.95	4.78328		y	2	5		553.921
409.873	366.175	b9^3	Q9D958	Spcs1	TQMDYKGQKL	TQM(UniMod:35)DYKGQKL	3	84.6687	4.78328		b	3	9		553.921
409.873	368.721	y6^2	Q9D958	Spcs1	TQMDYKGQKL	TQM(UniMod:35)DYKGQKL	3	10000	4.78328		y	2	6		553.921
409.873	376.19	y9^3	Q9D958	Spcs1	TQMDYKGQKL	TQM(UniMod:35)DYKGQKL	3	111.563	4.78328		y	3	9		553.921
409.873	377.149	b3^1	Q9D958	Spcs1	TQMDYKGQKL	TQM(UniMod:35)DYKGQKL	3	249.19	4.78328		b	1	3		553.921
409.873	388.255	y3^1	Q9D958	Spcs1	TQMDYKGQKL	TQM(UniMod:35)DYKGQKL	3	17.4366	4.78328		y	1	3		553.921
409.873	426.235	y7^2	Q9D958	Spcs1	TQMDYKGQKL	TQM(UniMod:35)DYKGQKL	3	283.179	4.78328		y	2	7		553.921
409.873	445.277	y4^1	Q9D958	Spcs1	TQMDYKGQKL	TQM(UniMod:35)DYKGQKL	3	2595.57	4.78328		y	1	4		553.921
409.873	484.711	b8^2	Q9D958	Spcs1	TQMDYKGQKL	TQM(UniMod:35)DYKGQKL	3	19.4825	4.78328		b	2	8		553.921
409.873	492.176	b4^1	Q9D958	Spcs1	TQMDYKGQKL	TQM(UniMod:35)DYKGQKL	3	4633.14	4.78328		b	1	4		553.921
409.873	499.752	y8^2	Q9D958	Spcs1	TQMDYKGQKL	TQM(UniMod:35)DYKGQKL	3	5796.27	4.78328		y	2	8		553.921
409.873	548.758	b9^2	Q9D958	Spcs1	TQMDYKGQKL	TQM(UniMod:35)DYKGQKL	3	507.879	4.78328		b	2	9		553.921
409.873	563.782	y9^2	Q9D958	Spcs1	TQMDYKGQKL	TQM(UniMod:35)DYKGQKL	3	1975.09	4.78328		y	2	9		553.921
409.873	573.372	y5^1	Q9D958	Spcs1	TQMDYKGQKL	TQM(UniMod:35)DYKGQKL	3	784.018	4.78328		y	1	5		553.921
409.873	655.239	b5^1	Q9D958	Spcs1	TQMDYKGQKL	TQM(UniMod:35)DYKGQKL	3	260.496	4.78328		b	1	5		553.921
409.873	736.435	y6^1	Q9D958	Spcs1	TQMDYKGQKL	TQM(UniMod:35)DYKGQKL	3	300.179	4.78328		y	1	6		553.921
409.873	851.462	y7^1	Q9D958	Spcs1	TQMDYKGQKL	TQM(UniMod:35)DYKGQKL	3	154.931	4.78328		y	1	7		553.921
409.873	968.414	b8^1	Q9D958	Spcs1	TQMDYKGQKL	TQM(UniMod:35)DYKGQKL	3	413.07	4.78328		b	1	8		553.921
410.208	106.05	y1^1	Q3UW53	Niban1	KEVDELS	KEVDELS	2	10000	3.83193		y	1	1		524.615
410.208	129.102	b1^1	Q3UW53	Niban1	KEVDELS	KEVDELS	2	1413.45	3.83193		b	1	1		524.615
410.208	219.134	y2^1	Q3UW53	Niban1	KEVDELS	KEVDELS	2	2276.76	3.83193		y	1	2		524.615
410.208	258.145	b2^1	Q3UW53	Niban1	KEVDELS	KEVDELS	2	629.89	3.83193		b	1	2		524.615
410.208	346.161	y6^2	Q3UW53	Niban1	KEVDELS	KEVDELS	2	785.524	3.83193		y	2	6		524.615
410.208	348.177	y3^1	Q3UW53	Niban1	KEVDELS	KEVDELS	2	225.086	3.83193		y	1	3		524.615
410.208	357.213	b3^1	Q3UW53	Niban1	KEVDELS	KEVDELS	2	968.947	3.83193		b	1	3		524.615
410.208	463.203	y4^1	Q3UW53	Niban1	KEVDELS	KEVDELS	2	1817.33	3.83193		y	1	4		524.615
410.208	472.24	b4^1	Q3UW53	Niban1	KEVDELS	KEVDELS	2	786.42	3.83193		b	1	4		524.615
410.208	562.272	y5^1	Q3UW53	Niban1	KEVDELS	KEVDELS	2	1287.17	3.83193		y	1	5		524.615
410.208	601.283	b5^1	Q3UW53	Niban1	KEVDELS	KEVDELS	2	2218.45	3.83193		b	1	5		524.615
410.208	714.367	b6^1	Q3UW53	Niban1	KEVDELS	KEVDELS	2	5460.86	3.83193		b	1	6		524.615
410.223	118.086	y1^1	P16272	LIG	GAKGGIMAV	GAKGGIM(UniMod:35)AV	2	1193.87	7.98954		y	1	1		632.088
410.223	129.066	b2^1	P16272	LIG	GAKGGIMAV	GAKGGIM(UniMod:35)AV	2	480.802	7.98954		b	1	2		632.088
410.223	189.123	y2^1	P16272	LIG	GAKGGIMAV	GAKGGIM(UniMod:35)AV	2	2957.1	7.98954		y	1	2		632.088
410.223	257.161	b3^1	P16272	LIG	GAKGGIMAV	GAKGGIM(UniMod:35)AV	2	493.577	7.98954		b	1	3		632.088
410.223	314.182	b4^1	P16272	LIG	GAKGGIMAV	GAKGGIM(UniMod:35)AV	2	954.73	7.98954		b	1	4		632.088
410.223	316.165	b7^2	P16272	LIG	GAKGGIMAV	GAKGGIM(UniMod:35)AV	2	4788.76	7.98954		b	2	7		632.088
410.223	336.159	y3^1	P16272	LIG	GAKGGIMAV	GAKGGIM(UniMod:35)AV	2	736.753	7.98954		y	1	3		632.088
410.223	351.684	b8^2	P16272	LIG	GAKGGIMAV	GAKGGIM(UniMod:35)AV	2	2645.54	7.98954		b	2	8		632.088
410.223	371.204	b5^1	P16272	LIG	GAKGGIMAV	GAKGGIM(UniMod:35)AV	2	790.69	7.98954		b	1	5		632.088
410.223	484.288	b6^1	P16272	LIG	GAKGGIMAV	GAKGGIM(UniMod:35)AV	2	3650.13	7.98954		b	1	6		632.088
410.223	506.264	y5^1	P16272	LIG	GAKGGIMAV	GAKGGIM(UniMod:35)AV	2	115.424	7.98954		y	1	5		632.088
410.223	563.286	y6^1	P16272	LIG	GAKGGIMAV	GAKGGIM(UniMod:35)AV	2	852.254	7.98954		y	1	6		632.088
410.223	631.323	b7^1	P16272	LIG	GAKGGIMAV	GAKGGIM(UniMod:35)AV	2	10000	7.98954		b	1	7		632.088
410.223	691.381	y7^1	P16272	LIG	GAKGGIMAV	GAKGGIM(UniMod:35)AV	2	2652.72	7.98954		y	1	7		632.088
410.223	702.36	b8^1	P16272	LIG	GAKGGIMAV	GAKGGIM(UniMod:35)AV	2	6944.9	7.98954		b	1	8		632.088
410.234	132.102	y1^1	Q91WQ3	Yars1	SGLLYPGL	SGLLYPGL	2	1669.01	65.2458		y	1	1		2051.82
410.234	145.061	b2^1	Q91WQ3	Yars1	SGLLYPGL	SGLLYPGL	2	1934.68	65.2458		b	1	2		2051.82
410.234	258.145	b3^1	Q91WQ3	Yars1	SGLLYPGL	SGLLYPGL	2	5636.56	65.2458		b	1	3		2051.82
410.234	286.176	y3^1	Q91WQ3	Yars1	SGLLYPGL	SGLLYPGL	2	10000	65.2458		y	1	3		2051.82
410.234	316.176	b6^2	Q91WQ3	Yars1	SGLLYPGL	SGLLYPGL	2	3107.6	65.2458		b	2	6		2051.82
410.234	371.229	b4^1	Q91WQ3	Yars1	SGLLYPGL	SGLLYPGL	2	8616.32	65.2458		b	1	4		2051.82
410.234	449.239	y4^1	Q91WQ3	Yars1	SGLLYPGL	SGLLYPGL	2	7490.21	65.2458		y	1	4		2051.82
410.234	534.292	b5^1	Q91WQ3	Yars1	SGLLYPGL	SGLLYPGL	2	9445.85	65.2458		b	1	5		2051.82
410.234	688.366	b7^1	Q91WQ3	Yars1	SGLLYPGL	SGLLYPGL	2	6405.99	65.2458		b	1	7		2051.82
410.703	118.086	y1^1	Q89121	VPK2	SHFYPAV	SHFYPAV	2	2878.4	29.9017		y	1	1		1168.91
410.703	189.123	y2^1	Q89121	VPK2	SHFYPAV	SHFYPAV	2	225.387	29.9017		y	1	2		1168.91
410.703	225.098	b2^1	Q89121	VPK2	SHFYPAV	SHFYPAV	2	594.916	29.9017		b	1	2		1168.91
410.703	286.176	y3^1	Q89121	VPK2	SHFYPAV	SHFYPAV	2	354.325	29.9017		y	1	3		1168.91
410.703	316.645	b5^2	Q89121	VPK2	SHFYPAV	SHFYPAV	2	993.73	29.9017		b	2	5		1168.91
410.703	352.164	b6^2	Q89121	VPK2	SHFYPAV	SHFYPAV	2	614.606	29.9017		b	2	6		1168.91
410.703	372.167	b3^1	Q89121	VPK2	SHFYPAV	SHFYPAV	2	1319.04	29.9017		b	1	3		1168.91
410.703	535.23	b4^1	Q89121	VPK2	SHFYPAV	SHFYPAV	2	6315.93	29.9017		b	1	4		1168.91
410.703	632.283	b5^1	Q89121	VPK2	SHFYPAV	SHFYPAV	2	407.274	29.9017		b	1	5		1168.91
410.703	703.32	b6^1	Q89121	VPK2	SHFYPAV	SHFYPAV	2	10000	29.9017		b	1	6		1168.91
410.706	132.102	y1^1	Q3U3C9	Gse1	GSPATSSTL	GSPATSSTL	2	10000	12.8429		y	1	1		726.795
410.706	145.061	b2^1	Q3U3C9	Gse1	GSPATSSTL	GSPATSSTL	2	22.9969	12.8429		b	1	2		726.795
410.706	233.15	y2^1	Q3U3C9	Gse1	GSPATSSTL	GSPATSSTL	2	4208.06	12.8429		y	1	2		726.795
410.706	313.151	b4^1	Q3U3C9	Gse1	GSPATSSTL	GSPATSSTL	2	67.5775	12.8429		b	1	4		726.795
410.706	320.182	y3^1	Q3U3C9	Gse1	GSPATSSTL	GSPATSSTL	2	5785.47	12.8429		y	1	3		726.795
410.706	345.159	b8^2	Q3U3C9	Gse1	GSPATSSTL	GSPATSSTL	2	212.843	12.8429		b	2	8		726.795
410.706	407.214	y4^1	Q3U3C9	Gse1	GSPATSSTL	GSPATSSTL	2	282.561	12.8429		y	1	4		726.795
410.706	414.198	b5^1	Q3U3C9	Gse1	GSPATSSTL	GSPATSSTL	2	893.78	12.8429		b	1	5		726.795
410.706	501.23	b6^1	Q3U3C9	Gse1	GSPATSSTL	GSPATSSTL	2	9611.19	12.8429		b	1	6		726.795
410.706	508.261	y5^1	Q3U3C9	Gse1	GSPATSSTL	GSPATSSTL	2	57.3961	12.8429		y	1	5		726.795
410.706	588.262	b7^1	Q3U3C9	Gse1	GSPATSSTL	GSPATSSTL	2	1605.45	12.8429		b	1	7		726.795
410.706	689.31	b8^1	Q3U3C9	Gse1	GSPATSSTL	GSPATSSTL	2	8605.8	12.8429		b	1	8		726.795
410.719	132.102	y1^1	P63085	Mapk1	GPRYTNL	GPRYTNL	2	2231.1	14.9347		y	1	1		801.8
410.719	246.145	y2^1	P63085	Mapk1	GPRYTNL	GPRYTNL	2	302.562	14.9347		y	1	2		801.8
410.719	288.15	b5^2	P63085	Mapk1	GPRYTNL	GPRYTNL	2	86.1471	14.9347		b	2	5		801.8
410.719	311.183	b3^1	P63085	Mapk1	GPRYTNL	GPRYTNL	2	210.382	14.9347		b	1	3		801.8
410.719	345.172	b6^2	P63085	Mapk1	GPRYTNL	GPRYTNL	2	499.72	14.9347		b	2	6		801.8
410.719	382.208	y6^2	P63085	Mapk1	GPRYTNL	GPRYTNL	2	148.825	14.9347		y	2	6		801.8
410.719	474.246	b4^1	P63085	Mapk1	GPRYTNL	GPRYTNL	2	674.159	14.9347		b	1	4		801.8
410.719	510.256	y4^1	P63085	Mapk1	GPRYTNL	GPRYTNL	2	263.666	14.9347		y	1	4		801.8
410.719	575.294	b5^1	P63085	Mapk1	GPRYTNL	GPRYTNL	2	2458.84	14.9347		b	1	5		801.8
410.719	666.357	y5^1	P63085	Mapk1	GPRYTNL	GPRYTNL	2	196.507	14.9347		y	1	5		801.8
410.719	689.337	b6^1	P63085	Mapk1	GPRYTNL	GPRYTNL	2	10000	14.9347		b	1	6		801.8
410.721	235.108	b2^1	Q5SWD9	Tsr1	AYLFAHV	AYLFAHV	2	3006.69	45.9147		b	1	2		1572.57
410.721	237.129	y4^2	Q5SWD9	Tsr1	AYLFAHV	AYLFAHV	2	193.66	45.9147		y	2	4		1572.57
410.721	255.145	y2^1	Q5SWD9	Tsr1	AYLFAHV	AYLFAHV	2	1421.61	45.9147		y	1	2		1572.57
410.721	293.671	y5^2	Q5SWD9	Tsr1	AYLFAHV	AYLFAHV	2	82.8902	45.9147		y	2	5		1572.57
410.721	326.182	y3^1	Q5SWD9	Tsr1	AYLFAHV	AYLFAHV	2	917.257	45.9147		y	1	3		1572.57
410.721	348.192	b3^1	Q5SWD9	Tsr1	AYLFAHV	AYLFAHV	2	917.009	45.9147		b	1	3		1572.57
410.721	352.182	b6^2	Q5SWD9	Tsr1	AYLFAHV	AYLFAHV	2	226.933	45.9147		b	2	6		1572.57
410.721	375.203	y6^2	Q5SWD9	Tsr1	AYLFAHV	AYLFAHV	2	342.912	45.9147		y	2	6		1572.57
410.721	473.251	y4^1	Q5SWD9	Tsr1	AYLFAHV	AYLFAHV	2	4044.83	45.9147		y	1	4		1572.57
410.721	586.335	y5^1	Q5SWD9	Tsr1	AYLFAHV	AYLFAHV	2	10000	45.9147		y	1	5		1572.57
410.721	749.398	y6^1	Q5SWD9	Tsr1	AYLFAHV	AYLFAHV	2	1128.15	45.9147		y	1	6		1572.57
410.732	199.144	b2^1	P61358	Rpl27	VVNKDVF	VVNKDVF	2	1891.27	19.7078		b	1	2		924.441
410.732	361.198	y6^2	P61358	Rpl27	VVNKDVF	VVNKDVF	2	227.01	19.7078		y	2	6		924.441
410.732	508.277	y4^1	P61358	Rpl27	VVNKDVF	VVNKDVF	2	592.439	19.7078		y	1	4		924.441
410.732	556.309	b5^1	P61358	Rpl27	VVNKDVF	VVNKDVF	2	670.51	19.7078		b	1	5		924.441
410.732	622.32	y5^1	P61358	Rpl27	VVNKDVF	VVNKDVF	2	10000	19.7078		y	1	5		924.441
410.732	655.377	b6^1	P61358	Rpl27	VVNKDVF	VVNKDVF	2	1932.57	19.7078		b	1	6		924.441
410.732	721.388	y6^1	P61358	Rpl27	VVNKDVF	VVNKDVF	2	1963.38	19.7078		y	1	6		924.441
410.737	132.102	y1^1	Q01219	VACWR177	ISRFANL	ISRFANL	2	1315.79	31.1895		y	1	1		1205.74
410.737	201.123	b2^1	Q01219	VACWR177	ISRFANL	ISRFANL	2	148.331	31.1895		b	1	2		1205.74
410.737	246.145	y2^1	Q01219	VACWR177	ISRFANL	ISRFANL	2	1134.57	31.1895		y	1	2		1205.74
410.737	345.19	b6^2	Q01219	VACWR177	ISRFANL	ISRFANL	2	631.563	31.1895		b	2	6		1205.74
410.737	357.224	b3^1	Q01219	VACWR177	ISRFANL	ISRFANL	2	316.605	31.1895		b	1	3		1205.74
410.737	504.293	b4^1	Q01219	VACWR177	ISRFANL	ISRFANL	2	445.905	31.1895		b	1	4		1205.74
410.737	575.33	b5^1	Q01219	VACWR177	ISRFANL	ISRFANL	2	3267.28	31.1895		b	1	5		1205.74
410.737	620.351	y5^1	Q01219	VACWR177	ISRFANL	ISRFANL	2	1031.86	31.1895		y	1	5		1205.74
410.737	689.373	b6^1	Q01219	VACWR177	ISRFANL	ISRFANL	2	10000	31.1895		b	1	6		1205.74
410.737	707.384	y6^1	Q01219	VACWR177	ISRFANL	ISRFANL	2	7019.79	31.1895		y	1	6		1205.74
410.737	133.061	y1^1	P60060	Sec61g	IHIPINN	IHIPINN	2	7127.35	30.6582		y	1	1		1190.6
410.737	229.124	y4^2	P60060	Sec61g	IHIPINN	IHIPINN	2	254.08	30.6582		y	2	4		1190.6
410.737	247.104	y2^1	P60060	Sec61g	IHIPINN	IHIPINN	2	3258.05	30.6582		y	1	2		1190.6
410.737	251.15	b2^1	P60060	Sec61g	IHIPINN	IHIPINN	2	4075.28	30.6582		b	1	2		1190.6
410.737	344.711	b6^2	P60060	Sec61g	IHIPINN	IHIPINN	2	714.953	30.6582		b	2	6		1190.6
410.737	360.188	y3^1	P60060	Sec61g	IHIPINN	IHIPINN	2	149.913	30.6582		y	1	3		1190.6
410.737	364.234	b3^1	P60060	Sec61g	IHIPINN	IHIPINN	2	9176.32	30.6582		b	1	3		1190.6
410.737	457.241	y4^1	P60060	Sec61g	IHIPINN	IHIPINN	2	1166.08	30.6582		y	1	4		1190.6
410.737	461.287	b4^1	P60060	Sec61g	IHIPINN	IHIPINN	2	1026.44	30.6582		b	1	4		1190.6
410.737	570.325	y5^1	P60060	Sec61g	IHIPINN	IHIPINN	2	282.768	30.6582		y	1	5		1190.6
410.737	574.371	b5^1	P60060	Sec61g	IHIPINN	IHIPINN	2	7224.39	30.6582		b	1	5		1190.6
410.737	688.414	b6^1	P60060	Sec61g	IHIPINN	IHIPINN	2	10000	30.6582		b	1	6		1190.6
410.737	171.113	b2^1	P27659	Rpl3	VAFSVARA	VAFSVARA	2	2642.33	26.1848		b	1	2		1049.41
410.737	246.156	y2^1	P27659	Rpl3	VAFSVARA	VAFSVARA	2	91.5	26.1848		y	1	2		1049.41
410.737	317.193	y3^1	P27659	Rpl3	VAFSVARA	VAFSVARA	2	1046.22	26.1848		y	1	3		1049.41
410.737	318.181	b3^1	P27659	Rpl3	VAFSVARA	VAFSVARA	2	461.51	26.1848		b	1	3		1049.41
410.737	325.685	y6^2	P27659	Rpl3	VAFSVARA	VAFSVARA	2	1329.96	26.1848		y	2	6		1049.41
410.737	405.213	b4^1	P27659	Rpl3	VAFSVARA	VAFSVARA	2	136.607	26.1848		b	1	4		1049.41
410.737	416.262	y4^1	P27659	Rpl3	VAFSVARA	VAFSVARA	2	1287.23	26.1848		y	1	4		1049.41
410.737	503.294	y5^1	P27659	Rpl3	VAFSVARA	VAFSVARA	2	4928.97	26.1848		y	1	5		1049.41
410.737	504.282	b5^1	P27659	Rpl3	VAFSVARA	VAFSVARA	2	995.331	26.1848		b	1	5		1049.41
410.737	575.319	b6^1	P27659	Rpl3	VAFSVARA	VAFSVARA	2	48.3236	26.1848		b	1	6		1049.41
410.737	650.362	y6^1	P27659	Rpl3	VAFSVARA	VAFSVARA	2	10000	26.1848		y	1	6		1049.41
410.737	721.399	y7^1	P27659	Rpl3	VAFSVARA	VAFSVARA	2	3209.73	26.1848		y	1	7		1049.41
410.756	132.102	y1^1	Q99K85	Psat1	NIVHPKL	NIVHPKL	2	310.336	29.401		y	1	1		1150.61
410.756	228.134	b2^1	Q99K85	Psat1	NIVHPKL	NIVHPKL	2	3096.5	29.401		b	1	2		1150.61
410.756	247.658	y4^2	Q99K85	Psat1	NIVHPKL	NIVHPKL	2	31.4757	29.401		y	2	4		1150.61
410.756	260.197	y2^1	Q99K85	Psat1	NIVHPKL	NIVHPKL	2	52.4269	29.401		y	1	2		1150.61
410.756	297.192	y5^2	Q99K85	Psat1	NIVHPKL	NIVHPKL	2	103.44	29.401		y	2	5		1150.61
410.756	327.203	b3^1	Q99K85	Psat1	NIVHPKL	NIVHPKL	2	452.242	29.401		b	1	3		1150.61
410.756	353.734	y6^2	Q99K85	Psat1	NIVHPKL	NIVHPKL	2	310.344	29.401		y	2	6		1150.61
410.756	357.25	y3^1	Q99K85	Psat1	NIVHPKL	NIVHPKL	2	4073.38	29.401		y	1	3		1150.61
410.756	464.262	b4^1	Q99K85	Psat1	NIVHPKL	NIVHPKL	2	759.555	29.401		b	1	4		1150.61
410.756	494.309	y4^1	Q99K85	Psat1	NIVHPKL	NIVHPKL	2	1656.44	29.401		y	1	4		1150.61
410.756	593.377	y5^1	Q99K85	Psat1	NIVHPKL	NIVHPKL	2	10000	29.401		y	1	5		1150.61
410.756	689.409	b6^1	Q99K85	Psat1	NIVHPKL	NIVHPKL	2	131.29	29.401		b	1	6		1150.61
410.756	706.461	y6^1	Q99K85	Psat1	NIVHPKL	NIVHPKL	2	863.865	29.401		y	1	6		1150.61
410.756	211.144	b2^1	Q80XQ2	Tbc1d5	PLNIHKV	PLNIHKV	2	2274.56	17.7228		b	1	2		868.349
410.756	246.181	y2^1	Q80XQ2	Tbc1d5	PLNIHKV	PLNIHKV	2	2462.83	17.7228		y	1	2		868.349
410.756	325.187	b3^1	Q80XQ2	Tbc1d5	PLNIHKV	PLNIHKV	2	1731.7	17.7228		b	1	3		868.349
410.756	352.216	b6^2	Q80XQ2	Tbc1d5	PLNIHKV	PLNIHKV	2	4681.62	17.7228		b	2	6		868.349
410.756	383.24	y3^1	Q80XQ2	Tbc1d5	PLNIHKV	PLNIHKV	2	2305.49	17.7228		y	1	3		868.349
410.756	438.271	b4^1	Q80XQ2	Tbc1d5	PLNIHKV	PLNIHKV	2	1003.3	17.7228		b	1	4		868.349
410.756	496.324	y4^1	Q80XQ2	Tbc1d5	PLNIHKV	PLNIHKV	2	697.05	17.7228		y	1	4		868.349
410.756	575.33	b5^1	Q80XQ2	Tbc1d5	PLNIHKV	PLNIHKV	2	3192.14	17.7228		b	1	5		868.349
410.756	610.367	y5^1	Q80XQ2	Tbc1d5	PLNIHKV	PLNIHKV	2	9651.77	17.7228		y	1	5		868.349
410.756	703.425	b6^1	Q80XQ2	Tbc1d5	PLNIHKV	PLNIHKV	2	669.576	17.7228		b	1	6		868.349
410.756	723.451	y6^1	Q80XQ2	Tbc1d5	PLNIHKV	PLNIHKV	2	7086.51	17.7228		y	1	6		868.349
411.206	132.102	y1^1	Q80XK6	Atg2b	SSPAYPSL	SSPAYPSL	2	2393.88	38.9808		y	1	1		1400.28
411.206	175.071	b2^1	Q80XK6	Atg2b	SSPAYPSL	SSPAYPSL	2	2807.73	38.9808		b	1	2		1400.28
411.206	219.134	y2^1	Q80XK6	Atg2b	SSPAYPSL	SSPAYPSL	2	721.461	38.9808		y	1	2		1400.28
411.206	272.124	b3^1	Q80XK6	Atg2b	SSPAYPSL	SSPAYPSL	2	97.9548	38.9808		b	1	3		1400.28
411.206	316.187	y3^1	Q80XK6	Atg2b	SSPAYPSL	SSPAYPSL	2	9825.68	38.9808		y	1	3		1400.28
411.206	324.174	y6^2	Q80XK6	Atg2b	SSPAYPSL	SSPAYPSL	2	486.153	38.9808		y	2	6		1400.28
411.206	343.161	b4^1	Q80XK6	Atg2b	SSPAYPSL	SSPAYPSL	2	1656.22	38.9808		b	1	4		1400.28
411.206	479.25	y4^1	Q80XK6	Atg2b	SSPAYPSL	SSPAYPSL	2	1422.58	38.9808		y	1	4		1400.28
411.206	506.225	b5^1	Q80XK6	Atg2b	SSPAYPSL	SSPAYPSL	2	10000	38.9808		b	1	5		1400.28
411.206	603.277	b6^1	Q80XK6	Atg2b	SSPAYPSL	SSPAYPSL	2	877.85	38.9808		b	1	6		1400.28
411.206	647.34	y6^1	Q80XK6	Atg2b	SSPAYPSL	SSPAYPSL	2	5202.34	38.9808		y	1	6		1400.28
411.206	690.309	b7^1	Q80XK6	Atg2b	SSPAYPSL	SSPAYPSL	2	2752.34	38.9808		b	1	7		1400.28
411.21	129.066	b2^1	iRT-pepB		AGSSEPVTGLDAK	AGSSEPVTGLDAK	3	262.528	16.9874		b	1	2		847.25
411.21	147.113	y1^1	iRT-pepB		AGSSEPVTGLDAK	AGSSEPVTGLDAK	3	378.159	16.9874		y	1	1		847.25
411.21	218.15	y2^1	iRT-pepB		AGSSEPVTGLDAK	AGSSEPVTGLDAK	3	991.432	16.9874		y	1	2		847.25
411.21	314.65	b7^2	iRT-pepB		AGSSEPVTGLDAK	AGSSEPVTGLDAK	3	936.931	16.9874		b	2	7		847.25
411.21	400.729	y8^2	iRT-pepB		AGSSEPVTGLDAK	AGSSEPVTGLDAK	3	770.99	16.9874		y	2	8		847.25
411.21	432.173	b5^1	iRT-pepB		AGSSEPVTGLDAK	AGSSEPVTGLDAK	3	549.027	16.9874		b	1	5		847.25
411.21	446.261	y4^1	iRT-pepB		AGSSEPVTGLDAK	AGSSEPVTGLDAK	3	1069.31	16.9874		y	1	4		847.25
411.21	503.282	y5^1	iRT-pepB		AGSSEPVTGLDAK	AGSSEPVTGLDAK	3	2600.29	16.9874		y	1	5		847.25
411.21	529.225	b6^1	iRT-pepB		AGSSEPVTGLDAK	AGSSEPVTGLDAK	3	1561.08	16.9874		b	1	6		847.25
411.21	604.33	y6^1	iRT-pepB		AGSSEPVTGLDAK	AGSSEPVTGLDAK	3	10000	16.9874		y	1	6		847.25
411.21	628.294	b7^1	iRT-pepB		AGSSEPVTGLDAK	AGSSEPVTGLDAK	3	330.995	16.9874		b	1	7		847.25
411.21	703.398	y7^1	iRT-pepB		AGSSEPVTGLDAK	AGSSEPVTGLDAK	3	700.427	16.9874		y	1	7		847.25
411.21	800.451	y8^1	iRT-pepB		AGSSEPVTGLDAK	AGSSEPVTGLDAK	3	1650.05	16.9874		y	1	8		847.25
411.224	118.086	y1^1	Q8CIA9	Mfsd14b	SSITFPAV	SSITFPAV	2	10000	58.7685		y	1	1		1891.33
411.224	175.071	b2^1	Q8CIA9	Mfsd14b	SSITFPAV	SSITFPAV	2	997.914	58.7685		b	1	2		1891.33
411.224	189.123	y2^1	Q8CIA9	Mfsd14b	SSITFPAV	SSITFPAV	2	2532.67	58.7685		y	1	2		1891.33
411.224	286.176	y3^1	Q8CIA9	Mfsd14b	SSITFPAV	SSITFPAV	2	9425.53	58.7685		y	1	3		1891.33
411.224	317.166	b6^2	Q8CIA9	Mfsd14b	SSITFPAV	SSITFPAV	2	3790.06	58.7685		b	2	6		1891.33
411.224	352.684	b7^2	Q8CIA9	Mfsd14b	SSITFPAV	SSITFPAV	2	450.169	58.7685		b	2	7		1891.33
411.224	433.245	y4^1	Q8CIA9	Mfsd14b	SSITFPAV	SSITFPAV	2	1314.28	58.7685		y	1	4		1891.33
411.224	534.292	y5^1	Q8CIA9	Mfsd14b	SSITFPAV	SSITFPAV	2	175.682	58.7685		y	1	5		1891.33
411.224	536.271	b5^1	Q8CIA9	Mfsd14b	SSITFPAV	SSITFPAV	2	9287.84	58.7685		b	1	5		1891.33
411.224	633.324	b6^1	Q8CIA9	Mfsd14b	SSITFPAV	SSITFPAV	2	3487.05	58.7685		b	1	6		1891.33
411.224	647.376	y6^1	Q8CIA9	Mfsd14b	SSITFPAV	SSITFPAV	2	1666.07	58.7685		y	1	6		1891.33
411.224	704.361	b7^1	Q8CIA9	Mfsd14b	SSITFPAV	SSITFPAV	2	7680.64	58.7685		b	1	7		1891.33
411.229	102.055	y2^2	Q8BTM8	Flna	VTVRYSP	VTVRYSP	2	200.863	11.5843		y	2	2		696.692
411.229	116.071	y1^1	Q8BTM8	Flna	VTVRYSP	VTVRYSP	2	804.797	11.5843		y	1	1		696.692
411.229	201.123	b2^1	Q8BTM8	Flna	VTVRYSP	VTVRYSP	2	247.794	11.5843		b	1	2		696.692
411.229	203.103	y2^1	Q8BTM8	Flna	VTVRYSP	VTVRYSP	2	851.396	11.5843		y	1	2		696.692
411.229	300.192	b3^1	Q8BTM8	Flna	VTVRYSP	VTVRYSP	2	61.589	11.5843		b	1	3		696.692
411.229	361.695	y6^2	Q8BTM8	Flna	VTVRYSP	VTVRYSP	2	878.866	11.5843		y	2	6		696.692
411.229	366.166	y3^1	Q8BTM8	Flna	VTVRYSP	VTVRYSP	2	238.075	11.5843		y	1	3		696.692
411.229	456.293	b4^1	Q8BTM8	Flna	VTVRYSP	VTVRYSP	2	644.098	11.5843		b	1	4		696.692
411.229	522.267	y4^1	Q8BTM8	Flna	VTVRYSP	VTVRYSP	2	837.7	11.5843		y	1	4		696.692
411.229	619.356	b5^1	Q8BTM8	Flna	VTVRYSP	VTVRYSP	2	2418.39	11.5843		b	1	5		696.692
411.229	722.383	y6^1	Q8BTM8	Flna	VTVRYSP	VTVRYSP	2	10000	11.5843		y	1	6		696.692
411.242	132.102	y1^1	P99027	Rplp2	ASYLLAAL	ASYLLAAL	2	9374.42	73.8037		y	1	1		2264.41
411.242	159.076	b2^1	P99027	Rplp2	ASYLLAAL	ASYLLAAL	2	795.063	73.8037		b	1	2		2264.41
411.242	203.139	y2^1	P99027	Rplp2	ASYLLAAL	ASYLLAAL	2	6118.2	73.8037		y	1	2		2264.41
411.242	274.176	y3^1	P99027	Rplp2	ASYLLAAL	ASYLLAAL	2	2783.57	73.8037		y	1	3		2264.41
411.242	274.658	b5^2	P99027	Rplp2	ASYLLAAL	ASYLLAAL	2	27.0888	73.8037		b	2	5		2264.41
411.242	310.176	b6^2	P99027	Rplp2	ASYLLAAL	ASYLLAAL	2	211.647	73.8037		b	2	6		2264.41
411.242	322.14	b3^1	P99027	Rplp2	ASYLLAAL	ASYLLAAL	2	1995.63	73.8037		b	1	3		2264.41
411.242	332.207	y6^2	P99027	Rplp2	ASYLLAAL	ASYLLAAL	2	16.8091	73.8037		y	2	6		2264.41
411.242	345.695	b7^2	P99027	Rplp2	ASYLLAAL	ASYLLAAL	2	683.316	73.8037		b	2	7		2264.41
411.242	375.723	y7^2	P99027	Rplp2	ASYLLAAL	ASYLLAAL	2	10.163	73.8037		y	2	7		2264.41
411.242	387.26	y4^1	P99027	Rplp2	ASYLLAAL	ASYLLAAL	2	2251.58	73.8037		y	1	4		2264.41
411.242	435.224	b4^1	P99027	Rplp2	ASYLLAAL	ASYLLAAL	2	3816.8	73.8037		b	1	4		2264.41
411.242	500.344	y5^1	P99027	Rplp2	ASYLLAAL	ASYLLAAL	2	336.832	73.8037		y	1	5		2264.41
411.242	548.308	b5^1	P99027	Rplp2	ASYLLAAL	ASYLLAAL	2	7211.29	73.8037		b	1	5		2264.41
411.242	619.345	b6^1	P99027	Rplp2	ASYLLAAL	ASYLLAAL	2	9972.39	73.8037		b	1	6		2264.41
411.242	663.408	y6^1	P99027	Rplp2	ASYLLAAL	ASYLLAAL	2	980.723	73.8037		y	1	6		2264.41
411.242	690.382	b7^1	P99027	Rplp2	ASYLLAAL	ASYLLAAL	2	9177.13	73.8037		b	1	7		2264.41
411.242	750.44	y7^1	P99027	Rplp2	ASYLLAAL	ASYLLAAL	2	96.7945	73.8037		y	1	7		2264.41
411.242	132.102	y1^1	Q6ZQ89	Marchf6	SVIVFGSI	SVIVFGSI	2	5545.23	70.4236		y	1	1		2177.72
411.242	187.108	b2^1	Q6ZQ89	Marchf6	SVIVFGSI	SVIVFGSI	2	2598.98	70.4236		b	1	2		2177.72
411.242	219.134	y2^1	Q6ZQ89	Marchf6	SVIVFGSI	SVIVFGSI	2	7699.69	70.4236		y	1	2		2177.72
411.242	276.155	y3^1	Q6ZQ89	Marchf6	SVIVFGSI	SVIVFGSI	2	3384.86	70.4236		y	1	3		2177.72
411.242	300.192	b3^1	Q6ZQ89	Marchf6	SVIVFGSI	SVIVFGSI	2	4232.68	70.4236		b	1	3		2177.72
411.242	399.26	b4^1	Q6ZQ89	Marchf6	SVIVFGSI	SVIVFGSI	2	9063.84	70.4236		b	1	4		2177.72
411.242	423.224	y4^1	Q6ZQ89	Marchf6	SVIVFGSI	SVIVFGSI	2	3053.52	70.4236		y	1	4		2177.72
411.242	522.292	y5^1	Q6ZQ89	Marchf6	SVIVFGSI	SVIVFGSI	2	2900.08	70.4236		y	1	5		2177.72
411.242	603.35	b6^1	Q6ZQ89	Marchf6	SVIVFGSI	SVIVFGSI	2	4565.52	70.4236		b	1	6		2177.72
411.242	635.376	y6^1	Q6ZQ89	Marchf6	SVIVFGSI	SVIVFGSI	2	8841.52	70.4236		y	1	6		2177.72
411.242	690.382	b7^1	Q6ZQ89	Marchf6	SVIVFGSI	SVIVFGSI	2	8090.2	70.4236		b	1	7		2177.72
411.248	281.15	y2^1	Q8R526	Pkd1l1	PLVTLKDIAVY	PLVTLKDIAVY	3	75.9441	101.704		y	1	2		2906.83
411.248	411.242	y7^2	Q8R526	Pkd1l1	PLVTLKDIAVY	PLVTLKDIAVY	3	10000	101.704		y	2	7		2906.83
411.721	132.102	y1^1	Q68FD5	Cltc	ANIGFSTL	ANIGFSTL	2	4646.26	55.3227		y	1	1		1803.85
411.721	186.087	b2^1	Q68FD5	Cltc	ANIGFSTL	ANIGFSTL	2	3813.68	55.3227		b	1	2		1803.85
411.721	233.15	y2^1	Q68FD5	Cltc	ANIGFSTL	ANIGFSTL	2	2005.41	55.3227		y	1	2		1803.85
411.721	299.171	b3^1	Q68FD5	Cltc	ANIGFSTL	ANIGFSTL	2	1544.77	55.3227		b	1	3		1803.85
411.721	319.181	y6^2	Q68FD5	Cltc	ANIGFSTL	ANIGFSTL	2	131.373	55.3227		y	2	6		1803.85
411.721	320.182	y3^1	Q68FD5	Cltc	ANIGFSTL	ANIGFSTL	2	5824.41	55.3227		y	1	3		1803.85
411.721	356.193	b4^1	Q68FD5	Cltc	ANIGFSTL	ANIGFSTL	2	1563.48	55.3227		b	1	4		1803.85
411.721	467.25	y4^1	Q68FD5	Cltc	ANIGFSTL	ANIGFSTL	2	605.623	55.3227		y	1	4		1803.85
411.721	503.261	b5^1	Q68FD5	Cltc	ANIGFSTL	ANIGFSTL	2	10000	55.3227		b	1	5		1803.85
411.721	524.271	y5^1	Q68FD5	Cltc	ANIGFSTL	ANIGFSTL	2	1290.48	55.3227		y	1	5		1803.85
411.721	590.293	b6^1	Q68FD5	Cltc	ANIGFSTL	ANIGFSTL	2	1156.75	55.3227		b	1	6		1803.85
411.721	637.356	y6^1	Q68FD5	Cltc	ANIGFSTL	ANIGFSTL	2	911.762	55.3227		y	1	6		1803.85
411.721	691.341	b7^1	Q68FD5	Cltc	ANIGFSTL	ANIGFSTL	2	3197.53	55.3227		b	1	7		1803.85
411.74	132.102	y1^1	O70472	Tmem131	TGAVFSKL	TGAVFSKL	2	339.672	34.1096		y	1	1		1279.93
411.74	159.076	b2^1	O70472	Tmem131	TGAVFSKL	TGAVFSKL	2	3936.51	34.1096		b	1	2		1279.93
411.74	230.114	b3^1	O70472	Tmem131	TGAVFSKL	TGAVFSKL	2	5893.6	34.1096		b	1	3		1279.93
411.74	260.197	y2^1	O70472	Tmem131	TGAVFSKL	TGAVFSKL	2	1069.7	34.1096		y	1	2		1279.93
411.74	329.182	b4^1	O70472	Tmem131	TGAVFSKL	TGAVFSKL	2	3164.87	34.1096		b	1	4		1279.93
411.74	346.192	b7^2	O70472	Tmem131	TGAVFSKL	TGAVFSKL	2	469.408	34.1096		b	2	7		1279.93
411.74	347.229	y3^1	O70472	Tmem131	TGAVFSKL	TGAVFSKL	2	1853.56	34.1096		y	1	3		1279.93
411.74	476.25	b5^1	O70472	Tmem131	TGAVFSKL	TGAVFSKL	2	62.9215	34.1096		b	1	5		1279.93
411.74	494.297	y4^1	O70472	Tmem131	TGAVFSKL	TGAVFSKL	2	10000	34.1096		y	1	4		1279.93
411.74	563.282	b6^1	O70472	Tmem131	TGAVFSKL	TGAVFSKL	2	547.428	34.1096		b	1	6		1279.93
411.74	593.366	y5^1	O70472	Tmem131	TGAVFSKL	TGAVFSKL	2	5864.47	34.1096		y	1	5		1279.93
411.74	664.403	y6^1	O70472	Tmem131	TGAVFSKL	TGAVFSKL	2	4960.75	34.1096		y	1	6		1279.93
411.74	691.377	b7^1	O70472	Tmem131	TGAVFSKL	TGAVFSKL	2	1971.11	34.1096		b	1	7		1279.93
411.74	721.424	y7^1	O70472	Tmem131	TGAVFSKL	TGAVFSKL	2	4995	34.1096		y	1	7		1279.93
411.74	132.102	y1^1	P62900	Rpl31	VTTFKNL	VTTFKNL	2	151.493	28.3462		y	1	1		1110.13
411.74	201.123	b2^1	P62900	Rpl31	VTTFKNL	VTTFKNL	2	1737.32	28.3462		b	1	2		1110.13
411.74	362.205	y6^2	P62900	Rpl31	VTTFKNL	VTTFKNL	2	265.607	28.3462		y	2	6		1110.13
411.74	374.24	y3^1	P62900	Rpl31	VTTFKNL	VTTFKNL	2	1409.92	28.3462		y	1	3		1110.13
411.74	521.308	y4^1	P62900	Rpl31	VTTFKNL	VTTFKNL	2	637.293	28.3462		y	1	4		1110.13
411.74	622.356	y5^1	P62900	Rpl31	VTTFKNL	VTTFKNL	2	10000	28.3462		y	1	5		1110.13
411.74	723.404	y6^1	P62900	Rpl31	VTTFKNL	VTTFKNL	2	8654.24	28.3462		y	1	6		1110.13
411.876	129.102	b1^1	Q60605	Myl6	KVLGNPKSDEM	KVLGNPKSDEM(UniMod:35)	3	2060.57	-2.42835		b	1	1		384.044
411.876	166.053	y1^1	Q60605	Myl6	KVLGNPKSDEM	KVLGNPKSDEM(UniMod:35)	3	3874.55	-2.42835		y	1	1		384.044
411.876	228.171	b2^1	Q60605	Myl6	KVLGNPKSDEM	KVLGNPKSDEM(UniMod:35)	3	335.491	-2.42835		b	1	2		384.044
411.876	256.663	b5^2	Q60605	Myl6	KVLGNPKSDEM	KVLGNPKSDEM(UniMod:35)	3	85.5352	-2.42835		b	2	5		384.044
411.876	295.096	y2^1	Q60605	Myl6	KVLGNPKSDEM	KVLGNPKSDEM(UniMod:35)	3	419.575	-2.42835		y	1	2		384.044
411.876	305.19	b6^2	Q60605	Myl6	KVLGNPKSDEM	KVLGNPKSDEM(UniMod:35)	3	35.1771	-2.42835		b	2	6		384.044
411.876	313.847	b9^3	Q60605	Myl6	KVLGNPKSDEM	KVLGNPKSDEM(UniMod:35)	3	492.857	-2.42835		b	3	9		384.044
411.876	341.255	b3^1	Q60605	Myl6	KVLGNPKSDEM	KVLGNPKSDEM(UniMod:35)	3	733.007	-2.42835		b	1	3		384.044
411.876	356.861	b10^3	Q60605	Myl6	KVLGNPKSDEM	KVLGNPKSDEM(UniMod:35)	3	84.6789	-2.42835		b	3	10		384.044
411.876	361.655	y6^2	Q60605	Myl6	KVLGNPKSDEM	KVLGNPKSDEM(UniMod:35)	3	637.014	-2.42835		y	2	6		384.044
411.876	369.237	b7^2	Q60605	Myl6	KVLGNPKSDEM	KVLGNPKSDEM(UniMod:35)	3	290.33	-2.42835		b	2	7		384.044
411.876	398.276	b4^1	Q60605	Myl6	KVLGNPKSDEM	KVLGNPKSDEM(UniMod:35)	3	885.58	-2.42835		b	1	4		384.044
411.876	410.123	y3^1	Q60605	Myl6	KVLGNPKSDEM	KVLGNPKSDEM(UniMod:35)	3	81.5571	-2.42835		y	1	3		384.044
411.876	412.753	b8^2	Q60605	Myl6	KVLGNPKSDEM	KVLGNPKSDEM(UniMod:35)	3	93.1113	-2.42835		b	2	8		384.044
411.876	418.676	y7^2	Q60605	Myl6	KVLGNPKSDEM	KVLGNPKSDEM(UniMod:35)	3	61.8019	-2.42835		y	2	7		384.044
411.876	470.267	b9^2	Q60605	Myl6	KVLGNPKSDEM	KVLGNPKSDEM(UniMod:35)	3	4671.59	-2.42835		b	2	9		384.044
411.876	497.155	y4^1	Q60605	Myl6	KVLGNPKSDEM	KVLGNPKSDEM(UniMod:35)	3	642.382	-2.42835		y	1	4		384.044
411.876	503.729	y9^2	Q60605	Myl6	KVLGNPKSDEM	KVLGNPKSDEM(UniMod:35)	3	101.685	-2.42835		y	2	9		384.044
411.876	512.319	b5^1	Q60605	Myl6	KVLGNPKSDEM	KVLGNPKSDEM(UniMod:35)	3	1218.61	-2.42835		b	1	5		384.044
411.876	534.788	b10^2	Q60605	Myl6	KVLGNPKSDEM	KVLGNPKSDEM(UniMod:35)	3	10000	-2.42835		b	2	10		384.044
411.876	553.263	y10^2	Q60605	Myl6	KVLGNPKSDEM	KVLGNPKSDEM(UniMod:35)	3	221.481	-2.42835		y	2	10		384.044
411.876	609.372	b6^1	Q60605	Myl6	KVLGNPKSDEM	KVLGNPKSDEM(UniMod:35)	3	437.567	-2.42835		b	1	6		384.044
411.876	625.25	y5^1	Q60605	Myl6	KVLGNPKSDEM	KVLGNPKSDEM(UniMod:35)	3	241.964	-2.42835		y	1	5		384.044
411.876	722.303	y6^1	Q60605	Myl6	KVLGNPKSDEM	KVLGNPKSDEM(UniMod:35)	3	1040.98	-2.42835		y	1	6		384.044
411.876	737.467	b7^1	Q60605	Myl6	KVLGNPKSDEM	KVLGNPKSDEM(UniMod:35)	3	311.86	-2.42835		b	1	7		384.044
411.876	824.499	b8^1	Q60605	Myl6	KVLGNPKSDEM	KVLGNPKSDEM(UniMod:35)	3	167.735	-2.42835		b	1	8		384.044
411.876	893.367	y8^1	Q60605	Myl6	KVLGNPKSDEM	KVLGNPKSDEM(UniMod:35)	3	210.648	-2.42835		y	1	8		384.044
411.876	939.526	b9^1	Q60605	Myl6	KVLGNPKSDEM	KVLGNPKSDEM(UniMod:35)	3	55.6133	-2.42835		b	1	9		384.044
411.886	129.066	b2^1	P29341	Pabpc1	AGVRNPQQHLN	AGVRNPQQHLN	3	807.672	-0.148309		b	1	2		418.927
411.886	133.061	y1^1	P29341	Pabpc1	AGVRNPQQHLN	AGVRNPQQHLN	3	1084.07	-0.148309		y	1	1		418.927
411.886	246.145	y2^1	P29341	Pabpc1	AGVRNPQQHLN	AGVRNPQQHLN	3	397.26	-0.148309		y	1	2		418.927
411.886	298.169	b6^2	P29341	Pabpc1	AGVRNPQQHLN	AGVRNPQQHLN	3	58.8581	-0.148309		b	2	6		418.927
411.886	362.198	b7^2	P29341	Pabpc1	AGVRNPQQHLN	AGVRNPQQHLN	3	1436.42	-0.148309		b	2	7		418.927
411.886	367.869	b10^3	P29341	Pabpc1	AGVRNPQQHLN	AGVRNPQQHLN	3	65.376	-0.148309		b	3	10		418.927
411.886	368.69	y6^2	P29341	Pabpc1	AGVRNPQQHLN	AGVRNPQQHLN	3	6021.34	-0.148309		y	2	6		418.927
411.886	383.204	y3^1	P29341	Pabpc1	AGVRNPQQHLN	AGVRNPQQHLN	3	1363.1	-0.148309		y	1	3		418.927
411.886	384.235	b4^1	P29341	Pabpc1	AGVRNPQQHLN	AGVRNPQQHLN	3	954.488	-0.148309		b	1	4		418.927
[truncated: 152,741 more rows]
