# Supplementary material for: Mass spectrometry-based thermostability profiling of virus-derived MHC peptide complexes serves as an effective predictor of immunogenicity
Source: Research Square preprint supplement (doi:10.21203/rs.3.rs-5824434/v1), 2025-02-03
Supplement: Supplementary file 5 [file 9823eff257d3357fa1922264.xlsx]

## Sheet: Raw output
File Name	Replicate Name	Peptide Sequence	Peptide Sequence Length	Molecule Formula	Peptide Modified Sequence	Peptide Modified Sequence Unimod Ids	Peptide Modified Sequence Three Letter Codes	Peptide Modified Sequence Full Names	Library Dot Product	Isotope Dot Product	Ratio Dot Product	Best Retention Time	Detection Q Value	Precursor Neutral Mass	Precursor Charge	Precursor Mz	Precursor Normalized Area	Predicted Retention Time	Total Area	Total Area MS1	Total Area Fragment	Total Background	Total Background MS1	Total Background Fragment	Total Area Ratio	Total Area Normalized	Protein Name	Protein Accession	Protein Species	Is Decoy
20221010_MS_zenoSWATH_DC24_VACV_37C_r1.wiff	37C_r1	LGGNEQVTR	9	C39H68N14O15	LGGNEQVTR	LGGNEQVTR	LGGNEQVTR	LGGNEQVTR	0.9724	#N/A	#N/A	8.24+/-0.02	0.0004	972.499	2	487.257	#N/A	8.24	1514252	#N/A	1514252	11652	#N/A	11652	#N/A	0.001609	Biognosys standards			FALSE
20221010_MS_zenoSWATH_DC24_VACV_37C_r2.wiff	37C_r2	LGGNEQVTR	9	C39H68N14O15	LGGNEQVTR	LGGNEQVTR	LGGNEQVTR	LGGNEQVTR	0.9804	#N/A	#N/A	8.24+/-0.02	0.0004	972.499	2	487.257	#N/A	8.24	1025413	#N/A	1025413	9578	#N/A	9578	#N/A	0.00161	Biognosys standards			FALSE
20221010_MS_zenoSWATH_DC24_VACV_37C_r3.wiff	37C_r3	LGGNEQVTR	9	C39H68N14O15	LGGNEQVTR	LGGNEQVTR	LGGNEQVTR	LGGNEQVTR	0.978	#N/A	#N/A	8.24+/-0.02	0.0004	972.499	2	487.257	#N/A	8.24	1254500	#N/A	1254500	13467	#N/A	13467	#N/A	0.001641	Biognosys standards			FALSE
20221010_MS_zenoSWATH_DC24_VACV_41C_r1.wiff	41C_r1	LGGNEQVTR	9	C39H68N14O15	LGGNEQVTR	LGGNEQVTR	LGGNEQVTR	LGGNEQVTR	0.9742	#N/A	#N/A	8.24+/-0.02	#N/A	972.499	2	487.257	#N/A	8.24	1974619	#N/A	1974619	4780	#N/A	4780	#N/A	0.002407	Biognosys standards			FALSE
20221010_MS_zenoSWATH_DC24_VACV_41C_r2.wiff	41C_r2	LGGNEQVTR	9	C39H68N14O15	LGGNEQVTR	LGGNEQVTR	LGGNEQVTR	LGGNEQVTR	0.9776	#N/A	#N/A	8.24+/-0.02	#N/A	972.499	2	487.257	#N/A	8.24	1099618	#N/A	1099618	13132	#N/A	13132	#N/A	0.001577	Biognosys standards			FALSE
20221010_MS_zenoSWATH_DC24_VACV_41C_r3.wiff	41C_r3	LGGNEQVTR	9	C39H68N14O15	LGGNEQVTR	LGGNEQVTR	LGGNEQVTR	LGGNEQVTR	0.9812	#N/A	#N/A	8.24+/-0.02	#N/A	972.499	2	487.257	#N/A	8.24	1342231	#N/A	1342231	14324	#N/A	14324	#N/A	0.001895	Biognosys standards			FALSE
20221010_MS_zenoSWATH_DC24_VACV_45C_r1.wiff	45C_r1	LGGNEQVTR	9	C39H68N14O15	LGGNEQVTR	LGGNEQVTR	LGGNEQVTR	LGGNEQVTR	0.9774	#N/A	#N/A	8.24+/-0.02	#N/A	972.499	2	487.257	#N/A	8.24	1563730	#N/A	1563730	9373	#N/A	9373	#N/A	0.00171	Biognosys standards			FALSE
20221010_MS_zenoSWATH_DC24_VACV_45C_r2.wiff	45C_r2	LGGNEQVTR	9	C39H68N14O15	LGGNEQVTR	LGGNEQVTR	LGGNEQVTR	LGGNEQVTR	0.9779	#N/A	#N/A	8.24+/-0.02	#N/A	972.499	2	487.257	#N/A	8.24	1051692	#N/A	1051692	13595	#N/A	13595	#N/A	0.001825	Biognosys standards			FALSE
20221010_MS_zenoSWATH_DC24_VACV_45C_r3.wiff	45C_r3	LGGNEQVTR	9	C39H68N14O15	LGGNEQVTR	LGGNEQVTR	LGGNEQVTR	LGGNEQVTR	0.976	#N/A	#N/A	8.24+/-0.02	#N/A	972.499	2	487.257	#N/A	8.24	1455889	#N/A	1455889	10287	#N/A	10287	#N/A	0.001679	Biognosys standards			FALSE
20221010_MS_zenoSWATH_DC24_VACV_49C_r1.wiff	49C_r1	LGGNEQVTR	9	C39H68N14O15	LGGNEQVTR	LGGNEQVTR	LGGNEQVTR	LGGNEQVTR	0.9783	#N/A	#N/A	8.24+/-0.02	#N/A	972.499	2	487.257	#N/A	8.24	1274749	#N/A	1274749	12544	#N/A	12544	#N/A	0.002682	Biognosys standards			FALSE
20221010_MS_zenoSWATH_DC24_VACV_49C_r2.wiff	49C_r2	LGGNEQVTR	9	C39H68N14O15	LGGNEQVTR	LGGNEQVTR	LGGNEQVTR	LGGNEQVTR	0.978	#N/A	#N/A	8.24+/-0.02	#N/A	972.499	2	487.257	#N/A	8.24	1346876	#N/A	1346876	7207	#N/A	7207	#N/A	0.00217	Biognosys standards			FALSE
20221010_MS_zenoSWATH_DC24_VACV_49C_r3.wiff	49C_r3	LGGNEQVTR	9	C39H68N14O15	LGGNEQVTR	LGGNEQVTR	LGGNEQVTR	LGGNEQVTR	0.9798	#N/A	#N/A	8.24+/-0.02	#N/A	972.499	2	487.257	#N/A	8.24	1041629	#N/A	1041629	5812	#N/A	5812	#N/A	0.002359	Biognosys standards			FALSE
20221010_MS_zenoSWATH_DC24_VACV_53C_r1.wiff	53C_r1	LGGNEQVTR	9	C39H68N14O15	LGGNEQVTR	LGGNEQVTR	LGGNEQVTR	LGGNEQVTR	0.9771	#N/A	#N/A	8.24+/-0.02	#N/A	972.499	2	487.257	#N/A	8.24	1411013	#N/A	1411013	18290	#N/A	18290	#N/A	0.002657	Biognosys standards			FALSE
20221010_MS_zenoSWATH_DC24_VACV_53C_r2.wiff	53C_r2	LGGNEQVTR	9	C39H68N14O15	LGGNEQVTR	LGGNEQVTR	LGGNEQVTR	LGGNEQVTR	0.9815	#N/A	#N/A	8.24+/-0.02	#N/A	972.499	2	487.257	#N/A	8.24	1280144	#N/A	1280144	12961	#N/A	12961	#N/A	0.003072	Biognosys standards			FALSE
20221010_MS_zenoSWATH_DC24_VACV_53C_r3.wiff	53C_r3	LGGNEQVTR	9	C39H68N14O15	LGGNEQVTR	LGGNEQVTR	LGGNEQVTR	LGGNEQVTR	0.9754	#N/A	#N/A	8.24+/-0.02	#N/A	972.499	2	487.257	#N/A	8.24	844596	#N/A	844596	8979	#N/A	8979	#N/A	0.002889	Biognosys standards			FALSE
20221010_MS_zenoSWATH_DC24_VACV_57C_r1.wiff	57C_r1	LGGNEQVTR	9	C39H68N14O15	LGGNEQVTR	LGGNEQVTR	LGGNEQVTR	LGGNEQVTR	0.9747	#N/A	#N/A	8.24+/-0.02	#N/A	972.499	2	487.257	#N/A	8.24	1023754	#N/A	1023754	13151	#N/A	13151	#N/A	0.004032	Biognosys standards			FALSE
20221010_MS_zenoSWATH_DC24_VACV_57C_r2.wiff	57C_r2	LGGNEQVTR	9	C39H68N14O15	LGGNEQVTR	LGGNEQVTR	LGGNEQVTR	LGGNEQVTR	0.9759	#N/A	#N/A	8.24+/-0.02	#N/A	972.499	2	487.257	#N/A	8.24	796952	#N/A	796952	6335	#N/A	6335	#N/A	0.004308	Biognosys standards			FALSE
20221010_MS_zenoSWATH_DC24_VACV_57C_r3.wiff	57C_r3	LGGNEQVTR	9	C39H68N14O15	LGGNEQVTR	LGGNEQVTR	LGGNEQVTR	LGGNEQVTR	0.9774	#N/A	#N/A	8.24+/-0.02	#N/A	972.499	2	487.257	#N/A	8.24	1104784	#N/A	1104784	13111	#N/A	13111	#N/A	0.004546	Biognosys standards			FALSE
20221010_MS_zenoSWATH_DC24_VACV_61C_r1.wiff	61C_r1	LGGNEQVTR	9	C39H68N14O15	LGGNEQVTR	LGGNEQVTR	LGGNEQVTR	LGGNEQVTR	0.9762	#N/A	#N/A	8.24+/-0.02	#N/A	972.499	2	487.257	#N/A	8.24	1250380	#N/A	1250380	10331	#N/A	10331	#N/A	0.003164	Biognosys standards			FALSE
20221010_MS_zenoSWATH_DC24_VACV_61C_r2.wiff	61C_r2	LGGNEQVTR	9	C39H68N14O15	LGGNEQVTR	LGGNEQVTR	LGGNEQVTR	LGGNEQVTR	0.9783	#N/A	#N/A	8.24+/-0.02	#N/A	972.499	2	487.257	#N/A	8.24	1356844	#N/A	1356844	2048	#N/A	2048	#N/A	0.004054	Biognosys standards			FALSE
20221010_MS_zenoSWATH_DC24_VACV_61C_r3.wiff	61C_r3	LGGNEQVTR	9	C39H68N14O15	LGGNEQVTR	LGGNEQVTR	LGGNEQVTR	LGGNEQVTR	0.9779	#N/A	#N/A	8.24+/-0.02	#N/A	972.499	2	487.257	#N/A	8.24	1029250	#N/A	1029250	19098	#N/A	19098	#N/A	0.003475	Biognosys standards			FALSE
20221010_MS_zenoSWATH_DC24_VACV_65C_r1.wiff	65C_r1	LGGNEQVTR	9	C39H68N14O15	LGGNEQVTR	LGGNEQVTR	LGGNEQVTR	LGGNEQVTR	0.9807	#N/A	#N/A	8.24+/-0.02	#N/A	972.499	2	487.257	#N/A	8.24	1300448	#N/A	1300448	11960	#N/A	11960	#N/A	0.004246	Biognosys standards			FALSE
20221010_MS_zenoSWATH_DC24_VACV_65C_r2.wiff	65C_r2	LGGNEQVTR	9	C39H68N14O15	LGGNEQVTR	LGGNEQVTR	LGGNEQVTR	LGGNEQVTR	0.9849	#N/A	#N/A	8.24+/-0.02	#N/A	972.499	2	487.257	#N/A	8.24	843724	#N/A	843724	11150	#N/A	11150	#N/A	0.005776	Biognosys standards			FALSE
20221010_MS_zenoSWATH_DC24_VACV_65C_r3.wiff	65C_r3	LGGNEQVTR	9	C39H68N14O15	LGGNEQVTR	LGGNEQVTR	LGGNEQVTR	LGGNEQVTR	0.9738	#N/A	#N/A	8.24+/-0.02	#N/A	972.499	2	487.257	#N/A	8.24	1775700	#N/A	1775700	7685	#N/A	7685	#N/A	0.005556	Biognosys standards			FALSE
20221010_MS_zenoSWATH_DC24_VACV_69C_r1.wiff	69C_r1	LGGNEQVTR	9	C39H68N14O15	LGGNEQVTR	LGGNEQVTR	LGGNEQVTR	LGGNEQVTR	0.9764	#N/A	#N/A	8.24+/-0.02	#N/A	972.499	2	487.257	#N/A	8.24	1118107	#N/A	1118107	17167	#N/A	17167	#N/A	0.004417	Biognosys standards			FALSE
20221010_MS_zenoSWATH_DC24_VACV_69C_r2.wiff	69C_r2	LGGNEQVTR	9	C39H68N14O15	LGGNEQVTR	LGGNEQVTR	LGGNEQVTR	LGGNEQVTR	0.9838	#N/A	#N/A	8.24+/-0.02	#N/A	972.499	2	487.257	#N/A	8.24	1313068	#N/A	1313068	4686	#N/A	4686	#N/A	0.004916	Biognosys standards			FALSE
20221010_MS_zenoSWATH_DC24_VACV_69C_r3.wiff	69C_r3	LGGNEQVTR	9	C39H68N14O15	LGGNEQVTR	LGGNEQVTR	LGGNEQVTR	LGGNEQVTR	0.9794	#N/A	#N/A	8.24+/-0.02	#N/A	972.499	2	487.257	#N/A	8.24	619089	#N/A	619089	6574	#N/A	6574	#N/A	0.00535	Biognosys standards			FALSE
20221010_MS_zenoSWATH_DC24_VACV_73C_r1.wiff	73C_r1	LGGNEQVTR	9	C39H68N14O15	LGGNEQVTR	LGGNEQVTR	LGGNEQVTR	LGGNEQVTR	0.9772	#N/A	#N/A	8.24+/-0.02	#N/A	972.499	2	487.257	#N/A	8.24	812777	#N/A	812777	7082	#N/A	7082	#N/A	0.005002	Biognosys standards			FALSE
20221010_MS_zenoSWATH_DC24_VACV_73C_r2.wiff	73C_r2	LGGNEQVTR	9	C39H68N14O15	LGGNEQVTR	LGGNEQVTR	LGGNEQVTR	LGGNEQVTR	0.9948	#N/A	#N/A	8.24+/-0.02	#N/A	972.499	2	487.257	#N/A	8.24	337102	#N/A	337102	0	#N/A	0	#N/A	0.002727	Biognosys standards			FALSE
20221010_MS_zenoSWATH_DC24_VACV_73C_r3.wiff	73C_r3	LGGNEQVTR	9	C39H68N14O15	LGGNEQVTR	LGGNEQVTR	LGGNEQVTR	LGGNEQVTR	0.9729	#N/A	#N/A	8.24+/-0.02	#N/A	972.499	2	487.257	#N/A	8.24	883835	#N/A	883835	9241	#N/A	9241	#N/A	0.003268	Biognosys standards			FALSE
20221010_MS_zenoSWATH_DC24_VACV_37C_r1.wiff	37C_r1	GAGSSEPVTGLDAK	14	C53H89N15O22	GAGSSEPVTGLDAK	GAGSSEPVTGLDAK	GAGSSEPVTGLDAK	GAGSSEPVTGLDAK	0.9733	#N/A	#N/A	14.74+/-0.01	0.0004	1287.63	2	644.823	#N/A	14.74	2728968	#N/A	2728968	20186	#N/A	20186	#N/A	0.002899	Biognosys standards			FALSE
20221010_MS_zenoSWATH_DC24_VACV_37C_r2.wiff	37C_r2	GAGSSEPVTGLDAK	14	C53H89N15O22	GAGSSEPVTGLDAK	GAGSSEPVTGLDAK	GAGSSEPVTGLDAK	GAGSSEPVTGLDAK	0.9777	#N/A	#N/A	14.74+/-0.01	0.0004	1287.63	2	644.823	#N/A	14.74	2051565	#N/A	2051565	10687	#N/A	10687	#N/A	0.003221	Biognosys standards			FALSE
20221010_MS_zenoSWATH_DC24_VACV_37C_r3.wiff	37C_r3	GAGSSEPVTGLDAK	14	C53H89N15O22	GAGSSEPVTGLDAK	GAGSSEPVTGLDAK	GAGSSEPVTGLDAK	GAGSSEPVTGLDAK	0.9797	#N/A	#N/A	14.74+/-0.01	0.0004	1287.63	2	644.823	#N/A	14.74	2383006	#N/A	2383006	30854	#N/A	30854	#N/A	0.003117	Biognosys standards			FALSE
20221010_MS_zenoSWATH_DC24_VACV_41C_r1.wiff	41C_r1	GAGSSEPVTGLDAK	14	C53H89N15O22	GAGSSEPVTGLDAK	GAGSSEPVTGLDAK	GAGSSEPVTGLDAK	GAGSSEPVTGLDAK	0.9709	#N/A	#N/A	14.74+/-0.01	#N/A	1287.63	2	644.823	#N/A	14.74	3576370	#N/A	3576370	26473	#N/A	26473	#N/A	0.00436	Biognosys standards			FALSE
20221010_MS_zenoSWATH_DC24_VACV_41C_r2.wiff	41C_r2	GAGSSEPVTGLDAK	14	C53H89N15O22	GAGSSEPVTGLDAK	GAGSSEPVTGLDAK	GAGSSEPVTGLDAK	GAGSSEPVTGLDAK	0.9793	#N/A	#N/A	14.74+/-0.01	#N/A	1287.63	2	644.823	#N/A	14.74	2276728	#N/A	2276728	8581	#N/A	8581	#N/A	0.003264	Biognosys standards			FALSE
20221010_MS_zenoSWATH_DC24_VACV_41C_r3.wiff	41C_r3	GAGSSEPVTGLDAK	14	C53H89N15O22	GAGSSEPVTGLDAK	GAGSSEPVTGLDAK	GAGSSEPVTGLDAK	GAGSSEPVTGLDAK	0.9706	#N/A	#N/A	14.74+/-0.01	#N/A	1287.63	2	644.823	#N/A	14.74	2551081	#N/A	2551081	19078	#N/A	19078	#N/A	0.003601	Biognosys standards			FALSE
20221010_MS_zenoSWATH_DC24_VACV_45C_r1.wiff	45C_r1	GAGSSEPVTGLDAK	14	C53H89N15O22	GAGSSEPVTGLDAK	GAGSSEPVTGLDAK	GAGSSEPVTGLDAK	GAGSSEPVTGLDAK	0.9749	#N/A	#N/A	14.74+/-0.01	#N/A	1287.63	2	644.823	#N/A	14.74	3150537	#N/A	3150537	24161	#N/A	24161	#N/A	0.003446	Biognosys standards			FALSE
20221010_MS_zenoSWATH_DC24_VACV_45C_r2.wiff	45C_r2	GAGSSEPVTGLDAK	14	C53H89N15O22	GAGSSEPVTGLDAK	GAGSSEPVTGLDAK	GAGSSEPVTGLDAK	GAGSSEPVTGLDAK	0.9748	#N/A	#N/A	14.74+/-0.01	#N/A	1287.63	2	644.823	#N/A	14.74	2069202	#N/A	2069202	19839	#N/A	19839	#N/A	0.003591	Biognosys standards			FALSE
20221010_MS_zenoSWATH_DC24_VACV_45C_r3.wiff	45C_r3	GAGSSEPVTGLDAK	14	C53H89N15O22	GAGSSEPVTGLDAK	GAGSSEPVTGLDAK	GAGSSEPVTGLDAK	GAGSSEPVTGLDAK	0.9764	#N/A	#N/A	14.74+/-0.01	#N/A	1287.63	2	644.823	#N/A	14.74	2838358	#N/A	2838358	23204	#N/A	23204	#N/A	0.003273	Biognosys standards			FALSE
20221010_MS_zenoSWATH_DC24_VACV_49C_r1.wiff	49C_r1	GAGSSEPVTGLDAK	14	C53H89N15O22	GAGSSEPVTGLDAK	GAGSSEPVTGLDAK	GAGSSEPVTGLDAK	GAGSSEPVTGLDAK	0.9803	#N/A	#N/A	14.74+/-0.01	#N/A	1287.63	2	644.823	#N/A	14.74	2417209	#N/A	2417209	24237	#N/A	24237	#N/A	0.005085	Biognosys standards			FALSE
20221010_MS_zenoSWATH_DC24_VACV_49C_r2.wiff	49C_r2	GAGSSEPVTGLDAK	14	C53H89N15O22	GAGSSEPVTGLDAK	GAGSSEPVTGLDAK	GAGSSEPVTGLDAK	GAGSSEPVTGLDAK	0.9807	#N/A	#N/A	14.74+/-0.01	#N/A	1287.63	2	644.823	#N/A	14.74	2498726	#N/A	2498726	17184	#N/A	17184	#N/A	0.004026	Biognosys standards			FALSE
20221010_MS_zenoSWATH_DC24_VACV_49C_r3.wiff	49C_r3	GAGSSEPVTGLDAK	14	C53H89N15O22	GAGSSEPVTGLDAK	GAGSSEPVTGLDAK	GAGSSEPVTGLDAK	GAGSSEPVTGLDAK	0.9809	#N/A	#N/A	14.74+/-0.01	#N/A	1287.63	2	644.823	#N/A	14.74	2059957	#N/A	2059957	8304	#N/A	8304	#N/A	0.004666	Biognosys standards			FALSE
20221010_MS_zenoSWATH_DC24_VACV_53C_r1.wiff	53C_r1	GAGSSEPVTGLDAK	14	C53H89N15O22	GAGSSEPVTGLDAK	GAGSSEPVTGLDAK	GAGSSEPVTGLDAK	GAGSSEPVTGLDAK	0.9807	#N/A	#N/A	14.74+/-0.01	#N/A	1287.63	2	644.823	#N/A	14.74	2638986	#N/A	2638986	15040	#N/A	15040	#N/A	0.004969	Biognosys standards			FALSE
20221010_MS_zenoSWATH_DC24_VACV_53C_r2.wiff	53C_r2	GAGSSEPVTGLDAK	14	C53H89N15O22	GAGSSEPVTGLDAK	GAGSSEPVTGLDAK	GAGSSEPVTGLDAK	GAGSSEPVTGLDAK	0.9796	#N/A	#N/A	14.74+/-0.01	#N/A	1287.63	2	644.823	#N/A	14.74	2557471	#N/A	2557471	21193	#N/A	21193	#N/A	0.006137	Biognosys standards			FALSE
20221010_MS_zenoSWATH_DC24_VACV_53C_r3.wiff	53C_r3	GAGSSEPVTGLDAK	14	C53H89N15O22	GAGSSEPVTGLDAK	GAGSSEPVTGLDAK	GAGSSEPVTGLDAK	GAGSSEPVTGLDAK	0.9813	#N/A	#N/A	14.74+/-0.01	#N/A	1287.63	2	644.823	#N/A	14.74	1594114	#N/A	1594114	13932	#N/A	13932	#N/A	0.005452	Biognosys standards			FALSE
20221010_MS_zenoSWATH_DC24_VACV_57C_r1.wiff	57C_r1	GAGSSEPVTGLDAK	14	C53H89N15O22	GAGSSEPVTGLDAK	GAGSSEPVTGLDAK	GAGSSEPVTGLDAK	GAGSSEPVTGLDAK	0.9779	#N/A	#N/A	14.74+/-0.01	#N/A	1287.63	2	644.823	#N/A	14.74	1978620	#N/A	1978620	11020	#N/A	11020	#N/A	0.007792	Biognosys standards			FALSE
20221010_MS_zenoSWATH_DC24_VACV_57C_r2.wiff	57C_r2	GAGSSEPVTGLDAK	14	C53H89N15O22	GAGSSEPVTGLDAK	GAGSSEPVTGLDAK	GAGSSEPVTGLDAK	GAGSSEPVTGLDAK	0.973	#N/A	#N/A	14.74+/-0.01	#N/A	1287.63	2	644.823	#N/A	14.74	1478252	#N/A	1478252	6812	#N/A	6812	#N/A	0.007991	Biognosys standards			FALSE
20221010_MS_zenoSWATH_DC24_VACV_57C_r3.wiff	57C_r3	GAGSSEPVTGLDAK	14	C53H89N15O22	GAGSSEPVTGLDAK	GAGSSEPVTGLDAK	GAGSSEPVTGLDAK	GAGSSEPVTGLDAK	0.9792	#N/A	#N/A	14.74+/-0.01	#N/A	1287.63	2	644.823	#N/A	14.74	2104546	#N/A	2104546	19144	#N/A	19144	#N/A	0.008659	Biognosys standards			FALSE
20221010_MS_zenoSWATH_DC24_VACV_61C_r1.wiff	61C_r1	GAGSSEPVTGLDAK	14	C53H89N15O22	GAGSSEPVTGLDAK	GAGSSEPVTGLDAK	GAGSSEPVTGLDAK	GAGSSEPVTGLDAK	0.9761	#N/A	#N/A	14.74+/-0.01	#N/A	1287.63	2	644.823	#N/A	14.74	2639870	#N/A	2639870	32568	#N/A	32568	#N/A	0.006681	Biognosys standards			FALSE
20221010_MS_zenoSWATH_DC24_VACV_61C_r2.wiff	61C_r2	GAGSSEPVTGLDAK	14	C53H89N15O22	GAGSSEPVTGLDAK	GAGSSEPVTGLDAK	GAGSSEPVTGLDAK	GAGSSEPVTGLDAK	0.9762	#N/A	#N/A	14.74+/-0.01	#N/A	1287.63	2	644.823	#N/A	14.74	2737693	#N/A	2737693	29818	#N/A	29818	#N/A	0.008179	Biognosys standards			FALSE
20221010_MS_zenoSWATH_DC24_VACV_61C_r3.wiff	61C_r3	GAGSSEPVTGLDAK	14	C53H89N15O22	GAGSSEPVTGLDAK	GAGSSEPVTGLDAK	GAGSSEPVTGLDAK	GAGSSEPVTGLDAK	0.9796	#N/A	#N/A	14.74+/-0.01	#N/A	1287.63	2	644.823	#N/A	14.74	2066362	#N/A	2066362	24034	#N/A	24034	#N/A	0.006976	Biognosys standards			FALSE
20221010_MS_zenoSWATH_DC24_VACV_65C_r1.wiff	65C_r1	GAGSSEPVTGLDAK	14	C53H89N15O22	GAGSSEPVTGLDAK	GAGSSEPVTGLDAK	GAGSSEPVTGLDAK	GAGSSEPVTGLDAK	0.9751	#N/A	#N/A	14.74+/-0.01	#N/A	1287.63	2	644.823	#N/A	14.74	2674462	#N/A	2674462	7267	#N/A	7267	#N/A	0.008733	Biognosys standards			FALSE
20221010_MS_zenoSWATH_DC24_VACV_65C_r2.wiff	65C_r2	GAGSSEPVTGLDAK	14	C53H89N15O22	GAGSSEPVTGLDAK	GAGSSEPVTGLDAK	GAGSSEPVTGLDAK	GAGSSEPVTGLDAK	0.9744	#N/A	#N/A	14.74+/-0.01	#N/A	1287.63	2	644.823	#N/A	14.74	1722488	#N/A	1722488	3857	#N/A	3857	#N/A	0.011791	Biognosys standards			FALSE
20221010_MS_zenoSWATH_DC24_VACV_65C_r3.wiff	65C_r3	GAGSSEPVTGLDAK	14	C53H89N15O22	GAGSSEPVTGLDAK	GAGSSEPVTGLDAK	GAGSSEPVTGLDAK	GAGSSEPVTGLDAK	0.9764	#N/A	#N/A	14.74+/-0.01	#N/A	1287.63	2	644.823	#N/A	14.74	3363601	#N/A	3363601	7983	#N/A	7983	#N/A	0.010524	Biognosys standards			FALSE
20221010_MS_zenoSWATH_DC24_VACV_69C_r1.wiff	69C_r1	GAGSSEPVTGLDAK	14	C53H89N15O22	GAGSSEPVTGLDAK	GAGSSEPVTGLDAK	GAGSSEPVTGLDAK	GAGSSEPVTGLDAK	0.9782	#N/A	#N/A	14.74+/-0.01	#N/A	1287.63	2	644.823	#N/A	14.74	2287085	#N/A	2287085	15697	#N/A	15697	#N/A	0.009035	Biognosys standards			FALSE
20221010_MS_zenoSWATH_DC24_VACV_69C_r2.wiff	69C_r2	GAGSSEPVTGLDAK	14	C53H89N15O22	GAGSSEPVTGLDAK	GAGSSEPVTGLDAK	GAGSSEPVTGLDAK	GAGSSEPVTGLDAK	0.9817	#N/A	#N/A	14.74+/-0.01	#N/A	1287.63	2	644.823	#N/A	14.74	2571452	#N/A	2571452	27528	#N/A	27528	#N/A	0.009626	Biognosys standards			FALSE
20221010_MS_zenoSWATH_DC24_VACV_69C_r3.wiff	69C_r3	GAGSSEPVTGLDAK	14	C53H89N15O22	GAGSSEPVTGLDAK	GAGSSEPVTGLDAK	GAGSSEPVTGLDAK	GAGSSEPVTGLDAK	0.9833	#N/A	#N/A	14.74+/-0.01	#N/A	1287.63	2	644.823	#N/A	14.74	1241992	#N/A	1241992	12899	#N/A	12899	#N/A	0.010733	Biognosys standards			FALSE
20221010_MS_zenoSWATH_DC24_VACV_73C_r1.wiff	73C_r1	GAGSSEPVTGLDAK	14	C53H89N15O22	GAGSSEPVTGLDAK	GAGSSEPVTGLDAK	GAGSSEPVTGLDAK	GAGSSEPVTGLDAK	0.9819	#N/A	#N/A	14.74+/-0.01	#N/A	1287.63	2	644.823	#N/A	14.74	1616318	#N/A	1616318	14382	#N/A	14382	#N/A	0.009947	Biognosys standards			FALSE
20221010_MS_zenoSWATH_DC24_VACV_73C_r2.wiff	73C_r2	GAGSSEPVTGLDAK	14	C53H89N15O22	GAGSSEPVTGLDAK	GAGSSEPVTGLDAK	GAGSSEPVTGLDAK	GAGSSEPVTGLDAK	0.9754	#N/A	#N/A	14.74+/-0.01	#N/A	1287.63	2	644.823	#N/A	14.74	648610	#N/A	648610	4247	#N/A	4247	#N/A	0.005248	Biognosys standards			FALSE
20221010_MS_zenoSWATH_DC24_VACV_73C_r3.wiff	73C_r3	GAGSSEPVTGLDAK	14	C53H89N15O22	GAGSSEPVTGLDAK	GAGSSEPVTGLDAK	GAGSSEPVTGLDAK	GAGSSEPVTGLDAK	0.9789	#N/A	#N/A	14.74+/-0.01	#N/A	1287.63	2	644.823	#N/A	14.74	1732239	#N/A	1732239	24531	#N/A	24531	#N/A	0.006405	Biognosys standards			FALSE
20221010_MS_zenoSWATH_DC24_VACV_37C_r1.wiff	37C_r1	VEATFGVDESNAK	13	C58H91N15O23	VEATFGVDESNAK	VEATFGVDESNAK	VEATFGVDESNAK	VEATFGVDESNAK	0.9652	#N/A	#N/A	17.59+/-0.01	0.0003	1365.64	2	683.828	#N/A	17.58	2378303	#N/A	2378303	9884	#N/A	9884	#N/A	0.002527	Biognosys standards			FALSE
20221010_MS_zenoSWATH_DC24_VACV_37C_r2.wiff	37C_r2	VEATFGVDESNAK	13	C58H91N15O23	VEATFGVDESNAK	VEATFGVDESNAK	VEATFGVDESNAK	VEATFGVDESNAK	0.9674	#N/A	#N/A	17.59+/-0.01	0.0004	1365.64	2	683.828	#N/A	17.58	1587810	#N/A	1587810	14653	#N/A	14653	#N/A	0.002493	Biognosys standards			FALSE
20221010_MS_zenoSWATH_DC24_VACV_37C_r3.wiff	37C_r3	VEATFGVDESNAK	13	C58H91N15O23	VEATFGVDESNAK	VEATFGVDESNAK	VEATFGVDESNAK	VEATFGVDESNAK	0.9691	#N/A	#N/A	17.59+/-0.01	0.0003	1365.64	2	683.828	#N/A	17.58	2006213	#N/A	2006213	10419	#N/A	10419	#N/A	0.002624	Biognosys standards			FALSE
20221010_MS_zenoSWATH_DC24_VACV_41C_r1.wiff	41C_r1	VEATFGVDESNAK	13	C58H91N15O23	VEATFGVDESNAK	VEATFGVDESNAK	VEATFGVDESNAK	VEATFGVDESNAK	0.9713	#N/A	#N/A	17.59+/-0.01	#N/A	1365.64	2	683.828	#N/A	17.58	2832101	#N/A	2832101	12486	#N/A	12486	#N/A	0.003453	Biognosys standards			FALSE
20221010_MS_zenoSWATH_DC24_VACV_41C_r2.wiff	41C_r2	VEATFGVDESNAK	13	C58H91N15O23	VEATFGVDESNAK	VEATFGVDESNAK	VEATFGVDESNAK	VEATFGVDESNAK	0.9696	#N/A	#N/A	17.59+/-0.01	#N/A	1365.64	2	683.828	#N/A	17.58	1714223	#N/A	1714223	36691	#N/A	36691	#N/A	0.002458	Biognosys standards			FALSE
20221010_MS_zenoSWATH_DC24_VACV_41C_r3.wiff	41C_r3	VEATFGVDESNAK	13	C58H91N15O23	VEATFGVDESNAK	VEATFGVDESNAK	VEATFGVDESNAK	VEATFGVDESNAK	0.9687	#N/A	#N/A	17.59+/-0.01	#N/A	1365.64	2	683.828	#N/A	17.58	1846225	#N/A	1846225	13966	#N/A	13966	#N/A	0.002606	Biognosys standards			FALSE
20221010_MS_zenoSWATH_DC24_VACV_45C_r1.wiff	45C_r1	VEATFGVDESNAK	13	C58H91N15O23	VEATFGVDESNAK	VEATFGVDESNAK	VEATFGVDESNAK	VEATFGVDESNAK	0.9691	#N/A	#N/A	17.59+/-0.01	#N/A	1365.64	2	683.828	#N/A	17.58	2486092	#N/A	2486092	16608	#N/A	16608	#N/A	0.002719	Biognosys standards			FALSE
20221010_MS_zenoSWATH_DC24_VACV_45C_r2.wiff	45C_r2	VEATFGVDESNAK	13	C58H91N15O23	VEATFGVDESNAK	VEATFGVDESNAK	VEATFGVDESNAK	VEATFGVDESNAK	0.9648	#N/A	#N/A	17.59+/-0.01	#N/A	1365.64	2	683.828	#N/A	17.58	1598073	#N/A	1598073	3765	#N/A	3765	#N/A	0.002773	Biognosys standards			FALSE
20221010_MS_zenoSWATH_DC24_VACV_45C_r3.wiff	45C_r3	VEATFGVDESNAK	13	C58H91N15O23	VEATFGVDESNAK	VEATFGVDESNAK	VEATFGVDESNAK	VEATFGVDESNAK	0.9637	#N/A	#N/A	17.59+/-0.01	#N/A	1365.64	2	683.828	#N/A	17.58	2173825	#N/A	2173825	3491	#N/A	3491	#N/A	0.002507	Biognosys standards			FALSE
20221010_MS_zenoSWATH_DC24_VACV_49C_r1.wiff	49C_r1	VEATFGVDESNAK	13	C58H91N15O23	VEATFGVDESNAK	VEATFGVDESNAK	VEATFGVDESNAK	VEATFGVDESNAK	0.9661	#N/A	#N/A	17.59+/-0.01	#N/A	1365.64	2	683.828	#N/A	17.58	1909192	#N/A	1909192	17689	#N/A	17689	#N/A	0.004017	Biognosys standards			FALSE
20221010_MS_zenoSWATH_DC24_VACV_49C_r2.wiff	49C_r2	VEATFGVDESNAK	13	C58H91N15O23	VEATFGVDESNAK	VEATFGVDESNAK	VEATFGVDESNAK	VEATFGVDESNAK	0.9678	#N/A	#N/A	17.59+/-0.01	#N/A	1365.64	2	683.828	#N/A	17.58	1936346	#N/A	1936346	20904	#N/A	20904	#N/A	0.00312	Biognosys standards			FALSE
20221010_MS_zenoSWATH_DC24_VACV_49C_r3.wiff	49C_r3	VEATFGVDESNAK	13	C58H91N15O23	VEATFGVDESNAK	VEATFGVDESNAK	VEATFGVDESNAK	VEATFGVDESNAK	0.9722	#N/A	#N/A	17.59+/-0.01	#N/A	1365.64	2	683.828	#N/A	17.58	1506724	#N/A	1506724	5854	#N/A	5854	#N/A	0.003413	Biognosys standards			FALSE
20221010_MS_zenoSWATH_DC24_VACV_53C_r1.wiff	53C_r1	VEATFGVDESNAK	13	C58H91N15O23	VEATFGVDESNAK	VEATFGVDESNAK	VEATFGVDESNAK	VEATFGVDESNAK	0.9711	#N/A	#N/A	17.59+/-0.01	#N/A	1365.64	2	683.828	#N/A	17.58	2062197	#N/A	2062197	19577	#N/A	19577	#N/A	0.003883	Biognosys standards			FALSE
20221010_MS_zenoSWATH_DC24_VACV_53C_r2.wiff	53C_r2	VEATFGVDESNAK	13	C58H91N15O23	VEATFGVDESNAK	VEATFGVDESNAK	VEATFGVDESNAK	VEATFGVDESNAK	0.9698	#N/A	#N/A	17.59+/-0.01	#N/A	1365.64	2	683.828	#N/A	17.58	1969563	#N/A	1969563	14277	#N/A	14277	#N/A	0.004726	Biognosys standards			FALSE
20221010_MS_zenoSWATH_DC24_VACV_53C_r3.wiff	53C_r3	VEATFGVDESNAK	13	C58H91N15O23	VEATFGVDESNAK	VEATFGVDESNAK	VEATFGVDESNAK	VEATFGVDESNAK	0.9682	#N/A	#N/A	17.59+/-0.01	#N/A	1365.64	2	683.828	#N/A	17.58	1184702	#N/A	1184702	2444	#N/A	2444	#N/A	0.004052	Biognosys standards			FALSE
20221010_MS_zenoSWATH_DC24_VACV_57C_r1.wiff	57C_r1	VEATFGVDESNAK	13	C58H91N15O23	VEATFGVDESNAK	VEATFGVDESNAK	VEATFGVDESNAK	VEATFGVDESNAK	0.9719	#N/A	#N/A	17.59+/-0.01	#N/A	1365.64	2	683.828	#N/A	17.58	1536487	#N/A	1536487	12310	#N/A	12310	#N/A	0.006051	Biognosys standards			FALSE
20221010_MS_zenoSWATH_DC24_VACV_57C_r2.wiff	57C_r2	VEATFGVDESNAK	13	C58H91N15O23	VEATFGVDESNAK	VEATFGVDESNAK	VEATFGVDESNAK	VEATFGVDESNAK	0.9613	#N/A	#N/A	17.59+/-0.01	#N/A	1365.64	2	683.828	#N/A	17.58	1159102	#N/A	1159102	8227	#N/A	8227	#N/A	0.006266	Biognosys standards			FALSE
20221010_MS_zenoSWATH_DC24_VACV_57C_r3.wiff	57C_r3	VEATFGVDESNAK	13	C58H91N15O23	VEATFGVDESNAK	VEATFGVDESNAK	VEATFGVDESNAK	VEATFGVDESNAK	0.9708	#N/A	#N/A	17.59+/-0.01	#N/A	1365.64	2	683.828	#N/A	17.58	1510843	#N/A	1510843	10968	#N/A	10968	#N/A	0.006216	Biognosys standards			FALSE
20221010_MS_zenoSWATH_DC24_VACV_61C_r1.wiff	61C_r1	VEATFGVDESNAK	13	C58H91N15O23	VEATFGVDESNAK	VEATFGVDESNAK	VEATFGVDESNAK	VEATFGVDESNAK	0.9665	#N/A	#N/A	17.59+/-0.01	#N/A	1365.64	2	683.828	#N/A	17.58	2013328	#N/A	2013328	17583	#N/A	17583	#N/A	0.005095	Biognosys standards			FALSE
20221010_MS_zenoSWATH_DC24_VACV_61C_r2.wiff	61C_r2	VEATFGVDESNAK	13	C58H91N15O23	VEATFGVDESNAK	VEATFGVDESNAK	VEATFGVDESNAK	VEATFGVDESNAK	0.9689	#N/A	#N/A	17.59+/-0.01	#N/A	1365.64	2	683.828	#N/A	17.58	2043378	#N/A	2043378	1852	#N/A	1852	#N/A	0.006105	Biognosys standards			FALSE
20221010_MS_zenoSWATH_DC24_VACV_61C_r3.wiff	61C_r3	VEATFGVDESNAK	13	C58H91N15O23	VEATFGVDESNAK	VEATFGVDESNAK	VEATFGVDESNAK	VEATFGVDESNAK	0.973	#N/A	#N/A	17.59+/-0.01	#N/A	1365.64	2	683.828	#N/A	17.58	1549411	#N/A	1549411	4878	#N/A	4878	#N/A	0.005231	Biognosys standards			FALSE
20221010_MS_zenoSWATH_DC24_VACV_65C_r1.wiff	65C_r1	VEATFGVDESNAK	13	C58H91N15O23	VEATFGVDESNAK	VEATFGVDESNAK	VEATFGVDESNAK	VEATFGVDESNAK	0.9724	#N/A	#N/A	17.59+/-0.01	#N/A	1365.64	2	683.828	#N/A	17.58	2193104	#N/A	2193104	16956	#N/A	16956	#N/A	0.007161	Biognosys standards			FALSE
20221010_MS_zenoSWATH_DC24_VACV_65C_r2.wiff	65C_r2	VEATFGVDESNAK	13	C58H91N15O23	VEATFGVDESNAK	VEATFGVDESNAK	VEATFGVDESNAK	VEATFGVDESNAK	0.9702	#N/A	#N/A	17.59+/-0.01	#N/A	1365.64	2	683.828	#N/A	17.58	1257627	#N/A	1257627	1845	#N/A	1845	#N/A	0.008609	Biognosys standards			FALSE
20221010_MS_zenoSWATH_DC24_VACV_65C_r3.wiff	65C_r3	VEATFGVDESNAK	13	C58H91N15O23	VEATFGVDESNAK	VEATFGVDESNAK	VEATFGVDESNAK	VEATFGVDESNAK	0.9673	#N/A	#N/A	17.59+/-0.01	#N/A	1365.64	2	683.828	#N/A	17.58	2481040	#N/A	2481040	29349	#N/A	29349	#N/A	0.007762	Biognosys standards			FALSE
20221010_MS_zenoSWATH_DC24_VACV_69C_r1.wiff	69C_r1	VEATFGVDESNAK	13	C58H91N15O23	VEATFGVDESNAK	VEATFGVDESNAK	VEATFGVDESNAK	VEATFGVDESNAK	0.9738	#N/A	#N/A	17.59+/-0.01	#N/A	1365.64	2	683.828	#N/A	17.58	1711167	#N/A	1711167	20161	#N/A	20161	#N/A	0.00676	Biognosys standards			FALSE
20221010_MS_zenoSWATH_DC24_VACV_69C_r2.wiff	69C_r2	VEATFGVDESNAK	13	C58H91N15O23	VEATFGVDESNAK	VEATFGVDESNAK	VEATFGVDESNAK	VEATFGVDESNAK	0.9658	#N/A	#N/A	17.59+/-0.01	#N/A	1365.64	2	683.828	#N/A	17.58	1787372	#N/A	1787372	30893	#N/A	30893	#N/A	0.006691	Biognosys standards			FALSE
20221010_MS_zenoSWATH_DC24_VACV_69C_r3.wiff	69C_r3	VEATFGVDESNAK	13	C58H91N15O23	VEATFGVDESNAK	VEATFGVDESNAK	VEATFGVDESNAK	VEATFGVDESNAK	0.9682	#N/A	#N/A	17.59+/-0.01	#N/A	1365.64	2	683.828	#N/A	17.58	832814	#N/A	832814	8962	#N/A	8962	#N/A	0.007197	Biognosys standards			FALSE
20221010_MS_zenoSWATH_DC24_VACV_73C_r1.wiff	73C_r1	VEATFGVDESNAK	13	C58H91N15O23	VEATFGVDESNAK	VEATFGVDESNAK	VEATFGVDESNAK	VEATFGVDESNAK	0.9665	#N/A	#N/A	17.59+/-0.01	#N/A	1365.64	2	683.828	#N/A	17.58	1180178	#N/A	1180178	7887	#N/A	7887	#N/A	0.007263	Biognosys standards			FALSE
20221010_MS_zenoSWATH_DC24_VACV_73C_r2.wiff	73C_r2	VEATFGVDESNAK	13	C58H91N15O23	VEATFGVDESNAK	VEATFGVDESNAK	VEATFGVDESNAK	VEATFGVDESNAK	0.9642	#N/A	#N/A	17.59+/-0.01	#N/A	1365.64	2	683.828	#N/A	17.58	466588	#N/A	466588	836	#N/A	836	#N/A	0.003775	Biognosys standards			FALSE
20221010_MS_zenoSWATH_DC24_VACV_73C_r3.wiff	73C_r3	VEATFGVDESNAK	13	C58H91N15O23	VEATFGVDESNAK	VEATFGVDESNAK	VEATFGVDESNAK	VEATFGVDESNAK	0.9675	#N/A	#N/A	17.59+/-0.01	#N/A	1365.64	2	683.828	#N/A	17.58	1255856	#N/A	1255856	518	#N/A	518	#N/A	0.004644	Biognosys standards			FALSE
20221010_MS_zenoSWATH_DC24_VACV_37C_r1.wiff	37C_r1	YILAGVENSK	10	C49H80N12O16	YILAGVENSK	YILAGVENSK	YILAGVENSK	YILAGVENSK	0.9432	#N/A	#N/A	19.59+/-0.02	0.0003	1092.58	2	547.298	#N/A	19.6	6358049	#N/A	6358049	55073	#N/A	55073	#N/A	0.006754	Biognosys standards			FALSE
20221010_MS_zenoSWATH_DC24_VACV_37C_r2.wiff	37C_r2	YILAGVENSK	10	C49H80N12O16	YILAGVENSK	YILAGVENSK	YILAGVENSK	YILAGVENSK	0.9641	#N/A	#N/A	19.59+/-0.02	0.0003	1092.58	2	547.298	#N/A	19.6	4427709	#N/A	4427709	34630	#N/A	34630	#N/A	0.006952	Biognosys standards			FALSE
20221010_MS_zenoSWATH_DC24_VACV_37C_r3.wiff	37C_r3	YILAGVENSK	10	C49H80N12O16	YILAGVENSK	YILAGVENSK	YILAGVENSK	YILAGVENSK	0.9543	#N/A	#N/A	19.59+/-0.02	0.0003	1092.58	2	547.298	#N/A	19.6	5582015	#N/A	5582015	45014	#N/A	45014	#N/A	0.007302	Biognosys standards			FALSE
20221010_MS_zenoSWATH_DC24_VACV_41C_r1.wiff	41C_r1	YILAGVENSK	10	C49H80N12O16	YILAGVENSK	YILAGVENSK	YILAGVENSK	YILAGVENSK	0.935	#N/A	#N/A	19.59+/-0.02	#N/A	1092.58	2	547.298	#N/A	19.6	7228050	#N/A	7228050	72271	#N/A	72271	#N/A	0.008812	Biognosys standards			FALSE
20221010_MS_zenoSWATH_DC24_VACV_41C_r2.wiff	41C_r2	YILAGVENSK	10	C49H80N12O16	YILAGVENSK	YILAGVENSK	YILAGVENSK	YILAGVENSK	0.9588	#N/A	#N/A	19.59+/-0.02	#N/A	1092.58	2	547.298	#N/A	19.6	4738372	#N/A	4738372	35033	#N/A	35033	#N/A	0.006793	Biognosys standards			FALSE
20221010_MS_zenoSWATH_DC24_VACV_41C_r3.wiff	41C_r3	YILAGVENSK	10	C49H80N12O16	YILAGVENSK	YILAGVENSK	YILAGVENSK	YILAGVENSK	0.9582	#N/A	#N/A	19.59+/-0.02	#N/A	1092.58	2	547.298	#N/A	19.6	5166329	#N/A	5166329	61135	#N/A	61135	#N/A	0.007292	Biognosys standards			FALSE
20221010_MS_zenoSWATH_DC24_VACV_45C_r1.wiff	45C_r1	YILAGVENSK	10	C49H80N12O16	YILAGVENSK	YILAGVENSK	YILAGVENSK	YILAGVENSK	0.9404	#N/A	#N/A	19.59+/-0.02	#N/A	1092.58	2	547.298	#N/A	19.6	6717005	#N/A	6717005	26410	#N/A	26410	#N/A	0.007346	Biognosys standards			FALSE
20221010_MS_zenoSWATH_DC24_VACV_45C_r2.wiff	45C_r2	YILAGVENSK	10	C49H80N12O16	YILAGVENSK	YILAGVENSK	YILAGVENSK	YILAGVENSK	0.9639	#N/A	#N/A	19.59+/-0.02	#N/A	1092.58	2	547.298	#N/A	19.6	4463083	#N/A	4463083	68178	#N/A	68178	#N/A	0.007745	Biognosys standards			FALSE
20221010_MS_zenoSWATH_DC24_VACV_45C_r3.wiff	45C_r3	YILAGVENSK	10	C49H80N12O16	YILAGVENSK	YILAGVENSK	YILAGVENSK	YILAGVENSK	0.9538	#N/A	#N/A	19.59+/-0.02	#N/A	1092.58	2	547.298	#N/A	19.6	5803029	#N/A	5803029	51965	#N/A	51965	#N/A	0.006692	Biognosys standards			FALSE
20221010_MS_zenoSWATH_DC24_VACV_49C_r1.wiff	49C_r1	YILAGVENSK	10	C49H80N12O16	YILAGVENSK	YILAGVENSK	YILAGVENSK	YILAGVENSK	0.9543	#N/A	#N/A	19.59+/-0.02	#N/A	1092.58	2	547.298	#N/A	19.6	5142353	#N/A	5142353	63985	#N/A	63985	#N/A	0.010819	Biognosys standards			FALSE
20221010_MS_zenoSWATH_DC24_VACV_49C_r2.wiff	49C_r2	YILAGVENSK	10	C49H80N12O16	YILAGVENSK	YILAGVENSK	YILAGVENSK	YILAGVENSK	0.9532	#N/A	#N/A	19.59+/-0.02	#N/A	1092.58	2	547.298	#N/A	19.6	5317539	#N/A	5317539	65497	#N/A	65497	#N/A	0.008567	Biognosys standards			FALSE
20221010_MS_zenoSWATH_DC24_VACV_49C_r3.wiff	49C_r3	YILAGVENSK	10	C49H80N12O16	YILAGVENSK	YILAGVENSK	YILAGVENSK	YILAGVENSK	0.9671	#N/A	#N/A	19.59+/-0.02	#N/A	1092.58	2	547.298	#N/A	19.6	4163614	#N/A	4163614	34303	#N/A	34303	#N/A	0.00943	Biognosys standards			FALSE
20221010_MS_zenoSWATH_DC24_VACV_53C_r1.wiff	53C_r1	YILAGVENSK	10	C49H80N12O16	YILAGVENSK	YILAGVENSK	YILAGVENSK	YILAGVENSK	0.9534	#N/A	#N/A	19.59+/-0.02	#N/A	1092.58	2	547.298	#N/A	19.6	5453284	#N/A	5453284	27070	#N/A	27070	#N/A	0.010268	Biognosys standards			FALSE
20221010_MS_zenoSWATH_DC24_VACV_53C_r2.wiff	53C_r2	YILAGVENSK	10	C49H80N12O16	YILAGVENSK	YILAGVENSK	YILAGVENSK	YILAGVENSK	0.9539	#N/A	#N/A	19.59+/-0.02	#N/A	1092.58	2	547.298	#N/A	19.6	5244012	#N/A	5244012	49845	#N/A	49845	#N/A	0.012583	Biognosys standards			FALSE
20221010_MS_zenoSWATH_DC24_VACV_53C_r3.wiff	53C_r3	YILAGVENSK	10	C49H80N12O16	YILAGVENSK	YILAGVENSK	YILAGVENSK	YILAGVENSK	0.9709	#N/A	#N/A	19.59+/-0.02	#N/A	1092.58	2	547.298	#N/A	19.6	3642633	#N/A	3642633	27778	#N/A	27778	#N/A	0.012459	Biognosys standards			FALSE
20221010_MS_zenoSWATH_DC24_VACV_57C_r1.wiff	57C_r1	YILAGVENSK	10	C49H80N12O16	YILAGVENSK	YILAGVENSK	YILAGVENSK	YILAGVENSK	0.9609	#N/A	#N/A	19.59+/-0.02	#N/A	1092.58	2	547.298	#N/A	19.6	4430508	#N/A	4430508	28213	#N/A	28213	#N/A	0.017447	Biognosys standards			FALSE
20221010_MS_zenoSWATH_DC24_VACV_57C_r2.wiff	57C_r2	YILAGVENSK	10	C49H80N12O16	YILAGVENSK	YILAGVENSK	YILAGVENSK	YILAGVENSK	0.9728	#N/A	#N/A	19.59+/-0.02	#N/A	1092.58	2	547.298	#N/A	19.6	3261252	#N/A	3261252	31844	#N/A	31844	#N/A	0.017629	Biognosys standards			FALSE
20221010_MS_zenoSWATH_DC24_VACV_57C_r3.wiff	57C_r3	YILAGVENSK	10	C49H80N12O16	YILAGVENSK	YILAGVENSK	YILAGVENSK	YILAGVENSK	0.9666	#N/A	#N/A	19.59+/-0.02	#N/A	1092.58	2	547.298	#N/A	19.6	4576787	#N/A	4576787	27595	#N/A	27595	#N/A	0.018831	Biognosys standards			FALSE
20221010_MS_zenoSWATH_DC24_VACV_61C_r1.wiff	61C_r1	YILAGVENSK	10	C49H80N12O16	YILAGVENSK	YILAGVENSK	YILAGVENSK	YILAGVENSK	0.9498	#N/A	#N/A	19.59+/-0.02	#N/A	1092.58	2	547.298	#N/A	19.6	5467728	#N/A	5467728	54370	#N/A	54370	#N/A	0.013837	Biognosys standards			FALSE
20221010_MS_zenoSWATH_DC24_VACV_61C_r2.wiff	61C_r2	YILAGVENSK	10	C49H80N12O16	YILAGVENSK	YILAGVENSK	YILAGVENSK	YILAGVENSK	0.9495	#N/A	#N/A	19.59+/-0.02	#N/A	1092.58	2	547.298	#N/A	19.6	5689275	#N/A	5689275	28661	#N/A	28661	#N/A	0.016997	Biognosys standards			FALSE
20221010_MS_zenoSWATH_DC24_VACV_61C_r3.wiff	61C_r3	YILAGVENSK	10	C49H80N12O16	YILAGVENSK	YILAGVENSK	YILAGVENSK	YILAGVENSK	0.9675	#N/A	#N/A	19.59+/-0.02	#N/A	1092.58	2	547.298	#N/A	19.6	4541167	#N/A	4541167	54349	#N/A	54349	#N/A	0.015331	Biognosys standards			FALSE
20221010_MS_zenoSWATH_DC24_VACV_65C_r1.wiff	65C_r1	YILAGVENSK	10	C49H80N12O16	YILAGVENSK	YILAGVENSK	YILAGVENSK	YILAGVENSK	0.9468	#N/A	#N/A	19.59+/-0.02	#N/A	1092.58	2	547.298	#N/A	19.6	5788498	#N/A	5788498	76475	#N/A	76475	#N/A	0.018901	Biognosys standards			FALSE
20221010_MS_zenoSWATH_DC24_VACV_65C_r2.wiff	65C_r2	YILAGVENSK	10	C49H80N12O16	YILAGVENSK	YILAGVENSK	YILAGVENSK	YILAGVENSK	0.9697	#N/A	#N/A	19.59+/-0.02	#N/A	1092.58	2	547.298	#N/A	19.6	3783513	#N/A	3783513	47321	#N/A	47321	#N/A	0.0259	Biognosys standards			FALSE
20221010_MS_zenoSWATH_DC24_VACV_65C_r3.wiff	65C_r3	YILAGVENSK	10	C49H80N12O16	YILAGVENSK	YILAGVENSK	YILAGVENSK	YILAGVENSK	0.9403	#N/A	#N/A	19.59+/-0.02	#N/A	1092.58	2	547.298	#N/A	19.6	7009072	#N/A	7009072	64000	#N/A	64000	#N/A	0.021929	Biognosys standards			FALSE
20221010_MS_zenoSWATH_DC24_VACV_69C_r1.wiff	69C_r1	YILAGVENSK	10	C49H80N12O16	YILAGVENSK	YILAGVENSK	YILAGVENSK	YILAGVENSK	0.957	#N/A	#N/A	19.59+/-0.02	#N/A	1092.58	2	547.298	#N/A	19.6	4892649	#N/A	4892649	21991	#N/A	21991	#N/A	0.019329	Biognosys standards			FALSE
20221010_MS_zenoSWATH_DC24_VACV_69C_r2.wiff	69C_r2	YILAGVENSK	10	C49H80N12O16	YILAGVENSK	YILAGVENSK	YILAGVENSK	YILAGVENSK	0.951	#N/A	#N/A	19.59+/-0.02	#N/A	1092.58	2	547.298	#N/A	19.6	5423670	#N/A	5423670	67255	#N/A	67255	#N/A	0.020304	Biognosys standards			FALSE
20221010_MS_zenoSWATH_DC24_VACV_69C_r3.wiff	69C_r3	YILAGVENSK	10	C49H80N12O16	YILAGVENSK	YILAGVENSK	YILAGVENSK	YILAGVENSK	0.9732	#N/A	#N/A	19.59+/-0.02	#N/A	1092.58	2	547.298	#N/A	19.6	2613204	#N/A	2613204	21242	#N/A	21242	#N/A	0.022583	Biognosys standards			FALSE
20221010_MS_zenoSWATH_DC24_VACV_73C_r1.wiff	73C_r1	YILAGVENSK	10	C49H80N12O16	YILAGVENSK	YILAGVENSK	YILAGVENSK	YILAGVENSK	0.966	#N/A	#N/A	19.59+/-0.02	#N/A	1092.58	2	547.298	#N/A	19.6	3519715	#N/A	3519715	33455	#N/A	33455	#N/A	0.02166	Biognosys standards			FALSE
20221010_MS_zenoSWATH_DC24_VACV_73C_r2.wiff	73C_r2	YILAGVENSK	10	C49H80N12O16	YILAGVENSK	YILAGVENSK	YILAGVENSK	YILAGVENSK	0.9724	#N/A	#N/A	19.59+/-0.02	#N/A	1092.58	2	547.298	#N/A	19.6	1454294	#N/A	1454294	939	#N/A	939	#N/A	0.011766	Biognosys standards			FALSE
20221010_MS_zenoSWATH_DC24_VACV_73C_r3.wiff	73C_r3	YILAGVENSK	10	C49H80N12O16	YILAGVENSK	YILAGVENSK	YILAGVENSK	YILAGVENSK	0.9697	#N/A	#N/A	19.59+/-0.02	#N/A	1092.58	2	547.298	#N/A	19.6	3873793	#N/A	3873793	37351	#N/A	37351	#N/A	0.014325	Biognosys standards			FALSE
20221010_MS_zenoSWATH_DC24_VACV_37C_r1.wiff	37C_r1	TPVISGGPYEYR	12	C61H91N15O19	TPVISGGPYEYR	TPVISGGPYEYR	TPVISGGPYEYR	TPVISGGPYEYR	0.9867	#N/A	#N/A	21.63+/-0.01	0.0003	1337.66	2	669.838	#N/A	21.64	3668716	#N/A	3668716	40676	#N/A	40676	#N/A	0.003897	Biognosys standards			FALSE
20221010_MS_zenoSWATH_DC24_VACV_37C_r2.wiff	37C_r2	TPVISGGPYEYR	12	C61H91N15O19	TPVISGGPYEYR	TPVISGGPYEYR	TPVISGGPYEYR	TPVISGGPYEYR	0.9891	#N/A	#N/A	21.63+/-0.01	0.0003	1337.66	2	669.838	#N/A	21.64	2570991	#N/A	2570991	14117	#N/A	14117	#N/A	0.004037	Biognosys standards			FALSE
20221010_MS_zenoSWATH_DC24_VACV_37C_r3.wiff	37C_r3	TPVISGGPYEYR	12	C61H91N15O19	TPVISGGPYEYR	TPVISGGPYEYR	TPVISGGPYEYR	TPVISGGPYEYR	0.9855	#N/A	#N/A	21.63+/-0.01	0.0003	1337.66	2	669.838	#N/A	21.64	3427193	#N/A	3427193	16270	#N/A	16270	#N/A	0.004483	Biognosys standards			FALSE
20221010_MS_zenoSWATH_DC24_VACV_41C_r1.wiff	41C_r1	TPVISGGPYEYR	12	C61H91N15O19	TPVISGGPYEYR	TPVISGGPYEYR	TPVISGGPYEYR	TPVISGGPYEYR	0.9867	#N/A	#N/A	21.63+/-0.01	#N/A	1337.66	2	669.838	#N/A	21.64	4276374	#N/A	4276374	34459	#N/A	34459	#N/A	0.005213	Biognosys standards			FALSE
20221010_MS_zenoSWATH_DC24_VACV_41C_r2.wiff	41C_r2	TPVISGGPYEYR	12	C61H91N15O19	TPVISGGPYEYR	TPVISGGPYEYR	TPVISGGPYEYR	TPVISGGPYEYR	0.9843	#N/A	#N/A	21.63+/-0.01	#N/A	1337.66	2	669.838	#N/A	21.64	2743580	#N/A	2743580	33616	#N/A	33616	#N/A	0.003933	Biognosys standards			FALSE
20221010_MS_zenoSWATH_DC24_VACV_41C_r3.wiff	41C_r3	TPVISGGPYEYR	12	C61H91N15O19	TPVISGGPYEYR	TPVISGGPYEYR	TPVISGGPYEYR	TPVISGGPYEYR	0.9849	#N/A	#N/A	21.63+/-0.01	#N/A	1337.66	2	669.838	#N/A	21.64	3005673	#N/A	3005673	37800	#N/A	37800	#N/A	0.004243	Biognosys standards			FALSE
20221010_MS_zenoSWATH_DC24_VACV_45C_r1.wiff	45C_r1	TPVISGGPYEYR	12	C61H91N15O19	TPVISGGPYEYR	TPVISGGPYEYR	TPVISGGPYEYR	TPVISGGPYEYR	0.9895	#N/A	#N/A	21.63+/-0.01	#N/A	1337.66	2	669.838	#N/A	21.64	4118681	#N/A	4118681	47239	#N/A	47239	#N/A	0.004505	Biognosys standards			FALSE
20221010_MS_zenoSWATH_DC24_VACV_45C_r2.wiff	45C_r2	TPVISGGPYEYR	12	C61H91N15O19	TPVISGGPYEYR	TPVISGGPYEYR	TPVISGGPYEYR	TPVISGGPYEYR	0.9847	#N/A	#N/A	21.63+/-0.01	#N/A	1337.66	2	669.838	#N/A	21.64	2551938	#N/A	2551938	34537	#N/A	34537	#N/A	0.004429	Biognosys standards			FALSE
20221010_MS_zenoSWATH_DC24_VACV_45C_r3.wiff	45C_r3	TPVISGGPYEYR	12	C61H91N15O19	TPVISGGPYEYR	TPVISGGPYEYR	TPVISGGPYEYR	TPVISGGPYEYR	0.9846	#N/A	#N/A	21.63+/-0.01	#N/A	1337.66	2	669.838	#N/A	21.64	3688795	#N/A	3688795	45934	#N/A	45934	#N/A	0.004254	Biognosys standards			FALSE
20221010_MS_zenoSWATH_DC24_VACV_49C_r1.wiff	49C_r1	TPVISGGPYEYR	12	C61H91N15O19	TPVISGGPYEYR	TPVISGGPYEYR	TPVISGGPYEYR	TPVISGGPYEYR	0.985	#N/A	#N/A	21.63+/-0.01	#N/A	1337.66	2	669.838	#N/A	21.64	2989249	#N/A	2989249	14634	#N/A	14634	#N/A	0.006289	Biognosys standards			FALSE
20221010_MS_zenoSWATH_DC24_VACV_49C_r2.wiff	49C_r2	TPVISGGPYEYR	12	C61H91N15O19	TPVISGGPYEYR	TPVISGGPYEYR	TPVISGGPYEYR	TPVISGGPYEYR	0.9848	#N/A	#N/A	21.63+/-0.01	#N/A	1337.66	2	669.838	#N/A	21.64	3072395	#N/A	3072395	65364	#N/A	65364	#N/A	0.00495	Biognosys standards			FALSE
20221010_MS_zenoSWATH_DC24_VACV_49C_r3.wiff	49C_r3	TPVISGGPYEYR	12	C61H91N15O19	TPVISGGPYEYR	TPVISGGPYEYR	TPVISGGPYEYR	TPVISGGPYEYR	0.9871	#N/A	#N/A	21.63+/-0.01	#N/A	1337.66	2	669.838	#N/A	21.64	2276802	#N/A	2276802	9527	#N/A	9527	#N/A	0.005157	Biognosys standards			FALSE
20221010_MS_zenoSWATH_DC24_VACV_53C_r1.wiff	53C_r1	TPVISGGPYEYR	12	C61H91N15O19	TPVISGGPYEYR	TPVISGGPYEYR	TPVISGGPYEYR	TPVISGGPYEYR	0.9857	#N/A	#N/A	21.63+/-0.01	#N/A	1337.66	2	669.838	#N/A	21.64	3283995	#N/A	3283995	32937	#N/A	32937	#N/A	0.006184	Biognosys standards			FALSE
20221010_MS_zenoSWATH_DC24_VACV_53C_r2.wiff	53C_r2	TPVISGGPYEYR	12	C61H91N15O19	TPVISGGPYEYR	TPVISGGPYEYR	TPVISGGPYEYR	TPVISGGPYEYR	0.9843	#N/A	#N/A	21.63+/-0.01	#N/A	1337.66	2	669.838	#N/A	21.64	2986937	#N/A	2986937	33282	#N/A	33282	#N/A	0.007167	Biognosys standards			FALSE
20221010_MS_zenoSWATH_DC24_VACV_53C_r3.wiff	53C_r3	TPVISGGPYEYR	12	C61H91N15O19	TPVISGGPYEYR	TPVISGGPYEYR	TPVISGGPYEYR	TPVISGGPYEYR	0.9865	#N/A	#N/A	21.63+/-0.01	#N/A	1337.66	2	669.838	#N/A	21.64	1923323	#N/A	1923323	9408	#N/A	9408	#N/A	0.006578	Biognosys standards			FALSE
20221010_MS_zenoSWATH_DC24_VACV_57C_r1.wiff	57C_r1	TPVISGGPYEYR	12	C61H91N15O19	TPVISGGPYEYR	TPVISGGPYEYR	TPVISGGPYEYR	TPVISGGPYEYR	0.9842	#N/A	#N/A	21.63+/-0.01	#N/A	1337.66	2	669.838	#N/A	21.64	2529270	#N/A	2529270	35260	#N/A	35260	#N/A	0.00996	Biognosys standards			FALSE
20221010_MS_zenoSWATH_DC24_VACV_57C_r2.wiff	57C_r2	TPVISGGPYEYR	12	C61H91N15O19	TPVISGGPYEYR	TPVISGGPYEYR	TPVISGGPYEYR	TPVISGGPYEYR	0.9832	#N/A	#N/A	21.63+/-0.01	#N/A	1337.66	2	669.838	#N/A	21.64	1831375	#N/A	1831375	11822	#N/A	11822	#N/A	0.0099	Biognosys standards			FALSE
20221010_MS_zenoSWATH_DC24_VACV_57C_r3.wiff	57C_r3	TPVISGGPYEYR	12	C61H91N15O19	TPVISGGPYEYR	TPVISGGPYEYR	TPVISGGPYEYR	TPVISGGPYEYR	0.9832	#N/A	#N/A	21.63+/-0.01	#N/A	1337.66	2	669.838	#N/A	21.64	2556569	#N/A	2556569	45331	#N/A	45331	#N/A	0.010519	Biognosys standards			FALSE
20221010_MS_zenoSWATH_DC24_VACV_61C_r1.wiff	61C_r1	TPVISGGPYEYR	12	C61H91N15O19	TPVISGGPYEYR	TPVISGGPYEYR	TPVISGGPYEYR	TPVISGGPYEYR	0.9897	#N/A	#N/A	21.63+/-0.01	#N/A	1337.66	2	669.838	#N/A	21.64	3366128	#N/A	3366128	56166	#N/A	56166	#N/A	0.008519	Biognosys standards			FALSE
20221010_MS_zenoSWATH_DC24_VACV_61C_r2.wiff	61C_r2	TPVISGGPYEYR	12	C61H91N15O19	TPVISGGPYEYR	TPVISGGPYEYR	TPVISGGPYEYR	TPVISGGPYEYR	0.9857	#N/A	#N/A	21.63+/-0.01	#N/A	1337.66	2	669.838	#N/A	21.64	3328125	#N/A	3328125	33687	#N/A	33687	#N/A	0.009943	Biognosys standards			FALSE
20221010_MS_zenoSWATH_DC24_VACV_61C_r3.wiff	61C_r3	TPVISGGPYEYR	12	C61H91N15O19	TPVISGGPYEYR	TPVISGGPYEYR	TPVISGGPYEYR	TPVISGGPYEYR	0.9894	#N/A	#N/A	21.63+/-0.01	#N/A	1337.66	2	669.838	#N/A	21.64	2534072	#N/A	2534072	39267	#N/A	39267	#N/A	0.008555	Biognosys standards			FALSE
20221010_MS_zenoSWATH_DC24_VACV_65C_r1.wiff	65C_r1	TPVISGGPYEYR	12	C61H91N15O19	TPVISGGPYEYR	TPVISGGPYEYR	TPVISGGPYEYR	TPVISGGPYEYR	0.9876	#N/A	#N/A	21.63+/-0.01	#N/A	1337.66	2	669.838	#N/A	21.64	3492267	#N/A	3492267	39641	#N/A	39641	#N/A	0.011403	Biognosys standards			FALSE
20221010_MS_zenoSWATH_DC24_VACV_65C_r2.wiff	65C_r2	TPVISGGPYEYR	12	C61H91N15O19	TPVISGGPYEYR	TPVISGGPYEYR	TPVISGGPYEYR	TPVISGGPYEYR	0.9872	#N/A	#N/A	21.63+/-0.01	#N/A	1337.66	2	669.838	#N/A	21.64	2020279	#N/A	2020279	24536	#N/A	24536	#N/A	0.01383	Biognosys standards			FALSE
20221010_MS_zenoSWATH_DC24_VACV_65C_r3.wiff	65C_r3	TPVISGGPYEYR	12	C61H91N15O19	TPVISGGPYEYR	TPVISGGPYEYR	TPVISGGPYEYR	TPVISGGPYEYR	0.9876	#N/A	#N/A	21.63+/-0.01	#N/A	1337.66	2	669.838	#N/A	21.64	4099051	#N/A	4099051	32227	#N/A	32227	#N/A	0.012825	Biognosys standards			FALSE
20221010_MS_zenoSWATH_DC24_VACV_69C_r1.wiff	69C_r1	TPVISGGPYEYR	12	C61H91N15O19	TPVISGGPYEYR	TPVISGGPYEYR	TPVISGGPYEYR	TPVISGGPYEYR	0.9865	#N/A	#N/A	21.63+/-0.01	#N/A	1337.66	2	669.838	#N/A	21.64	2851125	#N/A	2851125	42499	#N/A	42499	#N/A	0.011264	Biognosys standards			FALSE
20221010_MS_zenoSWATH_DC24_VACV_69C_r2.wiff	69C_r2	TPVISGGPYEYR	12	C61H91N15O19	TPVISGGPYEYR	TPVISGGPYEYR	TPVISGGPYEYR	TPVISGGPYEYR	0.9866	#N/A	#N/A	21.63+/-0.01	#N/A	1337.66	2	669.838	#N/A	21.64	3170290	#N/A	3170290	51815	#N/A	51815	#N/A	0.011868	Biognosys standards			FALSE
20221010_MS_zenoSWATH_DC24_VACV_69C_r3.wiff	69C_r3	TPVISGGPYEYR	12	C61H91N15O19	TPVISGGPYEYR	TPVISGGPYEYR	TPVISGGPYEYR	TPVISGGPYEYR	0.9836	#N/A	#N/A	21.63+/-0.01	#N/A	1337.66	2	669.838	#N/A	21.64	1395935	#N/A	1395935	14999	#N/A	14999	#N/A	0.012064	Biognosys standards			FALSE
20221010_MS_zenoSWATH_DC24_VACV_73C_r1.wiff	73C_r1	TPVISGGPYEYR	12	C61H91N15O19	TPVISGGPYEYR	TPVISGGPYEYR	TPVISGGPYEYR	TPVISGGPYEYR	0.9852	#N/A	#N/A	21.63+/-0.01	#N/A	1337.66	2	669.838	#N/A	21.64	1913012	#N/A	1913012	8506	#N/A	8506	#N/A	0.011773	Biognosys standards			FALSE
20221010_MS_zenoSWATH_DC24_VACV_73C_r2.wiff	73C_r2	TPVISGGPYEYR	12	C61H91N15O19	TPVISGGPYEYR	TPVISGGPYEYR	TPVISGGPYEYR	TPVISGGPYEYR	0.977	#N/A	#N/A	21.63+/-0.01	#N/A	1337.66	2	669.838	#N/A	21.64	801353	#N/A	801353	11405	#N/A	11405	#N/A	0.006483	Biognosys standards			FALSE
20221010_MS_zenoSWATH_DC24_VACV_73C_r3.wiff	73C_r3	TPVISGGPYEYR	12	C61H91N15O19	TPVISGGPYEYR	TPVISGGPYEYR	TPVISGGPYEYR	TPVISGGPYEYR	0.9842	#N/A	#N/A	21.63+/-0.01	#N/A	1337.66	2	669.838	#N/A	21.64	2059151	#N/A	2059151	33576	#N/A	33576	#N/A	0.007614	Biognosys standards			FALSE
20221010_MS_zenoSWATH_DC24_VACV_37C_r1.wiff	37C_r1	TPVITGAPYEYR	12	C63H95N15O19	TPVITGAPYEYR	TPVITGAPYEYR	TPVITGAPYEYR	TPVITGAPYEYR	0.9614	#N/A	#N/A	22.92+/-0.01	0.0003	1365.69	2	683.854	#N/A	22.92	5267084	#N/A	5267084	41165	#N/A	41165	#N/A	0.005595	Biognosys standards			FALSE
20221010_MS_zenoSWATH_DC24_VACV_37C_r2.wiff	37C_r2	TPVITGAPYEYR	12	C63H95N15O19	TPVITGAPYEYR	TPVITGAPYEYR	TPVITGAPYEYR	TPVITGAPYEYR	0.9645	#N/A	#N/A	22.92+/-0.01	0.0003	1365.69	2	683.854	#N/A	22.92	3843484	#N/A	3843484	34387	#N/A	34387	#N/A	0.006035	Biognosys standards			FALSE
20221010_MS_zenoSWATH_DC24_VACV_37C_r3.wiff	37C_r3	TPVITGAPYEYR	12	C63H95N15O19	TPVITGAPYEYR	TPVITGAPYEYR	TPVITGAPYEYR	TPVITGAPYEYR	0.9658	#N/A	#N/A	22.92+/-0.01	0.0003	1365.69	2	683.854	#N/A	22.92	4538368	#N/A	4538368	70366	#N/A	70366	#N/A	0.005937	Biognosys standards			FALSE
20221010_MS_zenoSWATH_DC24_VACV_41C_r1.wiff	41C_r1	TPVITGAPYEYR	12	C63H95N15O19	TPVITGAPYEYR	TPVITGAPYEYR	TPVITGAPYEYR	TPVITGAPYEYR	0.9585	#N/A	#N/A	22.92+/-0.01	#N/A	1365.69	2	683.854	#N/A	22.92	6095532	#N/A	6095532	41527	#N/A	41527	#N/A	0.007431	Biognosys standards			FALSE
20221010_MS_zenoSWATH_DC24_VACV_41C_r2.wiff	41C_r2	TPVITGAPYEYR	12	C63H95N15O19	TPVITGAPYEYR	TPVITGAPYEYR	TPVITGAPYEYR	TPVITGAPYEYR	0.9635	#N/A	#N/A	22.92+/-0.01	#N/A	1365.69	2	683.854	#N/A	22.92	4018717	#N/A	4018717	57765	#N/A	57765	#N/A	0.005762	Biognosys standards			FALSE
20221010_MS_zenoSWATH_DC24_VACV_41C_r3.wiff	41C_r3	TPVITGAPYEYR	12	C63H95N15O19	TPVITGAPYEYR	TPVITGAPYEYR	TPVITGAPYEYR	TPVITGAPYEYR	0.9648	#N/A	#N/A	22.92+/-0.01	#N/A	1365.69	2	683.854	#N/A	22.92	4234912	#N/A	4234912	29537	#N/A	29537	#N/A	0.005978	Biognosys standards			FALSE
20221010_MS_zenoSWATH_DC24_VACV_45C_r1.wiff	45C_r1	TPVITGAPYEYR	12	C63H95N15O19	TPVITGAPYEYR	TPVITGAPYEYR	TPVITGAPYEYR	TPVITGAPYEYR	0.957	#N/A	#N/A	22.92+/-0.01	#N/A	1365.69	2	683.854	#N/A	22.92	5883858	#N/A	5883858	50066	#N/A	50066	#N/A	0.006435	Biognosys standards			FALSE
20221010_MS_zenoSWATH_DC24_VACV_45C_r2.wiff	45C_r2	TPVITGAPYEYR	12	C63H95N15O19	TPVITGAPYEYR	TPVITGAPYEYR	TPVITGAPYEYR	TPVITGAPYEYR	0.9684	#N/A	#N/A	22.92+/-0.01	#N/A	1365.69	2	683.854	#N/A	22.92	3673217	#N/A	3673217	30472	#N/A	30472	#N/A	0.006375	Biognosys standards			FALSE
20221010_MS_zenoSWATH_DC24_VACV_45C_r3.wiff	45C_r3	TPVITGAPYEYR	12	C63H95N15O19	TPVITGAPYEYR	TPVITGAPYEYR	TPVITGAPYEYR	TPVITGAPYEYR	0.9641	#N/A	#N/A	22.92+/-0.01	#N/A	1365.69	2	683.854	#N/A	22.92	5069464	#N/A	5069464	88428	#N/A	88428	#N/A	0.005846	Biognosys standards			FALSE
20221010_MS_zenoSWATH_DC24_VACV_49C_r1.wiff	49C_r1	TPVITGAPYEYR	12	C63H95N15O19	TPVITGAPYEYR	TPVITGAPYEYR	TPVITGAPYEYR	TPVITGAPYEYR	0.9652	#N/A	#N/A	22.92+/-0.01	#N/A	1365.69	2	683.854	#N/A	22.92	4358400	#N/A	4358400	40282	#N/A	40282	#N/A	0.009169	Biognosys standards			FALSE
20221010_MS_zenoSWATH_DC24_VACV_49C_r2.wiff	49C_r2	TPVITGAPYEYR	12	C63H95N15O19	TPVITGAPYEYR	TPVITGAPYEYR	TPVITGAPYEYR	TPVITGAPYEYR	0.9645	#N/A	#N/A	22.92+/-0.01	#N/A	1365.69	2	683.854	#N/A	22.92	4520162	#N/A	4520162	33211	#N/A	33211	#N/A	0.007283	Biognosys standards			FALSE
20221010_MS_zenoSWATH_DC24_VACV_49C_r3.wiff	49C_r3	TPVITGAPYEYR	12	C63H95N15O19	TPVITGAPYEYR	TPVITGAPYEYR	TPVITGAPYEYR	TPVITGAPYEYR	0.9665	#N/A	#N/A	22.92+/-0.01	#N/A	1365.69	2	683.854	#N/A	22.92	3385973	#N/A	3385973	16969	#N/A	16969	#N/A	0.007669	Biognosys standards			FALSE
20221010_MS_zenoSWATH_DC24_VACV_53C_r1.wiff	53C_r1	TPVITGAPYEYR	12	C63H95N15O19	TPVITGAPYEYR	TPVITGAPYEYR	TPVITGAPYEYR	TPVITGAPYEYR	0.9628	#N/A	#N/A	22.92+/-0.01	#N/A	1365.69	2	683.854	#N/A	22.92	4835902	#N/A	4835902	68612	#N/A	68612	#N/A	0.009106	Biognosys standards			FALSE
20221010_MS_zenoSWATH_DC24_VACV_53C_r2.wiff	53C_r2	TPVITGAPYEYR	12	C63H95N15O19	TPVITGAPYEYR	TPVITGAPYEYR	TPVITGAPYEYR	TPVITGAPYEYR	0.967	#N/A	#N/A	22.92+/-0.01	#N/A	1365.69	2	683.854	#N/A	22.92	4268344	#N/A	4268344	41701	#N/A	41701	#N/A	0.010242	Biognosys standards			FALSE
20221010_MS_zenoSWATH_DC24_VACV_53C_r3.wiff	53C_r3	TPVITGAPYEYR	12	C63H95N15O19	TPVITGAPYEYR	TPVITGAPYEYR	TPVITGAPYEYR	TPVITGAPYEYR	0.9642	#N/A	#N/A	22.92+/-0.01	#N/A	1365.69	2	683.854	#N/A	22.92	2780118	#N/A	2780118	53169	#N/A	53169	#N/A	0.009509	Biognosys standards			FALSE
20221010_MS_zenoSWATH_DC24_VACV_57C_r1.wiff	57C_r1	TPVITGAPYEYR	12	C63H95N15O19	TPVITGAPYEYR	TPVITGAPYEYR	TPVITGAPYEYR	TPVITGAPYEYR	0.967	#N/A	#N/A	22.92+/-0.01	#N/A	1365.69	2	683.854	#N/A	22.92	3678710	#N/A	3678710	74446	#N/A	74446	#N/A	0.014487	Biognosys standards			FALSE
20221010_MS_zenoSWATH_DC24_VACV_57C_r2.wiff	57C_r2	TPVITGAPYEYR	12	C63H95N15O19	TPVITGAPYEYR	TPVITGAPYEYR	TPVITGAPYEYR	TPVITGAPYEYR	0.9712	#N/A	#N/A	22.92+/-0.01	#N/A	1365.69	2	683.854	#N/A	22.92	2698447	#N/A	2698447	43399	#N/A	43399	#N/A	0.014587	Biognosys standards			FALSE
20221010_MS_zenoSWATH_DC24_VACV_57C_r3.wiff	57C_r3	TPVITGAPYEYR	12	C63H95N15O19	TPVITGAPYEYR	TPVITGAPYEYR	TPVITGAPYEYR	TPVITGAPYEYR	0.9631	#N/A	#N/A	22.92+/-0.01	#N/A	1365.69	2	683.854	#N/A	22.92	3709405	#N/A	3709405	39544	#N/A	39544	#N/A	0.015262	Biognosys standards			FALSE
20221010_MS_zenoSWATH_DC24_VACV_61C_r1.wiff	61C_r1	TPVITGAPYEYR	12	C63H95N15O19	TPVITGAPYEYR	TPVITGAPYEYR	TPVITGAPYEYR	TPVITGAPYEYR	0.9589	#N/A	#N/A	22.92+/-0.01	#N/A	1365.69	2	683.854	#N/A	22.92	4775812	#N/A	4775812	81076	#N/A	81076	#N/A	0.012086	Biognosys standards			FALSE
20221010_MS_zenoSWATH_DC24_VACV_61C_r2.wiff	61C_r2	TPVITGAPYEYR	12	C63H95N15O19	TPVITGAPYEYR	TPVITGAPYEYR	TPVITGAPYEYR	TPVITGAPYEYR	0.9629	#N/A	#N/A	22.92+/-0.01	#N/A	1365.69	2	683.854	#N/A	22.92	4866045	#N/A	4866045	90850	#N/A	90850	#N/A	0.014537	Biognosys standards			FALSE
20221010_MS_zenoSWATH_DC24_VACV_61C_r3.wiff	61C_r3	TPVITGAPYEYR	12	C63H95N15O19	TPVITGAPYEYR	TPVITGAPYEYR	TPVITGAPYEYR	TPVITGAPYEYR	0.9648	#N/A	#N/A	22.92+/-0.01	#N/A	1365.69	2	683.854	#N/A	22.92	3814818	#N/A	3814818	51713	#N/A	51713	#N/A	0.012879	Biognosys standards			FALSE
20221010_MS_zenoSWATH_DC24_VACV_65C_r1.wiff	65C_r1	TPVITGAPYEYR	12	C63H95N15O19	TPVITGAPYEYR	TPVITGAPYEYR	TPVITGAPYEYR	TPVITGAPYEYR	0.9625	#N/A	#N/A	22.92+/-0.01	#N/A	1365.69	2	683.854	#N/A	22.92	5030418	#N/A	5030418	22148	#N/A	22148	#N/A	0.016425	Biognosys standards			FALSE
20221010_MS_zenoSWATH_DC24_VACV_65C_r2.wiff	65C_r2	TPVITGAPYEYR	12	C63H95N15O19	TPVITGAPYEYR	TPVITGAPYEYR	TPVITGAPYEYR	TPVITGAPYEYR	0.9656	#N/A	#N/A	22.92+/-0.01	#N/A	1365.69	2	683.854	#N/A	22.92	2893381	#N/A	2893381	27043	#N/A	27043	#N/A	0.019806	Biognosys standards			FALSE
20221010_MS_zenoSWATH_DC24_VACV_65C_r3.wiff	65C_r3	TPVITGAPYEYR	12	C63H95N15O19	TPVITGAPYEYR	TPVITGAPYEYR	TPVITGAPYEYR	TPVITGAPYEYR	0.9625	#N/A	#N/A	22.92+/-0.01	#N/A	1365.69	2	683.854	#N/A	22.92	5689639	#N/A	5689639	80062	#N/A	80062	#N/A	0.017801	Biognosys standards			FALSE
20221010_MS_zenoSWATH_DC24_VACV_69C_r1.wiff	69C_r1	TPVITGAPYEYR	12	C63H95N15O19	TPVITGAPYEYR	TPVITGAPYEYR	TPVITGAPYEYR	TPVITGAPYEYR	0.9661	#N/A	#N/A	22.92+/-0.01	#N/A	1365.69	2	683.854	#N/A	22.92	4077585	#N/A	4077585	69759	#N/A	69759	#N/A	0.016109	Biognosys standards			FALSE
20221010_MS_zenoSWATH_DC24_VACV_69C_r2.wiff	69C_r2	TPVITGAPYEYR	12	C63H95N15O19	TPVITGAPYEYR	TPVITGAPYEYR	TPVITGAPYEYR	TPVITGAPYEYR	0.9623	#N/A	#N/A	22.92+/-0.01	#N/A	1365.69	2	683.854	#N/A	22.92	4463026	#N/A	4463026	35419	#N/A	35419	#N/A	0.016707	Biognosys standards			FALSE
20221010_MS_zenoSWATH_DC24_VACV_69C_r3.wiff	69C_r3	TPVITGAPYEYR	12	C63H95N15O19	TPVITGAPYEYR	TPVITGAPYEYR	TPVITGAPYEYR	TPVITGAPYEYR	0.9631	#N/A	#N/A	22.92+/-0.01	#N/A	1365.69	2	683.854	#N/A	22.92	2051157	#N/A	2051157	20946	#N/A	20946	#N/A	0.017726	Biognosys standards			FALSE
20221010_MS_zenoSWATH_DC24_VACV_73C_r1.wiff	73C_r1	TPVITGAPYEYR	12	C63H95N15O19	TPVITGAPYEYR	TPVITGAPYEYR	TPVITGAPYEYR	TPVITGAPYEYR	0.9631	#N/A	#N/A	22.92+/-0.01	#N/A	1365.69	2	683.854	#N/A	22.92	2827467	#N/A	2827467	26965	#N/A	26965	#N/A	0.0174	Biognosys standards			FALSE
20221010_MS_zenoSWATH_DC24_VACV_73C_r2.wiff	73C_r2	TPVITGAPYEYR	12	C63H95N15O19	TPVITGAPYEYR	TPVITGAPYEYR	TPVITGAPYEYR	TPVITGAPYEYR	0.9682	#N/A	#N/A	22.92+/-0.01	#N/A	1365.69	2	683.854	#N/A	22.92	1247362	#N/A	1247362	8161	#N/A	8161	#N/A	0.010092	Biognosys standards			FALSE
20221010_MS_zenoSWATH_DC24_VACV_73C_r3.wiff	73C_r3	TPVITGAPYEYR	12	C63H95N15O19	TPVITGAPYEYR	TPVITGAPYEYR	TPVITGAPYEYR	TPVITGAPYEYR	0.966	#N/A	#N/A	22.92+/-0.01	#N/A	1365.69	2	683.854	#N/A	22.92	3006558	#N/A	3006558	15343	#N/A	15343	#N/A	0.011118	Biognosys standards			FALSE
20221010_MS_zenoSWATH_DC24_VACV_37C_r1.wiff	37C_r1	DGLDAASYYAPVR	13	C62H92N16O21	DGLDAASYYAPVR	DGLDAASYYAPVR	DGLDAASYYAPVR	DGLDAASYYAPVR	0.9869	#N/A	#N/A	25.71+/-0.01	0.0003	1396.66	2	699.338	#N/A	25.71	3166887	#N/A	3166887	44466	#N/A	44466	#N/A	0.003364	Biognosys standards			FALSE
20221010_MS_zenoSWATH_DC24_VACV_37C_r2.wiff	37C_r2	DGLDAASYYAPVR	13	C62H92N16O21	DGLDAASYYAPVR	DGLDAASYYAPVR	DGLDAASYYAPVR	DGLDAASYYAPVR	0.9856	#N/A	#N/A	25.71+/-0.01	0.0003	1396.66	2	699.338	#N/A	25.71	2114809	#N/A	2114809	14437	#N/A	14437	#N/A	0.00332	Biognosys standards			FALSE
20221010_MS_zenoSWATH_DC24_VACV_37C_r3.wiff	37C_r3	DGLDAASYYAPVR	13	C62H92N16O21	DGLDAASYYAPVR	DGLDAASYYAPVR	DGLDAASYYAPVR	DGLDAASYYAPVR	0.9826	#N/A	#N/A	25.71+/-0.01	0.0003	1396.66	2	699.338	#N/A	25.71	2595423	#N/A	2595423	6407	#N/A	6407	#N/A	0.003395	Biognosys standards			FALSE
20221010_MS_zenoSWATH_DC24_VACV_41C_r1.wiff	41C_r1	DGLDAASYYAPVR	13	C62H92N16O21	DGLDAASYYAPVR	DGLDAASYYAPVR	DGLDAASYYAPVR	DGLDAASYYAPVR	0.9848	#N/A	#N/A	25.71+/-0.01	#N/A	1396.66	2	699.338	#N/A	25.71	3520843	#N/A	3520843	43095	#N/A	43095	#N/A	0.004292	Biognosys standards			FALSE
20221010_MS_zenoSWATH_DC24_VACV_41C_r2.wiff	41C_r2	DGLDAASYYAPVR	13	C62H92N16O21	DGLDAASYYAPVR	DGLDAASYYAPVR	DGLDAASYYAPVR	DGLDAASYYAPVR	0.9862	#N/A	#N/A	25.71+/-0.01	#N/A	1396.66	2	699.338	#N/A	25.71	2131103	#N/A	2131103	20384	#N/A	20384	#N/A	0.003055	Biognosys standards			FALSE
20221010_MS_zenoSWATH_DC24_VACV_41C_r3.wiff	41C_r3	DGLDAASYYAPVR	13	C62H92N16O21	DGLDAASYYAPVR	DGLDAASYYAPVR	DGLDAASYYAPVR	DGLDAASYYAPVR	0.9819	#N/A	#N/A	25.71+/-0.01	#N/A	1396.66	2	699.338	#N/A	25.71	2420677	#N/A	2420677	29710	#N/A	29710	#N/A	0.003417	Biognosys standards			FALSE
20221010_MS_zenoSWATH_DC24_VACV_45C_r1.wiff	45C_r1	DGLDAASYYAPVR	13	C62H92N16O21	DGLDAASYYAPVR	DGLDAASYYAPVR	DGLDAASYYAPVR	DGLDAASYYAPVR	0.9824	#N/A	#N/A	25.71+/-0.01	#N/A	1396.66	2	699.338	#N/A	25.71	3367676	#N/A	3367676	34734	#N/A	34734	#N/A	0.003683	Biognosys standards			FALSE
20221010_MS_zenoSWATH_DC24_VACV_45C_r2.wiff	45C_r2	DGLDAASYYAPVR	13	C62H92N16O21	DGLDAASYYAPVR	DGLDAASYYAPVR	DGLDAASYYAPVR	DGLDAASYYAPVR	0.9887	#N/A	#N/A	25.71+/-0.01	#N/A	1396.66	2	699.338	#N/A	25.71	2013788	#N/A	2013788	14925	#N/A	14925	#N/A	0.003495	Biognosys standards			FALSE
20221010_MS_zenoSWATH_DC24_VACV_45C_r3.wiff	45C_r3	DGLDAASYYAPVR	13	C62H92N16O21	DGLDAASYYAPVR	DGLDAASYYAPVR	DGLDAASYYAPVR	DGLDAASYYAPVR	0.9822	#N/A	#N/A	25.71+/-0.01	#N/A	1396.66	2	699.338	#N/A	25.71	2897724	#N/A	2897724	32308	#N/A	32308	#N/A	0.003341	Biognosys standards			FALSE
20221010_MS_zenoSWATH_DC24_VACV_49C_r1.wiff	49C_r1	DGLDAASYYAPVR	13	C62H92N16O21	DGLDAASYYAPVR	DGLDAASYYAPVR	DGLDAASYYAPVR	DGLDAASYYAPVR	0.9836	#N/A	#N/A	25.71+/-0.01	#N/A	1396.66	2	699.338	#N/A	25.71	2302108	#N/A	2302108	21083	#N/A	21083	#N/A	0.004843	Biognosys standards			FALSE
20221010_MS_zenoSWATH_DC24_VACV_49C_r2.wiff	49C_r2	DGLDAASYYAPVR	13	C62H92N16O21	DGLDAASYYAPVR	DGLDAASYYAPVR	DGLDAASYYAPVR	DGLDAASYYAPVR	0.9854	#N/A	#N/A	25.71+/-0.01	#N/A	1396.66	2	699.338	#N/A	25.71	2532637	#N/A	2532637	29072	#N/A	29072	#N/A	0.004081	Biognosys standards			FALSE
20221010_MS_zenoSWATH_DC24_VACV_49C_r3.wiff	49C_r3	DGLDAASYYAPVR	13	C62H92N16O21	DGLDAASYYAPVR	DGLDAASYYAPVR	DGLDAASYYAPVR	DGLDAASYYAPVR	0.9864	#N/A	#N/A	25.71+/-0.01	#N/A	1396.66	2	699.338	#N/A	25.71	1884096	#N/A	1884096	22191	#N/A	22191	#N/A	0.004267	Biognosys standards			FALSE
20221010_MS_zenoSWATH_DC24_VACV_53C_r1.wiff	53C_r1	DGLDAASYYAPVR	13	C62H92N16O21	DGLDAASYYAPVR	DGLDAASYYAPVR	DGLDAASYYAPVR	DGLDAASYYAPVR	0.9833	#N/A	#N/A	25.71+/-0.01	#N/A	1396.66	2	699.338	#N/A	25.71	2551245	#N/A	2551245	30818	#N/A	30818	#N/A	0.004804	Biognosys standards			FALSE
20221010_MS_zenoSWATH_DC24_VACV_53C_r2.wiff	53C_r2	DGLDAASYYAPVR	13	C62H92N16O21	DGLDAASYYAPVR	DGLDAASYYAPVR	DGLDAASYYAPVR	DGLDAASYYAPVR	0.9839	#N/A	#N/A	25.71+/-0.01	#N/A	1396.66	2	699.338	#N/A	25.71	2344983	#N/A	2344983	39501	#N/A	39501	#N/A	0.005627	Biognosys standards			FALSE
20221010_MS_zenoSWATH_DC24_VACV_53C_r3.wiff	53C_r3	DGLDAASYYAPVR	13	C62H92N16O21	DGLDAASYYAPVR	DGLDAASYYAPVR	DGLDAASYYAPVR	DGLDAASYYAPVR	0.9919	#N/A	#N/A	25.71+/-0.01	#N/A	1396.66	2	699.338	#N/A	25.71	1504761	#N/A	1504761	15994	#N/A	15994	#N/A	0.005147	Biognosys standards			FALSE
20221010_MS_zenoSWATH_DC24_VACV_57C_r1.wiff	57C_r1	DGLDAASYYAPVR	13	C62H92N16O21	DGLDAASYYAPVR	DGLDAASYYAPVR	DGLDAASYYAPVR	DGLDAASYYAPVR	0.9881	#N/A	#N/A	25.71+/-0.01	#N/A	1396.66	2	699.338	#N/A	25.71	1893179	#N/A	1893179	28362	#N/A	28362	#N/A	0.007455	Biognosys standards			FALSE
20221010_MS_zenoSWATH_DC24_VACV_57C_r2.wiff	57C_r2	DGLDAASYYAPVR	13	C62H92N16O21	DGLDAASYYAPVR	DGLDAASYYAPVR	DGLDAASYYAPVR	DGLDAASYYAPVR	0.9909	#N/A	#N/A	25.71+/-0.01	#N/A	1396.66	2	699.338	#N/A	25.71	1476494	#N/A	1476494	16173	#N/A	16173	#N/A	0.007981	Biognosys standards			FALSE
20221010_MS_zenoSWATH_DC24_VACV_57C_r3.wiff	57C_r3	DGLDAASYYAPVR	13	C62H92N16O21	DGLDAASYYAPVR	DGLDAASYYAPVR	DGLDAASYYAPVR	DGLDAASYYAPVR	0.9868	#N/A	#N/A	25.71+/-0.01	#N/A	1396.66	2	699.338	#N/A	25.71	2062488	#N/A	2062488	18065	#N/A	18065	#N/A	0.008486	Biognosys standards			FALSE
20221010_MS_zenoSWATH_DC24_VACV_61C_r1.wiff	61C_r1	DGLDAASYYAPVR	13	C62H92N16O21	DGLDAASYYAPVR	DGLDAASYYAPVR	DGLDAASYYAPVR	DGLDAASYYAPVR	0.9835	#N/A	#N/A	25.71+/-0.01	#N/A	1396.66	2	699.338	#N/A	25.71	2816017	#N/A	2816017	33054	#N/A	33054	#N/A	0.007127	Biognosys standards			FALSE
20221010_MS_zenoSWATH_DC24_VACV_61C_r2.wiff	61C_r2	DGLDAASYYAPVR	13	C62H92N16O21	DGLDAASYYAPVR	DGLDAASYYAPVR	DGLDAASYYAPVR	DGLDAASYYAPVR	0.9829	#N/A	#N/A	25.71+/-0.01	#N/A	1396.66	2	699.338	#N/A	25.71	2725249	#N/A	2725249	19973	#N/A	19973	#N/A	0.008142	Biognosys standards			FALSE
20221010_MS_zenoSWATH_DC24_VACV_61C_r3.wiff	61C_r3	DGLDAASYYAPVR	13	C62H92N16O21	DGLDAASYYAPVR	DGLDAASYYAPVR	DGLDAASYYAPVR	DGLDAASYYAPVR	0.9843	#N/A	#N/A	25.71+/-0.01	#N/A	1396.66	2	699.338	#N/A	25.71	2043416	#N/A	2043416	24614	#N/A	24614	#N/A	0.006898	Biognosys standards			FALSE
20221010_MS_zenoSWATH_DC24_VACV_65C_r1.wiff	65C_r1	DGLDAASYYAPVR	13	C62H92N16O21	DGLDAASYYAPVR	DGLDAASYYAPVR	DGLDAASYYAPVR	DGLDAASYYAPVR	0.9854	#N/A	#N/A	25.71+/-0.01	#N/A	1396.66	2	699.338	#N/A	25.71	2784266	#N/A	2784266	28201	#N/A	28201	#N/A	0.009091	Biognosys standards			FALSE
20221010_MS_zenoSWATH_DC24_VACV_65C_r2.wiff	65C_r2	DGLDAASYYAPVR	13	C62H92N16O21	DGLDAASYYAPVR	DGLDAASYYAPVR	DGLDAASYYAPVR	DGLDAASYYAPVR	0.98	#N/A	#N/A	25.71+/-0.01	#N/A	1396.66	2	699.338	#N/A	25.71	1662666	#N/A	1662666	17050	#N/A	17050	#N/A	0.011382	Biognosys standards			FALSE
20221010_MS_zenoSWATH_DC24_VACV_65C_r3.wiff	65C_r3	DGLDAASYYAPVR	13	C62H92N16O21	DGLDAASYYAPVR	DGLDAASYYAPVR	DGLDAASYYAPVR	DGLDAASYYAPVR	0.9847	#N/A	#N/A	25.71+/-0.01	#N/A	1396.66	2	699.338	#N/A	25.71	3379702	#N/A	3379702	52069	#N/A	52069	#N/A	0.010574	Biognosys standards			FALSE
20221010_MS_zenoSWATH_DC24_VACV_69C_r1.wiff	69C_r1	DGLDAASYYAPVR	13	C62H92N16O21	DGLDAASYYAPVR	DGLDAASYYAPVR	DGLDAASYYAPVR	DGLDAASYYAPVR	0.9803	#N/A	#N/A	25.71+/-0.01	#N/A	1396.66	2	699.338	#N/A	25.71	2236521	#N/A	2236521	34769	#N/A	34769	#N/A	0.008836	Biognosys standards			FALSE
20221010_MS_zenoSWATH_DC24_VACV_69C_r2.wiff	69C_r2	DGLDAASYYAPVR	13	C62H92N16O21	DGLDAASYYAPVR	DGLDAASYYAPVR	DGLDAASYYAPVR	DGLDAASYYAPVR	0.9898	#N/A	#N/A	25.71+/-0.01	#N/A	1396.66	2	699.338	#N/A	25.71	2491965	#N/A	2491965	28073	#N/A	28073	#N/A	0.009329	Biognosys standards			FALSE
20221010_MS_zenoSWATH_DC24_VACV_69C_r3.wiff	69C_r3	DGLDAASYYAPVR	13	C62H92N16O21	DGLDAASYYAPVR	DGLDAASYYAPVR	DGLDAASYYAPVR	DGLDAASYYAPVR	0.9825	#N/A	#N/A	25.71+/-0.01	#N/A	1396.66	2	699.338	#N/A	25.71	1152270	#N/A	1152270	4113	#N/A	4113	#N/A	0.009958	Biognosys standards			FALSE
20221010_MS_zenoSWATH_DC24_VACV_73C_r1.wiff	73C_r1	DGLDAASYYAPVR	13	C62H92N16O21	DGLDAASYYAPVR	DGLDAASYYAPVR	DGLDAASYYAPVR	DGLDAASYYAPVR	0.9877	#N/A	#N/A	25.71+/-0.01	#N/A	1396.66	2	699.338	#N/A	25.71	1561320	#N/A	1561320	11575	#N/A	11575	#N/A	0.009608	Biognosys standards			FALSE
20221010_MS_zenoSWATH_DC24_VACV_73C_r2.wiff	73C_r2	DGLDAASYYAPVR	13	C62H92N16O21	DGLDAASYYAPVR	DGLDAASYYAPVR	DGLDAASYYAPVR	DGLDAASYYAPVR	0.9861	#N/A	#N/A	25.71+/-0.01	#N/A	1396.66	2	699.338	#N/A	25.71	663817	#N/A	663817	4617	#N/A	4617	#N/A	0.005371	Biognosys standards			FALSE
20221010_MS_zenoSWATH_DC24_VACV_73C_r3.wiff	73C_r3	DGLDAASYYAPVR	13	C62H92N16O21	DGLDAASYYAPVR	DGLDAASYYAPVR	DGLDAASYYAPVR	DGLDAASYYAPVR	0.9841	#N/A	#N/A	25.71+/-0.01	#N/A	1396.66	2	699.338	#N/A	25.71	1641985	#N/A	1641985	14844	#N/A	14844	#N/A	0.006072	Biognosys standards			FALSE
20221010_MS_zenoSWATH_DC24_VACV_37C_r1.wiff	37C_r1	ADVTPADFSEWSK	13	C65H93N15O23	ADVTPADFSEWSK	ADVTPADFSEWSK	ADVTPADFSEWSK	ADVTPADFSEWSK	0.9628	#N/A	#N/A	27.79+/-0.02	0.0107	1451.66	2	726.836	#N/A	27.81	731240	#N/A	731240	8906	#N/A	8906	#N/A	0.000777	Biognosys standards			FALSE
20221010_MS_zenoSWATH_DC24_VACV_37C_r2.wiff	37C_r2	ADVTPADFSEWSK	13	C65H93N15O23	ADVTPADFSEWSK	ADVTPADFSEWSK	ADVTPADFSEWSK	ADVTPADFSEWSK	0.9639	#N/A	#N/A	27.79+/-0.02	0.0004	1451.66	2	726.836	#N/A	27.81	1509446	#N/A	1509446	24842	#N/A	24842	#N/A	0.00237	Biognosys standards			FALSE
20221010_MS_zenoSWATH_DC24_VACV_37C_r3.wiff	37C_r3	ADVTPADFSEWSK	13	C65H93N15O23	ADVTPADFSEWSK	ADVTPADFSEWSK	ADVTPADFSEWSK	ADVTPADFSEWSK	0.9652	#N/A	#N/A	27.79+/-0.02	0.0004	1451.66	2	726.836	#N/A	27.81	793589	#N/A	793589	18014	#N/A	18014	#N/A	0.001038	Biognosys standards			FALSE
20221010_MS_zenoSWATH_DC24_VACV_41C_r1.wiff	41C_r1	ADVTPADFSEWSK	13	C65H93N15O23	ADVTPADFSEWSK	ADVTPADFSEWSK	ADVTPADFSEWSK	ADVTPADFSEWSK	0.9696	#N/A	#N/A	27.79+/-0.02	#N/A	1451.66	2	726.836	#N/A	27.81	2497472	#N/A	2497472	40391	#N/A	40391	#N/A	0.003045	Biognosys standards			FALSE
20221010_MS_zenoSWATH_DC24_VACV_41C_r2.wiff	41C_r2	ADVTPADFSEWSK	13	C65H93N15O23	ADVTPADFSEWSK	ADVTPADFSEWSK	ADVTPADFSEWSK	ADVTPADFSEWSK	0.9645	#N/A	#N/A	27.79+/-0.02	#N/A	1451.66	2	726.836	#N/A	27.81	1252337	#N/A	1252337	7873	#N/A	7873	#N/A	0.001795	Biognosys standards			FALSE
20221010_MS_zenoSWATH_DC24_VACV_41C_r3.wiff	41C_r3	ADVTPADFSEWSK	13	C65H93N15O23	ADVTPADFSEWSK	ADVTPADFSEWSK	ADVTPADFSEWSK	ADVTPADFSEWSK	0.9706	#N/A	#N/A	27.79+/-0.02	#N/A	1451.66	2	726.836	#N/A	27.81	701305	#N/A	701305	2415	#N/A	2415	#N/A	0.00099	Biognosys standards			FALSE
20221010_MS_zenoSWATH_DC24_VACV_45C_r1.wiff	45C_r1	ADVTPADFSEWSK	13	C65H93N15O23	ADVTPADFSEWSK	ADVTPADFSEWSK	ADVTPADFSEWSK	ADVTPADFSEWSK	0.9635	#N/A	#N/A	27.79+/-0.02	#N/A	1451.66	2	726.836	#N/A	27.81	1452498	#N/A	1452498	20499	#N/A	20499	#N/A	0.001589	Biognosys standards			FALSE
20221010_MS_zenoSWATH_DC24_VACV_45C_r2.wiff	45C_r2	ADVTPADFSEWSK	13	C65H93N15O23	ADVTPADFSEWSK	ADVTPADFSEWSK	ADVTPADFSEWSK	ADVTPADFSEWSK	0.9612	#N/A	#N/A	27.79+/-0.02	#N/A	1451.66	2	726.836	#N/A	27.81	1190356	#N/A	1190356	6760	#N/A	6760	#N/A	0.002066	Biognosys standards			FALSE
20221010_MS_zenoSWATH_DC24_VACV_45C_r3.wiff	45C_r3	ADVTPADFSEWSK	13	C65H93N15O23	ADVTPADFSEWSK	ADVTPADFSEWSK	ADVTPADFSEWSK	ADVTPADFSEWSK	0.9634	#N/A	#N/A	27.79+/-0.02	#N/A	1451.66	2	726.836	#N/A	27.81	1022989	#N/A	1022989	745	#N/A	745	#N/A	0.00118	Biognosys standards			FALSE
20221010_MS_zenoSWATH_DC24_VACV_49C_r1.wiff	49C_r1	ADVTPADFSEWSK	13	C65H93N15O23	ADVTPADFSEWSK	ADVTPADFSEWSK	ADVTPADFSEWSK	ADVTPADFSEWSK	0.9635	#N/A	#N/A	27.79+/-0.02	#N/A	1451.66	2	726.836	#N/A	27.81	1157271	#N/A	1157271	12291	#N/A	12291	#N/A	0.002435	Biognosys standards			FALSE
20221010_MS_zenoSWATH_DC24_VACV_49C_r2.wiff	49C_r2	ADVTPADFSEWSK	13	C65H93N15O23	ADVTPADFSEWSK	ADVTPADFSEWSK	ADVTPADFSEWSK	ADVTPADFSEWSK	0.9725	#N/A	#N/A	27.79+/-0.02	#N/A	1451.66	2	726.836	#N/A	27.81	941310	#N/A	941310	4692	#N/A	4692	#N/A	0.001517	Biognosys standards			FALSE
20221010_MS_zenoSWATH_DC24_VACV_49C_r3.wiff	49C_r3	ADVTPADFSEWSK	13	C65H93N15O23	ADVTPADFSEWSK	ADVTPADFSEWSK	ADVTPADFSEWSK	ADVTPADFSEWSK	0.9571	#N/A	#N/A	27.79+/-0.02	#N/A	1451.66	2	726.836	#N/A	27.81	1007246	#N/A	1007246	6784	#N/A	6784	#N/A	0.002281	Biognosys standards			FALSE
20221010_MS_zenoSWATH_DC24_VACV_53C_r1.wiff	53C_r1	ADVTPADFSEWSK	13	C65H93N15O23	ADVTPADFSEWSK	ADVTPADFSEWSK	ADVTPADFSEWSK	ADVTPADFSEWSK	0.9562	#N/A	#N/A	27.79+/-0.02	#N/A	1451.66	2	726.836	#N/A	27.81	1375215	#N/A	1375215	14337	#N/A	14337	#N/A	0.002589	Biognosys standards			FALSE
20221010_MS_zenoSWATH_DC24_VACV_53C_r2.wiff	53C_r2	ADVTPADFSEWSK	13	C65H93N15O23	ADVTPADFSEWSK	ADVTPADFSEWSK	ADVTPADFSEWSK	ADVTPADFSEWSK	0.9641	#N/A	#N/A	27.79+/-0.02	#N/A	1451.66	2	726.836	#N/A	27.81	1109310	#N/A	1109310	12555	#N/A	12555	#N/A	0.002662	Biognosys standards			FALSE
20221010_MS_zenoSWATH_DC24_VACV_53C_r3.wiff	53C_r3	ADVTPADFSEWSK	13	C65H93N15O23	ADVTPADFSEWSK	ADVTPADFSEWSK	ADVTPADFSEWSK	ADVTPADFSEWSK	0.9713	#N/A	#N/A	27.79+/-0.02	#N/A	1451.66	2	726.836	#N/A	27.81	667025	#N/A	667025	3663	#N/A	3663	#N/A	0.002281	Biognosys standards			FALSE
20221010_MS_zenoSWATH_DC24_VACV_57C_r1.wiff	57C_r1	ADVTPADFSEWSK	13	C65H93N15O23	ADVTPADFSEWSK	ADVTPADFSEWSK	ADVTPADFSEWSK	ADVTPADFSEWSK	0.9651	#N/A	#N/A	27.79+/-0.02	#N/A	1451.66	2	726.836	#N/A	27.81	1716481	#N/A	1716481	11385	#N/A	11385	#N/A	0.00676	Biognosys standards			FALSE
20221010_MS_zenoSWATH_DC24_VACV_57C_r2.wiff	57C_r2	ADVTPADFSEWSK	13	C65H93N15O23	ADVTPADFSEWSK	ADVTPADFSEWSK	ADVTPADFSEWSK	ADVTPADFSEWSK	0.9628	#N/A	#N/A	27.79+/-0.02	#N/A	1451.66	2	726.836	#N/A	27.81	551662	#N/A	551662	4736	#N/A	4736	#N/A	0.002982	Biognosys standards			FALSE
20221010_MS_zenoSWATH_DC24_VACV_57C_r3.wiff	57C_r3	ADVTPADFSEWSK	13	C65H93N15O23	ADVTPADFSEWSK	ADVTPADFSEWSK	ADVTPADFSEWSK	ADVTPADFSEWSK	0.9679	#N/A	#N/A	27.79+/-0.02	#N/A	1451.66	2	726.836	#N/A	27.81	1185054	#N/A	1185054	16060	#N/A	16060	#N/A	0.004876	Biognosys standards			FALSE
20221010_MS_zenoSWATH_DC24_VACV_61C_r1.wiff	61C_r1	ADVTPADFSEWSK	13	C65H93N15O23	ADVTPADFSEWSK	ADVTPADFSEWSK	ADVTPADFSEWSK	ADVTPADFSEWSK	0.9685	#N/A	#N/A	27.79+/-0.02	#N/A	1451.66	2	726.836	#N/A	27.81	2087003	#N/A	2087003	36943	#N/A	36943	#N/A	0.005282	Biognosys standards			FALSE
20221010_MS_zenoSWATH_DC24_VACV_61C_r2.wiff	61C_r2	ADVTPADFSEWSK	13	C65H93N15O23	ADVTPADFSEWSK	ADVTPADFSEWSK	ADVTPADFSEWSK	ADVTPADFSEWSK	0.9636	#N/A	#N/A	27.79+/-0.02	#N/A	1451.66	2	726.836	#N/A	27.81	1258241	#N/A	1258241	20091	#N/A	20091	#N/A	0.003759	Biognosys standards			FALSE
20221010_MS_zenoSWATH_DC24_VACV_61C_r3.wiff	61C_r3	ADVTPADFSEWSK	13	C65H93N15O23	ADVTPADFSEWSK	ADVTPADFSEWSK	ADVTPADFSEWSK	ADVTPADFSEWSK	0.9707	#N/A	#N/A	27.79+/-0.02	#N/A	1451.66	2	726.836	#N/A	27.81	1829071	#N/A	1829071	20379	#N/A	20379	#N/A	0.006175	Biognosys standards			FALSE
20221010_MS_zenoSWATH_DC24_VACV_65C_r1.wiff	65C_r1	ADVTPADFSEWSK	13	C65H93N15O23	ADVTPADFSEWSK	ADVTPADFSEWSK	ADVTPADFSEWSK	ADVTPADFSEWSK	0.9631	#N/A	#N/A	27.79+/-0.02	#N/A	1451.66	2	726.836	#N/A	27.81	2001241	#N/A	2001241	7916	#N/A	7916	#N/A	0.006535	Biognosys standards			FALSE
20221010_MS_zenoSWATH_DC24_VACV_65C_r2.wiff	65C_r2	ADVTPADFSEWSK	13	C65H93N15O23	ADVTPADFSEWSK	ADVTPADFSEWSK	ADVTPADFSEWSK	ADVTPADFSEWSK	0.9652	#N/A	#N/A	27.79+/-0.02	#N/A	1451.66	2	726.836	#N/A	27.81	1262708	#N/A	1262708	13276	#N/A	13276	#N/A	0.008644	Biognosys standards			FALSE
20221010_MS_zenoSWATH_DC24_VACV_65C_r3.wiff	65C_r3	ADVTPADFSEWSK	13	C65H93N15O23	ADVTPADFSEWSK	ADVTPADFSEWSK	ADVTPADFSEWSK	ADVTPADFSEWSK	0.9661	#N/A	#N/A	27.79+/-0.02	#N/A	1451.66	2	726.836	#N/A	27.81	2480034	#N/A	2480034	53090	#N/A	53090	#N/A	0.007759	Biognosys standards			FALSE
20221010_MS_zenoSWATH_DC24_VACV_69C_r1.wiff	69C_r1	ADVTPADFSEWSK	13	C65H93N15O23	ADVTPADFSEWSK	ADVTPADFSEWSK	ADVTPADFSEWSK	ADVTPADFSEWSK	0.9642	#N/A	#N/A	27.79+/-0.02	#N/A	1451.66	2	726.836	#N/A	27.81	2049048	#N/A	2049048	31709	#N/A	31709	#N/A	0.008095	Biognosys standards			FALSE
20221010_MS_zenoSWATH_DC24_VACV_69C_r2.wiff	69C_r2	ADVTPADFSEWSK	13	C65H93N15O23	ADVTPADFSEWSK	ADVTPADFSEWSK	ADVTPADFSEWSK	ADVTPADFSEWSK	0.9658	#N/A	#N/A	27.79+/-0.02	#N/A	1451.66	2	726.836	#N/A	27.81	1927837	#N/A	1927837	20769	#N/A	20769	#N/A	0.007217	Biognosys standards			FALSE
20221010_MS_zenoSWATH_DC24_VACV_69C_r3.wiff	69C_r3	ADVTPADFSEWSK	13	C65H93N15O23	ADVTPADFSEWSK	ADVTPADFSEWSK	ADVTPADFSEWSK	ADVTPADFSEWSK	0.9625	#N/A	#N/A	27.79+/-0.02	#N/A	1451.66	2	726.836	#N/A	27.81	683433	#N/A	683433	4035	#N/A	4035	#N/A	0.005906	Biognosys standards			FALSE
20221010_MS_zenoSWATH_DC24_VACV_73C_r1.wiff	73C_r1	ADVTPADFSEWSK	13	C65H93N15O23	ADVTPADFSEWSK	ADVTPADFSEWSK	ADVTPADFSEWSK	ADVTPADFSEWSK	0.9624	#N/A	#N/A	27.79+/-0.02	#N/A	1451.66	2	726.836	#N/A	27.81	1211651	#N/A	1211651	8847	#N/A	8847	#N/A	0.007457	Biognosys standards			FALSE
20221010_MS_zenoSWATH_DC24_VACV_73C_r2.wiff	73C_r2	ADVTPADFSEWSK	13	C65H93N15O23	ADVTPADFSEWSK	ADVTPADFSEWSK	ADVTPADFSEWSK	ADVTPADFSEWSK	0.9695	#N/A	#N/A	27.79+/-0.02	#N/A	1451.66	2	726.836	#N/A	27.81	583790	#N/A	583790	3191	#N/A	3191	#N/A	0.004723	Biognosys standards			FALSE
20221010_MS_zenoSWATH_DC24_VACV_73C_r3.wiff	73C_r3	ADVTPADFSEWSK	13	C65H93N15O23	ADVTPADFSEWSK	ADVTPADFSEWSK	ADVTPADFSEWSK	ADVTPADFSEWSK	0.9637	#N/A	#N/A	27.79+/-0.02	#N/A	1451.66	2	726.836	#N/A	27.81	1463628	#N/A	1463628	19962	#N/A	19962	#N/A	0.005412	Biognosys standards			FALSE
20221010_MS_zenoSWATH_DC24_VACV_37C_r1.wiff	37C_r1	GTFIIDPGGVIR	12	C57H93N15O16	GTFIIDPGGVIR	GTFIIDPGGVIR	GTFIIDPGGVIR	GTFIIDPGGVIR	0.9821	#N/A	#N/A	32.54+/-0.02	0.0003	1243.69	2	622.854	#N/A	32.53	7463868	#N/A	7463868	42958	#N/A	42958	#N/A	0.007929	Biognosys standards			FALSE
20221010_MS_zenoSWATH_DC24_VACV_37C_r2.wiff	37C_r2	GTFIIDPGGVIR	12	C57H93N15O16	GTFIIDPGGVIR	GTFIIDPGGVIR	GTFIIDPGGVIR	GTFIIDPGGVIR	0.9744	#N/A	#N/A	32.54+/-0.02	0.0003	1243.69	2	622.854	#N/A	32.53	5625726	#N/A	5625726	73899	#N/A	73899	#N/A	0.008833	Biognosys standards			FALSE
20221010_MS_zenoSWATH_DC24_VACV_37C_r3.wiff	37C_r3	GTFIIDPGGVIR	12	C57H93N15O16	GTFIIDPGGVIR	GTFIIDPGGVIR	GTFIIDPGGVIR	GTFIIDPGGVIR	0.9775	#N/A	#N/A	32.54+/-0.02	0.0003	1243.69	2	622.854	#N/A	32.53	6999126	#N/A	6999126	51126	#N/A	51126	#N/A	0.009156	Biognosys standards			FALSE
20221010_MS_zenoSWATH_DC24_VACV_41C_r1.wiff	41C_r1	GTFIIDPGGVIR	12	C57H93N15O16	GTFIIDPGGVIR	GTFIIDPGGVIR	GTFIIDPGGVIR	GTFIIDPGGVIR	0.9831	#N/A	#N/A	32.54+/-0.02	#N/A	1243.69	2	622.854	#N/A	32.53	7888028	#N/A	7888028	31382	#N/A	31382	#N/A	0.009616	Biognosys standards			FALSE
20221010_MS_zenoSWATH_DC24_VACV_41C_r2.wiff	41C_r2	GTFIIDPGGVIR	12	C57H93N15O16	GTFIIDPGGVIR	GTFIIDPGGVIR	GTFIIDPGGVIR	GTFIIDPGGVIR	0.9744	#N/A	#N/A	32.54+/-0.02	#N/A	1243.69	2	622.854	#N/A	32.53	5703079	#N/A	5703079	28161	#N/A	28161	#N/A	0.008177	Biognosys standards			FALSE
20221010_MS_zenoSWATH_DC24_VACV_41C_r3.wiff	41C_r3	GTFIIDPGGVIR	12	C57H93N15O16	GTFIIDPGGVIR	GTFIIDPGGVIR	GTFIIDPGGVIR	GTFIIDPGGVIR	0.9715	#N/A	#N/A	32.54+/-0.02	#N/A	1243.69	2	622.854	#N/A	32.53	5688122	#N/A	5688122	30342	#N/A	30342	#N/A	0.008029	Biognosys standards			FALSE
20221010_MS_zenoSWATH_DC24_VACV_45C_r1.wiff	45C_r1	GTFIIDPGGVIR	12	C57H93N15O16	GTFIIDPGGVIR	GTFIIDPGGVIR	GTFIIDPGGVIR	GTFIIDPGGVIR	0.9829	#N/A	#N/A	32.54+/-0.02	#N/A	1243.69	2	622.854	#N/A	32.53	8183020	#N/A	8183020	79422	#N/A	79422	#N/A	0.00895	Biognosys standards			FALSE
20221010_MS_zenoSWATH_DC24_VACV_45C_r2.wiff	45C_r2	GTFIIDPGGVIR	12	C57H93N15O16	GTFIIDPGGVIR	GTFIIDPGGVIR	GTFIIDPGGVIR	GTFIIDPGGVIR	0.9725	#N/A	#N/A	32.54+/-0.02	#N/A	1243.69	2	622.854	#N/A	32.53	5253833	#N/A	5253833	39083	#N/A	39083	#N/A	0.009118	Biognosys standards			FALSE
20221010_MS_zenoSWATH_DC24_VACV_45C_r3.wiff	45C_r3	GTFIIDPGGVIR	12	C57H93N15O16	GTFIIDPGGVIR	GTFIIDPGGVIR	GTFIIDPGGVIR	GTFIIDPGGVIR	0.981	#N/A	#N/A	32.54+/-0.02	#N/A	1243.69	2	622.854	#N/A	32.53	7430959	#N/A	7430959	79741	#N/A	79741	#N/A	0.008569	Biognosys standards			FALSE
20221010_MS_zenoSWATH_DC24_VACV_49C_r1.wiff	49C_r1	GTFIIDPGGVIR	12	C57H93N15O16	GTFIIDPGGVIR	GTFIIDPGGVIR	GTFIIDPGGVIR	GTFIIDPGGVIR	0.9777	#N/A	#N/A	32.54+/-0.02	#N/A	1243.69	2	622.854	#N/A	32.53	5723044	#N/A	5723044	50103	#N/A	50103	#N/A	0.01204	Biognosys standards			FALSE
20221010_MS_zenoSWATH_DC24_VACV_49C_r2.wiff	49C_r2	GTFIIDPGGVIR	12	C57H93N15O16	GTFIIDPGGVIR	GTFIIDPGGVIR	GTFIIDPGGVIR	GTFIIDPGGVIR	0.9764	#N/A	#N/A	32.54+/-0.02	#N/A	1243.69	2	622.854	#N/A	32.53	6311674	#N/A	6311674	34433	#N/A	34433	#N/A	0.010169	Biognosys standards			FALSE
20221010_MS_zenoSWATH_DC24_VACV_49C_r3.wiff	49C_r3	GTFIIDPGGVIR	12	C57H93N15O16	GTFIIDPGGVIR	GTFIIDPGGVIR	GTFIIDPGGVIR	GTFIIDPGGVIR	0.9689	#N/A	#N/A	32.54+/-0.02	#N/A	1243.69	2	622.854	#N/A	32.53	4937706	#N/A	4937706	31757	#N/A	31757	#N/A	0.011183	Biognosys standards			FALSE
20221010_MS_zenoSWATH_DC24_VACV_53C_r1.wiff	53C_r1	GTFIIDPGGVIR	12	C57H93N15O16	GTFIIDPGGVIR	GTFIIDPGGVIR	GTFIIDPGGVIR	GTFIIDPGGVIR	0.9764	#N/A	#N/A	32.54+/-0.02	#N/A	1243.69	2	622.854	#N/A	32.53	6774727	#N/A	6774727	39942	#N/A	39942	#N/A	0.012756	Biognosys standards			FALSE
20221010_MS_zenoSWATH_DC24_VACV_53C_r2.wiff	53C_r2	GTFIIDPGGVIR	12	C57H93N15O16	GTFIIDPGGVIR	GTFIIDPGGVIR	GTFIIDPGGVIR	GTFIIDPGGVIR	0.9739	#N/A	#N/A	32.54+/-0.02	#N/A	1243.69	2	622.854	#N/A	32.53	5563979	#N/A	5563979	81396	#N/A	81396	#N/A	0.013351	Biognosys standards			FALSE
20221010_MS_zenoSWATH_DC24_VACV_53C_r3.wiff	53C_r3	GTFIIDPGGVIR	12	C57H93N15O16	GTFIIDPGGVIR	GTFIIDPGGVIR	GTFIIDPGGVIR	GTFIIDPGGVIR	0.9672	#N/A	#N/A	32.54+/-0.02	#N/A	1243.69	2	622.854	#N/A	32.53	4218098	#N/A	4218098	23726	#N/A	23726	#N/A	0.014427	Biognosys standards			FALSE
20221010_MS_zenoSWATH_DC24_VACV_57C_r1.wiff	57C_r1	GTFIIDPGGVIR	12	C57H93N15O16	GTFIIDPGGVIR	GTFIIDPGGVIR	GTFIIDPGGVIR	GTFIIDPGGVIR	0.9742	#N/A	#N/A	32.54+/-0.02	#N/A	1243.69	2	622.854	#N/A	32.53	5355119	#N/A	5355119	34490	#N/A	34490	#N/A	0.021088	Biognosys standards			FALSE
20221010_MS_zenoSWATH_DC24_VACV_57C_r2.wiff	57C_r2	GTFIIDPGGVIR	12	C57H93N15O16	GTFIIDPGGVIR	GTFIIDPGGVIR	GTFIIDPGGVIR	GTFIIDPGGVIR	0.9654	#N/A	#N/A	32.54+/-0.02	#N/A	1243.69	2	622.854	#N/A	32.53	4060795	#N/A	4060795	36794	#N/A	36794	#N/A	0.021951	Biognosys standards			FALSE
20221010_MS_zenoSWATH_DC24_VACV_57C_r3.wiff	57C_r3	GTFIIDPGGVIR	12	C57H93N15O16	GTFIIDPGGVIR	GTFIIDPGGVIR	GTFIIDPGGVIR	GTFIIDPGGVIR	0.9705	#N/A	#N/A	32.54+/-0.02	#N/A	1243.69	2	622.854	#N/A	32.53	5474295	#N/A	5474295	34492	#N/A	34492	#N/A	0.022524	Biognosys standards			FALSE
20221010_MS_zenoSWATH_DC24_VACV_61C_r1.wiff	61C_r1	GTFIIDPGGVIR	12	C57H93N15O16	GTFIIDPGGVIR	GTFIIDPGGVIR	GTFIIDPGGVIR	GTFIIDPGGVIR	0.9815	#N/A	#N/A	32.54+/-0.02	#N/A	1243.69	2	622.854	#N/A	32.53	6900404	#N/A	6900404	19819	#N/A	19819	#N/A	0.017463	Biognosys standards			FALSE
20221010_MS_zenoSWATH_DC24_VACV_61C_r2.wiff	61C_r2	GTFIIDPGGVIR	12	C57H93N15O16	GTFIIDPGGVIR	GTFIIDPGGVIR	GTFIIDPGGVIR	GTFIIDPGGVIR	0.9777	#N/A	#N/A	32.54+/-0.02	#N/A	1243.69	2	622.854	#N/A	32.53	6973998	#N/A	6973998	28538	#N/A	28538	#N/A	0.020835	Biognosys standards			FALSE
20221010_MS_zenoSWATH_DC24_VACV_61C_r3.wiff	61C_r3	GTFIIDPGGVIR	12	C57H93N15O16	GTFIIDPGGVIR	GTFIIDPGGVIR	GTFIIDPGGVIR	GTFIIDPGGVIR	0.9697	#N/A	#N/A	32.54+/-0.02	#N/A	1243.69	2	622.854	#N/A	32.53	5645422	#N/A	5645422	48912	#N/A	48912	#N/A	0.019059	Biognosys standards			FALSE
20221010_MS_zenoSWATH_DC24_VACV_65C_r1.wiff	65C_r1	GTFIIDPGGVIR	12	C57H93N15O16	GTFIIDPGGVIR	GTFIIDPGGVIR	GTFIIDPGGVIR	GTFIIDPGGVIR	0.9773	#N/A	#N/A	32.54+/-0.02	#N/A	1243.69	2	622.854	#N/A	32.53	6633976	#N/A	6633976	48425	#N/A	48425	#N/A	0.021661	Biognosys standards			FALSE
20221010_MS_zenoSWATH_DC24_VACV_65C_r2.wiff	65C_r2	GTFIIDPGGVIR	12	C57H93N15O16	GTFIIDPGGVIR	GTFIIDPGGVIR	GTFIIDPGGVIR	GTFIIDPGGVIR	0.969	#N/A	#N/A	32.54+/-0.02	#N/A	1243.69	2	622.854	#N/A	32.53	4334241	#N/A	4334241	55376	#N/A	55376	#N/A	0.02967	Biognosys standards			FALSE
20221010_MS_zenoSWATH_DC24_VACV_65C_r3.wiff	65C_r3	GTFIIDPGGVIR	12	C57H93N15O16	GTFIIDPGGVIR	GTFIIDPGGVIR	GTFIIDPGGVIR	GTFIIDPGGVIR	0.9806	#N/A	#N/A	32.54+/-0.02	#N/A	1243.69	2	622.854	#N/A	32.53	8081750	#N/A	8081750	102039	#N/A	102039	#N/A	0.025285	Biognosys standards			FALSE
20221010_MS_zenoSWATH_DC24_VACV_69C_r1.wiff	69C_r1	GTFIIDPGGVIR	12	C57H93N15O16	GTFIIDPGGVIR	GTFIIDPGGVIR	GTFIIDPGGVIR	GTFIIDPGGVIR	0.9764	#N/A	#N/A	32.54+/-0.02	#N/A	1243.69	2	622.854	#N/A	32.53	5953575	#N/A	5953575	14410	#N/A	14410	#N/A	0.02352	Biognosys standards			FALSE
20221010_MS_zenoSWATH_DC24_VACV_69C_r2.wiff	69C_r2	GTFIIDPGGVIR	12	C57H93N15O16	GTFIIDPGGVIR	GTFIIDPGGVIR	GTFIIDPGGVIR	GTFIIDPGGVIR	0.9765	#N/A	#N/A	32.54+/-0.02	#N/A	1243.69	2	622.854	#N/A	32.53	6632411	#N/A	6632411	43474	#N/A	43474	#N/A	0.024829	Biognosys standards			FALSE
20221010_MS_zenoSWATH_DC24_VACV_69C_r3.wiff	69C_r3	GTFIIDPGGVIR	12	C57H93N15O16	GTFIIDPGGVIR	GTFIIDPGGVIR	GTFIIDPGGVIR	GTFIIDPGGVIR	0.9637	#N/A	#N/A	32.54+/-0.02	#N/A	1243.69	2	622.854	#N/A	32.53	3218924	#N/A	3218924	32917	#N/A	32917	#N/A	0.027818	Biognosys standards			FALSE
20221010_MS_zenoSWATH_DC24_VACV_73C_r1.wiff	73C_r1	GTFIIDPGGVIR	12	C57H93N15O16	GTFIIDPGGVIR	GTFIIDPGGVIR	GTFIIDPGGVIR	GTFIIDPGGVIR	0.9711	#N/A	#N/A	32.54+/-0.02	#N/A	1243.69	2	622.854	#N/A	32.53	4196665	#N/A	4196665	37788	#N/A	37788	#N/A	0.025826	Biognosys standards			FALSE
20221010_MS_zenoSWATH_DC24_VACV_73C_r2.wiff	73C_r2	GTFIIDPGGVIR	12	C57H93N15O16	GTFIIDPGGVIR	GTFIIDPGGVIR	GTFIIDPGGVIR	GTFIIDPGGVIR	0.9613	#N/A	#N/A	32.54+/-0.02	#N/A	1243.69	2	622.854	#N/A	32.53	1782029	#N/A	1782029	19352	#N/A	19352	#N/A	0.014418	Biognosys standards			FALSE
20221010_MS_zenoSWATH_DC24_VACV_73C_r3.wiff	73C_r3	GTFIIDPGGVIR	12	C57H93N15O16	GTFIIDPGGVIR	GTFIIDPGGVIR	GTFIIDPGGVIR	GTFIIDPGGVIR	0.9629	#N/A	#N/A	32.54+/-0.02	#N/A	1243.69	2	622.854	#N/A	32.53	4298419	#N/A	4298419	69989	#N/A	69989	#N/A	0.015895	Biognosys standards			FALSE
20221010_MS_zenoSWATH_DC24_VACV_37C_r1.wiff	37C_r1	GTFIIDPAAVIR	12	C59H97N15O16	GTFIIDPAAVIR	GTFIIDPAAVIR	GTFIIDPAAVIR	GTFIIDPAAVIR	0.9801	#N/A	#N/A	36.43+/-0.02	0.0003	1271.72	2	636.869	#N/A	36.44	6859186	#N/A	6859186	41944	#N/A	41944	#N/A	0.007287	Biognosys standards			FALSE
20221010_MS_zenoSWATH_DC24_VACV_37C_r2.wiff	37C_r2	GTFIIDPAAVIR	12	C59H97N15O16	GTFIIDPAAVIR	GTFIIDPAAVIR	GTFIIDPAAVIR	GTFIIDPAAVIR	0.9781	#N/A	#N/A	36.43+/-0.02	0.0003	1271.72	2	636.869	#N/A	36.44	4974856	#N/A	4974856	49557	#N/A	49557	#N/A	0.007811	Biognosys standards			FALSE
20221010_MS_zenoSWATH_DC24_VACV_37C_r3.wiff	37C_r3	GTFIIDPAAVIR	12	C59H97N15O16	GTFIIDPAAVIR	GTFIIDPAAVIR	GTFIIDPAAVIR	GTFIIDPAAVIR	0.9778	#N/A	#N/A	36.43+/-0.02	0.0003	1271.72	2	636.869	#N/A	36.44	6459119	#N/A	6459119	48124	#N/A	48124	#N/A	0.008449	Biognosys standards			FALSE
20221010_MS_zenoSWATH_DC24_VACV_41C_r1.wiff	41C_r1	GTFIIDPAAVIR	12	C59H97N15O16	GTFIIDPAAVIR	GTFIIDPAAVIR	GTFIIDPAAVIR	GTFIIDPAAVIR	0.9811	#N/A	#N/A	36.43+/-0.02	#N/A	1271.72	2	636.869	#N/A	36.44	7045052	#N/A	7045052	67130	#N/A	67130	#N/A	0.008589	Biognosys standards			FALSE
20221010_MS_zenoSWATH_DC24_VACV_41C_r2.wiff	41C_r2	GTFIIDPAAVIR	12	C59H97N15O16	GTFIIDPAAVIR	GTFIIDPAAVIR	GTFIIDPAAVIR	GTFIIDPAAVIR	0.9814	#N/A	#N/A	36.43+/-0.02	#N/A	1271.72	2	636.869	#N/A	36.44	5062631	#N/A	5062631	47862	#N/A	47862	#N/A	0.007258	Biognosys standards			FALSE
20221010_MS_zenoSWATH_DC24_VACV_41C_r3.wiff	41C_r3	GTFIIDPAAVIR	12	C59H97N15O16	GTFIIDPAAVIR	GTFIIDPAAVIR	GTFIIDPAAVIR	GTFIIDPAAVIR	0.9807	#N/A	#N/A	36.43+/-0.02	#N/A	1271.72	2	636.869	#N/A	36.44	5439967	#N/A	5439967	35186	#N/A	35186	#N/A	0.007679	Biognosys standards			FALSE
20221010_MS_zenoSWATH_DC24_VACV_45C_r1.wiff	45C_r1	GTFIIDPAAVIR	12	C59H97N15O16	GTFIIDPAAVIR	GTFIIDPAAVIR	GTFIIDPAAVIR	GTFIIDPAAVIR	0.9796	#N/A	#N/A	36.43+/-0.02	#N/A	1271.72	2	636.869	#N/A	36.44	7480163	#N/A	7480163	50454	#N/A	50454	#N/A	0.008181	Biognosys standards			FALSE
20221010_MS_zenoSWATH_DC24_VACV_45C_r2.wiff	45C_r2	GTFIIDPAAVIR	12	C59H97N15O16	GTFIIDPAAVIR	GTFIIDPAAVIR	GTFIIDPAAVIR	GTFIIDPAAVIR	0.9783	#N/A	#N/A	36.43+/-0.02	#N/A	1271.72	2	636.869	#N/A	36.44	4581098	#N/A	4581098	36300	#N/A	36300	#N/A	0.00795	Biognosys standards			FALSE
20221010_MS_zenoSWATH_DC24_VACV_45C_r3.wiff	45C_r3	GTFIIDPAAVIR	12	C59H97N15O16	GTFIIDPAAVIR	GTFIIDPAAVIR	GTFIIDPAAVIR	GTFIIDPAAVIR	0.9795	#N/A	#N/A	36.43+/-0.02	#N/A	1271.72	2	636.869	#N/A	36.44	7003448	#N/A	7003448	57400	#N/A	57400	#N/A	0.008076	Biognosys standards			FALSE
20221010_MS_zenoSWATH_DC24_VACV_49C_r1.wiff	49C_r1	GTFIIDPAAVIR	12	C59H97N15O16	GTFIIDPAAVIR	GTFIIDPAAVIR	GTFIIDPAAVIR	GTFIIDPAAVIR	0.9797	#N/A	#N/A	36.43+/-0.02	#N/A	1271.72	2	636.869	#N/A	36.44	5032984	#N/A	5032984	16804	#N/A	16804	#N/A	0.010588	Biognosys standards			FALSE
20221010_MS_zenoSWATH_DC24_VACV_49C_r2.wiff	49C_r2	GTFIIDPAAVIR	12	C59H97N15O16	GTFIIDPAAVIR	GTFIIDPAAVIR	GTFIIDPAAVIR	GTFIIDPAAVIR	0.9823	#N/A	#N/A	36.43+/-0.02	#N/A	1271.72	2	636.869	#N/A	36.44	5699810	#N/A	5699810	67817	#N/A	67817	#N/A	0.009183	Biognosys standards			FALSE
20221010_MS_zenoSWATH_DC24_VACV_49C_r3.wiff	49C_r3	GTFIIDPAAVIR	12	C59H97N15O16	GTFIIDPAAVIR	GTFIIDPAAVIR	GTFIIDPAAVIR	GTFIIDPAAVIR	0.982	#N/A	#N/A	36.43+/-0.02	#N/A	1271.72	2	636.869	#N/A	36.44	4386996	#N/A	4386996	43232	#N/A	43232	#N/A	0.009936	Biognosys standards			FALSE
20221010_MS_zenoSWATH_DC24_VACV_53C_r1.wiff	53C_r1	GTFIIDPAAVIR	12	C59H97N15O16	GTFIIDPAAVIR	GTFIIDPAAVIR	GTFIIDPAAVIR	GTFIIDPAAVIR	0.9783	#N/A	#N/A	36.43+/-0.02	#N/A	1271.72	2	636.869	#N/A	36.44	6291264	#N/A	6291264	68800	#N/A	68800	#N/A	0.011846	Biognosys standards			FALSE
20221010_MS_zenoSWATH_DC24_VACV_53C_r2.wiff	53C_r2	GTFIIDPAAVIR	12	C59H97N15O16	GTFIIDPAAVIR	GTFIIDPAAVIR	GTFIIDPAAVIR	GTFIIDPAAVIR	0.9822	#N/A	#N/A	36.43+/-0.02	#N/A	1271.72	2	636.869	#N/A	36.44	4805219	#N/A	4805219	33034	#N/A	33034	#N/A	0.01153	Biognosys standards			FALSE
20221010_MS_zenoSWATH_DC24_VACV_53C_r3.wiff	53C_r3	GTFIIDPAAVIR	12	C59H97N15O16	GTFIIDPAAVIR	GTFIIDPAAVIR	GTFIIDPAAVIR	GTFIIDPAAVIR	0.9782	#N/A	#N/A	36.43+/-0.02	#N/A	1271.72	2	636.869	#N/A	36.44	3638855	#N/A	3638855	26371	#N/A	26371	#N/A	0.012446	Biognosys standards			FALSE
20221010_MS_zenoSWATH_DC24_VACV_57C_r1.wiff	57C_r1	GTFIIDPAAVIR	12	C59H97N15O16	GTFIIDPAAVIR	GTFIIDPAAVIR	GTFIIDPAAVIR	GTFIIDPAAVIR	0.9792	#N/A	#N/A	36.43+/-0.02	#N/A	1271.72	2	636.869	#N/A	36.44	4592963	#N/A	4592963	58247	#N/A	58247	#N/A	0.018087	Biognosys standards			FALSE
20221010_MS_zenoSWATH_DC24_VACV_57C_r2.wiff	57C_r2	GTFIIDPAAVIR	12	C59H97N15O16	GTFIIDPAAVIR	GTFIIDPAAVIR	GTFIIDPAAVIR	GTFIIDPAAVIR	0.9814	#N/A	#N/A	36.43+/-0.02	#N/A	1271.72	2	636.869	#N/A	36.44	3406553	#N/A	3406553	31651	#N/A	31651	#N/A	0.018415	Biognosys standards			FALSE
20221010_MS_zenoSWATH_DC24_VACV_57C_r3.wiff	57C_r3	GTFIIDPAAVIR	12	C59H97N15O16	GTFIIDPAAVIR	GTFIIDPAAVIR	GTFIIDPAAVIR	GTFIIDPAAVIR	0.9818	#N/A	#N/A	36.43+/-0.02	#N/A	1271.72	2	636.869	#N/A	36.44	4957814	#N/A	4957814	59003	#N/A	59003	#N/A	0.020399	Biognosys standards			FALSE
20221010_MS_zenoSWATH_DC24_VACV_61C_r1.wiff	61C_r1	GTFIIDPAAVIR	12	C59H97N15O16	GTFIIDPAAVIR	GTFIIDPAAVIR	GTFIIDPAAVIR	GTFIIDPAAVIR	0.9771	#N/A	#N/A	36.43+/-0.02	#N/A	1271.72	2	636.869	#N/A	36.44	6223624	#N/A	6223624	42863	#N/A	42863	#N/A	0.01575	Biognosys standards			FALSE
20221010_MS_zenoSWATH_DC24_VACV_61C_r2.wiff	61C_r2	GTFIIDPAAVIR	12	C59H97N15O16	GTFIIDPAAVIR	GTFIIDPAAVIR	GTFIIDPAAVIR	GTFIIDPAAVIR	0.9781	#N/A	#N/A	36.43+/-0.02	#N/A	1271.72	2	636.869	#N/A	36.44	6331656	#N/A	6331656	52852	#N/A	52852	#N/A	0.018916	Biognosys standards			FALSE
20221010_MS_zenoSWATH_DC24_VACV_61C_r3.wiff	61C_r3	GTFIIDPAAVIR	12	C59H97N15O16	GTFIIDPAAVIR	GTFIIDPAAVIR	GTFIIDPAAVIR	GTFIIDPAAVIR	0.9791	#N/A	#N/A	36.43+/-0.02	#N/A	1271.72	2	636.869	#N/A	36.44	4998849	#N/A	4998849	94912	#N/A	94912	#N/A	0.016876	Biognosys standards			FALSE
20221010_MS_zenoSWATH_DC24_VACV_65C_r1.wiff	65C_r1	GTFIIDPAAVIR	12	C59H97N15O16	GTFIIDPAAVIR	GTFIIDPAAVIR	GTFIIDPAAVIR	GTFIIDPAAVIR	0.9798	#N/A	#N/A	36.43+/-0.02	#N/A	1271.72	2	636.869	#N/A	36.44	6128077	#N/A	6128077	64923	#N/A	64923	#N/A	0.02001	Biognosys standards			FALSE
20221010_MS_zenoSWATH_DC24_VACV_65C_r2.wiff	65C_r2	GTFIIDPAAVIR	12	C59H97N15O16	GTFIIDPAAVIR	GTFIIDPAAVIR	GTFIIDPAAVIR	GTFIIDPAAVIR	0.9809	#N/A	#N/A	36.43+/-0.02	#N/A	1271.72	2	636.869	#N/A	36.44	3593845	#N/A	3593845	25077	#N/A	25077	#N/A	0.024601	Biognosys standards			FALSE
20221010_MS_zenoSWATH_DC24_VACV_65C_r3.wiff	65C_r3	GTFIIDPAAVIR	12	C59H97N15O16	GTFIIDPAAVIR	GTFIIDPAAVIR	GTFIIDPAAVIR	GTFIIDPAAVIR	0.9773	#N/A	#N/A	36.43+/-0.02	#N/A	1271.72	2	636.869	#N/A	36.44	7780612	#N/A	7780612	86189	#N/A	86189	#N/A	0.024343	Biognosys standards			FALSE
20221010_MS_zenoSWATH_DC24_VACV_69C_r1.wiff	69C_r1	GTFIIDPAAVIR	12	C59H97N15O16	GTFIIDPAAVIR	GTFIIDPAAVIR	GTFIIDPAAVIR	GTFIIDPAAVIR	0.9806	#N/A	#N/A	36.43+/-0.02	#N/A	1271.72	2	636.869	#N/A	36.44	5412961	#N/A	5412961	73570	#N/A	73570	#N/A	0.021385	Biognosys standards			FALSE
20221010_MS_zenoSWATH_DC24_VACV_69C_r2.wiff	69C_r2	GTFIIDPAAVIR	12	C59H97N15O16	GTFIIDPAAVIR	GTFIIDPAAVIR	GTFIIDPAAVIR	GTFIIDPAAVIR	0.9773	#N/A	#N/A	36.43+/-0.02	#N/A	1271.72	2	636.869	#N/A	36.44	5941610	#N/A	5941610	78667	#N/A	78667	#N/A	0.022243	Biognosys standards			FALSE
20221010_MS_zenoSWATH_DC24_VACV_69C_r3.wiff	69C_r3	GTFIIDPAAVIR	12	C59H97N15O16	GTFIIDPAAVIR	GTFIIDPAAVIR	GTFIIDPAAVIR	GTFIIDPAAVIR	0.9855	#N/A	#N/A	36.43+/-0.02	#N/A	1271.72	2	636.869	#N/A	36.44	2677983	#N/A	2677983	27367	#N/A	27367	#N/A	0.023143	Biognosys standards			FALSE
20221010_MS_zenoSWATH_DC24_VACV_73C_r1.wiff	73C_r1	GTFIIDPAAVIR	12	C59H97N15O16	GTFIIDPAAVIR	GTFIIDPAAVIR	GTFIIDPAAVIR	GTFIIDPAAVIR	0.98	#N/A	#N/A	36.43+/-0.02	#N/A	1271.72	2	636.869	#N/A	36.44	3673398	#N/A	3673398	25930	#N/A	25930	#N/A	0.022606	Biognosys standards			FALSE
20221010_MS_zenoSWATH_DC24_VACV_73C_r2.wiff	73C_r2	GTFIIDPAAVIR	12	C59H97N15O16	GTFIIDPAAVIR	GTFIIDPAAVIR	GTFIIDPAAVIR	GTFIIDPAAVIR	0.9818	#N/A	#N/A	36.43+/-0.02	#N/A	1271.72	2	636.869	#N/A	36.44	1615530	#N/A	1615530	8389	#N/A	8389	#N/A	0.013071	Biognosys standards			FALSE
20221010_MS_zenoSWATH_DC24_VACV_73C_r3.wiff	73C_r3	GTFIIDPAAVIR	12	C59H97N15O16	GTFIIDPAAVIR	GTFIIDPAAVIR	GTFIIDPAAVIR	GTFIIDPAAVIR	0.9768	#N/A	#N/A	36.43+/-0.02	#N/A	1271.72	2	636.869	#N/A	36.44	3815274	#N/A	3815274	12004	#N/A	12004	#N/A	0.014108	Biognosys standards			FALSE
20221010_MS_zenoSWATH_DC24_VACV_37C_r1.wiff	37C_r1	LFLQFGAQGSPFLK	14	C76H113N17O18	LFLQFGAQGSPFLK	LFLQFGAQGSPFLK	LFLQFGAQGSPFLK	LFLQFGAQGSPFLK	0.9612	#N/A	#N/A	38.93+/-0.02	0.0004	1551.84	2	776.93	#N/A	38.92	887390	#N/A	887390	2348	#N/A	2348	#N/A	0.000943	Biognosys standards			FALSE
20221010_MS_zenoSWATH_DC24_VACV_37C_r2.wiff	37C_r2	LFLQFGAQGSPFLK	14	C76H113N17O18	LFLQFGAQGSPFLK	LFLQFGAQGSPFLK	LFLQFGAQGSPFLK	LFLQFGAQGSPFLK	0.9552	#N/A	#N/A	38.93+/-0.02	0.0004	1551.84	2	776.93	#N/A	38.92	550865	#N/A	550865	3196	#N/A	3196	#N/A	0.000865	Biognosys standards			FALSE
20221010_MS_zenoSWATH_DC24_VACV_37C_r3.wiff	37C_r3	LFLQFGAQGSPFLK	14	C76H113N17O18	LFLQFGAQGSPFLK	LFLQFGAQGSPFLK	LFLQFGAQGSPFLK	LFLQFGAQGSPFLK	0.9546	#N/A	#N/A	38.93+/-0.02	0.0004	1551.84	2	776.93	#N/A	38.92	792650	#N/A	792650	1075	#N/A	1075	#N/A	0.001037	Biognosys standards			FALSE
20221010_MS_zenoSWATH_DC24_VACV_41C_r1.wiff	41C_r1	LFLQFGAQGSPFLK	14	C76H113N17O18	LFLQFGAQGSPFLK	LFLQFGAQGSPFLK	LFLQFGAQGSPFLK	LFLQFGAQGSPFLK	0.9584	#N/A	#N/A	38.93+/-0.02	#N/A	1551.84	2	776.93	#N/A	38.92	661426	#N/A	661426	6494	#N/A	6494	#N/A	0.000806	Biognosys standards			FALSE
20221010_MS_zenoSWATH_DC24_VACV_41C_r2.wiff	41C_r2	LFLQFGAQGSPFLK	14	C76H113N17O18	LFLQFGAQGSPFLK	LFLQFGAQGSPFLK	LFLQFGAQGSPFLK	LFLQFGAQGSPFLK	0.9591	#N/A	#N/A	38.93+/-0.02	#N/A	1551.84	2	776.93	#N/A	38.92	598470	#N/A	598470	2319	#N/A	2319	#N/A	0.000858	Biognosys standards			FALSE
20221010_MS_zenoSWATH_DC24_VACV_41C_r3.wiff	41C_r3	LFLQFGAQGSPFLK	14	C76H113N17O18	LFLQFGAQGSPFLK	LFLQFGAQGSPFLK	LFLQFGAQGSPFLK	LFLQFGAQGSPFLK	0.955	#N/A	#N/A	38.93+/-0.02	#N/A	1551.84	2	776.93	#N/A	38.92	677819	#N/A	677819	3389	#N/A	3389	#N/A	0.000957	Biognosys standards			FALSE
20221010_MS_zenoSWATH_DC24_VACV_45C_r1.wiff	45C_r1	LFLQFGAQGSPFLK	14	C76H113N17O18	LFLQFGAQGSPFLK	LFLQFGAQGSPFLK	LFLQFGAQGSPFLK	LFLQFGAQGSPFLK	0.9593	#N/A	#N/A	38.93+/-0.02	#N/A	1551.84	2	776.93	#N/A	38.92	940932	#N/A	940932	5246	#N/A	5246	#N/A	0.001029	Biognosys standards			FALSE
20221010_MS_zenoSWATH_DC24_VACV_45C_r2.wiff	45C_r2	LFLQFGAQGSPFLK	14	C76H113N17O18	LFLQFGAQGSPFLK	LFLQFGAQGSPFLK	LFLQFGAQGSPFLK	LFLQFGAQGSPFLK	0.9589	#N/A	#N/A	38.93+/-0.02	#N/A	1551.84	2	776.93	#N/A	38.92	512847	#N/A	512847	1194	#N/A	1194	#N/A	0.00089	Biognosys standards			FALSE
20221010_MS_zenoSWATH_DC24_VACV_45C_r3.wiff	45C_r3	LFLQFGAQGSPFLK	14	C76H113N17O18	LFLQFGAQGSPFLK	LFLQFGAQGSPFLK	LFLQFGAQGSPFLK	LFLQFGAQGSPFLK	0.9561	#N/A	#N/A	38.93+/-0.02	#N/A	1551.84	2	776.93	#N/A	38.92	790035	#N/A	790035	2267	#N/A	2267	#N/A	0.000911	Biognosys standards			FALSE
20221010_MS_zenoSWATH_DC24_VACV_49C_r1.wiff	49C_r1	LFLQFGAQGSPFLK	14	C76H113N17O18	LFLQFGAQGSPFLK	LFLQFGAQGSPFLK	LFLQFGAQGSPFLK	LFLQFGAQGSPFLK	0.9672	#N/A	#N/A	38.93+/-0.02	#N/A	1551.84	2	776.93	#N/A	38.92	474550	#N/A	474550	1764	#N/A	1764	#N/A	0.000998	Biognosys standards			FALSE
20221010_MS_zenoSWATH_DC24_VACV_49C_r2.wiff	49C_r2	LFLQFGAQGSPFLK	14	C76H113N17O18	LFLQFGAQGSPFLK	LFLQFGAQGSPFLK	LFLQFGAQGSPFLK	LFLQFGAQGSPFLK	0.9618	#N/A	#N/A	38.93+/-0.02	#N/A	1551.84	2	776.93	#N/A	38.92	529763	#N/A	529763	2340	#N/A	2340	#N/A	0.000854	Biognosys standards			FALSE
20221010_MS_zenoSWATH_DC24_VACV_49C_r3.wiff	49C_r3	LFLQFGAQGSPFLK	14	C76H113N17O18	LFLQFGAQGSPFLK	LFLQFGAQGSPFLK	LFLQFGAQGSPFLK	LFLQFGAQGSPFLK	0.9572	#N/A	#N/A	38.93+/-0.02	#N/A	1551.84	2	776.93	#N/A	38.92	252021	#N/A	252021	0	#N/A	0	#N/A	0.000571	Biognosys standards			FALSE
20221010_MS_zenoSWATH_DC24_VACV_53C_r1.wiff	53C_r1	LFLQFGAQGSPFLK	14	C76H113N17O18	LFLQFGAQGSPFLK	LFLQFGAQGSPFLK	LFLQFGAQGSPFLK	LFLQFGAQGSPFLK	0.9584	#N/A	#N/A	38.93+/-0.02	#N/A	1551.84	2	776.93	#N/A	38.92	656781	#N/A	656781	4069	#N/A	4069	#N/A	0.001237	Biognosys standards			FALSE
20221010_MS_zenoSWATH_DC24_VACV_53C_r2.wiff	53C_r2	LFLQFGAQGSPFLK	14	C76H113N17O18	LFLQFGAQGSPFLK	LFLQFGAQGSPFLK	LFLQFGAQGSPFLK	LFLQFGAQGSPFLK	0.9757	#N/A	#N/A	38.93+/-0.02	#N/A	1551.84	2	776.93	#N/A	38.92	215954	#N/A	215954	0	#N/A	0	#N/A	0.000518	Biognosys standards			FALSE
20221010_MS_zenoSWATH_DC24_VACV_53C_r3.wiff	53C_r3	LFLQFGAQGSPFLK	14	C76H113N17O18	LFLQFGAQGSPFLK	LFLQFGAQGSPFLK	LFLQFGAQGSPFLK	LFLQFGAQGSPFLK	0.9634	#N/A	#N/A	38.93+/-0.02	#N/A	1551.84	2	776.93	#N/A	38.92	354980	#N/A	354980	906	#N/A	906	#N/A	0.001214	Biognosys standards			FALSE
20221010_MS_zenoSWATH_DC24_VACV_57C_r1.wiff	57C_r1	LFLQFGAQGSPFLK	14	C76H113N17O18	LFLQFGAQGSPFLK	LFLQFGAQGSPFLK	LFLQFGAQGSPFLK	LFLQFGAQGSPFLK	0.9568	#N/A	#N/A	38.93+/-0.02	#N/A	1551.84	2	776.93	#N/A	38.92	535685	#N/A	535685	0	#N/A	0	#N/A	0.00211	Biognosys standards			FALSE
20221010_MS_zenoSWATH_DC24_VACV_57C_r2.wiff	57C_r2	LFLQFGAQGSPFLK	14	C76H113N17O18	LFLQFGAQGSPFLK	LFLQFGAQGSPFLK	LFLQFGAQGSPFLK	LFLQFGAQGSPFLK	0.9492	#N/A	#N/A	38.93+/-0.02	#N/A	1551.84	2	776.93	#N/A	38.92	373260	#N/A	373260	816	#N/A	816	#N/A	0.002018	Biognosys standards			FALSE
20221010_MS_zenoSWATH_DC24_VACV_57C_r3.wiff	57C_r3	LFLQFGAQGSPFLK	14	C76H113N17O18	LFLQFGAQGSPFLK	LFLQFGAQGSPFLK	LFLQFGAQGSPFLK	LFLQFGAQGSPFLK	0.9528	#N/A	#N/A	38.93+/-0.02	#N/A	1551.84	2	776.93	#N/A	38.92	542489	#N/A	542489	203	#N/A	203	#N/A	0.002232	Biognosys standards			FALSE
20221010_MS_zenoSWATH_DC24_VACV_61C_r1.wiff	61C_r1	LFLQFGAQGSPFLK	14	C76H113N17O18	LFLQFGAQGSPFLK	LFLQFGAQGSPFLK	LFLQFGAQGSPFLK	LFLQFGAQGSPFLK	0.9547	#N/A	#N/A	38.93+/-0.02	#N/A	1551.84	2	776.93	#N/A	38.92	694703	#N/A	694703	1521	#N/A	1521	#N/A	0.001758	Biognosys standards			FALSE
20221010_MS_zenoSWATH_DC24_VACV_61C_r2.wiff	61C_r2	LFLQFGAQGSPFLK	14	C76H113N17O18	LFLQFGAQGSPFLK	LFLQFGAQGSPFLK	LFLQFGAQGSPFLK	LFLQFGAQGSPFLK	0.9544	#N/A	#N/A	38.93+/-0.02	#N/A	1551.84	2	776.93	#N/A	38.92	696088	#N/A	696088	5390	#N/A	5390	#N/A	0.00208	Biognosys standards			FALSE
20221010_MS_zenoSWATH_DC24_VACV_61C_r3.wiff	61C_r3	LFLQFGAQGSPFLK	14	C76H113N17O18	LFLQFGAQGSPFLK	LFLQFGAQGSPFLK	LFLQFGAQGSPFLK	LFLQFGAQGSPFLK	0.9517	#N/A	#N/A	38.93+/-0.02	#N/A	1551.84	2	776.93	#N/A	38.92	501501	#N/A	501501	4708	#N/A	4708	#N/A	0.001693	Biognosys standards			FALSE
20221010_MS_zenoSWATH_DC24_VACV_65C_r1.wiff	65C_r1	LFLQFGAQGSPFLK	14	C76H113N17O18	LFLQFGAQGSPFLK	LFLQFGAQGSPFLK	LFLQFGAQGSPFLK	LFLQFGAQGSPFLK	0.9579	#N/A	#N/A	38.93+/-0.02	#N/A	1551.84	2	776.93	#N/A	38.92	666254	#N/A	666254	7803	#N/A	7803	#N/A	0.002175	Biognosys standards			FALSE
20221010_MS_zenoSWATH_DC24_VACV_65C_r2.wiff	65C_r2	LFLQFGAQGSPFLK	14	C76H113N17O18	LFLQFGAQGSPFLK	LFLQFGAQGSPFLK	LFLQFGAQGSPFLK	LFLQFGAQGSPFLK	0.9615	#N/A	#N/A	38.93+/-0.02	#N/A	1551.84	2	776.93	#N/A	38.92	399530	#N/A	399530	678	#N/A	678	#N/A	0.002735	Biognosys standards			FALSE
20221010_MS_zenoSWATH_DC24_VACV_65C_r3.wiff	65C_r3	LFLQFGAQGSPFLK	14	C76H113N17O18	LFLQFGAQGSPFLK	LFLQFGAQGSPFLK	LFLQFGAQGSPFLK	LFLQFGAQGSPFLK	0.9573	#N/A	#N/A	38.93+/-0.02	#N/A	1551.84	2	776.93	#N/A	38.92	946494	#N/A	946494	12479	#N/A	12479	#N/A	0.002961	Biognosys standards			FALSE
20221010_MS_zenoSWATH_DC24_VACV_69C_r1.wiff	69C_r1	LFLQFGAQGSPFLK	14	C76H113N17O18	LFLQFGAQGSPFLK	LFLQFGAQGSPFLK	LFLQFGAQGSPFLK	LFLQFGAQGSPFLK	0.9546	#N/A	#N/A	38.93+/-0.02	#N/A	1551.84	2	776.93	#N/A	38.92	742800	#N/A	742800	6202	#N/A	6202	#N/A	0.002935	Biognosys standards			FALSE
20221010_MS_zenoSWATH_DC24_VACV_69C_r2.wiff	69C_r2	LFLQFGAQGSPFLK	14	C76H113N17O18	LFLQFGAQGSPFLK	LFLQFGAQGSPFLK	LFLQFGAQGSPFLK	LFLQFGAQGSPFLK	0.9608	#N/A	#N/A	38.93+/-0.02	#N/A	1551.84	2	776.93	#N/A	38.92	605987	#N/A	605987	8756	#N/A	8756	#N/A	0.002269	Biognosys standards			FALSE
20221010_MS_zenoSWATH_DC24_VACV_69C_r3.wiff	69C_r3	LFLQFGAQGSPFLK	14	C76H113N17O18	LFLQFGAQGSPFLK	LFLQFGAQGSPFLK	LFLQFGAQGSPFLK	LFLQFGAQGSPFLK	0.9567	#N/A	#N/A	38.93+/-0.02	#N/A	1551.84	2	776.93	#N/A	38.92	304647	#N/A	304647	0	#N/A	0	#N/A	0.002633	Biognosys standards			FALSE
20221010_MS_zenoSWATH_DC24_VACV_73C_r1.wiff	73C_r1	LFLQFGAQGSPFLK	14	C76H113N17O18	LFLQFGAQGSPFLK	LFLQFGAQGSPFLK	LFLQFGAQGSPFLK	LFLQFGAQGSPFLK	0.9656	#N/A	#N/A	38.93+/-0.02	#N/A	1551.84	2	776.93	#N/A	38.92	445361	#N/A	445361	2724	#N/A	2724	#N/A	0.002741	Biognosys standards			FALSE
20221010_MS_zenoSWATH_DC24_VACV_73C_r2.wiff	73C_r2	LFLQFGAQGSPFLK	14	C76H113N17O18	LFLQFGAQGSPFLK	LFLQFGAQGSPFLK	LFLQFGAQGSPFLK	LFLQFGAQGSPFLK	0.9638	#N/A	#N/A	38.93+/-0.02	#N/A	1551.84	2	776.93	#N/A	38.92	171826	#N/A	171826	0	#N/A	0	#N/A	0.00139	Biognosys standards			FALSE
20221010_MS_zenoSWATH_DC24_VACV_73C_r3.wiff	73C_r3	LFLQFGAQGSPFLK	14	C76H113N17O18	LFLQFGAQGSPFLK	LFLQFGAQGSPFLK	LFLQFGAQGSPFLK	LFLQFGAQGSPFLK	0.954	#N/A	#N/A	38.93+/-0.02	#N/A	1551.84	2	776.93	#N/A	38.92	421930	#N/A	421930	526	#N/A	526	#N/A	0.00156	Biognosys standards			FALSE
20221010_MS_zenoSWATH_DC24_VACV_37C_r1.wiff	37C_r1	TSYKFESV	8	C44H65N9O15	TSYKFESV	TSYKFESV	TSYKFESV	TSYKFESV	0.9783	0.9935	#N/A	19.11+/-0.94	0	959.46	2	480.737	#N/A	18.79	498544	169539	329005	160	160	0	#N/A	0.00053	VACV			FALSE
20221010_MS_zenoSWATH_DC24_VACV_37C_r2.wiff	37C_r2	TSYKFESV	8	C44H65N9O15	TSYKFESV	TSYKFESV	TSYKFESV	TSYKFESV	0.9752	0.9938	#N/A	19.11+/-0.94	0	959.46	2	480.737	#N/A	18.79	392449	135322	257127	249	249	0	#N/A	0.000616	VACV			FALSE
20221010_MS_zenoSWATH_DC24_VACV_37C_r3.wiff	37C_r3	TSYKFESV	8	C44H65N9O15	TSYKFESV	TSYKFESV	TSYKFESV	TSYKFESV	0.9863	0.9977	#N/A	19.11+/-0.94	0	959.46	2	480.737	#N/A	18.79	434740	137140	297601	2139	2139	0	#N/A	0.000569	VACV			FALSE
20221010_MS_zenoSWATH_DC24_VACV_41C_r1.wiff	41C_r1	TSYKFESV	8	C44H65N9O15	TSYKFESV	TSYKFESV	TSYKFESV	TSYKFESV	0.9668	0.9959	#N/A	19.11+/-0.94	0	959.46	2	480.737	#N/A	18.79	433366	152600	280766	6302	3087	3216	#N/A	0.000528	VACV			FALSE
20221010_MS_zenoSWATH_DC24_VACV_41C_r2.wiff	41C_r2	TSYKFESV	8	C44H65N9O15	TSYKFESV	TSYKFESV	TSYKFESV	TSYKFESV	0.9819	0.9921	#N/A	19.11+/-0.94	0	959.46	2	480.737	#N/A	18.79	529150	178635	350515	7013	5291	1722	#N/A	0.000759	VACV			FALSE
20221010_MS_zenoSWATH_DC24_VACV_41C_r3.wiff	41C_r3	TSYKFESV	8	C44H65N9O15	TSYKFESV	TSYKFESV	TSYKFESV	TSYKFESV	0.9816	0.9894	#N/A	19.11+/-0.94	0	959.46	2	480.737	#N/A	18.79	443950	147297	296653	1536	1536	0	#N/A	0.000627	VACV			FALSE
20221010_MS_zenoSWATH_DC24_VACV_45C_r1.wiff	45C_r1	TSYKFESV	8	C44H65N9O15	TSYKFESV	TSYKFESV	TSYKFESV	TSYKFESV	0.9674	0.9939	#N/A	19.11+/-0.94	0	959.46	2	480.737	#N/A	18.79	480320	166268	314052	4498	1785	2713	#N/A	0.000525	VACV			FALSE
20221010_MS_zenoSWATH_DC24_VACV_45C_r2.wiff	45C_r2	TSYKFESV	8	C44H65N9O15	TSYKFESV	TSYKFESV	TSYKFESV	TSYKFESV	0.9704	0.9912	#N/A	19.11+/-0.94	0	959.46	2	480.737	#N/A	18.79	295136	99556	195580	1181	1181	0	#N/A	0.000512	VACV			FALSE
20221010_MS_zenoSWATH_DC24_VACV_45C_r3.wiff	45C_r3	TSYKFESV	8	C44H65N9O15	TSYKFESV	TSYKFESV	TSYKFESV	TSYKFESV	0.9877	0.9945	#N/A	19.11+/-0.94	0	959.46	2	480.737	#N/A	18.79	462024	156676	305348	383	383	0	#N/A	0.000533	VACV			FALSE
20221010_MS_zenoSWATH_DC24_VACV_49C_r1.wiff	49C_r1	TSYKFESV	8	C44H65N9O15	TSYKFESV	TSYKFESV	TSYKFESV	TSYKFESV	0.9647	0.9932	#N/A	19.11+/-0.94	0	959.46	2	480.737	#N/A	18.79	134348	45256	89091	0	0	0	#N/A	0.000283	VACV			FALSE
20221010_MS_zenoSWATH_DC24_VACV_49C_r2.wiff	49C_r2	TSYKFESV	8	C44H65N9O15	TSYKFESV	TSYKFESV	TSYKFESV	TSYKFESV	0.9867	0.993	#N/A	19.11+/-0.94	0	959.46	2	480.737	#N/A	18.79	445595	150269	295326	1888	1888	0	#N/A	0.000718	VACV			FALSE
20221010_MS_zenoSWATH_DC24_VACV_49C_r3.wiff	49C_r3	TSYKFESV	8	C44H65N9O15	TSYKFESV	TSYKFESV	TSYKFESV	TSYKFESV	0.9767	0.9903	#N/A	19.11+/-0.94	0	959.46	2	480.737	#N/A	18.79	248693	83893	164800	688	688	0	#N/A	0.000563	VACV			FALSE
20221010_MS_zenoSWATH_DC24_VACV_53C_r1.wiff	53C_r1	TSYKFESV	8	C44H65N9O15	TSYKFESV	TSYKFESV	TSYKFESV	TSYKFESV	0.9746	0.9806	#N/A	19.11+/-0.94	0	959.46	2	480.737	#N/A	18.79	199865	69190	130675	0	0	0	#N/A	0.000376	VACV			FALSE
20221010_MS_zenoSWATH_DC24_VACV_53C_r2.wiff	53C_r2	TSYKFESV	8	C44H65N9O15	TSYKFESV	TSYKFESV	TSYKFESV	TSYKFESV	0.9748	0.9939	#N/A	19.11+/-0.94	0	959.46	2	480.737	#N/A	18.79	394851	138933	255917	279	279	0	#N/A	0.000947	VACV			FALSE
20221010_MS_zenoSWATH_DC24_VACV_53C_r3.wiff	53C_r3	TSYKFESV	8	C44H65N9O15	TSYKFESV	TSYKFESV	TSYKFESV	TSYKFESV	0.9618	0.9853	#N/A	19.11+/-0.94	0	959.46	2	480.737	#N/A	18.79	187750	64922	122828	0	0	0	#N/A	0.000642	VACV			FALSE
20221010_MS_zenoSWATH_DC24_VACV_57C_r1.wiff	57C_r1	TSYKFESV	8	C44H65N9O15	TSYKFESV	TSYKFESV	TSYKFESV	TSYKFESV	0.9703	0.9565	#N/A	19.11+/-0.94	0	959.46	2	480.737	#N/A	18.79	43034	17558	25476	0	0	0	#N/A	0.000169	VACV			FALSE
20221010_MS_zenoSWATH_DC24_VACV_57C_r2.wiff	57C_r2	TSYKFESV	8	C44H65N9O15	TSYKFESV	TSYKFESV	TSYKFESV	TSYKFESV	0.9451	0.9279	#N/A	19.11+/-0.94	0	959.46	2	480.737	#N/A	18.79	23314	9477	13837	0	0	0	#N/A	0.000126	VACV			FALSE
20221010_MS_zenoSWATH_DC24_VACV_57C_r3.wiff	57C_r3	TSYKFESV	8	C44H65N9O15	TSYKFESV	TSYKFESV	TSYKFESV	TSYKFESV	0.8838	0.9186	#N/A	19.11+/-0.94	0.0008	959.46	2	480.737	#N/A	18.79	17920	8412	9508	0	0	0	#N/A	7.4e-05	VACV			FALSE
20221010_MS_zenoSWATH_DC24_VACV_61C_r1.wiff	61C_r1	TSYKFESV	8	C44H65N9O15	TSYKFESV	TSYKFESV	TSYKFESV	TSYKFESV	0.7672	0.9309	#N/A	19.11+/-0.94	0.0621	959.46	2	480.737	#N/A	18.79	7240	4573	2667	0	0	0	#N/A	1.8e-05	VACV			FALSE
20221010_MS_zenoSWATH_DC24_VACV_61C_r2.wiff	61C_r2	TSYKFESV	8	C44H65N9O15	TSYKFESV	TSYKFESV	TSYKFESV	TSYKFESV	0.6332	0.741	#N/A	19.11+/-0.94	0.1968	959.46	2	480.737	#N/A	18.79	1200	478	723	62	62	0	#N/A	4e-06	VACV			FALSE
20221010_MS_zenoSWATH_DC24_VACV_61C_r3.wiff	61C_r3	TSYKFESV	8	C44H65N9O15	TSYKFESV	TSYKFESV	TSYKFESV	TSYKFESV	0.4897	0.9252	#N/A	19.11+/-0.94	0.2637	959.46	2	480.737	#N/A	18.79	3392	1992	1401	198	198	0	#N/A	1.1e-05	VACV			FALSE
20221010_MS_zenoSWATH_DC24_VACV_65C_r1.wiff	65C_r1	TSYKFESV	8	C44H65N9O15	TSYKFESV	TSYKFESV	TSYKFESV	TSYKFESV	0.2064	0.7873	#N/A	19.11+/-0.94	0.3729	959.46	2	480.737	#N/A	18.79	1003	346	657	132	132	0	#N/A	3e-06	VACV			FALSE
20221010_MS_zenoSWATH_DC24_VACV_65C_r2.wiff	65C_r2	TSYKFESV	8	C44H65N9O15	TSYKFESV	TSYKFESV	TSYKFESV	TSYKFESV	0.0918	0.6491	#N/A	19.11+/-0.94	0.4157	959.46	2	480.737	#N/A	18.79	185	113	72	18	18	0	#N/A	1e-06	VACV			FALSE
20221010_MS_zenoSWATH_DC24_VACV_65C_r3.wiff	65C_r3	TSYKFESV	8	C44H65N9O15	TSYKFESV	TSYKFESV	TSYKFESV	TSYKFESV	0.0918	0.5204	#N/A	19.11+/-0.94	0.3995	959.46	2	480.737	#N/A	18.79	293	201	92	0	0	0	#N/A	1e-06	VACV			FALSE
20221010_MS_zenoSWATH_DC24_VACV_69C_r1.wiff	69C_r1	TSYKFESV	8	C44H65N9O15	TSYKFESV	TSYKFESV	TSYKFESV	TSYKFESV	0.0918	0.2041	#N/A	19.11+/-0.94	0.3995	959.46	2	480.737	#N/A	18.79	584	215	368	0	0	0	#N/A	2e-06	VACV			FALSE
20221010_MS_zenoSWATH_DC24_VACV_69C_r2.wiff	69C_r2	TSYKFESV	8	C44H65N9O15	TSYKFESV	TSYKFESV	TSYKFESV	TSYKFESV	0.2529	0.7074	#N/A	19.11+/-0.94	0.3381	959.46	2	480.737	#N/A	18.79	1506	789	717	0	0	0	#N/A	6e-06	VACV			FALSE
20221010_MS_zenoSWATH_DC24_VACV_69C_r3.wiff	69C_r3	TSYKFESV	8	C44H65N9O15	TSYKFESV	TSYKFESV	TSYKFESV	TSYKFESV	0.0918	0.8218	#N/A	19.11+/-0.94	0.3995	959.46	2	480.737	#N/A	18.79	318	226	92	5	5	0	#N/A	3e-06	VACV			FALSE
20221010_MS_zenoSWATH_DC24_VACV_73C_r1.wiff	73C_r1	TSYKFESV	8	C44H65N9O15	TSYKFESV	TSYKFESV	TSYKFESV	TSYKFESV	0.0918	0.49	#N/A	19.11+/-0.94	0.404	959.46	2	480.737	#N/A	18.79	175	8	167	18	18	0	#N/A	1e-06	VACV			FALSE
20221010_MS_zenoSWATH_DC24_VACV_73C_r2.wiff	73C_r2	TSYKFESV	8	C44H65N9O15	TSYKFESV	TSYKFESV	TSYKFESV	TSYKFESV	0.0918	0.5982	#N/A	19.11+/-0.94	0.3995	959.46	2	480.737	#N/A	18.79	819	563	256	0	0	0	#N/A	7e-06	VACV			FALSE
20221010_MS_zenoSWATH_DC24_VACV_73C_r3.wiff	73C_r3	TSYKFESV	8	C44H65N9O15	TSYKFESV	TSYKFESV	TSYKFESV	TSYKFESV	0.0918	0.2882	#N/A	19.11+/-0.94	0.3995	959.46	2	480.737	#N/A	18.79	220	83	136	0	0	0	#N/A	1e-06	VACV			FALSE
20221010_MS_zenoSWATH_DC24_VACV_37C_r1.wiff	37C_r1	ITYRFYLINL	10	C65H98N14O15	ITYRFYLINL	ITYRFYLINL	ITYRFYLINL	ITYRFYLINL	0.9622	0.9955	#N/A	40.73+/-0.02	0	1314.73	2	658.374	#N/A	40.74	389601	146412	243189	1319	1319	0	#N/A	0.000414	VACV			FALSE
20221010_MS_zenoSWATH_DC24_VACV_37C_r2.wiff	37C_r2	ITYRFYLINL	10	C65H98N14O15	ITYRFYLINL	ITYRFYLINL	ITYRFYLINL	ITYRFYLINL	0.9599	0.9943	#N/A	40.73+/-0.02	0	1314.73	2	658.374	#N/A	40.74	298781	107141	191640	327	327	0	#N/A	0.000469	VACV			FALSE
20221010_MS_zenoSWATH_DC24_VACV_37C_r3.wiff	37C_r3	ITYRFYLINL	10	C65H98N14O15	ITYRFYLINL	ITYRFYLINL	ITYRFYLINL	ITYRFYLINL	0.9663	0.9917	#N/A	40.73+/-0.02	0	1314.73	2	658.374	#N/A	40.74	160482	56971	103512	201	201	0	#N/A	0.00021	VACV			FALSE
20221010_MS_zenoSWATH_DC24_VACV_41C_r1.wiff	41C_r1	ITYRFYLINL	10	C65H98N14O15	ITYRFYLINL	ITYRFYLINL	ITYRFYLINL	ITYRFYLINL	0.9745	0.9957	#N/A	40.73+/-0.02	0	1314.73	2	658.374	#N/A	40.74	141409	50685	90724	487	487	0	#N/A	0.000172	VACV			FALSE
20221010_MS_zenoSWATH_DC24_VACV_41C_r2.wiff	41C_r2	ITYRFYLINL	10	C65H98N14O15	ITYRFYLINL	ITYRFYLINL	ITYRFYLINL	ITYRFYLINL	0.972	0.9909	#N/A	40.73+/-0.02	0	1314.73	2	658.374	#N/A	40.74	206966	78388	128577	0	0	0	#N/A	0.000297	VACV			FALSE
20221010_MS_zenoSWATH_DC24_VACV_41C_r3.wiff	41C_r3	ITYRFYLINL	10	C65H98N14O15	ITYRFYLINL	ITYRFYLINL	ITYRFYLINL	ITYRFYLINL	0.9523	0.9899	#N/A	40.73+/-0.02	0	1314.73	2	658.374	#N/A	40.74	368590	131388	237203	0	0	0	#N/A	0.00052	VACV			FALSE
20221010_MS_zenoSWATH_DC24_VACV_45C_r1.wiff	45C_r1	ITYRFYLINL	10	C65H98N14O15	ITYRFYLINL	ITYRFYLINL	ITYRFYLINL	ITYRFYLINL	0.9735	0.997	#N/A	40.73+/-0.02	0	1314.73	2	658.374	#N/A	40.74	705855	266964	438891	2614	1441	1172	#N/A	0.000772	VACV			FALSE
20221010_MS_zenoSWATH_DC24_VACV_45C_r2.wiff	45C_r2	ITYRFYLINL	10	C65H98N14O15	ITYRFYLINL	ITYRFYLINL	ITYRFYLINL	ITYRFYLINL	0.9592	0.9922	#N/A	40.73+/-0.02	0	1314.73	2	658.374	#N/A	40.74	222141	83914	138227	0	0	0	#N/A	0.000386	VACV			FALSE
20221010_MS_zenoSWATH_DC24_VACV_45C_r3.wiff	45C_r3	ITYRFYLINL	10	C65H98N14O15	ITYRFYLINL	ITYRFYLINL	ITYRFYLINL	ITYRFYLINL	0.9853	0.9945	#N/A	40.73+/-0.02	0	1314.73	2	658.374	#N/A	40.74	487363	187764	299599	5100	2778	2322	#N/A	0.000562	VACV			FALSE
20221010_MS_zenoSWATH_DC24_VACV_49C_r1.wiff	49C_r1	ITYRFYLINL	10	C65H98N14O15	ITYRFYLINL	ITYRFYLINL	ITYRFYLINL	ITYRFYLINL	0.9794	0.9927	#N/A	40.73+/-0.02	0	1314.73	2	658.374	#N/A	40.74	337454	126146	211308	3042	2352	690	#N/A	0.00071	VACV			FALSE
20221010_MS_zenoSWATH_DC24_VACV_49C_r2.wiff	49C_r2	ITYRFYLINL	10	C65H98N14O15	ITYRFYLINL	ITYRFYLINL	ITYRFYLINL	ITYRFYLINL	0.9442	0.9977	#N/A	40.73+/-0.02	0	1314.73	2	658.374	#N/A	40.74	143900	56769	87131	0	0	0	#N/A	0.000232	VACV			FALSE
20221010_MS_zenoSWATH_DC24_VACV_49C_r3.wiff	49C_r3	ITYRFYLINL	10	C65H98N14O15	ITYRFYLINL	ITYRFYLINL	ITYRFYLINL	ITYRFYLINL	0.8901	0.9866	#N/A	40.73+/-0.02	0.02	1314.73	2	658.374	#N/A	40.74	42044	14871	27173	0	0	0	#N/A	9.5e-05	VACV			FALSE
20221010_MS_zenoSWATH_DC24_VACV_53C_r1.wiff	53C_r1	ITYRFYLINL	10	C65H98N14O15	ITYRFYLINL	ITYRFYLINL	ITYRFYLINL	ITYRFYLINL	0.9691	0.9933	#N/A	40.73+/-0.02	0	1314.73	2	658.374	#N/A	40.74	279547	104805	174742	1709	1709	0	#N/A	0.000526	VACV			FALSE
20221010_MS_zenoSWATH_DC24_VACV_53C_r2.wiff	53C_r2	ITYRFYLINL	10	C65H98N14O15	ITYRFYLINL	ITYRFYLINL	ITYRFYLINL	ITYRFYLINL	0.8204	0.9594	#N/A	40.73+/-0.02	0.0146	1314.73	2	658.374	#N/A	40.74	13389	5319	8070	0	0	0	#N/A	3.2e-05	VACV			FALSE
20221010_MS_zenoSWATH_DC24_VACV_53C_r3.wiff	53C_r3	ITYRFYLINL	10	C65H98N14O15	ITYRFYLINL	ITYRFYLINL	ITYRFYLINL	ITYRFYLINL	0.861	0.982	#N/A	40.73+/-0.02	0.0075	1314.73	2	658.374	#N/A	40.74	32043	10874	21169	74	74	0	#N/A	0.00011	VACV			FALSE
20221010_MS_zenoSWATH_DC24_VACV_57C_r1.wiff	57C_r1	ITYRFYLINL	10	C65H98N14O15	ITYRFYLINL	ITYRFYLINL	ITYRFYLINL	ITYRFYLINL	0.9894	0.9933	#N/A	40.73+/-0.02	0	1314.73	2	658.374	#N/A	40.74	906973	362307	544666	8382	281	8101	#N/A	0.003572	VACV			FALSE
20221010_MS_zenoSWATH_DC24_VACV_57C_r2.wiff	57C_r2	ITYRFYLINL	10	C65H98N14O15	ITYRFYLINL	ITYRFYLINL	ITYRFYLINL	ITYRFYLINL	0.9741	0.993	#N/A	40.73+/-0.02	0	1314.73	2	658.374	#N/A	40.74	901039	331939	569100	1118	1118	0	#N/A	0.004871	VACV			FALSE
20221010_MS_zenoSWATH_DC24_VACV_57C_r3.wiff	57C_r3	ITYRFYLINL	10	C65H98N14O15	ITYRFYLINL	ITYRFYLINL	ITYRFYLINL	ITYRFYLINL	0.9725	0.991	#N/A	40.73+/-0.02	0	1314.73	2	658.374	#N/A	40.74	792294	319643	472651	1600	0	1600	#N/A	0.00326	VACV			FALSE
20221010_MS_zenoSWATH_DC24_VACV_61C_r1.wiff	61C_r1	ITYRFYLINL	10	C65H98N14O15	ITYRFYLINL	ITYRFYLINL	ITYRFYLINL	ITYRFYLINL	0.9676	0.9928	#N/A	40.73+/-0.02	0	1314.73	2	658.374	#N/A	40.74	1011299	393406	617894	3022	0	3022	#N/A	0.002559	VACV			FALSE
20221010_MS_zenoSWATH_DC24_VACV_61C_r2.wiff	61C_r2	ITYRFYLINL	10	C65H98N14O15	ITYRFYLINL	ITYRFYLINL	ITYRFYLINL	ITYRFYLINL	0.9701	0.9982	#N/A	40.73+/-0.02	0	1314.73	2	658.374	#N/A	40.74	947354	368246	579109	2038	0	2038	#N/A	0.00283	VACV			FALSE
20221010_MS_zenoSWATH_DC24_VACV_61C_r3.wiff	61C_r3	ITYRFYLINL	10	C65H98N14O15	ITYRFYLINL	ITYRFYLINL	ITYRFYLINL	ITYRFYLINL	0.9785	0.9954	#N/A	40.73+/-0.02	0	1314.73	2	658.374	#N/A	40.74	1116226	427167	689060	2589	1669	919	#N/A	0.003768	VACV			FALSE
20221010_MS_zenoSWATH_DC24_VACV_65C_r1.wiff	65C_r1	ITYRFYLINL	10	C65H98N14O15	ITYRFYLINL	ITYRFYLINL	ITYRFYLINL	ITYRFYLINL	0.9808	0.9954	#N/A	40.73+/-0.02	0	1314.73	2	658.374	#N/A	40.74	2389036	968095	1420942	26860	9224	17636	#N/A	0.007801	VACV			FALSE
20221010_MS_zenoSWATH_DC24_VACV_65C_r2.wiff	65C_r2	ITYRFYLINL	10	C65H98N14O15	ITYRFYLINL	ITYRFYLINL	ITYRFYLINL	ITYRFYLINL	0.9704	0.9963	#N/A	40.73+/-0.02	0	1314.73	2	658.374	#N/A	40.74	609503	231317	378187	4143	2150	1993	#N/A	0.004172	VACV			FALSE
20221010_MS_zenoSWATH_DC24_VACV_65C_r3.wiff	65C_r3	ITYRFYLINL	10	C65H98N14O15	ITYRFYLINL	ITYRFYLINL	ITYRFYLINL	ITYRFYLINL	0.9778	0.9968	#N/A	40.73+/-0.02	0	1314.73	2	658.374	#N/A	40.74	1798158	724084	1074074	12255	9267	2988	#N/A	0.005626	VACV			FALSE
20221010_MS_zenoSWATH_DC24_VACV_69C_r1.wiff	69C_r1	ITYRFYLINL	10	C65H98N14O15	ITYRFYLINL	ITYRFYLINL	ITYRFYLINL	ITYRFYLINL	0.9816	0.9968	#N/A	40.73+/-0.02	0	1314.73	2	658.374	#N/A	40.74	2687146	1059280	1627865	31332	12112	19220	#N/A	0.010616	VACV			FALSE
20221010_MS_zenoSWATH_DC24_VACV_69C_r2.wiff	69C_r2	ITYRFYLINL	10	C65H98N14O15	ITYRFYLINL	ITYRFYLINL	ITYRFYLINL	ITYRFYLINL	0.9829	0.9975	#N/A	40.73+/-0.02	0	1314.73	2	658.374	#N/A	40.74	2598777	1035068	1563709	18172	2078	16094	#N/A	0.009729	VACV			FALSE
20221010_MS_zenoSWATH_DC24_VACV_69C_r3.wiff	69C_r3	ITYRFYLINL	10	C65H98N14O15	ITYRFYLINL	ITYRFYLINL	ITYRFYLINL	ITYRFYLINL	0.9853	0.9969	#N/A	40.73+/-0.02	0	1314.73	2	658.374	#N/A	40.74	1226974	466651	760323	18854	5024	13830	#N/A	0.010603	VACV			FALSE
20221010_MS_zenoSWATH_DC24_VACV_73C_r1.wiff	73C_r1	ITYRFYLINL	10	C65H98N14O15	ITYRFYLINL	ITYRFYLINL	ITYRFYLINL	ITYRFYLINL	0.9776	0.9953	#N/A	40.73+/-0.02	0	1314.73	2	658.374	#N/A	40.74	1845665	724932	1120733	16539	11518	5022	#N/A	0.011358	VACV			FALSE
20221010_MS_zenoSWATH_DC24_VACV_73C_r2.wiff	73C_r2	ITYRFYLINL	10	C65H98N14O15	ITYRFYLINL	ITYRFYLINL	ITYRFYLINL	ITYRFYLINL	0.9867	0.9985	#N/A	40.73+/-0.02	0	1314.73	2	658.374	#N/A	40.74	1818873	713408	1105465	23391	9632	13759	#N/A	0.014716	VACV			FALSE
20221010_MS_zenoSWATH_DC24_VACV_73C_r3.wiff	73C_r3	ITYRFYLINL	10	C65H98N14O15	ITYRFYLINL	ITYRFYLINL	ITYRFYLINL	ITYRFYLINL	0.982	0.9994	#N/A	40.73+/-0.02	0	1314.73	2	658.374	#N/A	40.74	4487394	1813141	2674254	89830	37478	52352	#N/A	0.016593	VACV			FALSE
20221010_MS_zenoSWATH_DC24_VACV_37C_r1.wiff	37C_r1	KNYLFNAI	8	C47H71N11O12	KNYLFNAI	KNYLFNAI	KNYLFNAI	KNYLFNAI	0.9713	0.9959	#N/A	28.76+/-1.45	0	981.528	2	491.771	#N/A	29.1	962873	302215	660658	4829	1322	3507	#N/A	0.001023	VACV			FALSE
20221010_MS_zenoSWATH_DC24_VACV_37C_r2.wiff	37C_r2	KNYLFNAI	8	C47H71N11O12	KNYLFNAI	KNYLFNAI	KNYLFNAI	KNYLFNAI	0.9777	0.9972	#N/A	28.76+/-1.45	0	981.528	2	491.771	#N/A	29.1	670747	197243	473504	4633	2723	1910	#N/A	0.001053	VACV			FALSE
20221010_MS_zenoSWATH_DC24_VACV_37C_r3.wiff	37C_r3	KNYLFNAI	8	C47H71N11O12	KNYLFNAI	KNYLFNAI	KNYLFNAI	KNYLFNAI	0.9716	0.9987	#N/A	28.76+/-1.45	0	981.528	2	491.771	#N/A	29.1	728582	222330	506252	1288	1288	0	#N/A	0.000953	VACV			FALSE
20221010_MS_zenoSWATH_DC24_VACV_41C_r1.wiff	41C_r1	KNYLFNAI	8	C47H71N11O12	KNYLFNAI	KNYLFNAI	KNYLFNAI	KNYLFNAI	0.9826	0.9978	#N/A	28.76+/-1.45	0	981.528	2	491.771	#N/A	29.1	675088	199433	475656	268	36	233	#N/A	0.000823	VACV			FALSE
20221010_MS_zenoSWATH_DC24_VACV_41C_r2.wiff	41C_r2	KNYLFNAI	8	C47H71N11O12	KNYLFNAI	KNYLFNAI	KNYLFNAI	KNYLFNAI	0.9833	0.9904	#N/A	28.76+/-1.45	0	981.528	2	491.771	#N/A	29.1	697900	208916	488984	12357	5417	6940	#N/A	0.001001	VACV			FALSE
20221010_MS_zenoSWATH_DC24_VACV_41C_r3.wiff	41C_r3	KNYLFNAI	8	C47H71N11O12	KNYLFNAI	KNYLFNAI	KNYLFNAI	KNYLFNAI	0.9712	0.9939	#N/A	28.76+/-1.45	0	981.528	2	491.771	#N/A	29.1	743365	212138	531227	4933	3303	1630	#N/A	0.001049	VACV			FALSE
20221010_MS_zenoSWATH_DC24_VACV_45C_r1.wiff	45C_r1	KNYLFNAI	8	C47H71N11O12	KNYLFNAI	KNYLFNAI	KNYLFNAI	KNYLFNAI	0.973	0.9925	#N/A	28.76+/-1.45	0	981.528	2	491.771	#N/A	29.1	868363	265388	602975	1823	323	1499	#N/A	0.00095	VACV			FALSE
20221010_MS_zenoSWATH_DC24_VACV_45C_r2.wiff	45C_r2	KNYLFNAI	8	C47H71N11O12	KNYLFNAI	KNYLFNAI	KNYLFNAI	KNYLFNAI	0.9812	0.989	#N/A	28.76+/-1.45	0	981.528	2	491.771	#N/A	29.1	539270	160429	378841	6033	3347	2686	#N/A	0.000936	VACV			FALSE
20221010_MS_zenoSWATH_DC24_VACV_45C_r3.wiff	45C_r3	KNYLFNAI	8	C47H71N11O12	KNYLFNAI	KNYLFNAI	KNYLFNAI	KNYLFNAI	0.9762	0.9905	#N/A	28.76+/-1.45	0	981.528	2	491.771	#N/A	29.1	864856	257342	607514	3140	3140	0	#N/A	0.000997	VACV			FALSE
20221010_MS_zenoSWATH_DC24_VACV_49C_r1.wiff	49C_r1	KNYLFNAI	8	C47H71N11O12	KNYLFNAI	KNYLFNAI	KNYLFNAI	KNYLFNAI	0.9613	0.9786	#N/A	28.76+/-1.45	0	981.528	2	491.771	#N/A	29.1	173652	54982	118669	137	137	0	#N/A	0.000365	VACV			FALSE
20221010_MS_zenoSWATH_DC24_VACV_49C_r2.wiff	49C_r2	KNYLFNAI	8	C47H71N11O12	KNYLFNAI	KNYLFNAI	KNYLFNAI	KNYLFNAI	0.9818	0.9897	#N/A	28.76+/-1.45	0	981.528	2	491.771	#N/A	29.1	560668	164325	396343	4432	1897	2534	#N/A	0.000903	VACV			FALSE
20221010_MS_zenoSWATH_DC24_VACV_49C_r3.wiff	49C_r3	KNYLFNAI	8	C47H71N11O12	KNYLFNAI	KNYLFNAI	KNYLFNAI	KNYLFNAI	0.9764	0.9892	#N/A	28.76+/-1.45	0	981.528	2	491.771	#N/A	29.1	391571	113603	277968	981	981	0	#N/A	0.000887	VACV			FALSE
20221010_MS_zenoSWATH_DC24_VACV_53C_r1.wiff	53C_r1	KNYLFNAI	8	C47H71N11O12	KNYLFNAI	KNYLFNAI	KNYLFNAI	KNYLFNAI	0.9686	0.9925	#N/A	28.76+/-1.45	0	981.528	2	491.771	#N/A	29.1	442655	131346	311309	1025	1025	0	#N/A	0.000833	VACV			FALSE
20221010_MS_zenoSWATH_DC24_VACV_53C_r2.wiff	53C_r2	KNYLFNAI	8	C47H71N11O12	KNYLFNAI	KNYLFNAI	KNYLFNAI	KNYLFNAI	0.9745	0.9701	#N/A	28.76+/-1.45	0	981.528	2	491.771	#N/A	29.1	206955	64817	142138	43	43	0	#N/A	0.000497	VACV			FALSE
20221010_MS_zenoSWATH_DC24_VACV_53C_r3.wiff	53C_r3	KNYLFNAI	8	C47H71N11O12	KNYLFNAI	KNYLFNAI	KNYLFNAI	KNYLFNAI	0.9648	0.9806	#N/A	28.76+/-1.45	0	981.528	2	491.771	#N/A	29.1	199520	63188	136332	330	0	330	#N/A	0.000682	VACV			FALSE
20221010_MS_zenoSWATH_DC24_VACV_57C_r1.wiff	57C_r1	KNYLFNAI	8	C47H71N11O12	KNYLFNAI	KNYLFNAI	KNYLFNAI	KNYLFNAI	0.9301	0.9543	#N/A	28.76+/-1.45	0	981.528	2	491.771	#N/A	29.1	43398	14451	28947	0	0	0	#N/A	0.000171	VACV			FALSE
20221010_MS_zenoSWATH_DC24_VACV_57C_r2.wiff	57C_r2	KNYLFNAI	8	C47H71N11O12	KNYLFNAI	KNYLFNAI	KNYLFNAI	KNYLFNAI	0.91	0.9067	#N/A	28.76+/-1.45	0.0003	981.528	2	491.771	#N/A	29.1	19954	8334	11620	0	0	0	#N/A	0.000108	VACV			FALSE
20221010_MS_zenoSWATH_DC24_VACV_57C_r3.wiff	57C_r3	KNYLFNAI	8	C47H71N11O12	KNYLFNAI	KNYLFNAI	KNYLFNAI	KNYLFNAI	0.9327	0.9345	#N/A	28.76+/-1.45	0	981.528	2	491.771	#N/A	29.1	23544	7708	15836	0	0	0	#N/A	9.7e-05	VACV			FALSE
20221010_MS_zenoSWATH_DC24_VACV_61C_r1.wiff	61C_r1	KNYLFNAI	8	C47H71N11O12	KNYLFNAI	KNYLFNAI	KNYLFNAI	KNYLFNAI	0.8525	0.9975	#N/A	28.76+/-1.45	0.0161	981.528	2	491.771	#N/A	29.1	5862	2537	3324	0	0	0	#N/A	1.5e-05	VACV			FALSE
20221010_MS_zenoSWATH_DC24_VACV_61C_r2.wiff	61C_r2	KNYLFNAI	8	C47H71N11O12	KNYLFNAI	KNYLFNAI	KNYLFNAI	KNYLFNAI	0.666	0.9217	#N/A	28.76+/-1.45	0.0573	981.528	2	491.771	#N/A	29.1	2471	1657	814	226	226	0	#N/A	7e-06	VACV			FALSE
20221010_MS_zenoSWATH_DC24_VACV_61C_r3.wiff	61C_r3	KNYLFNAI	8	C47H71N11O12	KNYLFNAI	KNYLFNAI	KNYLFNAI	KNYLFNAI	0.2604	0.6237	#N/A	28.76+/-1.45	0.1321	981.528	2	491.771	#N/A	29.1	1047	479	568	15	15	0	#N/A	4e-06	VACV			FALSE
20221010_MS_zenoSWATH_DC24_VACV_65C_r1.wiff	65C_r1	KNYLFNAI	8	C47H71N11O12	KNYLFNAI	KNYLFNAI	KNYLFNAI	KNYLFNAI	0.4282	0.6956	#N/A	28.76+/-1.45	0.0858	981.528	2	491.771	#N/A	29.1	1979	1159	820	0	0	0	#N/A	6e-06	VACV			FALSE
20221010_MS_zenoSWATH_DC24_VACV_65C_r2.wiff	65C_r2	KNYLFNAI	8	C47H71N11O12	KNYLFNAI	KNYLFNAI	KNYLFNAI	KNYLFNAI	0.2063	0.3311	#N/A	28.76+/-1.45	0.3621	981.528	2	491.771	#N/A	29.1	737	195	542	75	75	0	#N/A	5e-06	VACV			FALSE
20221010_MS_zenoSWATH_DC24_VACV_65C_r3.wiff	65C_r3	KNYLFNAI	8	C47H71N11O12	KNYLFNAI	KNYLFNAI	KNYLFNAI	KNYLFNAI	0.4891	0.672	#N/A	28.76+/-1.45	0.1347	981.528	2	491.771	#N/A	29.1	891	566	326	191	191	0	#N/A	3e-06	VACV			FALSE
20221010_MS_zenoSWATH_DC24_VACV_69C_r1.wiff	69C_r1	KNYLFNAI	8	C47H71N11O12	KNYLFNAI	KNYLFNAI	KNYLFNAI	KNYLFNAI	0.5217	0.7743	#N/A	28.76+/-1.45	0.1491	981.528	2	491.771	#N/A	29.1	2721	886	1835	119	119	0	#N/A	1.1e-05	VACV			FALSE
20221010_MS_zenoSWATH_DC24_VACV_69C_r2.wiff	69C_r2	KNYLFNAI	8	C47H71N11O12	KNYLFNAI	KNYLFNAI	KNYLFNAI	KNYLFNAI	0.5246	0.8584	#N/A	28.76+/-1.45	0.2511	981.528	2	491.771	#N/A	29.1	7982	2069	5914	1641	1641	0	#N/A	3e-05	VACV			FALSE
20221010_MS_zenoSWATH_DC24_VACV_69C_r3.wiff	69C_r3	KNYLFNAI	8	C47H71N11O12	KNYLFNAI	KNYLFNAI	KNYLFNAI	KNYLFNAI	0.2745	0.7494	#N/A	28.76+/-1.45	0.3769	981.528	2	491.771	#N/A	29.1	620	339	282	0	0	0	#N/A	5e-06	VACV			FALSE
20221010_MS_zenoSWATH_DC24_VACV_73C_r1.wiff	73C_r1	KNYLFNAI	8	C47H71N11O12	KNYLFNAI	KNYLFNAI	KNYLFNAI	KNYLFNAI	0.421	0.6081	#N/A	28.76+/-1.45	0.3411	981.528	2	491.771	#N/A	29.1	602	444	158	0	0	0	#N/A	4e-06	VACV			FALSE
20221010_MS_zenoSWATH_DC24_VACV_73C_r2.wiff	73C_r2	KNYLFNAI	8	C47H71N11O12	KNYLFNAI	KNYLFNAI	KNYLFNAI	KNYLFNAI	0.5107	0.8068	#N/A	28.76+/-1.45	0.0527	981.528	2	491.771	#N/A	29.1	5136	536	4601	0	0	0	#N/A	4.2e-05	VACV			FALSE
20221010_MS_zenoSWATH_DC24_VACV_73C_r3.wiff	73C_r3	KNYLFNAI	8	C47H71N11O12	KNYLFNAI	KNYLFNAI	KNYLFNAI	KNYLFNAI	0.5919	0.7787	#N/A	28.76+/-1.45	0.0194	981.528	2	491.771	#N/A	29.1	3899	261	3638	122	122	0	#N/A	1.4e-05	VACV			FALSE
20221010_MS_zenoSWATH_DC24_VACV_37C_r1.wiff	37C_r1	DLFPSFVRL	9	C53H80N12O13	DLFPSFVRL	DLFPSFVRL	DLFPSFVRL	DLFPSFVRL	0.976	0.9916	#N/A	41.79+/-1.23	0	1092.6	2	547.306	#N/A	41.96	1825945	383110	1442835	9193	1208	7985	#N/A	0.00194	VACV			FALSE
20221010_MS_zenoSWATH_DC24_VACV_37C_r2.wiff	37C_r2	DLFPSFVRL	9	C53H80N12O13	DLFPSFVRL	DLFPSFVRL	DLFPSFVRL	DLFPSFVRL	0.971	0.9958	#N/A	41.79+/-1.23	0	1092.6	2	547.306	#N/A	41.96	1097731	226465	871266	4916	923	3993	#N/A	0.001724	VACV			FALSE
20221010_MS_zenoSWATH_DC24_VACV_37C_r3.wiff	37C_r3	DLFPSFVRL	9	C53H80N12O13	DLFPSFVRL	DLFPSFVRL	DLFPSFVRL	DLFPSFVRL	0.9772	0.9881	#N/A	41.79+/-1.23	0	1092.6	2	547.306	#N/A	41.96	1522911	295829	1227082	14364	1757	12607	#N/A	0.001992	VACV			FALSE
20221010_MS_zenoSWATH_DC24_VACV_41C_r1.wiff	41C_r1	DLFPSFVRL	9	C53H80N12O13	DLFPSFVRL	DLFPSFVRL	DLFPSFVRL	DLFPSFVRL	0.9741	0.9931	#N/A	41.79+/-1.23	0	1092.6	2	547.306	#N/A	41.96	521987	107438	414549	2733	680	2053	#N/A	0.000636	VACV			FALSE
20221010_MS_zenoSWATH_DC24_VACV_41C_r2.wiff	41C_r2	DLFPSFVRL	9	C53H80N12O13	DLFPSFVRL	DLFPSFVRL	DLFPSFVRL	DLFPSFVRL	0.9791	0.9925	#N/A	41.79+/-1.23	0	1092.6	2	547.306	#N/A	41.96	951934	200451	751483	8398	948	7451	#N/A	0.001365	VACV			FALSE
20221010_MS_zenoSWATH_DC24_VACV_41C_r3.wiff	41C_r3	DLFPSFVRL	9	C53H80N12O13	DLFPSFVRL	DLFPSFVRL	DLFPSFVRL	DLFPSFVRL	0.9729	0.9962	#N/A	41.79+/-1.23	0	1092.6	2	547.306	#N/A	41.96	1450751	273322	1177429	9052	2886	6166	#N/A	0.002048	VACV			FALSE
20221010_MS_zenoSWATH_DC24_VACV_45C_r1.wiff	45C_r1	DLFPSFVRL	9	C53H80N12O13	DLFPSFVRL	DLFPSFVRL	DLFPSFVRL	DLFPSFVRL	0.9781	0.9939	#N/A	41.79+/-1.23	0	1092.6	2	547.306	#N/A	41.96	1555827	310638	1245189	7286	974	6313	#N/A	0.001702	VACV			FALSE
20221010_MS_zenoSWATH_DC24_VACV_45C_r2.wiff	45C_r2	DLFPSFVRL	9	C53H80N12O13	DLFPSFVRL	DLFPSFVRL	DLFPSFVRL	DLFPSFVRL	0.9777	0.9956	#N/A	41.79+/-1.23	0	1092.6	2	547.306	#N/A	41.96	1045400	210293	835106	360	360	0	#N/A	0.001814	VACV			FALSE
20221010_MS_zenoSWATH_DC24_VACV_45C_r3.wiff	45C_r3	DLFPSFVRL	9	C53H80N12O13	DLFPSFVRL	DLFPSFVRL	DLFPSFVRL	DLFPSFVRL	0.9774	0.9917	#N/A	41.79+/-1.23	0	1092.6	2	547.306	#N/A	41.96	1755152	353680	1401472	11351	1142	10210	#N/A	0.002024	VACV			FALSE
20221010_MS_zenoSWATH_DC24_VACV_49C_r1.wiff	49C_r1	DLFPSFVRL	9	C53H80N12O13	DLFPSFVRL	DLFPSFVRL	DLFPSFVRL	DLFPSFVRL	0.9733	0.9926	#N/A	41.79+/-1.23	0	1092.6	2	547.306	#N/A	41.96	595814	130534	465281	7449	2582	4868	#N/A	0.001253	VACV			FALSE
20221010_MS_zenoSWATH_DC24_VACV_49C_r2.wiff	49C_r2	DLFPSFVRL	9	C53H80N12O13	DLFPSFVRL	DLFPSFVRL	DLFPSFVRL	DLFPSFVRL	0.9749	0.9941	#N/A	41.79+/-1.23	0	1092.6	2	547.306	#N/A	41.96	793964	159252	634712	8338	2308	6030	#N/A	0.001279	VACV			FALSE
20221010_MS_zenoSWATH_DC24_VACV_49C_r3.wiff	49C_r3	DLFPSFVRL	9	C53H80N12O13	DLFPSFVRL	DLFPSFVRL	DLFPSFVRL	DLFPSFVRL	0.9736	0.9904	#N/A	41.79+/-1.23	0	1092.6	2	547.306	#N/A	41.96	337416	69743	267673	473	473	0	#N/A	0.000764	VACV			FALSE
20221010_MS_zenoSWATH_DC24_VACV_53C_r1.wiff	53C_r1	DLFPSFVRL	9	C53H80N12O13	DLFPSFVRL	DLFPSFVRL	DLFPSFVRL	DLFPSFVRL	0.9676	0.9973	#N/A	41.79+/-1.23	0	1092.6	2	547.306	#N/A	41.96	429224	86537	342687	993	215	778	#N/A	0.000808	VACV			FALSE
20221010_MS_zenoSWATH_DC24_VACV_53C_r2.wiff	53C_r2	DLFPSFVRL	9	C53H80N12O13	DLFPSFVRL	DLFPSFVRL	DLFPSFVRL	DLFPSFVRL	0.9422	0.9776	#N/A	41.79+/-1.23	0	1092.6	2	547.306	#N/A	41.96	39781	9838	29943	0	0	0	#N/A	9.5e-05	VACV			FALSE
20221010_MS_zenoSWATH_DC24_VACV_53C_r3.wiff	53C_r3	DLFPSFVRL	9	C53H80N12O13	DLFPSFVRL	DLFPSFVRL	DLFPSFVRL	DLFPSFVRL	0.9599	0.9952	#N/A	41.79+/-1.23	0	1092.6	2	547.306	#N/A	41.96	158781	31790	126992	46	46	0	#N/A	0.000543	VACV			FALSE
20221010_MS_zenoSWATH_DC24_VACV_57C_r1.wiff	57C_r1	DLFPSFVRL	9	C53H80N12O13	DLFPSFVRL	DLFPSFVRL	DLFPSFVRL	DLFPSFVRL	0.925	0.9211	#N/A	41.79+/-1.23	0	1092.6	2	547.306	#N/A	41.96	29950	7841	22109	0	0	0	#N/A	0.000118	VACV			FALSE
20221010_MS_zenoSWATH_DC24_VACV_57C_r2.wiff	57C_r2	DLFPSFVRL	9	C53H80N12O13	DLFPSFVRL	DLFPSFVRL	DLFPSFVRL	DLFPSFVRL	0.6842	0.7498	#N/A	41.79+/-1.23	0.2914	1092.6	2	547.306	#N/A	41.96	891	268	623	66	66	0	#N/A	5e-06	VACV			FALSE
20221010_MS_zenoSWATH_DC24_VACV_57C_r3.wiff	57C_r3	DLFPSFVRL	9	C53H80N12O13	DLFPSFVRL	DLFPSFVRL	DLFPSFVRL	DLFPSFVRL	0.9148	0.9191	#N/A	41.79+/-1.23	0.0128	1092.6	2	547.306	#N/A	41.96	9999	4022	5976	0	0	0	#N/A	4.1e-05	VACV			FALSE
20221010_MS_zenoSWATH_DC24_VACV_61C_r1.wiff	61C_r1	DLFPSFVRL	9	C53H80N12O13	DLFPSFVRL	DLFPSFVRL	DLFPSFVRL	DLFPSFVRL	0.5701	0.7685	#N/A	41.79+/-1.23	0.0679	1092.6	2	547.306	#N/A	41.96	3091	1517	1574	109	109	0	#N/A	8e-06	VACV			FALSE
20221010_MS_zenoSWATH_DC24_VACV_61C_r2.wiff	61C_r2	DLFPSFVRL	9	C53H80N12O13	DLFPSFVRL	DLFPSFVRL	DLFPSFVRL	DLFPSFVRL	0.5716	0.5827	#N/A	41.79+/-1.23	0.2819	1092.6	2	547.306	#N/A	41.96	1629	739	890	148	148	0	#N/A	5e-06	VACV			FALSE
20221010_MS_zenoSWATH_DC24_VACV_61C_r3.wiff	61C_r3	DLFPSFVRL	9	C53H80N12O13	DLFPSFVRL	DLFPSFVRL	DLFPSFVRL	DLFPSFVRL	0.6443	0.7929	#N/A	41.79+/-1.23	0.1084	1092.6	2	547.306	#N/A	41.96	8141	5260	2880	0	0	0	#N/A	2.7e-05	VACV			FALSE
20221010_MS_zenoSWATH_DC24_VACV_65C_r1.wiff	65C_r1	DLFPSFVRL	9	C53H80N12O13	DLFPSFVRL	DLFPSFVRL	DLFPSFVRL	DLFPSFVRL	0.7088	0.3983	#N/A	41.79+/-1.23	0.1315	1092.6	2	547.306	#N/A	41.96	963	28	935	0	0	0	#N/A	3e-06	VACV			FALSE
20221010_MS_zenoSWATH_DC24_VACV_65C_r2.wiff	65C_r2	DLFPSFVRL	9	C53H80N12O13	DLFPSFVRL	DLFPSFVRL	DLFPSFVRL	DLFPSFVRL	0.6064	0.5221	#N/A	41.79+/-1.23	0.279	1092.6	2	547.306	#N/A	41.96	208	2	205	0	0	0	#N/A	1e-06	VACV			FALSE
20221010_MS_zenoSWATH_DC24_VACV_65C_r3.wiff	65C_r3	DLFPSFVRL	9	C53H80N12O13	DLFPSFVRL	DLFPSFVRL	DLFPSFVRL	DLFPSFVRL	0.5761	0.3983	#N/A	41.79+/-1.23	0.121	1092.6	2	547.306	#N/A	41.96	707	45	662	0	0	0	#N/A	2e-06	VACV			FALSE
20221010_MS_zenoSWATH_DC24_VACV_69C_r1.wiff	69C_r1	DLFPSFVRL	9	C53H80N12O13	DLFPSFVRL	DLFPSFVRL	DLFPSFVRL	DLFPSFVRL	0.6796	0.382	#N/A	41.79+/-1.23	0.0647	1092.6	2	547.306	#N/A	41.96	4340	518	3823	341	341	0	#N/A	1.7e-05	VACV			FALSE
20221010_MS_zenoSWATH_DC24_VACV_69C_r2.wiff	69C_r2	DLFPSFVRL	9	C53H80N12O13	DLFPSFVRL	DLFPSFVRL	DLFPSFVRL	DLFPSFVRL	0.7803	0.7555	#N/A	41.79+/-1.23	0.0944	1092.6	2	547.306	#N/A	41.96	6076	2256	3820	0	0	0	#N/A	2.3e-05	VACV			FALSE
20221010_MS_zenoSWATH_DC24_VACV_69C_r3.wiff	69C_r3	DLFPSFVRL	9	C53H80N12O13	DLFPSFVRL	DLFPSFVRL	DLFPSFVRL	DLFPSFVRL	0.6424	0.7521	#N/A	41.79+/-1.23	0.217	1092.6	2	547.306	#N/A	41.96	893	157	736	15	15	0	#N/A	8e-06	VACV			FALSE
20221010_MS_zenoSWATH_DC24_VACV_73C_r1.wiff	73C_r1	DLFPSFVRL	9	C53H80N12O13	DLFPSFVRL	DLFPSFVRL	DLFPSFVRL	DLFPSFVRL	0.5571	0.2276	#N/A	41.79+/-1.23	0.1352	1092.6	2	547.306	#N/A	41.96	951	443	508	0	0	0	#N/A	6e-06	VACV			FALSE
20221010_MS_zenoSWATH_DC24_VACV_73C_r2.wiff	73C_r2	DLFPSFVRL	9	C53H80N12O13	DLFPSFVRL	DLFPSFVRL	DLFPSFVRL	DLFPSFVRL	0.7742	0.4745	#N/A	41.79+/-1.23	0.0265	1092.6	2	547.306	#N/A	41.96	3230	1166	2064	0	0	0	#N/A	2.6e-05	VACV			FALSE
20221010_MS_zenoSWATH_DC24_VACV_73C_r3.wiff	73C_r3	DLFPSFVRL	9	C53H80N12O13	DLFPSFVRL	DLFPSFVRL	DLFPSFVRL	DLFPSFVRL	0.7156	0.3042	#N/A	41.79+/-1.23	0.0047	1092.6	2	547.306	#N/A	41.96	13514	7767	5746	416	416	0	#N/A	5e-05	VACV			FALSE
20221010_MS_zenoSWATH_DC24_VACV_37C_r1.wiff	37C_r1	YAHINALEYI	10	C57H83N13O16	YAHINALEYI	YAHINALEYI	YAHINALEYI	YAHINALEYI	0.9503	0.998	#N/A	32.07+/-0.46	0	1205.61	2	603.811	#N/A	32.02	9077063	3387271	5689793	76342	21132	55210	#N/A	0.009643	VACV			FALSE
20221010_MS_zenoSWATH_DC24_VACV_37C_r2.wiff	37C_r2	YAHINALEYI	10	C57H83N13O16	YAHINALEYI	YAHINALEYI	YAHINALEYI	YAHINALEYI	0.9622	0.9979	#N/A	32.07+/-0.46	0	1205.61	2	603.811	#N/A	32.02	6194085	2202428	3991656	36226	10582	25644	#N/A	0.009725	VACV			FALSE
20221010_MS_zenoSWATH_DC24_VACV_37C_r3.wiff	37C_r3	YAHINALEYI	10	C57H83N13O16	YAHINALEYI	YAHINALEYI	YAHINALEYI	YAHINALEYI	0.9627	0.9976	#N/A	32.07+/-0.46	0	1205.61	2	603.811	#N/A	32.02	7691637	2771800	4919837	36511	11950	24561	#N/A	0.010062	VACV			FALSE
20221010_MS_zenoSWATH_DC24_VACV_41C_r1.wiff	41C_r1	YAHINALEYI	10	C57H83N13O16	YAHINALEYI	YAHINALEYI	YAHINALEYI	YAHINALEYI	0.9641	0.9957	#N/A	32.07+/-0.46	0	1205.61	2	603.811	#N/A	32.02	5683354	2021053	3662300	59037	19885	39152	#N/A	0.006928	VACV			FALSE
20221010_MS_zenoSWATH_DC24_VACV_41C_r2.wiff	41C_r2	YAHINALEYI	10	C57H83N13O16	YAHINALEYI	YAHINALEYI	YAHINALEYI	YAHINALEYI	0.9602	0.996	#N/A	32.07+/-0.46	0	1205.61	2	603.811	#N/A	32.02	6578783	2389755	4189028	71710	23327	48383	#N/A	0.009432	VACV			FALSE
20221010_MS_zenoSWATH_DC24_VACV_41C_r3.wiff	41C_r3	YAHINALEYI	10	C57H83N13O16	YAHINALEYI	YAHINALEYI	YAHINALEYI	YAHINALEYI	0.9624	0.9967	#N/A	32.07+/-0.46	0	1205.61	2	603.811	#N/A	32.02	7304772	2694707	4610065	61634	24529	37105	#N/A	0.010311	VACV			FALSE
20221010_MS_zenoSWATH_DC24_VACV_45C_r1.wiff	45C_r1	YAHINALEYI	10	C57H83N13O16	YAHINALEYI	YAHINALEYI	YAHINALEYI	YAHINALEYI	0.9537	0.9976	#N/A	32.07+/-0.46	0	1205.61	2	603.811	#N/A	32.02	8609923	3192643	5417281	111934	38115	73819	#N/A	0.009417	VACV			FALSE
20221010_MS_zenoSWATH_DC24_VACV_45C_r2.wiff	45C_r2	YAHINALEYI	10	C57H83N13O16	YAHINALEYI	YAHINALEYI	YAHINALEYI	YAHINALEYI	0.9652	0.9983	#N/A	32.07+/-0.46	0	1205.61	2	603.811	#N/A	32.02	5757941	2026107	3731834	38546	12150	26396	#N/A	0.009993	VACV			FALSE
20221010_MS_zenoSWATH_DC24_VACV_45C_r3.wiff	45C_r3	YAHINALEYI	10	C57H83N13O16	YAHINALEYI	YAHINALEYI	YAHINALEYI	YAHINALEYI	0.9541	0.9956	#N/A	32.07+/-0.46	0	1205.61	2	603.811	#N/A	32.02	8960949	3248921	5712028	65017	23007	42010	#N/A	0.010333	VACV			FALSE
20221010_MS_zenoSWATH_DC24_VACV_49C_r1.wiff	49C_r1	YAHINALEYI	10	C57H83N13O16	YAHINALEYI	YAHINALEYI	YAHINALEYI	YAHINALEYI	0.9639	0.9978	#N/A	32.07+/-0.46	0	1205.61	2	603.811	#N/A	32.02	2607034	890200	1716833	26787	9493	17294	#N/A	0.005485	VACV			FALSE
20221010_MS_zenoSWATH_DC24_VACV_49C_r2.wiff	49C_r2	YAHINALEYI	10	C57H83N13O16	YAHINALEYI	YAHINALEYI	YAHINALEYI	YAHINALEYI	0.9614	0.9994	#N/A	32.07+/-0.46	0	1205.61	2	603.811	#N/A	32.02	6522250	2312697	4209553	56876	18184	38692	#N/A	0.010508	VACV			FALSE
20221010_MS_zenoSWATH_DC24_VACV_49C_r3.wiff	49C_r3	YAHINALEYI	10	C57H83N13O16	YAHINALEYI	YAHINALEYI	YAHINALEYI	YAHINALEYI	0.9604	0.9964	#N/A	32.07+/-0.46	0	1205.61	2	603.811	#N/A	32.02	3885815	1319547	2566268	22933	8708	14225	#N/A	0.008801	VACV			FALSE
20221010_MS_zenoSWATH_DC24_VACV_53C_r1.wiff	53C_r1	YAHINALEYI	10	C57H83N13O16	YAHINALEYI	YAHINALEYI	YAHINALEYI	YAHINALEYI	0.9585	0.9986	#N/A	32.07+/-0.46	0	1205.61	2	603.811	#N/A	32.02	7287961	2677782	4610180	69880	23987	45893	#N/A	0.013723	VACV			FALSE
20221010_MS_zenoSWATH_DC24_VACV_53C_r2.wiff	53C_r2	YAHINALEYI	10	C57H83N13O16	YAHINALEYI	YAHINALEYI	YAHINALEYI	YAHINALEYI	0.9607	0.9956	#N/A	32.07+/-0.46	0	1205.61	2	603.811	#N/A	32.02	2273166	761348	1511817	18803	4776	14027	#N/A	0.005455	VACV			FALSE
20221010_MS_zenoSWATH_DC24_VACV_53C_r3.wiff	53C_r3	YAHINALEYI	10	C57H83N13O16	YAHINALEYI	YAHINALEYI	YAHINALEYI	YAHINALEYI	0.9655	0.9987	#N/A	32.07+/-0.46	0	1205.61	2	603.811	#N/A	32.02	3370866	1141873	2228993	22772	11831	10940	#N/A	0.01153	VACV			FALSE
20221010_MS_zenoSWATH_DC24_VACV_57C_r1.wiff	57C_r1	YAHINALEYI	10	C57H83N13O16	YAHINALEYI	YAHINALEYI	YAHINALEYI	YAHINALEYI	0.9621	0.9976	#N/A	32.07+/-0.46	0	1205.61	2	603.811	#N/A	32.02	2529754	853084	1676670	30245	12379	17866	#N/A	0.009962	VACV			FALSE
20221010_MS_zenoSWATH_DC24_VACV_57C_r2.wiff	57C_r2	YAHINALEYI	10	C57H83N13O16	YAHINALEYI	YAHINALEYI	YAHINALEYI	YAHINALEYI	0.9595	0.999	#N/A	32.07+/-0.46	0	1205.61	2	603.811	#N/A	32.02	1840854	622055	1218799	18171	7499	10672	#N/A	0.009951	VACV			FALSE
20221010_MS_zenoSWATH_DC24_VACV_57C_r3.wiff	57C_r3	YAHINALEYI	10	C57H83N13O16	YAHINALEYI	YAHINALEYI	YAHINALEYI	YAHINALEYI	0.9662	0.9978	#N/A	32.07+/-0.46	0	1205.61	2	603.811	#N/A	32.02	1316699	455973	860726	4005	580	3425	#N/A	0.005418	VACV			FALSE
20221010_MS_zenoSWATH_DC24_VACV_61C_r1.wiff	61C_r1	YAHINALEYI	10	C57H83N13O16	YAHINALEYI	YAHINALEYI	YAHINALEYI	YAHINALEYI	0.9659	0.9831	#N/A	32.07+/-0.46	0	1205.61	2	603.811	#N/A	32.02	647123	217331	429792	13629	7304	6325	#N/A	0.001638	VACV			FALSE
20221010_MS_zenoSWATH_DC24_VACV_61C_r2.wiff	61C_r2	YAHINALEYI	10	C57H83N13O16	YAHINALEYI	YAHINALEYI	YAHINALEYI	YAHINALEYI	0.9532	0.9924	#N/A	32.07+/-0.46	0	1205.61	2	603.811	#N/A	32.02	537018	181361	355658	5436	4701	734	#N/A	0.001604	VACV			FALSE
20221010_MS_zenoSWATH_DC24_VACV_61C_r3.wiff	61C_r3	YAHINALEYI	10	C57H83N13O16	YAHINALEYI	YAHINALEYI	YAHINALEYI	YAHINALEYI	0.9585	0.9935	#N/A	32.07+/-0.46	0	1205.61	2	603.811	#N/A	32.02	424634	139161	285473	13917	10588	3330	#N/A	0.001434	VACV			FALSE
20221010_MS_zenoSWATH_DC24_VACV_65C_r1.wiff	65C_r1	YAHINALEYI	10	C57H83N13O16	YAHINALEYI	YAHINALEYI	YAHINALEYI	YAHINALEYI	0.4956	0.7186	#N/A	32.07+/-0.46	0.1325	1205.61	2	603.811	#N/A	32.02	4284	1271	3013	286	286	0	#N/A	1.4e-05	VACV			FALSE
20221010_MS_zenoSWATH_DC24_VACV_65C_r2.wiff	65C_r2	YAHINALEYI	10	C57H83N13O16	YAHINALEYI	YAHINALEYI	YAHINALEYI	YAHINALEYI	0.1362	0.7558	#N/A	32.07+/-0.46	0.2677	1205.61	2	603.811	#N/A	32.02	552	2	550	0	0	0	#N/A	4e-06	VACV			FALSE
20221010_MS_zenoSWATH_DC24_VACV_65C_r3.wiff	65C_r3	YAHINALEYI	10	C57H83N13O16	YAHINALEYI	YAHINALEYI	YAHINALEYI	YAHINALEYI	0.9229	0.8054	#N/A	32.07+/-0.46	0.0021	1205.61	2	603.811	#N/A	32.02	7719	4088	3631	669	669	0	#N/A	2.4e-05	VACV			FALSE
20221010_MS_zenoSWATH_DC24_VACV_69C_r1.wiff	69C_r1	YAHINALEYI	10	C57H83N13O16	YAHINALEYI	YAHINALEYI	YAHINALEYI	YAHINALEYI	0.2883	0.7657	#N/A	32.07+/-0.46	0.1138	1205.61	2	603.811	#N/A	32.02	1233	569	664	0	0	0	#N/A	5e-06	VACV			FALSE
20221010_MS_zenoSWATH_DC24_VACV_69C_r2.wiff	69C_r2	YAHINALEYI	10	C57H83N13O16	YAHINALEYI	YAHINALEYI	YAHINALEYI	YAHINALEYI	0.9075	0.8725	#N/A	32.07+/-0.46	0.0028	1205.61	2	603.811	#N/A	32.02	33451	13033	20418	1110	1110	0	#N/A	0.000125	VACV			FALSE
20221010_MS_zenoSWATH_DC24_VACV_69C_r3.wiff	69C_r3	YAHINALEYI	10	C57H83N13O16	YAHINALEYI	YAHINALEYI	YAHINALEYI	YAHINALEYI	0.8922	0.8338	#N/A	32.07+/-0.46	0.0061	1205.61	2	603.811	#N/A	32.02	10549	4857	5692	0	0	0	#N/A	9.1e-05	VACV			FALSE
20221010_MS_zenoSWATH_DC24_VACV_73C_r1.wiff	73C_r1	YAHINALEYI	10	C57H83N13O16	YAHINALEYI	YAHINALEYI	YAHINALEYI	YAHINALEYI	0.7089	0.7239	#N/A	32.07+/-0.46	0.0896	1205.61	2	603.811	#N/A	32.02	3706	1787	1919	284	284	0	#N/A	2.3e-05	VACV			FALSE
20221010_MS_zenoSWATH_DC24_VACV_73C_r2.wiff	73C_r2	YAHINALEYI	10	C57H83N13O16	YAHINALEYI	YAHINALEYI	YAHINALEYI	YAHINALEYI	0.8836	0.6299	#N/A	32.07+/-0.46	0.0109	1205.61	2	603.811	#N/A	32.02	12260	5248	7012	0	0	0	#N/A	9.9e-05	VACV			FALSE
20221010_MS_zenoSWATH_DC24_VACV_73C_r3.wiff	73C_r3	YAHINALEYI	10	C57H83N13O16	YAHINALEYI	YAHINALEYI	YAHINALEYI	YAHINALEYI	0.8963	0.5352	#N/A	32.07+/-0.46	0.0002	1205.61	2	603.811	#N/A	32.02	15347	8057	7289	3010	1967	1042	#N/A	5.7e-05	VACV			FALSE
20221010_MS_zenoSWATH_DC24_VACV_37C_r1.wiff	37C_r1	YAHINALEYI	10	C57H82N12O17	YAHIN[+1]ALEYI	YAHIN(unimod:7)ALEYI	YAHIN[Dea]ALEYI	YAHIN[Deamidated (NQ)]ALEYI	0.9142	0.763	#N/A	32.14+/-0.42	0	1206.59	2	604.303	#N/A	32	3400199	59864	3340336	22330	0	22330	#N/A	0.003612	VACV			FALSE
20221010_MS_zenoSWATH_DC24_VACV_37C_r2.wiff	37C_r2	YAHINALEYI	10	C57H82N12O17	YAHIN[+1]ALEYI	YAHIN(unimod:7)ALEYI	YAHIN[Dea]ALEYI	YAHIN[Deamidated (NQ)]ALEYI	0.9131	0.4048	#N/A	32.14+/-0.42	0	1206.59	2	604.303	#N/A	32	2195567	6196	2189371	20240	0	20240	#N/A	0.003447	VACV			FALSE
20221010_MS_zenoSWATH_DC24_VACV_37C_r3.wiff	37C_r3	YAHINALEYI	10	C57H82N12O17	YAHIN[+1]ALEYI	YAHIN(unimod:7)ALEYI	YAHIN[Dea]ALEYI	YAHIN[Deamidated (NQ)]ALEYI	0.9128	0.6845	#N/A	32.14+/-0.42	0	1206.59	2	604.303	#N/A	32	2966020	184610	2781410	23006	483	22523	#N/A	0.00388	VACV			FALSE
20221010_MS_zenoSWATH_DC24_VACV_41C_r1.wiff	41C_r1	YAHINALEYI	10	C57H82N12O17	YAHIN[+1]ALEYI	YAHIN(unimod:7)ALEYI	YAHIN[Dea]ALEYI	YAHIN[Deamidated (NQ)]ALEYI	0.9139	0.8896	#N/A	32.14+/-0.42	0	1206.59	2	604.303	#N/A	32	2342017	282906	2059110	7636	0	7636	#N/A	0.002855	VACV			FALSE
20221010_MS_zenoSWATH_DC24_VACV_41C_r2.wiff	41C_r2	YAHINALEYI	10	C57H82N12O17	YAHIN[+1]ALEYI	YAHIN(unimod:7)ALEYI	YAHIN[Dea]ALEYI	YAHIN[Deamidated (NQ)]ALEYI	0.881	0.4511	#N/A	32.14+/-0.42	0	1206.59	2	604.303	#N/A	32	2280227	5610	2274617	22443	550	21893	#N/A	0.003269	VACV			FALSE
20221010_MS_zenoSWATH_DC24_VACV_41C_r3.wiff	41C_r3	YAHINALEYI	10	C57H82N12O17	YAHIN[+1]ALEYI	YAHIN(unimod:7)ALEYI	YAHIN[Dea]ALEYI	YAHIN[Deamidated (NQ)]ALEYI	0.9105	0.2983	#N/A	32.14+/-0.42	0	1206.59	2	604.303	#N/A	32	2658023	48983	2609040	19188	0	19188	#N/A	0.003752	VACV			FALSE
20221010_MS_zenoSWATH_DC24_VACV_45C_r1.wiff	45C_r1	YAHINALEYI	10	C57H82N12O17	YAHIN[+1]ALEYI	YAHIN(unimod:7)ALEYI	YAHIN[Dea]ALEYI	YAHIN[Deamidated (NQ)]ALEYI	0.8989	0.7811	#N/A	32.14+/-0.42	0	1206.59	2	604.303	#N/A	32	3156532	38190	3118342	52838	0	52838	#N/A	0.003452	VACV			FALSE
20221010_MS_zenoSWATH_DC24_VACV_45C_r2.wiff	45C_r2	YAHINALEYI	10	C57H82N12O17	YAHIN[+1]ALEYI	YAHIN(unimod:7)ALEYI	YAHIN[Dea]ALEYI	YAHIN[Deamidated (NQ)]ALEYI	0.9044	0.6658	#N/A	32.14+/-0.42	0	1206.59	2	604.303	#N/A	32	2070332	655	2069676	4929	852	4076	#N/A	0.003593	VACV			FALSE
20221010_MS_zenoSWATH_DC24_VACV_45C_r3.wiff	45C_r3	YAHINALEYI	10	C57H82N12O17	YAHIN[+1]ALEYI	YAHIN(unimod:7)ALEYI	YAHIN[Dea]ALEYI	YAHIN[Deamidated (NQ)]ALEYI	0.911	0.2412	#N/A	32.14+/-0.42	0	1206.59	2	604.303	#N/A	32	3285630	46	3285584	36692	0	36692	#N/A	0.003789	VACV			FALSE
20221010_MS_zenoSWATH_DC24_VACV_49C_r1.wiff	49C_r1	YAHINALEYI	10	C57H82N12O17	YAHIN[+1]ALEYI	YAHIN(unimod:7)ALEYI	YAHIN[Dea]ALEYI	YAHIN[Deamidated (NQ)]ALEYI	0.9016	0.592	#N/A	32.14+/-0.42	0	1206.59	2	604.303	#N/A	32	962102	19364	942737	4495	82	4413	#N/A	0.002024	VACV			FALSE
20221010_MS_zenoSWATH_DC24_VACV_49C_r2.wiff	49C_r2	YAHINALEYI	10	C57H82N12O17	YAHIN[+1]ALEYI	YAHIN(unimod:7)ALEYI	YAHIN[Dea]ALEYI	YAHIN[Deamidated (NQ)]ALEYI	0.9217	0.8621	#N/A	32.14+/-0.42	0	1206.59	2	604.303	#N/A	32	2380013	42551	2337461	25483	0	25483	#N/A	0.003835	VACV			FALSE
20221010_MS_zenoSWATH_DC24_VACV_49C_r3.wiff	49C_r3	YAHINALEYI	10	C57H82N12O17	YAHIN[+1]ALEYI	YAHIN(unimod:7)ALEYI	YAHIN[Dea]ALEYI	YAHIN[Deamidated (NQ)]ALEYI	0.9087	0.8112	#N/A	32.14+/-0.42	0	1206.59	2	604.303	#N/A	32	1396189	7321	1388868	17485	267	17217	#N/A	0.003162	VACV			FALSE
20221010_MS_zenoSWATH_DC24_VACV_53C_r1.wiff	53C_r1	YAHINALEYI	10	C57H82N12O17	YAHIN[+1]ALEYI	YAHIN(unimod:7)ALEYI	YAHIN[Dea]ALEYI	YAHIN[Deamidated (NQ)]ALEYI	0.9191	0.5894	#N/A	32.14+/-0.42	0	1206.59	2	604.303	#N/A	32	2703134	5850	2697285	12105	0	12105	#N/A	0.00509	VACV			FALSE
20221010_MS_zenoSWATH_DC24_VACV_53C_r2.wiff	53C_r2	YAHINALEYI	10	C57H82N12O17	YAHIN[+1]ALEYI	YAHIN(unimod:7)ALEYI	YAHIN[Dea]ALEYI	YAHIN[Deamidated (NQ)]ALEYI	0.8854	0.7724	#N/A	32.14+/-0.42	0.0001	1206.59	2	604.303	#N/A	32	839296	16658	822638	2084	73	2010	#N/A	0.002014	VACV			FALSE
20221010_MS_zenoSWATH_DC24_VACV_53C_r3.wiff	53C_r3	YAHINALEYI	10	C57H82N12O17	YAHIN[+1]ALEYI	YAHIN(unimod:7)ALEYI	YAHIN[Dea]ALEYI	YAHIN[Deamidated (NQ)]ALEYI	0.9204	0.4887	#N/A	32.14+/-0.42	0	1206.59	2	604.303	#N/A	32	1221091	19125	1201966	12311	184	12126	#N/A	0.004177	VACV			FALSE
20221010_MS_zenoSWATH_DC24_VACV_57C_r1.wiff	57C_r1	YAHINALEYI	10	C57H82N12O17	YAHIN[+1]ALEYI	YAHIN(unimod:7)ALEYI	YAHIN[Dea]ALEYI	YAHIN[Deamidated (NQ)]ALEYI	0.9158	0.6126	#N/A	32.14+/-0.42	0	1206.59	2	604.303	#N/A	32	952359	18001	934357	4812	0	4812	#N/A	0.00375	VACV			FALSE
20221010_MS_zenoSWATH_DC24_VACV_57C_r2.wiff	57C_r2	YAHINALEYI	10	C57H82N12O17	YAHIN[+1]ALEYI	YAHIN(unimod:7)ALEYI	YAHIN[Dea]ALEYI	YAHIN[Deamidated (NQ)]ALEYI	0.9123	0.8215	#N/A	32.14+/-0.42	0	1206.59	2	604.303	#N/A	32	851001	161282	689719	1100	309	792	#N/A	0.0046	VACV			FALSE
20221010_MS_zenoSWATH_DC24_VACV_57C_r3.wiff	57C_r3	YAHINALEYI	10	C57H82N12O17	YAHIN[+1]ALEYI	YAHIN(unimod:7)ALEYI	YAHIN[Dea]ALEYI	YAHIN[Deamidated (NQ)]ALEYI	0.9119	0.5901	#N/A	32.14+/-0.42	0	1206.59	2	604.303	#N/A	32	480420	19064	461356	2681	0	2681	#N/A	0.001977	VACV			FALSE
20221010_MS_zenoSWATH_DC24_VACV_61C_r1.wiff	61C_r1	YAHINALEYI	10	C57H82N12O17	YAHIN[+1]ALEYI	YAHIN(unimod:7)ALEYI	YAHIN[Dea]ALEYI	YAHIN[Deamidated (NQ)]ALEYI	0.8928	0.6395	#N/A	32.14+/-0.42	0	1206.59	2	604.303	#N/A	32	220126	8561	211565	4016	1883	2133	#N/A	0.000557	VACV			FALSE
20221010_MS_zenoSWATH_DC24_VACV_61C_r2.wiff	61C_r2	YAHINALEYI	10	C57H82N12O17	YAHIN[+1]ALEYI	YAHIN(unimod:7)ALEYI	YAHIN[Dea]ALEYI	YAHIN[Deamidated (NQ)]ALEYI	0.9244	0.9122	#N/A	32.14+/-0.42	0	1206.59	2	604.303	#N/A	32	258845	64601	194244	0	0	0	#N/A	0.000773	VACV			FALSE
20221010_MS_zenoSWATH_DC24_VACV_61C_r3.wiff	61C_r3	YAHINALEYI	10	C57H82N12O17	YAHIN[+1]ALEYI	YAHIN(unimod:7)ALEYI	YAHIN[Dea]ALEYI	YAHIN[Deamidated (NQ)]ALEYI	0.9098	0.871	#N/A	32.14+/-0.42	0	1206.59	2	604.303	#N/A	32	162304	13895	148409	1781	1644	137	#N/A	0.000548	VACV			FALSE
20221010_MS_zenoSWATH_DC24_VACV_65C_r1.wiff	65C_r1	YAHINALEYI	10	C57H82N12O17	YAHIN[+1]ALEYI	YAHIN(unimod:7)ALEYI	YAHIN[Dea]ALEYI	YAHIN[Deamidated (NQ)]ALEYI	0.8481	0.7529	#N/A	32.14+/-0.42	0.0021	1206.59	2	604.303	#N/A	32	8652	4346	4306	0	0	0	#N/A	2.8e-05	VACV			FALSE
20221010_MS_zenoSWATH_DC24_VACV_65C_r2.wiff	65C_r2	YAHINALEYI	10	C57H82N12O17	YAHIN[+1]ALEYI	YAHIN(unimod:7)ALEYI	YAHIN[Dea]ALEYI	YAHIN[Deamidated (NQ)]ALEYI	0.2922	0.7329	#N/A	32.14+/-0.42	0.253	1206.59	2	604.303	#N/A	32	980	453	527	25	25	0	#N/A	7e-06	VACV			FALSE
20221010_MS_zenoSWATH_DC24_VACV_65C_r3.wiff	65C_r3	YAHINALEYI	10	C57H82N12O17	YAHIN[+1]ALEYI	YAHIN(unimod:7)ALEYI	YAHIN[Dea]ALEYI	YAHIN[Deamidated (NQ)]ALEYI	0.2588	0.6698	#N/A	32.14+/-0.42	0.1415	1206.59	2	604.303	#N/A	32	14402	4519	9883	0	0	0	#N/A	4.5e-05	VACV			FALSE
20221010_MS_zenoSWATH_DC24_VACV_69C_r1.wiff	69C_r1	YAHINALEYI	10	C57H82N12O17	YAHIN[+1]ALEYI	YAHIN(unimod:7)ALEYI	YAHIN[Dea]ALEYI	YAHIN[Deamidated (NQ)]ALEYI	0.2945	0.8555	#N/A	32.14+/-0.42	0.0275	1206.59	2	604.303	#N/A	32	5823	2601	3222	1018	807	211	#N/A	2.3e-05	VACV			FALSE
20221010_MS_zenoSWATH_DC24_VACV_69C_r2.wiff	69C_r2	YAHINALEYI	10	C57H82N12O17	YAHIN[+1]ALEYI	YAHIN(unimod:7)ALEYI	YAHIN[Dea]ALEYI	YAHIN[Deamidated (NQ)]ALEYI	0.8023	0.8861	#N/A	32.14+/-0.42	0.0004	1206.59	2	604.303	#N/A	32	9608	2566	7042	0	0	0	#N/A	3.6e-05	VACV			FALSE
20221010_MS_zenoSWATH_DC24_VACV_69C_r3.wiff	69C_r3	YAHINALEYI	10	C57H82N12O17	YAHIN[+1]ALEYI	YAHIN(unimod:7)ALEYI	YAHIN[Dea]ALEYI	YAHIN[Deamidated (NQ)]ALEYI	0.7897	0.9522	#N/A	32.14+/-0.42	0.0016	1206.59	2	604.303	#N/A	32	2423	675	1749	176	176	0	#N/A	2.1e-05	VACV			FALSE
20221010_MS_zenoSWATH_DC24_VACV_73C_r1.wiff	73C_r1	YAHINALEYI	10	C57H82N12O17	YAHIN[+1]ALEYI	YAHIN(unimod:7)ALEYI	YAHIN[Dea]ALEYI	YAHIN[Deamidated (NQ)]ALEYI	0.4979	0.3836	#N/A	32.14+/-0.42	0.2416	1206.59	2	604.303	#N/A	32	716	273	443	154	154	0	#N/A	4e-06	VACV			FALSE
20221010_MS_zenoSWATH_DC24_VACV_73C_r2.wiff	73C_r2	YAHINALEYI	10	C57H82N12O17	YAHIN[+1]ALEYI	YAHIN(unimod:7)ALEYI	YAHIN[Dea]ALEYI	YAHIN[Deamidated (NQ)]ALEYI	0.3864	0.6057	#N/A	32.14+/-0.42	0.1415	1206.59	2	604.303	#N/A	32	2890	1575	1315	0	0	0	#N/A	2.3e-05	VACV			FALSE
20221010_MS_zenoSWATH_DC24_VACV_73C_r3.wiff	73C_r3	YAHINALEYI	10	C57H82N12O17	YAHIN[+1]ALEYI	YAHIN(unimod:7)ALEYI	YAHIN[Dea]ALEYI	YAHIN[Deamidated (NQ)]ALEYI	0.7395	0.6751	#N/A	32.14+/-0.42	0.0189	1206.59	2	604.303	#N/A	32	4503	971	3532	0	0	0	#N/A	1.7e-05	VACV			FALSE
20221010_MS_zenoSWATH_DC24_VACV_37C_r1.wiff	37C_r1	SDLFPSFVRL	10	C56H85N13O15	SDLFPSFVRL	SDLFPSFVRL	SDLFPSFVRL	SDLFPSFVRL	0.9767	0.9975	#N/A	39.67+/-1.41	0	1179.63	2	590.822	#N/A	39.78	1087017	218732	868285	5848	2265	3583	#N/A	0.001155	VACV			FALSE
20221010_MS_zenoSWATH_DC24_VACV_37C_r2.wiff	37C_r2	SDLFPSFVRL	10	C56H85N13O15	SDLFPSFVRL	SDLFPSFVRL	SDLFPSFVRL	SDLFPSFVRL	0.976	0.988	#N/A	39.67+/-1.41	0	1179.63	2	590.822	#N/A	39.78	697496	133252	564244	2116	590	1525	#N/A	0.001095	VACV			FALSE
20221010_MS_zenoSWATH_DC24_VACV_37C_r3.wiff	37C_r3	SDLFPSFVRL	10	C56H85N13O15	SDLFPSFVRL	SDLFPSFVRL	SDLFPSFVRL	SDLFPSFVRL	0.9708	0.9959	#N/A	39.67+/-1.41	0	1179.63	2	590.822	#N/A	39.78	987575	184923	802652	4767	723	4044	#N/A	0.001292	VACV			FALSE
20221010_MS_zenoSWATH_DC24_VACV_41C_r1.wiff	41C_r1	SDLFPSFVRL	10	C56H85N13O15	SDLFPSFVRL	SDLFPSFVRL	SDLFPSFVRL	SDLFPSFVRL	0.9718	0.9836	#N/A	39.67+/-1.41	0.0001	1179.63	2	590.822	#N/A	39.78	310037	65472	244565	2985	665	2320	#N/A	0.000378	VACV			FALSE
20221010_MS_zenoSWATH_DC24_VACV_41C_r2.wiff	41C_r2	SDLFPSFVRL	10	C56H85N13O15	SDLFPSFVRL	SDLFPSFVRL	SDLFPSFVRL	SDLFPSFVRL	0.977	0.9949	#N/A	39.67+/-1.41	0	1179.63	2	590.822	#N/A	39.78	626567	124276	502291	101	101	0	#N/A	0.000898	VACV			FALSE
20221010_MS_zenoSWATH_DC24_VACV_41C_r3.wiff	41C_r3	SDLFPSFVRL	10	C56H85N13O15	SDLFPSFVRL	SDLFPSFVRL	SDLFPSFVRL	SDLFPSFVRL	0.9742	0.9962	#N/A	39.67+/-1.41	0	1179.63	2	590.822	#N/A	39.78	872273	161576	710697	4962	1613	3349	#N/A	0.001231	VACV			FALSE
20221010_MS_zenoSWATH_DC24_VACV_45C_r1.wiff	45C_r1	SDLFPSFVRL	10	C56H85N13O15	SDLFPSFVRL	SDLFPSFVRL	SDLFPSFVRL	SDLFPSFVRL	0.9742	0.9927	#N/A	39.67+/-1.41	0	1179.63	2	590.822	#N/A	39.78	899369	182635	716734	4628	1086	3542	#N/A	0.000984	VACV			FALSE
20221010_MS_zenoSWATH_DC24_VACV_45C_r2.wiff	45C_r2	SDLFPSFVRL	10	C56H85N13O15	SDLFPSFVRL	SDLFPSFVRL	SDLFPSFVRL	SDLFPSFVRL	0.9807	0.9921	#N/A	39.67+/-1.41	0	1179.63	2	590.822	#N/A	39.78	641850	127384	514466	2760	440	2320	#N/A	0.001114	VACV			FALSE
20221010_MS_zenoSWATH_DC24_VACV_45C_r3.wiff	45C_r3	SDLFPSFVRL	10	C56H85N13O15	SDLFPSFVRL	SDLFPSFVRL	SDLFPSFVRL	SDLFPSFVRL	0.9806	0.9978	#N/A	39.67+/-1.41	0	1179.63	2	590.822	#N/A	39.78	1013182	209081	804101	11016	2545	8471	#N/A	0.001168	VACV			FALSE
20221010_MS_zenoSWATH_DC24_VACV_49C_r1.wiff	49C_r1	SDLFPSFVRL	10	C56H85N13O15	SDLFPSFVRL	SDLFPSFVRL	SDLFPSFVRL	SDLFPSFVRL	0.9787	0.9901	#N/A	39.67+/-1.41	0	1179.63	2	590.822	#N/A	39.78	384122	71820	312303	9490	4161	5330	#N/A	0.000808	VACV			FALSE
20221010_MS_zenoSWATH_DC24_VACV_49C_r2.wiff	49C_r2	SDLFPSFVRL	10	C56H85N13O15	SDLFPSFVRL	SDLFPSFVRL	SDLFPSFVRL	SDLFPSFVRL	0.9816	0.991	#N/A	39.67+/-1.41	0	1179.63	2	590.822	#N/A	39.78	633965	128230	505734	4187	53	4134	#N/A	0.001021	VACV			FALSE
20221010_MS_zenoSWATH_DC24_VACV_49C_r3.wiff	49C_r3	SDLFPSFVRL	10	C56H85N13O15	SDLFPSFVRL	SDLFPSFVRL	SDLFPSFVRL	SDLFPSFVRL	0.9768	0.9881	#N/A	39.67+/-1.41	0	1179.63	2	590.822	#N/A	39.78	333952	60903	273049	1764	362	1403	#N/A	0.000756	VACV			FALSE
20221010_MS_zenoSWATH_DC24_VACV_53C_r1.wiff	53C_r1	SDLFPSFVRL	10	C56H85N13O15	SDLFPSFVRL	SDLFPSFVRL	SDLFPSFVRL	SDLFPSFVRL	0.9692	0.9914	#N/A	39.67+/-1.41	0	1179.63	2	590.822	#N/A	39.78	480219	92378	387841	3628	1056	2571	#N/A	0.000904	VACV			FALSE
20221010_MS_zenoSWATH_DC24_VACV_53C_r2.wiff	53C_r2	SDLFPSFVRL	10	C56H85N13O15	SDLFPSFVRL	SDLFPSFVRL	SDLFPSFVRL	SDLFPSFVRL	0.9413	0.9831	#N/A	39.67+/-1.41	0	1179.63	2	590.822	#N/A	39.78	61284	13076	48208	212	212	0	#N/A	0.000147	VACV			FALSE
20221010_MS_zenoSWATH_DC24_VACV_53C_r3.wiff	53C_r3	SDLFPSFVRL	10	C56H85N13O15	SDLFPSFVRL	SDLFPSFVRL	SDLFPSFVRL	SDLFPSFVRL	0.9611	0.9887	#N/A	39.67+/-1.41	0	1179.63	2	590.822	#N/A	39.78	201520	37964	163556	1370	758	612	#N/A	0.000689	VACV			FALSE
20221010_MS_zenoSWATH_DC24_VACV_57C_r1.wiff	57C_r1	SDLFPSFVRL	10	C56H85N13O15	SDLFPSFVRL	SDLFPSFVRL	SDLFPSFVRL	SDLFPSFVRL	0.9053	0.9885	#N/A	39.67+/-1.41	0	1179.63	2	590.822	#N/A	39.78	34030	7114	26917	0	0	0	#N/A	0.000134	VACV			FALSE
20221010_MS_zenoSWATH_DC24_VACV_57C_r2.wiff	57C_r2	SDLFPSFVRL	10	C56H85N13O15	SDLFPSFVRL	SDLFPSFVRL	SDLFPSFVRL	SDLFPSFVRL	0.7939	0.8849	#N/A	39.67+/-1.41	0.0155	1179.63	2	590.822	#N/A	39.78	4012	1129	2883	0	0	0	#N/A	2.2e-05	VACV			FALSE
20221010_MS_zenoSWATH_DC24_VACV_57C_r3.wiff	57C_r3	SDLFPSFVRL	10	C56H85N13O15	SDLFPSFVRL	SDLFPSFVRL	SDLFPSFVRL	SDLFPSFVRL	0.8713	0.9597	#N/A	39.67+/-1.41	0	1179.63	2	590.822	#N/A	39.78	16003	3164	12839	0	0	0	#N/A	6.6e-05	VACV			FALSE
20221010_MS_zenoSWATH_DC24_VACV_61C_r1.wiff	61C_r1	SDLFPSFVRL	10	C56H85N13O15	SDLFPSFVRL	SDLFPSFVRL	SDLFPSFVRL	SDLFPSFVRL	0.6617	0.8479	#N/A	39.67+/-1.41	0.0628	1179.63	2	590.822	#N/A	39.78	3244	1138	2106	339	339	0	#N/A	8e-06	VACV			FALSE
20221010_MS_zenoSWATH_DC24_VACV_61C_r2.wiff	61C_r2	SDLFPSFVRL	10	C56H85N13O15	SDLFPSFVRL	SDLFPSFVRL	SDLFPSFVRL	SDLFPSFVRL	0.6201	0.3527	#N/A	39.67+/-1.41	0.0533	1179.63	2	590.822	#N/A	39.78	4140	1478	2661	0	0	0	#N/A	1.2e-05	VACV			FALSE
20221010_MS_zenoSWATH_DC24_VACV_61C_r3.wiff	61C_r3	SDLFPSFVRL	10	C56H85N13O15	SDLFPSFVRL	SDLFPSFVRL	SDLFPSFVRL	SDLFPSFVRL	0.55	0.5638	#N/A	39.67+/-1.41	0.0391	1179.63	2	590.822	#N/A	39.78	2145	357	1788	0	0	0	#N/A	7e-06	VACV			FALSE
20221010_MS_zenoSWATH_DC24_VACV_65C_r1.wiff	65C_r1	SDLFPSFVRL	10	C56H85N13O15	SDLFPSFVRL	SDLFPSFVRL	SDLFPSFVRL	SDLFPSFVRL	0.6315	0.5934	#N/A	39.67+/-1.41	0.0114	1179.63	2	590.822	#N/A	39.78	11117	1267	9850	628	0	628	#N/A	3.6e-05	VACV			FALSE
20221010_MS_zenoSWATH_DC24_VACV_65C_r2.wiff	65C_r2	SDLFPSFVRL	10	C56H85N13O15	SDLFPSFVRL	SDLFPSFVRL	SDLFPSFVRL	SDLFPSFVRL	0.6537	0.4874	#N/A	39.67+/-1.41	0.2926	1179.63	2	590.822	#N/A	39.78	825	194	631	0	0	0	#N/A	6e-06	VACV			FALSE
20221010_MS_zenoSWATH_DC24_VACV_65C_r3.wiff	65C_r3	SDLFPSFVRL	10	C56H85N13O15	SDLFPSFVRL	SDLFPSFVRL	SDLFPSFVRL	SDLFPSFVRL	0.8287	0.9812	#N/A	39.67+/-1.41	0.0756	1179.63	2	590.822	#N/A	39.78	2607	1162	1445	0	0	0	#N/A	8e-06	VACV			FALSE
20221010_MS_zenoSWATH_DC24_VACV_69C_r1.wiff	69C_r1	SDLFPSFVRL	10	C56H85N13O15	SDLFPSFVRL	SDLFPSFVRL	SDLFPSFVRL	SDLFPSFVRL	0.4867	0.6824	#N/A	39.67+/-1.41	0.0468	1179.63	2	590.822	#N/A	39.78	5532	1265	4267	0	0	0	#N/A	2.2e-05	VACV			FALSE
20221010_MS_zenoSWATH_DC24_VACV_69C_r2.wiff	69C_r2	SDLFPSFVRL	10	C56H85N13O15	SDLFPSFVRL	SDLFPSFVRL	SDLFPSFVRL	SDLFPSFVRL	0.6824	0.8373	#N/A	39.67+/-1.41	0.0899	1179.63	2	590.822	#N/A	39.78	3818	1635	2183	1618	1618	0	#N/A	1.4e-05	VACV			FALSE
20221010_MS_zenoSWATH_DC24_VACV_69C_r3.wiff	69C_r3	SDLFPSFVRL	10	C56H85N13O15	SDLFPSFVRL	SDLFPSFVRL	SDLFPSFVRL	SDLFPSFVRL	0.8172	0.8579	#N/A	39.67+/-1.41	0.0009	1179.63	2	590.822	#N/A	39.78	2871	850	2020	0	0	0	#N/A	2.5e-05	VACV			FALSE
20221010_MS_zenoSWATH_DC24_VACV_73C_r1.wiff	73C_r1	SDLFPSFVRL	10	C56H85N13O15	SDLFPSFVRL	SDLFPSFVRL	SDLFPSFVRL	SDLFPSFVRL	0.2874	0.5365	#N/A	39.67+/-1.41	0.1155	1179.63	2	590.822	#N/A	39.78	485	35	450	20	20	0	#N/A	3e-06	VACV			FALSE
20221010_MS_zenoSWATH_DC24_VACV_73C_r2.wiff	73C_r2	SDLFPSFVRL	10	C56H85N13O15	SDLFPSFVRL	SDLFPSFVRL	SDLFPSFVRL	SDLFPSFVRL	0.7236	0.5415	#N/A	39.67+/-1.41	0.0048	1179.63	2	590.822	#N/A	39.78	5488	1476	4012	228	228	0	#N/A	4.4e-05	VACV			FALSE
20221010_MS_zenoSWATH_DC24_VACV_73C_r3.wiff	73C_r3	SDLFPSFVRL	10	C56H85N13O15	SDLFPSFVRL	SDLFPSFVRL	SDLFPSFVRL	SDLFPSFVRL	0.6018	0.8042	#N/A	39.67+/-1.41	0.0192	1179.63	2	590.822	#N/A	39.78	20021	4460	15561	470	0	470	#N/A	7.4e-05	VACV			FALSE
20221010_MS_zenoSWATH_DC24_VACV_37C_r1.wiff	37C_r1	VISDLFPSFVRL	12	C67H105N15O17	VISDLFPSFVRL	VISDLFPSFVRL	VISDLFPSFVRL	VISDLFPSFVRL	0.9673	0.9958	#N/A	43.35+/-1.41	0	1391.78	2	696.898	#N/A	44.03	825864	228730	597134	2767	1862	905	#N/A	0.000877	VACV			FALSE
20221010_MS_zenoSWATH_DC24_VACV_37C_r2.wiff	37C_r2	VISDLFPSFVRL	12	C67H105N15O17	VISDLFPSFVRL	VISDLFPSFVRL	VISDLFPSFVRL	VISDLFPSFVRL	0.9696	0.9938	#N/A	43.35+/-1.41	0	1391.78	2	696.898	#N/A	44.03	477381	132218	345164	3699	2645	1053	#N/A	0.00075	VACV			FALSE
20221010_MS_zenoSWATH_DC24_VACV_37C_r3.wiff	37C_r3	VISDLFPSFVRL	12	C67H105N15O17	VISDLFPSFVRL	VISDLFPSFVRL	VISDLFPSFVRL	VISDLFPSFVRL	0.9603	0.9948	#N/A	43.35+/-1.41	0	1391.78	2	696.898	#N/A	44.03	649700	183199	466501	270	270	0	#N/A	0.00085	VACV			FALSE
20221010_MS_zenoSWATH_DC24_VACV_41C_r1.wiff	41C_r1	VISDLFPSFVRL	12	C67H105N15O17	VISDLFPSFVRL	VISDLFPSFVRL	VISDLFPSFVRL	VISDLFPSFVRL	0.9589	0.9882	#N/A	43.35+/-1.41	0	1391.78	2	696.898	#N/A	44.03	146559	41046	105513	228	228	0	#N/A	0.000179	VACV			FALSE
20221010_MS_zenoSWATH_DC24_VACV_41C_r2.wiff	41C_r2	VISDLFPSFVRL	12	C67H105N15O17	VISDLFPSFVRL	VISDLFPSFVRL	VISDLFPSFVRL	VISDLFPSFVRL	0.9659	0.9918	#N/A	43.35+/-1.41	0	1391.78	2	696.898	#N/A	44.03	383826	110304	273522	2057	591	1467	#N/A	0.00055	VACV			FALSE
20221010_MS_zenoSWATH_DC24_VACV_41C_r3.wiff	41C_r3	VISDLFPSFVRL	12	C67H105N15O17	VISDLFPSFVRL	VISDLFPSFVRL	VISDLFPSFVRL	VISDLFPSFVRL	0.9653	0.9992	#N/A	43.35+/-1.41	0	1391.78	2	696.898	#N/A	44.03	703920	192273	511646	2796	1314	1482	#N/A	0.000994	VACV			FALSE
20221010_MS_zenoSWATH_DC24_VACV_45C_r1.wiff	45C_r1	VISDLFPSFVRL	12	C67H105N15O17	VISDLFPSFVRL	VISDLFPSFVRL	VISDLFPSFVRL	VISDLFPSFVRL	0.9671	0.9903	#N/A	43.35+/-1.41	0	1391.78	2	696.898	#N/A	44.03	721164	207749	513415	3551	855	2696	#N/A	0.000789	VACV			FALSE
20221010_MS_zenoSWATH_DC24_VACV_45C_r2.wiff	45C_r2	VISDLFPSFVRL	12	C67H105N15O17	VISDLFPSFVRL	VISDLFPSFVRL	VISDLFPSFVRL	VISDLFPSFVRL	0.9697	0.9975	#N/A	43.35+/-1.41	0	1391.78	2	696.898	#N/A	44.03	493080	137844	355237	224	224	0	#N/A	0.000856	VACV			FALSE
20221010_MS_zenoSWATH_DC24_VACV_45C_r3.wiff	45C_r3	VISDLFPSFVRL	12	C67H105N15O17	VISDLFPSFVRL	VISDLFPSFVRL	VISDLFPSFVRL	VISDLFPSFVRL	0.9738	0.9911	#N/A	43.35+/-1.41	0	1391.78	2	696.898	#N/A	44.03	865055	245699	619357	6221	2463	3758	#N/A	0.000998	VACV			FALSE
20221010_MS_zenoSWATH_DC24_VACV_49C_r1.wiff	49C_r1	VISDLFPSFVRL	12	C67H105N15O17	VISDLFPSFVRL	VISDLFPSFVRL	VISDLFPSFVRL	VISDLFPSFVRL	0.9591	0.9907	#N/A	43.35+/-1.41	0	1391.78	2	696.898	#N/A	44.03	446283	133053	313230	651	388	263	#N/A	0.000939	VACV			FALSE
20221010_MS_zenoSWATH_DC24_VACV_49C_r2.wiff	49C_r2	VISDLFPSFVRL	12	C67H105N15O17	VISDLFPSFVRL	VISDLFPSFVRL	VISDLFPSFVRL	VISDLFPSFVRL	0.9699	0.9963	#N/A	43.35+/-1.41	0	1391.78	2	696.898	#N/A	44.03	594347	177032	417315	223	223	0	#N/A	0.000958	VACV			FALSE
20221010_MS_zenoSWATH_DC24_VACV_49C_r3.wiff	49C_r3	VISDLFPSFVRL	12	C67H105N15O17	VISDLFPSFVRL	VISDLFPSFVRL	VISDLFPSFVRL	VISDLFPSFVRL	0.9561	0.9885	#N/A	43.35+/-1.41	0	1391.78	2	696.898	#N/A	44.03	222791	62677	160114	286	286	0	#N/A	0.000505	VACV			FALSE
20221010_MS_zenoSWATH_DC24_VACV_53C_r1.wiff	53C_r1	VISDLFPSFVRL	12	C67H105N15O17	VISDLFPSFVRL	VISDLFPSFVRL	VISDLFPSFVRL	VISDLFPSFVRL	0.9771	0.9933	#N/A	43.35+/-1.41	0	1391.78	2	696.898	#N/A	44.03	638167	183466	454702	868	0	868	#N/A	0.001202	VACV			FALSE
20221010_MS_zenoSWATH_DC24_VACV_53C_r2.wiff	53C_r2	VISDLFPSFVRL	12	C67H105N15O17	VISDLFPSFVRL	VISDLFPSFVRL	VISDLFPSFVRL	VISDLFPSFVRL	0.9568	0.9487	#N/A	43.35+/-1.41	0	1391.78	2	696.898	#N/A	44.03	29945	8601	21344	0	0	0	#N/A	7.2e-05	VACV			FALSE
20221010_MS_zenoSWATH_DC24_VACV_53C_r3.wiff	53C_r3	VISDLFPSFVRL	12	C67H105N15O17	VISDLFPSFVRL	VISDLFPSFVRL	VISDLFPSFVRL	VISDLFPSFVRL	0.9615	0.9915	#N/A	43.35+/-1.41	0	1391.78	2	696.898	#N/A	44.03	199786	57963	141823	257	257	0	#N/A	0.000683	VACV			FALSE
20221010_MS_zenoSWATH_DC24_VACV_57C_r1.wiff	57C_r1	VISDLFPSFVRL	12	C67H105N15O17	VISDLFPSFVRL	VISDLFPSFVRL	VISDLFPSFVRL	VISDLFPSFVRL	0.9206	0.9475	#N/A	43.35+/-1.41	0	1391.78	2	696.898	#N/A	44.03	40677	12835	27842	0	0	0	#N/A	0.00016	VACV			FALSE
20221010_MS_zenoSWATH_DC24_VACV_57C_r2.wiff	57C_r2	VISDLFPSFVRL	12	C67H105N15O17	VISDLFPSFVRL	VISDLFPSFVRL	VISDLFPSFVRL	VISDLFPSFVRL	0.5754	0.6235	#N/A	43.35+/-1.41	0.054	1391.78	2	696.898	#N/A	44.03	3400	1044	2356	424	424	0	#N/A	1.8e-05	VACV			FALSE
20221010_MS_zenoSWATH_DC24_VACV_57C_r3.wiff	57C_r3	VISDLFPSFVRL	12	C67H105N15O17	VISDLFPSFVRL	VISDLFPSFVRL	VISDLFPSFVRL	VISDLFPSFVRL	0.885	0.9353	#N/A	43.35+/-1.41	0.0013	1391.78	2	696.898	#N/A	44.03	18379	5832	12547	107	107	0	#N/A	7.6e-05	VACV			FALSE
20221010_MS_zenoSWATH_DC24_VACV_61C_r1.wiff	61C_r1	VISDLFPSFVRL	12	C67H105N15O17	VISDLFPSFVRL	VISDLFPSFVRL	VISDLFPSFVRL	VISDLFPSFVRL	0.4299	0.5803	#N/A	43.35+/-1.41	0.0185	1391.78	2	696.898	#N/A	44.03	6082	1387	4696	9	9	0	#N/A	1.5e-05	VACV			FALSE
20221010_MS_zenoSWATH_DC24_VACV_61C_r2.wiff	61C_r2	VISDLFPSFVRL	12	C67H105N15O17	VISDLFPSFVRL	VISDLFPSFVRL	VISDLFPSFVRL	VISDLFPSFVRL	0.5501	0.9197	#N/A	43.35+/-1.41	0.0931	1391.78	2	696.898	#N/A	44.03	7935	3219	4716	99	99	0	#N/A	2.4e-05	VACV			FALSE
20221010_MS_zenoSWATH_DC24_VACV_61C_r3.wiff	61C_r3	VISDLFPSFVRL	12	C67H105N15O17	VISDLFPSFVRL	VISDLFPSFVRL	VISDLFPSFVRL	VISDLFPSFVRL	0.7297	0.7373	#N/A	43.35+/-1.41	0.0128	1391.78	2	696.898	#N/A	44.03	3767	1390	2377	440	0	440	#N/A	1.3e-05	VACV			FALSE
20221010_MS_zenoSWATH_DC24_VACV_65C_r1.wiff	65C_r1	VISDLFPSFVRL	12	C67H105N15O17	VISDLFPSFVRL	VISDLFPSFVRL	VISDLFPSFVRL	VISDLFPSFVRL	0.6073	0.8212	#N/A	43.35+/-1.41	0.0457	1391.78	2	696.898	#N/A	44.03	13290	3699	9591	155	155	0	#N/A	4.3e-05	VACV			FALSE
20221010_MS_zenoSWATH_DC24_VACV_65C_r2.wiff	65C_r2	VISDLFPSFVRL	12	C67H105N15O17	VISDLFPSFVRL	VISDLFPSFVRL	VISDLFPSFVRL	VISDLFPSFVRL	0.3079	0.7114	#N/A	43.35+/-1.41	0.3359	1391.78	2	696.898	#N/A	44.03	899	431	468	130	130	0	#N/A	6e-06	VACV			FALSE
20221010_MS_zenoSWATH_DC24_VACV_65C_r3.wiff	65C_r3	VISDLFPSFVRL	12	C67H105N15O17	VISDLFPSFVRL	VISDLFPSFVRL	VISDLFPSFVRL	VISDLFPSFVRL	0.5671	0.7715	#N/A	43.35+/-1.41	0.1116	1391.78	2	696.898	#N/A	44.03	741	402	339	0	0	0	#N/A	2e-06	VACV			FALSE
20221010_MS_zenoSWATH_DC24_VACV_69C_r1.wiff	69C_r1	VISDLFPSFVRL	12	C67H105N15O17	VISDLFPSFVRL	VISDLFPSFVRL	VISDLFPSFVRL	VISDLFPSFVRL	0.7194	0.9687	#N/A	43.35+/-1.41	0.0492	1391.78	2	696.898	#N/A	44.03	3567	449	3119	67	67	0	#N/A	1.4e-05	VACV			FALSE
20221010_MS_zenoSWATH_DC24_VACV_69C_r2.wiff	69C_r2	VISDLFPSFVRL	12	C67H105N15O17	VISDLFPSFVRL	VISDLFPSFVRL	VISDLFPSFVRL	VISDLFPSFVRL	0.6873	0.7546	#N/A	43.35+/-1.41	0.0009	1391.78	2	696.898	#N/A	44.03	5267	2837	2430	316	316	0	#N/A	2e-05	VACV			FALSE
20221010_MS_zenoSWATH_DC24_VACV_69C_r3.wiff	69C_r3	VISDLFPSFVRL	12	C67H105N15O17	VISDLFPSFVRL	VISDLFPSFVRL	VISDLFPSFVRL	VISDLFPSFVRL	0.6912	0.975	#N/A	43.35+/-1.41	0.026	1391.78	2	696.898	#N/A	44.03	1223	638	585	233	233	0	#N/A	1.1e-05	VACV			FALSE
20221010_MS_zenoSWATH_DC24_VACV_73C_r1.wiff	73C_r1	VISDLFPSFVRL	12	C67H105N15O17	VISDLFPSFVRL	VISDLFPSFVRL	VISDLFPSFVRL	VISDLFPSFVRL	0.658	0.6853	#N/A	43.35+/-1.41	0.0284	1391.78	2	696.898	#N/A	44.03	1145	523	622	215	215	0	#N/A	7e-06	VACV			FALSE
20221010_MS_zenoSWATH_DC24_VACV_73C_r2.wiff	73C_r2	VISDLFPSFVRL	12	C67H105N15O17	VISDLFPSFVRL	VISDLFPSFVRL	VISDLFPSFVRL	VISDLFPSFVRL	0.7863	0.498	#N/A	43.35+/-1.41	0.0106	1391.78	2	696.898	#N/A	44.03	2040	1484	556	513	513	0	#N/A	1.7e-05	VACV			FALSE
20221010_MS_zenoSWATH_DC24_VACV_73C_r3.wiff	73C_r3	VISDLFPSFVRL	12	C67H105N15O17	VISDLFPSFVRL	VISDLFPSFVRL	VISDLFPSFVRL	VISDLFPSFVRL	0.4804	0.5655	#N/A	43.35+/-1.41	0.0411	1391.78	2	696.898	#N/A	44.03	5640	1032	4608	0	0	0	#N/A	2.1e-05	VACV			FALSE
20221010_MS_zenoSWATH_DC24_VACV_37C_r1.wiff	37C_r1	VISDLFPSFVRL	12	C67H105N15O17	VISDLFPSFVRL	VISDLFPSFVRL	VISDLFPSFVRL	VISDLFPSFVRL	0.9434	0.9054	#N/A	43.34+/-1.41	0	1391.78	3	464.934	#N/A	44.03	95214	14140	81074	0	0	0	#N/A	0.000101	VACV			FALSE
20221010_MS_zenoSWATH_DC24_VACV_37C_r2.wiff	37C_r2	VISDLFPSFVRL	12	C67H105N15O17	VISDLFPSFVRL	VISDLFPSFVRL	VISDLFPSFVRL	VISDLFPSFVRL	0.9272	0.8824	#N/A	43.34+/-1.41	0	1391.78	3	464.934	#N/A	44.03	61644	8079	53565	0	0	0	#N/A	9.7e-05	VACV			FALSE
20221010_MS_zenoSWATH_DC24_VACV_37C_r3.wiff	37C_r3	VISDLFPSFVRL	12	C67H105N15O17	VISDLFPSFVRL	VISDLFPSFVRL	VISDLFPSFVRL	VISDLFPSFVRL	0.9226	0.8671	#N/A	43.34+/-1.41	0	1391.78	3	464.934	#N/A	44.03	78346	10835	67511	0	0	0	#N/A	0.000102	VACV			FALSE
20221010_MS_zenoSWATH_DC24_VACV_41C_r1.wiff	41C_r1	VISDLFPSFVRL	12	C67H105N15O17	VISDLFPSFVRL	VISDLFPSFVRL	VISDLFPSFVRL	VISDLFPSFVRL	0.8853	0.8869	#N/A	43.34+/-1.41	0	1391.78	3	464.934	#N/A	44.03	17024	1680	15344	0	0	0	#N/A	2.1e-05	VACV			FALSE
20221010_MS_zenoSWATH_DC24_VACV_41C_r2.wiff	41C_r2	VISDLFPSFVRL	12	C67H105N15O17	VISDLFPSFVRL	VISDLFPSFVRL	VISDLFPSFVRL	VISDLFPSFVRL	0.9164	0.8693	#N/A	43.34+/-1.41	0	1391.78	3	464.934	#N/A	44.03	43608	6240	37368	0	0	0	#N/A	6.3e-05	VACV			FALSE
20221010_MS_zenoSWATH_DC24_VACV_41C_r3.wiff	41C_r3	VISDLFPSFVRL	12	C67H105N15O17	VISDLFPSFVRL	VISDLFPSFVRL	VISDLFPSFVRL	VISDLFPSFVRL	0.9275	0.9032	#N/A	43.34+/-1.41	0	1391.78	3	464.934	#N/A	44.03	77265	9408	67857	0	0	0	#N/A	0.000109	VACV			FALSE
20221010_MS_zenoSWATH_DC24_VACV_45C_r1.wiff	45C_r1	VISDLFPSFVRL	12	C67H105N15O17	VISDLFPSFVRL	VISDLFPSFVRL	VISDLFPSFVRL	VISDLFPSFVRL	0.8971	0.9594	#N/A	43.34+/-1.41	0	1391.78	3	464.934	#N/A	44.03	91442	11262	80181	0	0	0	#N/A	0.0001	VACV			FALSE
20221010_MS_zenoSWATH_DC24_VACV_45C_r2.wiff	45C_r2	VISDLFPSFVRL	12	C67H105N15O17	VISDLFPSFVRL	VISDLFPSFVRL	VISDLFPSFVRL	VISDLFPSFVRL	0.9013	0.9269	#N/A	43.34+/-1.41	0	1391.78	3	464.934	#N/A	44.03	57451	8333	49118	0	0	0	#N/A	0.0001	VACV			FALSE
20221010_MS_zenoSWATH_DC24_VACV_45C_r3.wiff	45C_r3	VISDLFPSFVRL	12	C67H105N15O17	VISDLFPSFVRL	VISDLFPSFVRL	VISDLFPSFVRL	VISDLFPSFVRL	0.9111	0.8691	#N/A	43.34+/-1.41	0	1391.78	3	464.934	#N/A	44.03	97397	14036	83360	0	0	0	#N/A	0.000112	VACV			FALSE
20221010_MS_zenoSWATH_DC24_VACV_49C_r1.wiff	49C_r1	VISDLFPSFVRL	12	C67H105N15O17	VISDLFPSFVRL	VISDLFPSFVRL	VISDLFPSFVRL	VISDLFPSFVRL	0.9385	0.8672	#N/A	43.34+/-1.41	0	1391.78	3	464.934	#N/A	44.03	55057	8034	47023	0	0	0	#N/A	0.000116	VACV			FALSE
20221010_MS_zenoSWATH_DC24_VACV_49C_r2.wiff	49C_r2	VISDLFPSFVRL	12	C67H105N15O17	VISDLFPSFVRL	VISDLFPSFVRL	VISDLFPSFVRL	VISDLFPSFVRL	0.8994	0.8767	#N/A	43.34+/-1.41	0	1391.78	3	464.934	#N/A	44.03	71242	11098	60143	0	0	0	#N/A	0.000115	VACV			FALSE
20221010_MS_zenoSWATH_DC24_VACV_49C_r3.wiff	49C_r3	VISDLFPSFVRL	12	C67H105N15O17	VISDLFPSFVRL	VISDLFPSFVRL	VISDLFPSFVRL	VISDLFPSFVRL	0.8891	0.7665	#N/A	43.34+/-1.41	0	1391.78	3	464.934	#N/A	44.03	24710	4205	20505	0	0	0	#N/A	5.6e-05	VACV			FALSE
20221010_MS_zenoSWATH_DC24_VACV_53C_r1.wiff	53C_r1	VISDLFPSFVRL	12	C67H105N15O17	VISDLFPSFVRL	VISDLFPSFVRL	VISDLFPSFVRL	VISDLFPSFVRL	0.9281	0.8896	#N/A	43.34+/-1.41	0	1391.78	3	464.934	#N/A	44.03	65840	7062	58778	0	0	0	#N/A	0.000124	VACV			FALSE
20221010_MS_zenoSWATH_DC24_VACV_53C_r2.wiff	53C_r2	VISDLFPSFVRL	12	C67H105N15O17	VISDLFPSFVRL	VISDLFPSFVRL	VISDLFPSFVRL	VISDLFPSFVRL	0.7401	0.475	#N/A	43.34+/-1.41	0	1391.78	3	464.934	#N/A	44.03	2736	58	2678	0	0	0	#N/A	7e-06	VACV			FALSE
20221010_MS_zenoSWATH_DC24_VACV_53C_r3.wiff	53C_r3	VISDLFPSFVRL	12	C67H105N15O17	VISDLFPSFVRL	VISDLFPSFVRL	VISDLFPSFVRL	VISDLFPSFVRL	0.9193	0.8959	#N/A	43.34+/-1.41	0	1391.78	3	464.934	#N/A	44.03	24367	2503	21864	0	0	0	#N/A	8.3e-05	VACV			FALSE
20221010_MS_zenoSWATH_DC24_VACV_57C_r1.wiff	57C_r1	VISDLFPSFVRL	12	C67H105N15O17	VISDLFPSFVRL	VISDLFPSFVRL	VISDLFPSFVRL	VISDLFPSFVRL	0.7062	0.766	#N/A	43.34+/-1.41	0	1391.78	3	464.934	#N/A	44.03	5957	654	5303	0	0	0	#N/A	2.3e-05	VACV			FALSE
20221010_MS_zenoSWATH_DC24_VACV_57C_r2.wiff	57C_r2	VISDLFPSFVRL	12	C67H105N15O17	VISDLFPSFVRL	VISDLFPSFVRL	VISDLFPSFVRL	VISDLFPSFVRL	0.6208	0.5394	#N/A	43.34+/-1.41	0.054	1391.78	3	464.934	#N/A	44.03	4563	591	3972	0	0	0	#N/A	2.5e-05	VACV			FALSE
20221010_MS_zenoSWATH_DC24_VACV_57C_r3.wiff	57C_r3	VISDLFPSFVRL	12	C67H105N15O17	VISDLFPSFVRL	VISDLFPSFVRL	VISDLFPSFVRL	VISDLFPSFVRL	0.5976	0.616	#N/A	43.34+/-1.41	0.0013	1391.78	3	464.934	#N/A	44.03	9435	355	9079	0	0	0	#N/A	3.9e-05	VACV			FALSE
20221010_MS_zenoSWATH_DC24_VACV_61C_r1.wiff	61C_r1	VISDLFPSFVRL	12	C67H105N15O17	VISDLFPSFVRL	VISDLFPSFVRL	VISDLFPSFVRL	VISDLFPSFVRL	0.2486	0.5063	#N/A	43.34+/-1.41	0.0185	1391.78	3	464.934	#N/A	44.03	872	470	401	0	0	0	#N/A	2e-06	VACV			FALSE
20221010_MS_zenoSWATH_DC24_VACV_61C_r2.wiff	61C_r2	VISDLFPSFVRL	12	C67H105N15O17	VISDLFPSFVRL	VISDLFPSFVRL	VISDLFPSFVRL	VISDLFPSFVRL	0.1739	0.569	#N/A	43.34+/-1.41	0.0931	1391.78	3	464.934	#N/A	44.03	573	539	34	0	0	0	#N/A	2e-06	VACV			FALSE
20221010_MS_zenoSWATH_DC24_VACV_61C_r3.wiff	61C_r3	VISDLFPSFVRL	12	C67H105N15O17	VISDLFPSFVRL	VISDLFPSFVRL	VISDLFPSFVRL	VISDLFPSFVRL	0.1739	0.4187	#N/A	43.34+/-1.41	0.0128	1391.78	3	464.934	#N/A	44.03	448	408	40	0	0	0	#N/A	2e-06	VACV			FALSE
20221010_MS_zenoSWATH_DC24_VACV_65C_r1.wiff	65C_r1	VISDLFPSFVRL	12	C67H105N15O17	VISDLFPSFVRL	VISDLFPSFVRL	VISDLFPSFVRL	VISDLFPSFVRL	0	0.5122	#N/A	43.34+/-1.41	0.0457	1391.78	3	464.934	#N/A	44.03	557	557	0	0	0	0	#N/A	2e-06	VACV			FALSE
20221010_MS_zenoSWATH_DC24_VACV_65C_r2.wiff	65C_r2	VISDLFPSFVRL	12	C67H105N15O17	VISDLFPSFVRL	VISDLFPSFVRL	VISDLFPSFVRL	VISDLFPSFVRL	0	0.4187	#N/A	43.34+/-1.41	0.3359	1391.78	3	464.934	#N/A	44.03	6	6	0	0	0	0	#N/A	0	VACV			FALSE
20221010_MS_zenoSWATH_DC24_VACV_65C_r3.wiff	65C_r3	VISDLFPSFVRL	12	C67H105N15O17	VISDLFPSFVRL	VISDLFPSFVRL	VISDLFPSFVRL	VISDLFPSFVRL	0	0.53	#N/A	43.34+/-1.41	0.1116	1391.78	3	464.934	#N/A	44.03	311	311	0	0	0	0	#N/A	1e-06	VACV			FALSE
20221010_MS_zenoSWATH_DC24_VACV_69C_r1.wiff	69C_r1	VISDLFPSFVRL	12	C67H105N15O17	VISDLFPSFVRL	VISDLFPSFVRL	VISDLFPSFVRL	VISDLFPSFVRL	0.2744	0.4187	#N/A	43.34+/-1.41	0.0492	1391.78	3	464.934	#N/A	44.03	142	57	85	0	0	0	#N/A	1e-06	VACV			FALSE
20221010_MS_zenoSWATH_DC24_VACV_69C_r2.wiff	69C_r2	VISDLFPSFVRL	12	C67H105N15O17	VISDLFPSFVRL	VISDLFPSFVRL	VISDLFPSFVRL	VISDLFPSFVRL	0.4801	0.3847	#N/A	43.34+/-1.41	0.0009	1391.78	3	464.934	#N/A	44.03	461	193	269	0	0	0	#N/A	2e-06	VACV			FALSE
20221010_MS_zenoSWATH_DC24_VACV_69C_r3.wiff	69C_r3	VISDLFPSFVRL	12	C67H105N15O17	VISDLFPSFVRL	VISDLFPSFVRL	VISDLFPSFVRL	VISDLFPSFVRL	0.4782	0	#N/A	43.34+/-1.41	0.026	1391.78	3	464.934	#N/A	44.03	242	0	242	0	0	0	#N/A	2e-06	VACV			FALSE
20221010_MS_zenoSWATH_DC24_VACV_73C_r1.wiff	73C_r1	VISDLFPSFVRL	12	C67H105N15O17	VISDLFPSFVRL	VISDLFPSFVRL	VISDLFPSFVRL	VISDLFPSFVRL	0.48	0.7329	#N/A	43.34+/-1.41	0.0284	1391.78	3	464.934	#N/A	44.03	207	19	188	0	0	0	#N/A	1e-06	VACV			FALSE
20221010_MS_zenoSWATH_DC24_VACV_73C_r2.wiff	73C_r2	VISDLFPSFVRL	12	C67H105N15O17	VISDLFPSFVRL	VISDLFPSFVRL	VISDLFPSFVRL	VISDLFPSFVRL	0.1739	0.3191	#N/A	43.34+/-1.41	0.0106	1391.78	3	464.934	#N/A	44.03	488	351	137	0	0	0	#N/A	4e-06	VACV			FALSE
20221010_MS_zenoSWATH_DC24_VACV_73C_r3.wiff	73C_r3	VISDLFPSFVRL	12	C67H105N15O17	VISDLFPSFVRL	VISDLFPSFVRL	VISDLFPSFVRL	VISDLFPSFVRL	0	0.4187	#N/A	43.34+/-1.41	0.0411	1391.78	3	464.934	#N/A	44.03	488	488	0	0	0	0	#N/A	2e-06	VACV			FALSE
20221010_MS_zenoSWATH_DC24_VACV_37C_r1.wiff	37C_r1	AAFEFINSL	9	C48H70N10O14	AAFEFINSL	AAFEFINSL	AAFEFINSL	AAFEFINSL	0.7899	0.9971	#N/A	39.9+/-0.6	0.0001	1010.51	2	506.261	#N/A	40.05	1517402	554006	963396	11677	6001	5677	#N/A	0.001612	VACV			FALSE
20221010_MS_zenoSWATH_DC24_VACV_37C_r2.wiff	37C_r2	AAFEFINSL	9	C48H70N10O14	AAFEFINSL	AAFEFINSL	AAFEFINSL	AAFEFINSL	0.827	0.9953	#N/A	39.9+/-0.6	0.0002	1010.51	2	506.261	#N/A	40.05	1051693	390286	661407	6385	4791	1594	#N/A	0.001651	VACV			FALSE
20221010_MS_zenoSWATH_DC24_VACV_37C_r3.wiff	37C_r3	AAFEFINSL	9	C48H70N10O14	AAFEFINSL	AAFEFINSL	AAFEFINSL	AAFEFINSL	0.9509	0.9913	#N/A	39.9+/-0.6	0	1010.51	2	506.261	#N/A	40.05	1580385	538132	1042253	7722	4625	3097	#N/A	0.002067	VACV			FALSE
20221010_MS_zenoSWATH_DC24_VACV_41C_r1.wiff	41C_r1	AAFEFINSL	9	C48H70N10O14	AAFEFINSL	AAFEFINSL	AAFEFINSL	AAFEFINSL	0.9347	0.9927	#N/A	39.9+/-0.6	0	1010.51	2	506.261	#N/A	40.05	1092556	392011	700544	8342	2517	5825	#N/A	0.001332	VACV			FALSE
20221010_MS_zenoSWATH_DC24_VACV_41C_r2.wiff	41C_r2	AAFEFINSL	9	C48H70N10O14	AAFEFINSL	AAFEFINSL	AAFEFINSL	AAFEFINSL	0.9513	0.9991	#N/A	39.9+/-0.6	0	1010.51	2	506.261	#N/A	40.05	1147747	373241	774505	6465	5534	931	#N/A	0.001646	VACV			FALSE
20221010_MS_zenoSWATH_DC24_VACV_41C_r3.wiff	41C_r3	AAFEFINSL	9	C48H70N10O14	AAFEFINSL	AAFEFINSL	AAFEFINSL	AAFEFINSL	0.8033	0.9953	#N/A	39.9+/-0.6	0.0002	1010.51	2	506.261	#N/A	40.05	996377	362608	633769	3616	1484	2132	#N/A	0.001406	VACV			FALSE
20221010_MS_zenoSWATH_DC24_VACV_45C_r1.wiff	45C_r1	AAFEFINSL	9	C48H70N10O14	AAFEFINSL	AAFEFINSL	AAFEFINSL	AAFEFINSL	0.7755	0.9872	#N/A	39.9+/-0.6	0.0002	1010.51	2	506.261	#N/A	40.05	1934207	715594	1218613	20502	9836	10666	#N/A	0.002115	VACV			FALSE
20221010_MS_zenoSWATH_DC24_VACV_45C_r2.wiff	45C_r2	AAFEFINSL	9	C48H70N10O14	AAFEFINSL	AAFEFINSL	AAFEFINSL	AAFEFINSL	0.7971	0.9948	#N/A	39.9+/-0.6	0	1010.51	2	506.261	#N/A	40.05	999238	359092	640146	9903	3829	6074	#N/A	0.001734	VACV			FALSE
20221010_MS_zenoSWATH_DC24_VACV_45C_r3.wiff	45C_r3	AAFEFINSL	9	C48H70N10O14	AAFEFINSL	AAFEFINSL	AAFEFINSL	AAFEFINSL	0.8042	0.9933	#N/A	39.9+/-0.6	0.0002	1010.51	2	506.261	#N/A	40.05	1629142	586933	1042209	4219	3963	256	#N/A	0.001879	VACV			FALSE
20221010_MS_zenoSWATH_DC24_VACV_49C_r1.wiff	49C_r1	AAFEFINSL	9	C48H70N10O14	AAFEFINSL	AAFEFINSL	AAFEFINSL	AAFEFINSL	0.8047	0.9952	#N/A	39.9+/-0.6	0.0001	1010.51	2	506.261	#N/A	40.05	1344737	505695	839042	20885	10779	10106	#N/A	0.002829	VACV			FALSE
20221010_MS_zenoSWATH_DC24_VACV_49C_r2.wiff	49C_r2	AAFEFINSL	9	C48H70N10O14	AAFEFINSL	AAFEFINSL	AAFEFINSL	AAFEFINSL	0.9616	0.9972	#N/A	39.9+/-0.6	0	1010.51	2	506.261	#N/A	40.05	1430980	473229	957751	3804	3174	630	#N/A	0.002306	VACV			FALSE
20221010_MS_zenoSWATH_DC24_VACV_49C_r3.wiff	49C_r3	AAFEFINSL	9	C48H70N10O14	AAFEFINSL	AAFEFINSL	AAFEFINSL	AAFEFINSL	0.9448	0.9933	#N/A	39.9+/-0.6	0	1010.51	2	506.261	#N/A	40.05	1149183	390696	758487	4964	2085	2879	#N/A	0.002603	VACV			FALSE
20221010_MS_zenoSWATH_DC24_VACV_53C_r1.wiff	53C_r1	AAFEFINSL	9	C48H70N10O14	AAFEFINSL	AAFEFINSL	AAFEFINSL	AAFEFINSL	0.7909	0.9908	#N/A	39.9+/-0.6	0	1010.51	2	506.261	#N/A	40.05	1043760	363270	680490	897	897	0	#N/A	0.001965	VACV			FALSE
20221010_MS_zenoSWATH_DC24_VACV_53C_r2.wiff	53C_r2	AAFEFINSL	9	C48H70N10O14	AAFEFINSL	AAFEFINSL	AAFEFINSL	AAFEFINSL	0.9293	0.9943	#N/A	39.9+/-0.6	0	1010.51	2	506.261	#N/A	40.05	800937	277916	523021	3727	3146	581	#N/A	0.001922	VACV			FALSE
20221010_MS_zenoSWATH_DC24_VACV_53C_r3.wiff	53C_r3	AAFEFINSL	9	C48H70N10O14	AAFEFINSL	AAFEFINSL	AAFEFINSL	AAFEFINSL	0.9406	0.9996	#N/A	39.9+/-0.6	0	1010.51	2	506.261	#N/A	40.05	644423	223872	420551	23	23	0	#N/A	0.002204	VACV			FALSE
20221010_MS_zenoSWATH_DC24_VACV_57C_r1.wiff	57C_r1	AAFEFINSL	9	C48H70N10O14	AAFEFINSL	AAFEFINSL	AAFEFINSL	AAFEFINSL	0.8799	0.9872	#N/A	39.9+/-0.6	0	1010.51	2	506.261	#N/A	40.05	90418	28868	61551	0	0	0	#N/A	0.000356	VACV			FALSE
20221010_MS_zenoSWATH_DC24_VACV_57C_r2.wiff	57C_r2	AAFEFINSL	9	C48H70N10O14	AAFEFINSL	AAFEFINSL	AAFEFINSL	AAFEFINSL	0.8558	0.9782	#N/A	39.9+/-0.6	0	1010.51	2	506.261	#N/A	40.05	35564	12181	23383	29	29	0	#N/A	0.000192	VACV			FALSE
20221010_MS_zenoSWATH_DC24_VACV_57C_r3.wiff	57C_r3	AAFEFINSL	9	C48H70N10O14	AAFEFINSL	AAFEFINSL	AAFEFINSL	AAFEFINSL	0.924	0.9734	#N/A	39.9+/-0.6	0	1010.51	2	506.261	#N/A	40.05	59140	17684	41456	0	0	0	#N/A	0.000243	VACV			FALSE
20221010_MS_zenoSWATH_DC24_VACV_61C_r1.wiff	61C_r1	AAFEFINSL	9	C48H70N10O14	AAFEFINSL	AAFEFINSL	AAFEFINSL	AAFEFINSL	0.7312	0.8129	#N/A	39.9+/-0.6	0.008	1010.51	2	506.261	#N/A	40.05	11926	3577	8349	0	0	0	#N/A	3e-05	VACV			FALSE
20221010_MS_zenoSWATH_DC24_VACV_61C_r2.wiff	61C_r2	AAFEFINSL	9	C48H70N10O14	AAFEFINSL	AAFEFINSL	AAFEFINSL	AAFEFINSL	0.7638	0.8422	#N/A	39.9+/-0.6	0.0781	1010.51	2	506.261	#N/A	40.05	6383	3326	3056	0	0	0	#N/A	1.9e-05	VACV			FALSE
20221010_MS_zenoSWATH_DC24_VACV_61C_r3.wiff	61C_r3	AAFEFINSL	9	C48H70N10O14	AAFEFINSL	AAFEFINSL	AAFEFINSL	AAFEFINSL	0.7193	0.6608	#N/A	39.9+/-0.6	0.218	1010.51	2	506.261	#N/A	40.05	8385	3702	4683	0	0	0	#N/A	2.8e-05	VACV			FALSE
20221010_MS_zenoSWATH_DC24_VACV_65C_r1.wiff	65C_r1	AAFEFINSL	9	C48H70N10O14	AAFEFINSL	AAFEFINSL	AAFEFINSL	AAFEFINSL	0.4968	0.3872	#N/A	39.9+/-0.6	0.2606	1010.51	2	506.261	#N/A	40.05	1023	485	538	0	0	0	#N/A	3e-06	VACV			FALSE
20221010_MS_zenoSWATH_DC24_VACV_65C_r2.wiff	65C_r2	AAFEFINSL	9	C48H70N10O14	AAFEFINSL	AAFEFINSL	AAFEFINSL	AAFEFINSL	0.2413	0.9543	#N/A	39.9+/-0.6	0.3997	1010.51	2	506.261	#N/A	40.05	531	394	138	0	0	0	#N/A	4e-06	VACV			FALSE
20221010_MS_zenoSWATH_DC24_VACV_65C_r3.wiff	65C_r3	AAFEFINSL	9	C48H70N10O14	AAFEFINSL	AAFEFINSL	AAFEFINSL	AAFEFINSL	0.5163	0.7097	#N/A	39.9+/-0.6	0.2925	1010.51	2	506.261	#N/A	40.05	817	392	425	54	54	0	#N/A	3e-06	VACV			FALSE
20221010_MS_zenoSWATH_DC24_VACV_69C_r1.wiff	69C_r1	AAFEFINSL	9	C48H70N10O14	AAFEFINSL	AAFEFINSL	AAFEFINSL	AAFEFINSL	0.2361	0.7226	#N/A	39.9+/-0.6	0.3995	1010.51	2	506.261	#N/A	40.05	758	294	463	0	0	0	#N/A	3e-06	VACV			FALSE
20221010_MS_zenoSWATH_DC24_VACV_69C_r2.wiff	69C_r2	AAFEFINSL	9	C48H70N10O14	AAFEFINSL	AAFEFINSL	AAFEFINSL	AAFEFINSL	0.703	0.7828	#N/A	39.9+/-0.6	0.0159	1010.51	2	506.261	#N/A	40.05	4963	1920	3043	0	0	0	#N/A	1.9e-05	VACV			FALSE
20221010_MS_zenoSWATH_DC24_VACV_69C_r3.wiff	69C_r3	AAFEFINSL	9	C48H70N10O14	AAFEFINSL	AAFEFINSL	AAFEFINSL	AAFEFINSL	0.374	0.7199	#N/A	39.9+/-0.6	0.2648	1010.51	2	506.261	#N/A	40.05	615	163	452	17	17	0	#N/A	5e-06	VACV			FALSE
20221010_MS_zenoSWATH_DC24_VACV_73C_r1.wiff	73C_r1	AAFEFINSL	9	C48H70N10O14	AAFEFINSL	AAFEFINSL	AAFEFINSL	AAFEFINSL	0.4199	0.595	#N/A	39.9+/-0.6	0.381	1010.51	2	506.261	#N/A	40.05	457	171	286	0	0	0	#N/A	3e-06	VACV			FALSE
20221010_MS_zenoSWATH_DC24_VACV_73C_r2.wiff	73C_r2	AAFEFINSL	9	C48H70N10O14	AAFEFINSL	AAFEFINSL	AAFEFINSL	AAFEFINSL	0.4286	0.9311	#N/A	39.9+/-0.6	0.3746	1010.51	2	506.261	#N/A	40.05	1160	904	255	21	21	0	#N/A	9e-06	VACV			FALSE
20221010_MS_zenoSWATH_DC24_VACV_73C_r3.wiff	73C_r3	AAFEFINSL	9	C48H70N10O14	AAFEFINSL	AAFEFINSL	AAFEFINSL	AAFEFINSL	0.7345	0.2141	#N/A	39.9+/-0.6	0.0214	1010.51	2	506.261	#N/A	40.05	1212	284	928	0	0	0	#N/A	4e-06	VACV			FALSE
20221010_MS_zenoSWATH_DC24_VACV_37C_r1.wiff	37C_r1	ITYRFYLI	8	C55H81N11O12	ITYRFYLI	ITYRFYLI	ITYRFYLI	ITYRFYLI	0.9818	0.9918	#N/A	36.03+/-0.02	0	1087.61	2	544.811	#N/A	36.03	1463990	443722	1020268	11476	4448	7028	#N/A	0.001555	VACV			FALSE
20221010_MS_zenoSWATH_DC24_VACV_37C_r2.wiff	37C_r2	ITYRFYLI	8	C55H81N11O12	ITYRFYLI	ITYRFYLI	ITYRFYLI	ITYRFYLI	0.9754	0.9949	#N/A	36.03+/-0.02	0	1087.61	2	544.811	#N/A	36.03	850738	256477	594261	2919	144	2775	#N/A	0.001336	VACV			FALSE
20221010_MS_zenoSWATH_DC24_VACV_37C_r3.wiff	37C_r3	ITYRFYLI	8	C55H81N11O12	ITYRFYLI	ITYRFYLI	ITYRFYLI	ITYRFYLI	0.9745	0.9944	#N/A	36.03+/-0.02	0	1087.61	2	544.811	#N/A	36.03	701962	209592	492371	18	18	0	#N/A	0.000918	VACV			FALSE
20221010_MS_zenoSWATH_DC24_VACV_41C_r1.wiff	41C_r1	ITYRFYLI	8	C55H81N11O12	ITYRFYLI	ITYRFYLI	ITYRFYLI	ITYRFYLI	0.9747	0.9972	#N/A	36.03+/-0.02	0	1087.61	2	544.811	#N/A	36.03	455208	137110	318098	207	207	0	#N/A	0.000555	VACV			FALSE
20221010_MS_zenoSWATH_DC24_VACV_41C_r2.wiff	41C_r2	ITYRFYLI	8	C55H81N11O12	ITYRFYLI	ITYRFYLI	ITYRFYLI	ITYRFYLI	0.9754	0.993	#N/A	36.03+/-0.02	0	1087.61	2	544.811	#N/A	36.03	707313	205871	501442	3223	775	2447	#N/A	0.001014	VACV			FALSE
20221010_MS_zenoSWATH_DC24_VACV_41C_r3.wiff	41C_r3	ITYRFYLI	8	C55H81N11O12	ITYRFYLI	ITYRFYLI	ITYRFYLI	ITYRFYLI	0.9755	0.9936	#N/A	36.03+/-0.02	0	1087.61	2	544.811	#N/A	36.03	998649	289145	709503	2217	2217	0	#N/A	0.00141	VACV			FALSE
20221010_MS_zenoSWATH_DC24_VACV_45C_r1.wiff	45C_r1	ITYRFYLI	8	C55H81N11O12	ITYRFYLI	ITYRFYLI	ITYRFYLI	ITYRFYLI	0.9752	0.9924	#N/A	36.03+/-0.02	0	1087.61	2	544.811	#N/A	36.03	1250498	389428	861071	17184	5160	12024	#N/A	0.001368	VACV			FALSE
20221010_MS_zenoSWATH_DC24_VACV_45C_r2.wiff	45C_r2	ITYRFYLI	8	C55H81N11O12	ITYRFYLI	ITYRFYLI	ITYRFYLI	ITYRFYLI	0.9759	0.99	#N/A	36.03+/-0.02	0	1087.61	2	544.811	#N/A	36.03	753308	228969	524340	1718	1568	150	#N/A	0.001307	VACV			FALSE
20221010_MS_zenoSWATH_DC24_VACV_45C_r3.wiff	45C_r3	ITYRFYLI	8	C55H81N11O12	ITYRFYLI	ITYRFYLI	ITYRFYLI	ITYRFYLI	0.98	0.9952	#N/A	36.03+/-0.02	0	1087.61	2	544.811	#N/A	36.03	1353891	415903	937988	4066	598	3468	#N/A	0.001561	VACV			FALSE
20221010_MS_zenoSWATH_DC24_VACV_49C_r1.wiff	49C_r1	ITYRFYLI	8	C55H81N11O12	ITYRFYLI	ITYRFYLI	ITYRFYLI	ITYRFYLI	0.9777	0.9973	#N/A	36.03+/-0.02	0	1087.61	2	544.811	#N/A	36.03	414069	123686	290383	245	245	0	#N/A	0.000871	VACV			FALSE
20221010_MS_zenoSWATH_DC24_VACV_49C_r2.wiff	49C_r2	ITYRFYLI	8	C55H81N11O12	ITYRFYLI	ITYRFYLI	ITYRFYLI	ITYRFYLI	0.9769	0.9943	#N/A	36.03+/-0.02	0	1087.61	2	544.811	#N/A	36.03	605356	178484	426872	3	3	0	#N/A	0.000975	VACV			FALSE
20221010_MS_zenoSWATH_DC24_VACV_49C_r3.wiff	49C_r3	ITYRFYLI	8	C55H81N11O12	ITYRFYLI	ITYRFYLI	ITYRFYLI	ITYRFYLI	0.9744	0.996	#N/A	36.03+/-0.02	0	1087.61	2	544.811	#N/A	36.03	196109	58112	137998	0	0	0	#N/A	0.000444	VACV			FALSE
20221010_MS_zenoSWATH_DC24_VACV_53C_r1.wiff	53C_r1	ITYRFYLI	8	C55H81N11O12	ITYRFYLI	ITYRFYLI	ITYRFYLI	ITYRFYLI	0.9714	0.9951	#N/A	36.03+/-0.02	0	1087.61	2	544.811	#N/A	36.03	471929	139498	332431	45	45	0	#N/A	0.000889	VACV			FALSE
20221010_MS_zenoSWATH_DC24_VACV_53C_r2.wiff	53C_r2	ITYRFYLI	8	C55H81N11O12	ITYRFYLI	ITYRFYLI	ITYRFYLI	ITYRFYLI	0.9599	0.9804	#N/A	36.03+/-0.02	0.0051	1087.61	2	544.811	#N/A	36.03	29051	8821	20230	0	0	0	#N/A	7e-05	VACV			FALSE
20221010_MS_zenoSWATH_DC24_VACV_53C_r3.wiff	53C_r3	ITYRFYLI	8	C55H81N11O12	ITYRFYLI	ITYRFYLI	ITYRFYLI	ITYRFYLI	0.9397	0.9849	#N/A	36.03+/-0.02	0.0003	1087.61	2	544.811	#N/A	36.03	88313	27399	60914	0	0	0	#N/A	0.000302	VACV			FALSE
20221010_MS_zenoSWATH_DC24_VACV_57C_r1.wiff	57C_r1	ITYRFYLI	8	C55H81N11O12	ITYRFYLI	ITYRFYLI	ITYRFYLI	ITYRFYLI	0.9708	0.9763	#N/A	36.03+/-0.02	0.0001	1087.61	2	544.811	#N/A	36.03	133621	43209	90412	24	24	0	#N/A	0.000526	VACV			FALSE
20221010_MS_zenoSWATH_DC24_VACV_57C_r2.wiff	57C_r2	ITYRFYLI	8	C55H81N11O12	ITYRFYLI	ITYRFYLI	ITYRFYLI	ITYRFYLI	0.9479	0.9554	#N/A	36.03+/-0.02	0	1087.61	2	544.811	#N/A	36.03	100991	29617	71374	0	0	0	#N/A	0.000546	VACV			FALSE
20221010_MS_zenoSWATH_DC24_VACV_57C_r3.wiff	57C_r3	ITYRFYLI	8	C55H81N11O12	ITYRFYLI	ITYRFYLI	ITYRFYLI	ITYRFYLI	0.9826	0.9481	#N/A	36.03+/-0.02	0	1087.61	2	544.811	#N/A	36.03	82468	25811	56657	879	879	0	#N/A	0.000339	VACV			FALSE
20221010_MS_zenoSWATH_DC24_VACV_61C_r1.wiff	61C_r1	ITYRFYLI	8	C55H81N11O12	ITYRFYLI	ITYRFYLI	ITYRFYLI	ITYRFYLI	0.9566	0.946	#N/A	36.03+/-0.02	0	1087.61	2	544.811	#N/A	36.03	174748	57085	117663	575	0	575	#N/A	0.000442	VACV			FALSE
20221010_MS_zenoSWATH_DC24_VACV_61C_r2.wiff	61C_r2	ITYRFYLI	8	C55H81N11O12	ITYRFYLI	ITYRFYLI	ITYRFYLI	ITYRFYLI	0.9467	0.9464	#N/A	36.03+/-0.02	0	1087.61	2	544.811	#N/A	36.03	144396	44935	99461	7	7	0	#N/A	0.000431	VACV			FALSE
20221010_MS_zenoSWATH_DC24_VACV_61C_r3.wiff	61C_r3	ITYRFYLI	8	C55H81N11O12	ITYRFYLI	ITYRFYLI	ITYRFYLI	ITYRFYLI	0.9598	0.962	#N/A	36.03+/-0.02	0	1087.61	2	544.811	#N/A	36.03	163241	50732	112509	784	784	0	#N/A	0.000551	VACV			FALSE
20221010_MS_zenoSWATH_DC24_VACV_65C_r1.wiff	65C_r1	ITYRFYLI	8	C55H81N11O12	ITYRFYLI	ITYRFYLI	ITYRFYLI	ITYRFYLI	0.9673	0.9719	#N/A	36.03+/-0.02	0	1087.61	2	544.811	#N/A	36.03	244958	77040	167917	0	0	0	#N/A	0.0008	VACV			FALSE
20221010_MS_zenoSWATH_DC24_VACV_65C_r2.wiff	65C_r2	ITYRFYLI	8	C55H81N11O12	ITYRFYLI	ITYRFYLI	ITYRFYLI	ITYRFYLI	0.9396	0.9751	#N/A	36.03+/-0.02	0	1087.61	2	544.811	#N/A	36.03	61016	18356	42660	0	0	0	#N/A	0.000418	VACV			FALSE
20221010_MS_zenoSWATH_DC24_VACV_65C_r3.wiff	65C_r3	ITYRFYLI	8	C55H81N11O12	ITYRFYLI	ITYRFYLI	ITYRFYLI	ITYRFYLI	0.9843	0.9696	#N/A	36.03+/-0.02	0	1087.61	2	544.811	#N/A	36.03	176225	55401	120825	19	19	0	#N/A	0.000551	VACV			FALSE
20221010_MS_zenoSWATH_DC24_VACV_69C_r1.wiff	69C_r1	ITYRFYLI	8	C55H81N11O12	ITYRFYLI	ITYRFYLI	ITYRFYLI	ITYRFYLI	0.9744	0.9585	#N/A	36.03+/-0.02	0	1087.61	2	544.811	#N/A	36.03	274427	89235	185191	90	90	0	#N/A	0.001084	VACV			FALSE
20221010_MS_zenoSWATH_DC24_VACV_69C_r2.wiff	69C_r2	ITYRFYLI	8	C55H81N11O12	ITYRFYLI	ITYRFYLI	ITYRFYLI	ITYRFYLI	0.9633	0.9515	#N/A	36.03+/-0.02	0	1087.61	2	544.811	#N/A	36.03	319893	98898	220995	0	0	0	#N/A	0.001198	VACV			FALSE
20221010_MS_zenoSWATH_DC24_VACV_69C_r3.wiff	69C_r3	ITYRFYLI	8	C55H81N11O12	ITYRFYLI	ITYRFYLI	ITYRFYLI	ITYRFYLI	0.979	0.9743	#N/A	36.03+/-0.02	0	1087.61	2	544.811	#N/A	36.03	117399	36122	81277	11	11	0	#N/A	0.001015	VACV			FALSE
20221010_MS_zenoSWATH_DC24_VACV_73C_r1.wiff	73C_r1	ITYRFYLI	8	C55H81N11O12	ITYRFYLI	ITYRFYLI	ITYRFYLI	ITYRFYLI	0.9667	0.9415	#N/A	36.03+/-0.02	0	1087.61	2	544.811	#N/A	36.03	189899	57303	132596	47	47	0	#N/A	0.001169	VACV			FALSE
20221010_MS_zenoSWATH_DC24_VACV_73C_r2.wiff	73C_r2	ITYRFYLI	8	C55H81N11O12	ITYRFYLI	ITYRFYLI	ITYRFYLI	ITYRFYLI	0.971	0.9467	#N/A	36.03+/-0.02	0	1087.61	2	544.811	#N/A	36.03	211659	67596	144063	819	284	535	#N/A	0.001712	VACV			FALSE
20221010_MS_zenoSWATH_DC24_VACV_73C_r3.wiff	73C_r3	ITYRFYLI	8	C55H81N11O12	ITYRFYLI	ITYRFYLI	ITYRFYLI	ITYRFYLI	0.9845	0.9589	#N/A	36.03+/-0.02	0	1087.61	2	544.811	#N/A	36.03	510008	159610	350398	5247	0	5247	#N/A	0.001886	VACV			FALSE
20221010_MS_zenoSWATH_DC24_VACV_37C_r1.wiff	37C_r1	KSYNYMLL	8	C48H74N10O13S	KSYNYMLL	KSYNYMLL	KSYNYMLL	KSYNYMLL	0.9707	0.9823	#N/A	28.14+/-1.55	0	1030.52	2	516.265	#N/A	28.23	53500	14394	39105	0	0	0	#N/A	5.7e-05	VACV			FALSE
20221010_MS_zenoSWATH_DC24_VACV_37C_r2.wiff	37C_r2	KSYNYMLL	8	C48H74N10O13S	KSYNYMLL	KSYNYMLL	KSYNYMLL	KSYNYMLL	0.9742	0.9961	#N/A	28.14+/-1.55	0	1030.52	2	516.265	#N/A	28.23	259685	67953	191732	1293	0	1293	#N/A	0.000408	VACV			FALSE
20221010_MS_zenoSWATH_DC24_VACV_37C_r3.wiff	37C_r3	KSYNYMLL	8	C48H74N10O13S	KSYNYMLL	KSYNYMLL	KSYNYMLL	KSYNYMLL	0.9518	0.9753	#N/A	28.14+/-1.55	0	1030.52	2	516.265	#N/A	28.23	48708	13345	35363	0	0	0	#N/A	6.4e-05	VACV			FALSE
20221010_MS_zenoSWATH_DC24_VACV_41C_r1.wiff	41C_r1	KSYNYMLL	8	C48H74N10O13S	KSYNYMLL	KSYNYMLL	KSYNYMLL	KSYNYMLL	0.9532	0.9976	#N/A	28.14+/-1.55	0	1030.52	2	516.265	#N/A	28.23	110024	29213	80811	0	0	0	#N/A	0.000134	VACV			FALSE
20221010_MS_zenoSWATH_DC24_VACV_41C_r2.wiff	41C_r2	KSYNYMLL	8	C48H74N10O13S	KSYNYMLL	KSYNYMLL	KSYNYMLL	KSYNYMLL	0.9645	0.9845	#N/A	28.14+/-1.55	0	1030.52	2	516.265	#N/A	28.23	150775	38255	112520	0	0	0	#N/A	0.000216	VACV			FALSE
20221010_MS_zenoSWATH_DC24_VACV_41C_r3.wiff	41C_r3	KSYNYMLL	8	C48H74N10O13S	KSYNYMLL	KSYNYMLL	KSYNYMLL	KSYNYMLL	0.9573	0.9887	#N/A	28.14+/-1.55	0	1030.52	2	516.265	#N/A	28.23	102059	27144	74915	0	0	0	#N/A	0.000144	VACV			FALSE
20221010_MS_zenoSWATH_DC24_VACV_45C_r1.wiff	45C_r1	KSYNYMLL	8	C48H74N10O13S	KSYNYMLL	KSYNYMLL	KSYNYMLL	KSYNYMLL	0.943	0.9938	#N/A	28.14+/-1.55	0	1030.52	2	516.265	#N/A	28.23	92358	24942	67416	0	0	0	#N/A	0.000101	VACV			FALSE
20221010_MS_zenoSWATH_DC24_VACV_45C_r2.wiff	45C_r2	KSYNYMLL	8	C48H74N10O13S	KSYNYMLL	KSYNYMLL	KSYNYMLL	KSYNYMLL	0.9343	0.9777	#N/A	28.14+/-1.55	0	1030.52	2	516.265	#N/A	28.23	92975	23981	68995	0	0	0	#N/A	0.000161	VACV			FALSE
20221010_MS_zenoSWATH_DC24_VACV_45C_r3.wiff	45C_r3	KSYNYMLL	8	C48H74N10O13S	KSYNYMLL	KSYNYMLL	KSYNYMLL	KSYNYMLL	0.9642	0.9864	#N/A	28.14+/-1.55	0	1030.52	2	516.265	#N/A	28.23	140568	35685	104883	0	0	0	#N/A	0.000162	VACV			FALSE
20221010_MS_zenoSWATH_DC24_VACV_49C_r1.wiff	49C_r1	KSYNYMLL	8	C48H74N10O13S	KSYNYMLL	KSYNYMLL	KSYNYMLL	KSYNYMLL	0.9434	0.9778	#N/A	28.14+/-1.55	0.0005	1030.52	2	516.265	#N/A	28.23	56607	15848	40759	0	0	0	#N/A	0.000119	VACV			FALSE
20221010_MS_zenoSWATH_DC24_VACV_49C_r2.wiff	49C_r2	KSYNYMLL	8	C48H74N10O13S	KSYNYMLL	KSYNYMLL	KSYNYMLL	KSYNYMLL	0.9758	0.9912	#N/A	28.14+/-1.55	0	1030.52	2	516.265	#N/A	28.23	108672	25457	83214	0	0	0	#N/A	0.000175	VACV			FALSE
20221010_MS_zenoSWATH_DC24_VACV_49C_r3.wiff	49C_r3	KSYNYMLL	8	C48H74N10O13S	KSYNYMLL	KSYNYMLL	KSYNYMLL	KSYNYMLL	0.9368	0.9819	#N/A	28.14+/-1.55	0	1030.52	2	516.265	#N/A	28.23	69725	18915	50810	0	0	0	#N/A	0.000158	VACV			FALSE
20221010_MS_zenoSWATH_DC24_VACV_53C_r1.wiff	53C_r1	KSYNYMLL	8	C48H74N10O13S	KSYNYMLL	KSYNYMLL	KSYNYMLL	KSYNYMLL	0.9005	0.9651	#N/A	28.14+/-1.55	0.0011	1030.52	2	516.265	#N/A	28.23	21758	6940	14818	0	0	0	#N/A	4.1e-05	VACV			FALSE
20221010_MS_zenoSWATH_DC24_VACV_53C_r2.wiff	53C_r2	KSYNYMLL	8	C48H74N10O13S	KSYNYMLL	KSYNYMLL	KSYNYMLL	KSYNYMLL	0.8755	0.957	#N/A	28.14+/-1.55	0.0148	1030.52	2	516.265	#N/A	28.23	23981	7757	16223	0	0	0	#N/A	5.8e-05	VACV			FALSE
20221010_MS_zenoSWATH_DC24_VACV_53C_r3.wiff	53C_r3	KSYNYMLL	8	C48H74N10O13S	KSYNYMLL	KSYNYMLL	KSYNYMLL	KSYNYMLL	0.7991	0.8853	#N/A	28.14+/-1.55	0.2076	1030.52	2	516.265	#N/A	28.23	4166	1978	2188	0	0	0	#N/A	1.4e-05	VACV			FALSE
20221010_MS_zenoSWATH_DC24_VACV_57C_r1.wiff	57C_r1	KSYNYMLL	8	C48H74N10O13S	KSYNYMLL	KSYNYMLL	KSYNYMLL	KSYNYMLL	0.8893	0.9633	#N/A	28.14+/-1.55	0.0994	1030.52	2	516.265	#N/A	28.23	18893	6037	12856	0	0	0	#N/A	7.4e-05	VACV			FALSE
20221010_MS_zenoSWATH_DC24_VACV_57C_r2.wiff	57C_r2	KSYNYMLL	8	C48H74N10O13S	KSYNYMLL	KSYNYMLL	KSYNYMLL	KSYNYMLL	0.3595	0.6982	#N/A	28.14+/-1.55	0.1831	1030.52	2	516.265	#N/A	28.23	1881	748	1132	55	55	0	#N/A	1e-05	VACV			FALSE
20221010_MS_zenoSWATH_DC24_VACV_57C_r3.wiff	57C_r3	KSYNYMLL	8	C48H74N10O13S	KSYNYMLL	KSYNYMLL	KSYNYMLL	KSYNYMLL	0.6891	0.3835	#N/A	28.14+/-1.55	0.0234	1030.52	2	516.265	#N/A	28.23	1824	18	1805	0	0	0	#N/A	8e-06	VACV			FALSE
20221010_MS_zenoSWATH_DC24_VACV_61C_r1.wiff	61C_r1	KSYNYMLL	8	C48H74N10O13S	KSYNYMLL	KSYNYMLL	KSYNYMLL	KSYNYMLL	0.3027	0.6396	#N/A	28.14+/-1.55	0.1019	1030.52	2	516.265	#N/A	28.23	4558	2346	2213	0	0	0	#N/A	1.2e-05	VACV			FALSE
20221010_MS_zenoSWATH_DC24_VACV_61C_r2.wiff	61C_r2	KSYNYMLL	8	C48H74N10O13S	KSYNYMLL	KSYNYMLL	KSYNYMLL	KSYNYMLL	0.6387	0.7653	#N/A	28.14+/-1.55	0.0562	1030.52	2	516.265	#N/A	28.23	6751	1878	4874	671	671	0	#N/A	2e-05	VACV			FALSE
20221010_MS_zenoSWATH_DC24_VACV_61C_r3.wiff	61C_r3	KSYNYMLL	8	C48H74N10O13S	KSYNYMLL	KSYNYMLL	KSYNYMLL	KSYNYMLL	0.3274	0.6743	#N/A	28.14+/-1.55	0.0424	1030.52	2	516.265	#N/A	28.23	7446	2120	5325	0	0	0	#N/A	2.5e-05	VACV			FALSE
20221010_MS_zenoSWATH_DC24_VACV_65C_r1.wiff	65C_r1	KSYNYMLL	8	C48H74N10O13S	KSYNYMLL	KSYNYMLL	KSYNYMLL	KSYNYMLL	0.1592	0.8473	#N/A	28.14+/-1.55	0.2486	1030.52	2	516.265	#N/A	28.23	1978	891	1087	0	0	0	#N/A	6e-06	VACV			FALSE
20221010_MS_zenoSWATH_DC24_VACV_65C_r2.wiff	65C_r2	KSYNYMLL	8	C48H74N10O13S	KSYNYMLL	KSYNYMLL	KSYNYMLL	KSYNYMLL	0.1313	0.2953	#N/A	28.14+/-1.55	0.2947	1030.52	2	516.265	#N/A	28.23	570	76	493	0	0	0	#N/A	4e-06	VACV			FALSE
20221010_MS_zenoSWATH_DC24_VACV_65C_r3.wiff	65C_r3	KSYNYMLL	8	C48H74N10O13S	KSYNYMLL	KSYNYMLL	KSYNYMLL	KSYNYMLL	0.2474	0.9481	#N/A	28.14+/-1.55	0.2492	1030.52	2	516.265	#N/A	28.23	1965	638	1327	0	0	0	#N/A	6e-06	VACV			FALSE
20221010_MS_zenoSWATH_DC24_VACV_69C_r1.wiff	69C_r1	KSYNYMLL	8	C48H74N10O13S	KSYNYMLL	KSYNYMLL	KSYNYMLL	KSYNYMLL	0.2146	0.8685	#N/A	28.14+/-1.55	0.1877	1030.52	2	516.265	#N/A	28.23	5290	3827	1463	84	84	0	#N/A	2.1e-05	VACV			FALSE
20221010_MS_zenoSWATH_DC24_VACV_69C_r2.wiff	69C_r2	KSYNYMLL	8	C48H74N10O13S	KSYNYMLL	KSYNYMLL	KSYNYMLL	KSYNYMLL	0.4712	0.551	#N/A	28.14+/-1.55	0.114	1030.52	2	516.265	#N/A	28.23	2304	522	1782	85	0	85	#N/A	9e-06	VACV			FALSE
20221010_MS_zenoSWATH_DC24_VACV_69C_r3.wiff	69C_r3	KSYNYMLL	8	C48H74N10O13S	KSYNYMLL	KSYNYMLL	KSYNYMLL	KSYNYMLL	0.1233	0.7558	#N/A	28.14+/-1.55	0.2629	1030.52	2	516.265	#N/A	28.23	1174	346	828	0	0	0	#N/A	1e-05	VACV			FALSE
20221010_MS_zenoSWATH_DC24_VACV_73C_r1.wiff	73C_r1	KSYNYMLL	8	C48H74N10O13S	KSYNYMLL	KSYNYMLL	KSYNYMLL	KSYNYMLL	0.1312	0.445	#N/A	28.14+/-1.55	0.2762	1030.52	2	516.265	#N/A	28.23	1192	116	1076	1	1	0	#N/A	7e-06	VACV			FALSE
20221010_MS_zenoSWATH_DC24_VACV_73C_r2.wiff	73C_r2	KSYNYMLL	8	C48H74N10O13S	KSYNYMLL	KSYNYMLL	KSYNYMLL	KSYNYMLL	0.227	0.8281	#N/A	28.14+/-1.55	0.124	1030.52	2	516.265	#N/A	28.23	877	435	443	18	18	0	#N/A	7e-06	VACV			FALSE
20221010_MS_zenoSWATH_DC24_VACV_73C_r3.wiff	73C_r3	KSYNYMLL	8	C48H74N10O13S	KSYNYMLL	KSYNYMLL	KSYNYMLL	KSYNYMLL	0.6065	0.8568	#N/A	28.14+/-1.55	0.0186	1030.52	2	516.265	#N/A	28.23	5121	2990	2131	0	0	0	#N/A	1.9e-05	VACV			FALSE
20221010_MS_zenoSWATH_DC24_VACV_37C_r1.wiff	37C_r1	KSYNYMLL	8	C48H73N9O14S	KSYN[+1]YMLL	KSYN(unimod:7)YMLL	KSYN[Dea]YMLL	KSYN[Deamidated (NQ)]YMLL	0.718	0.9838	#N/A	30.74+/-1.99	0.0032	1031.5	2	516.757	#N/A	31.35	438237	316490	121747	0	0	0	#N/A	0.000466	VACV			FALSE
20221010_MS_zenoSWATH_DC24_VACV_37C_r2.wiff	37C_r2	KSYNYMLL	8	C48H73N9O14S	KSYN[+1]YMLL	KSYN(unimod:7)YMLL	KSYN[Dea]YMLL	KSYN[Deamidated (NQ)]YMLL	0.9398	0.4536	#N/A	30.74+/-1.99	0.0003	1031.5	2	516.757	#N/A	31.35	90875	2712	88163	0	0	0	#N/A	0.000143	VACV			FALSE
20221010_MS_zenoSWATH_DC24_VACV_37C_r3.wiff	37C_r3	KSYNYMLL	8	C48H73N9O14S	KSYN[+1]YMLL	KSYN(unimod:7)YMLL	KSYN[Dea]YMLL	KSYN[Deamidated (NQ)]YMLL	0.7256	0.9884	#N/A	30.74+/-1.99	0.003	1031.5	2	516.757	#N/A	31.35	354630	259133	95497	1370	1370	0	#N/A	0.000464	VACV			FALSE
20221010_MS_zenoSWATH_DC24_VACV_41C_r1.wiff	41C_r1	KSYNYMLL	8	C48H73N9O14S	KSYN[+1]YMLL	KSYN(unimod:7)YMLL	KSYN[Dea]YMLL	KSYN[Deamidated (NQ)]YMLL	0.7223	0.979	#N/A	30.74+/-1.99	0.0034	1031.5	2	516.757	#N/A	31.35	328503	235760	92743	0	0	0	#N/A	0.0004	VACV			FALSE
20221010_MS_zenoSWATH_DC24_VACV_41C_r2.wiff	41C_r2	KSYNYMLL	8	C48H73N9O14S	KSYN[+1]YMLL	KSYN(unimod:7)YMLL	KSYN[Dea]YMLL	KSYN[Deamidated (NQ)]YMLL	0.6939	0.983	#N/A	30.74+/-1.99	0.0064	1031.5	2	516.757	#N/A	31.35	300641	214886	85756	0	0	0	#N/A	0.000431	VACV			FALSE
20221010_MS_zenoSWATH_DC24_VACV_41C_r3.wiff	41C_r3	KSYNYMLL	8	C48H73N9O14S	KSYN[+1]YMLL	KSYN(unimod:7)YMLL	KSYN[Dea]YMLL	KSYN[Deamidated (NQ)]YMLL	0.7104	0.9849	#N/A	30.74+/-1.99	0.007	1031.5	2	516.757	#N/A	31.35	246554	176986	69568	0	0	0	#N/A	0.000348	VACV			FALSE
20221010_MS_zenoSWATH_DC24_VACV_45C_r1.wiff	45C_r1	KSYNYMLL	8	C48H73N9O14S	KSYN[+1]YMLL	KSYN(unimod:7)YMLL	KSYN[Dea]YMLL	KSYN[Deamidated (NQ)]YMLL	0.8759	0.2871	#N/A	30.74+/-1.99	0.0007	1031.5	2	516.757	#N/A	31.35	25596	1534	24061	0	0	0	#N/A	2.8e-05	VACV			FALSE
20221010_MS_zenoSWATH_DC24_VACV_45C_r2.wiff	45C_r2	KSYNYMLL	8	C48H73N9O14S	KSYN[+1]YMLL	KSYN(unimod:7)YMLL	KSYN[Dea]YMLL	KSYN[Deamidated (NQ)]YMLL	0.9244	0.6427	#N/A	30.74+/-1.99	0.0035	1031.5	2	516.757	#N/A	31.35	31232	2328	28904	0	0	0	#N/A	5.4e-05	VACV			FALSE
20221010_MS_zenoSWATH_DC24_VACV_45C_r3.wiff	45C_r3	KSYNYMLL	8	C48H73N9O14S	KSYN[+1]YMLL	KSYN(unimod:7)YMLL	KSYN[Dea]YMLL	KSYN[Deamidated (NQ)]YMLL	0.9062	0.451	#N/A	30.74+/-1.99	0.0041	1031.5	2	516.757	#N/A	31.35	43763	2557	41206	0	0	0	#N/A	5e-05	VACV			FALSE
20221010_MS_zenoSWATH_DC24_VACV_49C_r1.wiff	49C_r1	KSYNYMLL	8	C48H73N9O14S	KSYN[+1]YMLL	KSYN(unimod:7)YMLL	KSYN[Dea]YMLL	KSYN[Deamidated (NQ)]YMLL	0.6865	0.9877	#N/A	30.74+/-1.99	0.006	1031.5	2	516.757	#N/A	31.35	187117	135301	51817	0	0	0	#N/A	0.000394	VACV			FALSE
20221010_MS_zenoSWATH_DC24_VACV_49C_r2.wiff	49C_r2	KSYNYMLL	8	C48H73N9O14S	KSYN[+1]YMLL	KSYN(unimod:7)YMLL	KSYN[Dea]YMLL	KSYN[Deamidated (NQ)]YMLL	0.9303	0.8043	#N/A	30.74+/-1.99	0.0066	1031.5	2	516.757	#N/A	31.35	34675	2990	31686	0	0	0	#N/A	5.6e-05	VACV			FALSE
20221010_MS_zenoSWATH_DC24_VACV_49C_r3.wiff	49C_r3	KSYNYMLL	8	C48H73N9O14S	KSYN[+1]YMLL	KSYN(unimod:7)YMLL	KSYN[Dea]YMLL	KSYN[Deamidated (NQ)]YMLL	0.7158	0.9833	#N/A	30.74+/-1.99	0.0087	1031.5	2	516.757	#N/A	31.35	162234	116731	45503	0	0	0	#N/A	0.000367	VACV			FALSE
20221010_MS_zenoSWATH_DC24_VACV_53C_r1.wiff	53C_r1	KSYNYMLL	8	C48H73N9O14S	KSYN[+1]YMLL	KSYN(unimod:7)YMLL	KSYN[Dea]YMLL	KSYN[Deamidated (NQ)]YMLL	0.7061	0.9913	#N/A	30.74+/-1.99	0.006	1031.5	2	516.757	#N/A	31.35	192769	145331	47439	19	19	0	#N/A	0.000363	VACV			FALSE
20221010_MS_zenoSWATH_DC24_VACV_53C_r2.wiff	53C_r2	KSYNYMLL	8	C48H73N9O14S	KSYN[+1]YMLL	KSYN(unimod:7)YMLL	KSYN[Dea]YMLL	KSYN[Deamidated (NQ)]YMLL	0.732	0.9927	#N/A	30.74+/-1.99	0.0029	1031.5	2	516.757	#N/A	31.35	154075	114368	39708	0	0	0	#N/A	0.00037	VACV			FALSE
20221010_MS_zenoSWATH_DC24_VACV_53C_r3.wiff	53C_r3	KSYNYMLL	8	C48H73N9O14S	KSYN[+1]YMLL	KSYN(unimod:7)YMLL	KSYN[Dea]YMLL	KSYN[Deamidated (NQ)]YMLL	0.7172	0.9943	#N/A	30.74+/-1.99	0.001	1031.5	2	516.757	#N/A	31.35	111860	82082	29777	217	217	0	#N/A	0.000383	VACV			FALSE
20221010_MS_zenoSWATH_DC24_VACV_57C_r1.wiff	57C_r1	KSYNYMLL	8	C48H73N9O14S	KSYN[+1]YMLL	KSYN(unimod:7)YMLL	KSYN[Dea]YMLL	KSYN[Deamidated (NQ)]YMLL	0.63	0.9268	#N/A	30.74+/-1.99	0.0168	1031.5	2	516.757	#N/A	31.35	12611	8677	3935	859	859	0	#N/A	5e-05	VACV			FALSE
20221010_MS_zenoSWATH_DC24_VACV_57C_r2.wiff	57C_r2	KSYNYMLL	8	C48H73N9O14S	KSYN[+1]YMLL	KSYN(unimod:7)YMLL	KSYN[Dea]YMLL	KSYN[Deamidated (NQ)]YMLL	0.4932	0.9365	#N/A	30.74+/-1.99	0.2408	1031.5	2	516.757	#N/A	31.35	9348	7831	1518	358	358	0	#N/A	5.1e-05	VACV			FALSE
20221010_MS_zenoSWATH_DC24_VACV_57C_r3.wiff	57C_r3	KSYNYMLL	8	C48H73N9O14S	KSYN[+1]YMLL	KSYN(unimod:7)YMLL	KSYN[Dea]YMLL	KSYN[Deamidated (NQ)]YMLL	0.7303	0.9025	#N/A	30.74+/-1.99	0.2607	1031.5	2	516.757	#N/A	31.35	10003	8439	1564	0	0	0	#N/A	4.1e-05	VACV			FALSE
20221010_MS_zenoSWATH_DC24_VACV_61C_r1.wiff	61C_r1	KSYNYMLL	8	C48H73N9O14S	KSYN[+1]YMLL	KSYN(unimod:7)YMLL	KSYN[Dea]YMLL	KSYN[Deamidated (NQ)]YMLL	0.5449	0.4684	#N/A	30.74+/-1.99	0.1585	1031.5	2	516.757	#N/A	31.35	2524	606	1918	0	0	0	#N/A	6e-06	VACV			FALSE
20221010_MS_zenoSWATH_DC24_VACV_61C_r2.wiff	61C_r2	KSYNYMLL	8	C48H73N9O14S	KSYN[+1]YMLL	KSYN(unimod:7)YMLL	KSYN[Dea]YMLL	KSYN[Deamidated (NQ)]YMLL	0.7129	0.787	#N/A	30.74+/-1.99	0.1813	1031.5	2	516.757	#N/A	31.35	2346	872	1475	87	87	0	#N/A	7e-06	VACV			FALSE
20221010_MS_zenoSWATH_DC24_VACV_61C_r3.wiff	61C_r3	KSYNYMLL	8	C48H73N9O14S	KSYN[+1]YMLL	KSYN(unimod:7)YMLL	KSYN[Dea]YMLL	KSYN[Deamidated (NQ)]YMLL	0.5099	0.5251	#N/A	30.74+/-1.99	0.2127	1031.5	2	516.757	#N/A	31.35	640	199	442	178	178	0	#N/A	2e-06	VACV			FALSE
20221010_MS_zenoSWATH_DC24_VACV_65C_r1.wiff	65C_r1	KSYNYMLL	8	C48H73N9O14S	KSYN[+1]YMLL	KSYN(unimod:7)YMLL	KSYN[Dea]YMLL	KSYN[Deamidated (NQ)]YMLL	0.2818	0.6123	#N/A	30.74+/-1.99	0.2924	1031.5	2	516.757	#N/A	31.35	2288	1391	897	221	221	0	#N/A	7e-06	VACV			FALSE
20221010_MS_zenoSWATH_DC24_VACV_65C_r2.wiff	65C_r2	KSYNYMLL	8	C48H73N9O14S	KSYN[+1]YMLL	KSYN(unimod:7)YMLL	KSYN[Dea]YMLL	KSYN[Deamidated (NQ)]YMLL	0.1783	0.5898	#N/A	30.74+/-1.99	0.3995	1031.5	2	516.757	#N/A	31.35	200	55	145	18	18	0	#N/A	1e-06	VACV			FALSE
20221010_MS_zenoSWATH_DC24_VACV_65C_r3.wiff	65C_r3	KSYNYMLL	8	C48H73N9O14S	KSYN[+1]YMLL	KSYN(unimod:7)YMLL	KSYN[Dea]YMLL	KSYN[Deamidated (NQ)]YMLL	0.1731	0.576	#N/A	30.74+/-1.99	0.2658	1031.5	2	516.757	#N/A	31.35	613	218	395	32	32	0	#N/A	2e-06	VACV			FALSE
20221010_MS_zenoSWATH_DC24_VACV_69C_r1.wiff	69C_r1	KSYNYMLL	8	C48H73N9O14S	KSYN[+1]YMLL	KSYN(unimod:7)YMLL	KSYN[Dea]YMLL	KSYN[Deamidated (NQ)]YMLL	0.5588	0.8343	#N/A	30.74+/-1.99	0.0448	1031.5	2	516.757	#N/A	31.35	8887	2417	6470	0	0	0	#N/A	3.5e-05	VACV			FALSE
20221010_MS_zenoSWATH_DC24_VACV_69C_r2.wiff	69C_r2	KSYNYMLL	8	C48H73N9O14S	KSYN[+1]YMLL	KSYN(unimod:7)YMLL	KSYN[Dea]YMLL	KSYN[Deamidated (NQ)]YMLL	0.3809	0.7209	#N/A	30.74+/-1.99	0.2672	1031.5	2	516.757	#N/A	31.35	2000	366	1633	0	0	0	#N/A	7e-06	VACV			FALSE
20221010_MS_zenoSWATH_DC24_VACV_69C_r3.wiff	69C_r3	KSYNYMLL	8	C48H73N9O14S	KSYN[+1]YMLL	KSYN(unimod:7)YMLL	KSYN[Dea]YMLL	KSYN[Deamidated (NQ)]YMLL	0.1783	0.4194	#N/A	30.74+/-1.99	0.4022	1031.5	2	516.757	#N/A	31.35	594	11	583	0	0	0	#N/A	5e-06	VACV			FALSE
20221010_MS_zenoSWATH_DC24_VACV_73C_r1.wiff	73C_r1	KSYNYMLL	8	C48H73N9O14S	KSYN[+1]YMLL	KSYN(unimod:7)YMLL	KSYN[Dea]YMLL	KSYN[Deamidated (NQ)]YMLL	0.4539	0.935	#N/A	30.74+/-1.99	0.3297	1031.5	2	516.757	#N/A	31.35	2234	426	1808	0	0	0	#N/A	1.4e-05	VACV			FALSE
20221010_MS_zenoSWATH_DC24_VACV_73C_r2.wiff	73C_r2	KSYNYMLL	8	C48H73N9O14S	KSYN[+1]YMLL	KSYN(unimod:7)YMLL	KSYN[Dea]YMLL	KSYN[Deamidated (NQ)]YMLL	0.4824	0.8767	#N/A	30.74+/-1.99	0.1634	1031.5	2	516.757	#N/A	31.35	6048	1684	4365	0	0	0	#N/A	4.9e-05	VACV			FALSE
20221010_MS_zenoSWATH_DC24_VACV_73C_r3.wiff	73C_r3	KSYNYMLL	8	C48H73N9O14S	KSYN[+1]YMLL	KSYN(unimod:7)YMLL	KSYN[Dea]YMLL	KSYN[Deamidated (NQ)]YMLL	0.6141	0.835	#N/A	30.74+/-1.99	0.0319	1031.5	2	516.757	#N/A	31.35	11536	3242	8294	61	61	0	#N/A	4.3e-05	VACV			FALSE
20221010_MS_zenoSWATH_DC24_VACV_37C_r1.wiff	37C_r1	KSYNYMLL	8	C48H74N10O14S	KSYNYM[+16]LL	KSYNYM(unimod:35)LL	KSYNYM[Oxi]LL	KSYNYM[Oxidation (M)]LL	0.9618	0.996	#N/A	24.38+/-1.05	0	1046.51	2	524.263	#N/A	23.91	821934	276282	545652	12673	6211	6462	#N/A	0.000873	VACV			FALSE
20221010_MS_zenoSWATH_DC24_VACV_37C_r2.wiff	37C_r2	KSYNYMLL	8	C48H74N10O14S	KSYNYM[+16]LL	KSYNYM(unimod:35)LL	KSYNYM[Oxi]LL	KSYNYM[Oxidation (M)]LL	0.9562	0.9874	#N/A	24.38+/-1.05	0	1046.51	2	524.263	#N/A	23.91	404938	127422	277515	1708	1708	0	#N/A	0.000636	VACV			FALSE
20221010_MS_zenoSWATH_DC24_VACV_37C_r3.wiff	37C_r3	KSYNYMLL	8	C48H74N10O14S	KSYNYM[+16]LL	KSYNYM(unimod:35)LL	KSYNYM[Oxi]LL	KSYNYM[Oxidation (M)]LL	0.9656	0.9892	#N/A	24.38+/-1.05	0	1046.51	2	524.263	#N/A	23.91	658121	211560	446561	5192	5192	0	#N/A	0.000861	VACV			FALSE
20221010_MS_zenoSWATH_DC24_VACV_41C_r1.wiff	41C_r1	KSYNYMLL	8	C48H74N10O14S	KSYNYM[+16]LL	KSYNYM(unimod:35)LL	KSYNYM[Oxi]LL	KSYNYM[Oxidation (M)]LL	0.9575	0.9927	#N/A	24.38+/-1.05	0	1046.51	2	524.263	#N/A	23.91	527233	176123	351109	17979	10679	7300	#N/A	0.000643	VACV			FALSE
20221010_MS_zenoSWATH_DC24_VACV_41C_r2.wiff	41C_r2	KSYNYMLL	8	C48H74N10O14S	KSYNYM[+16]LL	KSYNYM(unimod:35)LL	KSYNYM[Oxi]LL	KSYNYM[Oxidation (M)]LL	0.9641	0.9844	#N/A	24.38+/-1.05	0	1046.51	2	524.263	#N/A	23.91	607637	184066	423571	9084	7613	1471	#N/A	0.000871	VACV			FALSE
20221010_MS_zenoSWATH_DC24_VACV_41C_r3.wiff	41C_r3	KSYNYMLL	8	C48H74N10O14S	KSYNYM[+16]LL	KSYNYM(unimod:35)LL	KSYNYM[Oxi]LL	KSYNYM[Oxidation (M)]LL	0.9625	0.9927	#N/A	24.38+/-1.05	0	1046.51	2	524.263	#N/A	23.91	770816	250666	520150	800	800	0	#N/A	0.001088	VACV			FALSE
20221010_MS_zenoSWATH_DC24_VACV_45C_r1.wiff	45C_r1	KSYNYMLL	8	C48H74N10O14S	KSYNYM[+16]LL	KSYNYM(unimod:35)LL	KSYNYM[Oxi]LL	KSYNYM[Oxidation (M)]LL	0.9525	0.9973	#N/A	24.38+/-1.05	0	1046.51	2	524.263	#N/A	23.91	728311	238590	489721	2652	2652	0	#N/A	0.000797	VACV			FALSE
20221010_MS_zenoSWATH_DC24_VACV_45C_r2.wiff	45C_r2	KSYNYMLL	8	C48H74N10O14S	KSYNYM[+16]LL	KSYNYM(unimod:35)LL	KSYNYM[Oxi]LL	KSYNYM[Oxidation (M)]LL	0.9515	0.9843	#N/A	24.38+/-1.05	0	1046.51	2	524.263	#N/A	23.91	449356	135934	313422	8455	5409	3046	#N/A	0.00078	VACV			FALSE
20221010_MS_zenoSWATH_DC24_VACV_45C_r3.wiff	45C_r3	KSYNYMLL	8	C48H74N10O14S	KSYNYM[+16]LL	KSYNYM(unimod:35)LL	KSYNYM[Oxi]LL	KSYNYM[Oxidation (M)]LL	0.9582	0.9892	#N/A	24.38+/-1.05	0	1046.51	2	524.263	#N/A	23.91	769626	230625	539001	10821	10821	0	#N/A	0.000887	VACV			FALSE
20221010_MS_zenoSWATH_DC24_VACV_49C_r1.wiff	49C_r1	KSYNYMLL	8	C48H74N10O14S	KSYNYM[+16]LL	KSYNYM(unimod:35)LL	KSYNYM[Oxi]LL	KSYNYM[Oxidation (M)]LL	0.939	0.9959	#N/A	24.38+/-1.05	0	1046.51	2	524.263	#N/A	23.91	112949	42980	69969	400	400	0	#N/A	0.000238	VACV			FALSE
20221010_MS_zenoSWATH_DC24_VACV_49C_r2.wiff	49C_r2	KSYNYMLL	8	C48H74N10O14S	KSYNYM[+16]LL	KSYNYM(unimod:35)LL	KSYNYM[Oxi]LL	KSYNYM[Oxidation (M)]LL	0.9517	0.9921	#N/A	24.38+/-1.05	0	1046.51	2	524.263	#N/A	23.91	492184	151136	341048	6428	6031	396	#N/A	0.000793	VACV			FALSE
20221010_MS_zenoSWATH_DC24_VACV_49C_r3.wiff	49C_r3	KSYNYMLL	8	C48H74N10O14S	KSYNYM[+16]LL	KSYNYM(unimod:35)LL	KSYNYM[Oxi]LL	KSYNYM[Oxidation (M)]LL	0.9548	0.996	#N/A	24.38+/-1.05	0	1046.51	2	524.263	#N/A	23.91	326167	104169	221998	203	203	0	#N/A	0.000739	VACV			FALSE
20221010_MS_zenoSWATH_DC24_VACV_53C_r1.wiff	53C_r1	KSYNYMLL	8	C48H74N10O14S	KSYNYM[+16]LL	KSYNYM(unimod:35)LL	KSYNYM[Oxi]LL	KSYNYM[Oxidation (M)]LL	0.9544	0.9957	#N/A	24.38+/-1.05	0	1046.51	2	524.263	#N/A	23.91	308628	107134	201494	5725	2394	3331	#N/A	0.000581	VACV			FALSE
20221010_MS_zenoSWATH_DC24_VACV_53C_r2.wiff	53C_r2	KSYNYMLL	8	C48H74N10O14S	KSYNYM[+16]LL	KSYNYM(unimod:35)LL	KSYNYM[Oxi]LL	KSYNYM[Oxidation (M)]LL	0.9685	0.9836	#N/A	24.38+/-1.05	0	1046.51	2	524.263	#N/A	23.91	218986	75969	143017	94	94	0	#N/A	0.000525	VACV			FALSE
20221010_MS_zenoSWATH_DC24_VACV_53C_r3.wiff	53C_r3	KSYNYMLL	8	C48H74N10O14S	KSYNYM[+16]LL	KSYNYM(unimod:35)LL	KSYNYM[Oxi]LL	KSYNYM[Oxidation (M)]LL	0.9343	0.9919	#N/A	24.38+/-1.05	0	1046.51	2	524.263	#N/A	23.91	203485	67191	136295	561	561	0	#N/A	0.000696	VACV			FALSE
20221010_MS_zenoSWATH_DC24_VACV_57C_r1.wiff	57C_r1	KSYNYMLL	8	C48H74N10O14S	KSYNYM[+16]LL	KSYNYM(unimod:35)LL	KSYNYM[Oxi]LL	KSYNYM[Oxidation (M)]LL	0.845	0.8953	#N/A	24.38+/-1.05	0.0056	1046.51	2	524.263	#N/A	23.91	10030	5886	4143	1388	1388	0	#N/A	3.9e-05	VACV			FALSE
20221010_MS_zenoSWATH_DC24_VACV_57C_r2.wiff	57C_r2	KSYNYMLL	8	C48H74N10O14S	KSYNYM[+16]LL	KSYNYM(unimod:35)LL	KSYNYM[Oxi]LL	KSYNYM[Oxidation (M)]LL	0.8468	0.9256	#N/A	24.38+/-1.05	0.0008	1046.51	2	524.263	#N/A	23.91	12208	7673	4535	0	0	0	#N/A	6.6e-05	VACV			FALSE
20221010_MS_zenoSWATH_DC24_VACV_57C_r3.wiff	57C_r3	KSYNYMLL	8	C48H74N10O14S	KSYNYM[+16]LL	KSYNYM(unimod:35)LL	KSYNYM[Oxi]LL	KSYNYM[Oxidation (M)]LL	0.8443	0.85	#N/A	24.38+/-1.05	0.0095	1046.51	2	524.263	#N/A	23.91	7659	5521	2138	0	0	0	#N/A	3.2e-05	VACV			FALSE
20221010_MS_zenoSWATH_DC24_VACV_61C_r1.wiff	61C_r1	KSYNYMLL	8	C48H74N10O14S	KSYNYM[+16]LL	KSYNYM(unimod:35)LL	KSYNYM[Oxi]LL	KSYNYM[Oxidation (M)]LL	0.3657	0.327	#N/A	24.38+/-1.05	0.0922	1046.51	2	524.263	#N/A	23.91	27706	25223	2483	0	0	0	#N/A	7e-05	VACV			FALSE
20221010_MS_zenoSWATH_DC24_VACV_61C_r2.wiff	61C_r2	KSYNYMLL	8	C48H74N10O14S	KSYNYM[+16]LL	KSYNYM(unimod:35)LL	KSYNYM[Oxi]LL	KSYNYM[Oxidation (M)]LL	0.5983	0.4599	#N/A	24.38+/-1.05	0.1229	1046.51	2	524.263	#N/A	23.91	2131	515	1617	0	0	0	#N/A	6e-06	VACV			FALSE
20221010_MS_zenoSWATH_DC24_VACV_61C_r3.wiff	61C_r3	KSYNYMLL	8	C48H74N10O14S	KSYNYM[+16]LL	KSYNYM(unimod:35)LL	KSYNYM[Oxi]LL	KSYNYM[Oxidation (M)]LL	0.4393	0.7499	#N/A	24.38+/-1.05	0.1476	1046.51	2	524.263	#N/A	23.91	7980	5907	2073	0	0	0	#N/A	2.7e-05	VACV			FALSE
20221010_MS_zenoSWATH_DC24_VACV_65C_r1.wiff	65C_r1	KSYNYMLL	8	C48H74N10O14S	KSYNYM[+16]LL	KSYNYM(unimod:35)LL	KSYNYM[Oxi]LL	KSYNYM[Oxidation (M)]LL	0.5152	0.3833	#N/A	24.38+/-1.05	0.0992	1046.51	2	524.263	#N/A	23.91	980	111	869	0	0	0	#N/A	3e-06	VACV			FALSE
20221010_MS_zenoSWATH_DC24_VACV_65C_r2.wiff	65C_r2	KSYNYMLL	8	C48H74N10O14S	KSYNYM[+16]LL	KSYNYM(unimod:35)LL	KSYNYM[Oxi]LL	KSYNYM[Oxidation (M)]LL	0.1035	0.5962	#N/A	24.38+/-1.05	0.4021	1046.51	2	524.263	#N/A	23.91	584	467	117	37	37	0	#N/A	4e-06	VACV			FALSE
20221010_MS_zenoSWATH_DC24_VACV_65C_r3.wiff	65C_r3	KSYNYMLL	8	C48H74N10O14S	KSYNYM[+16]LL	KSYNYM(unimod:35)LL	KSYNYM[Oxi]LL	KSYNYM[Oxidation (M)]LL	0.3403	0.9101	#N/A	24.38+/-1.05	0.2679	1046.51	2	524.263	#N/A	23.91	740	322	418	0	0	0	#N/A	2e-06	VACV			FALSE
20221010_MS_zenoSWATH_DC24_VACV_69C_r1.wiff	69C_r1	KSYNYMLL	8	C48H74N10O14S	KSYNYM[+16]LL	KSYNYM(unimod:35)LL	KSYNYM[Oxi]LL	KSYNYM[Oxidation (M)]LL	0.1471	0.5342	#N/A	24.38+/-1.05	0.2732	1046.51	2	524.263	#N/A	23.91	1774	1410	364	4	4	0	#N/A	7e-06	VACV			FALSE
20221010_MS_zenoSWATH_DC24_VACV_69C_r2.wiff	69C_r2	KSYNYMLL	8	C48H74N10O14S	KSYNYM[+16]LL	KSYNYM(unimod:35)LL	KSYNYM[Oxi]LL	KSYNYM[Oxidation (M)]LL	0.2901	0	#N/A	24.38+/-1.05	0.1575	1046.51	2	524.263	#N/A	23.91	883	0	883	0	0	0	#N/A	3e-06	VACV			FALSE
20221010_MS_zenoSWATH_DC24_VACV_69C_r3.wiff	69C_r3	KSYNYMLL	8	C48H74N10O14S	KSYNYM[+16]LL	KSYNYM(unimod:35)LL	KSYNYM[Oxi]LL	KSYNYM[Oxidation (M)]LL	0.1035	0.6474	#N/A	24.38+/-1.05	0.4017	1046.51	2	524.263	#N/A	23.91	594	254	340	3	3	0	#N/A	5e-06	VACV			FALSE
20221010_MS_zenoSWATH_DC24_VACV_73C_r1.wiff	73C_r1	KSYNYMLL	8	C48H74N10O14S	KSYNYM[+16]LL	KSYNYM(unimod:35)LL	KSYNYM[Oxi]LL	KSYNYM[Oxidation (M)]LL	0.1111	0.8799	#N/A	24.38+/-1.05	0.3996	1046.51	2	524.263	#N/A	23.91	1685	1433	252	0	0	0	#N/A	1e-05	VACV			FALSE
20221010_MS_zenoSWATH_DC24_VACV_73C_r2.wiff	73C_r2	KSYNYMLL	8	C48H74N10O14S	KSYNYM[+16]LL	KSYNYM(unimod:35)LL	KSYNYM[Oxi]LL	KSYNYM[Oxidation (M)]LL	0.2295	0.8992	#N/A	24.38+/-1.05	0.2497	1046.51	2	524.263	#N/A	23.91	1966	1119	847	0	0	0	#N/A	1.6e-05	VACV			FALSE
20221010_MS_zenoSWATH_DC24_VACV_73C_r3.wiff	73C_r3	KSYNYMLL	8	C48H74N10O14S	KSYNYM[+16]LL	KSYNYM(unimod:35)LL	KSYNYM[Oxi]LL	KSYNYM[Oxidation (M)]LL	0.4351	0.6909	#N/A	24.38+/-1.05	0.1201	1046.51	2	524.263	#N/A	23.91	1388	298	1090	115	115	0	#N/A	5e-06	VACV			FALSE
20221010_MS_zenoSWATH_DC24_VACV_37C_r1.wiff	37C_r1	YSQVNKRYI	9	C53H83N15O15	YSQVNKRYI	YSQVNKRYI	YSQVNKRYI	YSQVNKRYI	0.6216	0.731	#N/A	24.48+/-2.22	0.1686	1169.62	2	585.817	#N/A	24.28	1130	233	896	0	0	0	#N/A	1e-06	VACV			FALSE
20221010_MS_zenoSWATH_DC24_VACV_37C_r2.wiff	37C_r2	YSQVNKRYI	9	C53H83N15O15	YSQVNKRYI	YSQVNKRYI	YSQVNKRYI	YSQVNKRYI	0.4057	0.5151	#N/A	24.48+/-2.22	0.2695	1169.62	2	585.817	#N/A	24.28	538	18	520	0	0	0	#N/A	1e-06	VACV			FALSE
20221010_MS_zenoSWATH_DC24_VACV_37C_r3.wiff	37C_r3	YSQVNKRYI	9	C53H83N15O15	YSQVNKRYI	YSQVNKRYI	YSQVNKRYI	YSQVNKRYI	0.6587	0.6175	#N/A	24.48+/-2.22	0.2408	1169.62	2	585.817	#N/A	24.28	1644	503	1142	0	0	0	#N/A	2e-06	VACV			FALSE
20221010_MS_zenoSWATH_DC24_VACV_41C_r1.wiff	41C_r1	YSQVNKRYI	9	C53H83N15O15	YSQVNKRYI	YSQVNKRYI	YSQVNKRYI	YSQVNKRYI	0.5051	0.7186	#N/A	24.48+/-2.22	0.231	1169.62	2	585.817	#N/A	24.28	803	189	614	0	0	0	#N/A	1e-06	VACV			FALSE
20221010_MS_zenoSWATH_DC24_VACV_41C_r2.wiff	41C_r2	YSQVNKRYI	9	C53H83N15O15	YSQVNKRYI	YSQVNKRYI	YSQVNKRYI	YSQVNKRYI	0.5122	0.8242	#N/A	24.48+/-2.22	0.3313	1169.62	2	585.817	#N/A	24.28	1096	77	1019	62	0	62	#N/A	2e-06	VACV			FALSE
20221010_MS_zenoSWATH_DC24_VACV_41C_r3.wiff	41C_r3	YSQVNKRYI	9	C53H83N15O15	YSQVNKRYI	YSQVNKRYI	YSQVNKRYI	YSQVNKRYI	0.434	0.6936	#N/A	24.48+/-2.22	0.2903	1169.62	2	585.817	#N/A	24.28	328	43	285	0	0	0	#N/A	0	VACV			FALSE
20221010_MS_zenoSWATH_DC24_VACV_45C_r1.wiff	45C_r1	YSQVNKRYI	9	C53H83N15O15	YSQVNKRYI	YSQVNKRYI	YSQVNKRYI	YSQVNKRYI	0.6013	0.7361	#N/A	24.48+/-2.22	0.0908	1169.62	2	585.817	#N/A	24.28	1238	139	1099	0	0	0	#N/A	1e-06	VACV			FALSE
20221010_MS_zenoSWATH_DC24_VACV_45C_r2.wiff	45C_r2	YSQVNKRYI	9	C53H83N15O15	YSQVNKRYI	YSQVNKRYI	YSQVNKRYI	YSQVNKRYI	0.3939	0.5379	#N/A	24.48+/-2.22	0.2726	1169.62	2	585.817	#N/A	24.28	5781	5319	462	1084	1084	0	#N/A	1e-05	VACV			FALSE
20221010_MS_zenoSWATH_DC24_VACV_45C_r3.wiff	45C_r3	YSQVNKRYI	9	C53H83N15O15	YSQVNKRYI	YSQVNKRYI	YSQVNKRYI	YSQVNKRYI	0.4505	0.3569	#N/A	24.48+/-2.22	0.3263	1169.62	2	585.817	#N/A	24.28	827	121	706	43	43	0	#N/A	1e-06	VACV			FALSE
20221010_MS_zenoSWATH_DC24_VACV_49C_r1.wiff	49C_r1	YSQVNKRYI	9	C53H83N15O15	YSQVNKRYI	YSQVNKRYI	YSQVNKRYI	YSQVNKRYI	0.2813	0.4823	#N/A	24.48+/-2.22	0.2722	1169.62	2	585.817	#N/A	24.28	474	249	224	0	0	0	#N/A	1e-06	VACV			FALSE
20221010_MS_zenoSWATH_DC24_VACV_49C_r2.wiff	49C_r2	YSQVNKRYI	9	C53H83N15O15	YSQVNKRYI	YSQVNKRYI	YSQVNKRYI	YSQVNKRYI	0.4938	0.4395	#N/A	24.48+/-2.22	0.2768	1169.62	2	585.817	#N/A	24.28	549	42	507	19	19	0	#N/A	1e-06	VACV			FALSE
20221010_MS_zenoSWATH_DC24_VACV_49C_r3.wiff	49C_r3	YSQVNKRYI	9	C53H83N15O15	YSQVNKRYI	YSQVNKRYI	YSQVNKRYI	YSQVNKRYI	0.4736	0.5542	#N/A	24.48+/-2.22	0.2668	1169.62	2	585.817	#N/A	24.28	667	217	450	6	6	0	#N/A	2e-06	VACV			FALSE
20221010_MS_zenoSWATH_DC24_VACV_53C_r1.wiff	53C_r1	YSQVNKRYI	9	C53H83N15O15	YSQVNKRYI	YSQVNKRYI	YSQVNKRYI	YSQVNKRYI	0.505	0	#N/A	24.48+/-2.22	0.1527	1169.62	2	585.817	#N/A	24.28	1324	0	1324	0	0	0	#N/A	2e-06	VACV			FALSE
20221010_MS_zenoSWATH_DC24_VACV_53C_r2.wiff	53C_r2	YSQVNKRYI	9	C53H83N15O15	YSQVNKRYI	YSQVNKRYI	YSQVNKRYI	YSQVNKRYI	0.6308	0.6097	#N/A	24.48+/-2.22	0.318	1169.62	2	585.817	#N/A	24.28	1111	206	906	0	0	0	#N/A	3e-06	VACV			FALSE
20221010_MS_zenoSWATH_DC24_VACV_53C_r3.wiff	53C_r3	YSQVNKRYI	9	C53H83N15O15	YSQVNKRYI	YSQVNKRYI	YSQVNKRYI	YSQVNKRYI	0.4059	0.8241	#N/A	24.48+/-2.22	0.414	1169.62	2	585.817	#N/A	24.28	1010	162	848	38	38	0	#N/A	3e-06	VACV			FALSE
20221010_MS_zenoSWATH_DC24_VACV_57C_r1.wiff	57C_r1	YSQVNKRYI	9	C53H83N15O15	YSQVNKRYI	YSQVNKRYI	YSQVNKRYI	YSQVNKRYI	0.4837	0.6751	#N/A	24.48+/-2.22	0.2433	1169.62	2	585.817	#N/A	24.28	4172	3218	954	0	0	0	#N/A	1.6e-05	VACV			FALSE
20221010_MS_zenoSWATH_DC24_VACV_57C_r2.wiff	57C_r2	YSQVNKRYI	9	C53H83N15O15	YSQVNKRYI	YSQVNKRYI	YSQVNKRYI	YSQVNKRYI	0.433	0.4447	#N/A	24.48+/-2.22	0.2727	1169.62	2	585.817	#N/A	24.28	1576	1245	332	35	35	0	#N/A	9e-06	VACV			FALSE
20221010_MS_zenoSWATH_DC24_VACV_57C_r3.wiff	57C_r3	YSQVNKRYI	9	C53H83N15O15	YSQVNKRYI	YSQVNKRYI	YSQVNKRYI	YSQVNKRYI	0.5656	0.3997	#N/A	24.48+/-2.22	0.3185	1169.62	2	585.817	#N/A	24.28	516	28	488	117	117	0	#N/A	2e-06	VACV			FALSE
20221010_MS_zenoSWATH_DC24_VACV_61C_r1.wiff	61C_r1	YSQVNKRYI	9	C53H83N15O15	YSQVNKRYI	YSQVNKRYI	YSQVNKRYI	YSQVNKRYI	0.4761	0.5557	#N/A	24.48+/-2.22	0.2821	1169.62	2	585.817	#N/A	24.28	5290	2211	3079	0	0	0	#N/A	1.3e-05	VACV			FALSE
20221010_MS_zenoSWATH_DC24_VACV_61C_r2.wiff	61C_r2	YSQVNKRYI	9	C53H83N15O15	YSQVNKRYI	YSQVNKRYI	YSQVNKRYI	YSQVNKRYI	0.493	0	#N/A	24.48+/-2.22	0.19	1169.62	2	585.817	#N/A	24.28	1342	0	1342	0	0	0	#N/A	4e-06	VACV			FALSE
20221010_MS_zenoSWATH_DC24_VACV_61C_r3.wiff	61C_r3	YSQVNKRYI	9	C53H83N15O15	YSQVNKRYI	YSQVNKRYI	YSQVNKRYI	YSQVNKRYI	0.5516	0.758	#N/A	24.48+/-2.22	0.2352	1169.62	2	585.817	#N/A	24.28	4274	2955	1319	0	0	0	#N/A	1.4e-05	VACV			FALSE
20221010_MS_zenoSWATH_DC24_VACV_65C_r1.wiff	65C_r1	YSQVNKRYI	9	C53H83N15O15	YSQVNKRYI	YSQVNKRYI	YSQVNKRYI	YSQVNKRYI	0.4183	0.7442	#N/A	24.48+/-2.22	0.3312	1169.62	2	585.817	#N/A	24.28	5249	1189	4060	0	0	0	#N/A	1.7e-05	VACV			FALSE
20221010_MS_zenoSWATH_DC24_VACV_65C_r2.wiff	65C_r2	YSQVNKRYI	9	C53H83N15O15	YSQVNKRYI	YSQVNKRYI	YSQVNKRYI	YSQVNKRYI	0.4269	0.5446	#N/A	24.48+/-2.22	0.2682	1169.62	2	585.817	#N/A	24.28	1021	674	347	389	389	0	#N/A	7e-06	VACV			FALSE
20221010_MS_zenoSWATH_DC24_VACV_65C_r3.wiff	65C_r3	YSQVNKRYI	9	C53H83N15O15	YSQVNKRYI	YSQVNKRYI	YSQVNKRYI	YSQVNKRYI	0.5739	0.5635	#N/A	24.48+/-2.22	0.3044	1169.62	2	585.817	#N/A	24.28	2884	2131	753	797	797	0	#N/A	9e-06	VACV			FALSE
20221010_MS_zenoSWATH_DC24_VACV_69C_r1.wiff	69C_r1	YSQVNKRYI	9	C53H83N15O15	YSQVNKRYI	YSQVNKRYI	YSQVNKRYI	YSQVNKRYI	0.4609	0.4787	#N/A	24.48+/-2.22	0.2956	1169.62	2	585.817	#N/A	24.28	320	85	235	0	0	0	#N/A	1e-06	VACV			FALSE
20221010_MS_zenoSWATH_DC24_VACV_69C_r2.wiff	69C_r2	YSQVNKRYI	9	C53H83N15O15	YSQVNKRYI	YSQVNKRYI	YSQVNKRYI	YSQVNKRYI	0.3658	0.5615	#N/A	24.48+/-2.22	0.3787	1169.62	2	585.817	#N/A	24.28	1259	429	830	0	0	0	#N/A	5e-06	VACV			FALSE
20221010_MS_zenoSWATH_DC24_VACV_69C_r3.wiff	69C_r3	YSQVNKRYI	9	C53H83N15O15	YSQVNKRYI	YSQVNKRYI	YSQVNKRYI	YSQVNKRYI	0.3672	0	#N/A	24.48+/-2.22	0.2839	1169.62	2	585.817	#N/A	24.28	251	0	251	0	0	0	#N/A	2e-06	VACV			FALSE
20221010_MS_zenoSWATH_DC24_VACV_73C_r1.wiff	73C_r1	YSQVNKRYI	9	C53H83N15O15	YSQVNKRYI	YSQVNKRYI	YSQVNKRYI	YSQVNKRYI	0.3283	0.4854	#N/A	24.48+/-2.22	0.424	1169.62	2	585.817	#N/A	24.28	230	94	136	11	11	0	#N/A	1e-06	VACV			FALSE
20221010_MS_zenoSWATH_DC24_VACV_73C_r2.wiff	73C_r2	YSQVNKRYI	9	C53H83N15O15	YSQVNKRYI	YSQVNKRYI	YSQVNKRYI	YSQVNKRYI	0.4516	0.7283	#N/A	24.48+/-2.22	0.316	1169.62	2	585.817	#N/A	24.28	1287	688	599	23	23	0	#N/A	1e-05	VACV			FALSE
20221010_MS_zenoSWATH_DC24_VACV_73C_r3.wiff	73C_r3	YSQVNKRYI	9	C53H83N15O15	YSQVNKRYI	YSQVNKRYI	YSQVNKRYI	YSQVNKRYI	0.4475	0.8138	#N/A	24.48+/-2.22	0.2695	1169.62	2	585.817	#N/A	24.28	810	441	368	0	0	0	#N/A	3e-06	VACV			FALSE
20221010_MS_zenoSWATH_DC24_VACV_37C_r1.wiff	37C_r1	YSQVNKRYI	9	C53H82N14O16	YSQ[+1]VNKRYI	YSQ(unimod:7)VNKRYI	YSQ[Dea]VNKRYI	YSQ[Deamidated (NQ)]VNKRYI	0.6196	0.5951	#N/A	21.89+/-1.28	0.1885	1170.6	2	586.309	#N/A	21.53	1149	114	1035	65	0	65	#N/A	1e-06	VACV			FALSE
20221010_MS_zenoSWATH_DC24_VACV_37C_r2.wiff	37C_r2	YSQVNKRYI	9	C53H82N14O16	YSQ[+1]VNKRYI	YSQ(unimod:7)VNKRYI	YSQ[Dea]VNKRYI	YSQ[Deamidated (NQ)]VNKRYI	0.549	0.6011	#N/A	21.89+/-1.28	0.2134	1170.6	2	586.309	#N/A	21.53	724	94	630	1	1	0	#N/A	1e-06	VACV			FALSE
20221010_MS_zenoSWATH_DC24_VACV_37C_r3.wiff	37C_r3	YSQVNKRYI	9	C53H82N14O16	YSQ[+1]VNKRYI	YSQ(unimod:7)VNKRYI	YSQ[Dea]VNKRYI	YSQ[Deamidated (NQ)]VNKRYI	0.3659	0.6555	#N/A	21.89+/-1.28	0.1422	1170.6	2	586.309	#N/A	21.53	1957	155	1802	0	0	0	#N/A	3e-06	VACV			FALSE
20221010_MS_zenoSWATH_DC24_VACV_41C_r1.wiff	41C_r1	YSQVNKRYI	9	C53H82N14O16	YSQ[+1]VNKRYI	YSQ(unimod:7)VNKRYI	YSQ[Dea]VNKRYI	YSQ[Deamidated (NQ)]VNKRYI	0.394	0.4757	#N/A	21.89+/-1.28	0.2719	1170.6	2	586.309	#N/A	21.53	1232	225	1007	37	37	0	#N/A	2e-06	VACV			FALSE
20221010_MS_zenoSWATH_DC24_VACV_41C_r2.wiff	41C_r2	YSQVNKRYI	9	C53H82N14O16	YSQ[+1]VNKRYI	YSQ(unimod:7)VNKRYI	YSQ[Dea]VNKRYI	YSQ[Deamidated (NQ)]VNKRYI	0.2653	0.5183	#N/A	21.89+/-1.28	0.2712	1170.6	2	586.309	#N/A	21.53	1573	20	1553	0	0	0	#N/A	2e-06	VACV			FALSE
20221010_MS_zenoSWATH_DC24_VACV_41C_r3.wiff	41C_r3	YSQVNKRYI	9	C53H82N14O16	YSQ[+1]VNKRYI	YSQ(unimod:7)VNKRYI	YSQ[Dea]VNKRYI	YSQ[Deamidated (NQ)]VNKRYI	0.3945	0.7381	#N/A	21.89+/-1.28	0.2762	1170.6	2	586.309	#N/A	21.53	1849	1132	717	1	1	0	#N/A	3e-06	VACV			FALSE
20221010_MS_zenoSWATH_DC24_VACV_45C_r1.wiff	45C_r1	YSQVNKRYI	9	C53H82N14O16	YSQ[+1]VNKRYI	YSQ(unimod:7)VNKRYI	YSQ[Dea]VNKRYI	YSQ[Deamidated (NQ)]VNKRYI	0.3972	0.4609	#N/A	21.89+/-1.28	0.2636	1170.6	2	586.309	#N/A	21.53	1007	66	941	0	0	0	#N/A	1e-06	VACV			FALSE
20221010_MS_zenoSWATH_DC24_VACV_45C_r2.wiff	45C_r2	YSQVNKRYI	9	C53H82N14O16	YSQ[+1]VNKRYI	YSQ(unimod:7)VNKRYI	YSQ[Dea]VNKRYI	YSQ[Deamidated (NQ)]VNKRYI	0.4096	0.9794	#N/A	21.89+/-1.28	0.3384	1170.6	2	586.309	#N/A	21.53	15309	14887	422	2429	2429	0	#N/A	2.7e-05	VACV			FALSE
20221010_MS_zenoSWATH_DC24_VACV_45C_r3.wiff	45C_r3	YSQVNKRYI	9	C53H82N14O16	YSQ[+1]VNKRYI	YSQ(unimod:7)VNKRYI	YSQ[Dea]VNKRYI	YSQ[Deamidated (NQ)]VNKRYI	0.4086	0.7704	#N/A	21.89+/-1.28	0.2599	1170.6	2	586.309	#N/A	21.53	1333	193	1140	0	0	0	#N/A	2e-06	VACV			FALSE
20221010_MS_zenoSWATH_DC24_VACV_49C_r1.wiff	49C_r1	YSQVNKRYI	9	C53H82N14O16	YSQ[+1]VNKRYI	YSQ(unimod:7)VNKRYI	YSQ[Dea]VNKRYI	YSQ[Deamidated (NQ)]VNKRYI	0.3688	0.2323	#N/A	21.89+/-1.28	0.3095	1170.6	2	586.309	#N/A	21.53	331	31	299	0	0	0	#N/A	1e-06	VACV			FALSE
20221010_MS_zenoSWATH_DC24_VACV_49C_r2.wiff	49C_r2	YSQVNKRYI	9	C53H82N14O16	YSQ[+1]VNKRYI	YSQ(unimod:7)VNKRYI	YSQ[Dea]VNKRYI	YSQ[Deamidated (NQ)]VNKRYI	0.2707	0.3424	#N/A	21.89+/-1.28	0.3847	1170.6	2	586.309	#N/A	21.53	740	114	627	0	0	0	#N/A	1e-06	VACV			FALSE
20221010_MS_zenoSWATH_DC24_VACV_49C_r3.wiff	49C_r3	YSQVNKRYI	9	C53H82N14O16	YSQ[+1]VNKRYI	YSQ(unimod:7)VNKRYI	YSQ[Dea]VNKRYI	YSQ[Deamidated (NQ)]VNKRYI	0.2931	0.5183	#N/A	21.89+/-1.28	0.2648	1170.6	2	586.309	#N/A	21.53	1864	77	1787	0	0	0	#N/A	4e-06	VACV			FALSE
20221010_MS_zenoSWATH_DC24_VACV_53C_r1.wiff	53C_r1	YSQVNKRYI	9	C53H82N14O16	YSQ[+1]VNKRYI	YSQ(unimod:7)VNKRYI	YSQ[Dea]VNKRYI	YSQ[Deamidated (NQ)]VNKRYI	0.5317	0.7765	#N/A	21.89+/-1.28	0.2584	1170.6	2	586.309	#N/A	21.53	1760	97	1663	160	0	160	#N/A	3e-06	VACV			FALSE
20221010_MS_zenoSWATH_DC24_VACV_53C_r2.wiff	53C_r2	YSQVNKRYI	9	C53H82N14O16	YSQ[+1]VNKRYI	YSQ(unimod:7)VNKRYI	YSQ[Dea]VNKRYI	YSQ[Deamidated (NQ)]VNKRYI	0.5581	0.4002	#N/A	21.89+/-1.28	0.2634	1170.6	2	586.309	#N/A	21.53	898	96	802	49	49	0	#N/A	2e-06	VACV			FALSE
20221010_MS_zenoSWATH_DC24_VACV_53C_r3.wiff	53C_r3	YSQVNKRYI	9	C53H82N14O16	YSQ[+1]VNKRYI	YSQ(unimod:7)VNKRYI	YSQ[Dea]VNKRYI	YSQ[Deamidated (NQ)]VNKRYI	0.4224	0.4805	#N/A	21.89+/-1.28	0.2695	1170.6	2	586.309	#N/A	21.53	777	34	743	0	0	0	#N/A	3e-06	VACV			FALSE
20221010_MS_zenoSWATH_DC24_VACV_57C_r1.wiff	57C_r1	YSQVNKRYI	9	C53H82N14O16	YSQ[+1]VNKRYI	YSQ(unimod:7)VNKRYI	YSQ[Dea]VNKRYI	YSQ[Deamidated (NQ)]VNKRYI	0.4491	0.5464	#N/A	21.89+/-1.28	0.2561	1170.6	2	586.309	#N/A	21.53	632	81	551	0	0	0	#N/A	2e-06	VACV			FALSE
20221010_MS_zenoSWATH_DC24_VACV_57C_r2.wiff	57C_r2	YSQVNKRYI	9	C53H82N14O16	YSQ[+1]VNKRYI	YSQ(unimod:7)VNKRYI	YSQ[Dea]VNKRYI	YSQ[Deamidated (NQ)]VNKRYI	0.4158	0.7633	#N/A	21.89+/-1.28	0.3007	1170.6	2	586.309	#N/A	21.53	639	127	512	0	0	0	#N/A	3e-06	VACV			FALSE
20221010_MS_zenoSWATH_DC24_VACV_57C_r3.wiff	57C_r3	YSQVNKRYI	9	C53H82N14O16	YSQ[+1]VNKRYI	YSQ(unimod:7)VNKRYI	YSQ[Dea]VNKRYI	YSQ[Deamidated (NQ)]VNKRYI	0.4229	0.6243	#N/A	21.89+/-1.28	0.3845	1170.6	2	586.309	#N/A	21.53	1513	515	998	458	398	60	#N/A	6e-06	VACV			FALSE
20221010_MS_zenoSWATH_DC24_VACV_61C_r1.wiff	61C_r1	YSQVNKRYI	9	C53H82N14O16	YSQ[+1]VNKRYI	YSQ(unimod:7)VNKRYI	YSQ[Dea]VNKRYI	YSQ[Deamidated (NQ)]VNKRYI	0.4659	0.6541	#N/A	21.89+/-1.28	0.2474	1170.6	2	586.309	#N/A	21.53	1496	679	817	24	24	0	#N/A	4e-06	VACV			FALSE
20221010_MS_zenoSWATH_DC24_VACV_61C_r2.wiff	61C_r2	YSQVNKRYI	9	C53H82N14O16	YSQ[+1]VNKRYI	YSQ(unimod:7)VNKRYI	YSQ[Dea]VNKRYI	YSQ[Deamidated (NQ)]VNKRYI	0.5138	0.3616	#N/A	21.89+/-1.28	0.2609	1170.6	2	586.309	#N/A	21.53	1347	223	1124	0	0	0	#N/A	4e-06	VACV			FALSE
20221010_MS_zenoSWATH_DC24_VACV_61C_r3.wiff	61C_r3	YSQVNKRYI	9	C53H82N14O16	YSQ[+1]VNKRYI	YSQ(unimod:7)VNKRYI	YSQ[Dea]VNKRYI	YSQ[Deamidated (NQ)]VNKRYI	0.4285	0.6703	#N/A	21.89+/-1.28	0.2163	1170.6	2	586.309	#N/A	21.53	1720	483	1237	32	32	0	#N/A	6e-06	VACV			FALSE
20221010_MS_zenoSWATH_DC24_VACV_65C_r1.wiff	65C_r1	YSQVNKRYI	9	C53H82N14O16	YSQ[+1]VNKRYI	YSQ(unimod:7)VNKRYI	YSQ[Dea]VNKRYI	YSQ[Deamidated (NQ)]VNKRYI	0.3249	0.638	#N/A	21.89+/-1.28	0.3816	1170.6	2	586.309	#N/A	21.53	871	354	517	39	39	0	#N/A	3e-06	VACV			FALSE
20221010_MS_zenoSWATH_DC24_VACV_65C_r2.wiff	65C_r2	YSQVNKRYI	9	C53H82N14O16	YSQ[+1]VNKRYI	YSQ(unimod:7)VNKRYI	YSQ[Dea]VNKRYI	YSQ[Deamidated (NQ)]VNKRYI	0.3341	0.8496	#N/A	21.89+/-1.28	0.281	1170.6	2	586.309	#N/A	21.53	432	39	393	8	8	0	#N/A	3e-06	VACV			FALSE
20221010_MS_zenoSWATH_DC24_VACV_65C_r3.wiff	65C_r3	YSQVNKRYI	9	C53H82N14O16	YSQ[+1]VNKRYI	YSQ(unimod:7)VNKRYI	YSQ[Dea]VNKRYI	YSQ[Deamidated (NQ)]VNKRYI	0.3803	0.6909	#N/A	21.89+/-1.28	0.3324	1170.6	2	586.309	#N/A	21.53	819	293	526	0	0	0	#N/A	3e-06	VACV			FALSE
20221010_MS_zenoSWATH_DC24_VACV_69C_r1.wiff	69C_r1	YSQVNKRYI	9	C53H82N14O16	YSQ[+1]VNKRYI	YSQ(unimod:7)VNKRYI	YSQ[Dea]VNKRYI	YSQ[Deamidated (NQ)]VNKRYI	0.3767	0.3989	#N/A	21.89+/-1.28	0.3205	1170.6	2	586.309	#N/A	21.53	318	30	288	0	0	0	#N/A	1e-06	VACV			FALSE
20221010_MS_zenoSWATH_DC24_VACV_69C_r2.wiff	69C_r2	YSQVNKRYI	9	C53H82N14O16	YSQ[+1]VNKRYI	YSQ(unimod:7)VNKRYI	YSQ[Dea]VNKRYI	YSQ[Deamidated (NQ)]VNKRYI	0.4838	0.2323	#N/A	21.89+/-1.28	0.2504	1170.6	2	586.309	#N/A	21.53	353	1	352	0	0	0	#N/A	1e-06	VACV			FALSE
20221010_MS_zenoSWATH_DC24_VACV_69C_r3.wiff	69C_r3	YSQVNKRYI	9	C53H82N14O16	YSQ[+1]VNKRYI	YSQ(unimod:7)VNKRYI	YSQ[Dea]VNKRYI	YSQ[Deamidated (NQ)]VNKRYI	0.2588	0.3989	#N/A	21.89+/-1.28	0.3995	1170.6	2	586.309	#N/A	21.53	282	64	218	0	0	0	#N/A	2e-06	VACV			FALSE
20221010_MS_zenoSWATH_DC24_VACV_73C_r1.wiff	73C_r1	YSQVNKRYI	9	C53H82N14O16	YSQ[+1]VNKRYI	YSQ(unimod:7)VNKRYI	YSQ[Dea]VNKRYI	YSQ[Deamidated (NQ)]VNKRYI	0.3604	0.5183	#N/A	21.89+/-1.28	0.3995	1170.6	2	586.309	#N/A	21.53	297	51	246	0	0	0	#N/A	2e-06	VACV			FALSE
20221010_MS_zenoSWATH_DC24_VACV_73C_r2.wiff	73C_r2	YSQVNKRYI	9	C53H82N14O16	YSQ[+1]VNKRYI	YSQ(unimod:7)VNKRYI	YSQ[Dea]VNKRYI	YSQ[Deamidated (NQ)]VNKRYI	0.3578	0.747	#N/A	21.89+/-1.28	0.4155	1170.6	2	586.309	#N/A	21.53	294	43	251	0	0	0	#N/A	2e-06	VACV			FALSE
20221010_MS_zenoSWATH_DC24_VACV_73C_r3.wiff	73C_r3	YSQVNKRYI	9	C53H82N14O16	YSQ[+1]VNKRYI	YSQ(unimod:7)VNKRYI	YSQ[Dea]VNKRYI	YSQ[Deamidated (NQ)]VNKRYI	0.3283	0.5995	#N/A	21.89+/-1.28	0.3192	1170.6	2	586.309	#N/A	21.53	1108	342	765	0	0	0	#N/A	4e-06	VACV			FALSE
20221010_MS_zenoSWATH_DC24_VACV_37C_r1.wiff	37C_r1	YSQVNKRYI	9	C53H82N14O16	YSQVN[+1]KRYI	YSQVN(unimod:7)KRYI	YSQVN[Dea]KRYI	YSQVN[Deamidated (NQ)]KRYI	0.5528	0.7322	#N/A	22.79+/-1.69	0.1215	1170.6	2	586.309	#N/A	21.99	1505	252	1253	11	11	0	#N/A	2e-06	VACV			FALSE
20221010_MS_zenoSWATH_DC24_VACV_37C_r2.wiff	37C_r2	YSQVNKRYI	9	C53H82N14O16	YSQVN[+1]KRYI	YSQVN(unimod:7)KRYI	YSQVN[Dea]KRYI	YSQVN[Deamidated (NQ)]KRYI	0.4587	0.2323	#N/A	22.79+/-1.69	0.0885	1170.6	2	586.309	#N/A	21.99	1105	75	1030	7	7	0	#N/A	2e-06	VACV			FALSE
20221010_MS_zenoSWATH_DC24_VACV_37C_r3.wiff	37C_r3	YSQVNKRYI	9	C53H82N14O16	YSQVN[+1]KRYI	YSQVN(unimod:7)KRYI	YSQVN[Dea]KRYI	YSQVN[Deamidated (NQ)]KRYI	0.3802	0.8607	#N/A	22.79+/-1.69	0.3096	1170.6	2	586.309	#N/A	21.99	3074	306	2768	0	0	0	#N/A	4e-06	VACV			FALSE
20221010_MS_zenoSWATH_DC24_VACV_41C_r1.wiff	41C_r1	YSQVNKRYI	9	C53H82N14O16	YSQVN[+1]KRYI	YSQVN(unimod:7)KRYI	YSQVN[Dea]KRYI	YSQVN[Deamidated (NQ)]KRYI	0.5186	0.8896	#N/A	22.79+/-1.69	0.3058	1170.6	2	586.309	#N/A	21.99	1629	564	1065	0	0	0	#N/A	2e-06	VACV			FALSE
20221010_MS_zenoSWATH_DC24_VACV_41C_r2.wiff	41C_r2	YSQVNKRYI	9	C53H82N14O16	YSQVN[+1]KRYI	YSQVN(unimod:7)KRYI	YSQVN[Dea]KRYI	YSQVN[Deamidated (NQ)]KRYI	0.4054	0.5811	#N/A	22.79+/-1.69	0.2622	1170.6	2	586.309	#N/A	21.99	866	170	696	0	0	0	#N/A	1e-06	VACV			FALSE
20221010_MS_zenoSWATH_DC24_VACV_41C_r3.wiff	41C_r3	YSQVNKRYI	9	C53H82N14O16	YSQVN[+1]KRYI	YSQVN(unimod:7)KRYI	YSQVN[Dea]KRYI	YSQVN[Deamidated (NQ)]KRYI	0.3064	0.7034	#N/A	22.79+/-1.69	0.2728	1170.6	2	586.309	#N/A	21.99	1735	814	920	0	0	0	#N/A	2e-06	VACV			FALSE
20221010_MS_zenoSWATH_DC24_VACV_45C_r1.wiff	45C_r1	YSQVNKRYI	9	C53H82N14O16	YSQVN[+1]KRYI	YSQVN(unimod:7)KRYI	YSQVN[Dea]KRYI	YSQVN[Deamidated (NQ)]KRYI	0.4876	0.6719	#N/A	22.79+/-1.69	0.238	1170.6	2	586.309	#N/A	21.99	1366	252	1113	0	0	0	#N/A	1e-06	VACV			FALSE
20221010_MS_zenoSWATH_DC24_VACV_45C_r2.wiff	45C_r2	YSQVNKRYI	9	C53H82N14O16	YSQVN[+1]KRYI	YSQVN(unimod:7)KRYI	YSQVN[Dea]KRYI	YSQVN[Deamidated (NQ)]KRYI	0.3152	0.7301	#N/A	22.79+/-1.69	0.2707	1170.6	2	586.309	#N/A	21.99	886	124	762	0	0	0	#N/A	2e-06	VACV			FALSE
20221010_MS_zenoSWATH_DC24_VACV_45C_r3.wiff	45C_r3	YSQVNKRYI	9	C53H82N14O16	YSQVN[+1]KRYI	YSQVN(unimod:7)KRYI	YSQVN[Dea]KRYI	YSQVN[Deamidated (NQ)]KRYI	0.3711	0	#N/A	22.79+/-1.69	0.2059	1170.6	2	586.309	#N/A	21.99	898	0	898	0	0	0	#N/A	1e-06	VACV			FALSE
20221010_MS_zenoSWATH_DC24_VACV_49C_r1.wiff	49C_r1	YSQVNKRYI	9	C53H82N14O16	YSQVN[+1]KRYI	YSQVN(unimod:7)KRYI	YSQVN[Dea]KRYI	YSQVN[Deamidated (NQ)]KRYI	0.3096	0.5846	#N/A	22.79+/-1.69	0.3854	1170.6	2	586.309	#N/A	21.99	538	155	383	0	0	0	#N/A	1e-06	VACV			FALSE
20221010_MS_zenoSWATH_DC24_VACV_49C_r2.wiff	49C_r2	YSQVNKRYI	9	C53H82N14O16	YSQVN[+1]KRYI	YSQVN(unimod:7)KRYI	YSQVN[Dea]KRYI	YSQVN[Deamidated (NQ)]KRYI	0.2888	0.7683	#N/A	22.79+/-1.69	0.2744	1170.6	2	586.309	#N/A	21.99	1082	787	295	0	0	0	#N/A	2e-06	VACV			FALSE
20221010_MS_zenoSWATH_DC24_VACV_49C_r3.wiff	49C_r3	YSQVNKRYI	9	C53H82N14O16	YSQVN[+1]KRYI	YSQVN(unimod:7)KRYI	YSQVN[Dea]KRYI	YSQVN[Deamidated (NQ)]KRYI	0.299	0.4774	#N/A	22.79+/-1.69	0.2499	1170.6	2	586.309	#N/A	21.99	924	192	732	0	0	0	#N/A	2e-06	VACV			FALSE
20221010_MS_zenoSWATH_DC24_VACV_53C_r1.wiff	53C_r1	YSQVNKRYI	9	C53H82N14O16	YSQVN[+1]KRYI	YSQVN(unimod:7)KRYI	YSQVN[Dea]KRYI	YSQVN[Deamidated (NQ)]KRYI	0.4479	0.592	#N/A	22.79+/-1.69	0.2599	1170.6	2	586.309	#N/A	21.99	1200	83	1117	12	12	0	#N/A	2e-06	VACV			FALSE
20221010_MS_zenoSWATH_DC24_VACV_53C_r2.wiff	53C_r2	YSQVNKRYI	9	C53H82N14O16	YSQVN[+1]KRYI	YSQVN(unimod:7)KRYI	YSQVN[Dea]KRYI	YSQVN[Deamidated (NQ)]KRYI	0.3716	0.2323	#N/A	22.79+/-1.69	0.2304	1170.6	2	586.309	#N/A	21.99	1208	24	1184	0	0	0	#N/A	3e-06	VACV			FALSE
20221010_MS_zenoSWATH_DC24_VACV_53C_r3.wiff	53C_r3	YSQVNKRYI	9	C53H82N14O16	YSQVN[+1]KRYI	YSQVN(unimod:7)KRYI	YSQVN[Dea]KRYI	YSQVN[Deamidated (NQ)]KRYI	0.4813	0.6548	#N/A	22.79+/-1.69	0.2154	1170.6	2	586.309	#N/A	21.99	2617	815	1801	0	0	0	#N/A	9e-06	VACV			FALSE
20221010_MS_zenoSWATH_DC24_VACV_57C_r1.wiff	57C_r1	YSQVNKRYI	9	C53H82N14O16	YSQVN[+1]KRYI	YSQVN(unimod:7)KRYI	YSQVN[Dea]KRYI	YSQVN[Deamidated (NQ)]KRYI	0.5035	0.6695	#N/A	22.79+/-1.69	0.2616	1170.6	2	586.309	#N/A	21.99	798	104	694	80	80	0	#N/A	3e-06	VACV			FALSE
20221010_MS_zenoSWATH_DC24_VACV_57C_r2.wiff	57C_r2	YSQVNKRYI	9	C53H82N14O16	YSQVN[+1]KRYI	YSQVN(unimod:7)KRYI	YSQVN[Dea]KRYI	YSQVN[Deamidated (NQ)]KRYI	0.4182	0.7402	#N/A	22.79+/-1.69	0.1652	1170.6	2	586.309	#N/A	21.99	1035	473	561	83	83	0	#N/A	6e-06	VACV			FALSE
20221010_MS_zenoSWATH_DC24_VACV_57C_r3.wiff	57C_r3	YSQVNKRYI	9	C53H82N14O16	YSQVN[+1]KRYI	YSQVN(unimod:7)KRYI	YSQVN[Dea]KRYI	YSQVN[Deamidated (NQ)]KRYI	0.3012	0.5596	#N/A	22.79+/-1.69	0.2655	1170.6	2	586.309	#N/A	21.99	2059	777	1282	321	321	0	#N/A	8e-06	VACV			FALSE
20221010_MS_zenoSWATH_DC24_VACV_61C_r1.wiff	61C_r1	YSQVNKRYI	9	C53H82N14O16	YSQVN[+1]KRYI	YSQVN(unimod:7)KRYI	YSQVN[Dea]KRYI	YSQVN[Deamidated (NQ)]KRYI	0.4437	0.8872	#N/A	22.79+/-1.69	0.1633	1170.6	2	586.309	#N/A	21.99	3231	1411	1820	141	141	0	#N/A	8e-06	VACV			FALSE
20221010_MS_zenoSWATH_DC24_VACV_61C_r2.wiff	61C_r2	YSQVNKRYI	9	C53H82N14O16	YSQVN[+1]KRYI	YSQVN(unimod:7)KRYI	YSQVN[Dea]KRYI	YSQVN[Deamidated (NQ)]KRYI	0.4739	0.3989	#N/A	22.79+/-1.69	0.2604	1170.6	2	586.309	#N/A	21.99	1010	128	882	0	0	0	#N/A	3e-06	VACV			FALSE
20221010_MS_zenoSWATH_DC24_VACV_61C_r3.wiff	61C_r3	YSQVNKRYI	9	C53H82N14O16	YSQVN[+1]KRYI	YSQVN(unimod:7)KRYI	YSQVN[Dea]KRYI	YSQVN[Deamidated (NQ)]KRYI	0.567	0.6862	#N/A	22.79+/-1.69	0.2118	1170.6	2	586.309	#N/A	21.99	643	115	528	65	65	0	#N/A	2e-06	VACV			FALSE
20221010_MS_zenoSWATH_DC24_VACV_65C_r1.wiff	65C_r1	YSQVNKRYI	9	C53H82N14O16	YSQVN[+1]KRYI	YSQVN(unimod:7)KRYI	YSQVN[Dea]KRYI	YSQVN[Deamidated (NQ)]KRYI	0.3011	0.7053	#N/A	22.79+/-1.69	0.2736	1170.6	2	586.309	#N/A	21.99	1005	472	534	109	109	0	#N/A	3e-06	VACV			FALSE
20221010_MS_zenoSWATH_DC24_VACV_65C_r2.wiff	65C_r2	YSQVNKRYI	9	C53H82N14O16	YSQVN[+1]KRYI	YSQVN(unimod:7)KRYI	YSQVN[Dea]KRYI	YSQVN[Deamidated (NQ)]KRYI	0.2784	0.7819	#N/A	22.79+/-1.69	0.3516	1170.6	2	586.309	#N/A	21.99	727	361	365	152	152	0	#N/A	5e-06	VACV			FALSE
20221010_MS_zenoSWATH_DC24_VACV_65C_r3.wiff	65C_r3	YSQVNKRYI	9	C53H82N14O16	YSQVN[+1]KRYI	YSQVN(unimod:7)KRYI	YSQVN[Dea]KRYI	YSQVN[Deamidated (NQ)]KRYI	0.5718	0.7166	#N/A	22.79+/-1.69	0.2649	1170.6	2	586.309	#N/A	21.99	945	129	816	0	0	0	#N/A	3e-06	VACV			FALSE
20221010_MS_zenoSWATH_DC24_VACV_69C_r1.wiff	69C_r1	YSQVNKRYI	9	C53H82N14O16	YSQVN[+1]KRYI	YSQVN(unimod:7)KRYI	YSQVN[Dea]KRYI	YSQVN[Deamidated (NQ)]KRYI	0.3098	0.923	#N/A	22.79+/-1.69	0.2745	1170.6	2	586.309	#N/A	21.99	419	28	391	0	0	0	#N/A	2e-06	VACV			FALSE
20221010_MS_zenoSWATH_DC24_VACV_69C_r2.wiff	69C_r2	YSQVNKRYI	9	C53H82N14O16	YSQVN[+1]KRYI	YSQVN(unimod:7)KRYI	YSQVN[Dea]KRYI	YSQVN[Deamidated (NQ)]KRYI	0.4737	0.9115	#N/A	22.79+/-1.69	0.1053	1170.6	2	586.309	#N/A	21.99	1371	668	703	0	0	0	#N/A	5e-06	VACV			FALSE
20221010_MS_zenoSWATH_DC24_VACV_69C_r3.wiff	69C_r3	YSQVNKRYI	9	C53H82N14O16	YSQVN[+1]KRYI	YSQVN(unimod:7)KRYI	YSQVN[Dea]KRYI	YSQVN[Deamidated (NQ)]KRYI	0.2912	0.3989	#N/A	22.79+/-1.69	0.3656	1170.6	2	586.309	#N/A	21.99	423	64	359	0	0	0	#N/A	4e-06	VACV			FALSE
20221010_MS_zenoSWATH_DC24_VACV_73C_r1.wiff	73C_r1	YSQVNKRYI	9	C53H82N14O16	YSQVN[+1]KRYI	YSQVN(unimod:7)KRYI	YSQVN[Dea]KRYI	YSQVN[Deamidated (NQ)]KRYI	0.199	0.3989	#N/A	22.79+/-1.69	0.3995	1170.6	2	586.309	#N/A	21.99	92	27	65	0	0	0	#N/A	1e-06	VACV			FALSE
20221010_MS_zenoSWATH_DC24_VACV_73C_r2.wiff	73C_r2	YSQVNKRYI	9	C53H82N14O16	YSQVN[+1]KRYI	YSQVN(unimod:7)KRYI	YSQVN[Dea]KRYI	YSQVN[Deamidated (NQ)]KRYI	0.2895	0.606	#N/A	22.79+/-1.69	0.3136	1170.6	2	586.309	#N/A	21.99	648	267	380	56	56	0	#N/A	5e-06	VACV			FALSE
20221010_MS_zenoSWATH_DC24_VACV_73C_r3.wiff	73C_r3	YSQVNKRYI	9	C53H82N14O16	YSQVN[+1]KRYI	YSQVN(unimod:7)KRYI	YSQVN[Dea]KRYI	YSQVN[Deamidated (NQ)]KRYI	0.3089	0.8059	#N/A	22.79+/-1.69	0.2688	1170.6	2	586.309	#N/A	21.99	605	315	290	13	13	0	#N/A	2e-06	VACV			FALSE
20221010_MS_zenoSWATH_DC24_VACV_37C_r1.wiff	37C_r1	YSLPNAGDVI	10	C47H73N11O16	YSLPNAGDVI	YSLPNAGDVI	YSLPNAGDVI	YSLPNAGDVI	0.9816	0.9961	#N/A	32.14+/-1.07	0	1047.52	2	524.769	#N/A	32.04	1319339	442798	876540	0	0	0	#N/A	0.001402	VACV			FALSE
20221010_MS_zenoSWATH_DC24_VACV_37C_r2.wiff	37C_r2	YSLPNAGDVI	10	C47H73N11O16	YSLPNAGDVI	YSLPNAGDVI	YSLPNAGDVI	YSLPNAGDVI	0.9704	0.9968	#N/A	32.14+/-1.07	0	1047.52	2	524.769	#N/A	32.04	989359	324725	664634	5163	0	5163	#N/A	0.001553	VACV			FALSE
20221010_MS_zenoSWATH_DC24_VACV_37C_r3.wiff	37C_r3	YSLPNAGDVI	10	C47H73N11O16	YSLPNAGDVI	YSLPNAGDVI	YSLPNAGDVI	YSLPNAGDVI	0.9717	0.997	#N/A	32.14+/-1.07	0	1047.52	2	524.769	#N/A	32.04	1056506	340999	715506	0	0	0	#N/A	0.001382	VACV			FALSE
20221010_MS_zenoSWATH_DC24_VACV_41C_r1.wiff	41C_r1	YSLPNAGDVI	10	C47H73N11O16	YSLPNAGDVI	YSLPNAGDVI	YSLPNAGDVI	YSLPNAGDVI	0.9676	0.9964	#N/A	32.14+/-1.07	0	1047.52	2	524.769	#N/A	32.04	1423625	476423	947202	10426	0	10426	#N/A	0.001736	VACV			FALSE
20221010_MS_zenoSWATH_DC24_VACV_41C_r2.wiff	41C_r2	YSLPNAGDVI	10	C47H73N11O16	YSLPNAGDVI	YSLPNAGDVI	YSLPNAGDVI	YSLPNAGDVI	0.9782	0.9978	#N/A	32.14+/-1.07	0	1047.52	2	524.769	#N/A	32.04	1076153	350604	725549	6083	0	6083	#N/A	0.001543	VACV			FALSE
20221010_MS_zenoSWATH_DC24_VACV_41C_r3.wiff	41C_r3	YSLPNAGDVI	10	C47H73N11O16	YSLPNAGDVI	YSLPNAGDVI	YSLPNAGDVI	YSLPNAGDVI	0.9769	0.9941	#N/A	32.14+/-1.07	0	1047.52	2	524.769	#N/A	32.04	865120	286674	578446	0	0	0	#N/A	0.001221	VACV			FALSE
20221010_MS_zenoSWATH_DC24_VACV_45C_r1.wiff	45C_r1	YSLPNAGDVI	10	C47H73N11O16	YSLPNAGDVI	YSLPNAGDVI	YSLPNAGDVI	YSLPNAGDVI	0.9754	0.9931	#N/A	32.14+/-1.07	0	1047.52	2	524.769	#N/A	32.04	1343948	430169	913779	7506	0	7506	#N/A	0.00147	VACV			FALSE
20221010_MS_zenoSWATH_DC24_VACV_45C_r2.wiff	45C_r2	YSLPNAGDVI	10	C47H73N11O16	YSLPNAGDVI	YSLPNAGDVI	YSLPNAGDVI	YSLPNAGDVI	0.9687	0.997	#N/A	32.14+/-1.07	0	1047.52	2	524.769	#N/A	32.04	836055	267451	568604	0	0	0	#N/A	0.001451	VACV			FALSE
20221010_MS_zenoSWATH_DC24_VACV_45C_r3.wiff	45C_r3	YSLPNAGDVI	10	C47H73N11O16	YSLPNAGDVI	YSLPNAGDVI	YSLPNAGDVI	YSLPNAGDVI	0.9699	0.9943	#N/A	32.14+/-1.07	0	1047.52	2	524.769	#N/A	32.04	1212411	389340	823071	0	0	0	#N/A	0.001398	VACV			FALSE
20221010_MS_zenoSWATH_DC24_VACV_49C_r1.wiff	49C_r1	YSLPNAGDVI	10	C47H73N11O16	YSLPNAGDVI	YSLPNAGDVI	YSLPNAGDVI	YSLPNAGDVI	0.9637	0.9932	#N/A	32.14+/-1.07	0	1047.52	2	524.769	#N/A	32.04	850674	266562	584113	2674	0	2674	#N/A	0.00179	VACV			FALSE
20221010_MS_zenoSWATH_DC24_VACV_49C_r2.wiff	49C_r2	YSLPNAGDVI	10	C47H73N11O16	YSLPNAGDVI	YSLPNAGDVI	YSLPNAGDVI	YSLPNAGDVI	0.9717	0.9951	#N/A	32.14+/-1.07	0	1047.52	2	524.769	#N/A	32.04	875611	285141	590470	15909	0	15909	#N/A	0.001411	VACV			FALSE
20221010_MS_zenoSWATH_DC24_VACV_49C_r3.wiff	49C_r3	YSLPNAGDVI	10	C47H73N11O16	YSLPNAGDVI	YSLPNAGDVI	YSLPNAGDVI	YSLPNAGDVI	0.9677	0.9964	#N/A	32.14+/-1.07	0	1047.52	2	524.769	#N/A	32.04	686186	220718	465468	2864	0	2864	#N/A	0.001554	VACV			FALSE
20221010_MS_zenoSWATH_DC24_VACV_53C_r1.wiff	53C_r1	YSLPNAGDVI	10	C47H73N11O16	YSLPNAGDVI	YSLPNAGDVI	YSLPNAGDVI	YSLPNAGDVI	0.9871	0.9947	#N/A	32.14+/-1.07	0	1047.52	2	524.769	#N/A	32.04	670548	220647	449901	1562	0	1562	#N/A	0.001263	VACV			FALSE
20221010_MS_zenoSWATH_DC24_VACV_53C_r2.wiff	53C_r2	YSLPNAGDVI	10	C47H73N11O16	YSLPNAGDVI	YSLPNAGDVI	YSLPNAGDVI	YSLPNAGDVI	0.9718	0.9974	#N/A	32.14+/-1.07	0	1047.52	2	524.769	#N/A	32.04	649252	214051	435202	8432	468	7964	#N/A	0.001558	VACV			FALSE
20221010_MS_zenoSWATH_DC24_VACV_53C_r3.wiff	53C_r3	YSLPNAGDVI	10	C47H73N11O16	YSLPNAGDVI	YSLPNAGDVI	YSLPNAGDVI	YSLPNAGDVI	0.9786	0.9925	#N/A	32.14+/-1.07	0	1047.52	2	524.769	#N/A	32.04	393397	126547	266850	5673	3232	2441	#N/A	0.001346	VACV			FALSE
20221010_MS_zenoSWATH_DC24_VACV_57C_r1.wiff	57C_r1	YSLPNAGDVI	10	C47H73N11O16	YSLPNAGDVI	YSLPNAGDVI	YSLPNAGDVI	YSLPNAGDVI	0.9418	0.9732	#N/A	32.14+/-1.07	0.0003	1047.52	2	524.769	#N/A	32.04	96704	34796	61908	0	0	0	#N/A	0.000381	VACV			FALSE
20221010_MS_zenoSWATH_DC24_VACV_57C_r2.wiff	57C_r2	YSLPNAGDVI	10	C47H73N11O16	YSLPNAGDVI	YSLPNAGDVI	YSLPNAGDVI	YSLPNAGDVI	0.9445	0.9696	#N/A	32.14+/-1.07	0	1047.52	2	524.769	#N/A	32.04	47642	19012	28630	0	0	0	#N/A	0.000258	VACV			FALSE
20221010_MS_zenoSWATH_DC24_VACV_57C_r3.wiff	57C_r3	YSLPNAGDVI	10	C47H73N11O16	YSLPNAGDVI	YSLPNAGDVI	YSLPNAGDVI	YSLPNAGDVI	0.9544	0.9498	#N/A	32.14+/-1.07	0.0003	1047.52	2	524.769	#N/A	32.04	66631	22495	44136	445	445	0	#N/A	0.000274	VACV			FALSE
20221010_MS_zenoSWATH_DC24_VACV_61C_r1.wiff	61C_r1	YSLPNAGDVI	10	C47H73N11O16	YSLPNAGDVI	YSLPNAGDVI	YSLPNAGDVI	YSLPNAGDVI	0.7776	0.8943	#N/A	32.14+/-1.07	0.0387	1047.52	2	524.769	#N/A	32.04	24001	9225	14775	18	18	0	#N/A	6.1e-05	VACV			FALSE
20221010_MS_zenoSWATH_DC24_VACV_61C_r2.wiff	61C_r2	YSLPNAGDVI	10	C47H73N11O16	YSLPNAGDVI	YSLPNAGDVI	YSLPNAGDVI	YSLPNAGDVI	0.3749	0.73	#N/A	32.14+/-1.07	0.0479	1047.52	2	524.769	#N/A	32.04	3690	827	2863	220	220	0	#N/A	1.1e-05	VACV			FALSE
20221010_MS_zenoSWATH_DC24_VACV_61C_r3.wiff	61C_r3	YSLPNAGDVI	10	C47H73N11O16	YSLPNAGDVI	YSLPNAGDVI	YSLPNAGDVI	YSLPNAGDVI	0.7414	0.9295	#N/A	32.14+/-1.07	0	1047.52	2	524.769	#N/A	32.04	10958	2961	7997	175	175	0	#N/A	3.7e-05	VACV			FALSE
20221010_MS_zenoSWATH_DC24_VACV_65C_r1.wiff	65C_r1	YSLPNAGDVI	10	C47H73N11O16	YSLPNAGDVI	YSLPNAGDVI	YSLPNAGDVI	YSLPNAGDVI	0.4564	0.2678	#N/A	32.14+/-1.07	0.0443	1047.52	2	524.769	#N/A	32.04	7918	4898	3020	3440	3440	0	#N/A	2.6e-05	VACV			FALSE
20221010_MS_zenoSWATH_DC24_VACV_65C_r2.wiff	65C_r2	YSLPNAGDVI	10	C47H73N11O16	YSLPNAGDVI	YSLPNAGDVI	YSLPNAGDVI	YSLPNAGDVI	0.456	0.2148	#N/A	32.14+/-1.07	0.2897	1047.52	2	524.769	#N/A	32.04	785	93	692	0	0	0	#N/A	5e-06	VACV			FALSE
20221010_MS_zenoSWATH_DC24_VACV_65C_r3.wiff	65C_r3	YSLPNAGDVI	10	C47H73N11O16	YSLPNAGDVI	YSLPNAGDVI	YSLPNAGDVI	YSLPNAGDVI	0.657	0.3628	#N/A	32.14+/-1.07	0.1115	1047.52	2	524.769	#N/A	32.04	4351	1885	2466	0	0	0	#N/A	1.4e-05	VACV			FALSE
20221010_MS_zenoSWATH_DC24_VACV_69C_r1.wiff	69C_r1	YSLPNAGDVI	10	C47H73N11O16	YSLPNAGDVI	YSLPNAGDVI	YSLPNAGDVI	YSLPNAGDVI	0.6344	0.4532	#N/A	32.14+/-1.07	0.0575	1047.52	2	524.769	#N/A	32.04	12307	4259	8048	0	0	0	#N/A	4.9e-05	VACV			FALSE
20221010_MS_zenoSWATH_DC24_VACV_69C_r2.wiff	69C_r2	YSLPNAGDVI	10	C47H73N11O16	YSLPNAGDVI	YSLPNAGDVI	YSLPNAGDVI	YSLPNAGDVI	0.6357	0.5251	#N/A	32.14+/-1.07	0.0194	1047.52	2	524.769	#N/A	32.04	12885	5933	6952	142	142	0	#N/A	4.8e-05	VACV			FALSE
20221010_MS_zenoSWATH_DC24_VACV_69C_r3.wiff	69C_r3	YSLPNAGDVI	10	C47H73N11O16	YSLPNAGDVI	YSLPNAGDVI	YSLPNAGDVI	YSLPNAGDVI	0.2423	0.9433	#N/A	32.14+/-1.07	0.3773	1047.52	2	524.769	#N/A	32.04	1500	803	697	0	0	0	#N/A	1.3e-05	VACV			FALSE
20221010_MS_zenoSWATH_DC24_VACV_73C_r1.wiff	73C_r1	YSLPNAGDVI	10	C47H73N11O16	YSLPNAGDVI	YSLPNAGDVI	YSLPNAGDVI	YSLPNAGDVI	0.4586	0.4233	#N/A	32.14+/-1.07	0.138	1047.52	2	524.769	#N/A	32.04	5411	2091	3320	0	0	0	#N/A	3.3e-05	VACV			FALSE
20221010_MS_zenoSWATH_DC24_VACV_73C_r2.wiff	73C_r2	YSLPNAGDVI	10	C47H73N11O16	YSLPNAGDVI	YSLPNAGDVI	YSLPNAGDVI	YSLPNAGDVI	0.3248	0.3681	#N/A	32.14+/-1.07	0.1988	1047.52	2	524.769	#N/A	32.04	15505	13357	2149	37	37	0	#N/A	0.000125	VACV			FALSE
20221010_MS_zenoSWATH_DC24_VACV_73C_r3.wiff	73C_r3	YSLPNAGDVI	10	C47H73N11O16	YSLPNAGDVI	YSLPNAGDVI	YSLPNAGDVI	YSLPNAGDVI	0.6231	0.3419	#N/A	32.14+/-1.07	0.0207	1047.52	2	524.769	#N/A	32.04	24713	7891	16821	72	72	0	#N/A	9.1e-05	VACV			FALSE
20221010_MS_zenoSWATH_DC24_VACV_37C_r1.wiff	37C_r1	YSLPNAGDVI	10	C47H72N10O17	YSLPN[+1]AGDVI	YSLPN(unimod:7)AGDVI	YSLPN[Dea]AGDVI	YSLPN[Deamidated (NQ)]AGDVI	0.9251	0.2151	#N/A	32.27+/-1.16	0	1048.51	2	525.261	#N/A	32.01	396975	4794	392180	0	0	0	#N/A	0.000422	VACV			FALSE
20221010_MS_zenoSWATH_DC24_VACV_37C_r2.wiff	37C_r2	YSLPNAGDVI	10	C47H72N10O17	YSLPN[+1]AGDVI	YSLPN(unimod:7)AGDVI	YSLPN[Dea]AGDVI	YSLPN[Deamidated (NQ)]AGDVI	0.9092	0.3329	#N/A	32.27+/-1.16	0	1048.51	2	525.261	#N/A	32.01	303054	3198	299856	190	190	0	#N/A	0.000476	VACV			FALSE
20221010_MS_zenoSWATH_DC24_VACV_37C_r3.wiff	37C_r3	YSLPNAGDVI	10	C47H72N10O17	YSLPN[+1]AGDVI	YSLPN(unimod:7)AGDVI	YSLPN[Dea]AGDVI	YSLPN[Deamidated (NQ)]AGDVI	0.9194	0.3501	#N/A	32.27+/-1.16	0	1048.51	2	525.261	#N/A	32.01	332920	3020	329900	1629	1629	0	#N/A	0.000436	VACV			FALSE
20221010_MS_zenoSWATH_DC24_VACV_41C_r1.wiff	41C_r1	YSLPNAGDVI	10	C47H72N10O17	YSLPN[+1]AGDVI	YSLPN(unimod:7)AGDVI	YSLPN[Dea]AGDVI	YSLPN[Deamidated (NQ)]AGDVI	0.9135	0.3557	#N/A	32.27+/-1.16	0	1048.51	2	525.261	#N/A	32.01	438630	3023	435607	0	0	0	#N/A	0.000535	VACV			FALSE
20221010_MS_zenoSWATH_DC24_VACV_41C_r2.wiff	41C_r2	YSLPNAGDVI	10	C47H72N10O17	YSLPN[+1]AGDVI	YSLPN(unimod:7)AGDVI	YSLPN[Dea]AGDVI	YSLPN[Deamidated (NQ)]AGDVI	0.8883	0.3226	#N/A	32.27+/-1.16	0.0002	1048.51	2	525.261	#N/A	32.01	327037	3153	323884	367	0	367	#N/A	0.000469	VACV			FALSE
20221010_MS_zenoSWATH_DC24_VACV_41C_r3.wiff	41C_r3	YSLPNAGDVI	10	C47H72N10O17	YSLPN[+1]AGDVI	YSLPN(unimod:7)AGDVI	YSLPN[Dea]AGDVI	YSLPN[Deamidated (NQ)]AGDVI	0.9095	0.374	#N/A	32.27+/-1.16	0.0003	1048.51	2	525.261	#N/A	32.01	239877	1767	238110	0	0	0	#N/A	0.000339	VACV			FALSE
20221010_MS_zenoSWATH_DC24_VACV_45C_r1.wiff	45C_r1	YSLPNAGDVI	10	C47H72N10O17	YSLPN[+1]AGDVI	YSLPN(unimod:7)AGDVI	YSLPN[Dea]AGDVI	YSLPN[Deamidated (NQ)]AGDVI	0.9046	0.3081	#N/A	32.27+/-1.16	0	1048.51	2	525.261	#N/A	32.01	409028	3951	405077	1280	463	817	#N/A	0.000447	VACV			FALSE
20221010_MS_zenoSWATH_DC24_VACV_45C_r2.wiff	45C_r2	YSLPNAGDVI	10	C47H72N10O17	YSLPN[+1]AGDVI	YSLPN(unimod:7)AGDVI	YSLPN[Dea]AGDVI	YSLPN[Deamidated (NQ)]AGDVI	0.896	0.3457	#N/A	32.27+/-1.16	0.0002	1048.51	2	525.261	#N/A	32.01	243738	3384	240354	0	0	0	#N/A	0.000423	VACV			FALSE
20221010_MS_zenoSWATH_DC24_VACV_45C_r3.wiff	45C_r3	YSLPNAGDVI	10	C47H72N10O17	YSLPN[+1]AGDVI	YSLPN(unimod:7)AGDVI	YSLPN[Dea]AGDVI	YSLPN[Deamidated (NQ)]AGDVI	0.9055	0.3312	#N/A	32.27+/-1.16	0	1048.51	2	525.261	#N/A	32.01	363862	1610	362253	1718	0	1718	#N/A	0.00042	VACV			FALSE
20221010_MS_zenoSWATH_DC24_VACV_49C_r1.wiff	49C_r1	YSLPNAGDVI	10	C47H72N10O17	YSLPN[+1]AGDVI	YSLPN(unimod:7)AGDVI	YSLPN[Dea]AGDVI	YSLPN[Deamidated (NQ)]AGDVI	0.8872	0.3438	#N/A	32.27+/-1.16	0.0003	1048.51	2	525.261	#N/A	32.01	244817	1747	243070	0	0	0	#N/A	0.000515	VACV			FALSE
20221010_MS_zenoSWATH_DC24_VACV_49C_r2.wiff	49C_r2	YSLPNAGDVI	10	C47H72N10O17	YSLPN[+1]AGDVI	YSLPN(unimod:7)AGDVI	YSLPN[Dea]AGDVI	YSLPN[Deamidated (NQ)]AGDVI	0.9308	0.2151	#N/A	32.27+/-1.16	0	1048.51	2	525.261	#N/A	32.01	269083	1334	267749	0	0	0	#N/A	0.000434	VACV			FALSE
20221010_MS_zenoSWATH_DC24_VACV_49C_r3.wiff	49C_r3	YSLPNAGDVI	10	C47H72N10O17	YSLPN[+1]AGDVI	YSLPN(unimod:7)AGDVI	YSLPN[Dea]AGDVI	YSLPN[Deamidated (NQ)]AGDVI	0.9066	0.3985	#N/A	32.27+/-1.16	0	1048.51	2	525.261	#N/A	32.01	202065	1641	200424	0	0	0	#N/A	0.000458	VACV			FALSE
20221010_MS_zenoSWATH_DC24_VACV_53C_r1.wiff	53C_r1	YSLPNAGDVI	10	C47H72N10O17	YSLPN[+1]AGDVI	YSLPN(unimod:7)AGDVI	YSLPN[Dea]AGDVI	YSLPN[Deamidated (NQ)]AGDVI	0.9049	0.5659	#N/A	32.27+/-1.16	0	1048.51	2	525.261	#N/A	32.01	196065	709	195356	0	0	0	#N/A	0.000369	VACV			FALSE
20221010_MS_zenoSWATH_DC24_VACV_53C_r2.wiff	53C_r2	YSLPNAGDVI	10	C47H72N10O17	YSLPN[+1]AGDVI	YSLPN(unimod:7)AGDVI	YSLPN[Dea]AGDVI	YSLPN[Deamidated (NQ)]AGDVI	0.9074	0.3214	#N/A	32.27+/-1.16	0	1048.51	2	525.261	#N/A	32.01	207176	1250	205925	166	166	0	#N/A	0.000497	VACV			FALSE
20221010_MS_zenoSWATH_DC24_VACV_53C_r3.wiff	53C_r3	YSLPNAGDVI	10	C47H72N10O17	YSLPN[+1]AGDVI	YSLPN(unimod:7)AGDVI	YSLPN[Dea]AGDVI	YSLPN[Deamidated (NQ)]AGDVI	0.9119	0.453	#N/A	32.27+/-1.16	0	1048.51	2	525.261	#N/A	32.01	128019	2959	125060	0	0	0	#N/A	0.000438	VACV			FALSE
20221010_MS_zenoSWATH_DC24_VACV_57C_r1.wiff	57C_r1	YSLPNAGDVI	10	C47H72N10O17	YSLPN[+1]AGDVI	YSLPN(unimod:7)AGDVI	YSLPN[Dea]AGDVI	YSLPN[Deamidated (NQ)]AGDVI	0.8596	0.4329	#N/A	32.27+/-1.16	0.0006	1048.51	2	525.261	#N/A	32.01	23709	522	23187	0	0	0	#N/A	9.3e-05	VACV			FALSE
20221010_MS_zenoSWATH_DC24_VACV_57C_r2.wiff	57C_r2	YSLPNAGDVI	10	C47H72N10O17	YSLPN[+1]AGDVI	YSLPN(unimod:7)AGDVI	YSLPN[Dea]AGDVI	YSLPN[Deamidated (NQ)]AGDVI	0.8327	0.673	#N/A	32.27+/-1.16	0.0021	1048.51	2	525.261	#N/A	32.01	14504	1827	12677	0	0	0	#N/A	7.8e-05	VACV			FALSE
20221010_MS_zenoSWATH_DC24_VACV_57C_r3.wiff	57C_r3	YSLPNAGDVI	10	C47H72N10O17	YSLPN[+1]AGDVI	YSLPN(unimod:7)AGDVI	YSLPN[Dea]AGDVI	YSLPN[Deamidated (NQ)]AGDVI	0.8631	0.4297	#N/A	32.27+/-1.16	0.0033	1048.51	2	525.261	#N/A	32.01	15326	498	14829	0	0	0	#N/A	6.3e-05	VACV			FALSE
20221010_MS_zenoSWATH_DC24_VACV_61C_r1.wiff	61C_r1	YSLPNAGDVI	10	C47H72N10O17	YSLPN[+1]AGDVI	YSLPN(unimod:7)AGDVI	YSLPN[Dea]AGDVI	YSLPN[Deamidated (NQ)]AGDVI	0.939	0.448	#N/A	32.27+/-1.16	0.0031	1048.51	2	525.261	#N/A	32.01	8065	954	7111	0	0	0	#N/A	2e-05	VACV			FALSE
20221010_MS_zenoSWATH_DC24_VACV_61C_r2.wiff	61C_r2	YSLPNAGDVI	10	C47H72N10O17	YSLPN[+1]AGDVI	YSLPN(unimod:7)AGDVI	YSLPN[Dea]AGDVI	YSLPN[Deamidated (NQ)]AGDVI	0.3049	0.5183	#N/A	32.27+/-1.16	0.1765	1048.51	2	525.261	#N/A	32.01	3895	514	3381	0	0	0	#N/A	1.2e-05	VACV			FALSE
20221010_MS_zenoSWATH_DC24_VACV_61C_r3.wiff	61C_r3	YSLPNAGDVI	10	C47H72N10O17	YSLPN[+1]AGDVI	YSLPN(unimod:7)AGDVI	YSLPN[Dea]AGDVI	YSLPN[Deamidated (NQ)]AGDVI	0.6179	0.8165	#N/A	32.27+/-1.16	0.0443	1048.51	2	525.261	#N/A	32.01	2036	596	1440	81	81	0	#N/A	7e-06	VACV			FALSE
20221010_MS_zenoSWATH_DC24_VACV_65C_r1.wiff	65C_r1	YSLPNAGDVI	10	C47H72N10O17	YSLPN[+1]AGDVI	YSLPN(unimod:7)AGDVI	YSLPN[Dea]AGDVI	YSLPN[Deamidated (NQ)]AGDVI	0.5328	0.7195	#N/A	32.27+/-1.16	0.1081	1048.51	2	525.261	#N/A	32.01	7318	658	6661	0	0	0	#N/A	2.4e-05	VACV			FALSE
20221010_MS_zenoSWATH_DC24_VACV_65C_r2.wiff	65C_r2	YSLPNAGDVI	10	C47H72N10O17	YSLPN[+1]AGDVI	YSLPN(unimod:7)AGDVI	YSLPN[Dea]AGDVI	YSLPN[Deamidated (NQ)]AGDVI	0.406	0.7492	#N/A	32.27+/-1.16	0.4009	1048.51	2	525.261	#N/A	32.01	2838	1166	1672	0	0	0	#N/A	1.9e-05	VACV			FALSE
20221010_MS_zenoSWATH_DC24_VACV_65C_r3.wiff	65C_r3	YSLPNAGDVI	10	C47H72N10O17	YSLPN[+1]AGDVI	YSLPN(unimod:7)AGDVI	YSLPN[Dea]AGDVI	YSLPN[Deamidated (NQ)]AGDVI	0.5241	0.7793	#N/A	32.27+/-1.16	0.2459	1048.51	2	525.261	#N/A	32.01	1653	59	1594	0	0	0	#N/A	5e-06	VACV			FALSE
20221010_MS_zenoSWATH_DC24_VACV_69C_r1.wiff	69C_r1	YSLPNAGDVI	10	C47H72N10O17	YSLPN[+1]AGDVI	YSLPN(unimod:7)AGDVI	YSLPN[Dea]AGDVI	YSLPN[Deamidated (NQ)]AGDVI	0.5381	0.6369	#N/A	32.27+/-1.16	0.1661	1048.51	2	525.261	#N/A	32.01	27827	4846	22981	995	995	0	#N/A	0.00011	VACV			FALSE
20221010_MS_zenoSWATH_DC24_VACV_69C_r2.wiff	69C_r2	YSLPNAGDVI	10	C47H72N10O17	YSLPN[+1]AGDVI	YSLPN(unimod:7)AGDVI	YSLPN[Dea]AGDVI	YSLPN[Deamidated (NQ)]AGDVI	0.457	0.5968	#N/A	32.27+/-1.16	0.3061	1048.51	2	525.261	#N/A	32.01	21235	4140	17095	662	662	0	#N/A	7.9e-05	VACV			FALSE
20221010_MS_zenoSWATH_DC24_VACV_69C_r3.wiff	69C_r3	YSLPNAGDVI	10	C47H72N10O17	YSLPN[+1]AGDVI	YSLPN(unimod:7)AGDVI	YSLPN[Dea]AGDVI	YSLPN[Deamidated (NQ)]AGDVI	0.435	0.6667	#N/A	32.27+/-1.16	0.2917	1048.51	2	525.261	#N/A	32.01	6843	1777	5067	0	0	0	#N/A	5.9e-05	VACV			FALSE
20221010_MS_zenoSWATH_DC24_VACV_73C_r1.wiff	73C_r1	YSLPNAGDVI	10	C47H72N10O17	YSLPN[+1]AGDVI	YSLPN(unimod:7)AGDVI	YSLPN[Dea]AGDVI	YSLPN[Deamidated (NQ)]AGDVI	0.4314	0.6131	#N/A	32.27+/-1.16	0.2877	1048.51	2	525.261	#N/A	32.01	13886	2763	11123	49	49	0	#N/A	8.5e-05	VACV			FALSE
20221010_MS_zenoSWATH_DC24_VACV_73C_r2.wiff	73C_r2	YSLPNAGDVI	10	C47H72N10O17	YSLPN[+1]AGDVI	YSLPN(unimod:7)AGDVI	YSLPN[Dea]AGDVI	YSLPN[Deamidated (NQ)]AGDVI	0.5067	0.5668	#N/A	32.27+/-1.16	0.1738	1048.51	2	525.261	#N/A	32.01	24137	3234	20903	273	273	0	#N/A	0.000195	VACV			FALSE
20221010_MS_zenoSWATH_DC24_VACV_73C_r3.wiff	73C_r3	YSLPNAGDVI	10	C47H72N10O17	YSLPN[+1]AGDVI	YSLPN(unimod:7)AGDVI	YSLPN[Dea]AGDVI	YSLPN[Deamidated (NQ)]AGDVI	0.4976	0.5713	#N/A	32.27+/-1.16	0.2398	1048.51	2	525.261	#N/A	32.01	47066	6069	40996	0	0	0	#N/A	0.000174	VACV			FALSE
20221010_MS_zenoSWATH_DC24_VACV_37C_r1.wiff	37C_r1	LNFRFENV	8	C48H71N13O13	LNFRFENV	LNFRFENV	LNFRFENV	LNFRFENV	0.9506	0.9971	#N/A	28.63+/-0.03	0	1037.53	2	519.772	#N/A	28.62	3421894	1491885	1930009	32973	14148	18825	#N/A	0.003635	VACV			FALSE
20221010_MS_zenoSWATH_DC24_VACV_37C_r2.wiff	37C_r2	LNFRFENV	8	C48H71N13O13	LNFRFENV	LNFRFENV	LNFRFENV	LNFRFENV	0.956	0.9961	#N/A	28.63+/-0.03	0	1037.53	2	519.772	#N/A	28.62	2329895	1001215	1328680	7389	4770	2619	#N/A	0.003658	VACV			FALSE
20221010_MS_zenoSWATH_DC24_VACV_37C_r3.wiff	37C_r3	LNFRFENV	8	C48H71N13O13	LNFRFENV	LNFRFENV	LNFRFENV	LNFRFENV	0.9556	0.9976	#N/A	28.63+/-0.03	0	1037.53	2	519.772	#N/A	28.62	2627262	1139052	1488209	7212	2368	4845	#N/A	0.003437	VACV			FALSE
20221010_MS_zenoSWATH_DC24_VACV_41C_r1.wiff	41C_r1	LNFRFENV	8	C48H71N13O13	LNFRFENV	LNFRFENV	LNFRFENV	LNFRFENV	0.9516	0.9978	#N/A	28.63+/-0.03	0	1037.53	2	519.772	#N/A	28.62	2510185	1091468	1418718	13045	9866	3179	#N/A	0.00306	VACV			FALSE
20221010_MS_zenoSWATH_DC24_VACV_41C_r2.wiff	41C_r2	LNFRFENV	8	C48H71N13O13	LNFRFENV	LNFRFENV	LNFRFENV	LNFRFENV	0.9517	0.9992	#N/A	28.63+/-0.03	0	1037.53	2	519.772	#N/A	28.62	2420032	1044713	1375319	10651	3899	6751	#N/A	0.00347	VACV			FALSE
20221010_MS_zenoSWATH_DC24_VACV_41C_r3.wiff	41C_r3	LNFRFENV	8	C48H71N13O13	LNFRFENV	LNFRFENV	LNFRFENV	LNFRFENV	0.9572	0.9988	#N/A	28.63+/-0.03	0	1037.53	2	519.772	#N/A	28.62	2562244	1066495	1495749	4279	4279	0	#N/A	0.003617	VACV			FALSE
20221010_MS_zenoSWATH_DC24_VACV_45C_r1.wiff	45C_r1	LNFRFENV	8	C48H71N13O13	LNFRFENV	LNFRFENV	LNFRFENV	LNFRFENV	0.9545	0.9972	#N/A	28.63+/-0.03	0	1037.53	2	519.772	#N/A	28.62	2917005	1248752	1668253	15778	3459	12319	#N/A	0.00319	VACV			FALSE
20221010_MS_zenoSWATH_DC24_VACV_45C_r2.wiff	45C_r2	LNFRFENV	8	C48H71N13O13	LNFRFENV	LNFRFENV	LNFRFENV	LNFRFENV	0.9596	0.9968	#N/A	28.63+/-0.03	0	1037.53	2	519.772	#N/A	28.62	1877636	788617	1089019	3668	3668	0	#N/A	0.003259	VACV			FALSE
20221010_MS_zenoSWATH_DC24_VACV_45C_r3.wiff	45C_r3	LNFRFENV	8	C48H71N13O13	LNFRFENV	LNFRFENV	LNFRFENV	LNFRFENV	0.9531	0.9963	#N/A	28.63+/-0.03	0	1037.53	2	519.772	#N/A	28.62	2919024	1246049	1672975	14925	4894	10031	#N/A	0.003366	VACV			FALSE
20221010_MS_zenoSWATH_DC24_VACV_49C_r1.wiff	49C_r1	LNFRFENV	8	C48H71N13O13	LNFRFENV	LNFRFENV	LNFRFENV	LNFRFENV	0.951	0.9951	#N/A	28.63+/-0.03	0	1037.53	2	519.772	#N/A	28.62	575133	248276	326858	0	0	0	#N/A	0.00121	VACV			FALSE
20221010_MS_zenoSWATH_DC24_VACV_49C_r2.wiff	49C_r2	LNFRFENV	8	C48H71N13O13	LNFRFENV	LNFRFENV	LNFRFENV	LNFRFENV	0.9602	0.9991	#N/A	28.63+/-0.03	0	1037.53	2	519.772	#N/A	28.62	1688349	728369	959980	4281	4281	0	#N/A	0.00272	VACV			FALSE
20221010_MS_zenoSWATH_DC24_VACV_49C_r3.wiff	49C_r3	LNFRFENV	8	C48H71N13O13	LNFRFENV	LNFRFENV	LNFRFENV	LNFRFENV	0.9612	0.998	#N/A	28.63+/-0.03	0	1037.53	2	519.772	#N/A	28.62	1167801	487116	680685	1891	1891	0	#N/A	0.002645	VACV			FALSE
20221010_MS_zenoSWATH_DC24_VACV_53C_r1.wiff	53C_r1	LNFRFENV	8	C48H71N13O13	LNFRFENV	LNFRFENV	LNFRFENV	LNFRFENV	0.9656	0.9963	#N/A	28.63+/-0.03	0	1037.53	2	519.772	#N/A	28.62	1061818	449758	612060	5541	4589	952	#N/A	0.001999	VACV			FALSE
20221010_MS_zenoSWATH_DC24_VACV_53C_r2.wiff	53C_r2	LNFRFENV	8	C48H71N13O13	LNFRFENV	LNFRFENV	LNFRFENV	LNFRFENV	0.9561	0.9963	#N/A	28.63+/-0.03	0	1037.53	2	519.772	#N/A	28.62	589188	246746	342442	46	46	0	#N/A	0.001414	VACV			FALSE
20221010_MS_zenoSWATH_DC24_VACV_53C_r3.wiff	53C_r3	LNFRFENV	8	C48H71N13O13	LNFRFENV	LNFRFENV	LNFRFENV	LNFRFENV	0.9599	0.9963	#N/A	28.63+/-0.03	0	1037.53	2	519.772	#N/A	28.62	560766	231250	329516	304	304	0	#N/A	0.001918	VACV			FALSE
20221010_MS_zenoSWATH_DC24_VACV_57C_r1.wiff	57C_r1	LNFRFENV	8	C48H71N13O13	LNFRFENV	LNFRFENV	LNFRFENV	LNFRFENV	0.9349	0.9961	#N/A	28.63+/-0.03	0	1037.53	2	519.772	#N/A	28.62	90937	41485	49452	0	0	0	#N/A	0.000358	VACV			FALSE
20221010_MS_zenoSWATH_DC24_VACV_57C_r2.wiff	57C_r2	LNFRFENV	8	C48H71N13O13	LNFRFENV	LNFRFENV	LNFRFENV	LNFRFENV	0.9134	0.9721	#N/A	28.63+/-0.03	0	1037.53	2	519.772	#N/A	28.62	37578	17154	20424	21	21	0	#N/A	0.000203	VACV			FALSE
20221010_MS_zenoSWATH_DC24_VACV_57C_r3.wiff	57C_r3	LNFRFENV	8	C48H71N13O13	LNFRFENV	LNFRFENV	LNFRFENV	LNFRFENV	0.9375	0.9605	#N/A	28.63+/-0.03	0	1037.53	2	519.772	#N/A	28.62	45359	20232	25127	0	0	0	#N/A	0.000187	VACV			FALSE
20221010_MS_zenoSWATH_DC24_VACV_61C_r1.wiff	61C_r1	LNFRFENV	8	C48H71N13O13	LNFRFENV	LNFRFENV	LNFRFENV	LNFRFENV	0.8963	0.9669	#N/A	28.63+/-0.03	0	1037.53	2	519.772	#N/A	28.62	43201	20924	22277	0	0	0	#N/A	0.000109	VACV			FALSE
20221010_MS_zenoSWATH_DC24_VACV_61C_r2.wiff	61C_r2	LNFRFENV	8	C48H71N13O13	LNFRFENV	LNFRFENV	LNFRFENV	LNFRFENV	0.8821	0.9742	#N/A	28.63+/-0.03	0	1037.53	2	519.772	#N/A	28.62	23972	11797	12175	336	336	0	#N/A	7.2e-05	VACV			FALSE
20221010_MS_zenoSWATH_DC24_VACV_61C_r3.wiff	61C_r3	LNFRFENV	8	C48H71N13O13	LNFRFENV	LNFRFENV	LNFRFENV	LNFRFENV	0.9179	0.9507	#N/A	28.63+/-0.03	0	1037.53	2	519.772	#N/A	28.62	30094	11784	18310	945	945	0	#N/A	0.000102	VACV			FALSE
20221010_MS_zenoSWATH_DC24_VACV_65C_r1.wiff	65C_r1	LNFRFENV	8	C48H71N13O13	LNFRFENV	LNFRFENV	LNFRFENV	LNFRFENV	0.824	0.9261	#N/A	28.63+/-0.03	0	1037.53	2	519.772	#N/A	28.62	19552	8324	11228	470	470	0	#N/A	6.4e-05	VACV			FALSE
20221010_MS_zenoSWATH_DC24_VACV_65C_r2.wiff	65C_r2	LNFRFENV	8	C48H71N13O13	LNFRFENV	LNFRFENV	LNFRFENV	LNFRFENV	0.6782	0.9494	#N/A	28.63+/-0.03	0.07	1037.53	2	519.772	#N/A	28.62	2576	795	1781	532	532	0	#N/A	1.8e-05	VACV			FALSE
20221010_MS_zenoSWATH_DC24_VACV_65C_r3.wiff	65C_r3	LNFRFENV	8	C48H71N13O13	LNFRFENV	LNFRFENV	LNFRFENV	LNFRFENV	0.8445	0.9318	#N/A	28.63+/-0.03	0	1037.53	2	519.772	#N/A	28.62	15745	7655	8090	0	0	0	#N/A	4.9e-05	VACV			FALSE
20221010_MS_zenoSWATH_DC24_VACV_69C_r1.wiff	69C_r1	LNFRFENV	8	C48H71N13O13	LNFRFENV	LNFRFENV	LNFRFENV	LNFRFENV	0.7934	0.9633	#N/A	28.63+/-0.03	0.0032	1037.53	2	519.772	#N/A	28.62	8923	4562	4361	3	3	0	#N/A	3.5e-05	VACV			FALSE
20221010_MS_zenoSWATH_DC24_VACV_69C_r2.wiff	69C_r2	LNFRFENV	8	C48H71N13O13	LNFRFENV	LNFRFENV	LNFRFENV	LNFRFENV	0.8733	0.959	#N/A	28.63+/-0.03	0.0058	1037.53	2	519.772	#N/A	28.62	17549	9773	7775	17	17	0	#N/A	6.6e-05	VACV			FALSE
20221010_MS_zenoSWATH_DC24_VACV_69C_r3.wiff	69C_r3	LNFRFENV	8	C48H71N13O13	LNFRFENV	LNFRFENV	LNFRFENV	LNFRFENV	0.7826	0.884	#N/A	28.63+/-0.03	0.1415	1037.53	2	519.772	#N/A	28.62	3332	1952	1380	0	0	0	#N/A	2.9e-05	VACV			FALSE
20221010_MS_zenoSWATH_DC24_VACV_73C_r1.wiff	73C_r1	LNFRFENV	8	C48H71N13O13	LNFRFENV	LNFRFENV	LNFRFENV	LNFRFENV	0.6974	0.8961	#N/A	28.63+/-0.03	0.0565	1037.53	2	519.772	#N/A	28.62	2849	1887	962	23	23	0	#N/A	1.8e-05	VACV			FALSE
20221010_MS_zenoSWATH_DC24_VACV_73C_r2.wiff	73C_r2	LNFRFENV	8	C48H71N13O13	LNFRFENV	LNFRFENV	LNFRFENV	LNFRFENV	0.6035	0.8304	#N/A	28.63+/-0.03	0.0392	1037.53	2	519.772	#N/A	28.62	2975	1527	1448	718	718	0	#N/A	2.4e-05	VACV			FALSE
20221010_MS_zenoSWATH_DC24_VACV_73C_r3.wiff	73C_r3	LNFRFENV	8	C48H71N13O13	LNFRFENV	LNFRFENV	LNFRFENV	LNFRFENV	0.733	0.8497	#N/A	28.63+/-0.03	0.061	1037.53	2	519.772	#N/A	28.62	7587	3228	4359	2539	2539	0	#N/A	2.8e-05	VACV			FALSE
20221010_MS_zenoSWATH_DC24_VACV_37C_r1.wiff	37C_r1	SIFRFLNI	8	C49H76N12O11	SIFRFLNI	SIFRFLNI	SIFRFLNI	SIFRFLNI	0.937	0.9724	#N/A	40.08+/-0.07	0	1008.58	2	505.295	#N/A	40.05	1922642	584895	1337747	22288	13907	8381	#N/A	0.002043	VACV			FALSE
20221010_MS_zenoSWATH_DC24_VACV_37C_r2.wiff	37C_r2	SIFRFLNI	8	C49H76N12O11	SIFRFLNI	SIFRFLNI	SIFRFLNI	SIFRFLNI	0.9122	0.9811	#N/A	40.08+/-0.07	0	1008.58	2	505.295	#N/A	40.05	977600	282149	695451	9533	4265	5268	#N/A	0.001535	VACV			FALSE
20221010_MS_zenoSWATH_DC24_VACV_37C_r3.wiff	37C_r3	SIFRFLNI	8	C49H76N12O11	SIFRFLNI	SIFRFLNI	SIFRFLNI	SIFRFLNI	0.8714	0.9811	#N/A	40.08+/-0.07	0	1008.58	2	505.295	#N/A	40.05	803470	217427	586042	11316	6717	4599	#N/A	0.001051	VACV			FALSE
20221010_MS_zenoSWATH_DC24_VACV_41C_r1.wiff	41C_r1	SIFRFLNI	8	C49H76N12O11	SIFRFLNI	SIFRFLNI	SIFRFLNI	SIFRFLNI	0.8613	0.9163	#N/A	40.08+/-0.07	0	1008.58	2	505.295	#N/A	40.05	517069	141601	375468	2143	2143	0	#N/A	0.00063	VACV			FALSE
20221010_MS_zenoSWATH_DC24_VACV_41C_r2.wiff	41C_r2	SIFRFLNI	8	C49H76N12O11	SIFRFLNI	SIFRFLNI	SIFRFLNI	SIFRFLNI	0.8747	0.9911	#N/A	40.08+/-0.07	0	1008.58	2	505.295	#N/A	40.05	649809	181692	468117	2965	2965	0	#N/A	0.000932	VACV			FALSE
20221010_MS_zenoSWATH_DC24_VACV_41C_r3.wiff	41C_r3	SIFRFLNI	8	C49H76N12O11	SIFRFLNI	SIFRFLNI	SIFRFLNI	SIFRFLNI	0.9391	0.9863	#N/A	40.08+/-0.07	0	1008.58	2	505.295	#N/A	40.05	1239628	382291	857336	19585	8427	11159	#N/A	0.00175	VACV			FALSE
20221010_MS_zenoSWATH_DC24_VACV_45C_r1.wiff	45C_r1	SIFRFLNI	8	C49H76N12O11	SIFRFLNI	SIFRFLNI	SIFRFLNI	SIFRFLNI	0.9384	0.9329	#N/A	40.08+/-0.07	0	1008.58	2	505.295	#N/A	40.05	2705214	794217	1910997	61613	24084	37529	#N/A	0.002959	VACV			FALSE
20221010_MS_zenoSWATH_DC24_VACV_45C_r2.wiff	45C_r2	SIFRFLNI	8	C49H76N12O11	SIFRFLNI	SIFRFLNI	SIFRFLNI	SIFRFLNI	0.9291	0.9934	#N/A	40.08+/-0.07	0	1008.58	2	505.295	#N/A	40.05	1170261	354904	815357	9022	7388	1634	#N/A	0.002031	VACV			FALSE
20221010_MS_zenoSWATH_DC24_VACV_45C_r3.wiff	45C_r3	SIFRFLNI	8	C49H76N12O11	SIFRFLNI	SIFRFLNI	SIFRFLNI	SIFRFLNI	0.9442	0.9657	#N/A	40.08+/-0.07	0	1008.58	2	505.295	#N/A	40.05	2327812	706610	1621202	31473	17233	14239	#N/A	0.002684	VACV			FALSE
20221010_MS_zenoSWATH_DC24_VACV_49C_r1.wiff	49C_r1	SIFRFLNI	8	C49H76N12O11	SIFRFLNI	SIFRFLNI	SIFRFLNI	SIFRFLNI	0.9181	0.9449	#N/A	40.08+/-0.07	0	1008.58	2	505.295	#N/A	40.05	1330383	387807	942576	6900	6900	0	#N/A	0.002799	VACV			FALSE
20221010_MS_zenoSWATH_DC24_VACV_49C_r2.wiff	49C_r2	SIFRFLNI	8	C49H76N12O11	SIFRFLNI	SIFRFLNI	SIFRFLNI	SIFRFLNI	0.8828	0.9455	#N/A	40.08+/-0.07	0	1008.58	2	505.295	#N/A	40.05	821456	220059	601397	7936	6647	1289	#N/A	0.001324	VACV			FALSE
20221010_MS_zenoSWATH_DC24_VACV_49C_r3.wiff	49C_r3	SIFRFLNI	8	C49H76N12O11	SIFRFLNI	SIFRFLNI	SIFRFLNI	SIFRFLNI	0.8497	0.9149	#N/A	40.08+/-0.07	0	1008.58	2	505.295	#N/A	40.05	322402	84594	237808	543	543	0	#N/A	0.00073	VACV			FALSE
20221010_MS_zenoSWATH_DC24_VACV_53C_r1.wiff	53C_r1	SIFRFLNI	8	C49H76N12O11	SIFRFLNI	SIFRFLNI	SIFRFLNI	SIFRFLNI	0.9496	0.9876	#N/A	40.08+/-0.07	0	1008.58	2	505.295	#N/A	40.05	2110027	665432	1444595	41449	18057	23391	#N/A	0.003973	VACV			FALSE
20221010_MS_zenoSWATH_DC24_VACV_53C_r2.wiff	53C_r2	SIFRFLNI	8	C49H76N12O11	SIFRFLNI	SIFRFLNI	SIFRFLNI	SIFRFLNI	0.5548	0.9572	#N/A	40.08+/-0.07	0	1008.58	2	505.295	#N/A	40.05	74028	12057	61971	26	26	0	#N/A	0.000178	VACV			FALSE
20221010_MS_zenoSWATH_DC24_VACV_53C_r3.wiff	53C_r3	SIFRFLNI	8	C49H76N12O11	SIFRFLNI	SIFRFLNI	SIFRFLNI	SIFRFLNI	0.847	0.9834	#N/A	40.08+/-0.07	0	1008.58	2	505.295	#N/A	40.05	214616	60557	154059	751	751	0	#N/A	0.000734	VACV			FALSE
20221010_MS_zenoSWATH_DC24_VACV_57C_r1.wiff	57C_r1	SIFRFLNI	8	C49H76N12O11	SIFRFLNI	SIFRFLNI	SIFRFLNI	SIFRFLNI	0.9721	0.7909	#N/A	40.08+/-0.07	0	1008.58	2	505.295	#N/A	40.05	394256	154076	240180	2750	2750	0	#N/A	0.001553	VACV			FALSE
20221010_MS_zenoSWATH_DC24_VACV_57C_r2.wiff	57C_r2	SIFRFLNI	8	C49H76N12O11	SIFRFLNI	SIFRFLNI	SIFRFLNI	SIFRFLNI	0.9589	0.7636	#N/A	40.08+/-0.07	0	1008.58	2	505.295	#N/A	40.05	156054	64824	91230	4756	4756	0	#N/A	0.000844	VACV			FALSE
20221010_MS_zenoSWATH_DC24_VACV_57C_r3.wiff	57C_r3	SIFRFLNI	8	C49H76N12O11	SIFRFLNI	SIFRFLNI	SIFRFLNI	SIFRFLNI	0.9349	0.6893	#N/A	40.08+/-0.07	0	1008.58	2	505.295	#N/A	40.05	167159	78787	88372	3594	3594	0	#N/A	0.000688	VACV			FALSE
20221010_MS_zenoSWATH_DC24_VACV_61C_r1.wiff	61C_r1	SIFRFLNI	8	C49H76N12O11	SIFRFLNI	SIFRFLNI	SIFRFLNI	SIFRFLNI	0.9372	0.5283	#N/A	40.08+/-0.07	0.0005	1008.58	2	505.295	#N/A	40.05	117121	86900	30222	1834	1834	0	#N/A	0.000296	VACV			FALSE
20221010_MS_zenoSWATH_DC24_VACV_61C_r2.wiff	61C_r2	SIFRFLNI	8	C49H76N12O11	SIFRFLNI	SIFRFLNI	SIFRFLNI	SIFRFLNI	0.9243	0.5416	#N/A	40.08+/-0.07	0.0002	1008.58	2	505.295	#N/A	40.05	71622	51601	20020	504	504	0	#N/A	0.000214	VACV			FALSE
20221010_MS_zenoSWATH_DC24_VACV_61C_r3.wiff	61C_r3	SIFRFLNI	8	C49H76N12O11	SIFRFLNI	SIFRFLNI	SIFRFLNI	SIFRFLNI	0.8551	0.5477	#N/A	40.08+/-0.07	0.0012	1008.58	2	505.295	#N/A	40.05	58093	40978	17115	1535	1535	0	#N/A	0.000196	VACV			FALSE
20221010_MS_zenoSWATH_DC24_VACV_65C_r1.wiff	65C_r1	SIFRFLNI	8	C49H76N12O11	SIFRFLNI	SIFRFLNI	SIFRFLNI	SIFRFLNI	0.8613	0.4292	#N/A	40.08+/-0.07	0.0006	1008.58	2	505.295	#N/A	40.05	62371	56238	6133	37093	37093	0	#N/A	0.000204	VACV			FALSE
20221010_MS_zenoSWATH_DC24_VACV_65C_r2.wiff	65C_r2	SIFRFLNI	8	C49H76N12O11	SIFRFLNI	SIFRFLNI	SIFRFLNI	SIFRFLNI	0.8626	0.5972	#N/A	40.08+/-0.07	0.0936	1008.58	2	505.295	#N/A	40.05	10261	8392	1869	7554	7554	0	#N/A	7e-05	VACV			FALSE
20221010_MS_zenoSWATH_DC24_VACV_65C_r3.wiff	65C_r3	SIFRFLNI	8	C49H76N12O11	SIFRFLNI	SIFRFLNI	SIFRFLNI	SIFRFLNI	0.8372	0.5509	#N/A	40.08+/-0.07	0.0194	1008.58	2	505.295	#N/A	40.05	36126	31134	4992	9898	9898	0	#N/A	0.000113	VACV			FALSE
20221010_MS_zenoSWATH_DC24_VACV_69C_r1.wiff	69C_r1	SIFRFLNI	8	C49H76N12O11	SIFRFLNI	SIFRFLNI	SIFRFLNI	SIFRFLNI	0.8843	0.5997	#N/A	40.08+/-0.07	0.0085	1008.58	2	505.295	#N/A	40.05	33681	24955	8726	2769	2769	0	#N/A	0.000133	VACV			FALSE
20221010_MS_zenoSWATH_DC24_VACV_69C_r2.wiff	69C_r2	SIFRFLNI	8	C49H76N12O11	SIFRFLNI	SIFRFLNI	SIFRFLNI	SIFRFLNI	0.8557	0.6483	#N/A	40.08+/-0.07	0	1008.58	2	505.295	#N/A	40.05	47540	32077	15462	6075	6075	0	#N/A	0.000178	VACV			FALSE
20221010_MS_zenoSWATH_DC24_VACV_69C_r3.wiff	69C_r3	SIFRFLNI	8	C49H76N12O11	SIFRFLNI	SIFRFLNI	SIFRFLNI	SIFRFLNI	0.7245	0.5959	#N/A	40.08+/-0.07	0.2256	1008.58	2	505.295	#N/A	40.05	15187	11537	3650	3086	3086	0	#N/A	0.000131	VACV			FALSE
20221010_MS_zenoSWATH_DC24_VACV_73C_r1.wiff	73C_r1	SIFRFLNI	8	C49H76N12O11	SIFRFLNI	SIFRFLNI	SIFRFLNI	SIFRFLNI	0.8707	0.5679	#N/A	40.08+/-0.07	0.0016	1008.58	2	505.295	#N/A	40.05	26532	20101	6431	1512	1512	0	#N/A	0.000163	VACV			FALSE
20221010_MS_zenoSWATH_DC24_VACV_73C_r2.wiff	73C_r2	SIFRFLNI	8	C49H76N12O11	SIFRFLNI	SIFRFLNI	SIFRFLNI	SIFRFLNI	0.8645	0.6792	#N/A	40.08+/-0.07	0.0015	1008.58	2	505.295	#N/A	40.05	23448	13532	9916	0	0	0	#N/A	0.00019	VACV			FALSE
20221010_MS_zenoSWATH_DC24_VACV_73C_r3.wiff	73C_r3	SIFRFLNI	8	C49H76N12O11	SIFRFLNI	SIFRFLNI	SIFRFLNI	SIFRFLNI	0.9156	0.7009	#N/A	40.08+/-0.07	0	1008.58	2	505.295	#N/A	40.05	62775	36938	25838	356	356	0	#N/A	0.000232	VACV			FALSE
20221010_MS_zenoSWATH_DC24_VACV_37C_r1.wiff	37C_r1	IGMFNLTFI	9	C51H78N10O13S	IGM[+16]FNLTFI	IGM(unimod:35)FNLTFI	IGM[Oxi]FNLTFI	IGM[Oxidation (M)]FNLTFI	0.9607	0.9987	#N/A	43.43+/-0.92	0	1070.55	2	536.281	#N/A	43.49	2007625	954328	1053297	8865	7808	1057	#N/A	0.002133	VACV			FALSE
20221010_MS_zenoSWATH_DC24_VACV_37C_r2.wiff	37C_r2	IGMFNLTFI	9	C51H78N10O13S	IGM[+16]FNLTFI	IGM(unimod:35)FNLTFI	IGM[Oxi]FNLTFI	IGM[Oxidation (M)]FNLTFI	0.9661	0.9949	#N/A	43.43+/-0.92	0	1070.55	2	536.281	#N/A	43.49	774564	370066	404499	579	579	0	#N/A	0.001216	VACV			FALSE
20221010_MS_zenoSWATH_DC24_VACV_37C_r3.wiff	37C_r3	IGMFNLTFI	9	C51H78N10O13S	IGM[+16]FNLTFI	IGM(unimod:35)FNLTFI	IGM[Oxi]FNLTFI	IGM[Oxidation (M)]FNLTFI	0.9588	0.9964	#N/A	43.43+/-0.92	0	1070.55	2	536.281	#N/A	43.49	1994207	946017	1048190	7286	5562	1724	#N/A	0.002609	VACV			FALSE
20221010_MS_zenoSWATH_DC24_VACV_41C_r1.wiff	41C_r1	IGMFNLTFI	9	C51H78N10O13S	IGM[+16]FNLTFI	IGM(unimod:35)FNLTFI	IGM[Oxi]FNLTFI	IGM[Oxidation (M)]FNLTFI	0.9776	0.9964	#N/A	43.43+/-0.92	0	1070.55	2	536.281	#N/A	43.49	735600	340765	394835	0	0	0	#N/A	0.000897	VACV			FALSE
20221010_MS_zenoSWATH_DC24_VACV_41C_r2.wiff	41C_r2	IGMFNLTFI	9	C51H78N10O13S	IGM[+16]FNLTFI	IGM(unimod:35)FNLTFI	IGM[Oxi]FNLTFI	IGM[Oxidation (M)]FNLTFI	0.9665	0.9967	#N/A	43.43+/-0.92	0	1070.55	2	536.281	#N/A	43.49	1138391	550537	587854	6349	6349	0	#N/A	0.001632	VACV			FALSE
20221010_MS_zenoSWATH_DC24_VACV_41C_r3.wiff	41C_r3	IGMFNLTFI	9	C51H78N10O13S	IGM[+16]FNLTFI	IGM(unimod:35)FNLTFI	IGM[Oxi]FNLTFI	IGM[Oxidation (M)]FNLTFI	0.9625	0.9964	#N/A	43.43+/-0.92	0	1070.55	2	536.281	#N/A	43.49	1332650	653531	679119	4729	4729	0	#N/A	0.001881	VACV			FALSE
20221010_MS_zenoSWATH_DC24_VACV_45C_r1.wiff	45C_r1	IGMFNLTFI	9	C51H78N10O13S	IGM[+16]FNLTFI	IGM(unimod:35)FNLTFI	IGM[Oxi]FNLTFI	IGM[Oxidation (M)]FNLTFI	0.9717	0.9985	#N/A	43.43+/-0.92	0	1070.55	2	536.281	#N/A	43.49	2038609	972261	1066348	8157	6216	1941	#N/A	0.00223	VACV			FALSE
20221010_MS_zenoSWATH_DC24_VACV_45C_r2.wiff	45C_r2	IGMFNLTFI	9	C51H78N10O13S	IGM[+16]FNLTFI	IGM(unimod:35)FNLTFI	IGM[Oxi]FNLTFI	IGM[Oxidation (M)]FNLTFI	0.9595	0.9962	#N/A	43.43+/-0.92	0	1070.55	2	536.281	#N/A	43.49	1014889	486481	528407	1085	1085	0	#N/A	0.001761	VACV			FALSE
20221010_MS_zenoSWATH_DC24_VACV_45C_r3.wiff	45C_r3	IGMFNLTFI	9	C51H78N10O13S	IGM[+16]FNLTFI	IGM(unimod:35)FNLTFI	IGM[Oxi]FNLTFI	IGM[Oxidation (M)]FNLTFI	0.965	0.9963	#N/A	43.43+/-0.92	0	1070.55	2	536.281	#N/A	43.49	1738265	831621	906644	12756	10417	2338	#N/A	0.002004	VACV			FALSE
20221010_MS_zenoSWATH_DC24_VACV_49C_r1.wiff	49C_r1	IGMFNLTFI	9	C51H78N10O13S	IGM[+16]FNLTFI	IGM(unimod:35)FNLTFI	IGM[Oxi]FNLTFI	IGM[Oxidation (M)]FNLTFI	0.9703	0.9986	#N/A	43.43+/-0.92	0	1070.55	2	536.281	#N/A	43.49	953923	455999	497925	4721	2842	1879	#N/A	0.002007	VACV			FALSE
20221010_MS_zenoSWATH_DC24_VACV_49C_r2.wiff	49C_r2	IGMFNLTFI	9	C51H78N10O13S	IGM[+16]FNLTFI	IGM(unimod:35)FNLTFI	IGM[Oxi]FNLTFI	IGM[Oxidation (M)]FNLTFI	0.9691	0.9955	#N/A	43.43+/-0.92	0	1070.55	2	536.281	#N/A	43.49	1270448	623748	646701	5654	5654	0	#N/A	0.002047	VACV			FALSE
20221010_MS_zenoSWATH_DC24_VACV_49C_r3.wiff	49C_r3	IGMFNLTFI	9	C51H78N10O13S	IGM[+16]FNLTFI	IGM(unimod:35)FNLTFI	IGM[Oxi]FNLTFI	IGM[Oxidation (M)]FNLTFI	0.9643	0.9982	#N/A	43.43+/-0.92	0	1070.55	2	536.281	#N/A	43.49	820516	390844	429672	1424	1424	0	#N/A	0.001858	VACV			FALSE
20221010_MS_zenoSWATH_DC24_VACV_53C_r1.wiff	53C_r1	IGMFNLTFI	9	C51H78N10O13S	IGM[+16]FNLTFI	IGM(unimod:35)FNLTFI	IGM[Oxi]FNLTFI	IGM[Oxidation (M)]FNLTFI	0.9753	0.9909	#N/A	43.43+/-0.92	0	1070.55	2	536.281	#N/A	43.49	687711	332538	355173	142	142	0	#N/A	0.001295	VACV			FALSE
20221010_MS_zenoSWATH_DC24_VACV_53C_r2.wiff	53C_r2	IGMFNLTFI	9	C51H78N10O13S	IGM[+16]FNLTFI	IGM(unimod:35)FNLTFI	IGM[Oxi]FNLTFI	IGM[Oxidation (M)]FNLTFI	0.9631	0.9929	#N/A	43.43+/-0.92	0	1070.55	2	536.281	#N/A	43.49	400850	195264	205586	1320	1320	0	#N/A	0.000962	VACV			FALSE
20221010_MS_zenoSWATH_DC24_VACV_53C_r3.wiff	53C_r3	IGMFNLTFI	9	C51H78N10O13S	IGM[+16]FNLTFI	IGM(unimod:35)FNLTFI	IGM[Oxi]FNLTFI	IGM[Oxidation (M)]FNLTFI	0.9576	0.998	#N/A	43.43+/-0.92	0	1070.55	2	536.281	#N/A	43.49	474896	228601	246295	0	0	0	#N/A	0.001624	VACV			FALSE
20221010_MS_zenoSWATH_DC24_VACV_57C_r1.wiff	57C_r1	IGMFNLTFI	9	C51H78N10O13S	IGM[+16]FNLTFI	IGM(unimod:35)FNLTFI	IGM[Oxi]FNLTFI	IGM[Oxidation (M)]FNLTFI	0.9716	0.9736	#N/A	43.43+/-0.92	0	1070.55	2	536.281	#N/A	43.49	23058	11588	11470	0	0	0	#N/A	9.1e-05	VACV			FALSE
20221010_MS_zenoSWATH_DC24_VACV_57C_r2.wiff	57C_r2	IGMFNLTFI	9	C51H78N10O13S	IGM[+16]FNLTFI	IGM(unimod:35)FNLTFI	IGM[Oxi]FNLTFI	IGM[Oxidation (M)]FNLTFI	0.8389	0.9762	#N/A	43.43+/-0.92	0.0395	1070.55	2	536.281	#N/A	43.49	9243	5903	3340	0	0	0	#N/A	5e-05	VACV			FALSE
20221010_MS_zenoSWATH_DC24_VACV_57C_r3.wiff	57C_r3	IGMFNLTFI	9	C51H78N10O13S	IGM[+16]FNLTFI	IGM(unimod:35)FNLTFI	IGM[Oxi]FNLTFI	IGM[Oxidation (M)]FNLTFI	0.8809	0.9167	#N/A	43.43+/-0.92	0.0093	1070.55	2	536.281	#N/A	43.49	15884	8819	7066	1122	1122	0	#N/A	6.5e-05	VACV			FALSE
20221010_MS_zenoSWATH_DC24_VACV_61C_r1.wiff	61C_r1	IGMFNLTFI	9	C51H78N10O13S	IGM[+16]FNLTFI	IGM(unimod:35)FNLTFI	IGM[Oxi]FNLTFI	IGM[Oxidation (M)]FNLTFI	0.813	0.8659	#N/A	43.43+/-0.92	0.0839	1070.55	2	536.281	#N/A	43.49	8250	6136	2114	0	0	0	#N/A	2.1e-05	VACV			FALSE
20221010_MS_zenoSWATH_DC24_VACV_61C_r2.wiff	61C_r2	IGMFNLTFI	9	C51H78N10O13S	IGM[+16]FNLTFI	IGM(unimod:35)FNLTFI	IGM[Oxi]FNLTFI	IGM[Oxidation (M)]FNLTFI	0.712	0.8067	#N/A	43.43+/-0.92	0.0833	1070.55	2	536.281	#N/A	43.49	3969	3142	827	611	228	384	#N/A	1.2e-05	VACV			FALSE
20221010_MS_zenoSWATH_DC24_VACV_61C_r3.wiff	61C_r3	IGMFNLTFI	9	C51H78N10O13S	IGM[+16]FNLTFI	IGM(unimod:35)FNLTFI	IGM[Oxi]FNLTFI	IGM[Oxidation (M)]FNLTFI	0.5797	0.8073	#N/A	43.43+/-0.92	0.1363	1070.55	2	536.281	#N/A	43.49	2382	2048	334	92	92	0	#N/A	8e-06	VACV			FALSE
20221010_MS_zenoSWATH_DC24_VACV_65C_r1.wiff	65C_r1	IGMFNLTFI	9	C51H78N10O13S	IGM[+16]FNLTFI	IGM(unimod:35)FNLTFI	IGM[Oxi]FNLTFI	IGM[Oxidation (M)]FNLTFI	0.849	0.9184	#N/A	43.43+/-0.92	0.0004	1070.55	2	536.281	#N/A	43.49	6679	5305	1374	0	0	0	#N/A	2.2e-05	VACV			FALSE
20221010_MS_zenoSWATH_DC24_VACV_65C_r2.wiff	65C_r2	IGMFNLTFI	9	C51H78N10O13S	IGM[+16]FNLTFI	IGM(unimod:35)FNLTFI	IGM[Oxi]FNLTFI	IGM[Oxidation (M)]FNLTFI	0.633	0.6927	#N/A	43.43+/-0.92	0.098	1070.55	2	536.281	#N/A	43.49	1038	440	598	71	71	0	#N/A	7e-06	VACV			FALSE
20221010_MS_zenoSWATH_DC24_VACV_65C_r3.wiff	65C_r3	IGMFNLTFI	9	C51H78N10O13S	IGM[+16]FNLTFI	IGM(unimod:35)FNLTFI	IGM[Oxi]FNLTFI	IGM[Oxidation (M)]FNLTFI	0.7206	0.9958	#N/A	43.43+/-0.92	0.0014	1070.55	2	536.281	#N/A	43.49	6228	4454	1774	0	0	0	#N/A	1.9e-05	VACV			FALSE
20221010_MS_zenoSWATH_DC24_VACV_69C_r1.wiff	69C_r1	IGMFNLTFI	9	C51H78N10O13S	IGM[+16]FNLTFI	IGM(unimod:35)FNLTFI	IGM[Oxi]FNLTFI	IGM[Oxidation (M)]FNLTFI	0.5766	0.848	#N/A	43.43+/-0.92	0.0191	1070.55	2	536.281	#N/A	43.49	1891	575	1316	574	574	0	#N/A	7e-06	VACV			FALSE
20221010_MS_zenoSWATH_DC24_VACV_69C_r2.wiff	69C_r2	IGMFNLTFI	9	C51H78N10O13S	IGM[+16]FNLTFI	IGM(unimod:35)FNLTFI	IGM[Oxi]FNLTFI	IGM[Oxidation (M)]FNLTFI	0.8463	0.8766	#N/A	43.43+/-0.92	0.035	1070.55	2	536.281	#N/A	43.49	4995	3756	1239	1468	1468	0	#N/A	1.9e-05	VACV			FALSE
20221010_MS_zenoSWATH_DC24_VACV_69C_r3.wiff	69C_r3	IGMFNLTFI	9	C51H78N10O13S	IGM[+16]FNLTFI	IGM(unimod:35)FNLTFI	IGM[Oxi]FNLTFI	IGM[Oxidation (M)]FNLTFI	0.4877	0.847	#N/A	43.43+/-0.92	0.2218	1070.55	2	536.281	#N/A	43.49	790	437	353	264	264	0	#N/A	7e-06	VACV			FALSE
20221010_MS_zenoSWATH_DC24_VACV_73C_r1.wiff	73C_r1	IGMFNLTFI	9	C51H78N10O13S	IGM[+16]FNLTFI	IGM(unimod:35)FNLTFI	IGM[Oxi]FNLTFI	IGM[Oxidation (M)]FNLTFI	0.4131	0.3894	#N/A	43.43+/-0.92	0.3879	1070.55	2	536.281	#N/A	43.49	1073	257	816	0	0	0	#N/A	7e-06	VACV			FALSE
20221010_MS_zenoSWATH_DC24_VACV_73C_r2.wiff	73C_r2	IGMFNLTFI	9	C51H78N10O13S	IGM[+16]FNLTFI	IGM(unimod:35)FNLTFI	IGM[Oxi]FNLTFI	IGM[Oxidation (M)]FNLTFI	0.3615	0.3894	#N/A	43.43+/-0.92	0.284	1070.55	2	536.281	#N/A	43.49	375	19	357	0	0	0	#N/A	3e-06	VACV			FALSE
20221010_MS_zenoSWATH_DC24_VACV_73C_r3.wiff	73C_r3	IGMFNLTFI	9	C51H78N10O13S	IGM[+16]FNLTFI	IGM(unimod:35)FNLTFI	IGM[Oxi]FNLTFI	IGM[Oxidation (M)]FNLTFI	0.5017	0.7211	#N/A	43.43+/-0.92	0.2571	1070.55	2	536.281	#N/A	43.49	969	265	704	0	0	0	#N/A	4e-06	VACV			FALSE
20221010_MS_zenoSWATH_DC24_VACV_37C_r1.wiff	37C_r1	VIYIFTVRL	9	C56H90N12O12	VIYIFTVRL	VIYIFTVRL	VIYIFTVRL	VIYIFTVRL	0.9025	0.9957	#N/A	40.96+/-0.02	0	1122.68	2	562.347	#N/A	40.96	834626	180870	653756	6302	622	5680	#N/A	0.000887	VACV			FALSE
20221010_MS_zenoSWATH_DC24_VACV_37C_r2.wiff	37C_r2	VIYIFTVRL	9	C56H90N12O12	VIYIFTVRL	VIYIFTVRL	VIYIFTVRL	VIYIFTVRL	0.896	0.9912	#N/A	40.96+/-0.02	0	1122.68	2	562.347	#N/A	40.96	659305	150957	508349	2635	105	2530	#N/A	0.001035	VACV			FALSE
20221010_MS_zenoSWATH_DC24_VACV_37C_r3.wiff	37C_r3	VIYIFTVRL	9	C56H90N12O12	VIYIFTVRL	VIYIFTVRL	VIYIFTVRL	VIYIFTVRL	0.9069	0.9819	#N/A	40.96+/-0.02	0	1122.68	2	562.347	#N/A	40.96	229891	45955	183936	805	805	0	#N/A	0.000301	VACV			FALSE
20221010_MS_zenoSWATH_DC24_VACV_41C_r1.wiff	41C_r1	VIYIFTVRL	9	C56H90N12O12	VIYIFTVRL	VIYIFTVRL	VIYIFTVRL	VIYIFTVRL	0.9061	0.9963	#N/A	40.96+/-0.02	0	1122.68	2	562.347	#N/A	40.96	303018	65659	237359	1495	1495	0	#N/A	0.000369	VACV			FALSE
20221010_MS_zenoSWATH_DC24_VACV_41C_r2.wiff	41C_r2	VIYIFTVRL	9	C56H90N12O12	VIYIFTVRL	VIYIFTVRL	VIYIFTVRL	VIYIFTVRL	0.9034	0.9901	#N/A	40.96+/-0.02	0	1122.68	2	562.347	#N/A	40.96	430218	85017	345201	1171	1171	0	#N/A	0.000617	VACV			FALSE
20221010_MS_zenoSWATH_DC24_VACV_41C_r3.wiff	41C_r3	VIYIFTVRL	9	C56H90N12O12	VIYIFTVRL	VIYIFTVRL	VIYIFTVRL	VIYIFTVRL	0.9025	0.9954	#N/A	40.96+/-0.02	0	1122.68	2	562.347	#N/A	40.96	556150	114535	441615	4722	2762	1960	#N/A	0.000785	VACV			FALSE
20221010_MS_zenoSWATH_DC24_VACV_45C_r1.wiff	45C_r1	VIYIFTVRL	9	C56H90N12O12	VIYIFTVRL	VIYIFTVRL	VIYIFTVRL	VIYIFTVRL	0.8944	0.9966	#N/A	40.96+/-0.02	0	1122.68	2	562.347	#N/A	40.96	1888897	418961	1469937	4586	2475	2111	#N/A	0.002066	VACV			FALSE
20221010_MS_zenoSWATH_DC24_VACV_45C_r2.wiff	45C_r2	VIYIFTVRL	9	C56H90N12O12	VIYIFTVRL	VIYIFTVRL	VIYIFTVRL	VIYIFTVRL	0.8978	0.9933	#N/A	40.96+/-0.02	0	1122.68	2	562.347	#N/A	40.96	654549	134680	519870	2840	1138	1702	#N/A	0.001136	VACV			FALSE
20221010_MS_zenoSWATH_DC24_VACV_45C_r3.wiff	45C_r3	VIYIFTVRL	9	C56H90N12O12	VIYIFTVRL	VIYIFTVRL	VIYIFTVRL	VIYIFTVRL	0.904	0.9893	#N/A	40.96+/-0.02	0	1122.68	2	562.347	#N/A	40.96	1438791	318351	1120439	2218	736	1482	#N/A	0.001659	VACV			FALSE
20221010_MS_zenoSWATH_DC24_VACV_49C_r1.wiff	49C_r1	VIYIFTVRL	9	C56H90N12O12	VIYIFTVRL	VIYIFTVRL	VIYIFTVRL	VIYIFTVRL	0.8973	0.9964	#N/A	40.96+/-0.02	0	1122.68	2	562.347	#N/A	40.96	1254748	274213	980534	19318	7855	11463	#N/A	0.00264	VACV			FALSE
20221010_MS_zenoSWATH_DC24_VACV_49C_r2.wiff	49C_r2	VIYIFTVRL	9	C56H90N12O12	VIYIFTVRL	VIYIFTVRL	VIYIFTVRL	VIYIFTVRL	0.9001	0.9926	#N/A	40.96+/-0.02	0	1122.68	2	562.347	#N/A	40.96	723402	151741	571661	3030	194	2836	#N/A	0.001166	VACV			FALSE
20221010_MS_zenoSWATH_DC24_VACV_49C_r3.wiff	49C_r3	VIYIFTVRL	9	C56H90N12O12	VIYIFTVRL	VIYIFTVRL	VIYIFTVRL	VIYIFTVRL	0.918	0.9953	#N/A	40.96+/-0.02	0	1122.68	2	562.347	#N/A	40.96	173155	34327	138829	227	227	0	#N/A	0.000392	VACV			FALSE
20221010_MS_zenoSWATH_DC24_VACV_53C_r1.wiff	53C_r1	VIYIFTVRL	9	C56H90N12O12	VIYIFTVRL	VIYIFTVRL	VIYIFTVRL	VIYIFTVRL	0.8953	0.9959	#N/A	40.96+/-0.02	0	1122.68	2	562.347	#N/A	40.96	1648645	378480	1270166	10221	3063	7158	#N/A	0.003104	VACV			FALSE
20221010_MS_zenoSWATH_DC24_VACV_53C_r2.wiff	53C_r2	VIYIFTVRL	9	C56H90N12O12	VIYIFTVRL	VIYIFTVRL	VIYIFTVRL	VIYIFTVRL	0.8796	0.9718	#N/A	40.96+/-0.02	0	1122.68	2	562.347	#N/A	40.96	63959	14145	49814	0	0	0	#N/A	0.000153	VACV			FALSE
20221010_MS_zenoSWATH_DC24_VACV_53C_r3.wiff	53C_r3	VIYIFTVRL	9	C56H90N12O12	VIYIFTVRL	VIYIFTVRL	VIYIFTVRL	VIYIFTVRL	0.8946	0.9786	#N/A	40.96+/-0.02	0	1122.68	2	562.347	#N/A	40.96	153825	33229	120596	338	338	0	#N/A	0.000526	VACV			FALSE
20221010_MS_zenoSWATH_DC24_VACV_57C_r1.wiff	57C_r1	VIYIFTVRL	9	C56H90N12O12	VIYIFTVRL	VIYIFTVRL	VIYIFTVRL	VIYIFTVRL	0.8907	0.9972	#N/A	40.96+/-0.02	0	1122.68	2	562.347	#N/A	40.96	1577774	357415	1220358	10494	4111	6384	#N/A	0.006213	VACV			FALSE
20221010_MS_zenoSWATH_DC24_VACV_57C_r2.wiff	57C_r2	VIYIFTVRL	9	C56H90N12O12	VIYIFTVRL	VIYIFTVRL	VIYIFTVRL	VIYIFTVRL	0.8978	0.9953	#N/A	40.96+/-0.02	0	1122.68	2	562.347	#N/A	40.96	1351169	292142	1059027	13092	2831	10261	#N/A	0.007304	VACV			FALSE
20221010_MS_zenoSWATH_DC24_VACV_57C_r3.wiff	57C_r3	VIYIFTVRL	9	C56H90N12O12	VIYIFTVRL	VIYIFTVRL	VIYIFTVRL	VIYIFTVRL	0.889	0.9942	#N/A	40.96+/-0.02	0	1122.68	2	562.347	#N/A	40.96	1385203	308645	1076557	25331	5709	19622	#N/A	0.005699	VACV			FALSE
20221010_MS_zenoSWATH_DC24_VACV_61C_r1.wiff	61C_r1	VIYIFTVRL	9	C56H90N12O12	VIYIFTVRL	VIYIFTVRL	VIYIFTVRL	VIYIFTVRL	0.9011	0.996	#N/A	40.96+/-0.02	0	1122.68	2	562.347	#N/A	40.96	902532	196049	706483	15093	6584	8509	#N/A	0.002284	VACV			FALSE
20221010_MS_zenoSWATH_DC24_VACV_61C_r2.wiff	61C_r2	VIYIFTVRL	9	C56H90N12O12	VIYIFTVRL	VIYIFTVRL	VIYIFTVRL	VIYIFTVRL	0.8948	0.9916	#N/A	40.96+/-0.02	0	1122.68	2	562.347	#N/A	40.96	902399	192497	709902	4717	324	4392	#N/A	0.002696	VACV			FALSE
20221010_MS_zenoSWATH_DC24_VACV_61C_r3.wiff	61C_r3	VIYIFTVRL	9	C56H90N12O12	VIYIFTVRL	VIYIFTVRL	VIYIFTVRL	VIYIFTVRL	0.8956	0.9888	#N/A	40.96+/-0.02	0	1122.68	2	562.347	#N/A	40.96	1043208	223790	819418	18615	7798	10817	#N/A	0.003522	VACV			FALSE
20221010_MS_zenoSWATH_DC24_VACV_65C_r1.wiff	65C_r1	VIYIFTVRL	9	C56H90N12O12	VIYIFTVRL	VIYIFTVRL	VIYIFTVRL	VIYIFTVRL	0.8966	0.9966	#N/A	40.96+/-0.02	0	1122.68	2	562.347	#N/A	40.96	5550342	1298051	4252290	59851	20621	39230	#N/A	0.018123	VACV			FALSE
20221010_MS_zenoSWATH_DC24_VACV_65C_r2.wiff	65C_r2	VIYIFTVRL	9	C56H90N12O12	VIYIFTVRL	VIYIFTVRL	VIYIFTVRL	VIYIFTVRL	0.9003	0.9941	#N/A	40.96+/-0.02	0	1122.68	2	562.347	#N/A	40.96	1368500	301066	1067434	32811	8479	24331	#N/A	0.009368	VACV			FALSE
20221010_MS_zenoSWATH_DC24_VACV_65C_r3.wiff	65C_r3	VIYIFTVRL	9	C56H90N12O12	VIYIFTVRL	VIYIFTVRL	VIYIFTVRL	VIYIFTVRL	0.8974	0.9957	#N/A	40.96+/-0.02	0	1122.68	2	562.347	#N/A	40.96	5158081	1186763	3971317	101928	24387	77542	#N/A	0.016138	VACV			FALSE
20221010_MS_zenoSWATH_DC24_VACV_69C_r1.wiff	69C_r1	VIYIFTVRL	9	C56H90N12O12	VIYIFTVRL	VIYIFTVRL	VIYIFTVRL	VIYIFTVRL	0.8937	0.997	#N/A	40.96+/-0.02	0	1122.68	2	562.347	#N/A	40.96	7232563	1711880	5520683	157473	36483	120990	#N/A	0.028573	VACV			FALSE
20221010_MS_zenoSWATH_DC24_VACV_69C_r2.wiff	69C_r2	VIYIFTVRL	9	C56H90N12O12	VIYIFTVRL	VIYIFTVRL	VIYIFTVRL	VIYIFTVRL	0.8903	0.9959	#N/A	40.96+/-0.02	0	1122.68	2	562.347	#N/A	40.96	6823370	1556513	5266857	28816	9672	19144	#N/A	0.025543	VACV			FALSE
20221010_MS_zenoSWATH_DC24_VACV_69C_r3.wiff	69C_r3	VIYIFTVRL	9	C56H90N12O12	VIYIFTVRL	VIYIFTVRL	VIYIFTVRL	VIYIFTVRL	0.8951	0.9982	#N/A	40.96+/-0.02	0	1122.68	2	562.347	#N/A	40.96	3713147	843682	2869465	47633	10090	37543	#N/A	0.032089	VACV			FALSE
20221010_MS_zenoSWATH_DC24_VACV_73C_r1.wiff	73C_r1	VIYIFTVRL	9	C56H90N12O12	VIYIFTVRL	VIYIFTVRL	VIYIFTVRL	VIYIFTVRL	0.8921	0.996	#N/A	40.96+/-0.02	0	1122.68	2	562.347	#N/A	40.96	5216177	1203225	4012951	49856	9126	40730	#N/A	0.0321	VACV			FALSE
20221010_MS_zenoSWATH_DC24_VACV_73C_r2.wiff	73C_r2	VIYIFTVRL	9	C56H90N12O12	VIYIFTVRL	VIYIFTVRL	VIYIFTVRL	VIYIFTVRL	0.8942	0.9964	#N/A	40.96+/-0.02	0	1122.68	2	562.347	#N/A	40.96	5064532	1211042	3853490	27646	6466	21180	#N/A	0.040975	VACV			FALSE
20221010_MS_zenoSWATH_DC24_VACV_73C_r3.wiff	73C_r3	VIYIFTVRL	9	C56H90N12O12	VIYIFTVRL	VIYIFTVRL	VIYIFTVRL	VIYIFTVRL	0.8951	0.9975	#N/A	40.96+/-0.02	0	1122.68	2	562.347	#N/A	40.96	11486122	2799649	8686474	90554	23358	67197	#N/A	0.042473	VACV			FALSE
20221010_MS_zenoSWATH_DC24_VACV_37C_r1.wiff	37C_r1	SSYTNQTLS	9	C41H65N11O18	SSYTNQTLS	SSYTNQTLS	SSYTNQTLS	SSYTNQTLS	0.3921	0.6754	#N/A	31.19+/-2.22	0.2712	999.451	2	500.733	#N/A	31.93	639	239	400	0	0	0	#N/A	1e-06	VACV			FALSE
20221010_MS_zenoSWATH_DC24_VACV_37C_r2.wiff	37C_r2	SSYTNQTLS	9	C41H65N11O18	SSYTNQTLS	SSYTNQTLS	SSYTNQTLS	SSYTNQTLS	0.3454	0.433	#N/A	31.19+/-2.22	0.3837	999.451	2	500.733	#N/A	31.93	313	76	237	0	0	0	#N/A	0	VACV			FALSE
20221010_MS_zenoSWATH_DC24_VACV_37C_r3.wiff	37C_r3	SSYTNQTLS	9	C41H65N11O18	SSYTNQTLS	SSYTNQTLS	SSYTNQTLS	SSYTNQTLS	0.377	0.5637	#N/A	31.19+/-2.22	0.3596	999.451	2	500.733	#N/A	31.93	1823	31	1792	54	54	0	#N/A	2e-06	VACV			FALSE
20221010_MS_zenoSWATH_DC24_VACV_41C_r1.wiff	41C_r1	SSYTNQTLS	9	C41H65N11O18	SSYTNQTLS	SSYTNQTLS	SSYTNQTLS	SSYTNQTLS	0.6268	0.5637	#N/A	31.19+/-2.22	0.1748	999.451	2	500.733	#N/A	31.93	1037	44	992	21	21	0	#N/A	1e-06	VACV			FALSE
20221010_MS_zenoSWATH_DC24_VACV_41C_r2.wiff	41C_r2	SSYTNQTLS	9	C41H65N11O18	SSYTNQTLS	SSYTNQTLS	SSYTNQTLS	SSYTNQTLS	0.2782	0	#N/A	31.19+/-2.22	0.2883	999.451	2	500.733	#N/A	31.93	495	0	495	0	0	0	#N/A	1e-06	VACV			FALSE
20221010_MS_zenoSWATH_DC24_VACV_41C_r3.wiff	41C_r3	SSYTNQTLS	9	C41H65N11O18	SSYTNQTLS	SSYTNQTLS	SSYTNQTLS	SSYTNQTLS	0.518	0.6527	#N/A	31.19+/-2.22	0.3128	999.451	2	500.733	#N/A	31.93	914	184	730	0	0	0	#N/A	1e-06	VACV			FALSE
20221010_MS_zenoSWATH_DC24_VACV_45C_r1.wiff	45C_r1	SSYTNQTLS	9	C41H65N11O18	SSYTNQTLS	SSYTNQTLS	SSYTNQTLS	SSYTNQTLS	0.3798	0.4544	#N/A	31.19+/-2.22	0.2333	999.451	2	500.733	#N/A	31.93	613	260	352	0	0	0	#N/A	1e-06	VACV			FALSE
20221010_MS_zenoSWATH_DC24_VACV_45C_r2.wiff	45C_r2	SSYTNQTLS	9	C41H65N11O18	SSYTNQTLS	SSYTNQTLS	SSYTNQTLS	SSYTNQTLS	0.3527	0.588	#N/A	31.19+/-2.22	0.2649	999.451	2	500.733	#N/A	31.93	2792	159	2633	0	0	0	#N/A	5e-06	VACV			FALSE
20221010_MS_zenoSWATH_DC24_VACV_45C_r3.wiff	45C_r3	SSYTNQTLS	9	C41H65N11O18	SSYTNQTLS	SSYTNQTLS	SSYTNQTLS	SSYTNQTLS	0.5944	0.6451	#N/A	31.19+/-2.22	0.249	999.451	2	500.733	#N/A	31.93	3082	316	2766	0	0	0	#N/A	4e-06	VACV			FALSE
20221010_MS_zenoSWATH_DC24_VACV_49C_r1.wiff	49C_r1	SSYTNQTLS	9	C41H65N11O18	SSYTNQTLS	SSYTNQTLS	SSYTNQTLS	SSYTNQTLS	0.3389	0.7729	#N/A	31.19+/-2.22	0.376	999.451	2	500.733	#N/A	31.93	1801	300	1501	121	0	121	#N/A	4e-06	VACV			FALSE
20221010_MS_zenoSWATH_DC24_VACV_49C_r2.wiff	49C_r2	SSYTNQTLS	9	C41H65N11O18	SSYTNQTLS	SSYTNQTLS	SSYTNQTLS	SSYTNQTLS	0.4803	0.6369	#N/A	31.19+/-2.22	0.2726	999.451	2	500.733	#N/A	31.93	2143	349	1793	0	0	0	#N/A	3e-06	VACV			FALSE
20221010_MS_zenoSWATH_DC24_VACV_49C_r3.wiff	49C_r3	SSYTNQTLS	9	C41H65N11O18	SSYTNQTLS	SSYTNQTLS	SSYTNQTLS	SSYTNQTLS	0.355	0.797	#N/A	31.19+/-2.22	0.2565	999.451	2	500.733	#N/A	31.93	821	350	471	30	30	0	#N/A	2e-06	VACV			FALSE
20221010_MS_zenoSWATH_DC24_VACV_53C_r1.wiff	53C_r1	SSYTNQTLS	9	C41H65N11O18	SSYTNQTLS	SSYTNQTLS	SSYTNQTLS	SSYTNQTLS	0.2681	0.736	#N/A	31.19+/-2.22	0.3871	999.451	2	500.733	#N/A	31.93	534	273	261	0	0	0	#N/A	1e-06	VACV			FALSE
20221010_MS_zenoSWATH_DC24_VACV_53C_r2.wiff	53C_r2	SSYTNQTLS	9	C41H65N11O18	SSYTNQTLS	SSYTNQTLS	SSYTNQTLS	SSYTNQTLS	0.2754	0.4268	#N/A	31.19+/-2.22	0.2674	999.451	2	500.733	#N/A	31.93	801	346	455	0	0	0	#N/A	2e-06	VACV			FALSE
20221010_MS_zenoSWATH_DC24_VACV_53C_r3.wiff	53C_r3	SSYTNQTLS	9	C41H65N11O18	SSYTNQTLS	SSYTNQTLS	SSYTNQTLS	SSYTNQTLS	0.3045	0.7962	#N/A	31.19+/-2.22	0.3995	999.451	2	500.733	#N/A	31.93	405	143	262	17	17	0	#N/A	1e-06	VACV			FALSE
20221010_MS_zenoSWATH_DC24_VACV_57C_r1.wiff	57C_r1	SSYTNQTLS	9	C41H65N11O18	SSYTNQTLS	SSYTNQTLS	SSYTNQTLS	SSYTNQTLS	0.3121	0.5311	#N/A	31.19+/-2.22	0.2996	999.451	2	500.733	#N/A	31.93	438	150	288	0	0	0	#N/A	2e-06	VACV			FALSE
20221010_MS_zenoSWATH_DC24_VACV_57C_r2.wiff	57C_r2	SSYTNQTLS	9	C41H65N11O18	SSYTNQTLS	SSYTNQTLS	SSYTNQTLS	SSYTNQTLS	0.4289	0.7396	#N/A	31.19+/-2.22	0.1544	999.451	2	500.733	#N/A	31.93	1084	396	689	947	947	0	#N/A	6e-06	VACV			FALSE
20221010_MS_zenoSWATH_DC24_VACV_57C_r3.wiff	57C_r3	SSYTNQTLS	9	C41H65N11O18	SSYTNQTLS	SSYTNQTLS	SSYTNQTLS	SSYTNQTLS	0.2557	0.5381	#N/A	31.19+/-2.22	0.4051	999.451	2	500.733	#N/A	31.93	1917	1163	754	0	0	0	#N/A	8e-06	VACV			FALSE
20221010_MS_zenoSWATH_DC24_VACV_61C_r1.wiff	61C_r1	SSYTNQTLS	9	C41H65N11O18	SSYTNQTLS	SSYTNQTLS	SSYTNQTLS	SSYTNQTLS	0.4502	0.9358	#N/A	31.19+/-2.22	0.2837	999.451	2	500.733	#N/A	31.93	2398	1601	797	2170	2170	0	#N/A	6e-06	VACV			FALSE
20221010_MS_zenoSWATH_DC24_VACV_61C_r2.wiff	61C_r2	SSYTNQTLS	9	C41H65N11O18	SSYTNQTLS	SSYTNQTLS	SSYTNQTLS	SSYTNQTLS	0.2625	0.6532	#N/A	31.19+/-2.22	0.3307	999.451	2	500.733	#N/A	31.93	879	556	323	27	27	0	#N/A	3e-06	VACV			FALSE
20221010_MS_zenoSWATH_DC24_VACV_61C_r3.wiff	61C_r3	SSYTNQTLS	9	C41H65N11O18	SSYTNQTLS	SSYTNQTLS	SSYTNQTLS	SSYTNQTLS	0.5459	0.4339	#N/A	31.19+/-2.22	0.1367	999.451	2	500.733	#N/A	31.93	887	319	568	285	285	0	#N/A	3e-06	VACV			FALSE
20221010_MS_zenoSWATH_DC24_VACV_65C_r1.wiff	65C_r1	SSYTNQTLS	9	C41H65N11O18	SSYTNQTLS	SSYTNQTLS	SSYTNQTLS	SSYTNQTLS	0.3663	0.4124	#N/A	31.19+/-2.22	0.2679	999.451	2	500.733	#N/A	31.93	582	47	536	192	192	0	#N/A	2e-06	VACV			FALSE
20221010_MS_zenoSWATH_DC24_VACV_65C_r2.wiff	65C_r2	SSYTNQTLS	9	C41H65N11O18	SSYTNQTLS	SSYTNQTLS	SSYTNQTLS	SSYTNQTLS	0.3516	0.5188	#N/A	31.19+/-2.22	0.3622	999.451	2	500.733	#N/A	31.93	1032	521	511	0	0	0	#N/A	7e-06	VACV			FALSE
20221010_MS_zenoSWATH_DC24_VACV_65C_r3.wiff	65C_r3	SSYTNQTLS	9	C41H65N11O18	SSYTNQTLS	SSYTNQTLS	SSYTNQTLS	SSYTNQTLS	0.5698	0.202	#N/A	31.19+/-2.22	0.06	999.451	2	500.733	#N/A	31.93	1674	187	1487	0	0	0	#N/A	5e-06	VACV			FALSE
20221010_MS_zenoSWATH_DC24_VACV_69C_r1.wiff	69C_r1	SSYTNQTLS	9	C41H65N11O18	SSYTNQTLS	SSYTNQTLS	SSYTNQTLS	SSYTNQTLS	0.3233	0.9129	#N/A	31.19+/-2.22	0.3403	999.451	2	500.733	#N/A	31.93	555	317	238	20	20	0	#N/A	2e-06	VACV			FALSE
20221010_MS_zenoSWATH_DC24_VACV_69C_r2.wiff	69C_r2	SSYTNQTLS	9	C41H65N11O18	SSYTNQTLS	SSYTNQTLS	SSYTNQTLS	SSYTNQTLS	0.3991	0.8186	#N/A	31.19+/-2.22	0.327	999.451	2	500.733	#N/A	31.93	785	252	533	0	0	0	#N/A	3e-06	VACV			FALSE
20221010_MS_zenoSWATH_DC24_VACV_69C_r3.wiff	69C_r3	SSYTNQTLS	9	C41H65N11O18	SSYTNQTLS	SSYTNQTLS	SSYTNQTLS	SSYTNQTLS	0.3384	0.6972	#N/A	31.19+/-2.22	0.3687	999.451	2	500.733	#N/A	31.93	334	150	185	130	130	0	#N/A	3e-06	VACV			FALSE
20221010_MS_zenoSWATH_DC24_VACV_73C_r1.wiff	73C_r1	SSYTNQTLS	9	C41H65N11O18	SSYTNQTLS	SSYTNQTLS	SSYTNQTLS	SSYTNQTLS	0.1631	0.4855	#N/A	31.19+/-2.22	0.3995	999.451	2	500.733	#N/A	31.93	211	19	192	0	0	0	#N/A	1e-06	VACV			FALSE
20221010_MS_zenoSWATH_DC24_VACV_73C_r2.wiff	73C_r2	SSYTNQTLS	9	C41H65N11O18	SSYTNQTLS	SSYTNQTLS	SSYTNQTLS	SSYTNQTLS	0.4226	0.7605	#N/A	31.19+/-2.22	0.2738	999.451	2	500.733	#N/A	31.93	482	55	427	0	0	0	#N/A	4e-06	VACV			FALSE
20221010_MS_zenoSWATH_DC24_VACV_73C_r3.wiff	73C_r3	SSYTNQTLS	9	C41H65N11O18	SSYTNQTLS	SSYTNQTLS	SSYTNQTLS	SSYTNQTLS	0.2313	0.4235	#N/A	31.19+/-2.22	0.2782	999.451	2	500.733	#N/A	31.93	547	98	449	0	0	0	#N/A	2e-06	VACV			FALSE
20221010_MS_zenoSWATH_DC24_VACV_37C_r1.wiff	37C_r1	SQIVDDDFI	9	C46H70N10O18	SQIVDDDFI	SQIVDDDFI	SQIVDDDFI	SQIVDDDFI	0.9729	0.9916	#N/A	31.8+/-0.68	0	1050.49	2	526.251	#N/A	31.47	583753	219443	364309	0	0	0	#N/A	0.00062	VACV			FALSE
20221010_MS_zenoSWATH_DC24_VACV_37C_r2.wiff	37C_r2	SQIVDDDFI	9	C46H70N10O18	SQIVDDDFI	SQIVDDDFI	SQIVDDDFI	SQIVDDDFI	0.9864	0.9915	#N/A	31.8+/-0.68	0	1050.49	2	526.251	#N/A	31.47	445268	163042	282225	0	0	0	#N/A	0.000699	VACV			FALSE
20221010_MS_zenoSWATH_DC24_VACV_37C_r3.wiff	37C_r3	SQIVDDDFI	9	C46H70N10O18	SQIVDDDFI	SQIVDDDFI	SQIVDDDFI	SQIVDDDFI	0.973	0.9916	#N/A	31.8+/-0.68	0	1050.49	2	526.251	#N/A	31.47	491686	175385	316301	2018	164	1855	#N/A	0.000643	VACV			FALSE
20221010_MS_zenoSWATH_DC24_VACV_41C_r1.wiff	41C_r1	SQIVDDDFI	9	C46H70N10O18	SQIVDDDFI	SQIVDDDFI	SQIVDDDFI	SQIVDDDFI	0.9686	0.996	#N/A	31.8+/-0.68	0	1050.49	2	526.251	#N/A	31.47	548598	201025	347574	2033	992	1041	#N/A	0.000669	VACV			FALSE
20221010_MS_zenoSWATH_DC24_VACV_41C_r2.wiff	41C_r2	SQIVDDDFI	9	C46H70N10O18	SQIVDDDFI	SQIVDDDFI	SQIVDDDFI	SQIVDDDFI	0.9713	0.9967	#N/A	31.8+/-0.68	0	1050.49	2	526.251	#N/A	31.47	454626	167193	287433	36	36	0	#N/A	0.000652	VACV			FALSE
20221010_MS_zenoSWATH_DC24_VACV_41C_r3.wiff	41C_r3	SQIVDDDFI	9	C46H70N10O18	SQIVDDDFI	SQIVDDDFI	SQIVDDDFI	SQIVDDDFI	0.966	0.9854	#N/A	31.8+/-0.68	0	1050.49	2	526.251	#N/A	31.47	321134	120000	201134	1552	273	1279	#N/A	0.000453	VACV			FALSE
20221010_MS_zenoSWATH_DC24_VACV_45C_r1.wiff	45C_r1	SQIVDDDFI	9	C46H70N10O18	SQIVDDDFI	SQIVDDDFI	SQIVDDDFI	SQIVDDDFI	0.9699	0.9865	#N/A	31.8+/-0.68	0	1050.49	2	526.251	#N/A	31.47	393573	143858	249715	1017	471	546	#N/A	0.00043	VACV			FALSE
20221010_MS_zenoSWATH_DC24_VACV_45C_r2.wiff	45C_r2	SQIVDDDFI	9	C46H70N10O18	SQIVDDDFI	SQIVDDDFI	SQIVDDDFI	SQIVDDDFI	0.9754	0.9952	#N/A	31.8+/-0.68	0	1050.49	2	526.251	#N/A	31.47	234565	88433	146131	2861	0	2861	#N/A	0.000407	VACV			FALSE
20221010_MS_zenoSWATH_DC24_VACV_45C_r3.wiff	45C_r3	SQIVDDDFI	9	C46H70N10O18	SQIVDDDFI	SQIVDDDFI	SQIVDDDFI	SQIVDDDFI	0.9799	0.9853	#N/A	31.8+/-0.68	0	1050.49	2	526.251	#N/A	31.47	329422	123388	206033	2283	0	2283	#N/A	0.00038	VACV			FALSE
20221010_MS_zenoSWATH_DC24_VACV_49C_r1.wiff	49C_r1	SQIVDDDFI	9	C46H70N10O18	SQIVDDDFI	SQIVDDDFI	SQIVDDDFI	SQIVDDDFI	0.9457	0.9882	#N/A	31.8+/-0.68	0	1050.49	2	526.251	#N/A	31.47	127291	47138	80153	0	0	0	#N/A	0.000268	VACV			FALSE
20221010_MS_zenoSWATH_DC24_VACV_49C_r2.wiff	49C_r2	SQIVDDDFI	9	C46H70N10O18	SQIVDDDFI	SQIVDDDFI	SQIVDDDFI	SQIVDDDFI	0.9497	0.9934	#N/A	31.8+/-0.68	0	1050.49	2	526.251	#N/A	31.47	127493	48178	79315	847	847	0	#N/A	0.000205	VACV			FALSE
20221010_MS_zenoSWATH_DC24_VACV_49C_r3.wiff	49C_r3	SQIVDDDFI	9	C46H70N10O18	SQIVDDDFI	SQIVDDDFI	SQIVDDDFI	SQIVDDDFI	0.9648	0.9934	#N/A	31.8+/-0.68	0	1050.49	2	526.251	#N/A	31.47	107598	39450	68149	0	0	0	#N/A	0.000244	VACV			FALSE
20221010_MS_zenoSWATH_DC24_VACV_53C_r1.wiff	53C_r1	SQIVDDDFI	9	C46H70N10O18	SQIVDDDFI	SQIVDDDFI	SQIVDDDFI	SQIVDDDFI	0.9414	0.9794	#N/A	31.8+/-0.68	0	1050.49	2	526.251	#N/A	31.47	40833	14971	25862	0	0	0	#N/A	7.7e-05	VACV			FALSE
20221010_MS_zenoSWATH_DC24_VACV_53C_r2.wiff	53C_r2	SQIVDDDFI	9	C46H70N10O18	SQIVDDDFI	SQIVDDDFI	SQIVDDDFI	SQIVDDDFI	0.9249	0.963	#N/A	31.8+/-0.68	0	1050.49	2	526.251	#N/A	31.47	53132	18957	34175	0	0	0	#N/A	0.000127	VACV			FALSE
20221010_MS_zenoSWATH_DC24_VACV_53C_r3.wiff	53C_r3	SQIVDDDFI	9	C46H70N10O18	SQIVDDDFI	SQIVDDDFI	SQIVDDDFI	SQIVDDDFI	0.8857	0.9355	#N/A	31.8+/-0.68	0	1050.49	2	526.251	#N/A	31.47	29538	10734	18804	0	0	0	#N/A	0.000101	VACV			FALSE
20221010_MS_zenoSWATH_DC24_VACV_57C_r1.wiff	57C_r1	SQIVDDDFI	9	C46H70N10O18	SQIVDDDFI	SQIVDDDFI	SQIVDDDFI	SQIVDDDFI	0.9215	0.9772	#N/A	31.8+/-0.68	0.001	1050.49	2	526.251	#N/A	31.47	12701	5713	6988	0	0	0	#N/A	5e-05	VACV			FALSE
20221010_MS_zenoSWATH_DC24_VACV_57C_r2.wiff	57C_r2	SQIVDDDFI	9	C46H70N10O18	SQIVDDDFI	SQIVDDDFI	SQIVDDDFI	SQIVDDDFI	0.8032	0.9362	#N/A	31.8+/-0.68	0.205	1050.49	2	526.251	#N/A	31.47	7054	3071	3983	0	0	0	#N/A	3.8e-05	VACV			FALSE
20221010_MS_zenoSWATH_DC24_VACV_57C_r3.wiff	57C_r3	SQIVDDDFI	9	C46H70N10O18	SQIVDDDFI	SQIVDDDFI	SQIVDDDFI	SQIVDDDFI	0.7491	0.7719	#N/A	31.8+/-0.68	0.0146	1050.49	2	526.251	#N/A	31.47	996	315	681	20	20	0	#N/A	4e-06	VACV			FALSE
20221010_MS_zenoSWATH_DC24_VACV_61C_r1.wiff	61C_r1	SQIVDDDFI	9	C46H70N10O18	SQIVDDDFI	SQIVDDDFI	SQIVDDDFI	SQIVDDDFI	0.6363	0.7831	#N/A	31.8+/-0.68	0.0659	1050.49	2	526.251	#N/A	31.47	6943	1270	5674	461	192	269	#N/A	1.8e-05	VACV			FALSE
20221010_MS_zenoSWATH_DC24_VACV_61C_r2.wiff	61C_r2	SQIVDDDFI	9	C46H70N10O18	SQIVDDDFI	SQIVDDDFI	SQIVDDDFI	SQIVDDDFI	0.6085	0.8223	#N/A	31.8+/-0.68	0.0264	1050.49	2	526.251	#N/A	31.47	2791	734	2057	18	18	0	#N/A	8e-06	VACV			FALSE
20221010_MS_zenoSWATH_DC24_VACV_61C_r3.wiff	61C_r3	SQIVDDDFI	9	C46H70N10O18	SQIVDDDFI	SQIVDDDFI	SQIVDDDFI	SQIVDDDFI	0.6041	0.5685	#N/A	31.8+/-0.68	0.0677	1050.49	2	526.251	#N/A	31.47	4793	1322	3471	0	0	0	#N/A	1.6e-05	VACV			FALSE
20221010_MS_zenoSWATH_DC24_VACV_65C_r1.wiff	65C_r1	SQIVDDDFI	9	C46H70N10O18	SQIVDDDFI	SQIVDDDFI	SQIVDDDFI	SQIVDDDFI	0.7298	0.6643	#N/A	31.8+/-0.68	0.1881	1050.49	2	526.251	#N/A	31.47	4152	2009	2143	0	0	0	#N/A	1.4e-05	VACV			FALSE
20221010_MS_zenoSWATH_DC24_VACV_65C_r2.wiff	65C_r2	SQIVDDDFI	9	C46H70N10O18	SQIVDDDFI	SQIVDDDFI	SQIVDDDFI	SQIVDDDFI	0.2652	0.5647	#N/A	31.8+/-0.68	0.3995	1050.49	2	526.251	#N/A	31.47	646	472	175	0	0	0	#N/A	4e-06	VACV			FALSE
20221010_MS_zenoSWATH_DC24_VACV_65C_r3.wiff	65C_r3	SQIVDDDFI	9	C46H70N10O18	SQIVDDDFI	SQIVDDDFI	SQIVDDDFI	SQIVDDDFI	0.7575	0.9341	#N/A	31.8+/-0.68	0.0208	1050.49	2	526.251	#N/A	31.47	2801	1492	1309	0	0	0	#N/A	9e-06	VACV			FALSE
20221010_MS_zenoSWATH_DC24_VACV_69C_r1.wiff	69C_r1	SQIVDDDFI	9	C46H70N10O18	SQIVDDDFI	SQIVDDDFI	SQIVDDDFI	SQIVDDDFI	0.4727	0.4755	#N/A	31.8+/-0.68	0.0902	1050.49	2	526.251	#N/A	31.47	2035	149	1886	0	0	0	#N/A	8e-06	VACV			FALSE
20221010_MS_zenoSWATH_DC24_VACV_69C_r2.wiff	69C_r2	SQIVDDDFI	9	C46H70N10O18	SQIVDDDFI	SQIVDDDFI	SQIVDDDFI	SQIVDDDFI	0.5474	0.4336	#N/A	31.8+/-0.68	0.2347	1050.49	2	526.251	#N/A	31.47	767	97	669	251	251	0	#N/A	3e-06	VACV			FALSE
20221010_MS_zenoSWATH_DC24_VACV_69C_r3.wiff	69C_r3	SQIVDDDFI	9	C46H70N10O18	SQIVDDDFI	SQIVDDDFI	SQIVDDDFI	SQIVDDDFI	0.3501	0.6866	#N/A	31.8+/-0.68	0.3765	1050.49	2	526.251	#N/A	31.47	596	368	228	3	3	0	#N/A	5e-06	VACV			FALSE
20221010_MS_zenoSWATH_DC24_VACV_73C_r1.wiff	73C_r1	SQIVDDDFI	9	C46H70N10O18	SQIVDDDFI	SQIVDDDFI	SQIVDDDFI	SQIVDDDFI	0.2711	0.4535	#N/A	31.8+/-0.68	0.3023	1050.49	2	526.251	#N/A	31.47	503	43	460	0	0	0	#N/A	3e-06	VACV			FALSE
20221010_MS_zenoSWATH_DC24_VACV_73C_r2.wiff	73C_r2	SQIVDDDFI	9	C46H70N10O18	SQIVDDDFI	SQIVDDDFI	SQIVDDDFI	SQIVDDDFI	0.2466	0.2137	#N/A	31.8+/-0.68	0.3221	1050.49	2	526.251	#N/A	31.47	1493	62	1430	0	0	0	#N/A	1.2e-05	VACV			FALSE
20221010_MS_zenoSWATH_DC24_VACV_73C_r3.wiff	73C_r3	SQIVDDDFI	9	C46H70N10O18	SQIVDDDFI	SQIVDDDFI	SQIVDDDFI	SQIVDDDFI	0.3436	0.5996	#N/A	31.8+/-0.68	0.0942	1050.49	2	526.251	#N/A	31.47	2202	840	1362	3	3	0	#N/A	8e-06	VACV			FALSE
20221010_MS_zenoSWATH_DC24_VACV_37C_r1.wiff	37C_r1	SQIVDDDFI	9	C46H69N9O19	SQ[+1]IVDDDFI	SQ(unimod:7)IVDDDFI	SQ[Dea]IVDDDFI	SQ[Deamidated (NQ)]IVDDDFI	0.7229	0.378	#N/A	31.56+/-1.07	0.0135	1051.47	2	526.743	#N/A	31.45	144894	5752	139142	0	0	0	#N/A	0.000154	VACV			FALSE
20221010_MS_zenoSWATH_DC24_VACV_37C_r2.wiff	37C_r2	SQIVDDDFI	9	C46H69N9O19	SQ[+1]IVDDDFI	SQ(unimod:7)IVDDDFI	SQ[Dea]IVDDDFI	SQ[Deamidated (NQ)]IVDDDFI	0.7669	0.214	#N/A	31.56+/-1.07	0	1051.47	2	526.743	#N/A	31.45	95073	733	94339	2769	0	2769	#N/A	0.000149	VACV			FALSE
20221010_MS_zenoSWATH_DC24_VACV_37C_r3.wiff	37C_r3	SQIVDDDFI	9	C46H69N9O19	SQ[+1]IVDDDFI	SQ(unimod:7)IVDDDFI	SQ[Dea]IVDDDFI	SQ[Deamidated (NQ)]IVDDDFI	0.7022	0.9599	#N/A	31.56+/-1.07	0.0126	1051.47	2	526.743	#N/A	31.45	127020	2389	124631	437	437	0	#N/A	0.000166	VACV			FALSE
20221010_MS_zenoSWATH_DC24_VACV_41C_r1.wiff	41C_r1	SQIVDDDFI	9	C46H69N9O19	SQ[+1]IVDDDFI	SQ(unimod:7)IVDDDFI	SQ[Dea]IVDDDFI	SQ[Deamidated (NQ)]IVDDDFI	0.7302	0.7314	#N/A	31.56+/-1.07	0.0008	1051.47	2	526.743	#N/A	31.45	126633	5611	121022	0	0	0	#N/A	0.000154	VACV			FALSE
20221010_MS_zenoSWATH_DC24_VACV_41C_r2.wiff	41C_r2	SQIVDDDFI	9	C46H69N9O19	SQ[+1]IVDDDFI	SQ(unimod:7)IVDDDFI	SQ[Dea]IVDDDFI	SQ[Deamidated (NQ)]IVDDDFI	0.7312	0.6904	#N/A	31.56+/-1.07	0.0066	1051.47	2	526.743	#N/A	31.45	91937	1693	90243	80	80	0	#N/A	0.000132	VACV			FALSE
20221010_MS_zenoSWATH_DC24_VACV_41C_r3.wiff	41C_r3	SQIVDDDFI	9	C46H69N9O19	SQ[+1]IVDDDFI	SQ(unimod:7)IVDDDFI	SQ[Dea]IVDDDFI	SQ[Deamidated (NQ)]IVDDDFI	0.7628	0.4411	#N/A	31.56+/-1.07	0.0092	1051.47	2	526.743	#N/A	31.45	77852	3229	74623	0	0	0	#N/A	0.00011	VACV			FALSE
20221010_MS_zenoSWATH_DC24_VACV_45C_r1.wiff	45C_r1	SQIVDDDFI	9	C46H69N9O19	SQ[+1]IVDDDFI	SQ(unimod:7)IVDDDFI	SQ[Dea]IVDDDFI	SQ[Deamidated (NQ)]IVDDDFI	0.7225	0.214	#N/A	31.56+/-1.07	0.0052	1051.47	2	526.743	#N/A	31.45	94580	368	94211	0	0	0	#N/A	0.000103	VACV			FALSE
20221010_MS_zenoSWATH_DC24_VACV_45C_r2.wiff	45C_r2	SQIVDDDFI	9	C46H69N9O19	SQ[+1]IVDDDFI	SQ(unimod:7)IVDDDFI	SQ[Dea]IVDDDFI	SQ[Deamidated (NQ)]IVDDDFI	0.704	0.9028	#N/A	31.56+/-1.07	0.01	1051.47	2	526.743	#N/A	31.45	58830	478	58352	155	155	0	#N/A	0.000102	VACV			FALSE
20221010_MS_zenoSWATH_DC24_VACV_45C_r3.wiff	45C_r3	SQIVDDDFI	9	C46H69N9O19	SQ[+1]IVDDDFI	SQ(unimod:7)IVDDDFI	SQ[Dea]IVDDDFI	SQ[Deamidated (NQ)]IVDDDFI	0.7301	0.6973	#N/A	31.56+/-1.07	0.0099	1051.47	2	526.743	#N/A	31.45	73864	886	72977	0	0	0	#N/A	8.5e-05	VACV			FALSE
20221010_MS_zenoSWATH_DC24_VACV_49C_r1.wiff	49C_r1	SQIVDDDFI	9	C46H69N9O19	SQ[+1]IVDDDFI	SQ(unimod:7)IVDDDFI	SQ[Dea]IVDDDFI	SQ[Deamidated (NQ)]IVDDDFI	0.7008	0.798	#N/A	31.56+/-1.07	0.022	1051.47	2	526.743	#N/A	31.45	28547	1145	27402	45	45	0	#N/A	6e-05	VACV			FALSE
20221010_MS_zenoSWATH_DC24_VACV_49C_r2.wiff	49C_r2	SQIVDDDFI	9	C46H69N9O19	SQ[+1]IVDDDFI	SQ(unimod:7)IVDDDFI	SQ[Dea]IVDDDFI	SQ[Deamidated (NQ)]IVDDDFI	0.7019	0.7045	#N/A	31.56+/-1.07	0.0146	1051.47	2	526.743	#N/A	31.45	29041	631	28410	95	95	0	#N/A	4.7e-05	VACV			FALSE
20221010_MS_zenoSWATH_DC24_VACV_49C_r3.wiff	49C_r3	SQIVDDDFI	9	C46H69N9O19	SQ[+1]IVDDDFI	SQ(unimod:7)IVDDDFI	SQ[Dea]IVDDDFI	SQ[Deamidated (NQ)]IVDDDFI	0.7263	0.7486	#N/A	31.56+/-1.07	0.0017	1051.47	2	526.743	#N/A	31.45	30569	1083	29487	0	0	0	#N/A	6.9e-05	VACV			FALSE
20221010_MS_zenoSWATH_DC24_VACV_53C_r1.wiff	53C_r1	SQIVDDDFI	9	C46H69N9O19	SQ[+1]IVDDDFI	SQ(unimod:7)IVDDDFI	SQ[Dea]IVDDDFI	SQ[Deamidated (NQ)]IVDDDFI	0.7043	0.7043	#N/A	31.56+/-1.07	0.0184	1051.47	2	526.743	#N/A	31.45	7992	376	7616	0	0	0	#N/A	1.5e-05	VACV			FALSE
20221010_MS_zenoSWATH_DC24_VACV_53C_r2.wiff	53C_r2	SQIVDDDFI	9	C46H69N9O19	SQ[+1]IVDDDFI	SQ(unimod:7)IVDDDFI	SQ[Dea]IVDDDFI	SQ[Deamidated (NQ)]IVDDDFI	0.682	0.8107	#N/A	31.56+/-1.07	0.0208	1051.47	2	526.743	#N/A	31.45	11909	2534	9375	0	0	0	#N/A	2.9e-05	VACV			FALSE
20221010_MS_zenoSWATH_DC24_VACV_53C_r3.wiff	53C_r3	SQIVDDDFI	9	C46H69N9O19	SQ[+1]IVDDDFI	SQ(unimod:7)IVDDDFI	SQ[Dea]IVDDDFI	SQ[Deamidated (NQ)]IVDDDFI	0.6329	0.855	#N/A	31.56+/-1.07	0.1899	1051.47	2	526.743	#N/A	31.45	5800	1388	4412	0	0	0	#N/A	2e-05	VACV			FALSE
20221010_MS_zenoSWATH_DC24_VACV_57C_r1.wiff	57C_r1	SQIVDDDFI	9	C46H69N9O19	SQ[+1]IVDDDFI	SQ(unimod:7)IVDDDFI	SQ[Dea]IVDDDFI	SQ[Deamidated (NQ)]IVDDDFI	0.6435	0.863	#N/A	31.56+/-1.07	0.0835	1051.47	2	526.743	#N/A	31.45	2082	625	1457	149	149	0	#N/A	8e-06	VACV			FALSE
20221010_MS_zenoSWATH_DC24_VACV_57C_r2.wiff	57C_r2	SQIVDDDFI	9	C46H69N9O19	SQ[+1]IVDDDFI	SQ(unimod:7)IVDDDFI	SQ[Dea]IVDDDFI	SQ[Deamidated (NQ)]IVDDDFI	0.474	0.8233	#N/A	31.56+/-1.07	0.2444	1051.47	2	526.743	#N/A	31.45	2374	828	1546	0	0	0	#N/A	1.3e-05	VACV			FALSE
20221010_MS_zenoSWATH_DC24_VACV_57C_r3.wiff	57C_r3	SQIVDDDFI	9	C46H69N9O19	SQ[+1]IVDDDFI	SQ(unimod:7)IVDDDFI	SQ[Dea]IVDDDFI	SQ[Deamidated (NQ)]IVDDDFI	0.5881	0.8478	#N/A	31.56+/-1.07	0.1601	1051.47	2	526.743	#N/A	31.45	4081	1409	2672	0	0	0	#N/A	1.7e-05	VACV			FALSE
20221010_MS_zenoSWATH_DC24_VACV_61C_r1.wiff	61C_r1	SQIVDDDFI	9	C46H69N9O19	SQ[+1]IVDDDFI	SQ(unimod:7)IVDDDFI	SQ[Dea]IVDDDFI	SQ[Deamidated (NQ)]IVDDDFI	0.568	0.7246	#N/A	31.56+/-1.07	0.0519	1051.47	2	526.743	#N/A	31.45	3104	1136	1968	0	0	0	#N/A	8e-06	VACV			FALSE
20221010_MS_zenoSWATH_DC24_VACV_61C_r2.wiff	61C_r2	SQIVDDDFI	9	C46H69N9O19	SQ[+1]IVDDDFI	SQ(unimod:7)IVDDDFI	SQ[Dea]IVDDDFI	SQ[Deamidated (NQ)]IVDDDFI	0.4792	0.214	#N/A	31.56+/-1.07	0.0449	1051.47	2	526.743	#N/A	31.45	994	3	991	0	0	0	#N/A	3e-06	VACV			FALSE
20221010_MS_zenoSWATH_DC24_VACV_61C_r3.wiff	61C_r3	SQIVDDDFI	9	C46H69N9O19	SQ[+1]IVDDDFI	SQ(unimod:7)IVDDDFI	SQ[Dea]IVDDDFI	SQ[Deamidated (NQ)]IVDDDFI	0.4978	0.9107	#N/A	31.56+/-1.07	0.0696	1051.47	2	526.743	#N/A	31.45	2469	899	1570	0	0	0	#N/A	8e-06	VACV			FALSE
20221010_MS_zenoSWATH_DC24_VACV_65C_r1.wiff	65C_r1	SQIVDDDFI	9	C46H69N9O19	SQ[+1]IVDDDFI	SQ(unimod:7)IVDDDFI	SQ[Dea]IVDDDFI	SQ[Deamidated (NQ)]IVDDDFI	0.3646	0.7775	#N/A	31.56+/-1.07	0.2385	1051.47	2	526.743	#N/A	31.45	475	110	364	0	0	0	#N/A	2e-06	VACV			FALSE
20221010_MS_zenoSWATH_DC24_VACV_65C_r2.wiff	65C_r2	SQIVDDDFI	9	C46H69N9O19	SQ[+1]IVDDDFI	SQ(unimod:7)IVDDDFI	SQ[Dea]IVDDDFI	SQ[Deamidated (NQ)]IVDDDFI	0.2991	0.7139	#N/A	31.56+/-1.07	0.3995	1051.47	2	526.743	#N/A	31.45	432	241	191	0	0	0	#N/A	3e-06	VACV			FALSE
20221010_MS_zenoSWATH_DC24_VACV_65C_r3.wiff	65C_r3	SQIVDDDFI	9	C46H69N9O19	SQ[+1]IVDDDFI	SQ(unimod:7)IVDDDFI	SQ[Dea]IVDDDFI	SQ[Deamidated (NQ)]IVDDDFI	0.2424	0.688	#N/A	31.56+/-1.07	0.304	1051.47	2	526.743	#N/A	31.45	522	39	483	56	56	0	#N/A	2e-06	VACV			FALSE
20221010_MS_zenoSWATH_DC24_VACV_69C_r1.wiff	69C_r1	SQIVDDDFI	9	C46H69N9O19	SQ[+1]IVDDDFI	SQ(unimod:7)IVDDDFI	SQ[Dea]IVDDDFI	SQ[Deamidated (NQ)]IVDDDFI	0.3353	0.5469	#N/A	31.56+/-1.07	0.2757	1051.47	2	526.743	#N/A	31.45	477	155	322	0	0	0	#N/A	2e-06	VACV			FALSE
20221010_MS_zenoSWATH_DC24_VACV_69C_r2.wiff	69C_r2	SQIVDDDFI	9	C46H69N9O19	SQ[+1]IVDDDFI	SQ(unimod:7)IVDDDFI	SQ[Dea]IVDDDFI	SQ[Deamidated (NQ)]IVDDDFI	0.8516	0.5469	#N/A	31.56+/-1.07	0.0375	1051.47	2	526.743	#N/A	31.45	901	110	790	109	109	0	#N/A	3e-06	VACV			FALSE
20221010_MS_zenoSWATH_DC24_VACV_69C_r3.wiff	69C_r3	SQIVDDDFI	9	C46H69N9O19	SQ[+1]IVDDDFI	SQ(unimod:7)IVDDDFI	SQ[Dea]IVDDDFI	SQ[Deamidated (NQ)]IVDDDFI	0.2522	0.7235	#N/A	31.56+/-1.07	0.4171	1051.47	2	526.743	#N/A	31.45	350	165	186	51	51	0	#N/A	3e-06	VACV			FALSE
20221010_MS_zenoSWATH_DC24_VACV_73C_r1.wiff	73C_r1	SQIVDDDFI	9	C46H69N9O19	SQ[+1]IVDDDFI	SQ(unimod:7)IVDDDFI	SQ[Dea]IVDDDFI	SQ[Deamidated (NQ)]IVDDDFI	0.1547	0.3242	#N/A	31.56+/-1.07	0.3995	1051.47	2	526.743	#N/A	31.45	476	221	255	0	0	0	#N/A	3e-06	VACV			FALSE
20221010_MS_zenoSWATH_DC24_VACV_73C_r2.wiff	73C_r2	SQIVDDDFI	9	C46H69N9O19	SQ[+1]IVDDDFI	SQ(unimod:7)IVDDDFI	SQ[Dea]IVDDDFI	SQ[Deamidated (NQ)]IVDDDFI	0.3616	0	#N/A	31.56+/-1.07	0.2367	1051.47	2	526.743	#N/A	31.45	267	0	267	0	0	0	#N/A	2e-06	VACV			FALSE
20221010_MS_zenoSWATH_DC24_VACV_73C_r3.wiff	73C_r3	SQIVDDDFI	9	C46H69N9O19	SQ[+1]IVDDDFI	SQ(unimod:7)IVDDDFI	SQ[Dea]IVDDDFI	SQ[Deamidated (NQ)]IVDDDFI	0.4101	0.7078	#N/A	31.56+/-1.07	0.2128	1051.47	2	526.743	#N/A	31.45	1763	500	1263	0	0	0	#N/A	7e-06	VACV			FALSE
20221010_MS_zenoSWATH_DC24_VACV_37C_r1.wiff	37C_r1	VTKYYINL	8	C49H76N10O13	VTKYYINL	VTKYYINL	VTKYYINL	VTKYYINL	0.9634	0.9971	#N/A	26.74+/-0.8	0	1012.56	2	507.287	#N/A	26.5	630484	286502	343982	0	0	0	#N/A	0.00067	VACV			FALSE
20221010_MS_zenoSWATH_DC24_VACV_37C_r2.wiff	37C_r2	VTKYYINL	8	C49H76N10O13	VTKYYINL	VTKYYINL	VTKYYINL	VTKYYINL	0.9169	0.9968	#N/A	26.74+/-0.8	0	1012.56	2	507.287	#N/A	26.5	472634	207931	264703	725	725	0	#N/A	0.000742	VACV			FALSE
20221010_MS_zenoSWATH_DC24_VACV_37C_r3.wiff	37C_r3	VTKYYINL	8	C49H76N10O13	VTKYYINL	VTKYYINL	VTKYYINL	VTKYYINL	0.9781	0.9962	#N/A	26.74+/-0.8	0	1012.56	2	507.287	#N/A	26.5	516580	230863	285716	0	0	0	#N/A	0.000676	VACV			FALSE
20221010_MS_zenoSWATH_DC24_VACV_41C_r1.wiff	41C_r1	VTKYYINL	8	C49H76N10O13	VTKYYINL	VTKYYINL	VTKYYINL	VTKYYINL	0.9392	0.9934	#N/A	26.74+/-0.8	0	1012.56	2	507.287	#N/A	26.5	539764	239971	299793	0	0	0	#N/A	0.000658	VACV			FALSE
20221010_MS_zenoSWATH_DC24_VACV_41C_r2.wiff	41C_r2	VTKYYINL	8	C49H76N10O13	VTKYYINL	VTKYYINL	VTKYYINL	VTKYYINL	0.9367	0.9964	#N/A	26.74+/-0.8	0	1012.56	2	507.287	#N/A	26.5	511053	224129	286923	2760	2760	0	#N/A	0.000733	VACV			FALSE
20221010_MS_zenoSWATH_DC24_VACV_41C_r3.wiff	41C_r3	VTKYYINL	8	C49H76N10O13	VTKYYINL	VTKYYINL	VTKYYINL	VTKYYINL	0.9445	0.998	#N/A	26.74+/-0.8	0	1012.56	2	507.287	#N/A	26.5	562607	242422	320185	1259	1259	0	#N/A	0.000794	VACV			FALSE
20221010_MS_zenoSWATH_DC24_VACV_45C_r1.wiff	45C_r1	VTKYYINL	8	C49H76N10O13	VTKYYINL	VTKYYINL	VTKYYINL	VTKYYINL	0.9638	0.9987	#N/A	26.74+/-0.8	0	1012.56	2	507.287	#N/A	26.5	474225	213700	260525	4427	4427	0	#N/A	0.000519	VACV			FALSE
20221010_MS_zenoSWATH_DC24_VACV_45C_r2.wiff	45C_r2	VTKYYINL	8	C49H76N10O13	VTKYYINL	VTKYYINL	VTKYYINL	VTKYYINL	0.9205	0.9966	#N/A	26.74+/-0.8	0	1012.56	2	507.287	#N/A	26.5	313630	139562	174068	324	324	0	#N/A	0.000544	VACV			FALSE
20221010_MS_zenoSWATH_DC24_VACV_45C_r3.wiff	45C_r3	VTKYYINL	8	C49H76N10O13	VTKYYINL	VTKYYINL	VTKYYINL	VTKYYINL	0.9357	0.9961	#N/A	26.74+/-0.8	0	1012.56	2	507.287	#N/A	26.5	503001	223831	279170	2184	2184	0	#N/A	0.00058	VACV			FALSE
20221010_MS_zenoSWATH_DC24_VACV_49C_r1.wiff	49C_r1	VTKYYINL	8	C49H76N10O13	VTKYYINL	VTKYYINL	VTKYYINL	VTKYYINL	0.8381	0.9903	#N/A	26.74+/-0.8	0	1012.56	2	507.287	#N/A	26.5	68532	29576	38956	0	0	0	#N/A	0.000144	VACV			FALSE
20221010_MS_zenoSWATH_DC24_VACV_49C_r2.wiff	49C_r2	VTKYYINL	8	C49H76N10O13	VTKYYINL	VTKYYINL	VTKYYINL	VTKYYINL	0.9395	0.9951	#N/A	26.74+/-0.8	0	1012.56	2	507.287	#N/A	26.5	236186	101175	135011	2679	2301	378	#N/A	0.000381	VACV			FALSE
20221010_MS_zenoSWATH_DC24_VACV_49C_r3.wiff	49C_r3	VTKYYINL	8	C49H76N10O13	VTKYYINL	VTKYYINL	VTKYYINL	VTKYYINL	0.9151	0.986	#N/A	26.74+/-0.8	0	1012.56	2	507.287	#N/A	26.5	177626	76831	100795	69	69	0	#N/A	0.000402	VACV			FALSE
20221010_MS_zenoSWATH_DC24_VACV_53C_r1.wiff	53C_r1	VTKYYINL	8	C49H76N10O13	VTKYYINL	VTKYYINL	VTKYYINL	VTKYYINL	0.9328	0.988	#N/A	26.74+/-0.8	0	1012.56	2	507.287	#N/A	26.5	58230	25830	32401	157	157	0	#N/A	0.00011	VACV			FALSE
20221010_MS_zenoSWATH_DC24_VACV_53C_r2.wiff	53C_r2	VTKYYINL	8	C49H76N10O13	VTKYYINL	VTKYYINL	VTKYYINL	VTKYYINL	0.9392	0.9808	#N/A	26.74+/-0.8	0.0003	1012.56	2	507.287	#N/A	26.5	60256	27289	32966	863	863	0	#N/A	0.000145	VACV			FALSE
20221010_MS_zenoSWATH_DC24_VACV_53C_r3.wiff	53C_r3	VTKYYINL	8	C49H76N10O13	VTKYYINL	VTKYYINL	VTKYYINL	VTKYYINL	0.9263	0.9824	#N/A	26.74+/-0.8	0.0002	1012.56	2	507.287	#N/A	26.5	40159	18256	21902	75	75	0	#N/A	0.000137	VACV			FALSE
20221010_MS_zenoSWATH_DC24_VACV_57C_r1.wiff	57C_r1	VTKYYINL	8	C49H76N10O13	VTKYYINL	VTKYYINL	VTKYYINL	VTKYYINL	0.8007	0.8626	#N/A	26.74+/-0.8	0.0019	1012.56	2	507.287	#N/A	26.5	11511	7465	4046	0	0	0	#N/A	4.5e-05	VACV			FALSE
20221010_MS_zenoSWATH_DC24_VACV_57C_r2.wiff	57C_r2	VTKYYINL	8	C49H76N10O13	VTKYYINL	VTKYYINL	VTKYYINL	VTKYYINL	0.6253	0.7989	#N/A	26.74+/-0.8	0.2533	1012.56	2	507.287	#N/A	26.5	1918	996	922	1790	1790	0	#N/A	1e-05	VACV			FALSE
20221010_MS_zenoSWATH_DC24_VACV_57C_r3.wiff	57C_r3	VTKYYINL	8	C49H76N10O13	VTKYYINL	VTKYYINL	VTKYYINL	VTKYYINL	0.6964	0.5879	#N/A	26.74+/-0.8	0.1537	1012.56	2	507.287	#N/A	26.5	1933	762	1171	1388	1388	0	#N/A	8e-06	VACV			FALSE
20221010_MS_zenoSWATH_DC24_VACV_61C_r1.wiff	61C_r1	VTKYYINL	8	C49H76N10O13	VTKYYINL	VTKYYINL	VTKYYINL	VTKYYINL	0.8091	0.7128	#N/A	26.74+/-0.8	0.066	1012.56	2	507.287	#N/A	26.5	9546	6350	3196	9435	9435	0	#N/A	2.4e-05	VACV			FALSE
20221010_MS_zenoSWATH_DC24_VACV_61C_r2.wiff	61C_r2	VTKYYINL	8	C49H76N10O13	VTKYYINL	VTKYYINL	VTKYYINL	VTKYYINL	0.76	0.8655	#N/A	26.74+/-0.8	0.0053	1012.56	2	507.287	#N/A	26.5	8405	5114	3291	47	47	0	#N/A	2.5e-05	VACV			FALSE
20221010_MS_zenoSWATH_DC24_VACV_61C_r3.wiff	61C_r3	VTKYYINL	8	C49H76N10O13	VTKYYINL	VTKYYINL	VTKYYINL	VTKYYINL	0.5898	0.8359	#N/A	26.74+/-0.8	0.0802	1012.56	2	507.287	#N/A	26.5	4224	2191	2032	2197	2197	0	#N/A	1.4e-05	VACV			FALSE
20221010_MS_zenoSWATH_DC24_VACV_65C_r1.wiff	65C_r1	VTKYYINL	8	C49H76N10O13	VTKYYINL	VTKYYINL	VTKYYINL	VTKYYINL	0.7263	0.825	#N/A	26.74+/-0.8	0.0066	1012.56	2	507.287	#N/A	26.5	2803	1000	1803	1297	1297	0	#N/A	9e-06	VACV			FALSE
20221010_MS_zenoSWATH_DC24_VACV_65C_r2.wiff	65C_r2	VTKYYINL	8	C49H76N10O13	VTKYYINL	VTKYYINL	VTKYYINL	VTKYYINL	0.3197	0.7949	#N/A	26.74+/-0.8	0.2804	1012.56	2	507.287	#N/A	26.5	1014	838	176	23	23	0	#N/A	7e-06	VACV			FALSE
20221010_MS_zenoSWATH_DC24_VACV_65C_r3.wiff	65C_r3	VTKYYINL	8	C49H76N10O13	VTKYYINL	VTKYYINL	VTKYYINL	VTKYYINL	0.3972	0.8767	#N/A	26.74+/-0.8	0.2632	1012.56	2	507.287	#N/A	26.5	2519	1890	629	57	57	0	#N/A	8e-06	VACV			FALSE
20221010_MS_zenoSWATH_DC24_VACV_69C_r1.wiff	69C_r1	VTKYYINL	8	C49H76N10O13	VTKYYINL	VTKYYINL	VTKYYINL	VTKYYINL	0.399	0.7719	#N/A	26.74+/-0.8	0.1687	1012.56	2	507.287	#N/A	26.5	4581	1477	3104	0	0	0	#N/A	1.8e-05	VACV			FALSE
20221010_MS_zenoSWATH_DC24_VACV_69C_r2.wiff	69C_r2	VTKYYINL	8	C49H76N10O13	VTKYYINL	VTKYYINL	VTKYYINL	VTKYYINL	0.3769	0.6637	#N/A	26.74+/-0.8	0.2156	1012.56	2	507.287	#N/A	26.5	1256	490	766	891	891	0	#N/A	5e-06	VACV			FALSE
20221010_MS_zenoSWATH_DC24_VACV_69C_r3.wiff	69C_r3	VTKYYINL	8	C49H76N10O13	VTKYYINL	VTKYYINL	VTKYYINL	VTKYYINL	0.4115	0.8485	#N/A	26.74+/-0.8	0.2861	1012.56	2	507.287	#N/A	26.5	1206	837	369	0	0	0	#N/A	1e-05	VACV			FALSE
20221010_MS_zenoSWATH_DC24_VACV_73C_r1.wiff	73C_r1	VTKYYINL	8	C49H76N10O13	VTKYYINL	VTKYYINL	VTKYYINL	VTKYYINL	0.1524	0.6244	#N/A	26.74+/-0.8	0.3995	1012.56	2	507.287	#N/A	26.5	613	459	154	17	17	0	#N/A	4e-06	VACV			FALSE
20221010_MS_zenoSWATH_DC24_VACV_73C_r2.wiff	73C_r2	VTKYYINL	8	C49H76N10O13	VTKYYINL	VTKYYINL	VTKYYINL	VTKYYINL	0.4031	0.787	#N/A	26.74+/-0.8	0.1337	1012.56	2	507.287	#N/A	26.5	1168	484	684	0	0	0	#N/A	9e-06	VACV			FALSE
20221010_MS_zenoSWATH_DC24_VACV_73C_r3.wiff	73C_r3	VTKYYINL	8	C49H76N10O13	VTKYYINL	VTKYYINL	VTKYYINL	VTKYYINL	0.4852	0.6517	#N/A	26.74+/-0.8	0.2676	1012.56	2	507.287	#N/A	26.5	1030	19	1012	130	130	0	#N/A	4e-06	VACV			FALSE
20221010_MS_zenoSWATH_DC24_VACV_37C_r1.wiff	37C_r1	SAPMNVDNLIM	11	C50H85N13O17S2	SAPMNVDNLIM	SAPMNVDNLIM	SAPMNVDNLIM	SAPMNVDNLIM	0.9325	0.982	#N/A	35.42+/-1.18	0	1203.56	2	602.789	#N/A	35.5	61055	28824	32231	0	0	0	#N/A	6.5e-05	VACV			FALSE
20221010_MS_zenoSWATH_DC24_VACV_37C_r2.wiff	37C_r2	SAPMNVDNLIM	11	C50H85N13O17S2	SAPMNVDNLIM	SAPMNVDNLIM	SAPMNVDNLIM	SAPMNVDNLIM	0.972	0.9952	#N/A	35.42+/-1.18	0	1203.56	2	602.789	#N/A	35.5	783299	347910	435389	3873	2448	1425	#N/A	0.00123	VACV			FALSE
20221010_MS_zenoSWATH_DC24_VACV_37C_r3.wiff	37C_r3	SAPMNVDNLIM	11	C50H85N13O17S2	SAPMNVDNLIM	SAPMNVDNLIM	SAPMNVDNLIM	SAPMNVDNLIM	0.926	0.9873	#N/A	35.42+/-1.18	0	1203.56	2	602.789	#N/A	35.5	62653	28633	34020	0	0	0	#N/A	8.2e-05	VACV			FALSE
20221010_MS_zenoSWATH_DC24_VACV_41C_r1.wiff	41C_r1	SAPMNVDNLIM	11	C50H85N13O17S2	SAPMNVDNLIM	SAPMNVDNLIM	SAPMNVDNLIM	SAPMNVDNLIM	0.9702	0.9994	#N/A	35.42+/-1.18	0	1203.56	2	602.789	#N/A	35.5	697877	305892	391985	4986	2455	2531	#N/A	0.000851	VACV			FALSE
20221010_MS_zenoSWATH_DC24_VACV_41C_r2.wiff	41C_r2	SAPMNVDNLIM	11	C50H85N13O17S2	SAPMNVDNLIM	SAPMNVDNLIM	SAPMNVDNLIM	SAPMNVDNLIM	0.9701	0.9957	#N/A	35.42+/-1.18	0	1203.56	2	602.789	#N/A	35.5	363695	172544	191151	58	58	0	#N/A	0.000521	VACV			FALSE
20221010_MS_zenoSWATH_DC24_VACV_41C_r3.wiff	41C_r3	SAPMNVDNLIM	11	C50H85N13O17S2	SAPMNVDNLIM	SAPMNVDNLIM	SAPMNVDNLIM	SAPMNVDNLIM	0.9653	0.9898	#N/A	35.42+/-1.18	0	1203.56	2	602.789	#N/A	35.5	196568	86672	109896	0	0	0	#N/A	0.000277	VACV			FALSE
20221010_MS_zenoSWATH_DC24_VACV_45C_r1.wiff	45C_r1	SAPMNVDNLIM	11	C50H85N13O17S2	SAPMNVDNLIM	SAPMNVDNLIM	SAPMNVDNLIM	SAPMNVDNLIM	0.9616	0.9902	#N/A	35.42+/-1.18	0	1203.56	2	602.789	#N/A	35.5	242985	108362	134623	0	0	0	#N/A	0.000266	VACV			FALSE
20221010_MS_zenoSWATH_DC24_VACV_45C_r2.wiff	45C_r2	SAPMNVDNLIM	11	C50H85N13O17S2	SAPMNVDNLIM	SAPMNVDNLIM	SAPMNVDNLIM	SAPMNVDNLIM	0.9667	0.9943	#N/A	35.42+/-1.18	0	1203.56	2	602.789	#N/A	35.5	315687	143619	172068	1254	407	847	#N/A	0.000548	VACV			FALSE
20221010_MS_zenoSWATH_DC24_VACV_45C_r3.wiff	45C_r3	SAPMNVDNLIM	11	C50H85N13O17S2	SAPMNVDNLIM	SAPMNVDNLIM	SAPMNVDNLIM	SAPMNVDNLIM	0.9648	0.9903	#N/A	35.42+/-1.18	0	1203.56	2	602.789	#N/A	35.5	249330	112898	136433	1376	393	984	#N/A	0.000288	VACV			FALSE
20221010_MS_zenoSWATH_DC24_VACV_49C_r1.wiff	49C_r1	SAPMNVDNLIM	11	C50H85N13O17S2	SAPMNVDNLIM	SAPMNVDNLIM	SAPMNVDNLIM	SAPMNVDNLIM	0.9622	0.9997	#N/A	35.42+/-1.18	0	1203.56	2	602.789	#N/A	35.5	469597	217767	251830	545	545	0	#N/A	0.000988	VACV			FALSE
20221010_MS_zenoSWATH_DC24_VACV_49C_r2.wiff	49C_r2	SAPMNVDNLIM	11	C50H85N13O17S2	SAPMNVDNLIM	SAPMNVDNLIM	SAPMNVDNLIM	SAPMNVDNLIM	0.9691	0.9934	#N/A	35.42+/-1.18	0	1203.56	2	602.789	#N/A	35.5	214453	95960	118492	1126	1126	0	#N/A	0.000346	VACV			FALSE
20221010_MS_zenoSWATH_DC24_VACV_49C_r3.wiff	49C_r3	SAPMNVDNLIM	11	C50H85N13O17S2	SAPMNVDNLIM	SAPMNVDNLIM	SAPMNVDNLIM	SAPMNVDNLIM	0.9778	0.9987	#N/A	35.42+/-1.18	0	1203.56	2	602.789	#N/A	35.5	284014	130520	153495	2129	727	1402	#N/A	0.000643	VACV			FALSE
20221010_MS_zenoSWATH_DC24_VACV_53C_r1.wiff	53C_r1	SAPMNVDNLIM	11	C50H85N13O17S2	SAPMNVDNLIM	SAPMNVDNLIM	SAPMNVDNLIM	SAPMNVDNLIM	0.9309	0.9984	#N/A	35.42+/-1.18	0	1203.56	2	602.789	#N/A	35.5	87899	40112	47786	230	230	0	#N/A	0.000166	VACV			FALSE
20221010_MS_zenoSWATH_DC24_VACV_53C_r2.wiff	53C_r2	SAPMNVDNLIM	11	C50H85N13O17S2	SAPMNVDNLIM	SAPMNVDNLIM	SAPMNVDNLIM	SAPMNVDNLIM	0.9339	0.9939	#N/A	35.42+/-1.18	0	1203.56	2	602.789	#N/A	35.5	100437	44912	55525	279	279	0	#N/A	0.000241	VACV			FALSE
20221010_MS_zenoSWATH_DC24_VACV_53C_r3.wiff	53C_r3	SAPMNVDNLIM	11	C50H85N13O17S2	SAPMNVDNLIM	SAPMNVDNLIM	SAPMNVDNLIM	SAPMNVDNLIM	0.9372	0.9964	#N/A	35.42+/-1.18	0.0002	1203.56	2	602.789	#N/A	35.5	34079	15390	18689	0	0	0	#N/A	0.000117	VACV			FALSE
20221010_MS_zenoSWATH_DC24_VACV_57C_r1.wiff	57C_r1	SAPMNVDNLIM	11	C50H85N13O17S2	SAPMNVDNLIM	SAPMNVDNLIM	SAPMNVDNLIM	SAPMNVDNLIM	0.9248	0.9828	#N/A	35.42+/-1.18	0	1203.56	2	602.789	#N/A	35.5	98864	42445	56419	2517	1866	651	#N/A	0.000389	VACV			FALSE
20221010_MS_zenoSWATH_DC24_VACV_57C_r2.wiff	57C_r2	SAPMNVDNLIM	11	C50H85N13O17S2	SAPMNVDNLIM	SAPMNVDNLIM	SAPMNVDNLIM	SAPMNVDNLIM	0.8445	0.9874	#N/A	35.42+/-1.18	0.0075	1203.56	2	602.789	#N/A	35.5	11900	4629	7271	0	0	0	#N/A	6.4e-05	VACV			FALSE
20221010_MS_zenoSWATH_DC24_VACV_57C_r3.wiff	57C_r3	SAPMNVDNLIM	11	C50H85N13O17S2	SAPMNVDNLIM	SAPMNVDNLIM	SAPMNVDNLIM	SAPMNVDNLIM	0.8707	0.9516	#N/A	35.42+/-1.18	0.0001	1203.56	2	602.789	#N/A	35.5	46967	21124	25843	0	0	0	#N/A	0.000193	VACV			FALSE
20221010_MS_zenoSWATH_DC24_VACV_61C_r1.wiff	61C_r1	SAPMNVDNLIM	11	C50H85N13O17S2	SAPMNVDNLIM	SAPMNVDNLIM	SAPMNVDNLIM	SAPMNVDNLIM	0.4576	0.7237	#N/A	35.42+/-1.18	0.012	1203.56	2	602.789	#N/A	35.5	11224	3810	7414	2087	1688	398	#N/A	2.8e-05	VACV			FALSE
20221010_MS_zenoSWATH_DC24_VACV_61C_r2.wiff	61C_r2	SAPMNVDNLIM	11	C50H85N13O17S2	SAPMNVDNLIM	SAPMNVDNLIM	SAPMNVDNLIM	SAPMNVDNLIM	0.647	0.8408	#N/A	35.42+/-1.18	0.0161	1203.56	2	602.789	#N/A	35.5	10266	2474	7792	886	442	444	#N/A	3.1e-05	VACV			FALSE
20221010_MS_zenoSWATH_DC24_VACV_61C_r3.wiff	61C_r3	SAPMNVDNLIM	11	C50H85N13O17S2	SAPMNVDNLIM	SAPMNVDNLIM	SAPMNVDNLIM	SAPMNVDNLIM	0.7037	0.9408	#N/A	35.42+/-1.18	0.0735	1203.56	2	602.789	#N/A	35.5	22842	8776	14066	709	0	709	#N/A	7.7e-05	VACV			FALSE
20221010_MS_zenoSWATH_DC24_VACV_65C_r1.wiff	65C_r1	SAPMNVDNLIM	11	C50H85N13O17S2	SAPMNVDNLIM	SAPMNVDNLIM	SAPMNVDNLIM	SAPMNVDNLIM	0.4618	0.73	#N/A	35.42+/-1.18	0.1866	1203.56	2	602.789	#N/A	35.5	3082	730	2352	52	52	0	#N/A	1e-05	VACV			FALSE
20221010_MS_zenoSWATH_DC24_VACV_65C_r2.wiff	65C_r2	SAPMNVDNLIM	11	C50H85N13O17S2	SAPMNVDNLIM	SAPMNVDNLIM	SAPMNVDNLIM	SAPMNVDNLIM	0.2194	0.8764	#N/A	35.42+/-1.18	0.3001	1203.56	2	602.789	#N/A	35.5	3338	539	2798	0	0	0	#N/A	2.3e-05	VACV			FALSE
20221010_MS_zenoSWATH_DC24_VACV_65C_r3.wiff	65C_r3	SAPMNVDNLIM	11	C50H85N13O17S2	SAPMNVDNLIM	SAPMNVDNLIM	SAPMNVDNLIM	SAPMNVDNLIM	0.3203	0.8842	#N/A	35.42+/-1.18	0.2457	1203.56	2	602.789	#N/A	35.5	3433	715	2718	512	512	0	#N/A	1.1e-05	VACV			FALSE
20221010_MS_zenoSWATH_DC24_VACV_69C_r1.wiff	69C_r1	SAPMNVDNLIM	11	C50H85N13O17S2	SAPMNVDNLIM	SAPMNVDNLIM	SAPMNVDNLIM	SAPMNVDNLIM	0.2723	0.9418	#N/A	35.42+/-1.18	0.2584	1203.56	2	602.789	#N/A	35.5	1839	630	1209	0	0	0	#N/A	7e-06	VACV			FALSE
20221010_MS_zenoSWATH_DC24_VACV_69C_r2.wiff	69C_r2	SAPMNVDNLIM	11	C50H85N13O17S2	SAPMNVDNLIM	SAPMNVDNLIM	SAPMNVDNLIM	SAPMNVDNLIM	0.3574	0.7145	#N/A	35.42+/-1.18	0.1506	1203.56	2	602.789	#N/A	35.5	3522	794	2729	0	0	0	#N/A	1.3e-05	VACV			FALSE
20221010_MS_zenoSWATH_DC24_VACV_69C_r3.wiff	69C_r3	SAPMNVDNLIM	11	C50H85N13O17S2	SAPMNVDNLIM	SAPMNVDNLIM	SAPMNVDNLIM	SAPMNVDNLIM	0.2528	0.9678	#N/A	35.42+/-1.18	0.2606	1203.56	2	602.789	#N/A	35.5	2297	1052	1245	166	166	0	#N/A	2e-05	VACV			FALSE
20221010_MS_zenoSWATH_DC24_VACV_73C_r1.wiff	73C_r1	SAPMNVDNLIM	11	C50H85N13O17S2	SAPMNVDNLIM	SAPMNVDNLIM	SAPMNVDNLIM	SAPMNVDNLIM	0.3327	0.4736	#N/A	35.42+/-1.18	0.2412	1203.56	2	602.789	#N/A	35.5	1279	294	985	27	27	0	#N/A	8e-06	VACV			FALSE
20221010_MS_zenoSWATH_DC24_VACV_73C_r2.wiff	73C_r2	SAPMNVDNLIM	11	C50H85N13O17S2	SAPMNVDNLIM	SAPMNVDNLIM	SAPMNVDNLIM	SAPMNVDNLIM	0.6587	0.7931	#N/A	35.42+/-1.18	0.1745	1203.56	2	602.789	#N/A	35.5	6045	1144	4901	220	0	220	#N/A	4.9e-05	VACV			FALSE
20221010_MS_zenoSWATH_DC24_VACV_73C_r3.wiff	73C_r3	SAPMNVDNLIM	11	C50H85N13O17S2	SAPMNVDNLIM	SAPMNVDNLIM	SAPMNVDNLIM	SAPMNVDNLIM	0.5342	0.8137	#N/A	35.42+/-1.18	0.0261	1203.56	2	602.789	#N/A	35.5	6139	1086	5053	0	0	0	#N/A	2.3e-05	VACV			FALSE
20221010_MS_zenoSWATH_DC24_VACV_37C_r1.wiff	37C_r1	SAPMNVDNLIM	11	C50H85N13O18S2	SAPM[+16]NVDNLIM	SAPM(unimod:35)NVDNLIM	SAPM[Oxi]NVDNLIM	SAPM[Oxidation (M)]NVDNLIM	0.9619	0.9824	#N/A	30+/-0.94	0	1219.56	2	610.786	#N/A	29.9	245595	93840	151755	5042	4660	382	#N/A	0.000261	VACV			FALSE
20221010_MS_zenoSWATH_DC24_VACV_37C_r2.wiff	37C_r2	SAPMNVDNLIM	11	C50H85N13O18S2	SAPM[+16]NVDNLIM	SAPM(unimod:35)NVDNLIM	SAPM[Oxi]NVDNLIM	SAPM[Oxidation (M)]NVDNLIM	0.9736	0.9971	#N/A	30+/-0.94	0	1219.56	2	610.786	#N/A	29.9	816119	342963	473156	9318	5172	4147	#N/A	0.001281	VACV			FALSE
20221010_MS_zenoSWATH_DC24_VACV_37C_r3.wiff	37C_r3	SAPMNVDNLIM	11	C50H85N13O18S2	SAPM[+16]NVDNLIM	SAPM(unimod:35)NVDNLIM	SAPM[Oxi]NVDNLIM	SAPM[Oxidation (M)]NVDNLIM	0.9671	0.9934	#N/A	30+/-0.94	0	1219.56	2	610.786	#N/A	29.9	260915	98637	162279	2299	2299	0	#N/A	0.000341	VACV			FALSE
20221010_MS_zenoSWATH_DC24_VACV_41C_r1.wiff	41C_r1	SAPMNVDNLIM	11	C50H85N13O18S2	SAPM[+16]NVDNLIM	SAPM(unimod:35)NVDNLIM	SAPM[Oxi]NVDNLIM	SAPM[Oxidation (M)]NVDNLIM	0.9773	0.9937	#N/A	30+/-0.94	0	1219.56	2	610.786	#N/A	29.9	1190754	490134	700619	19426	10498	8928	#N/A	0.001452	VACV			FALSE
20221010_MS_zenoSWATH_DC24_VACV_41C_r2.wiff	41C_r2	SAPMNVDNLIM	11	C50H85N13O18S2	SAPM[+16]NVDNLIM	SAPM(unimod:35)NVDNLIM	SAPM[Oxi]NVDNLIM	SAPM[Oxidation (M)]NVDNLIM	0.9694	0.9959	#N/A	30+/-0.94	0	1219.56	2	610.786	#N/A	29.9	844840	351532	493308	12027	8805	3222	#N/A	0.001211	VACV			FALSE
20221010_MS_zenoSWATH_DC24_VACV_41C_r3.wiff	41C_r3	SAPMNVDNLIM	11	C50H85N13O18S2	SAPM[+16]NVDNLIM	SAPM(unimod:35)NVDNLIM	SAPM[Oxi]NVDNLIM	SAPM[Oxidation (M)]NVDNLIM	0.9671	0.9954	#N/A	30+/-0.94	0	1219.56	2	610.786	#N/A	29.9	661598	259535	402063	4288	4288	0	#N/A	0.000934	VACV			FALSE
20221010_MS_zenoSWATH_DC24_VACV_45C_r1.wiff	45C_r1	SAPMNVDNLIM	11	C50H85N13O18S2	SAPM[+16]NVDNLIM	SAPM(unimod:35)NVDNLIM	SAPM[Oxi]NVDNLIM	SAPM[Oxidation (M)]NVDNLIM	0.964	0.9874	#N/A	30+/-0.94	0	1219.56	2	610.786	#N/A	29.9	693031	291561	401470	7060	3479	3581	#N/A	0.000758	VACV			FALSE
20221010_MS_zenoSWATH_DC24_VACV_45C_r2.wiff	45C_r2	SAPMNVDNLIM	11	C50H85N13O18S2	SAPM[+16]NVDNLIM	SAPM(unimod:35)NVDNLIM	SAPM[Oxi]NVDNLIM	SAPM[Oxidation (M)]NVDNLIM	0.9854	0.9986	#N/A	30+/-0.94	0	1219.56	2	610.786	#N/A	29.9	715075	288671	426404	1492	1492	0	#N/A	0.001241	VACV			FALSE
20221010_MS_zenoSWATH_DC24_VACV_45C_r3.wiff	45C_r3	SAPMNVDNLIM	11	C50H85N13O18S2	SAPM[+16]NVDNLIM	SAPM(unimod:35)NVDNLIM	SAPM[Oxi]NVDNLIM	SAPM[Oxidation (M)]NVDNLIM	0.9827	0.9928	#N/A	30+/-0.94	0	1219.56	2	610.786	#N/A	29.9	762846	310176	452670	11500	7830	3671	#N/A	0.00088	VACV			FALSE
20221010_MS_zenoSWATH_DC24_VACV_49C_r1.wiff	49C_r1	SAPMNVDNLIM	11	C50H85N13O18S2	SAPM[+16]NVDNLIM	SAPM(unimod:35)NVDNLIM	SAPM[Oxi]NVDNLIM	SAPM[Oxidation (M)]NVDNLIM	0.9781	0.9977	#N/A	30+/-0.94	0	1219.56	2	610.786	#N/A	29.9	734690	292330	442360	2977	1054	1923	#N/A	0.001546	VACV			FALSE
20221010_MS_zenoSWATH_DC24_VACV_49C_r2.wiff	49C_r2	SAPMNVDNLIM	11	C50H85N13O18S2	SAPM[+16]NVDNLIM	SAPM(unimod:35)NVDNLIM	SAPM[Oxi]NVDNLIM	SAPM[Oxidation (M)]NVDNLIM	0.9651	0.9928	#N/A	30+/-0.94	0	1219.56	2	610.786	#N/A	29.9	496978	195505	301473	2371	2371	0	#N/A	0.000801	VACV			FALSE
20221010_MS_zenoSWATH_DC24_VACV_49C_r3.wiff	49C_r3	SAPMNVDNLIM	11	C50H85N13O18S2	SAPM[+16]NVDNLIM	SAPM(unimod:35)NVDNLIM	SAPM[Oxi]NVDNLIM	SAPM[Oxidation (M)]NVDNLIM	0.9621	0.996	#N/A	30+/-0.94	0	1219.56	2	610.786	#N/A	29.9	477257	194580	282677	4362	3001	1361	#N/A	0.001081	VACV			FALSE
20221010_MS_zenoSWATH_DC24_VACV_53C_r1.wiff	53C_r1	SAPMNVDNLIM	11	C50H85N13O18S2	SAPM[+16]NVDNLIM	SAPM(unimod:35)NVDNLIM	SAPM[Oxi]NVDNLIM	SAPM[Oxidation (M)]NVDNLIM	0.976	0.9969	#N/A	30+/-0.94	0	1219.56	2	610.786	#N/A	29.9	198391	79151	119241	1676	1676	0	#N/A	0.000374	VACV			FALSE
20221010_MS_zenoSWATH_DC24_VACV_53C_r2.wiff	53C_r2	SAPMNVDNLIM	11	C50H85N13O18S2	SAPM[+16]NVDNLIM	SAPM(unimod:35)NVDNLIM	SAPM[Oxi]NVDNLIM	SAPM[Oxidation (M)]NVDNLIM	0.9841	0.9935	#N/A	30+/-0.94	0	1219.56	2	610.786	#N/A	29.9	246105	98090	148015	1186	1186	0	#N/A	0.000591	VACV			FALSE
20221010_MS_zenoSWATH_DC24_VACV_53C_r3.wiff	53C_r3	SAPMNVDNLIM	11	C50H85N13O18S2	SAPM[+16]NVDNLIM	SAPM(unimod:35)NVDNLIM	SAPM[Oxi]NVDNLIM	SAPM[Oxidation (M)]NVDNLIM	0.9321	0.9784	#N/A	30+/-0.94	0	1219.56	2	610.786	#N/A	29.9	99746	39405	60341	1747	1747	0	#N/A	0.000341	VACV			FALSE
20221010_MS_zenoSWATH_DC24_VACV_57C_r1.wiff	57C_r1	SAPMNVDNLIM	11	C50H85N13O18S2	SAPM[+16]NVDNLIM	SAPM(unimod:35)NVDNLIM	SAPM[Oxi]NVDNLIM	SAPM[Oxidation (M)]NVDNLIM	0.9721	0.9692	#N/A	30+/-0.94	0	1219.56	2	610.786	#N/A	29.9	72016	27127	44890	0	0	0	#N/A	0.000284	VACV			FALSE
20221010_MS_zenoSWATH_DC24_VACV_57C_r2.wiff	57C_r2	SAPMNVDNLIM	11	C50H85N13O18S2	SAPM[+16]NVDNLIM	SAPM(unimod:35)NVDNLIM	SAPM[Oxi]NVDNLIM	SAPM[Oxidation (M)]NVDNLIM	0.9382	0.9829	#N/A	30+/-0.94	0.0058	1219.56	2	610.786	#N/A	29.9	21218	10548	10670	0	0	0	#N/A	0.000115	VACV			FALSE
20221010_MS_zenoSWATH_DC24_VACV_57C_r3.wiff	57C_r3	SAPMNVDNLIM	11	C50H85N13O18S2	SAPM[+16]NVDNLIM	SAPM(unimod:35)NVDNLIM	SAPM[Oxi]NVDNLIM	SAPM[Oxidation (M)]NVDNLIM	0.9603	0.9864	#N/A	30+/-0.94	0	1219.56	2	610.786	#N/A	29.9	44387	19454	24932	327	327	0	#N/A	0.000183	VACV			FALSE
20221010_MS_zenoSWATH_DC24_VACV_61C_r1.wiff	61C_r1	SAPMNVDNLIM	11	C50H85N13O18S2	SAPM[+16]NVDNLIM	SAPM(unimod:35)NVDNLIM	SAPM[Oxi]NVDNLIM	SAPM[Oxidation (M)]NVDNLIM	0.8823	0.8896	#N/A	30+/-0.94	0	1219.56	2	610.786	#N/A	29.9	21127	10777	10350	0	0	0	#N/A	5.3e-05	VACV			FALSE
20221010_MS_zenoSWATH_DC24_VACV_61C_r2.wiff	61C_r2	SAPMNVDNLIM	11	C50H85N13O18S2	SAPM[+16]NVDNLIM	SAPM(unimod:35)NVDNLIM	SAPM[Oxi]NVDNLIM	SAPM[Oxidation (M)]NVDNLIM	0.3812	0.7215	#N/A	30+/-0.94	0.1042	1219.56	2	610.786	#N/A	29.9	4282	1965	2317	1023	1023	0	#N/A	1.3e-05	VACV			FALSE
20221010_MS_zenoSWATH_DC24_VACV_61C_r3.wiff	61C_r3	SAPMNVDNLIM	11	C50H85N13O18S2	SAPM[+16]NVDNLIM	SAPM(unimod:35)NVDNLIM	SAPM[Oxi]NVDNLIM	SAPM[Oxidation (M)]NVDNLIM	0.9051	0.9625	#N/A	30+/-0.94	0.0006	1219.56	2	610.786	#N/A	29.9	11579	4900	6679	365	365	0	#N/A	3.9e-05	VACV			FALSE
20221010_MS_zenoSWATH_DC24_VACV_65C_r1.wiff	65C_r1	SAPMNVDNLIM	11	C50H85N13O18S2	SAPM[+16]NVDNLIM	SAPM(unimod:35)NVDNLIM	SAPM[Oxi]NVDNLIM	SAPM[Oxidation (M)]NVDNLIM	0.4624	0.4317	#N/A	30+/-0.94	0.1055	1219.56	2	610.786	#N/A	29.9	822	141	680	0	0	0	#N/A	3e-06	VACV			FALSE
20221010_MS_zenoSWATH_DC24_VACV_65C_r2.wiff	65C_r2	SAPMNVDNLIM	11	C50H85N13O18S2	SAPM[+16]NVDNLIM	SAPM(unimod:35)NVDNLIM	SAPM[Oxi]NVDNLIM	SAPM[Oxidation (M)]NVDNLIM	0.2043	0.6707	#N/A	30+/-0.94	0.2536	1219.56	2	610.786	#N/A	29.9	454	227	227	66	66	0	#N/A	3e-06	VACV			FALSE
20221010_MS_zenoSWATH_DC24_VACV_65C_r3.wiff	65C_r3	SAPMNVDNLIM	11	C50H85N13O18S2	SAPM[+16]NVDNLIM	SAPM(unimod:35)NVDNLIM	SAPM[Oxi]NVDNLIM	SAPM[Oxidation (M)]NVDNLIM	0.5325	0.9189	#N/A	30+/-0.94	0.2291	1219.56	2	610.786	#N/A	29.9	1345	639	706	251	251	0	#N/A	4e-06	VACV			FALSE
20221010_MS_zenoSWATH_DC24_VACV_69C_r1.wiff	69C_r1	SAPMNVDNLIM	11	C50H85N13O18S2	SAPM[+16]NVDNLIM	SAPM(unimod:35)NVDNLIM	SAPM[Oxi]NVDNLIM	SAPM[Oxidation (M)]NVDNLIM	0.2459	0.6019	#N/A	30+/-0.94	0.228	1219.56	2	610.786	#N/A	29.9	1126	334	792	55	55	0	#N/A	4e-06	VACV			FALSE
20221010_MS_zenoSWATH_DC24_VACV_69C_r2.wiff	69C_r2	SAPMNVDNLIM	11	C50H85N13O18S2	SAPM[+16]NVDNLIM	SAPM(unimod:35)NVDNLIM	SAPM[Oxi]NVDNLIM	SAPM[Oxidation (M)]NVDNLIM	0.4391	0.6437	#N/A	30+/-0.94	0.1061	1219.56	2	610.786	#N/A	29.9	1241	629	612	30	30	0	#N/A	5e-06	VACV			FALSE
20221010_MS_zenoSWATH_DC24_VACV_69C_r3.wiff	69C_r3	SAPMNVDNLIM	11	C50H85N13O18S2	SAPM[+16]NVDNLIM	SAPM(unimod:35)NVDNLIM	SAPM[Oxi]NVDNLIM	SAPM[Oxidation (M)]NVDNLIM	0.1706	0.6681	#N/A	30+/-0.94	0.4259	1219.56	2	610.786	#N/A	29.9	372	90	283	0	0	0	#N/A	3e-06	VACV			FALSE
20221010_MS_zenoSWATH_DC24_VACV_73C_r1.wiff	73C_r1	SAPMNVDNLIM	11	C50H85N13O18S2	SAPM[+16]NVDNLIM	SAPM(unimod:35)NVDNLIM	SAPM[Oxi]NVDNLIM	SAPM[Oxidation (M)]NVDNLIM	0.2771	0.8315	#N/A	30+/-0.94	0.2762	1219.56	2	610.786	#N/A	29.9	796	140	656	55	55	0	#N/A	5e-06	VACV			FALSE
20221010_MS_zenoSWATH_DC24_VACV_73C_r2.wiff	73C_r2	SAPMNVDNLIM	11	C50H85N13O18S2	SAPM[+16]NVDNLIM	SAPM(unimod:35)NVDNLIM	SAPM[Oxi]NVDNLIM	SAPM[Oxidation (M)]NVDNLIM	0.1998	0.3935	#N/A	30+/-0.94	0.2747	1219.56	2	610.786	#N/A	29.9	480	198	282	0	0	0	#N/A	4e-06	VACV			FALSE
20221010_MS_zenoSWATH_DC24_VACV_73C_r3.wiff	73C_r3	SAPMNVDNLIM	11	C50H85N13O18S2	SAPM[+16]NVDNLIM	SAPM(unimod:35)NVDNLIM	SAPM[Oxi]NVDNLIM	SAPM[Oxidation (M)]NVDNLIM	0.3761	0.8861	#N/A	30+/-0.94	0.2403	1219.56	2	610.786	#N/A	29.9	1604	527	1077	309	309	0	#N/A	6e-06	VACV			FALSE
20221010_MS_zenoSWATH_DC24_VACV_37C_r1.wiff	37C_r1	SAPMNVDNLIM	11	C50H85N13O18S2	SAPMNVDNLIM[+16]	SAPMNVDNLIM(unimod:35)	SAPMNVDNLIM[Oxi]	SAPMNVDNLIM[Oxidation (M)]	0.9498	0.9906	#N/A	31.27+/-1.32	0	1219.56	2	610.786	#N/A	30.72	188690	110591	78098	489	489	0	#N/A	0.0002	VACV			FALSE
20221010_MS_zenoSWATH_DC24_VACV_37C_r2.wiff	37C_r2	SAPMNVDNLIM	11	C50H85N13O18S2	SAPMNVDNLIM[+16]	SAPMNVDNLIM(unimod:35)	SAPMNVDNLIM[Oxi]	SAPMNVDNLIM[Oxidation (M)]	0.9689	0.9872	#N/A	31.27+/-1.32	0	1219.56	2	610.786	#N/A	30.72	667224	388858	278367	10004	10004	0	#N/A	0.001048	VACV			FALSE
20221010_MS_zenoSWATH_DC24_VACV_37C_r3.wiff	37C_r3	SAPMNVDNLIM	11	C50H85N13O18S2	SAPMNVDNLIM[+16]	SAPMNVDNLIM(unimod:35)	SAPMNVDNLIM[Oxi]	SAPMNVDNLIM[Oxidation (M)]	0.9663	0.9909	#N/A	31.27+/-1.32	0	1219.56	2	610.786	#N/A	30.72	174968	103076	71892	901	901	0	#N/A	0.000229	VACV			FALSE
20221010_MS_zenoSWATH_DC24_VACV_41C_r1.wiff	41C_r1	SAPMNVDNLIM	11	C50H85N13O18S2	SAPMNVDNLIM[+16]	SAPMNVDNLIM(unimod:35)	SAPMNVDNLIM[Oxi]	SAPMNVDNLIM[Oxidation (M)]	0.9704	0.995	#N/A	31.27+/-1.32	0	1219.56	2	610.786	#N/A	30.72	815713	487695	328017	9920	9920	0	#N/A	0.000994	VACV			FALSE
20221010_MS_zenoSWATH_DC24_VACV_41C_r2.wiff	41C_r2	SAPMNVDNLIM	11	C50H85N13O18S2	SAPMNVDNLIM[+16]	SAPMNVDNLIM(unimod:35)	SAPMNVDNLIM[Oxi]	SAPMNVDNLIM[Oxidation (M)]	0.9674	0.9965	#N/A	31.27+/-1.32	0	1219.56	2	610.786	#N/A	30.72	615982	365799	250183	4518	4518	0	#N/A	0.000883	VACV			FALSE
20221010_MS_zenoSWATH_DC24_VACV_41C_r3.wiff	41C_r3	SAPMNVDNLIM	11	C50H85N13O18S2	SAPMNVDNLIM[+16]	SAPMNVDNLIM(unimod:35)	SAPMNVDNLIM[Oxi]	SAPMNVDNLIM[Oxidation (M)]	0.963	0.9918	#N/A	31.27+/-1.32	0	1219.56	2	610.786	#N/A	30.72	412409	249334	163075	5742	5033	709	#N/A	0.000582	VACV			FALSE
20221010_MS_zenoSWATH_DC24_VACV_45C_r1.wiff	45C_r1	SAPMNVDNLIM	11	C50H85N13O18S2	SAPMNVDNLIM[+16]	SAPMNVDNLIM(unimod:35)	SAPMNVDNLIM[Oxi]	SAPMNVDNLIM[Oxidation (M)]	0.9575	0.9973	#N/A	31.27+/-1.32	0	1219.56	2	610.786	#N/A	30.72	485027	287536	197491	1600	1022	578	#N/A	0.00053	VACV			FALSE
20221010_MS_zenoSWATH_DC24_VACV_45C_r2.wiff	45C_r2	SAPMNVDNLIM	11	C50H85N13O18S2	SAPMNVDNLIM[+16]	SAPMNVDNLIM(unimod:35)	SAPMNVDNLIM[Oxi]	SAPMNVDNLIM[Oxidation (M)]	0.964	0.9956	#N/A	31.27+/-1.32	0	1219.56	2	610.786	#N/A	30.72	483152	288544	194608	8416	8416	0	#N/A	0.000838	VACV			FALSE
20221010_MS_zenoSWATH_DC24_VACV_45C_r3.wiff	45C_r3	SAPMNVDNLIM	11	C50H85N13O18S2	SAPMNVDNLIM[+16]	SAPMNVDNLIM(unimod:35)	SAPMNVDNLIM[Oxi]	SAPMNVDNLIM[Oxidation (M)]	0.9476	0.9954	#N/A	31.27+/-1.32	0	1219.56	2	610.786	#N/A	30.72	537894	324272	213622	6408	6408	0	#N/A	0.00062	VACV			FALSE
20221010_MS_zenoSWATH_DC24_VACV_49C_r1.wiff	49C_r1	SAPMNVDNLIM	11	C50H85N13O18S2	SAPMNVDNLIM[+16]	SAPMNVDNLIM(unimod:35)	SAPMNVDNLIM[Oxi]	SAPMNVDNLIM[Oxidation (M)]	0.974	0.9969	#N/A	31.27+/-1.32	0	1219.56	2	610.786	#N/A	30.72	603591	363004	240587	6107	6107	0	#N/A	0.00127	VACV			FALSE
20221010_MS_zenoSWATH_DC24_VACV_49C_r2.wiff	49C_r2	SAPMNVDNLIM	11	C50H85N13O18S2	SAPMNVDNLIM[+16]	SAPMNVDNLIM(unimod:35)	SAPMNVDNLIM[Oxi]	SAPMNVDNLIM[Oxidation (M)]	0.9535	0.995	#N/A	31.27+/-1.32	0	1219.56	2	610.786	#N/A	30.72	352051	207310	144741	2925	2925	0	#N/A	0.000567	VACV			FALSE
20221010_MS_zenoSWATH_DC24_VACV_49C_r3.wiff	49C_r3	SAPMNVDNLIM	11	C50H85N13O18S2	SAPMNVDNLIM[+16]	SAPMNVDNLIM(unimod:35)	SAPMNVDNLIM[Oxi]	SAPMNVDNLIM[Oxidation (M)]	0.961	0.994	#N/A	31.27+/-1.32	0	1219.56	2	610.786	#N/A	30.72	340520	200281	140239	4720	4720	0	#N/A	0.000771	VACV			FALSE
20221010_MS_zenoSWATH_DC24_VACV_53C_r1.wiff	53C_r1	SAPMNVDNLIM	11	C50H85N13O18S2	SAPMNVDNLIM[+16]	SAPMNVDNLIM(unimod:35)	SAPMNVDNLIM[Oxi]	SAPMNVDNLIM[Oxidation (M)]	0.9503	0.9889	#N/A	31.27+/-1.32	0	1219.56	2	610.786	#N/A	30.72	116907	71574	45332	1259	1259	0	#N/A	0.00022	VACV			FALSE
20221010_MS_zenoSWATH_DC24_VACV_53C_r2.wiff	53C_r2	SAPMNVDNLIM	11	C50H85N13O18S2	SAPMNVDNLIM[+16]	SAPMNVDNLIM(unimod:35)	SAPMNVDNLIM[Oxi]	SAPMNVDNLIM[Oxidation (M)]	0.9629	0.9935	#N/A	31.27+/-1.32	0	1219.56	2	610.786	#N/A	30.72	182893	108269	74624	1711	1711	0	#N/A	0.000439	VACV			FALSE
20221010_MS_zenoSWATH_DC24_VACV_53C_r3.wiff	53C_r3	SAPMNVDNLIM	11	C50H85N13O18S2	SAPMNVDNLIM[+16]	SAPMNVDNLIM(unimod:35)	SAPMNVDNLIM[Oxi]	SAPMNVDNLIM[Oxidation (M)]	0.9154	0.9802	#N/A	31.27+/-1.32	0	1219.56	2	610.786	#N/A	30.72	69272	41571	27700	418	418	0	#N/A	0.000237	VACV			FALSE
20221010_MS_zenoSWATH_DC24_VACV_57C_r1.wiff	57C_r1	SAPMNVDNLIM	11	C50H85N13O18S2	SAPMNVDNLIM[+16]	SAPMNVDNLIM(unimod:35)	SAPMNVDNLIM[Oxi]	SAPMNVDNLIM[Oxidation (M)]	0.8602	0.9838	#N/A	31.27+/-1.32	0	1219.56	2	610.786	#N/A	30.72	46863	29359	17504	1674	1674	0	#N/A	0.000185	VACV			FALSE
20221010_MS_zenoSWATH_DC24_VACV_57C_r2.wiff	57C_r2	SAPMNVDNLIM	11	C50H85N13O18S2	SAPMNVDNLIM[+16]	SAPMNVDNLIM(unimod:35)	SAPMNVDNLIM[Oxi]	SAPMNVDNLIM[Oxidation (M)]	0.87	0.9507	#N/A	31.27+/-1.32	0.0008	1219.56	2	610.786	#N/A	30.72	15760	10155	5604	132	132	0	#N/A	8.5e-05	VACV			FALSE
20221010_MS_zenoSWATH_DC24_VACV_57C_r3.wiff	57C_r3	SAPMNVDNLIM	11	C50H85N13O18S2	SAPMNVDNLIM[+16]	SAPMNVDNLIM(unimod:35)	SAPMNVDNLIM[Oxi]	SAPMNVDNLIM[Oxidation (M)]	0.8765	0.9858	#N/A	31.27+/-1.32	0	1219.56	2	610.786	#N/A	30.72	36514	25455	11059	220	220	0	#N/A	0.00015	VACV			FALSE
20221010_MS_zenoSWATH_DC24_VACV_61C_r1.wiff	61C_r1	SAPMNVDNLIM	11	C50H85N13O18S2	SAPMNVDNLIM[+16]	SAPMNVDNLIM(unimod:35)	SAPMNVDNLIM[Oxi]	SAPMNVDNLIM[Oxidation (M)]	0.7257	0.9065	#N/A	31.27+/-1.32	0.0111	1219.56	2	610.786	#N/A	30.72	13876	9054	4822	1204	528	676	#N/A	3.5e-05	VACV			FALSE
20221010_MS_zenoSWATH_DC24_VACV_61C_r2.wiff	61C_r2	SAPMNVDNLIM	11	C50H85N13O18S2	SAPMNVDNLIM[+16]	SAPMNVDNLIM(unimod:35)	SAPMNVDNLIM[Oxi]	SAPMNVDNLIM[Oxidation (M)]	0.7378	0.8415	#N/A	31.27+/-1.32	0.0095	1219.56	2	610.786	#N/A	30.72	8967	5508	3460	0	0	0	#N/A	2.7e-05	VACV			FALSE
20221010_MS_zenoSWATH_DC24_VACV_61C_r3.wiff	61C_r3	SAPMNVDNLIM	11	C50H85N13O18S2	SAPMNVDNLIM[+16]	SAPMNVDNLIM(unimod:35)	SAPMNVDNLIM[Oxi]	SAPMNVDNLIM[Oxidation (M)]	0.5195	0.7644	#N/A	31.27+/-1.32	0.1135	1219.56	2	610.786	#N/A	30.72	1505	593	913	266	266	0	#N/A	5e-06	VACV			FALSE
20221010_MS_zenoSWATH_DC24_VACV_65C_r1.wiff	65C_r1	SAPMNVDNLIM	11	C50H85N13O18S2	SAPMNVDNLIM[+16]	SAPMNVDNLIM(unimod:35)	SAPMNVDNLIM[Oxi]	SAPMNVDNLIM[Oxidation (M)]	0.4593	0.698	#N/A	31.27+/-1.32	0.225	1219.56	2	610.786	#N/A	30.72	2714	1333	1382	0	0	0	#N/A	9e-06	VACV			FALSE
20221010_MS_zenoSWATH_DC24_VACV_65C_r2.wiff	65C_r2	SAPMNVDNLIM	11	C50H85N13O18S2	SAPMNVDNLIM[+16]	SAPMNVDNLIM(unimod:35)	SAPMNVDNLIM[Oxi]	SAPMNVDNLIM[Oxidation (M)]	0.1599	0.807	#N/A	31.27+/-1.32	0.3997	1219.56	2	610.786	#N/A	30.72	899	799	100	0	0	0	#N/A	6e-06	VACV			FALSE
20221010_MS_zenoSWATH_DC24_VACV_65C_r3.wiff	65C_r3	SAPMNVDNLIM	11	C50H85N13O18S2	SAPMNVDNLIM[+16]	SAPMNVDNLIM(unimod:35)	SAPMNVDNLIM[Oxi]	SAPMNVDNLIM[Oxidation (M)]	0.4217	0.5312	#N/A	31.27+/-1.32	0.2675	1219.56	2	610.786	#N/A	30.72	691	326	365	0	0	0	#N/A	2e-06	VACV			FALSE
20221010_MS_zenoSWATH_DC24_VACV_69C_r1.wiff	69C_r1	SAPMNVDNLIM	11	C50H85N13O18S2	SAPMNVDNLIM[+16]	SAPMNVDNLIM(unimod:35)	SAPMNVDNLIM[Oxi]	SAPMNVDNLIM[Oxidation (M)]	0.4119	0.8324	#N/A	31.27+/-1.32	0.2651	1219.56	2	610.786	#N/A	30.72	797	379	418	0	0	0	#N/A	3e-06	VACV			FALSE
20221010_MS_zenoSWATH_DC24_VACV_69C_r2.wiff	69C_r2	SAPMNVDNLIM	11	C50H85N13O18S2	SAPMNVDNLIM[+16]	SAPMNVDNLIM(unimod:35)	SAPMNVDNLIM[Oxi]	SAPMNVDNLIM[Oxidation (M)]	0.6563	0.4699	#N/A	31.27+/-1.32	0.1583	1219.56	2	610.786	#N/A	30.72	749	340	409	0	0	0	#N/A	3e-06	VACV			FALSE
20221010_MS_zenoSWATH_DC24_VACV_69C_r3.wiff	69C_r3	SAPMNVDNLIM	11	C50H85N13O18S2	SAPMNVDNLIM[+16]	SAPMNVDNLIM(unimod:35)	SAPMNVDNLIM[Oxi]	SAPMNVDNLIM[Oxidation (M)]	0.4562	0.5078	#N/A	31.27+/-1.32	0.2473	1219.56	2	610.786	#N/A	30.72	954	43	911	0	0	0	#N/A	8e-06	VACV			FALSE
20221010_MS_zenoSWATH_DC24_VACV_73C_r1.wiff	73C_r1	SAPMNVDNLIM	11	C50H85N13O18S2	SAPMNVDNLIM[+16]	SAPMNVDNLIM(unimod:35)	SAPMNVDNLIM[Oxi]	SAPMNVDNLIM[Oxidation (M)]	0.429	0.5745	#N/A	31.27+/-1.32	0.3752	1219.56	2	610.786	#N/A	30.72	489	86	404	0	0	0	#N/A	3e-06	VACV			FALSE
20221010_MS_zenoSWATH_DC24_VACV_73C_r2.wiff	73C_r2	SAPMNVDNLIM	11	C50H85N13O18S2	SAPMNVDNLIM[+16]	SAPMNVDNLIM(unimod:35)	SAPMNVDNLIM[Oxi]	SAPMNVDNLIM[Oxidation (M)]	0.4985	0.8285	#N/A	31.27+/-1.32	0.1489	1219.56	2	610.786	#N/A	30.72	3913	1014	2900	0	0	0	#N/A	3.2e-05	VACV			FALSE
20221010_MS_zenoSWATH_DC24_VACV_73C_r3.wiff	73C_r3	SAPMNVDNLIM	11	C50H85N13O18S2	SAPMNVDNLIM[+16]	SAPMNVDNLIM(unimod:35)	SAPMNVDNLIM[Oxi]	SAPMNVDNLIM[Oxidation (M)]	0.6598	0.7098	#N/A	31.27+/-1.32	0.0257	1219.56	2	610.786	#N/A	30.72	10687	2036	8651	0	0	0	#N/A	4e-05	VACV			FALSE
20221010_MS_zenoSWATH_DC24_VACV_37C_r1.wiff	37C_r1	SAPMNVDNLIM	11	C50H85N13O19S2	SAPM[+16]NVDNLIM[+16]	SAPM(unimod:35)NVDNLIM(unimod:35)	SAPM[Oxi]NVDNLIM[Oxi]	SAPM[Oxidation (M)]NVDNLIM[Oxidation (M)]	0.9597	0.999	#N/A	25.19+/-0.94	0	1235.55	2	618.784	#N/A	24.82	4149600	2242577	1907024	35672	16955	18717	#N/A	0.004408	VACV			FALSE
20221010_MS_zenoSWATH_DC24_VACV_37C_r2.wiff	37C_r2	SAPMNVDNLIM	11	C50H85N13O19S2	SAPM[+16]NVDNLIM[+16]	SAPM(unimod:35)NVDNLIM(unimod:35)	SAPM[Oxi]NVDNLIM[Oxi]	SAPM[Oxidation (M)]NVDNLIM[Oxidation (M)]	0.9507	0.9948	#N/A	25.19+/-0.94	0	1235.55	2	618.784	#N/A	24.82	1105646	588206	517441	7998	4718	3280	#N/A	0.001736	VACV			FALSE
20221010_MS_zenoSWATH_DC24_VACV_37C_r3.wiff	37C_r3	SAPMNVDNLIM	11	C50H85N13O19S2	SAPM[+16]NVDNLIM[+16]	SAPM(unimod:35)NVDNLIM(unimod:35)	SAPM[Oxi]NVDNLIM[Oxi]	SAPM[Oxidation (M)]NVDNLIM[Oxidation (M)]	0.9581	0.9972	#N/A	25.19+/-0.94	0	1235.55	2	618.784	#N/A	24.82	3298075	1721356	1576719	9355	4339	5017	#N/A	0.004314	VACV			FALSE
20221010_MS_zenoSWATH_DC24_VACV_41C_r1.wiff	41C_r1	SAPMNVDNLIM	11	C50H85N13O19S2	SAPM[+16]NVDNLIM[+16]	SAPM(unimod:35)NVDNLIM(unimod:35)	SAPM[Oxi]NVDNLIM[Oxi]	SAPM[Oxidation (M)]NVDNLIM[Oxidation (M)]	0.9535	0.9992	#N/A	25.19+/-0.94	0	1235.55	2	618.784	#N/A	24.82	3978663	2173818	1804845	29834	16466	13368	#N/A	0.00485	VACV			FALSE
20221010_MS_zenoSWATH_DC24_VACV_41C_r2.wiff	41C_r2	SAPMNVDNLIM	11	C50H85N13O19S2	SAPM[+16]NVDNLIM[+16]	SAPM(unimod:35)NVDNLIM(unimod:35)	SAPM[Oxi]NVDNLIM[Oxi]	SAPM[Oxidation (M)]NVDNLIM[Oxidation (M)]	0.9564	0.9985	#N/A	25.19+/-0.94	0	1235.55	2	618.784	#N/A	24.82	3224010	1719377	1504633	5564	5161	403	#N/A	0.004622	VACV			FALSE
20221010_MS_zenoSWATH_DC24_VACV_41C_r3.wiff	41C_r3	SAPMNVDNLIM	11	C50H85N13O19S2	SAPM[+16]NVDNLIM[+16]	SAPM(unimod:35)NVDNLIM(unimod:35)	SAPM[Oxi]NVDNLIM[Oxi]	SAPM[Oxidation (M)]NVDNLIM[Oxidation (M)]	0.9558	0.9968	#N/A	25.19+/-0.94	0	1235.55	2	618.784	#N/A	24.82	3543362	1881793	1661569	23625	13849	9776	#N/A	0.005001	VACV			FALSE
20221010_MS_zenoSWATH_DC24_VACV_45C_r1.wiff	45C_r1	SAPMNVDNLIM	11	C50H85N13O19S2	SAPM[+16]NVDNLIM[+16]	SAPM(unimod:35)NVDNLIM(unimod:35)	SAPM[Oxi]NVDNLIM[Oxi]	SAPM[Oxidation (M)]NVDNLIM[Oxidation (M)]	0.9553	0.9971	#N/A	25.19+/-0.94	0	1235.55	2	618.784	#N/A	24.82	4640379	2524345	2116034	35840	15083	20757	#N/A	0.005075	VACV			FALSE
20221010_MS_zenoSWATH_DC24_VACV_45C_r2.wiff	45C_r2	SAPMNVDNLIM	11	C50H85N13O19S2	SAPM[+16]NVDNLIM[+16]	SAPM(unimod:35)NVDNLIM(unimod:35)	SAPM[Oxi]NVDNLIM[Oxi]	SAPM[Oxidation (M)]NVDNLIM[Oxidation (M)]	0.9562	0.9977	#N/A	25.19+/-0.94	0	1235.55	2	618.784	#N/A	24.82	2267704	1215350	1052354	14604	9016	5588	#N/A	0.003935	VACV			FALSE
20221010_MS_zenoSWATH_DC24_VACV_45C_r3.wiff	45C_r3	SAPMNVDNLIM	11	C50H85N13O19S2	SAPM[+16]NVDNLIM[+16]	SAPM(unimod:35)NVDNLIM(unimod:35)	SAPM[Oxi]NVDNLIM[Oxi]	SAPM[Oxidation (M)]NVDNLIM[Oxidation (M)]	0.959	0.9972	#N/A	25.19+/-0.94	0	1235.55	2	618.784	#N/A	24.82	4129389	2240299	1889089	13342	11488	1854	#N/A	0.004762	VACV			FALSE
20221010_MS_zenoSWATH_DC24_VACV_49C_r1.wiff	49C_r1	SAPMNVDNLIM	11	C50H85N13O19S2	SAPM[+16]NVDNLIM[+16]	SAPM(unimod:35)NVDNLIM(unimod:35)	SAPM[Oxi]NVDNLIM[Oxi]	SAPM[Oxidation (M)]NVDNLIM[Oxidation (M)]	0.9632	0.9966	#N/A	25.19+/-0.94	0	1235.55	2	618.784	#N/A	24.82	1372469	719150	653319	15177	8316	6861	#N/A	0.002887	VACV			FALSE
20221010_MS_zenoSWATH_DC24_VACV_49C_r2.wiff	49C_r2	SAPMNVDNLIM	11	C50H85N13O19S2	SAPM[+16]NVDNLIM[+16]	SAPM(unimod:35)NVDNLIM(unimod:35)	SAPM[Oxi]NVDNLIM[Oxi]	SAPM[Oxidation (M)]NVDNLIM[Oxidation (M)]	0.9528	0.9978	#N/A	25.19+/-0.94	0	1235.55	2	618.784	#N/A	24.82	2753699	1456315	1297385	9176	6190	2986	#N/A	0.004437	VACV			FALSE
20221010_MS_zenoSWATH_DC24_VACV_49C_r3.wiff	49C_r3	SAPMNVDNLIM	11	C50H85N13O19S2	SAPM[+16]NVDNLIM[+16]	SAPM(unimod:35)NVDNLIM(unimod:35)	SAPM[Oxi]NVDNLIM[Oxi]	SAPM[Oxidation (M)]NVDNLIM[Oxidation (M)]	0.9642	0.9975	#N/A	25.19+/-0.94	0	1235.55	2	618.784	#N/A	24.82	1783497	955124	828373	13554	8210	5344	#N/A	0.004039	VACV			FALSE
20221010_MS_zenoSWATH_DC24_VACV_53C_r1.wiff	53C_r1	SAPMNVDNLIM	11	C50H85N13O19S2	SAPM[+16]NVDNLIM[+16]	SAPM(unimod:35)NVDNLIM(unimod:35)	SAPM[Oxi]NVDNLIM[Oxi]	SAPM[Oxidation (M)]NVDNLIM[Oxidation (M)]	0.9618	0.9978	#N/A	25.19+/-0.94	0	1235.55	2	618.784	#N/A	24.82	1746660	917967	828693	4726	2671	2055	#N/A	0.003289	VACV			FALSE
20221010_MS_zenoSWATH_DC24_VACV_53C_r2.wiff	53C_r2	SAPMNVDNLIM	11	C50H85N13O19S2	SAPM[+16]NVDNLIM[+16]	SAPM(unimod:35)NVDNLIM(unimod:35)	SAPM[Oxi]NVDNLIM[Oxi]	SAPM[Oxidation (M)]NVDNLIM[Oxidation (M)]	0.958	0.9983	#N/A	25.19+/-0.94	0	1235.55	2	618.784	#N/A	24.82	1723134	927012	796122	4053	3014	1039	#N/A	0.004135	VACV			FALSE
20221010_MS_zenoSWATH_DC24_VACV_53C_r3.wiff	53C_r3	SAPMNVDNLIM	11	C50H85N13O19S2	SAPM[+16]NVDNLIM[+16]	SAPM(unimod:35)NVDNLIM(unimod:35)	SAPM[Oxi]NVDNLIM[Oxi]	SAPM[Oxidation (M)]NVDNLIM[Oxidation (M)]	0.9503	0.9966	#N/A	25.19+/-0.94	0	1235.55	2	618.784	#N/A	24.82	1142828	601250	541578	724	259	465	#N/A	0.003909	VACV			FALSE
20221010_MS_zenoSWATH_DC24_VACV_57C_r1.wiff	57C_r1	SAPMNVDNLIM	11	C50H85N13O19S2	SAPM[+16]NVDNLIM[+16]	SAPM(unimod:35)NVDNLIM(unimod:35)	SAPM[Oxi]NVDNLIM[Oxi]	SAPM[Oxidation (M)]NVDNLIM[Oxidation (M)]	0.8547	0.9851	#N/A	25.19+/-0.94	0	1235.55	2	618.784	#N/A	24.82	48351	25234	23117	227	227	0	#N/A	0.00019	VACV			FALSE
20221010_MS_zenoSWATH_DC24_VACV_57C_r2.wiff	57C_r2	SAPMNVDNLIM	11	C50H85N13O19S2	SAPM[+16]NVDNLIM[+16]	SAPM(unimod:35)NVDNLIM(unimod:35)	SAPM[Oxi]NVDNLIM[Oxi]	SAPM[Oxidation (M)]NVDNLIM[Oxidation (M)]	0.9073	0.9869	#N/A	25.19+/-0.94	0	1235.55	2	618.784	#N/A	24.82	107602	50559	57042	860	860	0	#N/A	0.000582	VACV			FALSE
20221010_MS_zenoSWATH_DC24_VACV_57C_r3.wiff	57C_r3	SAPMNVDNLIM	11	C50H85N13O19S2	SAPM[+16]NVDNLIM[+16]	SAPM(unimod:35)NVDNLIM(unimod:35)	SAPM[Oxi]NVDNLIM[Oxi]	SAPM[Oxidation (M)]NVDNLIM[Oxidation (M)]	0.9101	0.99	#N/A	25.19+/-0.94	0	1235.55	2	618.784	#N/A	24.82	56312	28429	27883	0	0	0	#N/A	0.000232	VACV			FALSE
20221010_MS_zenoSWATH_DC24_VACV_61C_r1.wiff	61C_r1	SAPMNVDNLIM	11	C50H85N13O19S2	SAPM[+16]NVDNLIM[+16]	SAPM(unimod:35)NVDNLIM(unimod:35)	SAPM[Oxi]NVDNLIM[Oxi]	SAPM[Oxidation (M)]NVDNLIM[Oxidation (M)]	0.9225	0.9798	#N/A	25.19+/-0.94	0.1081	1235.55	2	618.784	#N/A	24.82	18610	10920	7690	1782	0	1782	#N/A	4.7e-05	VACV			FALSE
20221010_MS_zenoSWATH_DC24_VACV_61C_r2.wiff	61C_r2	SAPMNVDNLIM	11	C50H85N13O19S2	SAPM[+16]NVDNLIM[+16]	SAPM(unimod:35)NVDNLIM(unimod:35)	SAPM[Oxi]NVDNLIM[Oxi]	SAPM[Oxidation (M)]NVDNLIM[Oxidation (M)]	0.9478	0.9648	#N/A	25.19+/-0.94	0.0001	1235.55	2	618.784	#N/A	24.82	24629	13599	11030	1904	214	1690	#N/A	7.4e-05	VACV			FALSE
20221010_MS_zenoSWATH_DC24_VACV_61C_r3.wiff	61C_r3	SAPMNVDNLIM	11	C50H85N13O19S2	SAPM[+16]NVDNLIM[+16]	SAPM(unimod:35)NVDNLIM(unimod:35)	SAPM[Oxi]NVDNLIM[Oxi]	SAPM[Oxidation (M)]NVDNLIM[Oxidation (M)]	0.7051	0.9967	#N/A	25.19+/-0.94	0.0884	1235.55	2	618.784	#N/A	24.82	7331	4006	3325	446	446	0	#N/A	2.5e-05	VACV			FALSE
20221010_MS_zenoSWATH_DC24_VACV_65C_r1.wiff	65C_r1	SAPMNVDNLIM	11	C50H85N13O19S2	SAPM[+16]NVDNLIM[+16]	SAPM(unimod:35)NVDNLIM(unimod:35)	SAPM[Oxi]NVDNLIM[Oxi]	SAPM[Oxidation (M)]NVDNLIM[Oxidation (M)]	0.7435	0.8774	#N/A	25.19+/-0.94	0.125	1235.55	2	618.784	#N/A	24.82	5955	2615	3340	128	128	0	#N/A	1.9e-05	VACV			FALSE
20221010_MS_zenoSWATH_DC24_VACV_65C_r2.wiff	65C_r2	SAPMNVDNLIM	11	C50H85N13O19S2	SAPM[+16]NVDNLIM[+16]	SAPM(unimod:35)NVDNLIM(unimod:35)	SAPM[Oxi]NVDNLIM[Oxi]	SAPM[Oxidation (M)]NVDNLIM[Oxidation (M)]	0.4222	0.9483	#N/A	25.19+/-0.94	0.24	1235.55	2	618.784	#N/A	24.82	2191	549	1641	0	0	0	#N/A	1.5e-05	VACV			FALSE
20221010_MS_zenoSWATH_DC24_VACV_65C_r3.wiff	65C_r3	SAPMNVDNLIM	11	C50H85N13O19S2	SAPM[+16]NVDNLIM[+16]	SAPM(unimod:35)NVDNLIM(unimod:35)	SAPM[Oxi]NVDNLIM[Oxi]	SAPM[Oxidation (M)]NVDNLIM[Oxidation (M)]	0.3567	0.7818	#N/A	25.19+/-0.94	0.2622	1235.55	2	618.784	#N/A	24.82	1598	357	1241	0	0	0	#N/A	5e-06	VACV			FALSE
20221010_MS_zenoSWATH_DC24_VACV_69C_r1.wiff	69C_r1	SAPMNVDNLIM	11	C50H85N13O19S2	SAPM[+16]NVDNLIM[+16]	SAPM(unimod:35)NVDNLIM(unimod:35)	SAPM[Oxi]NVDNLIM[Oxi]	SAPM[Oxidation (M)]NVDNLIM[Oxidation (M)]	0.4949	0.7904	#N/A	25.19+/-0.94	0.1655	1235.55	2	618.784	#N/A	24.82	1296	241	1054	14	14	0	#N/A	5e-06	VACV			FALSE
20221010_MS_zenoSWATH_DC24_VACV_69C_r2.wiff	69C_r2	SAPMNVDNLIM	11	C50H85N13O19S2	SAPM[+16]NVDNLIM[+16]	SAPM(unimod:35)NVDNLIM(unimod:35)	SAPM[Oxi]NVDNLIM[Oxi]	SAPM[Oxidation (M)]NVDNLIM[Oxidation (M)]	0.536	0.5149	#N/A	25.19+/-0.94	0.0977	1235.55	2	618.784	#N/A	24.82	614	192	422	212	212	0	#N/A	2e-06	VACV			FALSE
20221010_MS_zenoSWATH_DC24_VACV_69C_r3.wiff	69C_r3	SAPMNVDNLIM	11	C50H85N13O19S2	SAPM[+16]NVDNLIM[+16]	SAPM(unimod:35)NVDNLIM(unimod:35)	SAPM[Oxi]NVDNLIM[Oxi]	SAPM[Oxidation (M)]NVDNLIM[Oxidation (M)]	0.2986	0.8236	#N/A	25.19+/-0.94	0.2693	1235.55	2	618.784	#N/A	24.82	5331	590	4741	0	0	0	#N/A	4.6e-05	VACV			FALSE
20221010_MS_zenoSWATH_DC24_VACV_73C_r1.wiff	73C_r1	SAPMNVDNLIM	11	C50H85N13O19S2	SAPM[+16]NVDNLIM[+16]	SAPM(unimod:35)NVDNLIM(unimod:35)	SAPM[Oxi]NVDNLIM[Oxi]	SAPM[Oxidation (M)]NVDNLIM[Oxidation (M)]	0.2785	0.8152	#N/A	25.19+/-0.94	0.2741	1235.55	2	618.784	#N/A	24.82	890	291	599	0	0	0	#N/A	5e-06	VACV			FALSE
20221010_MS_zenoSWATH_DC24_VACV_73C_r2.wiff	73C_r2	SAPMNVDNLIM	11	C50H85N13O19S2	SAPM[+16]NVDNLIM[+16]	SAPM(unimod:35)NVDNLIM(unimod:35)	SAPM[Oxi]NVDNLIM[Oxi]	SAPM[Oxidation (M)]NVDNLIM[Oxidation (M)]	0.3027	0.5428	#N/A	25.19+/-0.94	0.3185	1235.55	2	618.784	#N/A	24.82	637	88	548	13	13	0	#N/A	5e-06	VACV			FALSE
20221010_MS_zenoSWATH_DC24_VACV_73C_r3.wiff	73C_r3	SAPMNVDNLIM	11	C50H85N13O19S2	SAPM[+16]NVDNLIM[+16]	SAPM(unimod:35)NVDNLIM(unimod:35)	SAPM[Oxi]NVDNLIM[Oxi]	SAPM[Oxidation (M)]NVDNLIM[Oxidation (M)]	0.5599	0.6151	#N/A	25.19+/-0.94	0.2668	1235.55	2	618.784	#N/A	24.82	1380	176	1204	50	50	0	#N/A	5e-06	VACV			FALSE
20221010_MS_zenoSWATH_DC24_VACV_37C_r1.wiff	37C_r1	SAPMNVDNLIM	11	C50H85N13O19S2	SAPM[+16]NVDNLIM[+16]	SAPM(unimod:35)NVDNLIM(unimod:35)	SAPM[Oxi]NVDNLIM[Oxi]	SAPM[Oxidation (M)]NVDNLIM[Oxidation (M)]	0.8055	0.9515	#N/A	25.19+/-0.97	0	1235.55	3	412.858	#N/A	24.82	83633	19666	63967	0	0	0	#N/A	8.9e-05	VACV			FALSE
20221010_MS_zenoSWATH_DC24_VACV_37C_r2.wiff	37C_r2	SAPMNVDNLIM	11	C50H85N13O19S2	SAPM[+16]NVDNLIM[+16]	SAPM(unimod:35)NVDNLIM(unimod:35)	SAPM[Oxi]NVDNLIM[Oxi]	SAPM[Oxidation (M)]NVDNLIM[Oxidation (M)]	0.7525	0.9497	#N/A	25.19+/-0.97	0	1235.55	3	412.858	#N/A	24.82	22362	4533	17828	0	0	0	#N/A	3.5e-05	VACV			FALSE
20221010_MS_zenoSWATH_DC24_VACV_37C_r3.wiff	37C_r3	SAPMNVDNLIM	11	C50H85N13O19S2	SAPM[+16]NVDNLIM[+16]	SAPM(unimod:35)NVDNLIM(unimod:35)	SAPM[Oxi]NVDNLIM[Oxi]	SAPM[Oxidation (M)]NVDNLIM[Oxidation (M)]	0.8	0.9503	#N/A	25.19+/-0.97	0	1235.55	3	412.858	#N/A	24.82	56654	11550	45104	0	0	0	#N/A	7.4e-05	VACV			FALSE
20221010_MS_zenoSWATH_DC24_VACV_41C_r1.wiff	41C_r1	SAPMNVDNLIM	11	C50H85N13O19S2	SAPM[+16]NVDNLIM[+16]	SAPM(unimod:35)NVDNLIM(unimod:35)	SAPM[Oxi]NVDNLIM[Oxi]	SAPM[Oxidation (M)]NVDNLIM[Oxidation (M)]	0.7869	0.9497	#N/A	25.19+/-0.97	0	1235.55	3	412.858	#N/A	24.82	79062	18141	60922	46	46	0	#N/A	9.6e-05	VACV			FALSE
20221010_MS_zenoSWATH_DC24_VACV_41C_r2.wiff	41C_r2	SAPMNVDNLIM	11	C50H85N13O19S2	SAPM[+16]NVDNLIM[+16]	SAPM(unimod:35)NVDNLIM(unimod:35)	SAPM[Oxi]NVDNLIM[Oxi]	SAPM[Oxidation (M)]NVDNLIM[Oxidation (M)]	0.7849	0.94	#N/A	25.19+/-0.97	0	1235.55	3	412.858	#N/A	24.82	71718	14714	57004	0	0	0	#N/A	0.000103	VACV			FALSE
20221010_MS_zenoSWATH_DC24_VACV_41C_r3.wiff	41C_r3	SAPMNVDNLIM	11	C50H85N13O19S2	SAPM[+16]NVDNLIM[+16]	SAPM(unimod:35)NVDNLIM(unimod:35)	SAPM[Oxi]NVDNLIM[Oxi]	SAPM[Oxidation (M)]NVDNLIM[Oxidation (M)]	0.7689	0.9327	#N/A	25.19+/-0.97	0	1235.55	3	412.858	#N/A	24.82	56696	13196	43500	0	0	0	#N/A	8e-05	VACV			FALSE
20221010_MS_zenoSWATH_DC24_VACV_45C_r1.wiff	45C_r1	SAPMNVDNLIM	11	C50H85N13O19S2	SAPM[+16]NVDNLIM[+16]	SAPM(unimod:35)NVDNLIM(unimod:35)	SAPM[Oxi]NVDNLIM[Oxi]	SAPM[Oxidation (M)]NVDNLIM[Oxidation (M)]	0.8067	0.9471	#N/A	25.19+/-0.97	0	1235.55	3	412.858	#N/A	24.82	94792	21571	73220	0	0	0	#N/A	0.000104	VACV			FALSE
20221010_MS_zenoSWATH_DC24_VACV_45C_r2.wiff	45C_r2	SAPMNVDNLIM	11	C50H85N13O19S2	SAPM[+16]NVDNLIM[+16]	SAPM(unimod:35)NVDNLIM(unimod:35)	SAPM[Oxi]NVDNLIM[Oxi]	SAPM[Oxidation (M)]NVDNLIM[Oxidation (M)]	0.8203	0.9068	#N/A	25.19+/-0.97	0	1235.55	3	412.858	#N/A	24.82	36813	9967	26846	0	0	0	#N/A	6.4e-05	VACV			FALSE
20221010_MS_zenoSWATH_DC24_VACV_45C_r3.wiff	45C_r3	SAPMNVDNLIM	11	C50H85N13O19S2	SAPM[+16]NVDNLIM[+16]	SAPM(unimod:35)NVDNLIM(unimod:35)	SAPM[Oxi]NVDNLIM[Oxi]	SAPM[Oxidation (M)]NVDNLIM[Oxidation (M)]	0.814	0.9606	#N/A	25.19+/-0.97	0	1235.55	3	412.858	#N/A	24.82	76709	20597	56112	0	0	0	#N/A	8.8e-05	VACV			FALSE
20221010_MS_zenoSWATH_DC24_VACV_49C_r1.wiff	49C_r1	SAPMNVDNLIM	11	C50H85N13O19S2	SAPM[+16]NVDNLIM[+16]	SAPM(unimod:35)NVDNLIM(unimod:35)	SAPM[Oxi]NVDNLIM[Oxi]	SAPM[Oxidation (M)]NVDNLIM[Oxidation (M)]	0.7864	0.8444	#N/A	25.19+/-0.97	0	1235.55	3	412.858	#N/A	24.82	25936	6894	19042	0	0	0	#N/A	5.5e-05	VACV			FALSE
20221010_MS_zenoSWATH_DC24_VACV_49C_r2.wiff	49C_r2	SAPMNVDNLIM	11	C50H85N13O19S2	SAPM[+16]NVDNLIM[+16]	SAPM(unimod:35)NVDNLIM(unimod:35)	SAPM[Oxi]NVDNLIM[Oxi]	SAPM[Oxidation (M)]NVDNLIM[Oxidation (M)]	0.7782	0.9275	#N/A	25.19+/-0.97	0	1235.55	3	412.858	#N/A	24.82	52764	13158	39606	0	0	0	#N/A	8.5e-05	VACV			FALSE
20221010_MS_zenoSWATH_DC24_VACV_49C_r3.wiff	49C_r3	SAPMNVDNLIM	11	C50H85N13O19S2	SAPM[+16]NVDNLIM[+16]	SAPM(unimod:35)NVDNLIM(unimod:35)	SAPM[Oxi]NVDNLIM[Oxi]	SAPM[Oxidation (M)]NVDNLIM[Oxidation (M)]	0.7989	0.9182	#N/A	25.19+/-0.97	0	1235.55	3	412.858	#N/A	24.82	32551	8220	24331	0	0	0	#N/A	7.4e-05	VACV			FALSE
20221010_MS_zenoSWATH_DC24_VACV_53C_r1.wiff	53C_r1	SAPMNVDNLIM	11	C50H85N13O19S2	SAPM[+16]NVDNLIM[+16]	SAPM(unimod:35)NVDNLIM(unimod:35)	SAPM[Oxi]NVDNLIM[Oxi]	SAPM[Oxidation (M)]NVDNLIM[Oxidation (M)]	0.7282	0.9132	#N/A	25.19+/-0.97	0	1235.55	3	412.858	#N/A	24.82	31074	7838	23237	0	0	0	#N/A	5.9e-05	VACV			FALSE
20221010_MS_zenoSWATH_DC24_VACV_53C_r2.wiff	53C_r2	SAPMNVDNLIM	11	C50H85N13O19S2	SAPM[+16]NVDNLIM[+16]	SAPM(unimod:35)NVDNLIM(unimod:35)	SAPM[Oxi]NVDNLIM[Oxi]	SAPM[Oxidation (M)]NVDNLIM[Oxidation (M)]	0.7832	0.8757	#N/A	25.19+/-0.97	0	1235.55	3	412.858	#N/A	24.82	29818	7325	22493	238	238	0	#N/A	7.2e-05	VACV			FALSE
20221010_MS_zenoSWATH_DC24_VACV_53C_r3.wiff	53C_r3	SAPMNVDNLIM	11	C50H85N13O19S2	SAPM[+16]NVDNLIM[+16]	SAPM(unimod:35)NVDNLIM(unimod:35)	SAPM[Oxi]NVDNLIM[Oxi]	SAPM[Oxidation (M)]NVDNLIM[Oxidation (M)]	0.739	0.867	#N/A	25.19+/-0.97	0	1235.55	3	412.858	#N/A	24.82	18856	5064	13791	0	0	0	#N/A	6.4e-05	VACV			FALSE
20221010_MS_zenoSWATH_DC24_VACV_57C_r1.wiff	57C_r1	SAPMNVDNLIM	11	C50H85N13O19S2	SAPM[+16]NVDNLIM[+16]	SAPM(unimod:35)NVDNLIM(unimod:35)	SAPM[Oxi]NVDNLIM[Oxi]	SAPM[Oxidation (M)]NVDNLIM[Oxidation (M)]	0.2513	0.6897	#N/A	25.19+/-0.97	0	1235.55	3	412.858	#N/A	24.82	953	781	172	0	0	0	#N/A	4e-06	VACV			FALSE
20221010_MS_zenoSWATH_DC24_VACV_57C_r2.wiff	57C_r2	SAPMNVDNLIM	11	C50H85N13O19S2	SAPM[+16]NVDNLIM[+16]	SAPM(unimod:35)NVDNLIM(unimod:35)	SAPM[Oxi]NVDNLIM[Oxi]	SAPM[Oxidation (M)]NVDNLIM[Oxidation (M)]	0.5587	0.7263	#N/A	25.19+/-0.97	0	1235.55	3	412.858	#N/A	24.82	1417	752	664	100	100	0	#N/A	8e-06	VACV			FALSE
20221010_MS_zenoSWATH_DC24_VACV_57C_r3.wiff	57C_r3	SAPMNVDNLIM	11	C50H85N13O19S2	SAPM[+16]NVDNLIM[+16]	SAPM(unimod:35)NVDNLIM(unimod:35)	SAPM[Oxi]NVDNLIM[Oxi]	SAPM[Oxidation (M)]NVDNLIM[Oxidation (M)]	0	0.763	#N/A	25.19+/-0.97	0	1235.55	3	412.858	#N/A	24.82	915	915	0	0	0	0	#N/A	4e-06	VACV			FALSE
20221010_MS_zenoSWATH_DC24_VACV_61C_r1.wiff	61C_r1	SAPMNVDNLIM	11	C50H85N13O19S2	SAPM[+16]NVDNLIM[+16]	SAPM(unimod:35)NVDNLIM(unimod:35)	SAPM[Oxi]NVDNLIM[Oxi]	SAPM[Oxidation (M)]NVDNLIM[Oxidation (M)]	0.3864	0.5993	#N/A	25.19+/-0.97	0.1081	1235.55	3	412.858	#N/A	24.82	528	199	329	0	0	0	#N/A	1e-06	VACV			FALSE
20221010_MS_zenoSWATH_DC24_VACV_61C_r2.wiff	61C_r2	SAPMNVDNLIM	11	C50H85N13O19S2	SAPM[+16]NVDNLIM[+16]	SAPM(unimod:35)NVDNLIM(unimod:35)	SAPM[Oxi]NVDNLIM[Oxi]	SAPM[Oxidation (M)]NVDNLIM[Oxidation (M)]	0.3826	0.6021	#N/A	25.19+/-0.97	0.0001	1235.55	3	412.858	#N/A	24.82	788	665	124	0	0	0	#N/A	2e-06	VACV			FALSE
20221010_MS_zenoSWATH_DC24_VACV_61C_r3.wiff	61C_r3	SAPMNVDNLIM	11	C50H85N13O19S2	SAPM[+16]NVDNLIM[+16]	SAPM(unimod:35)NVDNLIM(unimod:35)	SAPM[Oxi]NVDNLIM[Oxi]	SAPM[Oxidation (M)]NVDNLIM[Oxidation (M)]	0	0.3847	#N/A	25.19+/-0.97	0.0884	1235.55	3	412.858	#N/A	24.82	366	366	0	0	0	0	#N/A	1e-06	VACV			FALSE
20221010_MS_zenoSWATH_DC24_VACV_65C_r1.wiff	65C_r1	SAPMNVDNLIM	11	C50H85N13O19S2	SAPM[+16]NVDNLIM[+16]	SAPM(unimod:35)NVDNLIM(unimod:35)	SAPM[Oxi]NVDNLIM[Oxi]	SAPM[Oxidation (M)]NVDNLIM[Oxidation (M)]	0	0.6397	#N/A	25.19+/-0.97	0.125	1235.55	3	412.858	#N/A	24.82	244	244	0	0	0	0	#N/A	1e-06	VACV			FALSE
20221010_MS_zenoSWATH_DC24_VACV_65C_r2.wiff	65C_r2	SAPMNVDNLIM	11	C50H85N13O19S2	SAPM[+16]NVDNLIM[+16]	SAPM(unimod:35)NVDNLIM(unimod:35)	SAPM[Oxi]NVDNLIM[Oxi]	SAPM[Oxidation (M)]NVDNLIM[Oxidation (M)]	0	0.6522	#N/A	25.19+/-0.97	0.24	1235.55	3	412.858	#N/A	24.82	217	217	0	0	0	0	#N/A	1e-06	VACV			FALSE
20221010_MS_zenoSWATH_DC24_VACV_65C_r3.wiff	65C_r3	SAPMNVDNLIM	11	C50H85N13O19S2	SAPM[+16]NVDNLIM[+16]	SAPM(unimod:35)NVDNLIM(unimod:35)	SAPM[Oxi]NVDNLIM[Oxi]	SAPM[Oxidation (M)]NVDNLIM[Oxidation (M)]	0	0.6904	#N/A	25.19+/-0.97	0.2622	1235.55	3	412.858	#N/A	24.82	106	106	0	10	10	0	#N/A	0	VACV			FALSE
20221010_MS_zenoSWATH_DC24_VACV_69C_r1.wiff	69C_r1	SAPMNVDNLIM	11	C50H85N13O19S2	SAPM[+16]NVDNLIM[+16]	SAPM(unimod:35)NVDNLIM(unimod:35)	SAPM[Oxi]NVDNLIM[Oxi]	SAPM[Oxidation (M)]NVDNLIM[Oxidation (M)]	0	0.6039	#N/A	25.19+/-0.97	0.1655	1235.55	3	412.858	#N/A	24.82	184	184	0	0	0	0	#N/A	1e-06	VACV			FALSE
20221010_MS_zenoSWATH_DC24_VACV_69C_r2.wiff	69C_r2	SAPMNVDNLIM	11	C50H85N13O19S2	SAPM[+16]NVDNLIM[+16]	SAPM(unimod:35)NVDNLIM(unimod:35)	SAPM[Oxi]NVDNLIM[Oxi]	SAPM[Oxidation (M)]NVDNLIM[Oxidation (M)]	0.3049	0.5074	#N/A	25.19+/-0.97	0.0977	1235.55	3	412.858	#N/A	24.82	244	40	204	40	40	0	#N/A	1e-06	VACV			FALSE
20221010_MS_zenoSWATH_DC24_VACV_69C_r3.wiff	69C_r3	SAPMNVDNLIM	11	C50H85N13O19S2	SAPM[+16]NVDNLIM[+16]	SAPM(unimod:35)NVDNLIM(unimod:35)	SAPM[Oxi]NVDNLIM[Oxi]	SAPM[Oxidation (M)]NVDNLIM[Oxidation (M)]	0	0.695	#N/A	25.19+/-0.97	0.2693	1235.55	3	412.858	#N/A	24.82	323	323	0	0	0	0	#N/A	3e-06	VACV			FALSE
20221010_MS_zenoSWATH_DC24_VACV_73C_r1.wiff	73C_r1	SAPMNVDNLIM	11	C50H85N13O19S2	SAPM[+16]NVDNLIM[+16]	SAPM(unimod:35)NVDNLIM(unimod:35)	SAPM[Oxi]NVDNLIM[Oxi]	SAPM[Oxidation (M)]NVDNLIM[Oxidation (M)]	0	0.6206	#N/A	25.19+/-0.97	0.2741	1235.55	3	412.858	#N/A	24.82	145	145	0	0	0	0	#N/A	1e-06	VACV			FALSE
20221010_MS_zenoSWATH_DC24_VACV_73C_r2.wiff	73C_r2	SAPMNVDNLIM	11	C50H85N13O19S2	SAPM[+16]NVDNLIM[+16]	SAPM(unimod:35)NVDNLIM(unimod:35)	SAPM[Oxi]NVDNLIM[Oxi]	SAPM[Oxidation (M)]NVDNLIM[Oxidation (M)]	0	0.7331	#N/A	25.19+/-0.97	0.3185	1235.55	3	412.858	#N/A	24.82	39	39	0	0	0	0	#N/A	0	VACV			FALSE
20221010_MS_zenoSWATH_DC24_VACV_73C_r3.wiff	73C_r3	SAPMNVDNLIM	11	C50H85N13O19S2	SAPM[+16]NVDNLIM[+16]	SAPM(unimod:35)NVDNLIM(unimod:35)	SAPM[Oxi]NVDNLIM[Oxi]	SAPM[Oxidation (M)]NVDNLIM[Oxidation (M)]	0.2168	0.5165	#N/A	25.19+/-0.97	0.2668	1235.55	3	412.858	#N/A	24.82	122	43	79	57	57	0	#N/A	0	VACV			FALSE
20221010_MS_zenoSWATH_DC24_VACV_37C_r1.wiff	37C_r1	YSPSNHHILL	10	C54H81N15O15	YSPSNHHILL	YSPSNHHILL	YSPSNHHILL	YSPSNHHILL	0.9271	0.9944	#N/A	19.07+/-1.14	0	1179.6	2	590.809	#N/A	18.36	41449	17810	23639	63	63	0	#N/A	4.4e-05	VACV			FALSE
20221010_MS_zenoSWATH_DC24_VACV_37C_r2.wiff	37C_r2	YSPSNHHILL	10	C54H81N15O15	YSPSNHHILL	YSPSNHHILL	YSPSNHHILL	YSPSNHHILL	0.8645	0.9593	#N/A	19.07+/-1.14	0	1179.6	2	590.809	#N/A	18.36	23201	9616	13585	0	0	0	#N/A	3.6e-05	VACV			FALSE
20221010_MS_zenoSWATH_DC24_VACV_37C_r3.wiff	37C_r3	YSPSNHHILL	10	C54H81N15O15	YSPSNHHILL	YSPSNHHILL	YSPSNHHILL	YSPSNHHILL	0.8764	0.9885	#N/A	19.07+/-1.14	0.0003	1179.6	2	590.809	#N/A	18.36	33962	15253	18709	0	0	0	#N/A	4.4e-05	VACV			FALSE
20221010_MS_zenoSWATH_DC24_VACV_41C_r1.wiff	41C_r1	YSPSNHHILL	10	C54H81N15O15	YSPSNHHILL	YSPSNHHILL	YSPSNHHILL	YSPSNHHILL	0.9023	0.9833	#N/A	19.07+/-1.14	0	1179.6	2	590.809	#N/A	18.36	20127	9548	10579	0	0	0	#N/A	2.5e-05	VACV			FALSE
20221010_MS_zenoSWATH_DC24_VACV_41C_r2.wiff	41C_r2	YSPSNHHILL	10	C54H81N15O15	YSPSNHHILL	YSPSNHHILL	YSPSNHHILL	YSPSNHHILL	0.872	0.9744	#N/A	19.07+/-1.14	0	1179.6	2	590.809	#N/A	18.36	20597	8785	11812	0	0	0	#N/A	3e-05	VACV			FALSE
20221010_MS_zenoSWATH_DC24_VACV_41C_r3.wiff	41C_r3	YSPSNHHILL	10	C54H81N15O15	YSPSNHHILL	YSPSNHHILL	YSPSNHHILL	YSPSNHHILL	0.9087	0.9821	#N/A	19.07+/-1.14	0	1179.6	2	590.809	#N/A	18.36	32424	14376	18048	0	0	0	#N/A	4.6e-05	VACV			FALSE
20221010_MS_zenoSWATH_DC24_VACV_45C_r1.wiff	45C_r1	YSPSNHHILL	10	C54H81N15O15	YSPSNHHILL	YSPSNHHILL	YSPSNHHILL	YSPSNHHILL	0.9166	0.9773	#N/A	19.07+/-1.14	0	1179.6	2	590.809	#N/A	18.36	27151	11370	15781	0	0	0	#N/A	3e-05	VACV			FALSE
20221010_MS_zenoSWATH_DC24_VACV_45C_r2.wiff	45C_r2	YSPSNHHILL	10	C54H81N15O15	YSPSNHHILL	YSPSNHHILL	YSPSNHHILL	YSPSNHHILL	0.8644	0.943	#N/A	19.07+/-1.14	0	1179.6	2	590.809	#N/A	18.36	15433	8349	7084	0	0	0	#N/A	2.7e-05	VACV			FALSE
20221010_MS_zenoSWATH_DC24_VACV_45C_r3.wiff	45C_r3	YSPSNHHILL	10	C54H81N15O15	YSPSNHHILL	YSPSNHHILL	YSPSNHHILL	YSPSNHHILL	0.9039	0.9821	#N/A	19.07+/-1.14	0	1179.6	2	590.809	#N/A	18.36	31558	15221	16337	0	0	0	#N/A	3.6e-05	VACV			FALSE
20221010_MS_zenoSWATH_DC24_VACV_49C_r1.wiff	49C_r1	YSPSNHHILL	10	C54H81N15O15	YSPSNHHILL	YSPSNHHILL	YSPSNHHILL	YSPSNHHILL	0.6308	0.8983	#N/A	19.07+/-1.14	0.0665	1179.6	2	590.809	#N/A	18.36	2102	943	1160	203	84	118	#N/A	4e-06	VACV			FALSE
20221010_MS_zenoSWATH_DC24_VACV_49C_r2.wiff	49C_r2	YSPSNHHILL	10	C54H81N15O15	YSPSNHHILL	YSPSNHHILL	YSPSNHHILL	YSPSNHHILL	0.828	0.9909	#N/A	19.07+/-1.14	0.0008	1179.6	2	590.809	#N/A	18.36	15003	6875	8128	0	0	0	#N/A	2.4e-05	VACV			FALSE
20221010_MS_zenoSWATH_DC24_VACV_49C_r3.wiff	49C_r3	YSPSNHHILL	10	C54H81N15O15	YSPSNHHILL	YSPSNHHILL	YSPSNHHILL	YSPSNHHILL	0.8039	0.9572	#N/A	19.07+/-1.14	0.0147	1179.6	2	590.809	#N/A	18.36	5334	2346	2988	0	0	0	#N/A	1.2e-05	VACV			FALSE
20221010_MS_zenoSWATH_DC24_VACV_53C_r1.wiff	53C_r1	YSPSNHHILL	10	C54H81N15O15	YSPSNHHILL	YSPSNHHILL	YSPSNHHILL	YSPSNHHILL	0.8438	0.9752	#N/A	19.07+/-1.14	0.0003	1179.6	2	590.809	#N/A	18.36	14637	7121	7515	0	0	0	#N/A	2.8e-05	VACV			FALSE
20221010_MS_zenoSWATH_DC24_VACV_53C_r2.wiff	53C_r2	YSPSNHHILL	10	C54H81N15O15	YSPSNHHILL	YSPSNHHILL	YSPSNHHILL	YSPSNHHILL	0.6418	0.9381	#N/A	19.07+/-1.14	0.2473	1179.6	2	590.809	#N/A	18.36	2162	656	1506	0	0	0	#N/A	5e-06	VACV			FALSE
20221010_MS_zenoSWATH_DC24_VACV_53C_r3.wiff	53C_r3	YSPSNHHILL	10	C54H81N15O15	YSPSNHHILL	YSPSNHHILL	YSPSNHHILL	YSPSNHHILL	0.4377	0.919	#N/A	19.07+/-1.14	0.3995	1179.6	2	590.809	#N/A	18.36	1103	352	752	0	0	0	#N/A	4e-06	VACV			FALSE
20221010_MS_zenoSWATH_DC24_VACV_57C_r1.wiff	57C_r1	YSPSNHHILL	10	C54H81N15O15	YSPSNHHILL	YSPSNHHILL	YSPSNHHILL	YSPSNHHILL	0.5156	0.9201	#N/A	19.07+/-1.14	0.2671	1179.6	2	590.809	#N/A	18.36	1888	1265	623	0	0	0	#N/A	7e-06	VACV			FALSE
20221010_MS_zenoSWATH_DC24_VACV_57C_r2.wiff	57C_r2	YSPSNHHILL	10	C54H81N15O15	YSPSNHHILL	YSPSNHHILL	YSPSNHHILL	YSPSNHHILL	0.3901	0.969	#N/A	19.07+/-1.14	0.2731	1179.6	2	590.809	#N/A	18.36	1005	519	486	126	126	0	#N/A	5e-06	VACV			FALSE
20221010_MS_zenoSWATH_DC24_VACV_57C_r3.wiff	57C_r3	YSPSNHHILL	10	C54H81N15O15	YSPSNHHILL	YSPSNHHILL	YSPSNHHILL	YSPSNHHILL	0.5028	0.6349	#N/A	19.07+/-1.14	0.281	1179.6	2	590.809	#N/A	18.36	485	68	418	28	28	0	#N/A	2e-06	VACV			FALSE
20221010_MS_zenoSWATH_DC24_VACV_61C_r1.wiff	61C_r1	YSPSNHHILL	10	C54H81N15O15	YSPSNHHILL	YSPSNHHILL	YSPSNHHILL	YSPSNHHILL	0.3035	0.4775	#N/A	19.07+/-1.14	0.2208	1179.6	2	590.809	#N/A	18.36	2372	531	1841	0	0	0	#N/A	6e-06	VACV			FALSE
20221010_MS_zenoSWATH_DC24_VACV_61C_r2.wiff	61C_r2	YSPSNHHILL	10	C54H81N15O15	YSPSNHHILL	YSPSNHHILL	YSPSNHHILL	YSPSNHHILL	0.5536	0.4766	#N/A	19.07+/-1.14	0.2904	1179.6	2	590.809	#N/A	18.36	1126	456	670	194	0	194	#N/A	3e-06	VACV			FALSE
20221010_MS_zenoSWATH_DC24_VACV_61C_r3.wiff	61C_r3	YSPSNHHILL	10	C54H81N15O15	YSPSNHHILL	YSPSNHHILL	YSPSNHHILL	YSPSNHHILL	0.4106	0.7485	#N/A	19.07+/-1.14	0.2941	1179.6	2	590.809	#N/A	18.36	217	89	127	4	4	0	#N/A	1e-06	VACV			FALSE
20221010_MS_zenoSWATH_DC24_VACV_65C_r1.wiff	65C_r1	YSPSNHHILL	10	C54H81N15O15	YSPSNHHILL	YSPSNHHILL	YSPSNHHILL	YSPSNHHILL	0.3462	0.8816	#N/A	19.07+/-1.14	0.4041	1179.6	2	590.809	#N/A	18.36	1320	954	366	49	49	0	#N/A	4e-06	VACV			FALSE
20221010_MS_zenoSWATH_DC24_VACV_65C_r2.wiff	65C_r2	YSPSNHHILL	10	C54H81N15O15	YSPSNHHILL	YSPSNHHILL	YSPSNHHILL	YSPSNHHILL	0.2789	0.5146	#N/A	19.07+/-1.14	0.3177	1179.6	2	590.809	#N/A	18.36	480	9	471	0	0	0	#N/A	3e-06	VACV			FALSE
20221010_MS_zenoSWATH_DC24_VACV_65C_r3.wiff	65C_r3	YSPSNHHILL	10	C54H81N15O15	YSPSNHHILL	YSPSNHHILL	YSPSNHHILL	YSPSNHHILL	0.3781	0.7242	#N/A	19.07+/-1.14	0.395	1179.6	2	590.809	#N/A	18.36	2035	953	1083	277	277	0	#N/A	6e-06	VACV			FALSE
20221010_MS_zenoSWATH_DC24_VACV_69C_r1.wiff	69C_r1	YSPSNHHILL	10	C54H81N15O15	YSPSNHHILL	YSPSNHHILL	YSPSNHHILL	YSPSNHHILL	0.4451	0.4013	#N/A	19.07+/-1.14	0.2741	1179.6	2	590.809	#N/A	18.36	501	54	447	0	0	0	#N/A	2e-06	VACV			FALSE
20221010_MS_zenoSWATH_DC24_VACV_69C_r2.wiff	69C_r2	YSPSNHHILL	10	C54H81N15O15	YSPSNHHILL	YSPSNHHILL	YSPSNHHILL	YSPSNHHILL	0.6063	0.6939	#N/A	19.07+/-1.14	0.28	1179.6	2	590.809	#N/A	18.36	852	559	293	11	11	0	#N/A	3e-06	VACV			FALSE
20221010_MS_zenoSWATH_DC24_VACV_69C_r3.wiff	69C_r3	YSPSNHHILL	10	C54H81N15O15	YSPSNHHILL	YSPSNHHILL	YSPSNHHILL	YSPSNHHILL	0.4377	0.6021	#N/A	19.07+/-1.14	0.4184	1179.6	2	590.809	#N/A	18.36	368	86	282	0	0	0	#N/A	3e-06	VACV			FALSE
20221010_MS_zenoSWATH_DC24_VACV_73C_r1.wiff	73C_r1	YSPSNHHILL	10	C54H81N15O15	YSPSNHHILL	YSPSNHHILL	YSPSNHHILL	YSPSNHHILL	0.4377	0.5146	#N/A	19.07+/-1.14	0.3995	1179.6	2	590.809	#N/A	18.36	109	11	98	0	0	0	#N/A	1e-06	VACV			FALSE
20221010_MS_zenoSWATH_DC24_VACV_73C_r2.wiff	73C_r2	YSPSNHHILL	10	C54H81N15O15	YSPSNHHILL	YSPSNHHILL	YSPSNHHILL	YSPSNHHILL	0.4377	0.4013	#N/A	19.07+/-1.14	0.4035	1179.6	2	590.809	#N/A	18.36	169	71	98	0	0	0	#N/A	1e-06	VACV			FALSE
20221010_MS_zenoSWATH_DC24_VACV_73C_r3.wiff	73C_r3	YSPSNHHILL	10	C54H81N15O15	YSPSNHHILL	YSPSNHHILL	YSPSNHHILL	YSPSNHHILL	0.4033	0	#N/A	19.07+/-1.14	0.2818	1179.6	2	590.809	#N/A	18.36	193	0	193	0	0	0	#N/A	1e-06	VACV			FALSE
20221010_MS_zenoSWATH_DC24_VACV_37C_r1.wiff	37C_r1	NNIFRTNL	8	C43H70N14O13	NNIFRTNL	NNIFRTNL	NNIFRTNL	NNIFRTNL	0.5619	0.8048	#N/A	30.43+/-2.62	0.0274	990.525	2	496.27	#N/A	29.6	22405	6190	16215	0	0	0	#N/A	2.4e-05	VACV			FALSE
20221010_MS_zenoSWATH_DC24_VACV_37C_r2.wiff	37C_r2	NNIFRTNL	8	C43H70N14O13	NNIFRTNL	NNIFRTNL	NNIFRTNL	NNIFRTNL	0.3123	0.3264	#N/A	30.43+/-2.62	0.0598	990.525	2	496.27	#N/A	29.6	14166	233	13933	89	89	0	#N/A	2.2e-05	VACV			FALSE
20221010_MS_zenoSWATH_DC24_VACV_37C_r3.wiff	37C_r3	NNIFRTNL	8	C43H70N14O13	NNIFRTNL	NNIFRTNL	NNIFRTNL	NNIFRTNL	0.4819	0.7785	#N/A	30.43+/-2.62	0.0811	990.525	2	496.27	#N/A	29.6	18171	1911	16260	0	0	0	#N/A	2.4e-05	VACV			FALSE
20221010_MS_zenoSWATH_DC24_VACV_41C_r1.wiff	41C_r1	NNIFRTNL	8	C43H70N14O13	NNIFRTNL	NNIFRTNL	NNIFRTNL	NNIFRTNL	0.3762	0.7473	#N/A	30.43+/-2.62	0.0513	990.525	2	496.27	#N/A	29.6	11675	1333	10343	80	80	0	#N/A	1.4e-05	VACV			FALSE
20221010_MS_zenoSWATH_DC24_VACV_41C_r2.wiff	41C_r2	NNIFRTNL	8	C43H70N14O13	NNIFRTNL	NNIFRTNL	NNIFRTNL	NNIFRTNL	0.4847	0.6901	#N/A	30.43+/-2.62	0.0968	990.525	2	496.27	#N/A	29.6	8801	66	8736	0	0	0	#N/A	1.3e-05	VACV			FALSE
20221010_MS_zenoSWATH_DC24_VACV_41C_r3.wiff	41C_r3	NNIFRTNL	8	C43H70N14O13	NNIFRTNL	NNIFRTNL	NNIFRTNL	NNIFRTNL	0.2917	0.7237	#N/A	30.43+/-2.62	0.3015	990.525	2	496.27	#N/A	29.6	7200	746	6454	36	36	0	#N/A	1e-05	VACV			FALSE
20221010_MS_zenoSWATH_DC24_VACV_45C_r1.wiff	45C_r1	NNIFRTNL	8	C43H70N14O13	NNIFRTNL	NNIFRTNL	NNIFRTNL	NNIFRTNL	0.2007	0	#N/A	30.43+/-2.62	0.1729	990.525	2	496.27	#N/A	29.6	80070	0	80070	30411	0	30411	#N/A	8.8e-05	VACV			FALSE
20221010_MS_zenoSWATH_DC24_VACV_45C_r2.wiff	45C_r2	NNIFRTNL	8	C43H70N14O13	NNIFRTNL	NNIFRTNL	NNIFRTNL	NNIFRTNL	0.3417	0.4037	#N/A	30.43+/-2.62	0.078	990.525	2	496.27	#N/A	29.6	6734	401	6333	34	34	0	#N/A	1.2e-05	VACV			FALSE
20221010_MS_zenoSWATH_DC24_VACV_45C_r3.wiff	45C_r3	NNIFRTNL	8	C43H70N14O13	NNIFRTNL	NNIFRTNL	NNIFRTNL	NNIFRTNL	0.5017	0.7078	#N/A	30.43+/-2.62	0.0648	990.525	2	496.27	#N/A	29.6	9529	3141	6388	0	0	0	#N/A	1.1e-05	VACV			FALSE
20221010_MS_zenoSWATH_DC24_VACV_49C_r1.wiff	49C_r1	NNIFRTNL	8	C43H70N14O13	NNIFRTNL	NNIFRTNL	NNIFRTNL	NNIFRTNL	0.1684	0	#N/A	30.43+/-2.62	0.2848	990.525	2	496.27	#N/A	29.6	39942	0	39942	4964	0	4964	#N/A	8.4e-05	VACV			FALSE
20221010_MS_zenoSWATH_DC24_VACV_49C_r2.wiff	49C_r2	NNIFRTNL	8	C43H70N14O13	NNIFRTNL	NNIFRTNL	NNIFRTNL	NNIFRTNL	0.3216	0.8755	#N/A	30.43+/-2.62	0.0991	990.525	2	496.27	#N/A	29.6	5690	611	5079	0	0	0	#N/A	9e-06	VACV			FALSE
20221010_MS_zenoSWATH_DC24_VACV_49C_r3.wiff	49C_r3	NNIFRTNL	8	C43H70N14O13	NNIFRTNL	NNIFRTNL	NNIFRTNL	NNIFRTNL	0.4339	0.8838	#N/A	30.43+/-2.62	0.2254	990.525	2	496.27	#N/A	29.6	4928	3317	1610	24	24	0	#N/A	1.1e-05	VACV			FALSE
20221010_MS_zenoSWATH_DC24_VACV_53C_r1.wiff	53C_r1	NNIFRTNL	8	C43H70N14O13	NNIFRTNL	NNIFRTNL	NNIFRTNL	NNIFRTNL	0.279	0.6534	#N/A	30.43+/-2.62	0.2407	990.525	2	496.27	#N/A	29.6	3902	1079	2823	63	63	0	#N/A	7e-06	VACV			FALSE
20221010_MS_zenoSWATH_DC24_VACV_53C_r2.wiff	53C_r2	NNIFRTNL	8	C43H70N14O13	NNIFRTNL	NNIFRTNL	NNIFRTNL	NNIFRTNL	0.1623	0.2035	#N/A	30.43+/-2.62	0.3995	990.525	2	496.27	#N/A	29.6	51112	168	50944	2069	0	2069	#N/A	0.000123	VACV			FALSE
20221010_MS_zenoSWATH_DC24_VACV_53C_r3.wiff	53C_r3	NNIFRTNL	8	C43H70N14O13	NNIFRTNL	NNIFRTNL	NNIFRTNL	NNIFRTNL	0.1705	0.2839	#N/A	30.43+/-2.62	0.3057	990.525	2	496.27	#N/A	29.6	130284	391	129893	0	0	0	#N/A	0.000446	VACV			FALSE
20221010_MS_zenoSWATH_DC24_VACV_57C_r1.wiff	57C_r1	NNIFRTNL	8	C43H70N14O13	NNIFRTNL	NNIFRTNL	NNIFRTNL	NNIFRTNL	0.5174	0.3391	#N/A	30.43+/-2.62	0.2155	990.525	2	496.27	#N/A	29.6	4980	1979	3001	50	50	0	#N/A	2e-05	VACV			FALSE
20221010_MS_zenoSWATH_DC24_VACV_57C_r2.wiff	57C_r2	NNIFRTNL	8	C43H70N14O13	NNIFRTNL	NNIFRTNL	NNIFRTNL	NNIFRTNL	0.2047	0.6377	#N/A	30.43+/-2.62	0.2789	990.525	2	496.27	#N/A	29.6	7052	2842	4210	116	116	0	#N/A	3.8e-05	VACV			FALSE
20221010_MS_zenoSWATH_DC24_VACV_57C_r3.wiff	57C_r3	NNIFRTNL	8	C43H70N14O13	NNIFRTNL	NNIFRTNL	NNIFRTNL	NNIFRTNL	0.5583	0.4706	#N/A	30.43+/-2.62	0.2769	990.525	2	496.27	#N/A	29.6	1224	235	988	995	590	404	#N/A	5e-06	VACV			FALSE
20221010_MS_zenoSWATH_DC24_VACV_61C_r1.wiff	61C_r1	NNIFRTNL	8	C43H70N14O13	NNIFRTNL	NNIFRTNL	NNIFRTNL	NNIFRTNL	0.4254	0.9419	#N/A	30.43+/-2.62	0.0055	990.525	2	496.27	#N/A	29.6	31879	14327	17552	0	0	0	#N/A	8.1e-05	VACV			FALSE
20221010_MS_zenoSWATH_DC24_VACV_61C_r2.wiff	61C_r2	NNIFRTNL	8	C43H70N14O13	NNIFRTNL	NNIFRTNL	NNIFRTNL	NNIFRTNL	0.5618	0.9372	#N/A	30.43+/-2.62	0.1	990.525	2	496.27	#N/A	29.6	24368	10433	13935	1641	1641	0	#N/A	7.3e-05	VACV			FALSE
20221010_MS_zenoSWATH_DC24_VACV_61C_r3.wiff	61C_r3	NNIFRTNL	8	C43H70N14O13	NNIFRTNL	NNIFRTNL	NNIFRTNL	NNIFRTNL	0.4371	0.9259	#N/A	30.43+/-2.62	0.003	990.525	2	496.27	#N/A	29.6	32748	11602	21146	413	0	413	#N/A	0.000111	VACV			FALSE
20221010_MS_zenoSWATH_DC24_VACV_65C_r1.wiff	65C_r1	NNIFRTNL	8	C43H70N14O13	NNIFRTNL	NNIFRTNL	NNIFRTNL	NNIFRTNL	0.6298	0.8163	#N/A	30.43+/-2.62	0.1286	990.525	2	496.27	#N/A	29.6	7932	5149	2784	0	0	0	#N/A	2.6e-05	VACV			FALSE
20221010_MS_zenoSWATH_DC24_VACV_65C_r2.wiff	65C_r2	NNIFRTNL	8	C43H70N14O13	NNIFRTNL	NNIFRTNL	NNIFRTNL	NNIFRTNL	0.1727	0.6675	#N/A	30.43+/-2.62	0.3063	990.525	2	496.27	#N/A	29.6	14295	193	14103	1351	1351	0	#N/A	9.8e-05	VACV			FALSE
20221010_MS_zenoSWATH_DC24_VACV_65C_r3.wiff	65C_r3	NNIFRTNL	8	C43H70N14O13	NNIFRTNL	NNIFRTNL	NNIFRTNL	NNIFRTNL	0.1927	0.4063	#N/A	30.43+/-2.62	0.3212	990.525	2	496.27	#N/A	29.6	78668	859	77809	0	0	0	#N/A	0.000246	VACV			FALSE
20221010_MS_zenoSWATH_DC24_VACV_69C_r1.wiff	69C_r1	NNIFRTNL	8	C43H70N14O13	NNIFRTNL	NNIFRTNL	NNIFRTNL	NNIFRTNL	0.3249	0.5935	#N/A	30.43+/-2.62	0.2005	990.525	2	496.27	#N/A	29.6	3383	640	2743	697	697	0	#N/A	1.3e-05	VACV			FALSE
20221010_MS_zenoSWATH_DC24_VACV_69C_r2.wiff	69C_r2	NNIFRTNL	8	C43H70N14O13	NNIFRTNL	NNIFRTNL	NNIFRTNL	NNIFRTNL	0.5532	0.4901	#N/A	30.43+/-2.62	0.2376	990.525	2	496.27	#N/A	29.6	3427	1710	1717	323	323	0	#N/A	1.3e-05	VACV			FALSE
20221010_MS_zenoSWATH_DC24_VACV_69C_r3.wiff	69C_r3	NNIFRTNL	8	C43H70N14O13	NNIFRTNL	NNIFRTNL	NNIFRTNL	NNIFRTNL	0.1802	0.6637	#N/A	30.43+/-2.62	0.2612	990.525	2	496.27	#N/A	29.6	20372	1241	19131	236	236	0	#N/A	0.000176	VACV			FALSE
20221010_MS_zenoSWATH_DC24_VACV_73C_r1.wiff	73C_r1	NNIFRTNL	8	C43H70N14O13	NNIFRTNL	NNIFRTNL	NNIFRTNL	NNIFRTNL	0.1701	0.6503	#N/A	30.43+/-2.62	0.3565	990.525	2	496.27	#N/A	29.6	9665	221	9443	81	81	0	#N/A	5.9e-05	VACV			FALSE
20221010_MS_zenoSWATH_DC24_VACV_73C_r2.wiff	73C_r2	NNIFRTNL	8	C43H70N14O13	NNIFRTNL	NNIFRTNL	NNIFRTNL	NNIFRTNL	0.5533	0.6622	#N/A	30.43+/-2.62	0.2755	990.525	2	496.27	#N/A	29.6	2026	921	1105	231	231	0	#N/A	1.6e-05	VACV			FALSE
20221010_MS_zenoSWATH_DC24_VACV_73C_r3.wiff	73C_r3	NNIFRTNL	8	C43H70N14O13	NNIFRTNL	NNIFRTNL	NNIFRTNL	NNIFRTNL	0.6249	0.76	#N/A	30.43+/-2.62	0.0023	990.525	2	496.27	#N/A	29.6	3102	843	2259	546	546	0	#N/A	1.1e-05	VACV			FALSE
20221010_MS_zenoSWATH_DC24_VACV_37C_r1.wiff	37C_r1	LSYIYNML	8	C48H73N9O13S	LSYIYNML	LSYIYNML	LSYIYNML	LSYIYNML	0.9548	0.9492	#N/A	38.01+/-1.13	0	1015.5	2	508.76	#N/A	38.33	42690	18940	23750	0	0	0	#N/A	4.5e-05	VACV			FALSE
20221010_MS_zenoSWATH_DC24_VACV_37C_r2.wiff	37C_r2	LSYIYNML	8	C48H73N9O13S	LSYIYNML	LSYIYNML	LSYIYNML	LSYIYNML	0.9686	0.9905	#N/A	38.01+/-1.13	0	1015.5	2	508.76	#N/A	38.33	219423	84298	135125	773	773	0	#N/A	0.000345	VACV			FALSE
20221010_MS_zenoSWATH_DC24_VACV_37C_r3.wiff	37C_r3	LSYIYNML	8	C48H73N9O13S	LSYIYNML	LSYIYNML	LSYIYNML	LSYIYNML	0.9277	0.9691	#N/A	38.01+/-1.13	0	1015.5	2	508.76	#N/A	38.33	54553	22130	32424	22	22	0	#N/A	7.1e-05	VACV			FALSE
20221010_MS_zenoSWATH_DC24_VACV_41C_r1.wiff	41C_r1	LSYIYNML	8	C48H73N9O13S	LSYIYNML	LSYIYNML	LSYIYNML	LSYIYNML	0.9589	0.9814	#N/A	38.01+/-1.13	0	1015.5	2	508.76	#N/A	38.33	136656	59018	77638	265	265	0	#N/A	0.000167	VACV			FALSE
20221010_MS_zenoSWATH_DC24_VACV_41C_r2.wiff	41C_r2	LSYIYNML	8	C48H73N9O13S	LSYIYNML	LSYIYNML	LSYIYNML	LSYIYNML	0.948	0.9798	#N/A	38.01+/-1.13	0	1015.5	2	508.76	#N/A	38.33	127183	54392	72791	53	53	0	#N/A	0.000182	VACV			FALSE
20221010_MS_zenoSWATH_DC24_VACV_41C_r3.wiff	41C_r3	LSYIYNML	8	C48H73N9O13S	LSYIYNML	LSYIYNML	LSYIYNML	LSYIYNML	0.9483	0.9761	#N/A	38.01+/-1.13	0	1015.5	2	508.76	#N/A	38.33	81732	32941	48791	0	0	0	#N/A	0.000115	VACV			FALSE
20221010_MS_zenoSWATH_DC24_VACV_45C_r1.wiff	45C_r1	LSYIYNML	8	C48H73N9O13S	LSYIYNML	LSYIYNML	LSYIYNML	LSYIYNML	0.9546	0.9706	#N/A	38.01+/-1.13	0	1015.5	2	508.76	#N/A	38.33	96452	37264	59188	0	0	0	#N/A	0.000105	VACV			FALSE
20221010_MS_zenoSWATH_DC24_VACV_45C_r2.wiff	45C_r2	LSYIYNML	8	C48H73N9O13S	LSYIYNML	LSYIYNML	LSYIYNML	LSYIYNML	0.9334	0.9726	#N/A	38.01+/-1.13	0	1015.5	2	508.76	#N/A	38.33	87984	38320	49664	0	0	0	#N/A	0.000153	VACV			FALSE
20221010_MS_zenoSWATH_DC24_VACV_45C_r3.wiff	45C_r3	LSYIYNML	8	C48H73N9O13S	LSYIYNML	LSYIYNML	LSYIYNML	LSYIYNML	0.96	0.9761	#N/A	38.01+/-1.13	0	1015.5	2	508.76	#N/A	38.33	99142	41612	57530	0	0	0	#N/A	0.000114	VACV			FALSE
20221010_MS_zenoSWATH_DC24_VACV_49C_r1.wiff	49C_r1	LSYIYNML	8	C48H73N9O13S	LSYIYNML	LSYIYNML	LSYIYNML	LSYIYNML	0.9383	0.9789	#N/A	38.01+/-1.13	0	1015.5	2	508.76	#N/A	38.33	143698	60821	82877	0	0	0	#N/A	0.000302	VACV			FALSE
20221010_MS_zenoSWATH_DC24_VACV_49C_r2.wiff	49C_r2	LSYIYNML	8	C48H73N9O13S	LSYIYNML	LSYIYNML	LSYIYNML	LSYIYNML	0.9546	0.9565	#N/A	38.01+/-1.13	0	1015.5	2	508.76	#N/A	38.33	77385	32605	44780	0	0	0	#N/A	0.000125	VACV			FALSE
20221010_MS_zenoSWATH_DC24_VACV_49C_r3.wiff	49C_r3	LSYIYNML	8	C48H73N9O13S	LSYIYNML	LSYIYNML	LSYIYNML	LSYIYNML	0.9584	0.9875	#N/A	38.01+/-1.13	0	1015.5	2	508.76	#N/A	38.33	84452	32472	51981	0	0	0	#N/A	0.000191	VACV			FALSE
20221010_MS_zenoSWATH_DC24_VACV_53C_r1.wiff	53C_r1	LSYIYNML	8	C48H73N9O13S	LSYIYNML	LSYIYNML	LSYIYNML	LSYIYNML	0.9027	0.9664	#N/A	38.01+/-1.13	0	1015.5	2	508.76	#N/A	38.33	36856	15691	21165	515	515	0	#N/A	6.9e-05	VACV			FALSE
20221010_MS_zenoSWATH_DC24_VACV_53C_r2.wiff	53C_r2	LSYIYNML	8	C48H73N9O13S	LSYIYNML	LSYIYNML	LSYIYNML	LSYIYNML	0.9409	0.9519	#N/A	38.01+/-1.13	0	1015.5	2	508.76	#N/A	38.33	47918	19902	28016	0	0	0	#N/A	0.000115	VACV			FALSE
20221010_MS_zenoSWATH_DC24_VACV_53C_r3.wiff	53C_r3	LSYIYNML	8	C48H73N9O13S	LSYIYNML	LSYIYNML	LSYIYNML	LSYIYNML	0.8645	0.9492	#N/A	38.01+/-1.13	0.0035	1015.5	2	508.76	#N/A	38.33	23467	9999	13469	0	0	0	#N/A	8e-05	VACV			FALSE
20221010_MS_zenoSWATH_DC24_VACV_57C_r1.wiff	57C_r1	LSYIYNML	8	C48H73N9O13S	LSYIYNML	LSYIYNML	LSYIYNML	LSYIYNML	0.9407	0.8892	#N/A	38.01+/-1.13	0.001	1015.5	2	508.76	#N/A	38.33	22518	12101	10417	0	0	0	#N/A	8.9e-05	VACV			FALSE
20221010_MS_zenoSWATH_DC24_VACV_57C_r2.wiff	57C_r2	LSYIYNML	8	C48H73N9O13S	LSYIYNML	LSYIYNML	LSYIYNML	LSYIYNML	0.7467	0.7425	#N/A	38.01+/-1.13	0.0115	1015.5	2	508.76	#N/A	38.33	3796	2460	1337	0	0	0	#N/A	2.1e-05	VACV			FALSE
20221010_MS_zenoSWATH_DC24_VACV_57C_r3.wiff	57C_r3	LSYIYNML	8	C48H73N9O13S	LSYIYNML	LSYIYNML	LSYIYNML	LSYIYNML	0.7511	0.81	#N/A	38.01+/-1.13	0.0105	1015.5	2	508.76	#N/A	38.33	12325	7093	5232	194	194	0	#N/A	5.1e-05	VACV			FALSE
20221010_MS_zenoSWATH_DC24_VACV_61C_r1.wiff	61C_r1	LSYIYNML	8	C48H73N9O13S	LSYIYNML	LSYIYNML	LSYIYNML	LSYIYNML	0.7334	0.8358	#N/A	38.01+/-1.13	0.04	1015.5	2	508.76	#N/A	38.33	3792	2402	1390	2242	2167	75	#N/A	1e-05	VACV			FALSE
20221010_MS_zenoSWATH_DC24_VACV_61C_r2.wiff	61C_r2	LSYIYNML	8	C48H73N9O13S	LSYIYNML	LSYIYNML	LSYIYNML	LSYIYNML	0.3428	0.8802	#N/A	38.01+/-1.13	0.1051	1015.5	2	508.76	#N/A	38.33	2903	905	1998	1875	1875	0	#N/A	9e-06	VACV			FALSE
20221010_MS_zenoSWATH_DC24_VACV_61C_r3.wiff	61C_r3	LSYIYNML	8	C48H73N9O13S	LSYIYNML	LSYIYNML	LSYIYNML	LSYIYNML	0.4767	0.4534	#N/A	38.01+/-1.13	0.1489	1015.5	2	508.76	#N/A	38.33	2683	1508	1175	16	16	0	#N/A	9e-06	VACV			FALSE
20221010_MS_zenoSWATH_DC24_VACV_65C_r1.wiff	65C_r1	LSYIYNML	8	C48H73N9O13S	LSYIYNML	LSYIYNML	LSYIYNML	LSYIYNML	0.341	0.6142	#N/A	38.01+/-1.13	0.1799	1015.5	2	508.76	#N/A	38.33	8438	4672	3766	0	0	0	#N/A	2.8e-05	VACV			FALSE
20221010_MS_zenoSWATH_DC24_VACV_65C_r2.wiff	65C_r2	LSYIYNML	8	C48H73N9O13S	LSYIYNML	LSYIYNML	LSYIYNML	LSYIYNML	0.3068	0.4972	#N/A	38.01+/-1.13	0.374	1015.5	2	508.76	#N/A	38.33	1610	1094	515	53	53	0	#N/A	1.1e-05	VACV			FALSE
20221010_MS_zenoSWATH_DC24_VACV_65C_r3.wiff	65C_r3	LSYIYNML	8	C48H73N9O13S	LSYIYNML	LSYIYNML	LSYIYNML	LSYIYNML	0.2967	0.6483	#N/A	38.01+/-1.13	0.2963	1015.5	2	508.76	#N/A	38.33	2421	1923	498	56	56	0	#N/A	8e-06	VACV			FALSE
20221010_MS_zenoSWATH_DC24_VACV_69C_r1.wiff	69C_r1	LSYIYNML	8	C48H73N9O13S	LSYIYNML	LSYIYNML	LSYIYNML	LSYIYNML	0.3793	0.5726	#N/A	38.01+/-1.13	0.2432	1015.5	2	508.76	#N/A	38.33	3467	3195	272	1535	1535	0	#N/A	1.4e-05	VACV			FALSE
20221010_MS_zenoSWATH_DC24_VACV_69C_r2.wiff	69C_r2	LSYIYNML	8	C48H73N9O13S	LSYIYNML	LSYIYNML	LSYIYNML	LSYIYNML	0.2924	0.7039	#N/A	38.01+/-1.13	0.2685	1015.5	2	508.76	#N/A	38.33	1427	1244	183	970	970	0	#N/A	5e-06	VACV			FALSE
20221010_MS_zenoSWATH_DC24_VACV_69C_r3.wiff	69C_r3	LSYIYNML	8	C48H73N9O13S	LSYIYNML	LSYIYNML	LSYIYNML	LSYIYNML	0.2259	0.7599	#N/A	38.01+/-1.13	0.3995	1015.5	2	508.76	#N/A	38.33	864	704	159	1588	1588	0	#N/A	7e-06	VACV			FALSE
20221010_MS_zenoSWATH_DC24_VACV_73C_r1.wiff	73C_r1	LSYIYNML	8	C48H73N9O13S	LSYIYNML	LSYIYNML	LSYIYNML	LSYIYNML	0.3069	0.6118	#N/A	38.01+/-1.13	0.3306	1015.5	2	508.76	#N/A	38.33	3329	2851	478	187	187	0	#N/A	2e-05	VACV			FALSE
20221010_MS_zenoSWATH_DC24_VACV_73C_r2.wiff	73C_r2	LSYIYNML	8	C48H73N9O13S	LSYIYNML	LSYIYNML	LSYIYNML	LSYIYNML	0.434	0.8233	#N/A	38.01+/-1.13	0.3187	1015.5	2	508.76	#N/A	38.33	1316	549	767	548	548	0	#N/A	1.1e-05	VACV			FALSE
20221010_MS_zenoSWATH_DC24_VACV_73C_r3.wiff	73C_r3	LSYIYNML	8	C48H73N9O13S	LSYIYNML	LSYIYNML	LSYIYNML	LSYIYNML	0.605	0.7632	#N/A	38.01+/-1.13	0.0816	1015.5	2	508.76	#N/A	38.33	6142	2124	4018	589	589	0	#N/A	2.3e-05	VACV			FALSE
20221010_MS_zenoSWATH_DC24_VACV_37C_r1.wiff	37C_r1	LSYIYNML	8	C48H73N9O14S	LSYIYNM[+16]L	LSYIYNM(unimod:35)L	LSYIYNM[Oxi]L	LSYIYNM[Oxidation (M)]L	0.9306	0.9839	#N/A	31.53+/-1.02	0	1031.5	2	516.757	#N/A	31.37	775239	316259	458980	2303	50	2253	#N/A	0.000824	VACV			FALSE
20221010_MS_zenoSWATH_DC24_VACV_37C_r2.wiff	37C_r2	LSYIYNML	8	C48H73N9O14S	LSYIYNM[+16]L	LSYIYNM(unimod:35)L	LSYIYNM[Oxi]L	LSYIYNM[Oxidation (M)]L	0.9266	0.9909	#N/A	31.53+/-1.02	0	1031.5	2	516.757	#N/A	31.37	340839	141067	199773	0	0	0	#N/A	0.000535	VACV			FALSE
20221010_MS_zenoSWATH_DC24_VACV_37C_r3.wiff	37C_r3	LSYIYNML	8	C48H73N9O14S	LSYIYNM[+16]L	LSYIYNM(unimod:35)L	LSYIYNM[Oxi]L	LSYIYNM[Oxidation (M)]L	0.9319	0.986	#N/A	31.53+/-1.02	0	1031.5	2	516.757	#N/A	31.37	631850	260478	371372	522	522	0	#N/A	0.000827	VACV			FALSE
20221010_MS_zenoSWATH_DC24_VACV_41C_r1.wiff	41C_r1	LSYIYNML	8	C48H73N9O14S	LSYIYNM[+16]L	LSYIYNM(unimod:35)L	LSYIYNM[Oxi]L	LSYIYNM[Oxidation (M)]L	0.9277	0.983	#N/A	31.53+/-1.02	0	1031.5	2	516.757	#N/A	31.37	582182	231418	350764	3047	3047	0	#N/A	0.00071	VACV			FALSE
20221010_MS_zenoSWATH_DC24_VACV_41C_r2.wiff	41C_r2	LSYIYNML	8	C48H73N9O14S	LSYIYNM[+16]L	LSYIYNM(unimod:35)L	LSYIYNM[Oxi]L	LSYIYNM[Oxidation (M)]L	0.9462	0.9829	#N/A	31.53+/-1.02	0	1031.5	2	516.757	#N/A	31.37	522218	214608	307610	269	269	0	#N/A	0.000749	VACV			FALSE
20221010_MS_zenoSWATH_DC24_VACV_41C_r3.wiff	41C_r3	LSYIYNML	8	C48H73N9O14S	LSYIYNM[+16]L	LSYIYNM(unimod:35)L	LSYIYNM[Oxi]L	LSYIYNM[Oxidation (M)]L	0.916	0.9849	#N/A	31.53+/-1.02	0	1031.5	2	516.757	#N/A	31.37	453275	176986	276290	0	0	0	#N/A	0.00064	VACV			FALSE
20221010_MS_zenoSWATH_DC24_VACV_45C_r1.wiff	45C_r1	LSYIYNML	8	C48H73N9O14S	LSYIYNM[+16]L	LSYIYNM(unimod:35)L	LSYIYNM[Oxi]L	LSYIYNM[Oxidation (M)]L	0.9429	0.988	#N/A	31.53+/-1.02	0	1031.5	2	516.757	#N/A	31.37	739890	301254	438635	2721	2433	288	#N/A	0.000809	VACV			FALSE
20221010_MS_zenoSWATH_DC24_VACV_45C_r2.wiff	45C_r2	LSYIYNML	8	C48H73N9O14S	LSYIYNM[+16]L	LSYIYNM(unimod:35)L	LSYIYNM[Oxi]L	LSYIYNM[Oxidation (M)]L	0.9349	0.9801	#N/A	31.53+/-1.02	0	1031.5	2	516.757	#N/A	31.37	382837	155074	227763	1401	994	407	#N/A	0.000664	VACV			FALSE
20221010_MS_zenoSWATH_DC24_VACV_45C_r3.wiff	45C_r3	LSYIYNML	8	C48H73N9O14S	LSYIYNM[+16]L	LSYIYNM(unimod:35)L	LSYIYNM[Oxi]L	LSYIYNM[Oxidation (M)]L	0.9334	0.9846	#N/A	31.53+/-1.02	0	1031.5	2	516.757	#N/A	31.37	638322	255752	382570	1008	1008	0	#N/A	0.000736	VACV			FALSE
20221010_MS_zenoSWATH_DC24_VACV_49C_r1.wiff	49C_r1	LSYIYNML	8	C48H73N9O14S	LSYIYNM[+16]L	LSYIYNM(unimod:35)L	LSYIYNM[Oxi]L	LSYIYNM[Oxidation (M)]L	0.9373	0.9877	#N/A	31.53+/-1.02	0	1031.5	2	516.757	#N/A	31.37	332340	135249	197091	0	0	0	#N/A	0.000699	VACV			FALSE
20221010_MS_zenoSWATH_DC24_VACV_49C_r2.wiff	49C_r2	LSYIYNML	8	C48H73N9O14S	LSYIYNM[+16]L	LSYIYNM(unimod:35)L	LSYIYNM[Oxi]L	LSYIYNM[Oxidation (M)]L	0.9429	0.9884	#N/A	31.53+/-1.02	0	1031.5	2	516.757	#N/A	31.37	401963	167233	234731	64	64	0	#N/A	0.000648	VACV			FALSE
20221010_MS_zenoSWATH_DC24_VACV_49C_r3.wiff	49C_r3	LSYIYNML	8	C48H73N9O14S	LSYIYNM[+16]L	LSYIYNM(unimod:35)L	LSYIYNM[Oxi]L	LSYIYNM[Oxidation (M)]L	0.9536	0.9833	#N/A	31.53+/-1.02	0	1031.5	2	516.757	#N/A	31.37	271834	116731	155103	0	0	0	#N/A	0.000616	VACV			FALSE
20221010_MS_zenoSWATH_DC24_VACV_53C_r1.wiff	53C_r1	LSYIYNML	8	C48H73N9O14S	LSYIYNM[+16]L	LSYIYNM(unimod:35)L	LSYIYNM[Oxi]L	LSYIYNM[Oxidation (M)]L	0.9319	0.9942	#N/A	31.53+/-1.02	0	1031.5	2	516.757	#N/A	31.37	325809	143754	182056	538	538	0	#N/A	0.000613	VACV			FALSE
20221010_MS_zenoSWATH_DC24_VACV_53C_r2.wiff	53C_r2	LSYIYNML	8	C48H73N9O14S	LSYIYNM[+16]L	LSYIYNM(unimod:35)L	LSYIYNM[Oxi]L	LSYIYNM[Oxidation (M)]L	0.9242	0.992	#N/A	31.53+/-1.02	0	1031.5	2	516.757	#N/A	31.37	284326	113631	170695	379	379	0	#N/A	0.000682	VACV			FALSE
20221010_MS_zenoSWATH_DC24_VACV_53C_r3.wiff	53C_r3	LSYIYNML	8	C48H73N9O14S	LSYIYNM[+16]L	LSYIYNM(unimod:35)L	LSYIYNM[Oxi]L	LSYIYNM[Oxidation (M)]L	0.9234	0.9936	#N/A	31.53+/-1.02	0	1031.5	2	516.757	#N/A	31.37	219947	82408	137538	0	0	0	#N/A	0.000752	VACV			FALSE
20221010_MS_zenoSWATH_DC24_VACV_57C_r1.wiff	57C_r1	LSYIYNML	8	C48H73N9O14S	LSYIYNM[+16]L	LSYIYNM(unimod:35)L	LSYIYNM[Oxi]L	LSYIYNM[Oxidation (M)]L	0.895	0.9298	#N/A	31.53+/-1.02	0	1031.5	2	516.757	#N/A	31.37	19693	9938	9755	0	0	0	#N/A	7.8e-05	VACV			FALSE
20221010_MS_zenoSWATH_DC24_VACV_57C_r2.wiff	57C_r2	LSYIYNML	8	C48H73N9O14S	LSYIYNM[+16]L	LSYIYNM(unimod:35)L	LSYIYNM[Oxi]L	LSYIYNM[Oxidation (M)]L	0.888	0.9477	#N/A	31.53+/-1.02	0	1031.5	2	516.757	#N/A	31.37	15637	8113	7523	73	73	0	#N/A	8.5e-05	VACV			FALSE
20221010_MS_zenoSWATH_DC24_VACV_57C_r3.wiff	57C_r3	LSYIYNML	8	C48H73N9O14S	LSYIYNM[+16]L	LSYIYNM(unimod:35)L	LSYIYNM[Oxi]L	LSYIYNM[Oxidation (M)]L	0.9015	0.907	#N/A	31.53+/-1.02	0	1031.5	2	516.757	#N/A	31.37	16067	8428	7639	0	0	0	#N/A	6.6e-05	VACV			FALSE
20221010_MS_zenoSWATH_DC24_VACV_61C_r1.wiff	61C_r1	LSYIYNML	8	C48H73N9O14S	LSYIYNM[+16]L	LSYIYNM(unimod:35)L	LSYIYNM[Oxi]L	LSYIYNM[Oxidation (M)]L	0.5776	0.7321	#N/A	31.53+/-1.02	0.0882	1031.5	2	516.757	#N/A	31.37	5999	4042	1957	0	0	0	#N/A	1.5e-05	VACV			FALSE
20221010_MS_zenoSWATH_DC24_VACV_61C_r2.wiff	61C_r2	LSYIYNML	8	C48H73N9O14S	LSYIYNM[+16]L	LSYIYNM(unimod:35)L	LSYIYNM[Oxi]L	LSYIYNM[Oxidation (M)]L	0.5737	0.2931	#N/A	31.53+/-1.02	0.1201	1031.5	2	516.757	#N/A	31.37	25929	25459	470	6713	6713	0	#N/A	7.7e-05	VACV			FALSE
20221010_MS_zenoSWATH_DC24_VACV_61C_r3.wiff	61C_r3	LSYIYNML	8	C48H73N9O14S	LSYIYNM[+16]L	LSYIYNM(unimod:35)L	LSYIYNM[Oxi]L	LSYIYNM[Oxidation (M)]L	0.5342	0.2364	#N/A	31.53+/-1.02	0.0496	1031.5	2	516.757	#N/A	31.37	2221	116	2104	0	0	0	#N/A	7e-06	VACV			FALSE
20221010_MS_zenoSWATH_DC24_VACV_65C_r1.wiff	65C_r1	LSYIYNML	8	C48H73N9O14S	LSYIYNM[+16]L	LSYIYNM(unimod:35)L	LSYIYNM[Oxi]L	LSYIYNM[Oxidation (M)]L	0.552	0.6439	#N/A	31.53+/-1.02	0.2243	1031.5	2	516.757	#N/A	31.37	1327	482	845	0	0	0	#N/A	4e-06	VACV			FALSE
20221010_MS_zenoSWATH_DC24_VACV_65C_r2.wiff	65C_r2	LSYIYNML	8	C48H73N9O14S	LSYIYNM[+16]L	LSYIYNM(unimod:35)L	LSYIYNM[Oxi]L	LSYIYNM[Oxidation (M)]L	0.2834	0.6407	#N/A	31.53+/-1.02	0.2861	1031.5	2	516.757	#N/A	31.37	3240	823	2418	0	0	0	#N/A	2.2e-05	VACV			FALSE
20221010_MS_zenoSWATH_DC24_VACV_65C_r3.wiff	65C_r3	LSYIYNML	8	C48H73N9O14S	LSYIYNM[+16]L	LSYIYNM(unimod:35)L	LSYIYNM[Oxi]L	LSYIYNM[Oxidation (M)]L	0.3587	0.5154	#N/A	31.53+/-1.02	0.3198	1031.5	2	516.757	#N/A	31.37	960	596	364	201	201	0	#N/A	3e-06	VACV			FALSE
20221010_MS_zenoSWATH_DC24_VACV_69C_r1.wiff	69C_r1	LSYIYNML	8	C48H73N9O14S	LSYIYNM[+16]L	LSYIYNM(unimod:35)L	LSYIYNM[Oxi]L	LSYIYNM[Oxidation (M)]L	0.3088	0.7688	#N/A	31.53+/-1.02	0.3507	1031.5	2	516.757	#N/A	31.37	6071	1441	4629	0	0	0	#N/A	2.4e-05	VACV			FALSE
20221010_MS_zenoSWATH_DC24_VACV_69C_r2.wiff	69C_r2	LSYIYNML	8	C48H73N9O14S	LSYIYNM[+16]L	LSYIYNM(unimod:35)L	LSYIYNM[Oxi]L	LSYIYNM[Oxidation (M)]L	0.3411	0.7622	#N/A	31.53+/-1.02	0.2969	1031.5	2	516.757	#N/A	31.37	554	128	426	0	0	0	#N/A	2e-06	VACV			FALSE
20221010_MS_zenoSWATH_DC24_VACV_69C_r3.wiff	69C_r3	LSYIYNML	8	C48H73N9O14S	LSYIYNM[+16]L	LSYIYNM(unimod:35)L	LSYIYNM[Oxi]L	LSYIYNM[Oxidation (M)]L	0.2761	0.6171	#N/A	31.53+/-1.02	0.3995	1031.5	2	516.757	#N/A	31.37	319	97	222	0	0	0	#N/A	3e-06	VACV			FALSE
20221010_MS_zenoSWATH_DC24_VACV_73C_r1.wiff	73C_r1	LSYIYNML	8	C48H73N9O14S	LSYIYNM[+16]L	LSYIYNM(unimod:35)L	LSYIYNM[Oxi]L	LSYIYNM[Oxidation (M)]L	0.413	0.8001	#N/A	31.53+/-1.02	0.2973	1031.5	2	516.757	#N/A	31.37	445	298	147	0	0	0	#N/A	3e-06	VACV			FALSE
20221010_MS_zenoSWATH_DC24_VACV_73C_r2.wiff	73C_r2	LSYIYNML	8	C48H73N9O14S	LSYIYNM[+16]L	LSYIYNM(unimod:35)L	LSYIYNM[Oxi]L	LSYIYNM[Oxidation (M)]L	0.3432	0.7833	#N/A	31.53+/-1.02	0.28	1031.5	2	516.757	#N/A	31.37	358	265	93	16	16	0	#N/A	3e-06	VACV			FALSE
20221010_MS_zenoSWATH_DC24_VACV_73C_r3.wiff	73C_r3	LSYIYNML	8	C48H73N9O14S	LSYIYNM[+16]L	LSYIYNM(unimod:35)L	LSYIYNM[Oxi]L	LSYIYNM[Oxidation (M)]L	0.5407	0.6513	#N/A	31.53+/-1.02	0.0352	1031.5	2	516.757	#N/A	31.37	784	186	598	68	68	0	#N/A	3e-06	VACV			FALSE
20221010_MS_zenoSWATH_DC24_VACV_37C_r1.wiff	37C_r1	SAPMNVDNLIMIV	13	C61H105N15O19S2	SAPMNVDNLIMIV	SAPMNVDNLIMIV	SAPMNVDNLIMIV	SAPMNVDNLIMIV	0.8632	0.9804	#N/A	45.03+/-1.46	0.0396	1415.72	2	708.865	#N/A	45.76	20104	10929	9175	0	0	0	#N/A	2.1e-05	VACV			FALSE
20221010_MS_zenoSWATH_DC24_VACV_37C_r2.wiff	37C_r2	SAPMNVDNLIMIV	13	C61H105N15O19S2	SAPMNVDNLIMIV	SAPMNVDNLIMIV	SAPMNVDNLIMIV	SAPMNVDNLIMIV	0.9487	0.9961	#N/A	45.03+/-1.46	0	1415.72	2	708.865	#N/A	45.76	201875	116097	85777	0	0	0	#N/A	0.000317	VACV			FALSE
20221010_MS_zenoSWATH_DC24_VACV_37C_r3.wiff	37C_r3	SAPMNVDNLIMIV	13	C61H105N15O19S2	SAPMNVDNLIMIV	SAPMNVDNLIMIV	SAPMNVDNLIMIV	SAPMNVDNLIMIV	0.9157	0.9636	#N/A	45.03+/-1.46	0	1415.72	2	708.865	#N/A	45.76	17720	11804	5915	0	0	0	#N/A	2.3e-05	VACV			FALSE
20221010_MS_zenoSWATH_DC24_VACV_41C_r1.wiff	41C_r1	SAPMNVDNLIMIV	13	C61H105N15O19S2	SAPMNVDNLIMIV	SAPMNVDNLIMIV	SAPMNVDNLIMIV	SAPMNVDNLIMIV	0.9577	0.9901	#N/A	45.03+/-1.46	0	1415.72	2	708.865	#N/A	45.76	195196	104042	91154	253	253	0	#N/A	0.000238	VACV			FALSE
20221010_MS_zenoSWATH_DC24_VACV_41C_r2.wiff	41C_r2	SAPMNVDNLIMIV	13	C61H105N15O19S2	SAPMNVDNLIMIV	SAPMNVDNLIMIV	SAPMNVDNLIMIV	SAPMNVDNLIMIV	0.973	0.9984	#N/A	45.03+/-1.46	0	1415.72	2	708.865	#N/A	45.76	143039	80553	62486	0	0	0	#N/A	0.000205	VACV			FALSE
20221010_MS_zenoSWATH_DC24_VACV_41C_r3.wiff	41C_r3	SAPMNVDNLIMIV	13	C61H105N15O19S2	SAPMNVDNLIMIV	SAPMNVDNLIMIV	SAPMNVDNLIMIV	SAPMNVDNLIMIV	0.9313	0.9894	#N/A	45.03+/-1.46	0.0002	1415.72	2	708.865	#N/A	45.76	80035	47718	32317	347	347	0	#N/A	0.000113	VACV			FALSE
20221010_MS_zenoSWATH_DC24_VACV_45C_r1.wiff	45C_r1	SAPMNVDNLIMIV	13	C61H105N15O19S2	SAPMNVDNLIMIV	SAPMNVDNLIMIV	SAPMNVDNLIMIV	SAPMNVDNLIMIV	0.9298	0.9908	#N/A	45.03+/-1.46	0	1415.72	2	708.865	#N/A	45.76	62192	39792	22400	0	0	0	#N/A	6.8e-05	VACV			FALSE
20221010_MS_zenoSWATH_DC24_VACV_45C_r2.wiff	45C_r2	SAPMNVDNLIMIV	13	C61H105N15O19S2	SAPMNVDNLIMIV	SAPMNVDNLIMIV	SAPMNVDNLIMIV	SAPMNVDNLIMIV	0.9681	0.9965	#N/A	45.03+/-1.46	0	1415.72	2	708.865	#N/A	45.76	97954	52064	45890	0	0	0	#N/A	0.00017	VACV			FALSE
20221010_MS_zenoSWATH_DC24_VACV_45C_r3.wiff	45C_r3	SAPMNVDNLIMIV	13	C61H105N15O19S2	SAPMNVDNLIMIV	SAPMNVDNLIMIV	SAPMNVDNLIMIV	SAPMNVDNLIMIV	0.9196	0.9867	#N/A	45.03+/-1.46	0	1415.72	2	708.865	#N/A	45.76	64100	35538	28562	0	0	0	#N/A	7.4e-05	VACV			FALSE
20221010_MS_zenoSWATH_DC24_VACV_49C_r1.wiff	49C_r1	SAPMNVDNLIMIV	13	C61H105N15O19S2	SAPMNVDNLIMIV	SAPMNVDNLIMIV	SAPMNVDNLIMIV	SAPMNVDNLIMIV	0.9606	0.9832	#N/A	45.03+/-1.46	0	1415.72	2	708.865	#N/A	45.76	95643	52516	43126	159	159	0	#N/A	0.000201	VACV			FALSE
20221010_MS_zenoSWATH_DC24_VACV_49C_r2.wiff	49C_r2	SAPMNVDNLIMIV	13	C61H105N15O19S2	SAPMNVDNLIMIV	SAPMNVDNLIMIV	SAPMNVDNLIMIV	SAPMNVDNLIMIV	0.9654	0.9959	#N/A	45.03+/-1.46	0	1415.72	2	708.865	#N/A	45.76	38646	22377	16269	0	0	0	#N/A	6.2e-05	VACV			FALSE
20221010_MS_zenoSWATH_DC24_VACV_49C_r3.wiff	49C_r3	SAPMNVDNLIMIV	13	C61H105N15O19S2	SAPMNVDNLIMIV	SAPMNVDNLIMIV	SAPMNVDNLIMIV	SAPMNVDNLIMIV	0.9296	0.9851	#N/A	45.03+/-1.46	0	1415.72	2	708.865	#N/A	45.76	45530	25053	20477	0	0	0	#N/A	0.000103	VACV			FALSE
20221010_MS_zenoSWATH_DC24_VACV_53C_r1.wiff	53C_r1	SAPMNVDNLIMIV	13	C61H105N15O19S2	SAPMNVDNLIMIV	SAPMNVDNLIMIV	SAPMNVDNLIMIV	SAPMNVDNLIMIV	0.7392	0.9683	#N/A	45.03+/-1.46	0.0942	1415.72	2	708.865	#N/A	45.76	10587	5813	4774	0	0	0	#N/A	2e-05	VACV			FALSE
20221010_MS_zenoSWATH_DC24_VACV_53C_r2.wiff	53C_r2	SAPMNVDNLIMIV	13	C61H105N15O19S2	SAPMNVDNLIMIV	SAPMNVDNLIMIV	SAPMNVDNLIMIV	SAPMNVDNLIMIV	0.8187	0.9743	#N/A	45.03+/-1.46	0.0011	1415.72	2	708.865	#N/A	45.76	12075	7166	4908	0	0	0	#N/A	2.9e-05	VACV			FALSE
20221010_MS_zenoSWATH_DC24_VACV_53C_r3.wiff	53C_r3	SAPMNVDNLIMIV	13	C61H105N15O19S2	SAPMNVDNLIMIV	SAPMNVDNLIMIV	SAPMNVDNLIMIV	SAPMNVDNLIMIV	0.7137	0.983	#N/A	45.03+/-1.46	0.2651	1415.72	2	708.865	#N/A	45.76	4208	2376	1832	0	0	0	#N/A	1.4e-05	VACV			FALSE
20221010_MS_zenoSWATH_DC24_VACV_57C_r1.wiff	57C_r1	SAPMNVDNLIMIV	13	C61H105N15O19S2	SAPMNVDNLIMIV	SAPMNVDNLIMIV	SAPMNVDNLIMIV	SAPMNVDNLIMIV	0.8616	0.9764	#N/A	45.03+/-1.46	0	1415.72	2	708.865	#N/A	45.76	17916	10693	7222	131	131	0	#N/A	7.1e-05	VACV			FALSE
20221010_MS_zenoSWATH_DC24_VACV_57C_r2.wiff	57C_r2	SAPMNVDNLIMIV	13	C61H105N15O19S2	SAPMNVDNLIMIV	SAPMNVDNLIMIV	SAPMNVDNLIMIV	SAPMNVDNLIMIV	0.366	0.914	#N/A	45.03+/-1.46	0.3995	1415.72	2	708.865	#N/A	45.76	567	524	43	191	191	0	#N/A	3e-06	VACV			FALSE
20221010_MS_zenoSWATH_DC24_VACV_57C_r3.wiff	57C_r3	SAPMNVDNLIMIV	13	C61H105N15O19S2	SAPMNVDNLIMIV	SAPMNVDNLIMIV	SAPMNVDNLIMIV	SAPMNVDNLIMIV	0.8174	0.8639	#N/A	45.03+/-1.46	0.0068	1415.72	2	708.865	#N/A	45.76	8108	4254	3854	1595	1595	0	#N/A	3.3e-05	VACV			FALSE
20221010_MS_zenoSWATH_DC24_VACV_61C_r1.wiff	61C_r1	SAPMNVDNLIMIV	13	C61H105N15O19S2	SAPMNVDNLIMIV	SAPMNVDNLIMIV	SAPMNVDNLIMIV	SAPMNVDNLIMIV	0.5358	0.9379	#N/A	45.03+/-1.46	0.1075	1415.72	2	708.865	#N/A	45.76	6021	2744	3277	522	522	0	#N/A	1.5e-05	VACV			FALSE
20221010_MS_zenoSWATH_DC24_VACV_61C_r2.wiff	61C_r2	SAPMNVDNLIMIV	13	C61H105N15O19S2	SAPMNVDNLIMIV	SAPMNVDNLIMIV	SAPMNVDNLIMIV	SAPMNVDNLIMIV	0.4085	0.5877	#N/A	45.03+/-1.46	0.1247	1415.72	2	708.865	#N/A	45.76	3038	2436	602	1710	1710	0	#N/A	9e-06	VACV			FALSE
20221010_MS_zenoSWATH_DC24_VACV_61C_r3.wiff	61C_r3	SAPMNVDNLIMIV	13	C61H105N15O19S2	SAPMNVDNLIMIV	SAPMNVDNLIMIV	SAPMNVDNLIMIV	SAPMNVDNLIMIV	0.5064	0.7969	#N/A	45.03+/-1.46	0.1874	1415.72	2	708.865	#N/A	45.76	33415	30356	3059	747	747	0	#N/A	0.000113	VACV			FALSE
20221010_MS_zenoSWATH_DC24_VACV_65C_r1.wiff	65C_r1	SAPMNVDNLIMIV	13	C61H105N15O19S2	SAPMNVDNLIMIV	SAPMNVDNLIMIV	SAPMNVDNLIMIV	SAPMNVDNLIMIV	0.6686	0.8754	#N/A	45.03+/-1.46	0.0016	1415.72	2	708.865	#N/A	45.76	6849	3015	3834	0	0	0	#N/A	2.2e-05	VACV			FALSE
20221010_MS_zenoSWATH_DC24_VACV_65C_r2.wiff	65C_r2	SAPMNVDNLIMIV	13	C61H105N15O19S2	SAPMNVDNLIMIV	SAPMNVDNLIMIV	SAPMNVDNLIMIV	SAPMNVDNLIMIV	0.2038	0.7086	#N/A	45.03+/-1.46	0.3995	1415.72	2	708.865	#N/A	45.76	347	159	189	142	142	0	#N/A	2e-06	VACV			FALSE
20221010_MS_zenoSWATH_DC24_VACV_65C_r3.wiff	65C_r3	SAPMNVDNLIMIV	13	C61H105N15O19S2	SAPMNVDNLIMIV	SAPMNVDNLIMIV	SAPMNVDNLIMIV	SAPMNVDNLIMIV	0.3519	0.6052	#N/A	45.03+/-1.46	0.2634	1415.72	2	708.865	#N/A	45.76	960	99	862	0	0	0	#N/A	3e-06	VACV			FALSE
20221010_MS_zenoSWATH_DC24_VACV_69C_r1.wiff	69C_r1	SAPMNVDNLIMIV	13	C61H105N15O19S2	SAPMNVDNLIMIV	SAPMNVDNLIMIV	SAPMNVDNLIMIV	SAPMNVDNLIMIV	0.2215	0.681	#N/A	45.03+/-1.46	0.3006	1415.72	2	708.865	#N/A	45.76	529	218	311	0	0	0	#N/A	2e-06	VACV			FALSE
20221010_MS_zenoSWATH_DC24_VACV_69C_r2.wiff	69C_r2	SAPMNVDNLIMIV	13	C61H105N15O19S2	SAPMNVDNLIMIV	SAPMNVDNLIMIV	SAPMNVDNLIMIV	SAPMNVDNLIMIV	0.3281	0.5186	#N/A	45.03+/-1.46	0.2005	1415.72	2	708.865	#N/A	45.76	1595	378	1217	43	43	0	#N/A	6e-06	VACV			FALSE
20221010_MS_zenoSWATH_DC24_VACV_69C_r3.wiff	69C_r3	SAPMNVDNLIMIV	13	C61H105N15O19S2	SAPMNVDNLIMIV	SAPMNVDNLIMIV	SAPMNVDNLIMIV	SAPMNVDNLIMIV	0.2167	0.4031	#N/A	45.03+/-1.46	0.3037	1415.72	2	708.865	#N/A	45.76	602	13	589	40	40	0	#N/A	5e-06	VACV			FALSE
20221010_MS_zenoSWATH_DC24_VACV_73C_r1.wiff	73C_r1	SAPMNVDNLIMIV	13	C61H105N15O19S2	SAPMNVDNLIMIV	SAPMNVDNLIMIV	SAPMNVDNLIMIV	SAPMNVDNLIMIV	0.3458	0.5935	#N/A	45.03+/-1.46	0.2871	1415.72	2	708.865	#N/A	45.76	426	57	369	9	9	0	#N/A	3e-06	VACV			FALSE
20221010_MS_zenoSWATH_DC24_VACV_73C_r2.wiff	73C_r2	SAPMNVDNLIMIV	13	C61H105N15O19S2	SAPMNVDNLIMIV	SAPMNVDNLIMIV	SAPMNVDNLIMIV	SAPMNVDNLIMIV	0.5125	0.9307	#N/A	45.03+/-1.46	0.0778	1415.72	2	708.865	#N/A	45.76	4413	2731	1682	37	37	0	#N/A	3.6e-05	VACV			FALSE
20221010_MS_zenoSWATH_DC24_VACV_73C_r3.wiff	73C_r3	SAPMNVDNLIMIV	13	C61H105N15O19S2	SAPMNVDNLIMIV	SAPMNVDNLIMIV	SAPMNVDNLIMIV	SAPMNVDNLIMIV	0.8648	0.9442	#N/A	45.03+/-1.46	0.1427	1415.72	2	708.865	#N/A	45.76	13083	7825	5258	1694	1600	94	#N/A	4.8e-05	VACV			FALSE
20221010_MS_zenoSWATH_DC24_VACV_37C_r1.wiff	37C_r1	SAPMNVDNLIMIV	13	C61H105N15O20S2	SAPM[+16]NVDNLIMIV	SAPM(unimod:35)NVDNLIMIV	SAPM[Oxi]NVDNLIMIV	SAPM[Oxidation (M)]NVDNLIMIV	0.9408	0.9834	#N/A	40.82+/-1.1	0.0003	1431.71	2	716.862	#N/A	41.09	79389	39673	39716	0	0	0	#N/A	8.4e-05	VACV			FALSE
20221010_MS_zenoSWATH_DC24_VACV_37C_r2.wiff	37C_r2	SAPMNVDNLIMIV	13	C61H105N15O20S2	SAPM[+16]NVDNLIMIV	SAPM(unimod:35)NVDNLIMIV	SAPM[Oxi]NVDNLIMIV	SAPM[Oxidation (M)]NVDNLIMIV	0.9716	0.9878	#N/A	40.82+/-1.1	0	1431.71	2	716.862	#N/A	41.09	241764	123835	117929	563	563	0	#N/A	0.00038	VACV			FALSE
20221010_MS_zenoSWATH_DC24_VACV_37C_r3.wiff	37C_r3	SAPMNVDNLIMIV	13	C61H105N15O20S2	SAPM[+16]NVDNLIMIV	SAPM(unimod:35)NVDNLIMIV	SAPM[Oxi]NVDNLIMIV	SAPM[Oxidation (M)]NVDNLIMIV	0.9326	0.9875	#N/A	40.82+/-1.1	0	1431.71	2	716.862	#N/A	41.09	84785	47445	37339	0	0	0	#N/A	0.000111	VACV			FALSE
20221010_MS_zenoSWATH_DC24_VACV_41C_r1.wiff	41C_r1	SAPMNVDNLIMIV	13	C61H105N15O20S2	SAPM[+16]NVDNLIMIV	SAPM(unimod:35)NVDNLIMIV	SAPM[Oxi]NVDNLIMIV	SAPM[Oxidation (M)]NVDNLIMIV	0.9697	0.9884	#N/A	40.82+/-1.1	0	1431.71	2	716.862	#N/A	41.09	336638	167293	169344	636	636	0	#N/A	0.00041	VACV			FALSE
20221010_MS_zenoSWATH_DC24_VACV_41C_r2.wiff	41C_r2	SAPMNVDNLIMIV	13	C61H105N15O20S2	SAPM[+16]NVDNLIMIV	SAPM(unimod:35)NVDNLIMIV	SAPM[Oxi]NVDNLIMIV	SAPM[Oxidation (M)]NVDNLIMIV	0.9574	0.994	#N/A	40.82+/-1.1	0	1431.71	2	716.862	#N/A	41.09	340333	179813	160520	74	74	0	#N/A	0.000488	VACV			FALSE
20221010_MS_zenoSWATH_DC24_VACV_41C_r3.wiff	41C_r3	SAPMNVDNLIMIV	13	C61H105N15O20S2	SAPM[+16]NVDNLIMIV	SAPM(unimod:35)NVDNLIMIV	SAPM[Oxi]NVDNLIMIV	SAPM[Oxidation (M)]NVDNLIMIV	0.9769	0.9927	#N/A	40.82+/-1.1	0	1431.71	2	716.862	#N/A	41.09	309567	164692	144875	651	651	0	#N/A	0.000437	VACV			FALSE
20221010_MS_zenoSWATH_DC24_VACV_45C_r1.wiff	45C_r1	SAPMNVDNLIMIV	13	C61H105N15O20S2	SAPM[+16]NVDNLIMIV	SAPM(unimod:35)NVDNLIMIV	SAPM[Oxi]NVDNLIMIV	SAPM[Oxidation (M)]NVDNLIMIV	0.956	0.9934	#N/A	40.82+/-1.1	0	1431.71	2	716.862	#N/A	41.09	216041	109649	106392	385	385	0	#N/A	0.000236	VACV			FALSE
20221010_MS_zenoSWATH_DC24_VACV_45C_r2.wiff	45C_r2	SAPMNVDNLIMIV	13	C61H105N15O20S2	SAPM[+16]NVDNLIMIV	SAPM(unimod:35)NVDNLIMIV	SAPM[Oxi]NVDNLIMIV	SAPM[Oxidation (M)]NVDNLIMIV	0.9451	0.9955	#N/A	40.82+/-1.1	0	1431.71	2	716.862	#N/A	41.09	210883	106936	103947	0	0	0	#N/A	0.000366	VACV			FALSE
20221010_MS_zenoSWATH_DC24_VACV_45C_r3.wiff	45C_r3	SAPMNVDNLIMIV	13	C61H105N15O20S2	SAPM[+16]NVDNLIMIV	SAPM(unimod:35)NVDNLIMIV	SAPM[Oxi]NVDNLIMIV	SAPM[Oxidation (M)]NVDNLIMIV	0.9495	0.9879	#N/A	40.82+/-1.1	0	1431.71	2	716.862	#N/A	41.09	204797	110909	93888	328	328	0	#N/A	0.000236	VACV			FALSE
20221010_MS_zenoSWATH_DC24_VACV_49C_r1.wiff	49C_r1	SAPMNVDNLIMIV	13	C61H105N15O20S2	SAPM[+16]NVDNLIMIV	SAPM(unimod:35)NVDNLIMIV	SAPM[Oxi]NVDNLIMIV	SAPM[Oxidation (M)]NVDNLIMIV	0.9312	0.984	#N/A	40.82+/-1.1	0	1431.71	2	716.862	#N/A	41.09	129135	69395	59740	19	19	0	#N/A	0.000272	VACV			FALSE
20221010_MS_zenoSWATH_DC24_VACV_49C_r2.wiff	49C_r2	SAPMNVDNLIMIV	13	C61H105N15O20S2	SAPM[+16]NVDNLIMIV	SAPM(unimod:35)NVDNLIMIV	SAPM[Oxi]NVDNLIMIV	SAPM[Oxidation (M)]NVDNLIMIV	0.9441	0.9913	#N/A	40.82+/-1.1	0.0003	1431.71	2	716.862	#N/A	41.09	81280	45085	36195	0	0	0	#N/A	0.000131	VACV			FALSE
20221010_MS_zenoSWATH_DC24_VACV_49C_r3.wiff	49C_r3	SAPMNVDNLIMIV	13	C61H105N15O20S2	SAPM[+16]NVDNLIMIV	SAPM(unimod:35)NVDNLIMIV	SAPM[Oxi]NVDNLIMIV	SAPM[Oxidation (M)]NVDNLIMIV	0.9551	0.9847	#N/A	40.82+/-1.1	0	1431.71	2	716.862	#N/A	41.09	83486	41987	41498	0	0	0	#N/A	0.000189	VACV			FALSE
20221010_MS_zenoSWATH_DC24_VACV_53C_r1.wiff	53C_r1	SAPMNVDNLIMIV	13	C61H105N15O20S2	SAPM[+16]NVDNLIMIV	SAPM(unimod:35)NVDNLIMIV	SAPM[Oxi]NVDNLIMIV	SAPM[Oxidation (M)]NVDNLIMIV	0.8706	0.9919	#N/A	40.82+/-1.1	0	1431.71	2	716.862	#N/A	41.09	25696	13004	12692	0	0	0	#N/A	4.8e-05	VACV			FALSE
20221010_MS_zenoSWATH_DC24_VACV_53C_r2.wiff	53C_r2	SAPMNVDNLIMIV	13	C61H105N15O20S2	SAPM[+16]NVDNLIMIV	SAPM(unimod:35)NVDNLIMIV	SAPM[Oxi]NVDNLIMIV	SAPM[Oxidation (M)]NVDNLIMIV	0.9321	0.9889	#N/A	40.82+/-1.1	0.0002	1431.71	2	716.862	#N/A	41.09	30424	14798	15626	0	0	0	#N/A	7.3e-05	VACV			FALSE
20221010_MS_zenoSWATH_DC24_VACV_53C_r3.wiff	53C_r3	SAPMNVDNLIMIV	13	C61H105N15O20S2	SAPM[+16]NVDNLIMIV	SAPM(unimod:35)NVDNLIMIV	SAPM[Oxi]NVDNLIMIV	SAPM[Oxidation (M)]NVDNLIMIV	0.883	0.9951	#N/A	40.82+/-1.1	0	1431.71	2	716.862	#N/A	41.09	16798	7596	9202	0	0	0	#N/A	5.7e-05	VACV			FALSE
20221010_MS_zenoSWATH_DC24_VACV_57C_r1.wiff	57C_r1	SAPMNVDNLIMIV	13	C61H105N15O20S2	SAPM[+16]NVDNLIMIV	SAPM(unimod:35)NVDNLIMIV	SAPM[Oxi]NVDNLIMIV	SAPM[Oxidation (M)]NVDNLIMIV	0.6946	0.8602	#N/A	40.82+/-1.1	0.0304	1431.71	2	716.862	#N/A	41.09	17006	11271	5734	172	172	0	#N/A	6.7e-05	VACV			FALSE
20221010_MS_zenoSWATH_DC24_VACV_57C_r2.wiff	57C_r2	SAPMNVDNLIMIV	13	C61H105N15O20S2	SAPM[+16]NVDNLIMIV	SAPM(unimod:35)NVDNLIMIV	SAPM[Oxi]NVDNLIMIV	SAPM[Oxidation (M)]NVDNLIMIV	0.7135	0.8682	#N/A	40.82+/-1.1	0.0979	1431.71	2	716.862	#N/A	41.09	3954	2458	1496	174	174	0	#N/A	2.1e-05	VACV			FALSE
20221010_MS_zenoSWATH_DC24_VACV_57C_r3.wiff	57C_r3	SAPMNVDNLIMIV	13	C61H105N15O20S2	SAPM[+16]NVDNLIMIV	SAPM(unimod:35)NVDNLIMIV	SAPM[Oxi]NVDNLIMIV	SAPM[Oxidation (M)]NVDNLIMIV	0.8857	0.8215	#N/A	40.82+/-1.1	0.0148	1431.71	2	716.862	#N/A	41.09	19216	12308	6908	761	761	0	#N/A	7.9e-05	VACV			FALSE
20221010_MS_zenoSWATH_DC24_VACV_61C_r1.wiff	61C_r1	SAPMNVDNLIMIV	13	C61H105N15O20S2	SAPM[+16]NVDNLIMIV	SAPM(unimod:35)NVDNLIMIV	SAPM[Oxi]NVDNLIMIV	SAPM[Oxidation (M)]NVDNLIMIV	0.4169	0.8643	#N/A	40.82+/-1.1	0.0765	1431.71	2	716.862	#N/A	41.09	1542	564	978	318	318	0	#N/A	4e-06	VACV			FALSE
20221010_MS_zenoSWATH_DC24_VACV_61C_r2.wiff	61C_r2	SAPMNVDNLIMIV	13	C61H105N15O20S2	SAPM[+16]NVDNLIMIV	SAPM(unimod:35)NVDNLIMIV	SAPM[Oxi]NVDNLIMIV	SAPM[Oxidation (M)]NVDNLIMIV	0.7418	0.5757	#N/A	40.82+/-1.1	0.2647	1431.71	2	716.862	#N/A	41.09	81982	80588	1394	18881	18881	0	#N/A	0.000245	VACV			FALSE
20221010_MS_zenoSWATH_DC24_VACV_61C_r3.wiff	61C_r3	SAPMNVDNLIMIV	13	C61H105N15O20S2	SAPM[+16]NVDNLIMIV	SAPM(unimod:35)NVDNLIMIV	SAPM[Oxi]NVDNLIMIV	SAPM[Oxidation (M)]NVDNLIMIV	0.772	0.6162	#N/A	40.82+/-1.1	0.043	1431.71	2	716.862	#N/A	41.09	5525	3816	1709	1608	1608	0	#N/A	1.9e-05	VACV			FALSE
20221010_MS_zenoSWATH_DC24_VACV_65C_r1.wiff	65C_r1	SAPMNVDNLIMIV	13	C61H105N15O20S2	SAPM[+16]NVDNLIMIV	SAPM(unimod:35)NVDNLIMIV	SAPM[Oxi]NVDNLIMIV	SAPM[Oxidation (M)]NVDNLIMIV	0.717	0.8238	#N/A	40.82+/-1.1	0.1829	1431.71	2	716.862	#N/A	41.09	13016	9183	3833	1120	0	1120	#N/A	4.2e-05	VACV			FALSE
20221010_MS_zenoSWATH_DC24_VACV_65C_r2.wiff	65C_r2	SAPMNVDNLIMIV	13	C61H105N15O20S2	SAPM[+16]NVDNLIMIV	SAPM(unimod:35)NVDNLIMIV	SAPM[Oxi]NVDNLIMIV	SAPM[Oxidation (M)]NVDNLIMIV	0.4016	0.6808	#N/A	40.82+/-1.1	0.3503	1431.71	2	716.862	#N/A	41.09	803	272	531	20	20	0	#N/A	5e-06	VACV			FALSE
20221010_MS_zenoSWATH_DC24_VACV_65C_r3.wiff	65C_r3	SAPMNVDNLIMIV	13	C61H105N15O20S2	SAPM[+16]NVDNLIMIV	SAPM(unimod:35)NVDNLIMIV	SAPM[Oxi]NVDNLIMIV	SAPM[Oxidation (M)]NVDNLIMIV	0.7622	0.8623	#N/A	40.82+/-1.1	0.1798	1431.71	2	716.862	#N/A	41.09	12598	8365	4232	563	563	0	#N/A	3.9e-05	VACV			FALSE
20221010_MS_zenoSWATH_DC24_VACV_69C_r1.wiff	69C_r1	SAPMNVDNLIMIV	13	C61H105N15O20S2	SAPM[+16]NVDNLIMIV	SAPM(unimod:35)NVDNLIMIV	SAPM[Oxi]NVDNLIMIV	SAPM[Oxidation (M)]NVDNLIMIV	0.6524	0.8981	#N/A	40.82+/-1.1	0.1669	1431.71	2	716.862	#N/A	41.09	5355	2022	3333	1358	1358	0	#N/A	2.1e-05	VACV			FALSE
20221010_MS_zenoSWATH_DC24_VACV_69C_r2.wiff	69C_r2	SAPMNVDNLIMIV	13	C61H105N15O20S2	SAPM[+16]NVDNLIMIV	SAPM(unimod:35)NVDNLIMIV	SAPM[Oxi]NVDNLIMIV	SAPM[Oxidation (M)]NVDNLIMIV	0.7756	0.8784	#N/A	40.82+/-1.1	0.004	1431.71	2	716.862	#N/A	41.09	5778	2987	2791	431	260	170	#N/A	2.2e-05	VACV			FALSE
20221010_MS_zenoSWATH_DC24_VACV_69C_r3.wiff	69C_r3	SAPMNVDNLIMIV	13	C61H105N15O20S2	SAPM[+16]NVDNLIMIV	SAPM(unimod:35)NVDNLIMIV	SAPM[Oxi]NVDNLIMIV	SAPM[Oxidation (M)]NVDNLIMIV	0.3439	0.6532	#N/A	40.82+/-1.1	0.3995	1431.71	2	716.862	#N/A	41.09	464	163	301	41	41	0	#N/A	4e-06	VACV			FALSE
20221010_MS_zenoSWATH_DC24_VACV_73C_r1.wiff	73C_r1	SAPMNVDNLIMIV	13	C61H105N15O20S2	SAPM[+16]NVDNLIMIV	SAPM(unimod:35)NVDNLIMIV	SAPM[Oxi]NVDNLIMIV	SAPM[Oxidation (M)]NVDNLIMIV	0.7087	0.9078	#N/A	40.82+/-1.1	0.1653	1431.71	2	716.862	#N/A	41.09	695	242	453	96	96	0	#N/A	4e-06	VACV			FALSE
20221010_MS_zenoSWATH_DC24_VACV_73C_r2.wiff	73C_r2	SAPMNVDNLIMIV	13	C61H105N15O20S2	SAPM[+16]NVDNLIMIV	SAPM(unimod:35)NVDNLIMIV	SAPM[Oxi]NVDNLIMIV	SAPM[Oxidation (M)]NVDNLIMIV	0.4136	0.6888	#N/A	40.82+/-1.1	0.2668	1431.71	2	716.862	#N/A	41.09	1227	475	752	1277	1277	0	#N/A	1e-05	VACV			FALSE
20221010_MS_zenoSWATH_DC24_VACV_73C_r3.wiff	73C_r3	SAPMNVDNLIMIV	13	C61H105N15O20S2	SAPM[+16]NVDNLIMIV	SAPM(unimod:35)NVDNLIMIV	SAPM[Oxi]NVDNLIMIV	SAPM[Oxidation (M)]NVDNLIMIV	0.5793	0.6332	#N/A	40.82+/-1.1	0.0906	1431.71	2	716.862	#N/A	41.09	2334	764	1570	41	41	0	#N/A	9e-06	VACV			FALSE
20221010_MS_zenoSWATH_DC24_VACV_37C_r1.wiff	37C_r1	SAPMNVDNLIMIV	13	C61H105N15O20S2	SAPM[+16]NVDNLIMIV	SAPM(unimod:35)NVDNLIMIV	SAPM[Oxi]NVDNLIMIV	SAPM[Oxidation (M)]NVDNLIMIV	0.4093	0.6192	#N/A	40.81+/-1.09	0.0003	1431.71	3	478.244	#N/A	41.09	2051	1756	295	0	0	0	#N/A	2e-06	VACV			FALSE
20221010_MS_zenoSWATH_DC24_VACV_37C_r2.wiff	37C_r2	SAPMNVDNLIMIV	13	C61H105N15O20S2	SAPM[+16]NVDNLIMIV	SAPM(unimod:35)NVDNLIMIV	SAPM[Oxi]NVDNLIMIV	SAPM[Oxidation (M)]NVDNLIMIV	0.6921	0.9081	#N/A	40.81+/-1.09	0	1431.71	3	478.244	#N/A	41.09	3766	1244	2522	306	306	0	#N/A	6e-06	VACV			FALSE
20221010_MS_zenoSWATH_DC24_VACV_37C_r3.wiff	37C_r3	SAPMNVDNLIMIV	13	C61H105N15O20S2	SAPM[+16]NVDNLIMIV	SAPM(unimod:35)NVDNLIMIV	SAPM[Oxi]NVDNLIMIV	SAPM[Oxidation (M)]NVDNLIMIV	0.3582	0.5893	#N/A	40.81+/-1.09	0	1431.71	3	478.244	#N/A	41.09	2024	1648	376	0	0	0	#N/A	3e-06	VACV			FALSE
20221010_MS_zenoSWATH_DC24_VACV_41C_r1.wiff	41C_r1	SAPMNVDNLIMIV	13	C61H105N15O20S2	SAPM[+16]NVDNLIMIV	SAPM(unimod:35)NVDNLIMIV	SAPM[Oxi]NVDNLIMIV	SAPM[Oxidation (M)]NVDNLIMIV	0.7861	0.7854	#N/A	40.81+/-1.09	0	1431.71	3	478.244	#N/A	41.09	5880	2324	3557	0	0	0	#N/A	7e-06	VACV			FALSE
20221010_MS_zenoSWATH_DC24_VACV_41C_r2.wiff	41C_r2	SAPMNVDNLIMIV	13	C61H105N15O20S2	SAPM[+16]NVDNLIMIV	SAPM(unimod:35)NVDNLIMIV	SAPM[Oxi]NVDNLIMIV	SAPM[Oxidation (M)]NVDNLIMIV	0.7127	0.8391	#N/A	40.81+/-1.09	0	1431.71	3	478.244	#N/A	41.09	5772	3248	2523	0	0	0	#N/A	8e-06	VACV			FALSE
20221010_MS_zenoSWATH_DC24_VACV_41C_r3.wiff	41C_r3	SAPMNVDNLIMIV	13	C61H105N15O20S2	SAPM[+16]NVDNLIMIV	SAPM(unimod:35)NVDNLIMIV	SAPM[Oxi]NVDNLIMIV	SAPM[Oxidation (M)]NVDNLIMIV	0.824	0.8561	#N/A	40.81+/-1.09	0	1431.71	3	478.244	#N/A	41.09	4713	1807	2906	0	0	0	#N/A	7e-06	VACV			FALSE
20221010_MS_zenoSWATH_DC24_VACV_45C_r1.wiff	45C_r1	SAPMNVDNLIMIV	13	C61H105N15O20S2	SAPM[+16]NVDNLIMIV	SAPM(unimod:35)NVDNLIMIV	SAPM[Oxi]NVDNLIMIV	SAPM[Oxidation (M)]NVDNLIMIV	0.8701	0.7574	#N/A	40.81+/-1.09	0	1431.71	3	478.244	#N/A	41.09	4486	2584	1901	0	0	0	#N/A	5e-06	VACV			FALSE
20221010_MS_zenoSWATH_DC24_VACV_45C_r2.wiff	45C_r2	SAPMNVDNLIMIV	13	C61H105N15O20S2	SAPM[+16]NVDNLIMIV	SAPM(unimod:35)NVDNLIMIV	SAPM[Oxi]NVDNLIMIV	SAPM[Oxidation (M)]NVDNLIMIV	0.7203	0.8388	#N/A	40.81+/-1.09	0	1431.71	3	478.244	#N/A	41.09	3146	1376	1770	23	23	0	#N/A	5e-06	VACV			FALSE
20221010_MS_zenoSWATH_DC24_VACV_45C_r3.wiff	45C_r3	SAPMNVDNLIMIV	13	C61H105N15O20S2	SAPM[+16]NVDNLIMIV	SAPM(unimod:35)NVDNLIMIV	SAPM[Oxi]NVDNLIMIV	SAPM[Oxidation (M)]NVDNLIMIV	0.5051	0.8438	#N/A	40.81+/-1.09	0	1431.71	3	478.244	#N/A	41.09	2917	1762	1155	484	484	0	#N/A	3e-06	VACV			FALSE
20221010_MS_zenoSWATH_DC24_VACV_49C_r1.wiff	49C_r1	SAPMNVDNLIMIV	13	C61H105N15O20S2	SAPM[+16]NVDNLIMIV	SAPM(unimod:35)NVDNLIMIV	SAPM[Oxi]NVDNLIMIV	SAPM[Oxidation (M)]NVDNLIMIV	0.5493	0.6907	#N/A	40.81+/-1.09	0	1431.71	3	478.244	#N/A	41.09	2144	1390	754	0	0	0	#N/A	5e-06	VACV			FALSE
20221010_MS_zenoSWATH_DC24_VACV_49C_r2.wiff	49C_r2	SAPMNVDNLIMIV	13	C61H105N15O20S2	SAPM[+16]NVDNLIMIV	SAPM(unimod:35)NVDNLIMIV	SAPM[Oxi]NVDNLIMIV	SAPM[Oxidation (M)]NVDNLIMIV	0.435	0.7804	#N/A	40.81+/-1.09	0.0003	1431.71	3	478.244	#N/A	41.09	766	604	162	0	0	0	#N/A	1e-06	VACV			FALSE
20221010_MS_zenoSWATH_DC24_VACV_49C_r3.wiff	49C_r3	SAPMNVDNLIMIV	13	C61H105N15O20S2	SAPM[+16]NVDNLIMIV	SAPM(unimod:35)NVDNLIMIV	SAPM[Oxi]NVDNLIMIV	SAPM[Oxidation (M)]NVDNLIMIV	0.3582	0.5926	#N/A	40.81+/-1.09	0	1431.71	3	478.244	#N/A	41.09	904	708	196	0	0	0	#N/A	2e-06	VACV			FALSE
20221010_MS_zenoSWATH_DC24_VACV_53C_r1.wiff	53C_r1	SAPMNVDNLIMIV	13	C61H105N15O20S2	SAPM[+16]NVDNLIMIV	SAPM(unimod:35)NVDNLIMIV	SAPM[Oxi]NVDNLIMIV	SAPM[Oxidation (M)]NVDNLIMIV	0	0.5598	#N/A	40.81+/-1.09	0	1431.71	3	478.244	#N/A	41.09	409	409	0	0	0	0	#N/A	1e-06	VACV			FALSE
20221010_MS_zenoSWATH_DC24_VACV_53C_r2.wiff	53C_r2	SAPMNVDNLIMIV	13	C61H105N15O20S2	SAPM[+16]NVDNLIMIV	SAPM(unimod:35)NVDNLIMIV	SAPM[Oxi]NVDNLIMIV	SAPM[Oxidation (M)]NVDNLIMIV	0	0.5958	#N/A	40.81+/-1.09	0.0002	1431.71	3	478.244	#N/A	41.09	652	652	0	0	0	0	#N/A	2e-06	VACV			FALSE
20221010_MS_zenoSWATH_DC24_VACV_53C_r3.wiff	53C_r3	SAPMNVDNLIMIV	13	C61H105N15O20S2	SAPM[+16]NVDNLIMIV	SAPM(unimod:35)NVDNLIMIV	SAPM[Oxi]NVDNLIMIV	SAPM[Oxidation (M)]NVDNLIMIV	0	0.5817	#N/A	40.81+/-1.09	0	1431.71	3	478.244	#N/A	41.09	173	173	0	0	0	0	#N/A	1e-06	VACV			FALSE
20221010_MS_zenoSWATH_DC24_VACV_57C_r1.wiff	57C_r1	SAPMNVDNLIMIV	13	C61H105N15O20S2	SAPM[+16]NVDNLIMIV	SAPM(unimod:35)NVDNLIMIV	SAPM[Oxi]NVDNLIMIV	SAPM[Oxidation (M)]NVDNLIMIV	0.2852	0.5789	#N/A	40.81+/-1.09	0.0304	1431.71	3	478.244	#N/A	41.09	1024	703	321	37	37	0	#N/A	4e-06	VACV			FALSE
20221010_MS_zenoSWATH_DC24_VACV_57C_r2.wiff	57C_r2	SAPMNVDNLIMIV	13	C61H105N15O20S2	SAPM[+16]NVDNLIMIV	SAPM(unimod:35)NVDNLIMIV	SAPM[Oxi]NVDNLIMIV	SAPM[Oxidation (M)]NVDNLIMIV	0	0.4739	#N/A	40.81+/-1.09	0.0979	1431.71	3	478.244	#N/A	41.09	117	117	0	0	0	0	#N/A	1e-06	VACV			FALSE
20221010_MS_zenoSWATH_DC24_VACV_57C_r3.wiff	57C_r3	SAPMNVDNLIMIV	13	C61H105N15O20S2	SAPM[+16]NVDNLIMIV	SAPM(unimod:35)NVDNLIMIV	SAPM[Oxi]NVDNLIMIV	SAPM[Oxidation (M)]NVDNLIMIV	0	0.572	#N/A	40.81+/-1.09	0.0148	1431.71	3	478.244	#N/A	41.09	437	437	0	0	0	0	#N/A	2e-06	VACV			FALSE
20221010_MS_zenoSWATH_DC24_VACV_61C_r1.wiff	61C_r1	SAPMNVDNLIMIV	13	C61H105N15O20S2	SAPM[+16]NVDNLIMIV	SAPM(unimod:35)NVDNLIMIV	SAPM[Oxi]NVDNLIMIV	SAPM[Oxidation (M)]NVDNLIMIV	0.1775	0.595	#N/A	40.81+/-1.09	0.0765	1431.71	3	478.244	#N/A	41.09	85	69	16	108	108	0	#N/A	0	VACV			FALSE
20221010_MS_zenoSWATH_DC24_VACV_61C_r2.wiff	61C_r2	SAPMNVDNLIMIV	13	C61H105N15O20S2	SAPM[+16]NVDNLIMIV	SAPM(unimod:35)NVDNLIMIV	SAPM[Oxi]NVDNLIMIV	SAPM[Oxidation (M)]NVDNLIMIV	0	0.6598	#N/A	40.81+/-1.09	0.2647	1431.71	3	478.244	#N/A	41.09	261	261	0	30	30	0	#N/A	1e-06	VACV			FALSE
20221010_MS_zenoSWATH_DC24_VACV_61C_r3.wiff	61C_r3	SAPMNVDNLIMIV	13	C61H105N15O20S2	SAPM[+16]NVDNLIMIV	SAPM(unimod:35)NVDNLIMIV	SAPM[Oxi]NVDNLIMIV	SAPM[Oxidation (M)]NVDNLIMIV	0	0.5231	#N/A	40.81+/-1.09	0.043	1431.71	3	478.244	#N/A	41.09	120	120	0	0	0	0	#N/A	0	VACV			FALSE
20221010_MS_zenoSWATH_DC24_VACV_65C_r1.wiff	65C_r1	SAPMNVDNLIMIV	13	C61H105N15O20S2	SAPM[+16]NVDNLIMIV	SAPM(unimod:35)NVDNLIMIV	SAPM[Oxi]NVDNLIMIV	SAPM[Oxidation (M)]NVDNLIMIV	0.1775	0.6149	#N/A	40.81+/-1.09	0.1829	1431.71	3	478.244	#N/A	41.09	682	469	213	0	0	0	#N/A	2e-06	VACV			FALSE
20221010_MS_zenoSWATH_DC24_VACV_65C_r2.wiff	65C_r2	SAPMNVDNLIMIV	13	C61H105N15O20S2	SAPM[+16]NVDNLIMIV	SAPM(unimod:35)NVDNLIMIV	SAPM[Oxi]NVDNLIMIV	SAPM[Oxidation (M)]NVDNLIMIV	0	0.5965	#N/A	40.81+/-1.09	0.3503	1431.71	3	478.244	#N/A	41.09	44	44	0	131	131	0	#N/A	0	VACV			FALSE
20221010_MS_zenoSWATH_DC24_VACV_65C_r3.wiff	65C_r3	SAPMNVDNLIMIV	13	C61H105N15O20S2	SAPM[+16]NVDNLIMIV	SAPM(unimod:35)NVDNLIMIV	SAPM[Oxi]NVDNLIMIV	SAPM[Oxidation (M)]NVDNLIMIV	0.1775	0.5681	#N/A	40.81+/-1.09	0.1798	1431.71	3	478.244	#N/A	41.09	414	260	154	0	0	0	#N/A	1e-06	VACV			FALSE
20221010_MS_zenoSWATH_DC24_VACV_69C_r1.wiff	69C_r1	SAPMNVDNLIMIV	13	C61H105N15O20S2	SAPM[+16]NVDNLIMIV	SAPM(unimod:35)NVDNLIMIV	SAPM[Oxi]NVDNLIMIV	SAPM[Oxidation (M)]NVDNLIMIV	0	0.5685	#N/A	40.81+/-1.09	0.1669	1431.71	3	478.244	#N/A	41.09	106	106	0	0	0	0	#N/A	0	VACV			FALSE
20221010_MS_zenoSWATH_DC24_VACV_69C_r2.wiff	69C_r2	SAPMNVDNLIMIV	13	C61H105N15O20S2	SAPM[+16]NVDNLIMIV	SAPM(unimod:35)NVDNLIMIV	SAPM[Oxi]NVDNLIMIV	SAPM[Oxidation (M)]NVDNLIMIV	0.1775	0.5193	#N/A	40.81+/-1.09	0.004	1431.71	3	478.244	#N/A	41.09	176	119	56	0	0	0	#N/A	1e-06	VACV			FALSE
20221010_MS_zenoSWATH_DC24_VACV_69C_r3.wiff	69C_r3	SAPMNVDNLIMIV	13	C61H105N15O20S2	SAPM[+16]NVDNLIMIV	SAPM(unimod:35)NVDNLIMIV	SAPM[Oxi]NVDNLIMIV	SAPM[Oxidation (M)]NVDNLIMIV	0	0.4739	#N/A	40.81+/-1.09	0.3995	1431.71	3	478.244	#N/A	41.09	22	22	0	0	0	0	#N/A	0	VACV			FALSE
20221010_MS_zenoSWATH_DC24_VACV_73C_r1.wiff	73C_r1	SAPMNVDNLIMIV	13	C61H105N15O20S2	SAPM[+16]NVDNLIMIV	SAPM(unimod:35)NVDNLIMIV	SAPM[Oxi]NVDNLIMIV	SAPM[Oxidation (M)]NVDNLIMIV	0	0.4739	#N/A	40.81+/-1.09	0.1653	1431.71	3	478.244	#N/A	41.09	2	2	0	0	0	0	#N/A	0	VACV			FALSE
20221010_MS_zenoSWATH_DC24_VACV_73C_r2.wiff	73C_r2	SAPMNVDNLIMIV	13	C61H105N15O20S2	SAPM[+16]NVDNLIMIV	SAPM(unimod:35)NVDNLIMIV	SAPM[Oxi]NVDNLIMIV	SAPM[Oxidation (M)]NVDNLIMIV	0	0.4739	#N/A	40.81+/-1.09	0.2668	1431.71	3	478.244	#N/A	41.09	23	23	0	0	0	0	#N/A	0	VACV			FALSE
20221010_MS_zenoSWATH_DC24_VACV_73C_r3.wiff	73C_r3	SAPMNVDNLIMIV	13	C61H105N15O20S2	SAPM[+16]NVDNLIMIV	SAPM(unimod:35)NVDNLIMIV	SAPM[Oxi]NVDNLIMIV	SAPM[Oxidation (M)]NVDNLIMIV	0.289	0.6311	#N/A	40.81+/-1.09	0.0906	1431.71	3	478.244	#N/A	41.09	286	147	139	0	0	0	#N/A	1e-06	VACV			FALSE
20221010_MS_zenoSWATH_DC24_VACV_37C_r1.wiff	37C_r1	SAPMNVDNLIMIV	13	C61H105N15O20S2	SAPMNVDNLIM[+16]IV	SAPMNVDNLIM(unimod:35)IV	SAPMNVDNLIM[Oxi]IV	SAPMNVDNLIM[Oxidation (M)]IV	0.946	0.9874	#N/A	42.76+/-1.21	0.0007	1431.71	2	716.862	#N/A	43.02	53727	33676	20051	0	0	0	#N/A	5.7e-05	VACV			FALSE
20221010_MS_zenoSWATH_DC24_VACV_37C_r2.wiff	37C_r2	SAPMNVDNLIMIV	13	C61H105N15O20S2	SAPMNVDNLIM[+16]IV	SAPMNVDNLIM(unimod:35)IV	SAPMNVDNLIM[Oxi]IV	SAPMNVDNLIM[Oxidation (M)]IV	0.819	0.9863	#N/A	42.76+/-1.21	0.0001	1431.71	2	716.862	#N/A	43.02	38518	20631	17887	376	376	0	#N/A	6e-05	VACV			FALSE
20221010_MS_zenoSWATH_DC24_VACV_37C_r3.wiff	37C_r3	SAPMNVDNLIMIV	13	C61H105N15O20S2	SAPMNVDNLIM[+16]IV	SAPMNVDNLIM(unimod:35)IV	SAPMNVDNLIM[Oxi]IV	SAPMNVDNLIM[Oxidation (M)]IV	0.8836	0.9875	#N/A	42.76+/-1.21	0.0006	1431.71	2	716.862	#N/A	43.02	66324	38929	27395	0	0	0	#N/A	8.7e-05	VACV			FALSE
20221010_MS_zenoSWATH_DC24_VACV_41C_r1.wiff	41C_r1	SAPMNVDNLIMIV	13	C61H105N15O20S2	SAPMNVDNLIM[+16]IV	SAPMNVDNLIM(unimod:35)IV	SAPMNVDNLIM[Oxi]IV	SAPMNVDNLIM[Oxidation (M)]IV	0.9586	0.9947	#N/A	42.76+/-1.21	0.0001	1431.71	2	716.862	#N/A	43.02	245782	146281	99502	110	110	0	#N/A	0.0003	VACV			FALSE
20221010_MS_zenoSWATH_DC24_VACV_41C_r2.wiff	41C_r2	SAPMNVDNLIMIV	13	C61H105N15O20S2	SAPMNVDNLIM[+16]IV	SAPMNVDNLIM(unimod:35)IV	SAPMNVDNLIM[Oxi]IV	SAPMNVDNLIM[Oxidation (M)]IV	0.9413	0.9953	#N/A	42.76+/-1.21	0.0001	1431.71	2	716.862	#N/A	43.02	257367	150481	106886	0	0	0	#N/A	0.000369	VACV			FALSE
20221010_MS_zenoSWATH_DC24_VACV_41C_r3.wiff	41C_r3	SAPMNVDNLIMIV	13	C61H105N15O20S2	SAPMNVDNLIM[+16]IV	SAPMNVDNLIM(unimod:35)IV	SAPMNVDNLIM[Oxi]IV	SAPMNVDNLIM[Oxidation (M)]IV	0.9472	0.9957	#N/A	42.76+/-1.21	0	1431.71	2	716.862	#N/A	43.02	219134	130777	88357	687	687	0	#N/A	0.000309	VACV			FALSE
20221010_MS_zenoSWATH_DC24_VACV_45C_r1.wiff	45C_r1	SAPMNVDNLIMIV	13	C61H105N15O20S2	SAPMNVDNLIM[+16]IV	SAPMNVDNLIM(unimod:35)IV	SAPMNVDNLIM[Oxi]IV	SAPMNVDNLIM[Oxidation (M)]IV	0.9601	0.9957	#N/A	42.76+/-1.21	0.002	1431.71	2	716.862	#N/A	43.02	154865	91453	63412	0	0	0	#N/A	0.000169	VACV			FALSE
20221010_MS_zenoSWATH_DC24_VACV_45C_r2.wiff	45C_r2	SAPMNVDNLIMIV	13	C61H105N15O20S2	SAPMNVDNLIM[+16]IV	SAPMNVDNLIM(unimod:35)IV	SAPMNVDNLIM[Oxi]IV	SAPMNVDNLIM[Oxidation (M)]IV	0.9552	0.9924	#N/A	42.76+/-1.21	0	1431.71	2	716.862	#N/A	43.02	158177	94130	64046	80	80	0	#N/A	0.000275	VACV			FALSE
20221010_MS_zenoSWATH_DC24_VACV_45C_r3.wiff	45C_r3	SAPMNVDNLIMIV	13	C61H105N15O20S2	SAPMNVDNLIM[+16]IV	SAPMNVDNLIM(unimod:35)IV	SAPMNVDNLIM[Oxi]IV	SAPMNVDNLIM[Oxidation (M)]IV	0.9267	0.9907	#N/A	42.76+/-1.21	0	1431.71	2	716.862	#N/A	43.02	152570	89788	62782	82	82	0	#N/A	0.000176	VACV			FALSE
20221010_MS_zenoSWATH_DC24_VACV_49C_r1.wiff	49C_r1	SAPMNVDNLIMIV	13	C61H105N15O20S2	SAPMNVDNLIM[+16]IV	SAPMNVDNLIM(unimod:35)IV	SAPMNVDNLIM[Oxi]IV	SAPMNVDNLIM[Oxidation (M)]IV	0.9237	0.9882	#N/A	42.76+/-1.21	0	1431.71	2	716.862	#N/A	43.02	108024	64192	43832	299	299	0	#N/A	0.000227	VACV			FALSE
20221010_MS_zenoSWATH_DC24_VACV_49C_r2.wiff	49C_r2	SAPMNVDNLIMIV	13	C61H105N15O20S2	SAPMNVDNLIM[+16]IV	SAPMNVDNLIM(unimod:35)IV	SAPMNVDNLIM[Oxi]IV	SAPMNVDNLIM[Oxidation (M)]IV	0.8382	0.9974	#N/A	42.76+/-1.21	0.0009	1431.71	2	716.862	#N/A	43.02	62177	38585	23591	0	0	0	#N/A	0.0001	VACV			FALSE
20221010_MS_zenoSWATH_DC24_VACV_49C_r3.wiff	49C_r3	SAPMNVDNLIMIV	13	C61H105N15O20S2	SAPMNVDNLIM[+16]IV	SAPMNVDNLIM(unimod:35)IV	SAPMNVDNLIM[Oxi]IV	SAPMNVDNLIM[Oxidation (M)]IV	0.9297	0.987	#N/A	42.76+/-1.21	0	1431.71	2	716.862	#N/A	43.02	58515	34719	23796	0	0	0	#N/A	0.000133	VACV			FALSE
20221010_MS_zenoSWATH_DC24_VACV_53C_r1.wiff	53C_r1	SAPMNVDNLIMIV	13	C61H105N15O20S2	SAPMNVDNLIM[+16]IV	SAPMNVDNLIM(unimod:35)IV	SAPMNVDNLIM[Oxi]IV	SAPMNVDNLIM[Oxidation (M)]IV	0.678	0.9415	#N/A	42.76+/-1.21	0.0528	1431.71	2	716.862	#N/A	43.02	6687	4484	2203	27	27	0	#N/A	1.3e-05	VACV			FALSE
20221010_MS_zenoSWATH_DC24_VACV_53C_r2.wiff	53C_r2	SAPMNVDNLIMIV	13	C61H105N15O20S2	SAPMNVDNLIM[+16]IV	SAPMNVDNLIM(unimod:35)IV	SAPMNVDNLIM[Oxi]IV	SAPMNVDNLIM[Oxidation (M)]IV	0.8579	0.9703	#N/A	42.76+/-1.21	0.0014	1431.71	2	716.862	#N/A	43.02	15647	9813	5834	0	0	0	#N/A	3.8e-05	VACV			FALSE
20221010_MS_zenoSWATH_DC24_VACV_53C_r3.wiff	53C_r3	SAPMNVDNLIMIV	13	C61H105N15O20S2	SAPMNVDNLIM[+16]IV	SAPMNVDNLIM(unimod:35)IV	SAPMNVDNLIM[Oxi]IV	SAPMNVDNLIM[Oxidation (M)]IV	0.829	0.9735	#N/A	42.76+/-1.21	0.0106	1431.71	2	716.862	#N/A	43.02	10212	6320	3891	0	0	0	#N/A	3.5e-05	VACV			FALSE
20221010_MS_zenoSWATH_DC24_VACV_57C_r1.wiff	57C_r1	SAPMNVDNLIMIV	13	C61H105N15O20S2	SAPMNVDNLIM[+16]IV	SAPMNVDNLIM(unimod:35)IV	SAPMNVDNLIM[Oxi]IV	SAPMNVDNLIM[Oxidation (M)]IV	0.7052	0.9438	#N/A	42.76+/-1.21	0.0222	1431.71	2	716.862	#N/A	43.02	10750	7973	2777	330	330	0	#N/A	4.2e-05	VACV			FALSE
20221010_MS_zenoSWATH_DC24_VACV_57C_r2.wiff	57C_r2	SAPMNVDNLIMIV	13	C61H105N15O20S2	SAPMNVDNLIM[+16]IV	SAPMNVDNLIM(unimod:35)IV	SAPMNVDNLIM[Oxi]IV	SAPMNVDNLIM[Oxidation (M)]IV	0.4332	0.5325	#N/A	42.76+/-1.21	0.2661	1431.71	2	716.862	#N/A	43.02	584	301	283	934	934	0	#N/A	3e-06	VACV			FALSE
20221010_MS_zenoSWATH_DC24_VACV_57C_r3.wiff	57C_r3	SAPMNVDNLIMIV	13	C61H105N15O20S2	SAPMNVDNLIM[+16]IV	SAPMNVDNLIM(unimod:35)IV	SAPMNVDNLIM[Oxi]IV	SAPMNVDNLIM[Oxidation (M)]IV	0.5858	0.8149	#N/A	42.76+/-1.21	0.1074	1431.71	2	716.862	#N/A	43.02	5650	4358	1291	463	463	0	#N/A	2.3e-05	VACV			FALSE
20221010_MS_zenoSWATH_DC24_VACV_61C_r1.wiff	61C_r1	SAPMNVDNLIMIV	13	C61H105N15O20S2	SAPMNVDNLIM[+16]IV	SAPMNVDNLIM(unimod:35)IV	SAPMNVDNLIM[Oxi]IV	SAPMNVDNLIM[Oxidation (M)]IV	0.8046	0.7872	#N/A	42.76+/-1.21	0.0225	1431.71	2	716.862	#N/A	43.02	7116	5225	1891	81	81	0	#N/A	1.8e-05	VACV			FALSE
20221010_MS_zenoSWATH_DC24_VACV_61C_r2.wiff	61C_r2	SAPMNVDNLIMIV	13	C61H105N15O20S2	SAPMNVDNLIM[+16]IV	SAPMNVDNLIM(unimod:35)IV	SAPMNVDNLIM[Oxi]IV	SAPMNVDNLIM[Oxidation (M)]IV	0.432	0.8105	#N/A	42.76+/-1.21	0.1237	1431.71	2	716.862	#N/A	43.02	3218	1471	1746	1363	1363	0	#N/A	1e-05	VACV			FALSE
20221010_MS_zenoSWATH_DC24_VACV_61C_r3.wiff	61C_r3	SAPMNVDNLIMIV	13	C61H105N15O20S2	SAPMNVDNLIM[+16]IV	SAPMNVDNLIM(unimod:35)IV	SAPMNVDNLIM[Oxi]IV	SAPMNVDNLIM[Oxidation (M)]IV	0.5791	0.6899	#N/A	42.76+/-1.21	0.0866	1431.71	2	716.862	#N/A	43.02	3182	1745	1437	983	983	0	#N/A	1.1e-05	VACV			FALSE
20221010_MS_zenoSWATH_DC24_VACV_65C_r1.wiff	65C_r1	SAPMNVDNLIMIV	13	C61H105N15O20S2	SAPMNVDNLIM[+16]IV	SAPMNVDNLIM(unimod:35)IV	SAPMNVDNLIM[Oxi]IV	SAPMNVDNLIM[Oxidation (M)]IV	0.7466	0.8806	#N/A	42.76+/-1.21	0.0801	1431.71	2	716.862	#N/A	43.02	7203	4649	2553	1852	1533	319	#N/A	2.4e-05	VACV			FALSE
20221010_MS_zenoSWATH_DC24_VACV_65C_r2.wiff	65C_r2	SAPMNVDNLIMIV	13	C61H105N15O20S2	SAPMNVDNLIM[+16]IV	SAPMNVDNLIM(unimod:35)IV	SAPMNVDNLIM[Oxi]IV	SAPMNVDNLIM[Oxidation (M)]IV	0.2832	0.7309	#N/A	42.76+/-1.21	0.3995	1431.71	2	716.862	#N/A	43.02	286	199	87	53	53	0	#N/A	2e-06	VACV			FALSE
20221010_MS_zenoSWATH_DC24_VACV_65C_r3.wiff	65C_r3	SAPMNVDNLIMIV	13	C61H105N15O20S2	SAPMNVDNLIM[+16]IV	SAPMNVDNLIM(unimod:35)IV	SAPMNVDNLIM[Oxi]IV	SAPMNVDNLIM[Oxidation (M)]IV	0.4595	0.8295	#N/A	42.76+/-1.21	0.2443	1431.71	2	716.862	#N/A	43.02	558	56	502	32	16	16	#N/A	2e-06	VACV			FALSE
20221010_MS_zenoSWATH_DC24_VACV_69C_r1.wiff	69C_r1	SAPMNVDNLIMIV	13	C61H105N15O20S2	SAPMNVDNLIM[+16]IV	SAPMNVDNLIM(unimod:35)IV	SAPMNVDNLIM[Oxi]IV	SAPMNVDNLIM[Oxidation (M)]IV	0.7732	0.7231	#N/A	42.76+/-1.21	0.0471	1431.71	2	716.862	#N/A	43.02	4390	2952	1437	350	350	0	#N/A	1.7e-05	VACV			FALSE
20221010_MS_zenoSWATH_DC24_VACV_69C_r2.wiff	69C_r2	SAPMNVDNLIMIV	13	C61H105N15O20S2	SAPMNVDNLIM[+16]IV	SAPMNVDNLIM(unimod:35)IV	SAPMNVDNLIM[Oxi]IV	SAPMNVDNLIM[Oxidation (M)]IV	0.3685	0.606	#N/A	42.76+/-1.21	0.3108	1431.71	2	716.862	#N/A	43.02	2907	1843	1064	438	438	0	#N/A	1.1e-05	VACV			FALSE
20221010_MS_zenoSWATH_DC24_VACV_69C_r3.wiff	69C_r3	SAPMNVDNLIMIV	13	C61H105N15O20S2	SAPMNVDNLIM[+16]IV	SAPMNVDNLIM(unimod:35)IV	SAPMNVDNLIM[Oxi]IV	SAPMNVDNLIM[Oxidation (M)]IV	0.2212	0.6769	#N/A	42.76+/-1.21	0.4098	1431.71	2	716.862	#N/A	43.02	576	351	226	18	18	0	#N/A	5e-06	VACV			FALSE
20221010_MS_zenoSWATH_DC24_VACV_73C_r1.wiff	73C_r1	SAPMNVDNLIMIV	13	C61H105N15O20S2	SAPMNVDNLIM[+16]IV	SAPMNVDNLIM(unimod:35)IV	SAPMNVDNLIM[Oxi]IV	SAPMNVDNLIM[Oxidation (M)]IV	0.3178	0.5245	#N/A	42.76+/-1.21	0.2643	1431.71	2	716.862	#N/A	43.02	305	58	247	0	0	0	#N/A	2e-06	VACV			FALSE
20221010_MS_zenoSWATH_DC24_VACV_73C_r2.wiff	73C_r2	SAPMNVDNLIMIV	13	C61H105N15O20S2	SAPMNVDNLIM[+16]IV	SAPMNVDNLIM(unimod:35)IV	SAPMNVDNLIM[Oxi]IV	SAPMNVDNLIM[Oxidation (M)]IV	0.5557	0.6123	#N/A	42.76+/-1.21	0.1816	1431.71	2	716.862	#N/A	43.02	2599	1279	1320	60	60	0	#N/A	2.1e-05	VACV			FALSE
20221010_MS_zenoSWATH_DC24_VACV_73C_r3.wiff	73C_r3	SAPMNVDNLIMIV	13	C61H105N15O20S2	SAPMNVDNLIM[+16]IV	SAPMNVDNLIM(unimod:35)IV	SAPMNVDNLIM[Oxi]IV	SAPMNVDNLIM[Oxidation (M)]IV	0.4424	0.5372	#N/A	42.76+/-1.21	0.1884	1431.71	2	716.862	#N/A	43.02	1370	148	1222	0	0	0	#N/A	5e-06	VACV			FALSE
20221010_MS_zenoSWATH_DC24_VACV_37C_r1.wiff	37C_r1	SAPMNVDNLIMIV	13	C61H105N15O21S2	SAPM[+16]NVDNLIM[+16]IV	SAPM(unimod:35)NVDNLIM(unimod:35)IV	SAPM[Oxi]NVDNLIM[Oxi]IV	SAPM[Oxidation (M)]NVDNLIM[Oxidation (M)]IV	0.9475	0.9945	#N/A	38.27+/-1.17	0	1447.71	2	724.86	#N/A	38.1	1413368	783682	629686	3440	2848	592	#N/A	0.001501	VACV			FALSE
[truncated: 324,938+ more rows]

## Sheet: 5%FDR
File Name	Replicate Name	Peptide Sequence	Peptide Sequence Length	Molecule Formula	Peptide Modified Sequence	Peptide Modified Sequence Unimod Ids	Peptide Modified Sequence Three Letter Codes	Peptide Modified Sequence Full Names	Library Dot Product	Isotope Dot Product	Ratio Dot Product	Best Retention Time	Detection Q Value	Precursor Neutral Mass	Precursor Charge	Precursor Mz	Precursor Normalized Area	Predicted Retention Time	Total Area	Total Area MS1	Total Area Fragment	Total Background	Total Background MS1	Total Background Fragment	Total Area Ratio	Total Area Normalized	Protein Name	Protein Accession	Protein Species	Is Decoy
[truncated: 63,079 more rows]
