# Supplementary material for: Mass spectrometry-based thermostability profiling of virus-derived MHC peptide complexes serves as an effective predictor of immunogenicity
Source: Research Square preprint supplement (doi:10.21203/rs.3.rs-5824434/v1), 2025-02-03
Supplement: Supplementary file 6 [file cceaa57c022bcff610c3faea.xlsx]

## Sheet: VACV-Tm-SWATHvsMRM
SWATH	Tm		MRMhr	Tm		Joint	Tm - average		only MRMhr	Tm		only SWATH	Tm		Merged (SWATH + 12 unique IDs from MRMhr)	Tm
VHIYFVSL	42.7004		TSYKFESV	51.6307		VHIYFVSL	42.8481		YSQVNKRYI	57.6227		INYVETKYF	39.5051		VHIYFVSL	42.7004		Joint: commonly profiled by both SWATH and MRM
INYVETKYF	39.5051		ITYRFYLINL	64.6795		SSFVKKFGL	42.8867		NNIFRTNL	51.1485		LSHFYPAV	44.3343		INYVETKYF	39.5051
SSFVKKFGL	40.2912		KNYLFNAI	48.1826		TSYKFESV	52.4108		PNTSIKEIK	45.4845		LFKNLATSI	40.6872		SSFVKKFGL	40.2912
STLSVVHEL	48.8283		DLFPSFVRL	48.0378		ITYRFYLINL	64.4279		NTPNNTTTI	51.3402		MITMSAFL	42.9525		STLSVVHEL	48.8283
LSHFYPAV	44.3343		YAHINALEYI	53.9744		KNYLFNAI	48.8824		AQDYDQYI	55.9852		VGINLVEKI	41.2687		LSHFYPAV	44.3343
TSYKFESV	53.1908		SDLFPSFVRL	48.5915		DLFPSFVRL	47.9294		LRYLLFGI	48.7123		ALYYVHSL	40.4539		TSYKFESV	53.1908
ITYRFYLINL	64.1762		VISDLFPSFVRL	53.0969		YAHINALEYI	54.279		SMSQELAEL	48.4871		IAPRSGLSL	40.8277		ITYRFYLINL	64.1762
KNYLFNAI	49.5823		AAFEFINSL	52.0825		SDLFPSFVRL	49.3516		NLSLGKSPLPSL	50.7082		KCIEYVTL	47.9077		KNYLFNAI	49.5823
DLFPSFVRL	47.8211		ITYRFYLI	45.1461		VISDLFPSFVRL	52.8266		NMFAANRDNVA	41.4603		STLSVVHEL	48.8283		DLFPSFVRL	47.8211
YAHINALEYI	54.5835		KSYNYMLL	49.1191		AAFEFINSL	52.2269		KSIEIAKEL	46.4615					YAHINALEYI	54.5835
SDLFPSFVRL	50.1117		YSQVNKRYI	57.6227		ITYRFYLI	46.8176		SNLKHIGNHI	55.246					SDLFPSFVRL	50.1117
VISDLFPSFVRL	52.5564		YSLPNAGDVI	50.2719		KSYNYMLL	50.7285		SGGGNLTEI	41.9801					VISDLFPSFVRL	52.5564
AAFEFINSL	52.3712		LNFRFENV	47.316		YSLPNAGDVI	51.0006								AAFEFINSL	52.3712
ITYRFYLI	48.4892		SIFRFLNI	57.0094		LNFRFENV	47.9344								ITYRFYLI	48.4892
KSYNYMLL	52.3379		IGMFNLTFI	50.0111		SIFRFLNI	56.0577								KSYNYMLL	52.3379
YSLPNAGDVI	51.7292		VIYIFTVRL	63.2937		IGMFNLTFI	49.9678								YSLPNAGDVI	51.7292
LNFRFENV	48.5529		SQIVDDDFI	44.1865		VIYIFTVRL	63.6955								LNFRFENV	48.5529
SIFRFLNI	55.1061		VTKYYINL	45.2644		SQIVDDDFI	43.9362								SIFRFLNI	55.1061
IGMFNLTFI	49.9245		SAPMNVDNLIM	50.012		VTKYYINL	45.0147								IGMFNLTFI	49.9245
VIYIFTVRL	64.0973		YSPSNHHILL	43.7475		SAPMNVDNLIM	50.0141								VIYIFTVRL	64.0973
SQIVDDDFI	43.6859		NNIFRTNL	51.1485		YSPSNHHILL	45.09								SQIVDDDFI	43.6859
VTKYYINL	44.7649		LSYIYNML	50.544		LSYIYNML	50.9086								VTKYYINL	44.7649
SAPMNVDNLIM	50.0161		SAPMNVDNLIMIV	46.8055		SAPMNVDNLIMIV	46.3224								SAPMNVDNLIM	50.0161
YSPSNHHILL	46.4325		FKLILAEYI	43.8816		FKLILAEYI	44.4289								YSPSNHHILL	46.4325
LSYIYNML	51.2732		TGPVGQLWM	40.1313		TGPVGQLWM	39.687								LSYIYNML	51.2732
SAPMNVDNLIMIV	45.8393		YAPVSPIVI	50.37		YAPVSPIVI	51.2383								SAPMNVDNLIMIV	45.8393
FKLILAEYI	44.9761		AIVNYANL	48.3472		AIVNYANL	49.0104								FKLILAEYI	44.9761
TGPVGQLWM	39.2427		SAPMNVDNLI	50.7025		SAPMNVDNLI	51.4522								TGPVGQLWM	39.2427
YAPVSPIVI	52.1065		LNYVDYNI	62.6608		LNYVDYNI	57.5233								YAPVSPIVI	52.1065
AIVNYANL	49.6735		NQMVNTVLI	49.7544		NQMVNTVLI	49.9525								AIVNYANL	49.6735
SAPMNVDNLI	52.2019		MMINPFMI	51.4692		MMINPFMI	52.3362								SAPMNVDNLI	52.2019
LNYVDYNI	52.3857		VHIYFVSL	42.9959		SAPMNVDNLIMI	47.6361								LNYVDYNI	52.3857
NQMVNTVLI	50.1505		SAPMNVDNLIMI	47.6192		SAPMNVDNL	56.6378								NQMVNTVLI	50.1505
MMINPFMI	53.2033		SAPMNVDNL	56.2751		IMFSKSLNF	44.9472								MMINPFMI	53.2033
SAPMNVDNLIMI	47.6529		IMFSKSLNF	44.8305		MALLFKNL	47.777								SAPMNVDNLIMI	47.6529
SAPMNVDNL	57.0005		MALLFKNL	47.3552		FLMMNKDEL	48.2255								SAPMNVDNL	57.0005
IMFSKSLNF	45.064		FLMMNKDEL	48.1775		LMYIFAAL	52.6105								IMFSKSLNF	45.064
MALLFKNL	48.1988		LMYIFAAL	52.5689		TMMINPFMI	47.7317								MALLFKNL	48.1988
FLMMNKDEL	48.2734		TMMINPFMI	47.3845		GSPTNLEFI	50.8208								FLMMNKDEL	48.2734
LMYIFAAL	52.652		GSPTNLEFI	50.4729		VSLDYINTM	52.8478								LMYIFAAL	52.652
TMMINPFMI	48.0788		VSLDYINTM	53.0145		TIVDFLSRL	54.5293								TMMINPFMI	48.0788
GSPTNLEFI	51.1687		TIVDFLSRL	55.6803		VMVTITQNV	49.1874								GSPTNLEFI	51.1687
VSLDYINTM	52.6811		VMVTITQNV	48.86		SQYEYTTV	49.7042								VSLDYINTM	52.6811
TIVDFLSRL	53.3784		SQYEYTTV	51.3673		YGVSNFKIGM	50.4581								TIVDFLSRL	53.3784
VMVTITQNV	49.5149		YGVSNFKIGM	50.1001		APGSPTNLEFI	40.1409								VMVTITQNV	49.5149
SQYEYTTV	48.0412		APGSPTNLEFI	40.4977		SAPFDSVFYL	50.6003								SQYEYTTV	48.0412
YGVSNFKIGM	50.8161		SAPFDSVFYL	50.2399		NAVSNKYEL	50.291								YGVSNFKIGM	50.8161
LFKNLATSI	40.6872		NAVSNKYEL	51.8412		VNIDQTTPM	44.0267								LFKNLATSI	40.6872
APGSPTNLEFI	39.7841		VNIDQTTPM	43.3834		IMIEISNV	46.6797								APGSPTNLEFI	39.7841
SAPFDSVFYL	50.9607		IMIEISNV	46.2168		IAIVNYANL	50.0034								SAPFDSVFYL	50.9607
NAVSNKYEL	48.7408		IAIVNYANL	49.8673		SMYVIPDEL	50.3058								NAVSNKYEL	48.7408
MITMSAFL	42.9525		SMYVIPDEL	50.0334		IIAVFDSKL	40.2571								MITMSAFL	42.9525
VNIDQTTPM	44.6701		IIAVFDSKL	40.7562		FMRTDMLQNM	57.5162								VNIDQTTPM	44.6701
IMIEISNV	47.1426		FMRTDMLQNM	61.5151		SQGTNPHMI	43.7129								IMIEISNV	47.1426
IAIVNYANL	50.1394		SQGTNPHMI	44.4659		VTIRNVTHI	49.1184								IAIVNYANL	50.1394
SMYVIPDEL	50.5782		VTIRNVTHI	47.5468		SQYYFSML	48.8217								SMYVIPDEL	50.5782
IIAVFDSKL	39.7579		PNTSIKEIK	45.4845		EQFTFSNV	45.9724								IIAVFDSKL	39.7579
FMRTDMLQNM	53.5174		SQYYFSML	48.2066		YIDHIVNI	47.6376								FMRTDMLQNM	53.5174
SQGTNPHMI	42.9599		MSMKYLML	44.6634		VNKYFENPL	45.7395								SQGTNPHMI	42.9599
VTIRNVTHI	50.69		EQFTFSNV	45.5051		ITQYLDFL	50.5193								VTIRNVTHI	50.69
SQYYFSML	49.4368		YIDHIVNI	50.5586		KQYIVATL	44.5122								SQYYFSML	49.4368
KCIEYVTL	47.9077		NTPNNTTTI	51.3402		KTVTNLISETL	49.0331								KCIEYVTL	47.9077
EQFTFSNV	46.4397		VNKYFENPL	46.5025		DVTTFLSM	49.2644								EQFTFSNV	46.4397
YIDHIVNI	44.7165		AQDYDQYI	55.9852		TNVVNISTI	45.1194								YIDHIVNI	44.7165
VNKYFENPL	44.9765		ITQYLDFL	52.1336		RSTINGEQI	49.4787								VNKYFENPL	44.9765
ITQYLDFL	48.905		KQYIVATL	44.6857		KSLVNLEIL	47.3119								ITQYLDFL	48.905
KQYIVATL	44.3387		KTVTNLISETL	48.6802		SFIEVISL	45.6862								KQYIVATL	44.3387
KTVTNLISETL	49.386		LRYLLFGI	48.7123		VGPNNTRSI	44.8054								KTVTNLISETL	49.386
DVTTFLSM	48.9884		DVTTFLSM	49.5404		YAIDVTKVNPL	44.3556								DVTTFLSM	48.9884
TNVVNISTI	45.0038		TNVVNISTI	45.2351		FTLINEEML	44.3178								TNVVNISTI	45.0038
RSTINGEQI	48.0343		RSTINGEQI	50.9232		KTVKNVDII	47.4241								RSTINGEQI	48.0343
KSLVNLEIL	47.6909		KSLVNLEIL	46.9328		SAVINNMQI	51.8849								KSLVNLEIL	47.6909
SFIEVISL	46.1125		SFIEVISL	45.2598		TSSINLSYI	45.3391								SFIEVISL	46.1125
VGINLVEKI	41.2687		SMSQELAEL	48.4871		LQNVMISIL	45.3166								VGINLVEKI	41.2687
VGPNNTRSI	44.4642		NLSLGKSPLPSL	50.7082		GTVVNKEAI	52.4906								VGPNNTRSI	44.4642
YAIDVTKVNPL	44.0514		NMFAANRDNVA	41.4603		KVIGFVSI	42.8866								YAIDVTKVNPL	44.0514
FTLINEEML	44.3235		KSIEIAKEL	46.4615		KAIDFSQM	45.3516								FTLINEEML	44.3235
KTVKNVDII	47.7742		VGPNNTRSI	45.1466		ASLKNFKEL	46.739								KTVKNVDII	47.7742
SAVINNMQI	51.8395		YAIDVTKVNPL	44.6598		SSFTKMAEI	48.6801								SAVINNMQI	51.8395
TSSINLSYI	45.0245		FTLINEEML	44.3121		ISIKLTDSL	41.2646								TSSINLSYI	45.0245
LQNVMISIL	45.0048		SNLKHIGNHI	55.246		SMLSNLTNL	50.9906								LQNVMISIL	45.0048
GTVVNKEAI	52.9558		KTVKNVDII	47.0741		VIYDFLVKT	43.542								GTVVNKEAI	52.9558
KVIGFVSI	42.7695		SAVINNMQI	51.9303		AAIRGNDVI	46.7842								KVIGFVSI	42.7695
KAIDFSQM	44.7462		TSSINLSYI	45.6537		TQNVNAAHL	50.5323								KAIDFSQM	44.7462
ASLKNFKEL	44.9919		LQNVMISIL	45.6285		ECKTHASSI	47.8194								ASLKNFKEL	44.9919
SSFTKMAEI	49.289		GTVVNKEAI	52.0254		QIETGTPFIL	46.4727								SSFTKMAEI	49.289
ISIKLTDSL	41.2557		KVIGFVSI	43.0036		MSMKYLML	43.756								ISIKLTDSL	41.2557
SMLSNLTNL	51.1309		KAIDFSQM	45.9571		ISISDAENM	46.7294								SMLSNLTNL	51.1309
ALYYVHSL	40.4539		ISISDAENM	49.6779		GIGVQGLADAF	46.5225								ALYYVHSL	40.4539
VIYDFLVKT	43.5241		ASLKNFKEL	48.4861											VIYDFLVKT	43.5241
IAPRSGLSL	40.8277		SSFTKMAEI	48.0713											IAPRSGLSL	40.8277
AAIRGNDVI	46.673		ISIKLTDSL	41.2736											AAIRGNDVI	46.673
TQNVNAAHL	50.7845		SMLSNLTNL	50.8504											TQNVNAAHL	50.7845
ECKTHASSI	44.3776		VIYDFLVKT	43.5599											ECKTHASSI	44.3776
QIETGTPFIL	41.1722		SGGGNLTEI	41.9801											QIETGTPFIL	41.1722
MSMKYLML	42.8486		AAIRGNDVI	46.8955											MSMKYLML	42.8486
ISISDAENM	43.781		GIGVQGLADAF	49.509											ISISDAENM	43.781
GIGVQGLADAF	43.5361		TQNVNAAHL	50.2801											GIGVQGLADAF	43.5361
			SSFVKKFGL	45.4822											YSQVNKRYI	57.6227
			ECKTHASSI	51.2613											NNIFRTNL	51.1485
			QIETGTPFIL	51.7731											PNTSIKEIK	45.4845
															NTPNNTTTI	51.3402
															AQDYDQYI	55.9852
															LRYLLFGI	48.7123
															SMSQELAEL	48.4871
															NLSLGKSPLPSL	50.7082
															NMFAANRDNVA	41.4603
															KSIEIAKEL	46.4615
															SNLKHIGNHI	55.246
															SGGGNLTEI	41.9801

## Sheet: VACV all
		H-2-Db							H-2-Kb												by Croft, N.P. et al. PNAS 116, 3112 (2019).
Merged (SWATH data + 12 unique IDs from MRMhr)	Tm	core	icore	EL-score	EL_Rank	BA-score	BA_Rank	H-2Db-BA (nM)	core	icore	EL-score	EL_Rank	BA-score	BA_Rank	H-2Kb-BA (nM)	Ave	NB	H-2Db-binder	H-2Kb-Binder	MHC allele	Experimental BA - IC50	# mice positive, out of 8	Immunogenicity Category	Mean of (% IFNγ of CD8+ response)	Tm from which MS-assay?		Strong binder (SB)
VHIYFVSL	42.7004	VHI-YFVSL	VHIYFVSL	0.0057	10.2067	0.0739	12.4693	22470.7	VHI-YFVSL	VHIYFVSL	0.8403	0.0377	0.7483	0.0409	15.24	0.423	1	NB	SB	H-2Kb	0.5	7	Major	0.152688	SWATH		Weak Binder (WB)
INYVETKYF	39.5051	INYVETKYF	INYVETKYF	0.0162	5.1287	0.0875	9.3792	19399.5	INYVETKYF	INYVETKYF	0.54	0.1993	0.5889	0.2469	85.44	0.2781	1	NB	SB	H-2Kb	4.11762	0	Non	0	SWATH		Non-binder (NB)
SSFVKKFGL	40.2912	SSFVKKFGL	SSFVKKFGL	0.144	0.7061	0.2042	1.5858	5490.35	SSFVKKFGL	SSFVKKFGL	0.6561	0.1118	0.663	0.1135	38.32	0.4	2	NB	SB	H-2Kb	4.89255	0	Non	0	SWATH		Binding Affinity (BA)
STLSVVHEL	48.8283	STLSVVHEL	STLSVVHEL	0.391	0.182	0.2504	0.9847	3327.64	STLSVVHEL	STLSVVHEL	0.4269	0.326	0.4048	1.2691	626.1	0.4089	2	SB	SB	H-2Db	1846.14	0	Non	0	SWATH
LSHFYPAV	44.3343	LSH-FYPAV	LSHFYPAV	0.0009	26.7436	0.0427	27.4805	31504.7	LSH-FYPAV	LSHFYPAV	0.4576	0.282	0.6299	0.1655	54.84	0.2292	1	NB	SB	H-2Kb	51512.2	1	Minor	0.05	SWATH
TSYKFESV	53.1908	TSY-KFESV	TSYKFESV	0.0171	4.9302	0.0899	8.9046	18901	TSYK-FESV	TSYKFESV	0.9603	0.0061	0.8108	0.0145	7.75	0.4887	1	NB	SB	H-2Kb	1.1	8	Major	5.28	SWATH
ITYRFYLINL	64.1762	ITYRFLINL	ITYRFYLINL	0.002	18.3636	0.0861	9.6576	19701.6	ITYRFYLNL	ITYRFYLINL	0.5726	0.1676	0.8367	0.0107	5.85	0.2873	1	NB	SB	H-2Kb	0.5	8	Major	2.93506	SWATH
KNYLFNAI	49.5823	KNY-LFNAI	KNYLFNAI	0.0057	10.1955	0.0813	10.6509	20754.5	KNY-LFNAI	KNYLFNAI	0.9091	0.017	0.8229	0.0127	6.8	0.4574	1	NB	SB	H-2Kb	1.92097	8	Major	2.37006	SWATH
DLFPSFVRL	47.8211	DLFPSFVRL	DLFPSFVRL	0.0132	5.8929	0.0598	17.4331	26192	DLFPSFVRL	DLFPSFVRL	0.62	0.1295	0.5303	0.4221	161.05	0.3166	1	NB	SB	H-2Kb	2.1265	8	Major	1.69006	SWATH
YAHINALEYI	54.5835	YAHINLEYI	YAHINALEYI	0.9131	0.0089	0.8435	0.0055	5.44	YAHINLEYI	YAHINALEYI	0.0028	18.4935	0.1783	10.3078	7259.93	0.458	1	SB	NB	H-2Db	0.5	8	Major	1.4199	SWATH
SDLFPSFVRL	50.1117	SLFPSFVRL	SDLFPSFVRL	0.0194	4.4847	0.0914	8.6314	18602.8	SLFPSFVRL	SDLFPSFVRL	0.3724	0.4153	0.5591	0.3247	118.01	0.1959	1	NB	SB	H-2Kb	0.5	8	Major	1.39006	SWATH
VISDLFPSFVRL	52.5564	VIFPSFVRL	VISDLFPSFVRL	0.0016	20.4241	0.0596	17.516	26243.4	VIFPSFVRL	VISDLFPSFVRL	0.2357	0.7866	0.5892	0.2464	85.22	0.1187	1	NB	NB	H-2Kb	0.719065	8	Major	1.35256	SWATH
AAFEFINSL	52.3712	AAFEFINSL	AAFEFINSL	0.5761	0.0713	0.3673	0.3005	939.56	AAFEFINSL	AAFEFINSL	0.962	0.0059	0.7998	0.0171	8.72	0.769	2	SB	SB	H-2Kb	0.61	8	Major	1.34049	SWATH
ITYRFYLI	48.4892	ITYR-FYLI	ITYRFYLI	0.0048	11.2646	0.1062	6.5321	15846.5	ITYRFY-LI	ITYRFYLI	0.9173	0.015	0.8814	0.0075	3.61	0.461	1	NB	SB	H-2Kb	6.2	8	Major	1.30549	SWATH
KSYNYMLL	52.3379	KSY-NYMLL	KSYNYMLL	0.1223	0.8519	0.2221	1.3022	4520.61	KSYN-YMLL	KSYNYMLL	0.9689	0.0048	0.8864	0.0072	3.42	0.5456	2	NB	SB	H-2Kb	2.7	8	Major	1.17078	SWATH
YSLPNAGDVI	51.7292	YSLPNGDVI	YSLPNAGDVI	0.9161	0.0086	0.7598	0.0084	13.45	YSLPNAGVI	YSLPNAGDVI	0.0011	28.6304	0.114	22.1619	14561.4	0.4586	1	SB	NB	H-2Db	8.4	8	Major	1.11107	SWATH
LNFRFENV	48.5529	LNF-RFENV	LNFRFENV	0.0013	22.7344	0.0569	18.7185	27013.1	LNF-RFENV	LNFRFENV	0.8751	0.0297	0.8159	0.0137	7.33	0.4382	1	NB	SB	H-2Kb	0.84	8	Major	0.909489	SWATH
SIFRFLNI	55.1061	SIFR-FLNI	SIFRFLNI	0.0054	10.4849	0.0978	7.6365	17353.5	SIF-RFLNI	SIFRFLNI	0.9751	0.0038	0.894	0.0067	3.15	0.4903	1	NB	SB	H-2Kb	1.2	8	Major	0.882293	SWATH
IGMFNLTFI	49.9245	IGMFNLTFI	IGMFNLTFI	0.85	0.0154	0.8164	0.0064	7.29	IGMFNLTFI	IGMFNLTFI	0.0512	3.3032	0.4197	1.1196	533.19	0.4506	1	SB	NB	H-2Db	0.34	8	Major	0.83518	SWATH
VIYIFTVRL	64.0973	VIYIFTVRL	VIYIFTVRL	0.022	4.0631	0.0902	8.8478	18838.6	VIYIFTVRL	VIYIFTVRL	0.9761	0.0037	0.8611	0.0088	4.5	0.4991	1	NB	SB	H-2Kb	0.85	8	Major	0.605114	SWATH
SQIVDDDFI	43.6859	SQIVDDDFI	SQIVDDDFI	0.6628	0.0474	0.6189	0.0304	61.74	SQIVDDDFI	SQIVDDDFI	0.0011	28.9457	0.0856	33.0825	19793.5	0.3319	1	SB	NB	H-2Db	1.36622	8	Major	0.471312	SWATH
VTKYYINL	44.7649	VT-KYYINL	VTKYYINL	0.0007	30.1923	0.0253	48.3971	38012.5	VT-KYYINL	VTKYYINL	0.9069	0.0175	0.7832	0.0253	10.44	0.4538	1	NB	SB	H-2Kb	3.5642	8	Major	0.246312	SWATH
SAPMNVDNLIM	50.0161	SAPMNVDIM	SAPMNVDNLIM	0.9487	0.0052	0.7728	0.008	11.69	SAPMNVDNM	SAPMNVDNLIM	0.0068	11.8179	0.1521	13.8633	9641.27	0.4777	1	SB	NB	H-2Db	3.95296	8	Major	0.240063	SWATH
YSPSNHHILL	46.4325	YSPSNHHIL	YSPSNHHILL	0.8935	0.0109	0.6385	0.0259	49.95	YSPSHHILL	YSPSNHHILL	0.0906	2.0948	0.3479	2.0714	1159.02	0.492	1	SB	NB	H-2Db	1.25786	8	Major	0.217562	SWATH
LSYIYNML	51.2732	LSY-IYNML	LSYIYNML	0.0043	12.0646	0.0803	10.8685	20982.6	LSYI-YNML	LSYIYNML	0.9568	0.0067	0.8792	0.0076	3.7	0.4806	1	NB	SB	H-2Kb	0.5	8	Major	0.200063	SWATH
SAPMNVDNLIMIV	45.8393	SAPMNVDIV	SAPMNVDNLIMIV	0.3761	0.1964	0.6287	0.0281	55.5	SAPMNVDNV	SAPMNVDNLIMIV	0.001	30.1795	0.1148	21.9277	8 14434.8	0.1885	1	SB	NB	H-2Db	7.17845	8	Major	0.197563	SWATH
FKLILAEYI	44.9761	FKLILAEYI	FKLILAEYI	0.2459	0.3678	0.4254	0.1882	501.25	FKLILAEYI	FKLILAEYI	0.0064	12.2261	0.1481	14.5312	10065.4	0.1261	1	SB	NB	H-2Db	3.85296	8	Major	0.152563	SWATH
TGPVGQLWM	39.2427	TGPVGQLWM	TGPVGQLWM	0.3573	0.2175	0.3402	0.3946	1260.48	TGPVGQLWM	TGPVGQLWM	0.0183	6.6215	0.151	14.0464	9761.67	0.1878	1	SB	NB	H-2Db	144.182	8	Major	0.132563	SWATH
YAPVSPIVI	52.1065	YAPVSPIVI	YAPVSPIVI	0.866	0.0137	0.5804	0.0407	93.72	YAPVSPIVI	YAPVSPIVI	0.0572	3.0379	0.1745	10.7624	7569.15	0.4616	1	SB	NB	H-2Db	1.4	7	Major	0.528072	SWATH
AIVNYANL	49.6735	AIVNYANL	AIVNYANL	0.0842	1.2434	0.26	0.8816	3002.33	AIVN-YANL	AIVNYANL	0.8884	0.0231	0.7808	0.0261	10.71	0.4863	2	NB	SB	H-2Kb	0.767888	7	Major	0.460071	SWATH
SAPMNVDNLI	52.2019	SAPMNVDLI	SAPMNVDNLI	0.9345	0.0067	0.806	0.0068	8.16	SAPMNVNLI	SAPMNVDNLI	0.0045	14.6446	0.167	11.7089	8207.91	0.4695	1	SB	NB	H-2Db	3.27357	7	Major	0.209479	SWATH
LNYVDYNI	52.3857	LNYVD-YNI	LNYVDYNI	0.0012	23.7411	0.0529	20.7735	28200.9	LNYVDY-NI	LNYVDYNI	0.179	1.0708	0.504	0.523	214.06	0.0901	1	NB	NB	H-2Kb	40633	7	Major	0.187687	SWATH
NQMVNTVLI	50.1505	NQMVNTVLI	NQMVNTVLI	0.8764	0.0127	0.7302	0.0095	18.54	NQMVNTVLI	NQMVNTVLI	0.0095	9.7244	0.165	11.9623	8383.47	0.443	1	SB	NB	H-2Db	0.5	7	Major	0.184625	SWATH
MMINPFMI	53.2033	MMI-NPFMI	MMINPFMI	0.0777	1.3537	0.3064	0.5522	1816.44	MMINPF-MI	MMINPFMI	0.0445	3.65	0.3708	1.6779	905.3	0.0611	1	NB	NB	H-2Db	1096.5	7	Major	0.158719	SWATH
SAPMNVDNLIMI	47.6529	SAPMNVDNI	SAPMNVDNLIMI	0.6976	0.0412	0.7309	0.0094	18.39	SAPDNLIMI	SAPMNVDNLIMI	0.0027	18.9675	0.1437	15.3234	10559.8	0.3501	1	SB	NB	H-2Db	1.72883	6	Major	0.235708	SWATH
SAPMNVDNL	57.0005	SAPMNVDNL	SAPMNVDNL	0.9945	0.0006	0.8673	0.0047	4.2	SAPMNVDNL	SAPMNVDNL	0.2152	0.8714	0.3569	1.9127	1051.7	0.6049	2	SB	NB	H-2Db	2.6	6	Major	0.234503	SWATH
IMFSKSLNF	45.064	IMFSKSLNF	IMFSKSLNF	0.0609	1.7102	0.1814	2.1106	7026.39	IMFSKSLNF	IMFSKSLNF	0.6771	0.1026	0.7236	0.0603	19.89	0.369	2	NB	SB	H-2Kb	1.3231	6	Major	0.108143	SWATH
MALLFKNL	48.1988	MALLFK-NL	MALLFKNL	0.0099	7.1562	0.1012	7.1641	16735.8	MAL-LFKNL	MALLFKNL	0.8534	0.0347	0.8028	0.0163	8.44	0.4317	1	NB	SB	H-2Kb	0.905993	6	Major	0.0952857	SWATH
FLMMNKDEL	48.2734	FLMMNKDEL	FLMMNKDEL	0.8783	0.0125	0.7337	0.0093	17.83	FLMMNKDEL	FLMMNKDEL	0.0104	9.278	0.1869	9.4086	6621.31	0.4443	1	SB	NB	H-2Db	6.6	5	Major	0.390714	SWATH
LMYIFAAL	52.652	LMY-IFAAL	LMYIFAAL	0.0028	15.5044	0.1044	6.7533	16162.6	LMY-IFAAL	LMYIFAAL	0.8028	0.0506	0.839	0.0104	5.71	0.4028	1	NB	SB	H-2Kb	0.86	5	Major	0.376339	SWATH
TMMINPFMI	48.0788	TMMINPFMI	TMMINPFMI	0.7694	0.0251	0.7386	0.0092	16.92	TMMINPFMI	TMMINPFMI	0.0373	4.1403	0.3448	2.1336	1198.66	0.4034	1	SB	NB	H-2Db	7.9	5	Major	0.270953	SWATH
GSPTNLEFI	51.1687	GSPTNLEFI	GSPTNLEFI	0.9575	0.0043	0.7664	0.0082	12.53	GSPTNLEFI	GSPTNLEFI	0.0113	8.845	0.1412	15.8028	10850.7	0.4844	1	SB	NB	H-2Db	0.5	5	Major	0.216067	SWATH
VSLDYINTM	52.6811	VSLDYINTM	VSLDYINTM	0.2526	0.3557	0.2417	1.0719	3658.86	VSLDYINTM	VSLDYINTM	0.8414	0.0375	0.701	0.0768	25.41	0.547	2	SB	SB	H-2Kb	0.94	5	Major	0.198674	SWATH
TIVDFLSRL	53.3784	TIVDFLSRL	TIVDFLSRL	0.0123	6.1955	0.0718	13.0697	23004.6	TIVDFLSRL	TIVDFLSRL	0.9208	0.014	0.7595	0.035	13.49	0.4666	1	NB	SB	H-2Kb	0.5	5	Major	0.106597	SWATH
VMVTITQNV	49.5149	VMVTITQNV	VMVTITQNV	0.0516	1.9987	0.1718	2.387	7789.39	VMVTITQNV	VMVTITQNV	0.3158	0.5342	0.4894	0.5991	250.67	0.1837	2	NB	NB	H-2Kb	0.5	5	Major	0.1017	SWATH
SQYEYTTV	48.0412	SQYE-YTTV	SQYEYTTV	0.0376	2.6581	0.1262	4.6623	12766.9	SQYE-YTTV	SQYEYTTV	0.8955	0.0204	0.7382	0.0501	16.99	0.4665	1	NB	SB	H-2Kb	0.5	5	Major	0.101125	SWATH
YGVSNFKIGM	50.8161	YGVSNFIGM	YGVSNFKIGM	0.3486	0.2277	0.4889	0.0997	252.14	YGVSFKIGM	YGVSNFKIGM	0.0163	7.0951	0.2797	3.7926	2423.6	0.1824	1	SB	NB	H-2Db	3.80216	5	Major	0.0949306	SWATH
LFKNLATSI	40.6872	LFKNLATSI	LFKNLATSI	0.0032	14.1459	0.0529	20.8117	28223.2	LFKNLATSI	LFKNLATSI	0.0139	7.8513	0.1742	10.7982	7594.08	0.0086	0	NB	NB	H-2Kb	1189.51	4	Minor	0.0947667	SWATH
APGSPTNLEFI	39.7841	ASPTNLEFI	APGSPTNLEFI	0.8259	0.018	0.6508	0.0217	43.75	ASPTNLEFI	APGSPTNLEFI	0.002	21.8719	0.0979	27.6623	17331.4	0.414	1	SB	NB	H-2Db	14.0395	4	Minor	0.0946458	SWATH
SAPFDSVFYL	50.9607	SAPFDSVYL	SAPFDSVFYL	0.6309	0.055	0.5367	0.0624	150.25	SAFDSVFYL	SAPFDSVFYL	0.0916	2.0718	0.3906	1.4224	730.52	0.3613	1	SB	NB	H-2Db	0.5	4	Minor	0.0859167	SWATH
NAVSNKYEL	48.7408	NAVSNKYEL	NAVSNKYEL	0.9034	0.0099	0.6479	0.0229	45.11	NAVSNKYEL	NAVSNKYEL	0.0353	4.3024	0.1797	10.1522	7157.05	0.4693	1	SB	NB	H-2Db	0.79061	4	Minor	0.0657083	SWATH
MITMSAFL	42.9525	#NAME?	MITMSAFL	0.0025	16.2473	0.1224	4.9514	13292	MITM-SAFL	MITMSAFL	0.0244	5.5056	0.3557	1.9329	1066.01	0.0135	0	NB	NB	H-2Kb	186.261	3	Minor	0.156111	SWATH
VNIDQTTPM	44.6701	VNIDQTTPM	VNIDQTTPM	0.1374	0.7489	0.2095	1.4927	5181.22	VNIDQTTPM	VNIDQTTPM	0.3581	0.4431	0.5004	0.5418	222.57	0.2477	2	NB	SB	H-2Kb	41.005	3	Minor	0.0961111	SWATH
IMIEISNV	47.1426	IMIEI-SNV	IMIEISNV	0.0045	11.7047	0.0717	13.0965	23025.5	IMIE-ISNV	IMIEISNV	0.5086	0.2272	0.5824	0.2622	91.66	0.2566	1	NB	SB	H-2Kb	12.1212	3	Minor	0.0855	SWATH
IAIVNYANL	50.1394	IAIVNYANL	IAIVNYANL	0.9451	0.0056	0.7856	0.0075	10.17	IAIVNYANL	IAIVNYANL	0.815	0.0459	0.7936	0.0188	9.33	0.8801	2	SB	SB	H-2Db	0.5	3	Minor	0.07325	SWATH
SMYVIPDEL	50.5782	SMYVIPDEL	SMYVIPDEL	0.7474	0.0301	0.5467	0.0567	134.9	SMYVIPDEL	SMYVIPDEL	0.4315	0.3187	0.5129	0.4842	194.53	0.5894	2	SB	SB	H-2Db	6.32668	3	Minor	0.0670278	SWATH
IIAVFDSKL	39.7579	IIAVFDSKL	IIAVFDSKL	0.0102	7.0025	0.0699	13.6647	23474.3	IIAVFDSKL	IIAVFDSKL	0.492	0.242	0.5749	0.28	99.42	0.2511	1	NB	SB	H-2Kb	6.80662	3	Minor	0.0651111	SWATH
FMRTDMLQNM	53.5174	FMRTDLQNM	FMRTDMLQNM	0.0227	3.9552	0.1936	1.8097	6154.84	FMRDMLQNM	FMRTDMLQNM	0.0054	13.2896	0.2156	6.9693	4852.4	0.0141	0	NB	NB	H-2Db	1.50498	3	Minor	0.0625833	SWATH
SQGTNPHMI	42.9599	SQGTNPHMI	SQGTNPHMI	0.8019	0.0208	0.5229	0.069	174.6	SQGTNPHMI	SQGTNPHMI	0.0096	9.6641	0.0909	30.593	18694.6	0.4058	1	SB	NB	H-2Db	62.9835	3	Minor	0.0573333	SWATH
VTIRNVTHI	50.69	VTIRNVTHI	VTIRNVTHI	0.9572	0.0044	0.757	0.0085	13.87	VTIRNVTHI	VTIRNVTHI	0.2926	0.5945	0.4326	1.0003	463.86	0.6249	2	SB	NB	H-2Db	0.5	3	Minor	0.0536944	SWATH
SQYYFSML	49.4368	SQY-YFSML	SQYYFSML	0.0201	4.3583	0.128	4.5207	12517.3	SQY-YFSML	SQYYFSML	0.9655	0.0053	0.8747	0.0079	3.88	0.4928	1	NB	SB	H-2Kb	0.5	3	Minor	0.0459167	SWATH
KCIEYVTL	47.9077	KCIE-YVTL	KCIEYVTL	0.0074	8.6852	0.0498	22.5691	29162.8	KCIE-YVTL	KCIEYVTL	0.5235	0.2141	0.4616	0.7792	338.74	0.2654	1	NB	SB	H-2Kb	808.167	2	Minor	0.0754167	SWATH
EQFTFSNV	46.4397	EQF-TFSNV	EQFTFSNV	0.0026	16.1111	0.0462	24.8657	30331	EQFT-FSNV	EQFTFSNV	0.4939	0.2403	0.5581	0.328	119.25	0.2482	1	NB	SB	H-2Kb	1.76453	2	Minor	0.071	SWATH
YIDHIVNI	44.7165	Y-IDHIVNI	YIDHIVNI	0.0043	12.0152	0.05	22.4736	29112.1	YI-DHIVNI	YIDHIVNI	0.046	3.5538	0.1914	8.9605	6300.24	0.0251	0	NB	NB	H-2Kb	17794.1	2	Minor	0.0706111	SWATH
VNKYFENPL	44.9765	VNKYFENPL	VNKYFENPL	0.0102	7.0201	0.0713	13.215	23118.3	VNKYFENPL	VNKYFENPL	0.4793	0.2546	0.6349	0.1568	51.93	0.2447	1	NB	SB	H-2Kb	27.2573	2	Minor	0.06875	SWATH
ITQYLDFL	48.905	ITQ-YLDFL	ITQYLDFL	0.0023	16.853	0.0542	20.1009	27811.2	ITQ-YLDFL	ITQYLDFL	0.0843	2.2301	0.3312	2.405	1388.25	0.0433	0	NB	NB	H-2Kb	1189.95	2	Minor	0.06725	SWATH
KQYIVATL	44.3387	KQYI-VATL	KQYIVATL	0.0473	2.1834	0.114	5.7147	14559	KQYI-VATL	KQYIVATL	0.734	0.0785	0.6149	0.1905	64.53	0.3907	1	NB	SB	H-2Kb	0.5	2	Minor	0.06375	SWATH
KTVTNLISETL	49.386	KTVTNSETL	KTVTNLISETL	0.734	0.0331	0.5321	0.0646	158.02	KTVTNLITL	KTVTNLISETL	0.0124	8.3766	0.1705	11.2593	7905.38	0.3732	1	SB	NB	H-2Db	2.13474	2	Minor	0.05875	SWATH
DVTTFLSM	48.9884	DVTTFLSM	DVTTFLSM	0.0002	46.4615	0.0211	56.7362	39803.4	DVTT-FLSM	DVTTFLSM	0.0707	2.5452	0.2122	7.2112	5033.79	0.0354	0	NB	NB	H-2Kb	2600.16	2	Minor	0.0461111	SWATH
TNVVNISTI	45.0038	TNVVNISTI	TNVVNISTI	0.8297	0.0176	0.6584	0.0193	40.3	TNVVNISTI	TNVVNISTI	0.0874	2.1642	0.2933	3.3542	2092.15	0.4586	1	SB	NB	H-2Db	9.97566	2	Minor	0.038875	SWATH
RSTINGEQI	48.0343	RSTINGEQI	RSTINGEQI	0.8141	0.0193	0.5947	0.0367	80.26	RSTINGEQI	RSTINGEQI	0.0062	12.4566	0.1157	21.6745	14291.5	0.4101	1	SB	NB	H-2Db	59.0385	2	Minor	0.035125	SWATH
KSLVNLEIL	47.6909	KSLVNLEIL	KSLVNLEIL	0.9788	0.0022	0.8091	0.0067	7.89	KSLVNLEIL	KSLVNLEIL	0.0711	2.5284	0.2951	3.303	2052.91	0.525	1	SB	NB	H-2Db	9.01477	1	Minor	0.155667	SWATH
SFIEVISL	46.1125	SFIE-VISL	SFIEVISL	0.0052	10.7821	0.0512	21.7477	28727.5	SFIE-VISL	SFIEVISL	0.5403	0.199	0.4999	0.5446	223.89	0.2728	1	NB	SB	H-2Kb	0.5	1	Minor	0.135667	SWATH
VGINLVEKI	41.2687	VGINLVEKI	VGINLVEKI	0.2357	0.3862	0.2714	0.7848	2652.21	VGINLVEKI	VGINLVEKI	0.1173	1.6397	0.2485	5.0764	3398.74	0.1765	2	SB	NB	H-2Db	510.1	1	Minor	0.0745	SWATH
VGPNNTRSI	44.4642	VGPNNTRSI	VGPNNTRSI	0.7676	0.0255	0.5164	0.0737	187.27	VGPNNTRSI	VGPNNTRSI	0.1609	1.1898	0.2686	4.1964	2734.24	0.4642	2	SB	NB	H-2Db	29.1093	1	Minor	0.0575	SWATH
YAIDVTKVNPL	44.0514	YAITKVNPL	YAIDVTKVNPL	0.3586	0.2159	0.4467	0.1504	398.13	YAIDKVNPL	YAIDVTKVNPL	0.0182	6.6491	0.212	7.2247	5044.05	0.1884	1	SB	NB	H-2Db	72.8422	1	Minor	0.0575	SWATH
FTLINEEML	44.3235	FTLINEEML	FTLINEEML	0.8911	0.0111	0.684	0.0143	30.55	FTLINEEML	FTLINEEML	0.0344	4.3718	0.2295	6.0837	4176.07	0.4627	1	SB	NB	H-2Db	7.49543	1	Minor	0.0475	SWATH
KTVKNVDII	47.7742	KTVKNVDII	KTVKNVDII	0.8758	0.0127	0.6892	0.0136	28.88	KTVKNVDII	KTVKNVDII	0.0069	11.6585	0.1267	18.816	12699.2	0.4414	1	SB	NB	H-2Db	2.48096	1	Minor	0.04	SWATH
SAVINNMQI	51.8395	SAVINNMQI	SAVINNMQI	0.9625	0.0038	0.7796	0.0077	10.86	SAVINNMQI	SAVINNMQI	0.0387	4.0242	0.2298	6.0651	4162	0.5006	1	SB	NB	H-2Db	0.5	1	Minor	0.04	SWATH
TSSINLSYI	45.0245	TSSINLSYI	TSSINLSYI	0.8902	0.0112	0.736	0.0093	17.39	TSSINLSYI	TSSINLSYI	0.0272	5.1272	0.269	4.1806	2722.25	0.4587	1	SB	NB	H-2Db	0.863614	1	Minor	0.03025	SWATH
LQNVMISIL	45.0048	LQNVMISIL	LQNVMISIL	0.0952	1.0981	0.2281	1.2229	4236.46	LQNVMISIL	LQNVMISIL	0.023	5.7379	0.2219	6.5358	4530.26	0.0591	1	NB	NB	H-2Db	268.757	0	Non	0	SWATH
GTVVNKEAI	52.9558	GTVVNKEAI	GTVVNKEAI	0.775	0.0243	0.5858	0.0391	88.41	GTVVNKEAI	GTVVNKEAI	0.002	21.8374	0.0849	33.4652	19954.1	0.3885	1	SB	NB	H-2Db	4.98822	0	Non	0	SWATH
KVIGFVSI	42.7695	KVI-GFVSI	KVIGFVSI	0.0061	9.765	0.0612	16.8007	25787.4	KVIG-FVSI	KVIGFVSI	0.7077	0.0919	0.5921	0.2395	82.55	0.3569	1	NB	SB	H-2Kb	18.4716	0	Non	0	SWATH
KAIDFSQM	44.7462	KAI-DFSQM	KAIDFSQM	0.0511	2.0175	0.1124	5.873	14817.1	KAID-FSQM	KAIDFSQM	0.8267	0.0414	0.6527	0.127	42.86	0.4389	1	NB	SB	H-2Kb	11.3781	0	Non	0	SWATH
ASLKNFKEL	44.9919	ASLKNFKEL	ASLKNFKEL	0.9435	0.0058	0.6678	0.0173	36.38	ASLKNFKEL	ASLKNFKEL	0.5319	0.2066	0.52	0.4588	180.08	0.7377	2	SB	SB	H-2Db	6.72473	0	Non	0	SWATH
SSFTKMAEI	49.289	SSFTKMAEI	SSFTKMAEI	0.4464	0.1365	0.4134	0.2067	570.95	SSFTKMAEI	SSFTKMAEI	0.6869	0.0987	0.6832	0.0898	30.8	0.5667	2	SB	SB	H-2Kb	10.637	0	Non	0	SWATH
ISIKLTDSL	41.2557	ISIKLTDSL	ISIKLTDSL	0.6713	0.0459	0.4608	0.1287	341.79	ISIKLTDSL	ISIKLTDSL	0.3196	0.5242	0.4309	1.0151	472.13	0.4954	2	SB	NB	H-2Db	106.008	0	Non	0	SWATH
SMLSNLTNL	51.1309	SMLSNLTNL	SMLSNLTNL	0.9581	0.0043	0.7927	0.0073	9.42	SMLSNLTNL	SMLSNLTNL	0.4489	0.293	0.5976	0.2265	77.75	0.7035	2	SB	SB	H-2Db	0.624383	0	Non	0	SWATH
ALYYVHSL	40.4539	ALY-YVHSL	ALYYVHSL	0.0042	12.2186	0.0564	18.924	27148.5	ALY-YVHSL	ALYYVHSL	0.6926	0.0969	0.5841	0.2583	90	0.3484	1	NB	SB	H-2Kb	0.936879	0	Non	0	SWATH
VIYDFLVKT	43.5241	VIYDFLVKT	VIYDFLVKT	0.0013	22.4375	0.033	37.1942	34978.1	VIYDFLVKT	VIYDFLVKT	0.6972	0.0954	0.642	0.1449	48.13	0.3493	1	NB	SB	H-2Kb	2.31043	0	Non	0	SWATH
IAPRSGLSL	40.8277	IAPRSGLSL	IAPRSGLSL	0.6165	0.0591	0.3862	0.2586	765.59	IAPRSGLSL	IAPRSGLSL	0.3211	0.5203	0.3895	1.4346	738.92	0.4688	2	SB	NB	H-2Db	150.33	0	Non	0	SWATH
AAIRGNDVI	46.673	AAIRGNDVI	AAIRGNDVI	0.7549	0.0284	0.5798	0.0409	94.25	AAIRGNDVI	AAIRGNDVI	0.002	21.7044	0.0878	32.0653	19341.1	0.3785	1	SB	NB	H-2Db	10.7505	0	Non	0	SWATH
TQNVNAAHL	50.7845	TQNVNAAHL	TQNVNAAHL	0.8647	0.0139	0.616	0.0311	63.73	TQNVNAAHL	TQNVNAAHL	0.0556	3.1077	0.2557	4.7366	3144.6	0.4602	1	SB	NB	H-2Db	7.92805	0	Non	0	SWATH
ECKTHASSI	44.3776	ECKTHASSI	ECKTHASSI	0.0009	27.338	0.027	45.6346	37344.3	ECKTHASSI	ECKTHASSI	0.0038	15.9045	0.0753	38.8247	22128.6	0.0023	0	NB	NB	H-2Kb	295.516	0	Non	0	SWATH
QIETGTPFIL	41.1722	QIETGTPFL	QIETGTPFIL	0.0008	27.6901	0.0282	43.7384	36863.8	QETGTPFIL	QIETGTPFIL	0.0007	35.2391	0.0589	50.9384	26429.4	0.0008	0	NB	NB	H-2Db	12878.3	0	Non	0	SWATH
MSMKYLML	42.8486	MSM-KYLML	MSMKYLML	0.009	7.6327	0.1113	5.9834	15000	MSM-KYLML	MSMKYLML	0.8411	0.0375	0.8225	0.0128	6.82	0.4251	1	NB	SB	H-2Kb	0.798091	2	Minor	0.0854167	SWATH
ISISDAENM	43.781	ISISDAENM	ISISDAENM	0.4613	0.1261	0.4077	0.2173	607.09	ISISDAENM	ISISDAENM	0.0781	2.3661	0.2899	3.4548	2171.47	0.2697	1	SB	NB	H-2Db	42.1984	0	Non	0	SWATH
GIGVQGLADAF	43.5361	GVQGLADAF	GIGVQGLADAF	0.0007	30.3269	0.0457	25.1855	30480.4	GVQGLADAF	GIGVQGLADAF	0.0004	43.75	0.0668	44.683	24279.2	0.0005	0	NB	NB	H-2Db	110.021	0	Non	0	SWATH
YSQVNKRYI	57.6227	YSQVNKRYI	YSQVNKRYI	0.8424	0.0162	0.6754	0.0158	33.5	YSQVNKRYI	YSQVNKRYI	0.018	6.6897	0.1915	8.9564	6297.17	0.4302	1	SB	NB	H-2Db	32	8	Major	1.16714	MRM
NNIFRTNL	51.1485	NNI-FRTNL	NNIFRTNL	0.0031	14.4244	0.0404	29.3837	32280.4	NNI-FRTNL	NNIFRTNL	0.4449	0.298	0.4802	0.6523	277.16	0.224	1	NB	SB	H-2Kb	161.887	8	Major	0.210063	MRM
PNTSIKEIK	45.4845	PNTSIKEIK	PNTSIKEIK	0	75	0.0073	93.1667	46215.2	PNTSIKEIK	PNTSIKEIK	0.0001	68.3333	0.0228	90.7547	39077.6	0.0001	0	NB	NB	H-2Kb	68.0867	3	Minor	0.0525833	MRM
NTPNNTTTI	51.3402	NTPNNTTTI	NTPNNTTTI	0.8151	0.0192	0.5288	0.0662	163.78	NTPNNTTTI	NTPNNTTTI	0.0219	5.9082	0.1268	18.788	12682.5	0.4185	1	SB	NB	H-2Db	73.927	2	Minor	0.070125	MRM
AQDYDQYI	55.9852	AQD-YDQYI	AQDYDQYI	0.0074	8.6957	0.056	19.1421	27276.9	AQ-DYDQYI	AQDYDQYI	0.0024	20.141	0.0677	43.952	24025.2	0.0049	0	NB	NB	H-2Db	8268.34	2	Minor	0.06725	MRM
LRYLLFGI	48.7123	LRYLLF-GI	LRYLLFGI	0.0001	52.6667	0.0295	41.7472	36336.7	LRYLLF-GI	LRYLLFGI	0.03	4.7964	0.3125	2.8316	1699.79	0.0151	0	NB	NB	H-2Kb	297.293	2	Minor	0.0554167	MRM
SMSQELAEL	48.4871	SMSQELAEL	SMSQELAEL	0.1394	0.7359	0.2201	1.3314	4621.95	SMSQELAEL	SMSQELAEL	0.0849	2.2174	0.3034	3.0598	1876.34	0.1122	1	NB	NB	H-2Db	302.145	1	Minor	0.125667	MRM
NLSLGKSPLPSL	50.7082	NGKSPLPSL	NLSLGKSPLPSL	0.0007	30.0385	0.0377	32.0523	33259.6	NGKSPLPSL	NLSLGKSPLPSL	0.0005	39.8438	0.1171	21.3162	14091.3	0.0006	0	NB	NB	H-2Db	2387.33	1	Minor	0.08	MRM
NMFAANRDNVA	41.4603	NMFANRDNV	NMFAANRDNV	0.0018	19.5978	0.1324	4.2158	11938.2	NMFNRDNVA	NMFAANRDNVA	0.0001	64.4872	0.0725	40.5888	22811.7	0.0009	0	NB	NB	H-2Db	78.9546	1	Minor	0.0675	MRM
KSIEIAKEL	46.4615	KSIEIAKEL	KSIEIAKEL	0.2209	0.4209	0.1897	1.8999	6422.54	KSIEIAKEL	KSIEIAKEL	0.2919	0.5964	0.3185	2.6908	1594.14	0.2564	2	SB	NB	H-2Db	3614.1	1	Minor	0.06	MRM
SNLKHIGNHI	55.246	SNLKHINHI	SNLKHIGNHI	0.0426	2.3916	0.1495	3.2603	9920.64	SNLKHINHI	SNLKHIGNHI	0.0232	5.6908	0.2588	4.594	3041.17	0.0329	0	NB	NB	H-2Db	700.243	1	Minor	0.0475	MRM
SGGGNLTEI	41.9801	SGGGNLTEI	SGGGNLTEI	0.7142	0.0377	0.5161	0.074	187.82	SGGGNLTEI	SGGGNLTEI	0.0064	12.1361	0.1044	25.2805	16166.4	0.3603	1	SB	NB	H-2Db	61.9037	0	Non	0	MRM
