# Supplementary material for: Mass spectrometry-based thermostability profiling of virus-derived MHC peptide complexes serves as an effective predictor of immunogenicity
Source: Research Square preprint supplement (doi:10.21203/rs.3.rs-5824434/v1), 2025-02-03
Supplement: Supplementary file 8 [file ec64e247570b7a30d345f417.xlsx]

## Sheet: Sheet1
File.Name	Run	Reps	Protein.Group	Protein.Ids	Protein.Names	Genes	PG.Quantity	PG.Normalised	PG.MaxLFQ	Genes.Quantity	Genes.Normalised	Genes.MaxLFQ	Genes.MaxLFQ.Unique	Modified.Sequence	Stripped.Sequence	Precursor.Id	Precursor.Charge	Q.Value	PEP	Global.Q.Value	Protein.Q.Value	PG.Q.Value	Global.PG.Q.Value	GG.Q.Value	Translated.Q.Value	Proteotypic	Precursor.Quantity	Precursor.Normalised	Precursor.Translated	Ms1.Translated	Quantity.Quality	RT	RT.Start	RT.Stop	iRT	Predicted.RT	Predicted.iRT	First.Protein.Description	Lib.Q.Value	Lib.PG.Q.Value	Ms1.Profile.Corr	Ms1.Area	Evidence	Spectrum.Similarity	Mass.Evidence	CScore	Decoy.Evidence	Decoy.CScore	Fragment.Quant.Raw
Z:\MS_data\7600_ZenoTof\2022\202210\20221012_MS_DC24_VACV_zenoSWATH_thermostability\20221010_MS_zenoSWATH_DC24_VACV_37C_r1-MS_DC24_VACV_zenoSWATH_37C_r1.mzML	20221010_MS_zenoSWATH_DC24_VACV_37C_r1-MS_DC24_VACV_zenoSWATH_37C_r1	37C_r1	Q99MA9	Q99MA9	NKX61_MOUSE	Nkx6-1	741.238	277.503	277.503	741.238	277.503	277.503	277.503	AAAAASSPAGLL	AAAAASSPAGLL	AAAAASSPAGLL2	2	0.00101626	0.135334	0.159766	0.035124	0.0348599	1	0.0352941	0	1	741.238	277.503	541.747	1084.08	0.781323	27.1975	27.1438	27.2512	45.6169	27.2164	45.5277	Homeobox protein Nkx-6.1	0.0132118	0.0188335	0.282788	1483.28	1.37741	0.278899	0	0.957775	1.51018	0.238985	1547.76;0;0;20.3459;57.6798;0;0;185.616;82.2845;0;0;975.523;
Z:\MS_data\7600_ZenoTof\2022\202210\20221012_MS_DC24_VACV_zenoSWATH_thermostability\20221010_MS_zenoSWATH_DC24_VACV_41C_r1-MS_DC24_VACV_zenoSWATH_41C_r1.mzML	20221010_MS_zenoSWATH_DC24_VACV_41C_r1-MS_DC24_VACV_zenoSWATH_41C_r1	41C_r1	Q99MA9	Q99MA9	NKX61_MOUSE	Nkx6-1	623.783	266.741	0	623.783	266.741			AAAAASSPAGLL	AAAAASSPAGLL	AAAAASSPAGLL2	2	0.0161643	1	0.159766	0.0338505	0.0335899	1	0.0340667	0	1	623.783	266.741	485.595	1464.93	0.501654	27.1706	27.1169	27.2242	45.6169	27.1615	45.5408	Homeobox protein Nkx-6.1	0.0132118	0.0188335	0.517578	1881.81	0.817673	0.11284	0	0.672701	1.21181	0.379704	1731.91;0;158.244;0;78.2018;0;0;351.025;566.295;0;0;514.334;
Z:\MS_data\7600_ZenoTof\2022\202210\20221012_MS_DC24_VACV_zenoSWATH_thermostability\20221010_MS_zenoSWATH_DC24_VACV_41C_r2-MS_DC24_VACV_zenoSWATH_41C_r2.mzML	20221010_MS_zenoSWATH_DC24_VACV_41C_r2-MS_DC24_VACV_zenoSWATH_41C_r2	41C_r2	Q99MA9	Q99MA9	NKX61_MOUSE	Nkx6-1	3083.67	1452.66	1452.66	3083.67	1452.66	1452.66	1452.66	AAAAASSPAGLL	AAAAASSPAGLL	AAAAASSPAGLL2	2	0.0010543	0.164425	0.159766	0.036119	0.0365425	1	0.0363507	0	1	3083.67	1452.66	2176.13	3028.14	0.892965	27.116	26.8476	27.3039	45.6169	27.1551	45.0505	Homeobox protein Nkx-6.1	0.0132118	0.0188335	0.931397	4291	2.0688	0.409491	0	0.955888	0.756758	0.328687	3052.97;0;486.344;0;97.0575;557.062;0;1518.42;336.148;0;0;715.31;
Z:\MS_data\7600_ZenoTof\2022\202210\20221012_MS_DC24_VACV_zenoSWATH_thermostability\20221010_MS_zenoSWATH_DC24_VACV_45C_r2-MS_DC24_VACV_zenoSWATH_45C_r2.mzML	20221010_MS_zenoSWATH_DC24_VACV_45C_r2-MS_DC24_VACV_zenoSWATH_45C_r2	45C_r2	Q99MA9	Q99MA9	NKX61_MOUSE	Nkx6-1	458.769	303.345	303.345	458.769	303.345	303.345	303.345	AAAAASSPAGLL	AAAAASSPAGLL	AAAAASSPAGLL2	2	0.000761615	0.0616784	0.159766	0.0382775	0.0379447	1	0.0385233	0	1	458.769	303.345	379.372	1163.53	0.457998	27.0895	27.0358	27.1431	45.6169	27.1866	45.1396	Homeobox protein Nkx-6.1	0.0132118	0.0188335	0.577211	1407.04	1.22032	0.411412	0.947836	0.986676	0	-10000000	1394.57;0;130.437;69.4735;0;0;0;351.025;224.786;135.051;0;374.133;
Z:\MS_data\7600_ZenoTof\2022\202210\20221012_MS_DC24_VACV_zenoSWATH_thermostability\20221010_MS_zenoSWATH_DC24_VACV_49C_r1-MS_DC24_VACV_zenoSWATH_49C_r1.mzML	20221010_MS_zenoSWATH_DC24_VACV_49C_r1-MS_DC24_VACV_zenoSWATH_49C_r1	49C_r1	Q99MA9	Q99MA9	NKX61_MOUSE	Nkx6-1	80.7677	60.1963	0	80.7677	60.1963			AAAAASSPAGLL	AAAAASSPAGLL	AAAAASSPAGLL2	2	0.0322802	1	0.159766	0.0546956	0.0561224	1	0.0540541	0	1	80.7677	60.1963	63.366	34.3781	0.801784	26.6348	26.5811	26.6885	45.6169	27.1658	43.4529	Homeobox protein Nkx-6.1	0.0132118	0.0188335	0.539891	43.8191	1.36816	0.0325492	0	0.647579	1.16635	0.283327	80.7677;0;425.281;204.451;0;0;0;0;885.737;0;0;0;
Z:\MS_data\7600_ZenoTof\2022\202210\20221012_MS_DC24_VACV_zenoSWATH_thermostability\20221010_MS_zenoSWATH_DC24_VACV_37C_r1-MS_DC24_VACV_zenoSWATH_37C_r1.mzML	20221010_MS_zenoSWATH_DC24_VACV_37C_r1-MS_DC24_VACV_zenoSWATH_37C_r1	37C_r1	Q3TWN3	Q3TWN3	CNNM2_MOUSE	Cnnm2	755.249	282.748	282.748	755.249	282.748	282.748	282.748	AAAGRLLPLL	AAAGRLLPLL	AAAGRLLPLL2	2	0.000446509	0.000446509	0.00892857	0.00637523	0.00631199	0.0141549	0.00641613	0	1	755.249	282.748	551.987	333.851	0.850835	34.3909	34.3104	34.4715	73.4511	34.3824	73.5494	Metal transporter CNNM2	0.00129282	0.00519031	0.719672	456.787	2.51557	0.264035	2.10452	0.999855	0	-10000000	623.983;413.896;0;213.877;286.523;0;0;136.614;0;0;0;0;
Z:\MS_data\7600_ZenoTof\2022\202210\20221012_MS_DC24_VACV_zenoSWATH_thermostability\20221010_MS_zenoSWATH_DC24_VACV_37C_r3-MS_DC24_VACV_zenoSWATH_37C_r3.mzML	20221010_MS_zenoSWATH_DC24_VACV_37C_r3-MS_DC24_VACV_zenoSWATH_37C_r3	37C_r3	Q3TWN3	Q3TWN3	CNNM2_MOUSE	Cnnm2	911.725	416.399	416.399	911.725	416.399	416.399	416.399	AAAGRLLPLL	AAAGRLLPLL	AAAGRLLPLL2	2	0.000596659	0.00218822	0.00892857	0.00699301	0.006917	0.0141549	0.00603622	0	1	911.725	416.399	696.858	241.22	0.714003	34.3627	34.3091	34.4969	73.4511	34.4203	73.185	Metal transporter CNNM2	0.00129282	0.00519031	0.733205	315.597	2.07747	0.374876	1.71858	0.999369	0	-10000000	478.751;620.477;0;87.5075;165.761;0;0;60.7759;0;0;0;0;
Z:\MS_data\7600_ZenoTof\2022\202210\20221012_MS_DC24_VACV_zenoSWATH_thermostability\20221010_MS_zenoSWATH_DC24_VACV_45C_r2-MS_DC24_VACV_zenoSWATH_45C_r2.mzML	20221010_MS_zenoSWATH_DC24_VACV_45C_r2-MS_DC24_VACV_zenoSWATH_45C_r2	45C_r2	Q3TWN3	Q3TWN3	CNNM2_MOUSE	Cnnm2	264.318	174.771	174.771	264.318	174.771	174.771	174.771	AAAGRLLPLL	AAAGRLLPLL	AAAGRLLPLL2	2	0.00148038	0.0942787	0.00892857	0.00823529	0.00813008	0.0141549	0.00830368	0	1	264.318	174.771	218.574	132.66	0.823393	34.39	34.2826	34.4437	73.4511	34.3996	73.2979	Metal transporter CNNM2	0.00129282	0.00519031	0.498043	160.424	1.37141	0.127008	1.04642	0.979776	0	-10000000	47.0743;67.7746;0;0;188.736;0;0;124.742;0;0;0;0;
Z:\MS_data\7600_ZenoTof\2022\202210\20221012_MS_DC24_VACV_zenoSWATH_thermostability\20221010_MS_zenoSWATH_DC24_VACV_45C_r3-MS_DC24_VACV_zenoSWATH_45C_r3.mzML	20221010_MS_zenoSWATH_DC24_VACV_45C_r3-MS_DC24_VACV_zenoSWATH_45C_r3	45C_r3	Q3TWN3	Q3TWN3	CNNM2_MOUSE	Cnnm2	219.473	89.9505	89.9505	219.473	89.9505	89.9505	89.9505	AAAGRLLPLL	AAAGRLLPLL	AAAGRLLPLL2	2	0.000587889	0.0292844	0.00892857	0.00749465	0.00740741	0.0141549	0.0075431	0	1	219.473	89.9505	168.23	219.127	0.893257	34.3903	34.3366	34.4708	73.4511	34.4092	73.4865	Metal transporter CNNM2	0.00129282	0.00519031	0.33625	285.873	1.25574	0.209512	1.3985	0.990999	0	-10000000	199.064;68.8619;0;152.851;30.3802;0;0;84.5195;0;0;0;0;
Z:\MS_data\7600_ZenoTof\2022\202210\20221012_MS_DC24_VACV_zenoSWATH_thermostability\20221010_MS_zenoSWATH_DC24_VACV_37C_r1-MS_DC24_VACV_zenoSWATH_37C_r1.mzML	20221010_MS_zenoSWATH_DC24_VACV_37C_r1-MS_DC24_VACV_zenoSWATH_37C_r1	37C_r1	P26673	P26673	A47_VACCW	VACWR173	2764410	1034930	998025	2764410	1034930	998025	998025	AAFEFINSL	AAFEFINSL	AAFEFINSL2	2	0.000590319	0.00919292	0.00223214	0.00294985	0.00285714	0.00214592	0.00299401	0	1	326898	122383	238919	141904	0.989987	40.0547	39.8669	40.1889	96.3754	40.0596	96.3917	Protein A47	0.000750188	0.00096432	0.997311	194158	5.90159	0.602955	4.94514	0.997014	3.71353	0.797252	182449;129620;5521.55;107680;89597.8;68625.1;78094.9;54202;54200.9;59897.4;51708.2;47983.6;
Z:\MS_data\7600_ZenoTof\2022\202210\20221012_MS_DC24_VACV_zenoSWATH_thermostability\20221010_MS_zenoSWATH_DC24_VACV_37C_r2-MS_DC24_VACV_zenoSWATH_37C_r2.mzML	20221010_MS_zenoSWATH_DC24_VACV_37C_r2-MS_DC24_VACV_zenoSWATH_37C_r2	37C_r2	P26673	P26673	A47_VACCW	VACWR173	1991720	1043180	1717510	1991720	1043180	1717510	1717510	AAFEFINSL	AAFEFINSL	AAFEFINSL2	2	0.000575374	0.013722	0.00223214	0.00294985	0.00285714	0.00214592	0.00298507	0	1	234086	122605	170753	98817.2	0.987831	40.0266	39.8656	40.1876	96.3754	40.0575	96.2614	Protein A47	0.000750188	0.00096432	0.993048	135469	5.86892	0.644754	4.97044	0.996246	3.46038	0.754074	116633;95391.6;11031.5;77409.4;61284.8;47107.9;42369.5;38298.2;35859.7;45826.2;33783;36477.8;
Z:\MS_data\7600_ZenoTof\2022\202210\20221012_MS_DC24_VACV_zenoSWATH_thermostability\20221010_MS_zenoSWATH_DC24_VACV_37C_r3-MS_DC24_VACV_zenoSWATH_37C_r3.mzML	20221010_MS_zenoSWATH_DC24_VACV_37C_r3-MS_DC24_VACV_zenoSWATH_37C_r3	37C_r3	P26673	P26673	A47_VACCW	VACWR173	2434370	1111810	997579	2434370	1111810	997579	997579	AAFEFINSL	AAFEFINSL	AAFEFINSL2	2	0.000397296	0.000397296	0.00223214	0.00310559	0.003003	0.00214592	0.00314465	0	1	326882	149292	249846	143720	0.994915	40.0801	39.8921	40.2143	96.3754	40.0809	96.3568	Protein A47	0.000750188	0.00096432	0.99557	188034	6.56626	0.773316	5.8081	0.999885	3.64134	0.581772	146464;133949;87475;107510;85423.3;66179.2;62429.3;51749.5;49926;64533.3;44855.9;48331.3;
Z:\MS_data\7600_ZenoTof\2022\202210\20221012_MS_DC24_VACV_zenoSWATH_thermostability\20221010_MS_zenoSWATH_DC24_VACV_41C_r1-MS_DC24_VACV_zenoSWATH_41C_r1.mzML	20221010_MS_zenoSWATH_DC24_VACV_41C_r1-MS_DC24_VACV_zenoSWATH_41C_r1	41C_r1	P26673	P26673	A47_VACCW	VACWR173	1832140	783459	1329680	1832140	783459	1329680	1329680	AAFEFINSL	AAFEFINSL	AAFEFINSL2	2	0.000600601	0.00429223	0.00223214	0.00303951	0.00294118	0.00214592	0.00307692	0	1	224509	96004.4	174773	106827	0.987217	40.0549	39.8669	40.1622	96.3754	40.0724	96.2986	Protein A47	0.000750188	0.00096432	0.996977	137227	6.34406	0.594478	5.71041	0.998546	3.30612	0.926794	111358;88058.3;51433.8;78064.8;58386;50581;45171.2;36290.9;36750.5;45419.3;33746.7;34469.6;
Z:\MS_data\7600_ZenoTof\2022\202210\20221012_MS_DC24_VACV_zenoSWATH_thermostability\20221010_MS_zenoSWATH_DC24_VACV_41C_r2-MS_DC24_VACV_zenoSWATH_41C_r2.mzML	20221010_MS_zenoSWATH_DC24_VACV_41C_r2-MS_DC24_VACV_zenoSWATH_41C_r2	41C_r2	P26673	P26673	A47_VACCW	VACWR173	2072890	976498	1464660	2072890	976498	1464660	1464660	AAFEFINSL	AAFEFINSL	AAFEFINSL2	2	0.0010543	0.145278	0.00223214	0.00290698	0.0028169	0.00214592	0.00294985	0	1	240279	113191	169564	91959.4	0.986865	40.0535	39.8656	40.1877	96.3754	40.0634	96.3282	Protein A47	0.000750188	0.00096432	0.996958	130310	6.85862	0.865084	5.9385	0.960824	3.38687	0.854575	111458;93956.5;77285;84143.8;62269.6;53364.1;48129.3;37129.3;35899.2;43920.9;36285.7;33424.8;
Z:\MS_data\7600_ZenoTof\2022\202210\20221012_MS_DC24_VACV_zenoSWATH_thermostability\20221010_MS_zenoSWATH_DC24_VACV_41C_r3-MS_DC24_VACV_zenoSWATH_41C_r3.mzML	20221010_MS_zenoSWATH_DC24_VACV_41C_r3-MS_DC24_VACV_zenoSWATH_41C_r3	41C_r3	P26673	P26673	A47_VACCW	VACWR173	2290330	1127990	1316000	2290330	1127990	1316000	1316000	AAFEFINSL	AAFEFINSL	AAFEFINSL2	2	0.000596303	0.00415328	0.00223214	0.00284091	0.00275482	0.00214592	0.00288184	0	1	221269	108975	169196	94938.3	0.985813	40.0522	39.8912	40.1865	96.3754	40.0786	96.2577	Protein A47	0.000750188	0.00096432	0.997035	124157	5.85238	0.602638	4.88694	0.998895	3.4447	0.886781	116890;86298.6;5318.69;73288;61682.7;46108.5;40578.3;33882.3;35043.8;41312.4;36420;31238;
Z:\MS_data\7600_ZenoTof\2022\202210\20221012_MS_DC24_VACV_zenoSWATH_thermostability\20221010_MS_zenoSWATH_DC24_VACV_45C_r1-MS_DC24_VACV_zenoSWATH_45C_r1.mzML	20221010_MS_zenoSWATH_DC24_VACV_45C_r1-MS_DC24_VACV_zenoSWATH_45C_r1	45C_r1	P26673	P26673	A47_VACCW	VACWR173	2654780	1036320	1197430	2654780	1036320	1197430	1197430	AAFEFINSL	AAFEFINSL	AAFEFINSL2	2	0.00590842	0.46946	0.00223214	0.00296736	0.00287356	0.00214592	0.00301205	0	1	409147	159716	315749	197069	0.989477	40.0531	39.892	40.1873	96.3754	40.0752	96.2882	Protein A47	0.000750188	0.00096432	0.992371	255362	5.92583	0.622219	4.97669	0.864592	3.84565	0.866215	235992;162285;4248.21;139314;107880;86952.9;99333;59047.4;63029.2;74772.5;59861;61312.6;
Z:\MS_data\7600_ZenoTof\2022\202210\20221012_MS_DC24_VACV_zenoSWATH_thermostability\20221010_MS_zenoSWATH_DC24_VACV_45C_r2-MS_DC24_VACV_zenoSWATH_45C_r2.mzML	20221010_MS_zenoSWATH_DC24_VACV_45C_r2-MS_DC24_VACV_zenoSWATH_45C_r2	45C_r2	P26673	P26673	A47_VACCW	VACWR173	1866850	1234390	1747400	1866850	1234390	1747400	1747400	AAFEFINSL	AAFEFINSL	AAFEFINSL2	2	9.20194e-05	9.20194e-05	0.00223214	0.00342466	0.00330033	0.00214592	0.00348432	0	1	225372	149020	186368	102865	0.993719	40.0539	39.866	40.215	96.3754	40.0846	96.2623	Protein A47	0.000750188	0.00096432	0.995077	124393	5.91887	0.65212	4.95294	0.99998	1.44096	0.830053	120498;88062.4;5221.61;76210.9;61098.6;45177.6;45164.3;33184;36306;41855.8;33071.9;28970.7;
Z:\MS_data\7600_ZenoTof\2022\202210\20221012_MS_DC24_VACV_zenoSWATH_thermostability\20221010_MS_zenoSWATH_DC24_VACV_45C_r3-MS_DC24_VACV_zenoSWATH_45C_r3.mzML	20221010_MS_zenoSWATH_DC24_VACV_45C_r3-MS_DC24_VACV_zenoSWATH_45C_r3	45C_r3	P26673	P26673	A47_VACCW	VACWR173	2803110	1148850	1376350	2803110	1148850	1376350	1376350	AAFEFINSL	AAFEFINSL	AAFEFINSL2	2	0.000587889	0.00579538	0.00223214	0.00304878	0.00294985	0.00214592	0.00308642	0	1	347537	142437	266393	155932	0.988497	40.0542	39.8663	40.1884	96.3754	40.0826	96.2768	Protein A47	0.000750188	0.00096432	0.997442	203430	5.87309	0.584065	4.97095	0.998206	2.21957	0.94068	204580;138646;9997.65;114199;94691;73667.6;75910.7;55358.7;52786.7;65429.7;48930.5;55523.9;
Z:\MS_data\7600_ZenoTof\2022\202210\20221012_MS_DC24_VACV_zenoSWATH_thermostability\20221010_MS_zenoSWATH_DC24_VACV_49C_r1-MS_DC24_VACV_zenoSWATH_49C_r1.mzML	20221010_MS_zenoSWATH_DC24_VACV_49C_r1-MS_DC24_VACV_zenoSWATH_49C_r1	49C_r1	P26673	P26673	A47_VACCW	VACWR173	855729	637776	1760730	855729	637776	1760730	1760730	AAFEFINSL	AAFEFINSL	AAFEFINSL2	2	0.000897666	0.00348751	0.00223214	0.00505051	0.00478469	0.00214592	0.00512821	0	1	294776	219697	231265	138248	0.995558	40.0561	39.8682	40.1903	96.3754	40.0687	96.3215	Protein A47	0.000750188	0.00096432	0.995084	176214	5.93718	0.673557	4.94674	0.99904	2.85277	0.702384	156647;114664;9868.68;101149;78962.9;62243.9;60221.6;47438.5;45374.1;56693.7;39974.1;42564.7;
Z:\MS_data\7600_ZenoTof\2022\202210\20221012_MS_DC24_VACV_zenoSWATH_thermostability\20221010_MS_zenoSWATH_DC24_VACV_49C_r2-MS_DC24_VACV_zenoSWATH_49C_r2.mzML	20221010_MS_zenoSWATH_DC24_VACV_49C_r2-MS_DC24_VACV_zenoSWATH_49C_r2	49C_r2	P26673	P26673	A47_VACCW	VACWR173	2091840	1250900	1085880	2091840	1250900	1085880	1085880	AAFEFINSL	AAFEFINSL	AAFEFINSL2	2	0.000125583	0.000125583	0.00223214	0.00395257	0.00378788	0.00214592	0.00401606	0	1	284236	169971	244035	138852	0.992116	40.0802	39.9192	40.2145	96.3754	40.0946	96.289	Protein A47	0.000750188	0.00096432	0.997511	161726	6.91914	0.800302	5.94911	0.999968	3.4797	0.849566	142040;110714;101507;97690.8;75831.7;61981.4;57019.1;43866.4;45183.3;53982.1;42816.8;42806.7;
Z:\MS_data\7600_ZenoTof\2022\202210\20221012_MS_DC24_VACV_zenoSWATH_thermostability\20221010_MS_zenoSWATH_DC24_VACV_49C_r3-MS_DC24_VACV_zenoSWATH_49C_r3.mzML	20221010_MS_zenoSWATH_DC24_VACV_49C_r3-MS_DC24_VACV_zenoSWATH_49C_r3	49C_r3	P26673	P26673	A47_VACCW	VACWR173	1276970	986130	1346820	1276970	986130	1346820	1346820	AAFEFINSL	AAFEFINSL	AAFEFINSL2	2	0.000940734	0.0276694	0.00223214	0.00446429	0.00425532	0.00214592	0.00454545	0	1	242475	187249	192078	107910	0.987905	40.0812	39.8933	40.2154	96.3754	40.0797	96.3503	Protein A47	0.000750188	0.00096432	0.998388	136223	6.86333	0.725804	5.89925	0.993756	3.36629	0.807268	113568;97339.7;63660.4;79946.9;65188.1;48828.6;47337;36847;39549.4;42213.8;36442.6;36140.4;
Z:\MS_data\7600_ZenoTof\2022\202210\20221012_MS_DC24_VACV_zenoSWATH_thermostability\20221010_MS_zenoSWATH_DC24_VACV_53C_r1-MS_DC24_VACV_zenoSWATH_53C_r1.mzML	20221010_MS_zenoSWATH_DC24_VACV_53C_r1-MS_DC24_VACV_zenoSWATH_53C_r1	53C_r1	P26673	P26673	A47_VACCW	VACWR173	2275570	1773890	631354	2275570	1773890	631354	631354	AAFEFINSL	AAFEFINSL	AAFEFINSL2	2	0.000898473	0.0213041	0.00223214	0.00581395	0.00546448	0.00214592	0.00595238	0	1	220710	172051	229045	125504	0.993315	40.0814	39.9204	40.2156	96.3754	40.098	96.3395	Protein A47	0.000750188	0.00096432	0.997084	120937	5.90922	0.628659	4.94358	0.994233	2.51714	0.79569	138936;86051.3;5076.27;78237.2;56421.9;46022.3;51050.5;34457.1;36141.2;39976.2;31334;31649.8;
Z:\MS_data\7600_ZenoTof\2022\202210\20221012_MS_DC24_VACV_zenoSWATH_thermostability\20221010_MS_zenoSWATH_DC24_VACV_53C_r2-MS_DC24_VACV_zenoSWATH_53C_r2.mzML	20221010_MS_zenoSWATH_DC24_VACV_53C_r2-MS_DC24_VACV_zenoSWATH_53C_r2	53C_r2	P26673	P26673	A47_VACCW	VACWR173	751625	603897	621465	751625	603897	621465	621465	AAFEFINSL	AAFEFINSL	AAFEFINSL2	2	0.00102775	0.00428048	0.00223214	0.0052356	0.00495049	0.00214592	0.00534759	0	1	174905	140528	133509	74889.3	0.98991	40.0533	39.8922	40.2143	96.3754	40.1525	95.9215	Protein A47	0.000750188	0.00096432	0.996492	98109.1	6.80077	0.728943	5.91273	0.998773	3.11612	0.945392	74216.6;66589.3;40405.6;58992.7;49322.6;35721.4;32329.2;25313.3;26673.6;35743.6;25239.2;27390.4;
Z:\MS_data\7600_ZenoTof\2022\202210\20221012_MS_DC24_VACV_zenoSWATH_thermostability\20221010_MS_zenoSWATH_DC24_VACV_53C_r3-MS_DC24_VACV_zenoSWATH_53C_r3.mzML	20221010_MS_zenoSWATH_DC24_VACV_53C_r3-MS_DC24_VACV_zenoSWATH_53C_r3	53C_r3	P26673	P26673	A47_VACCW	VACWR173	1114040	1657590	1009190	1114040	1657590	1009190	1009190	AAFEFINSL	AAFEFINSL	AAFEFINSL2	2	0.000871862	0.000871862	0.00223214	0.00854701	0.0078125	0.00214592	0.00877193	0	1	132268	196803	147674	85973	0.986181	40.0801	39.8922	40.2143	96.3754	40.137	96.1317	Protein A47	0.000750188	0.00096432	0.996033	77003.8	6.72431	0.812313	5.86042	0.999806	2.56725	0.731764	64800.1;53656.5;32088.6;43476.4;35135;27436.1;28745.1;21172.6;21700.8;26654.4;19954.6;18172.7;
Z:\MS_data\7600_ZenoTof\2022\202210\20221012_MS_DC24_VACV_zenoSWATH_thermostability\20221010_MS_zenoSWATH_DC24_VACV_57C_r1-MS_DC24_VACV_zenoSWATH_57C_r1.mzML	20221010_MS_zenoSWATH_DC24_VACV_57C_r1-MS_DC24_VACV_zenoSWATH_57C_r1	57C_r1	P26673	P26673	A47_VACCW	VACWR173	835242	1236200	705294	835242	1236200	705294	705294	AAFEFINSL	AAFEFINSL	AAFEFINSL2	2	0.00380228	0.143191	0.00223214	0.0128205	0.011236	0.00214592	0.0133333	0	1	17712.4	26215.3	15648	8799.37	0.9158	40.0268	39.8389	40.1878	96.3754	40.0499	96.2899	Protein A47	0.000750188	0.00096432	0.956414	9960.24	5.30263	0.763936	4.96029	0.920314	2.03876	0.696023	14416.5;6576.19;3414.6;6601.86;4738.37;4892.02;2452.33;2163.67;2758.64;2933.58;2333.23;2942.29;
Z:\MS_data\7600_ZenoTof\2022\202210\20221012_MS_DC24_VACV_zenoSWATH_thermostability\20221010_MS_zenoSWATH_DC24_VACV_57C_r2-MS_DC24_VACV_zenoSWATH_57C_r2.mzML	20221010_MS_zenoSWATH_DC24_VACV_57C_r2-MS_DC24_VACV_zenoSWATH_57C_r2	57C_r2	P26673	P26673	A47_VACCW	VACWR173	597713	1373420	568284	597713	1373420	568284	568284	AAFEFINSL	AAFEFINSL	AAFEFINSL2	2	0.0022518	0.0022518	0.00223214	0.0185185	0.0153846	0.00214592	0.0192308	0	1	4985.29	11455.2	5027.12	3720.94	0.834822	40.0542	39.8663	40.1884	96.3754	40.0784	96.1395	Protein A47	0.000750188	0.00096432	0.92531	3689.98	4.60143	0.745806	4.6622	0.998814	0	-10000000	5398.66;2140.07;747.27;2287.74;2048.68;2437.39;1534.92;727.981;853.303;1217.64;1007.26;1204;
Z:\MS_data\7600_ZenoTof\2022\202210\20221012_MS_DC24_VACV_zenoSWATH_thermostability\20221010_MS_zenoSWATH_DC24_VACV_57C_r3-MS_DC24_VACV_zenoSWATH_57C_r3.mzML	20221010_MS_zenoSWATH_DC24_VACV_57C_r3-MS_DC24_VACV_zenoSWATH_57C_r3	57C_r3	P26673	P26673	A47_VACCW	VACWR173	424970	778087	417444	424970	778087	417444	417444	AAFEFINSL	AAFEFINSL	AAFEFINSL2	2	0.002457	0.00331771	0.00223214	0.0291262	0.0277778	0.00214592	0.0295567	0	1	11299.4	20688.4	11985.6	5831.59	0.943963	40.0811	39.9201	40.1885	96.3754	40.0569	96.4355	Protein A47	0.000750188	0.00096432	0.971623	5497.72	5.34347	0.82157	4.77659	0.998027	1.80151	0.541182	8023.84;4674.32;2848.69;3604.43;3149.15;3275.06;2416.46;1449.76;1286.62;2450.08;1351.11;1741.33;
Z:\MS_data\7600_ZenoTof\2022\202210\20221012_MS_DC24_VACV_zenoSWATH_thermostability\20221010_MS_zenoSWATH_DC24_VACV_61C_r1-MS_DC24_VACV_zenoSWATH_61C_r1.mzML	20221010_MS_zenoSWATH_DC24_VACV_61C_r1-MS_DC24_VACV_zenoSWATH_61C_r1	61C_r1	P26673	P26673	A47_VACCW	VACWR173	215814	170363	54823.8	215814	170363	54823.8	54823.8	AAFEFINSL	AAFEFINSL	AAFEFINSL2	2	0.00361011	0.142933	0.00223214	0.0471698	0.0490196	0.00214592	0.0480769	0	1	1911.36	1508.82	1212.37	169.439	0.762106	40.053	39.8651	40.1871	96.3754	39.9894	96.7841	Protein A47	0.000750188	0.00096432	0.0573905	267.128	1.81021	0.474297	3.1562	0.890132	0.755817	0.455569	2312.4;1259.89;50.5738;877.734;456.468;420.32;126.922;194.224;435.498;197.162;213.514;264.788;
Z:\MS_data\7600_ZenoTof\2022\202210\20221012_MS_DC24_VACV_zenoSWATH_thermostability\20221010_MS_zenoSWATH_DC24_VACV_69C_r2-MS_DC24_VACV_zenoSWATH_69C_r2.mzML	20221010_MS_zenoSWATH_DC24_VACV_69C_r2-MS_DC24_VACV_zenoSWATH_69C_r2	69C_r2	P26673	P26673	A47_VACCW	VACWR173	7424.48	7251.51	6337.16	7424.48	7251.51	6337.16	6337.16	AAFEFINSL	AAFEFINSL	AAFEFINSL2	2	0.005	0.131198	0.00223214	0.0769231	0.06	0.00214592	0.0810811	0	1	561.708	548.622	358.143	244.797	0.765844	40.0529	39.9724	40.1334	96.3754	39.9717	96.6662	Protein A47	0.000750188	0.00096432	0.566241	383.938	2.88218	0.574935	2.14988	0.906963	0	-10000000	879.566;306.057;0;342.047;161.047;171.294;0;68.9569;255.293;61.4827;0;171.663;
Z:\MS_data\7600_ZenoTof\2022\202210\20221012_MS_DC24_VACV_zenoSWATH_thermostability\20221010_MS_zenoSWATH_DC24_VACV_57C_r1-MS_DC24_VACV_zenoSWATH_57C_r1.mzML	20221010_MS_zenoSWATH_DC24_VACV_57C_r1-MS_DC24_VACV_zenoSWATH_57C_r1	57C_r1	O08749	O08749	DLDH_MOUSE	Dld	269.843	399.383	399.383	269.843	399.383	399.383	399.383	AAFGKPINF	AAFGKPINF	AAFGKPINF2	2	0.00380228	0.0929898	0.160408	0.0689655	0.0715789	1	0.0672451	0	1	269.843	399.383	238.393	372.681	0.936161	25.8808	25.8003	25.9345	41.7324	26.1672	40.8617	Dihydrolipoyl dehydrogenase, mitochondrial	0.0135808	0.0188335	0.46165	421.848	1.36076	0.246958	0.690055	0.946764	0	-10000000	269.843;44.1047;85.89;124.626;0;0;19.1883;49.0227;211.721;0;13.8806;0;
Z:\MS_data\7600_ZenoTof\2022\202210\20221012_MS_DC24_VACV_zenoSWATH_thermostability\20221010_MS_zenoSWATH_DC24_VACV_57C_r2-MS_DC24_VACV_zenoSWATH_57C_r2.mzML	20221010_MS_zenoSWATH_DC24_VACV_57C_r2-MS_DC24_VACV_zenoSWATH_57C_r2	57C_r2	O08749	O08749	DLDH_MOUSE	Dld	450.077	1034.18	1034.18	450.077	1034.18	1034.18	1034.18	AAFGKPINF	AAFGKPINF	AAFGKPINF2	2	0.0056338	0.0493836	0.160408	0.0647887	0.0737705	1	0.0625	0	1	450.077	1034.18	453.854	492.667	0.825168	25.9618	25.8008	26.0155	41.7324	26.1789	40.903	Dihydrolipoyl dehydrogenase, mitochondrial	0.0135808	0.0188335	0.310544	488.567	1.40623	0.0506179	0.555758	0.97463	0	-10000000	450.077;229.231;124.93;323.989;0;0;0;124.633;51.1049;0;0;0;
Z:\MS_data\7600_ZenoTof\2022\202210\20221012_MS_DC24_VACV_zenoSWATH_thermostability\20221010_MS_zenoSWATH_DC24_VACV_61C_r1-MS_DC24_VACV_zenoSWATH_61C_r1.mzML	20221010_MS_zenoSWATH_DC24_VACV_61C_r1-MS_DC24_VACV_zenoSWATH_61C_r1	61C_r1	O08749	O08749	DLDH_MOUSE	Dld	3528.97	2785.76	2785.76	3528.97	2785.76	2785.76	2785.76	AAFGKPINF	AAFGKPINF	AAFGKPINF2	2	0.00361011	0.0572697	0.160408	0.0731707	0.0771812	1	0.0736842	0	1	3528.97	2785.76	2238.43	1279.73	0.906407	25.9072	25.7194	26.0683	41.7324	26.1324	40.9179	Dihydrolipoyl dehydrogenase, mitochondrial	0.0135808	0.0188335	0.643078	2017.55	2.36635	0.38114	1.55456	0.952876	0.916455	0.486157	1761.11;3211.22;569.349;1111.48;260.147;495.208;93.44;1108.41;227.052;0;92.254;239.499;
Z:\MS_data\7600_ZenoTof\2022\202210\20221012_MS_DC24_VACV_zenoSWATH_thermostability\20221010_MS_zenoSWATH_DC24_VACV_61C_r2-MS_DC24_VACV_zenoSWATH_61C_r2.mzML	20221010_MS_zenoSWATH_DC24_VACV_61C_r2-MS_DC24_VACV_zenoSWATH_61C_r2	61C_r2	O08749	O08749	DLDH_MOUSE	Dld	2481.86	2087.1	2087.1	2481.86	2087.1	2087.1	2087.1	AAFGKPINF	AAFGKPINF	AAFGKPINF2	2	0.00401606	0.0575378	0.160408	0.0781893	0.0748032	1	0.0788382	0	1	2481.86	2087.1	1579.38	1008.05	0.864397	25.9076	25.7734	26.0149	41.7324	26.1256	40.8236	Dihydrolipoyl dehydrogenase, mitochondrial	0.0135808	0.0188335	0.877271	1584.07	2.34521	0.349219	0.689141	0.953724	0.786023	0.479887	914.664;2005.78;43.8126;1150.45;213.382;334.924;21.3573;207.725;225.226;0;153.757;0;
Z:\MS_data\7600_ZenoTof\2022\202210\20221012_MS_DC24_VACV_zenoSWATH_thermostability\20221010_MS_zenoSWATH_DC24_VACV_61C_r3-MS_DC24_VACV_zenoSWATH_61C_r3.mzML	20221010_MS_zenoSWATH_DC24_VACV_61C_r3-MS_DC24_VACV_zenoSWATH_61C_r3	61C_r3	O08749	O08749	DLDH_MOUSE	Dld	2107.01	2256.68	2256.68	2107.01	2256.68	2256.68	2256.68	AAFGKPINF	AAFGKPINF	AAFGKPINF2	2	0.00460829	0.0170136	0.160408	0.0717703	0.0818182	1	0.0728155	0	1	2107.01	2256.68	1396.54	1095.3	0.84886	25.8806	25.7732	26.0148	41.7324	26.0727	40.9998	Dihydrolipoyl dehydrogenase, mitochondrial	0.0135808	0.0188335	0.649963	1652.51	2.59697	0.389915	2.15105	0.985887	0	-10000000	1303.65;2263.39;184.143;538.251;54.076;307.229;250.285;641.178;51.1048;0;61.5019;0;
Z:\MS_data\7600_ZenoTof\2022\202210\20221012_MS_DC24_VACV_zenoSWATH_thermostability\20221010_MS_zenoSWATH_DC24_VACV_37C_r1-MS_DC24_VACV_zenoSWATH_37C_r1.mzML	20221010_MS_zenoSWATH_DC24_VACV_37C_r1-MS_DC24_VACV_zenoSWATH_37C_r1	37C_r1	Q0GNC1	Q0GNC1	INF2_MOUSE	Inf2	14165.3	5303.18	5303.18	14165.3	5303.18	5303.18	5303.18	AAGINVEII	AAGINVEII	AAGINVEII2	2	0.000590319	0.00182492	0.00320256	0.00535332	0.00529101	0.0112867	0.00539374	0	1	14165.3	5303.18	10353	2560.39	0.844071	33.3153	33.2348	33.5301	68.2928	32.8427	68.9908	Inverted formin-2	0.000750188	0.00260417	0.922931	3503.22	3.77179	0.256165	2.68656	0.999406	0.600173	0.120985	9124.28;2165.88;665.921;95.1955;487.644;8155.95;513.199;0;335.265;513.344;98.1801;0;
Z:\MS_data\7600_ZenoTof\2022\202210\20221012_MS_DC24_VACV_zenoSWATH_thermostability\20221010_MS_zenoSWATH_DC24_VACV_37C_r2-MS_DC24_VACV_zenoSWATH_37C_r2.mzML	20221010_MS_zenoSWATH_DC24_VACV_37C_r2-MS_DC24_VACV_zenoSWATH_37C_r2	37C_r2	Q0GNC1	Q0GNC1	INF2_MOUSE	Inf2	7968.06	4173.36	4173.36	7968.06	4173.36	4173.36	4173.36	AAGINVEII	AAGINVEII	AAGINVEII2	2	0.000575374	0.00584127	0.00320256	0.00538793	0.00532481	0.0112867	0.00542299	0	1	7968.06	4173.36	5812.29	1683.9	0.760056	33.3677	33.2067	33.4751	68.2928	32.8103	69.1181	Inverted formin-2	0.000750188	0.00260417	0.948509	2308.46	3.31709	0.13201	3.96464	0.998399	0	-10000000	5088.25;2287.67;636.976;255.382;233.852;4795.37;238.851;0;173.007;227.204;127.769;500.437;
Z:\MS_data\7600_ZenoTof\2022\202210\20221012_MS_DC24_VACV_zenoSWATH_thermostability\20221010_MS_zenoSWATH_DC24_VACV_37C_r3-MS_DC24_VACV_zenoSWATH_37C_r3.mzML	20221010_MS_zenoSWATH_DC24_VACV_37C_r3-MS_DC24_VACV_zenoSWATH_37C_r3	37C_r3	Q0GNC1	Q0GNC1	INF2_MOUSE	Inf2	12782.4	5837.94	5837.94	12782.4	5837.94	5837.94	5837.94	AAGINVEII	AAGINVEII	AAGINVEII2	2	0.000596659	0.0102555	0.00320256	0.00554939	0.00548246	0.0112867	0.00447427	0	1	12782.4	5837.94	9769.98	1707.06	0.817635	33.3946	33.1799	33.5288	68.2928	32.8679	69.0516	Inverted formin-2	0.000750188	0.00260417	0.901918	2233.41	3.33775	0.148423	3.97211	0.99705	0	-10000000	6192.09;1318.9;490.583;84.5253;210.105;6567.7;192.89;0;36.2641;489.656;450.553;69.32;
Z:\MS_data\7600_ZenoTof\2022\202210\20221012_MS_DC24_VACV_zenoSWATH_thermostability\20221010_MS_zenoSWATH_DC24_VACV_41C_r1-MS_DC24_VACV_zenoSWATH_41C_r1.mzML	20221010_MS_zenoSWATH_DC24_VACV_41C_r1-MS_DC24_VACV_zenoSWATH_41C_r1	41C_r1	Q0GNC1	Q0GNC1	INF2_MOUSE	Inf2	11151.5	4768.61	4768.61	11151.5	4768.61	4768.61	4768.61	AAGINVEII	AAGINVEII	AAGINVEII2	2	0.000286229	0.000286229	0.00320256	0.00638978	0.00631579	0.0112867	0.00643777	0	1	11151.5	4768.61	8681.12	2898.02	0.84715	33.3153	33.2348	33.53	68.2928	32.8702	68.7974	Inverted formin-2	0.000750188	0.00260417	0.925611	3722.72	3.99496	0.247657	4.98533	0.999903	0.823384	0.117567	7111.68;1621.6;1426.8;158.243;715.952;6876.2;215.604;0;225.325;456.684;507.046;51.2777;
Z:\MS_data\7600_ZenoTof\2022\202210\20221012_MS_DC24_VACV_zenoSWATH_thermostability\20221010_MS_zenoSWATH_DC24_VACV_41C_r2-MS_DC24_VACV_zenoSWATH_41C_r2.mzML	20221010_MS_zenoSWATH_DC24_VACV_41C_r2-MS_DC24_VACV_zenoSWATH_41C_r2	41C_r2	Q0GNC1	Q0GNC1	INF2_MOUSE	Inf2	12188.9	5741.96	5741.96	12188.9	5741.96	5741.96	5741.96	AAGINVEII	AAGINVEII	AAGINVEII2	2	0.00066313	0.00184159	0.00320256	0.00618557	0.00612245	0.0112867	0.00623053	0	1	12188.9	5741.96	8601.66	1847.92	0.882382	33.3948	33.1801	33.5022	68.2928	32.8643	69.1553	Inverted formin-2	0.000750188	0.00260417	0.909905	2618.58	3.51856	0.361927	4.17322	0.999483	0	-10000000	6512.07;2227.23;493.828;56.5353;286.033;5136.97;343.367;0;296.707;646.365;218.839;324.287;
Z:\MS_data\7600_ZenoTof\2022\202210\20221012_MS_DC24_VACV_zenoSWATH_thermostability\20221010_MS_zenoSWATH_DC24_VACV_41C_r3-MS_DC24_VACV_zenoSWATH_41C_r3.mzML	20221010_MS_zenoSWATH_DC24_VACV_41C_r3-MS_DC24_VACV_zenoSWATH_41C_r3	41C_r3	Q0GNC1	Q0GNC1	INF2_MOUSE	Inf2	7250.72	3570.98	3570.98	7250.72	3570.98	3570.98	3570.98	AAGINVEII	AAGINVEII	AAGINVEII2	2	0.000596303	0.00148645	0.00320256	0.00448431	0.00442968	0.0112867	0.00451977	0	1	7250.72	3570.98	5544.35	1467.01	0.696674	33.3937	33.2327	33.5279	68.2928	32.8671	68.8479	Inverted formin-2	0.000750188	0.00260417	0.902362	1918.51	3.01355	0.3102	2.74162	0.999604	0	-10000000	4875.1;1127.88;428.627;141.893;194.156;6222.02;303.091;0;245.393;587.056;754.704;0;
Z:\MS_data\7600_ZenoTof\2022\202210\20221012_MS_DC24_VACV_zenoSWATH_thermostability\20221010_MS_zenoSWATH_DC24_VACV_45C_r1-MS_DC24_VACV_zenoSWATH_45C_r1.mzML	20221010_MS_zenoSWATH_DC24_VACV_45C_r1-MS_DC24_VACV_zenoSWATH_45C_r1	45C_r1	Q0GNC1	Q0GNC1	INF2_MOUSE	Inf2	6914.91	2699.32	2699.32	6914.91	2699.32	2699.32	2699.32	AAGINVEII	AAGINVEII	AAGINVEII2	2	0.00062461	0.00181296	0.00320256	0.00445434	0.00440044	0.0112867	0.00448934	0	1	6914.91	2699.32	5336.41	2423.12	0.727438	33.3676	33.2603	33.5019	68.2928	32.8233	68.9778	Inverted formin-2	0.000750188	0.00260417	0.861017	3139.88	3.56963	0.482369	4.64966	0.999396	0	-10000000	5829.27;1801.15;506.178;76.7656;393.686;4887.16;195.021;0;59.3416;1027.25;1061.16;207.959;
Z:\MS_data\7600_ZenoTof\2022\202210\20221012_MS_DC24_VACV_zenoSWATH_thermostability\20221010_MS_zenoSWATH_DC24_VACV_45C_r2-MS_DC24_VACV_zenoSWATH_45C_r2.mzML	20221010_MS_zenoSWATH_DC24_VACV_45C_r2-MS_DC24_VACV_zenoSWATH_45C_r2	45C_r2	Q0GNC1	Q0GNC1	INF2_MOUSE	Inf2	4013.74	2653.95	2653.95	4013.74	2653.95	2653.95	2653.95	AAGINVEII	AAGINVEII	AAGINVEII2	2	0.000370278	0.000370278	0.00320256	0.00764331	0.00754717	0.0112867	0.00771208	0	1	4013.74	2653.95	3319.1	1999.18	0.603394	33.3144	33.2339	33.4755	68.2928	32.8587	68.895	Inverted formin-2	0.000750188	0.00260417	0.761506	2417.58	2.98455	0.392378	2.79007	0.999919	0	-10000000	3925.21;819.338;563.876;36.3042;323.13;3671.21;154.916;0;86.5751;430.722;225.181;0;
Z:\MS_data\7600_ZenoTof\2022\202210\20221012_MS_DC24_VACV_zenoSWATH_thermostability\20221010_MS_zenoSWATH_DC24_VACV_45C_r3-MS_DC24_VACV_zenoSWATH_45C_r3.mzML	20221010_MS_zenoSWATH_DC24_VACV_45C_r3-MS_DC24_VACV_zenoSWATH_45C_r3	45C_r3	Q0GNC1	Q0GNC1	INF2_MOUSE	Inf2	10132.9	4152.96	4152.96	10132.9	4152.96	4152.96	4152.96	AAGINVEII	AAGINVEII	AAGINVEII2	2	0.000587889	0.00207212	0.00320256	0.00461894	0.004561	0.0112867	0.00465116	0	1	10132.9	4152.96	7767.07	2527.38	0.85402	33.3952	33.2341	33.5294	68.2928	32.8707	68.979	Inverted formin-2	0.000750188	0.00260417	0.906901	3297.23	3.34308	0.515959	3.89397	0.999358	1.04368	0.205878	5839.55;1684.75;372.141;226.278;331.106;5641.49;277.003;0;316.633;378.991;134.687;16.3803;
Z:\MS_data\7600_ZenoTof\2022\202210\20221012_MS_DC24_VACV_zenoSWATH_thermostability\20221010_MS_zenoSWATH_DC24_VACV_49C_r1-MS_DC24_VACV_zenoSWATH_49C_r1.mzML	20221010_MS_zenoSWATH_DC24_VACV_49C_r1-MS_DC24_VACV_zenoSWATH_49C_r1	49C_r1	Q0GNC1	Q0GNC1	INF2_MOUSE	Inf2	5111.96	3809.95	3809.96	5111.96	3809.95	3809.96	3809.96	AAGINVEII	AAGINVEII	AAGINVEII2	2	0.000897666	0.00182495	0.00320256	0.00934579	0.00920245	0.0112867	0.00941915	0	1	5111.96	3809.95	4010.57	1804.74	0.859893	33.3703	33.236	33.4508	68.2928	32.846	69.396	Inverted formin-2	0.000750188	0.00260417	0.700206	2300.36	3.0754	0.443653	3.66516	0.999497	1.24472	0.333217	2573.09;906.531;172.708;183.739;247.899;2418.33;99.3737;0;196.371;176.421;0;19.7041;
Z:\MS_data\7600_ZenoTof\2022\202210\20221012_MS_DC24_VACV_zenoSWATH_thermostability\20221010_MS_zenoSWATH_DC24_VACV_49C_r2-MS_DC24_VACV_zenoSWATH_49C_r2.mzML	20221010_MS_zenoSWATH_DC24_VACV_49C_r2-MS_DC24_VACV_zenoSWATH_49C_r2	49C_r2	Q0GNC1	Q0GNC1	INF2_MOUSE	Inf2	5810.25	3474.49	3474.49	5810.25	3474.49	3474.49	3474.49	AAGINVEII	AAGINVEII	AAGINVEII2	2	0.000857633	0.00857893	0.00320256	0.00815217	0.00803213	0.0112867	0.00823045	0	1	5810.25	3474.49	4988.47	1991.6	0.852401	33.4485	33.207	33.5559	68.2928	32.7971	69.6442	Inverted formin-2	0.000750188	0.00260417	0.912259	2319.68	3.31245	0.266688	2.41165	0.997834	0	-10000000	4066.63;1191.48;396.437;8.17539;58.767;3293.77;100.794;0;77.9746;202.949;66.0938;69.3196;
Z:\MS_data\7600_ZenoTof\2022\202210\20221012_MS_DC24_VACV_zenoSWATH_thermostability\20221010_MS_zenoSWATH_DC24_VACV_49C_r3-MS_DC24_VACV_zenoSWATH_49C_r3.mzML	20221010_MS_zenoSWATH_DC24_VACV_49C_r3-MS_DC24_VACV_zenoSWATH_49C_r3	49C_r3	Q0GNC1	Q0GNC1	INF2_MOUSE	Inf2	4866.5	3758.13	3758.13	4866.5	3758.13	3758.13	3758.13	AAGINVEII	AAGINVEII	AAGINVEII2	2	0.000940734	0.0534655	0.00320256	0.00857143	0.00843882	0.0112867	0.00865801	0	1	4866.5	3758.13	3855.05	1411.26	0.775985	33.3689	33.2616	33.53	68.2928	32.8457	69.2418	Inverted formin-2	0.000750188	0.00260417	0.911445	1781.54	2.89349	0.248167	1.77506	0.988004	0	-10000000	3229.58;810.353;131.808;37.69;240.959;2662.99;0;0;162.975;88.1154;190.982;0;
Z:\MS_data\7600_ZenoTof\2022\202210\20221012_MS_DC24_VACV_zenoSWATH_thermostability\20221010_MS_zenoSWATH_DC24_VACV_53C_r1-MS_DC24_VACV_zenoSWATH_53C_r1.mzML	20221010_MS_zenoSWATH_DC24_VACV_53C_r1-MS_DC24_VACV_zenoSWATH_53C_r1	53C_r1	Q0GNC1	Q0GNC1	INF2_MOUSE	Inf2	4636.79	3614.53	3614.54	4636.79	3614.53	3614.54	3614.54	AAGINVEII	AAGINVEII	AAGINVEII2	2	0.000898473	0.0635582	0.00320256	0.00739372	0.00724638	0.0112867	0.00747664	0	1	4636.79	3614.53	4811.88	372.306	0.840151	33.3689	33.2347	33.5031	68.2928	32.8894	69.3426	Inverted formin-2	0.000750188	0.00260417	0.392219	358.759	2.41621	0.28291	2.24093	0.982989	0	-10000000	1975.76;650.574;17.21;15.5194;0;2201.9;124.216;0;82.5619;131.509;136.415;0;
Z:\MS_data\7600_ZenoTof\2022\202210\20221012_MS_DC24_VACV_zenoSWATH_thermostability\20221010_MS_zenoSWATH_DC24_VACV_53C_r2-MS_DC24_VACV_zenoSWATH_53C_r2.mzML	20221010_MS_zenoSWATH_DC24_VACV_53C_r2-MS_DC24_VACV_zenoSWATH_53C_r2	53C_r2	Q0GNC1	Q0GNC1	INF2_MOUSE	Inf2	2513.95	2019.85	2019.85	2513.95	2019.85	2019.85	2019.85	AAGINVEII	AAGINVEII	AAGINVEII2	2	0.00102775	0.00861302	0.00320256	0.0103448	0.0101868	0.0112867	0.0104348	0	1	2513.95	2019.85	1918.97	380.314	0.618051	33.4215	33.341	33.502	68.2928	32.8723	69.9211	Inverted formin-2	0.000750188	0.00260417	0.57572	498.232	2.42484	0.336919	1.86512	0.997534	1.13559	0.353972	1613.92;823.159;41.7088;15.658;0;2175.02;0;0;44.1474;117.109;33.6235;0;
Z:\MS_data\7600_ZenoTof\2022\202210\20221012_MS_DC24_VACV_zenoSWATH_thermostability\20221010_MS_zenoSWATH_DC24_VACV_53C_r3-MS_DC24_VACV_zenoSWATH_53C_r3.mzML	20221010_MS_zenoSWATH_DC24_VACV_53C_r3-MS_DC24_VACV_zenoSWATH_53C_r3	53C_r3	Q0GNC1	Q0GNC1	INF2_MOUSE	Inf2	1144.26	1702.55	1702.55	1144.26	1702.55	1702.55	1702.55	AAGINVEII	AAGINVEII	AAGINVEII2	2	0.00117509	0.0620084	0.00320256	0.0111524	0.0109489	0.0112867	0.011257	0	1	1144.26	1702.55	1277.53	411.919	0.538265	33.3947	33.2336	33.4752	68.2928	32.8653	69.4621	Inverted formin-2	0.000750188	0.00260417	0.642058	368.946	1.68473	0.221975	0	0.986391	0	-10000000	1152.26;267.87;0;0;0;1683.81;99.3747;0;34.1141;0;81.8496;0;
Z:\MS_data\7600_ZenoTof\2022\202210\20221012_MS_DC24_VACV_zenoSWATH_thermostability\20221010_MS_zenoSWATH_DC24_VACV_37C_r1-MS_DC24_VACV_zenoSWATH_37C_r1.mzML	20221010_MS_zenoSWATH_DC24_VACV_37C_r1-MS_DC24_VACV_zenoSWATH_37C_r1	37C_r1	Q8QZY9	Q8QZY9	SF3B4_MOUSE	Sf3b4	7760.91	2905.51	1070.49	7760.91	2905.51	1070.49	1070.49	AAIEAM(UniMod:35)NGQYL	AAIEAMNGQYL	AAIEAM(UniMod:35)NGQYL2	2	0.000354269	0.000354269	0.00320256	0.00294985	0.00285714	0.00214592	0.00299401	0	1	7760.91	2905.51	5672.2	8287.62	0.747569	23.2827	23.1754	23.4975	31.6966	23.3352	31.3967	Splicing factor 3B subunit 4	0.000750188	0.00096432	0.958363	11339.4	3.9905	0.486053	4.6812	0.999885	0	-10000000	9678.55;1589.44;2766.18;1688.11;2597.26;1532.64;664.284;397.226;422.195;2437.72;0;659.323;
Z:\MS_data\7600_ZenoTof\2022\202210\20221012_MS_DC24_VACV_zenoSWATH_thermostability\20221010_MS_zenoSWATH_DC24_VACV_37C_r2-MS_DC24_VACV_zenoSWATH_37C_r2.mzML	20221010_MS_zenoSWATH_DC24_VACV_37C_r2-MS_DC24_VACV_zenoSWATH_37C_r2	37C_r2	Q8QZY9	Q8QZY9	SF3B4_MOUSE	Sf3b4	5686.58	2978.41	6016.35	5686.58	2978.41	6016.35	6016.35	AAIEAM(UniMod:35)NGQYL	AAIEAMNGQYL	AAIEAM(UniMod:35)NGQYL2	2	0.000575374	0.000597486	0.00320256	0.00294985	0.00285714	0.00214592	0.00298507	0	1	5686.58	2978.41	4148.06	3472.47	0.909226	23.3354	23.1744	23.4428	31.6966	23.3197	31.7358	Splicing factor 3B subunit 4	0.000750188	0.00096432	0.873853	4760.41	3.23776	0.393553	1.60274	0.999836	0	-10000000	5083.34;804.907;991.267;196.26;1311.74;497.35;141.934;119.917;0;1344.52;0;334.077;
Z:\MS_data\7600_ZenoTof\2022\202210\20221012_MS_DC24_VACV_zenoSWATH_thermostability\20221010_MS_zenoSWATH_DC24_VACV_37C_r3-MS_DC24_VACV_zenoSWATH_37C_r3.mzML	20221010_MS_zenoSWATH_DC24_VACV_37C_r3-MS_DC24_VACV_zenoSWATH_37C_r3	37C_r3	Q8QZY9	Q8QZY9	SF3B4_MOUSE	Sf3b4	7907.41	3611.44	3602.38	7907.41	3611.44	3602.38	3602.38	AAIEAM(UniMod:35)NGQYL	AAIEAMNGQYL	AAIEAM(UniMod:35)NGQYL2	2	2.2104e-05	2.2104e-05	0.00320256	0.00310559	0.003003	0.00214592	0.00314465	0	1	7907.41	3611.44	6043.86	6096.25	0.73564	23.3626	23.121	23.4699	31.6966	23.3559	31.6874	Splicing factor 3B subunit 4	0.000750188	0.00096432	0.963342	7975.96	3.38581	0.379725	2.51619	0.999994	0	-10000000	8609.16;1760.78;2534.69;526.359;1814.1;841.331;691.824;506.94;81.1984;2492.07;0;710.902;
Z:\MS_data\7600_ZenoTof\2022\202210\20221012_MS_DC24_VACV_zenoSWATH_thermostability\20221010_MS_zenoSWATH_DC24_VACV_41C_r1-MS_DC24_VACV_zenoSWATH_41C_r1.mzML	20221010_MS_zenoSWATH_DC24_VACV_41C_r1-MS_DC24_VACV_zenoSWATH_41C_r1	41C_r1	Q8QZY9	Q8QZY9	SF3B4_MOUSE	Sf3b4	7693.24	3289.77	4477.25	7693.24	3289.77	4477.25	4477.25	AAIEAM(UniMod:35)NGQYL	AAIEAMNGQYL	AAIEAM(UniMod:35)NGQYL2	2	7.64278e-05	7.64278e-05	0.00320256	0.00303951	0.00294118	0.00214592	0.00307692	0	1	7693.24	3289.77	5988.94	7992.36	0.809471	23.3097	23.1217	23.4438	31.6966	23.3262	31.6397	Splicing factor 3B subunit 4	0.000750188	0.00096432	0.95295	10266.8	3.92629	0.522085	3.19844	0.999974	0	-10000000	9636.46;1845.46;2017.74;1160.12;2565.01;1206.02;348.671;820.066;248.804;2356.83;0;471.624;
Z:\MS_data\7600_ZenoTof\2022\202210\20221012_MS_DC24_VACV_zenoSWATH_thermostability\20221010_MS_zenoSWATH_DC24_VACV_41C_r2-MS_DC24_VACV_zenoSWATH_41C_r2.mzML	20221010_MS_zenoSWATH_DC24_VACV_41C_r2-MS_DC24_VACV_zenoSWATH_41C_r2	41C_r2	Q8QZY9	Q8QZY9	SF3B4_MOUSE	Sf3b4	5388.36	2538.35	3270.57	5388.36	2538.35	3270.57	3270.57	AAIEAM(UniMod:35)NGQYL	AAIEAMNGQYL	AAIEAM(UniMod:35)NGQYL2	2	8.28276e-05	8.28276e-05	0.00320256	0.00290698	0.0028169	0.00214592	0.00294985	0	1	5388.36	2538.35	3802.54	6567.25	0.609846	23.3088	23.0941	23.443	31.6966	23.3177	31.6282	Splicing factor 3B subunit 4	0.000750188	0.00096432	0.876785	9306.07	3.70231	0.557078	4.36692	0.999977	0.893883	0.140813	8722.77;1312.41;1514.97;908.793;2122.8;783.583;813.561;575.643;294.707;2597.6;52.7222;398.553;
Z:\MS_data\7600_ZenoTof\2022\202210\20221012_MS_DC24_VACV_zenoSWATH_thermostability\20221010_MS_zenoSWATH_DC24_VACV_41C_r3-MS_DC24_VACV_zenoSWATH_41C_r3.mzML	20221010_MS_zenoSWATH_DC24_VACV_41C_r3-MS_DC24_VACV_zenoSWATH_41C_r3	41C_r3	Q8QZY9	Q8QZY9	SF3B4_MOUSE	Sf3b4	10388.6	5116.37	3169.82	10388.6	5116.37	3169.82	3169.82	AAIEAM(UniMod:35)NGQYL	AAIEAMNGQYL	AAIEAM(UniMod:35)NGQYL2	2	2.46228e-05	2.46228e-05	0.00320256	0.00284091	0.00275482	0.00214592	0.00288184	0	1	10388.6	5116.37	7943.74	7204.87	0.866213	23.3353	23.1206	23.5232	31.6966	23.333	31.6881	Splicing factor 3B subunit 4	0.000750188	0.00096432	0.983075	9422.3	3.69613	0.59052	3.78967	0.999993	0	-10000000	6358.67;2536.21;2437.42;828.651;1567.74;825.005;489.293;463.013;109.551;3347.06;0;503.863;
Z:\MS_data\7600_ZenoTof\2022\202210\20221012_MS_DC24_VACV_zenoSWATH_thermostability\20221010_MS_zenoSWATH_DC24_VACV_45C_r1-MS_DC24_VACV_zenoSWATH_45C_r1.mzML	20221010_MS_zenoSWATH_DC24_VACV_45C_r1-MS_DC24_VACV_zenoSWATH_45C_r1	45C_r1	Q8QZY9	Q8QZY9	SF3B4_MOUSE	Sf3b4	9149.5	3571.62	2873.52	9149.5	3571.62	2873.52	2873.52	AAIEAM(UniMod:35)NGQYL	AAIEAMNGQYL	AAIEAM(UniMod:35)NGQYL2	2	0.00062461	0.00126979	0.00320256	0.00296736	0.00287356	0.00214592	0.00301205	0	1	9149.5	3571.62	7060.89	7970.29	0.842304	23.309	23.1211	23.47	31.6966	23.3553	31.5035	Splicing factor 3B subunit 4	0.000750188	0.00096432	0.912295	10327.9	3.62083	0.269333	1.81073	0.999577	0	-10000000	8709.23;1421.53;1763.57;803.302;3696.05;1202.67;487.193;567.739;457.88;2674.64;184.157;452.041;
Z:\MS_data\7600_ZenoTof\2022\202210\20221012_MS_DC24_VACV_zenoSWATH_thermostability\20221010_MS_zenoSWATH_DC24_VACV_45C_r2-MS_DC24_VACV_zenoSWATH_45C_r2.mzML	20221010_MS_zenoSWATH_DC24_VACV_45C_r2-MS_DC24_VACV_zenoSWATH_45C_r2	45C_r2	Q8QZY9	Q8QZY9	SF3B4_MOUSE	Sf3b4	2263.81	1496.87	2111.67	2263.81	1496.87	2111.67	2111.67	AAIEAM(UniMod:35)NGQYL	AAIEAMNGQYL	AAIEAM(UniMod:35)NGQYL2	2	0.000761615	0.00145914	0.00320256	0.00342466	0.00330033	0.00214592	0.00348432	0	1	2263.81	1496.87	1872.03	2399.99	0.589931	23.2554	23.1212	23.3359	31.6966	23.3533	31.1819	Splicing factor 3B subunit 4	0.000750188	0.00096432	0.733446	2902.27	2.44052	0.500198	2.19745	0.999681	0	-10000000	2715.44;885.028;977.62;408.057;908.493;271.166;21.5131;44.1367;104.535;440.284;0;123.458;
Z:\MS_data\7600_ZenoTof\2022\202210\20221012_MS_DC24_VACV_zenoSWATH_thermostability\20221010_MS_zenoSWATH_DC24_VACV_45C_r3-MS_DC24_VACV_zenoSWATH_45C_r3.mzML	20221010_MS_zenoSWATH_DC24_VACV_45C_r3-MS_DC24_VACV_zenoSWATH_45C_r3	45C_r3	Q8QZY9	Q8QZY9	SF3B4_MOUSE	Sf3b4	6022.51	2468.31	2244.51	6022.51	2468.31	2244.51	2244.51	AAIEAM(UniMod:35)NGQYL	AAIEAMNGQYL	AAIEAM(UniMod:35)NGQYL2	2	0.000421669	0.000421669	0.00320256	0.00304878	0.00294985	0.00214592	0.00308642	0	1	6022.51	2468.31	4616.35	5482.96	0.666306	23.2554	23.148	23.3627	31.6966	23.314	31.3063	Splicing factor 3B subunit 4	0.000750188	0.00096432	0.843915	7153.08	2.61532	0.462844	2.67474	0.999869	0	-10000000	6196.84;1723.95;1754.53;89.6797;1618.26;713.699;116.486;680.989;84.8632;2561.15;0;576.935;
Z:\MS_data\7600_ZenoTof\2022\202210\20221012_MS_DC24_VACV_zenoSWATH_thermostability\20221010_MS_zenoSWATH_DC24_VACV_49C_r1-MS_DC24_VACV_zenoSWATH_49C_r1.mzML	20221010_MS_zenoSWATH_DC24_VACV_49C_r1-MS_DC24_VACV_zenoSWATH_49C_r1	49C_r1	Q8QZY9	Q8QZY9	SF3B4_MOUSE	Sf3b4	1259.88	938.987	1498.41	1259.88	938.987	1498.41	1498.41	AAIEAM(UniMod:35)NGQYL	AAIEAMNGQYL	AAIEAM(UniMod:35)NGQYL2	2	0.000897666	0.0123106	0.00320256	0.00505051	0.00478469	0.00214592	0.00512821	0	1	1259.88	938.987	988.431	1754.18	0.617656	23.3373	23.2568	23.4983	31.6966	23.3964	31.4504	Splicing factor 3B subunit 4	0.000750188	0.00096432	0.598063	2235.91	2.05553	0.408392	1.09712	0.996618	0	-10000000	1684.05;742.199;565.619;548.438;194.163;185.172;15.7413;119.917;34.1383;337.011;0;137.786;
Z:\MS_data\7600_ZenoTof\2022\202210\20221012_MS_DC24_VACV_zenoSWATH_thermostability\20221010_MS_zenoSWATH_DC24_VACV_49C_r2-MS_DC24_VACV_zenoSWATH_49C_r2.mzML	20221010_MS_zenoSWATH_DC24_VACV_49C_r2-MS_DC24_VACV_zenoSWATH_49C_r2	49C_r2	Q8QZY9	Q8QZY9	SF3B4_MOUSE	Sf3b4	3909.21	2337.68	2295.44	3909.21	2337.68	2295.44	2295.44	AAIEAM(UniMod:35)NGQYL	AAIEAMNGQYL	AAIEAM(UniMod:35)NGQYL2	2	0.000857633	0.0048569	0.00320256	0.00395257	0.00378788	0.00214592	0.00401606	0	1	3909.21	2337.68	3356.31	3490.92	0.849244	23.282	23.2015	23.4968	31.6966	23.361	31.2746	Splicing factor 3B subunit 4	0.000750188	0.00096432	0.946589	4066	2.53964	0.377851	1.21686	0.998773	0.909543	0.251012	3504.06;703.942;568.494;477.019;1391.13;409.677;465.941;156.765;0;1411.98;0;417.657;
Z:\MS_data\7600_ZenoTof\2022\202210\20221012_MS_DC24_VACV_zenoSWATH_thermostability\20221010_MS_zenoSWATH_DC24_VACV_49C_r3-MS_DC24_VACV_zenoSWATH_49C_r3.mzML	20221010_MS_zenoSWATH_DC24_VACV_49C_r3-MS_DC24_VACV_zenoSWATH_49C_r3	49C_r3	Q8QZY9	Q8QZY9	SF3B4_MOUSE	Sf3b4	2693.34	2079.91	1596.66	2693.34	2079.91	1596.66	1596.66	AAIEAM(UniMod:35)NGQYL	AAIEAMNGQYL	AAIEAM(UniMod:35)NGQYL2	2	0.000940734	0.10604	0.00320256	0.00446429	0.00425532	0.00214592	0.00454545	0	1	2693.34	2079.91	2133.55	2206.78	0.705235	23.3097	23.1755	23.4975	31.6966	23.3103	31.6011	Splicing factor 3B subunit 4	0.000750188	0.00096432	0.956891	2785.77	1.92471	0.23885	1.22992	0.976486	0	-10000000	2447.65;450.269;213.979;165.73;1048.53;323.057;77.6569;399.099;31.6306;1061.55;0;24.1184;
Z:\MS_data\7600_ZenoTof\2022\202210\20221012_MS_DC24_VACV_zenoSWATH_thermostability\20221010_MS_zenoSWATH_DC24_VACV_53C_r1-MS_DC24_VACV_zenoSWATH_53C_r1.mzML	20221010_MS_zenoSWATH_DC24_VACV_53C_r1-MS_DC24_VACV_zenoSWATH_53C_r1	53C_r1	Q8QZY9	Q8QZY9	SF3B4_MOUSE	Sf3b4	473.837	369.372	368.446	473.837	369.372	368.446	368.446	AAIEAM(UniMod:35)NGQYL	AAIEAMNGQYL	AAIEAM(UniMod:35)NGQYL2	2	0.000898473	0.246297	0.00320256	0.00943396	0.00928793	0.00214592	0.00952381	0	1	473.837	369.372	491.729	1123.35	0.800554	23.3097	23.1755	23.3634	31.6966	23.33	31.5131	Splicing factor 3B subunit 4	0.000750188	0.00096432	0.841072	1082.48	1.44455	0.168495	0.170647	0.937155	0	-10000000	430.501;124.013;307.605;0;257.199;547.771;0;0;0;99.7593;0;164.771;
Z:\MS_data\7600_ZenoTof\2022\202210\20221012_MS_DC24_VACV_zenoSWATH_thermostability\20221010_MS_zenoSWATH_DC24_VACV_53C_r2-MS_DC24_VACV_zenoSWATH_53C_r2.mzML	20221010_MS_zenoSWATH_DC24_VACV_53C_r2-MS_DC24_VACV_zenoSWATH_53C_r2	53C_r2	Q8QZY9	Q8QZY9	SF3B4_MOUSE	Sf3b4	1032.61	829.657	827.578	1032.61	829.657	827.578	827.578	AAIEAM(UniMod:35)NGQYL	AAIEAMNGQYL	AAIEAM(UniMod:35)NGQYL2	2	0.00102775	0.0178689	0.00320256	0.0103448	0.0101868	0.00214592	0.0104348	0	1	1032.61	829.657	788.22	1542.05	0.579223	23.3627	23.1479	23.4969	31.6966	23.3794	31.5775	Splicing factor 3B subunit 4	0.000750188	0.00096432	0.876566	2020.18	1.65065	0.374601	0.392388	0.994898	0	-10000000	778.026;806.316;784.789;81.7748;1182.54;32.6404;12.3307;147.608;34.1379;335.41;0;12.1788;
Z:\MS_data\7600_ZenoTof\2022\202210\20221012_MS_DC24_VACV_zenoSWATH_thermostability\20221010_MS_zenoSWATH_DC24_VACV_57C_r3-MS_DC24_VACV_zenoSWATH_57C_r3.mzML	20221010_MS_zenoSWATH_DC24_VACV_57C_r3-MS_DC24_VACV_zenoSWATH_57C_r3	57C_r3	Q8QZY9	Q8QZY9	SF3B4_MOUSE	Sf3b4	104.697	191.692	0	104.697	191.692			AAIEAM(UniMod:35)NGQYL	AAIEAMNGQYL	AAIEAM(UniMod:35)NGQYL2	2	0.0228216	0.415923	0.00320256	0.0569106	0.0583658	0.00214592	0.0576132	0	1	104.697	191.692	111.055	80.344	0.801784	23.3899	23.3363	23.4436	31.6966	23.3764	31.7062	Splicing factor 3B subunit 4	0.000750188	0.00096432	0.413353	75.7442	1.12346	0.00955315	0	0.801416	0	-10000000	0;43.2709;81.9016;0;105.381;0;0;0;0;0;0;0;
Z:\MS_data\7600_ZenoTof\2022\202210\20221012_MS_DC24_VACV_zenoSWATH_thermostability\20221010_MS_zenoSWATH_DC24_VACV_37C_r1-MS_DC24_VACV_zenoSWATH_37C_r1.mzML	20221010_MS_zenoSWATH_DC24_VACV_37C_r1-MS_DC24_VACV_zenoSWATH_37C_r1	37C_r1	Q8QZY9	Q8QZY9	SF3B4_MOUSE	Sf3b4	7760.91	2905.51	1070.49	7760.91	2905.51	1070.49	1070.49	AAIEAMNGQYL	AAIEAMNGQYL	AAIEAMNGQYL2	2	0.00101626	0.10862	0.00418994	0.00294985	0.00285714	0.00214592	0.00299401	0	1	115.233	43.1405	84.22	425.987	0.929671	29.0802	28.9997	29.1339	52.7182	28.8555	53.3609	Splicing factor 3B subunit 4	0.00157109	0.00096432	0.851478	582.851	1.47505	0.192418	0.114983	0.965825	0	-10000000	120.099;115.233;267.047;132.989;0;0;0;328.105;0;0;30.4641;0;
Z:\MS_data\7600_ZenoTof\2022\202210\20221012_MS_DC24_VACV_zenoSWATH_thermostability\20221010_MS_zenoSWATH_DC24_VACV_37C_r2-MS_DC24_VACV_zenoSWATH_37C_r2.mzML	20221010_MS_zenoSWATH_DC24_VACV_37C_r2-MS_DC24_VACV_zenoSWATH_37C_r2	37C_r2	Q8QZY9	Q8QZY9	SF3B4_MOUSE	Sf3b4	5686.58	2978.41	6016.35	5686.58	2978.41	6016.35	6016.35	AAIEAMNGQYL	AAIEAMNGQYL	AAIEAMNGQYL2	2	0.000485008	0.000485008	0.00418994	0.00294985	0.00285714	0.00214592	0.00298507	0	1	4783.42	2505.37	3489.26	3387.37	0.906152	29.079	28.9448	29.2132	52.7182	28.8459	53.3173	Splicing factor 3B subunit 4	0.00157109	0.00096432	0.963589	4643.74	4.21337	0.578082	3.42037	0.999867	0	-10000000	1668.84;402.61;730.761;3076.51;572.577;281.353;442.819;792.328;0;29.9666;978.346;270.408;
Z:\MS_data\7600_ZenoTof\2022\202210\20221012_MS_DC24_VACV_zenoSWATH_thermostability\20221010_MS_zenoSWATH_DC24_VACV_37C_r3-MS_DC24_VACV_zenoSWATH_37C_r3.mzML	20221010_MS_zenoSWATH_DC24_VACV_37C_r3-MS_DC24_VACV_zenoSWATH_37C_r3	37C_r3	Q8QZY9	Q8QZY9	SF3B4_MOUSE	Sf3b4	7907.41	3611.44	3602.38	7907.41	3611.44	3602.38	3602.38	AAIEAMNGQYL	AAIEAMNGQYL	AAIEAMNGQYL2	2	0.0121099	0.977497	0.00418994	0.00310559	0.003003	0.00214592	0.00314465	0	1	84.1302	38.4236	64.3031	113.192	0.83084	29.2134	29.1597	29.2939	52.7182	28.8449	53.5623	Splicing factor 3B subunit 4	0.00157109	0.00096432	0.295525	148.093	1.04617	0.104672	0	0.780007	0	-10000000	30.548;72.5894;233.01;88.6587;0;0;307.144;174.321;0;0;0;0;
Z:\MS_data\7600_ZenoTof\2022\202210\20221012_MS_DC24_VACV_zenoSWATH_thermostability\20221010_MS_zenoSWATH_DC24_VACV_41C_r1-MS_DC24_VACV_zenoSWATH_41C_r1.mzML	20221010_MS_zenoSWATH_DC24_VACV_41C_r1-MS_DC24_VACV_zenoSWATH_41C_r1	41C_r1	Q8QZY9	Q8QZY9	SF3B4_MOUSE	Sf3b4	7693.24	3289.77	4477.25	7693.24	3289.77	4477.25	4477.25	AAIEAMNGQYL	AAIEAMNGQYL	AAIEAMNGQYL2	2	2.58269e-05	2.58269e-05	0.00418994	0.00303951	0.00294118	0.00214592	0.00307692	0	1	2527.99	1081.02	1967.96	2173.75	0.839748	29.107	29.0264	29.1875	52.7182	28.8404	53.266	Splicing factor 3B subunit 4	0.00157109	0.00096432	0.878397	2792.35	4.39977	0.48899	2.74343	0.999991	0	-10000000	949.084;541.521;780.364;1789.8;874.3;328.83;696.524;1771.65;82.9475;0;835.542;542.14;
Z:\MS_data\7600_ZenoTof\2022\202210\20221012_MS_DC24_VACV_zenoSWATH_thermostability\20221010_MS_zenoSWATH_DC24_VACV_41C_r2-MS_DC24_VACV_zenoSWATH_41C_r2.mzML	20221010_MS_zenoSWATH_DC24_VACV_41C_r2-MS_DC24_VACV_zenoSWATH_41C_r2	41C_r2	Q8QZY9	Q8QZY9	SF3B4_MOUSE	Sf3b4	5388.36	2538.35	3270.57	5388.36	2538.35	3270.57	3270.57	AAIEAMNGQYL	AAIEAMNGQYL	AAIEAMNGQYL2	2	0.0010543	0.0884001	0.00418994	0.00290698	0.0028169	0.00214592	0.00294985	0	1	1550.77	730.54	1094.38	1618.71	0.775659	29.1061	29.0256	29.294	52.7182	28.8386	53.3267	Splicing factor 3B subunit 4	0.00157109	0.00096432	0.875134	2293.78	2.20194	0.420497	2.27321	0.97579	0	-10000000	1005.79;298.982;419.506;1267.18;706.698;202.315;152.535;318.316;89.1391;0;0;312.356;
Z:\MS_data\7600_ZenoTof\2022\202210\20221012_MS_DC24_VACV_zenoSWATH_thermostability\20221010_MS_zenoSWATH_DC24_VACV_41C_r3-MS_DC24_VACV_zenoSWATH_41C_r3.mzML	20221010_MS_zenoSWATH_DC24_VACV_41C_r3-MS_DC24_VACV_zenoSWATH_41C_r3	41C_r3	Q8QZY9	Q8QZY9	SF3B4_MOUSE	Sf3b4	10388.6	5116.37	3169.82	10388.6	5116.37	3169.82	3169.82	AAIEAMNGQYL	AAIEAMNGQYL	AAIEAMNGQYL2	2	0.000459829	0.000459829	0.00418994	0.00284091	0.00275482	0.00214592	0.00288184	0	1	522.046	257.108	399.188	964.917	0.652005	29.1859	29.0517	29.2664	52.7182	28.865	53.3855	Splicing factor 3B subunit 4	0.00157109	0.00096432	0.874168	1261.89	2.67357	0.713659	2.53699	0.999878	0.707184	0.20319	404.864;226.705;231.861;497.541;203.916;80.9255;40.2095;239.992;0;0;97.7387;317.896;
Z:\MS_data\7600_ZenoTof\2022\202210\20221012_MS_DC24_VACV_zenoSWATH_thermostability\20221010_MS_zenoSWATH_DC24_VACV_45C_r1-MS_DC24_VACV_zenoSWATH_45C_r1.mzML	20221010_MS_zenoSWATH_DC24_VACV_45C_r1-MS_DC24_VACV_zenoSWATH_45C_r1	45C_r1	Q8QZY9	Q8QZY9	SF3B4_MOUSE	Sf3b4	9149.5	3571.62	2873.52	9149.5	3571.62	2873.52	2873.52	AAIEAMNGQYL	AAIEAMNGQYL	AAIEAMNGQYL2	2	0.00062461	0.00240859	0.00418994	0.00296736	0.00287356	0.00214592	0.00301205	0	1	857.352	334.678	661.64	1256.79	0.526028	29.106	29.0255	29.2134	52.7182	28.8566	53.3056	Splicing factor 3B subunit 4	0.00157109	0.00096432	0.94635	1628.55	3.043	0.299772	2.19342	0.999197	1.36174	0.537236	337.495;283.617;474.683;1481.25;304.093;121.389;272.123;836.029;87.8999;0;0;117.134;
Z:\MS_data\7600_ZenoTof\2022\202210\20221012_MS_DC24_VACV_zenoSWATH_thermostability\20221010_MS_zenoSWATH_DC24_VACV_45C_r2-MS_DC24_VACV_zenoSWATH_45C_r2.mzML	20221010_MS_zenoSWATH_DC24_VACV_45C_r2-MS_DC24_VACV_zenoSWATH_45C_r2	45C_r2	Q8QZY9	Q8QZY9	SF3B4_MOUSE	Sf3b4	2263.81	1496.87	2111.67	2263.81	1496.87	2111.67	2111.67	AAIEAMNGQYL	AAIEAMNGQYL	AAIEAMNGQYL2	2	0.000761615	0.00922334	0.00418994	0.00342466	0.00330033	0.00214592	0.00348432	0	1	806.541	533.298	666.958	1209.67	0.803688	29.1332	29.0527	29.2405	52.7182	28.8836	53.3037	Splicing factor 3B subunit 4	0.00157109	0.00096432	0.864353	1462.84	2.27866	0.363422	1.46755	0.997985	0	-10000000	342.514;151.763;206.673;614.487;82.6103;93.0652;153.572;182.439;0;0;146.609;47.223;
Z:\MS_data\7600_ZenoTof\2022\202210\20221012_MS_DC24_VACV_zenoSWATH_thermostability\20221010_MS_zenoSWATH_DC24_VACV_45C_r3-MS_DC24_VACV_zenoSWATH_45C_r3.mzML	20221010_MS_zenoSWATH_DC24_VACV_45C_r3-MS_DC24_VACV_zenoSWATH_45C_r3	45C_r3	Q8QZY9	Q8QZY9	SF3B4_MOUSE	Sf3b4	6022.51	2468.31	2244.51	6022.51	2468.31	2244.51	2244.51	AAIEAMNGQYL	AAIEAMNGQYL	AAIEAMNGQYL2	2	0.000587889	0.00563455	0.00418994	0.00304878	0.00294985	0.00214592	0.00308642	0	1	759.602	311.321	582.247	1018.91	0.829774	29.1601	29.0258	29.2406	52.7182	28.8648	53.4013	Splicing factor 3B subunit 4	0.00157109	0.00096432	0.932094	1329.27	2.5463	0.292087	1.44948	0.998255	0.885349	0.221156	152.95;277.186;103.818;595.238;84.9841;309.677;214.537;1078.41;217.894;0;540.421;150.111;
Z:\MS_data\7600_ZenoTof\2022\202210\20221012_MS_DC24_VACV_zenoSWATH_thermostability\20221010_MS_zenoSWATH_DC24_VACV_49C_r1-MS_DC24_VACV_zenoSWATH_49C_r1.mzML	20221010_MS_zenoSWATH_DC24_VACV_49C_r1-MS_DC24_VACV_zenoSWATH_49C_r1	49C_r1	Q8QZY9	Q8QZY9	SF3B4_MOUSE	Sf3b4	1259.88	938.987	1498.41	1259.88	938.987	1498.41	1498.41	AAIEAMNGQYL	AAIEAMNGQYL	AAIEAMNGQYL2	2	0.000897666	0.00866422	0.00418994	0.00505051	0.00478469	0.00214592	0.00512821	0	1	601.176	448.057	471.65	981.416	0.810846	29.135	29.0544	29.2155	52.7182	28.8434	53.4092	Splicing factor 3B subunit 4	0.00157109	0.00096432	0.830262	1250.93	3.15595	0.532607	2.8118	0.997618	0	-10000000	207.56;76.6659;243.78;729.394;92.1059;246.013;0;820.031;0;0;215.471;134.281;
Z:\MS_data\7600_ZenoTof\2022\202210\20221012_MS_DC24_VACV_zenoSWATH_thermostability\20221010_MS_zenoSWATH_DC24_VACV_49C_r2-MS_DC24_VACV_zenoSWATH_49C_r2.mzML	20221010_MS_zenoSWATH_DC24_VACV_49C_r2-MS_DC24_VACV_zenoSWATH_49C_r2	49C_r2	Q8QZY9	Q8QZY9	SF3B4_MOUSE	Sf3b4	3909.21	2337.68	2295.44	3909.21	2337.68	2295.44	2295.44	AAIEAMNGQYL	AAIEAMNGQYL	AAIEAMNGQYL2	2	0.00471698	0.221398	0.00418994	0.00395257	0.00378788	0.00214592	0.00401606	0	1	591.277	353.58	507.649	1034.76	0.86132	29.0793	29.0257	29.2672	52.7182	28.9333	53.0915	Splicing factor 3B subunit 4	0.00157109	0.00096432	0.863574	1205.22	2.05451	0.129172	1.35934	0.946961	0	-10000000	0;43.2714;139.77;576.569;98.9901;0;0;379.449;0;0;27.9255;195.223;
Z:\MS_data\7600_ZenoTof\2022\202210\20221012_MS_DC24_VACV_zenoSWATH_thermostability\20221010_MS_zenoSWATH_DC24_VACV_49C_r3-MS_DC24_VACV_zenoSWATH_49C_r3.mzML	20221010_MS_zenoSWATH_DC24_VACV_49C_r3-MS_DC24_VACV_zenoSWATH_49C_r3	49C_r3	Q8QZY9	Q8QZY9	SF3B4_MOUSE	Sf3b4	2693.34	2079.91	1596.66	2693.34	2079.91	1596.66	1596.66	AAIEAMNGQYL	AAIEAMNGQYL	AAIEAMNGQYL2	2	0.00312744	0.259178	0.00418994	0.00446429	0.00425532	0.00214592	0.00454545	0	1	226.391	174.829	179.338	817.8	0.608501	29.1607	29.0534	29.2681	52.7182	28.8947	53.4315	Splicing factor 3B subunit 4	0.00157109	0.00096432	0.922399	1032.37	1.52	0.291953	1.42549	0.944415	0	-10000000	24.4802;226.391;66.9054;552.372;30.3855;49.6345;0;239.035;148.566;0;101.864;0;
Z:\MS_data\7600_ZenoTof\2022\202210\20221012_MS_DC24_VACV_zenoSWATH_thermostability\20221010_MS_zenoSWATH_DC24_VACV_37C_r1-MS_DC24_VACV_zenoSWATH_37C_r1.mzML	20221010_MS_zenoSWATH_DC24_VACV_37C_r1-MS_DC24_VACV_zenoSWATH_37C_r1	37C_r1	Q6PB66	Q6PB66	LPPRC_MOUSE	Lrpprc	1651	618.096	618.096	1651	618.096	618.096	618.096	AAIENIEHL	AAIENIEHL	AAIENIEHL2	2	0.000590319	0.0103189	0.00320256	0.00535332	0.00529101	0.0112867	0.00539374	0	1	1651	618.096	1206.66	1180.25	0.696806	23.7352	23.6278	23.8158	33.2173	23.7324	33.2804	Leucine-rich PPR motif-containing protein, mitochondrial	0.000750188	0.00096432	0.751102	1614.86	1.36522	0.333551	0.874308	0.99665	0.869216	0.112505	1566.92;1157.42;593.746;249.225;475.985;207.762;244.13;304.152;0;0;0;39.2767;
Z:\MS_data\7600_ZenoTof\2022\202210\20221012_MS_DC24_VACV_zenoSWATH_thermostability\20221010_MS_zenoSWATH_DC24_VACV_37C_r2-MS_DC24_VACV_zenoSWATH_37C_r2.mzML	20221010_MS_zenoSWATH_DC24_VACV_37C_r2-MS_DC24_VACV_zenoSWATH_37C_r2	37C_r2	Q6PB66	Q6PB66	LPPRC_MOUSE	Lrpprc	1349	706.554	706.554	1349	706.554	706.554	706.554	AAIENIEHL	AAIENIEHL	AAIENIEHL2	2	0.000575374	0.00404272	0.00320256	0.00538793	0.00532481	0.0112867	0.00542299	0	1	1349	706.554	984.025	778.181	0.802143	23.761	23.4389	23.8415	33.2173	23.7325	33.3566	Leucine-rich PPR motif-containing protein, mitochondrial	0.000750188	0.00096432	0.527295	1066.81	2.04017	0.323525	0.668254	0.998891	0	-10000000	1230.34;3770.61;323.992;552.207;79.174;325.597;241.275;300.303;0;0;0;0;
Z:\MS_data\7600_ZenoTof\2022\202210\20221012_MS_DC24_VACV_zenoSWATH_thermostability\20221010_MS_zenoSWATH_DC24_VACV_37C_r3-MS_DC24_VACV_zenoSWATH_37C_r3.mzML	20221010_MS_zenoSWATH_DC24_VACV_37C_r3-MS_DC24_VACV_zenoSWATH_37C_r3	37C_r3	Q6PB66	Q6PB66	LPPRC_MOUSE	Lrpprc	228.889	104.537	0	228.889	104.537			AAIENIEHL	AAIENIEHL	AAIENIEHL2	2	0.0139082	1	0.00320256	0.0214345	0.0212418	0.0112867	0.0207297	0	1	228.889	104.537	174.947	1472.25	0.44762	23.5466	23.3855	23.7076	33.2173	23.7507	32.5466	Leucine-rich PPR motif-containing protein, mitochondrial	0.000750188	0.00096432	0.373182	1926.2	1.77756	0.175581	1.19533	0.767343	0	-10000000	1435.63;8409.09;80.2044;714.646;126.994;516.519;86.9562;331.639;0;26.652;126.069;0;
Z:\MS_data\7600_ZenoTof\2022\202210\20221012_MS_DC24_VACV_zenoSWATH_thermostability\20221010_MS_zenoSWATH_DC24_VACV_41C_r1-MS_DC24_VACV_zenoSWATH_41C_r1.mzML	20221010_MS_zenoSWATH_DC24_VACV_41C_r1-MS_DC24_VACV_zenoSWATH_41C_r1	41C_r1	Q6PB66	Q6PB66	LPPRC_MOUSE	Lrpprc	3172.36	1356.56	1356.56	3172.36	1356.56	1356.56	1356.56	AAIENIEHL	AAIENIEHL	AAIENIEHL2	2	0.000600601	0.00490537	0.00320256	0.00638978	0.00631579	0.0112867	0.00643777	0	1	3172.36	1356.56	2469.58	861.158	0.642881	23.7889	23.4937	23.8694	33.2173	23.7251	33.4438	Leucine-rich PPR motif-containing protein, mitochondrial	0.000750188	0.00096432	0.763228	1106.22	1.47147	0.229	0.507645	0.998339	0	-10000000	2760.42;7247.52;684.337;616.913;362.319;733.584;344.968;34.4136;39.6113;0;63.0351;298.082;
Z:\MS_data\7600_ZenoTof\2022\202210\20221012_MS_DC24_VACV_zenoSWATH_thermostability\20221010_MS_zenoSWATH_DC24_VACV_41C_r2-MS_DC24_VACV_zenoSWATH_41C_r2.mzML	20221010_MS_zenoSWATH_DC24_VACV_41C_r2-MS_DC24_VACV_zenoSWATH_41C_r2	41C_r2	Q6PB66	Q6PB66	LPPRC_MOUSE	Lrpprc	607.542	286.201	286.201	607.542	286.201	286.201	286.201	AAIENIEHL	AAIENIEHL	AAIENIEHL2	2	0.00066313	0.0463729	0.00320256	0.00618557	0.00612245	0.0112867	0.00623053	0	1	607.542	286.201	428.74	656.347	0.612107	23.7076	23.6539	23.8149	33.2173	23.7232	33.2143	Leucine-rich PPR motif-containing protein, mitochondrial	0.000750188	0.00096432	0.53417	930.072	1.45957	0.55266	0.535626	0.987152	0	-10000000	815.479;912.705;350.823;138.786;298.979;100.78;445.396;0;0;0;409.715;0;
Z:\MS_data\7600_ZenoTof\2022\202210\20221012_MS_DC24_VACV_zenoSWATH_thermostability\20221010_MS_zenoSWATH_DC24_VACV_41C_r3-MS_DC24_VACV_zenoSWATH_41C_r3.mzML	20221010_MS_zenoSWATH_DC24_VACV_41C_r3-MS_DC24_VACV_zenoSWATH_41C_r3	41C_r3	Q6PB66	Q6PB66	LPPRC_MOUSE	Lrpprc	117.506	57.8719	57.8719	117.506	57.8719	57.8719	57.8719	AAIENIEHL	AAIENIEHL	AAIENIEHL2	2	0.00491159	0.404887	0.00320256	0.0102041	0.010101	0.0112867	0.0102708	0	1	117.506	57.8719	89.8525	1862	0.567335	23.573	23.3851	23.6803	33.2173	23.7582	32.667	Leucine-rich PPR motif-containing protein, mitochondrial	0.000750188	0.00096432	0.674517	2435.06	2.66599	0.0800406	0.852714	0.902679	1.31056	0.209488	1594.9;7550.52;0;1381.99;344.448;366.571;0;91.1296;0;0;35.0198;0;
Z:\MS_data\7600_ZenoTof\2022\202210\20221012_MS_DC24_VACV_zenoSWATH_thermostability\20221010_MS_zenoSWATH_DC24_VACV_45C_r1-MS_DC24_VACV_zenoSWATH_45C_r1.mzML	20221010_MS_zenoSWATH_DC24_VACV_45C_r1-MS_DC24_VACV_zenoSWATH_45C_r1	45C_r1	Q6PB66	Q6PB66	LPPRC_MOUSE	Lrpprc	351.133	137.069	137.069	351.133	137.069	137.069	137.069	AAIENIEHL	AAIENIEHL	AAIENIEHL2	2	0.00164384	0.169945	0.00320256	0.00548847	0.00542299	0.0112867	0.00553097	0	1	351.133	137.069	270.978	350.553	0.455403	23.815	23.7614	23.8687	33.2173	23.753	33.429	Leucine-rich PPR motif-containing protein, mitochondrial	0.000750188	0.00096432	0.31547	454.246	1.38323	0.587056	1.55244	0.946347	0	-10000000	455.493;207.476;656.931;242.189;108.179;95.6862;81.8538;130.928;0;0;0;0;
Z:\MS_data\7600_ZenoTof\2022\202210\20221012_MS_DC24_VACV_zenoSWATH_thermostability\20221010_MS_zenoSWATH_DC24_VACV_45C_r2-MS_DC24_VACV_zenoSWATH_45C_r2.mzML	20221010_MS_zenoSWATH_DC24_VACV_45C_r2-MS_DC24_VACV_zenoSWATH_45C_r2	45C_r2	Q6PB66	Q6PB66	LPPRC_MOUSE	Lrpprc	2282.51	1509.24	1509.24	2282.51	1509.24	1509.24	1509.24	AAIENIEHL	AAIENIEHL	AAIENIEHL2	2	0.000761615	0.0454646	0.00320256	0.00764331	0.00754717	0.0112867	0.00771208	0	1	2282.51	1509.24	1887.49	914.957	0.648103	23.7346	23.4394	23.8957	33.2173	23.7573	33.2032	Leucine-rich PPR motif-containing protein, mitochondrial	0.000750188	0.00096432	0.651344	1106.44	1.15026	0.438223	0.321789	0.990144	1.01057	0.111104	2242.22;4115.26;341.592;1136.67;60.6736;289.711;0;109.2;0;0;0;0;
Z:\MS_data\7600_ZenoTof\2022\202210\20221012_MS_DC24_VACV_zenoSWATH_thermostability\20221010_MS_zenoSWATH_DC24_VACV_45C_r3-MS_DC24_VACV_zenoSWATH_45C_r3.mzML	20221010_MS_zenoSWATH_DC24_VACV_45C_r3-MS_DC24_VACV_zenoSWATH_45C_r3	45C_r3	Q6PB66	Q6PB66	LPPRC_MOUSE	Lrpprc	1992.9	816.787	816.787	1992.9	816.787	816.787	816.787	AAIENIEHL	AAIENIEHL	AAIENIEHL2	2	0.00435019	0.313722	0.00320256	0.0107632	0.0106486	0.0112867	0.0108374	0	1	1992.9	816.787	1527.59	1316.3	0.690496	23.6541	23.5736	23.842	33.2173	23.7572	32.9594	Leucine-rich PPR motif-containing protein, mitochondrial	0.000750188	0.00096432	0.550305	1717.24	1.3074	0.201647	0.866045	0.911321	0.911714	0.353335	1886.82;4253.19;255.617;508.814;224.354;880.658;82.2617;216.096;0;0;0;91.7183;
Z:\MS_data\7600_ZenoTof\2022\202210\20221012_MS_DC24_VACV_zenoSWATH_thermostability\20221010_MS_zenoSWATH_DC24_VACV_49C_r1-MS_DC24_VACV_zenoSWATH_49C_r1.mzML	20221010_MS_zenoSWATH_DC24_VACV_49C_r1-MS_DC24_VACV_zenoSWATH_49C_r1	49C_r1	Q6PB66	Q6PB66	LPPRC_MOUSE	Lrpprc	241.455	179.956	179.956	241.455	179.956	179.956	179.956	AAIENIEHL	AAIENIEHL	AAIENIEHL2	2	0.00958702	0.649927	0.00320256	0.0169051	0.0179487	0.0112867	0.0170157	0	1	241.455	179.956	189.432	372.1	0.702429	23.575	23.4139	23.6825	33.2173	23.769	32.4009	Leucine-rich PPR motif-containing protein, mitochondrial	0.000750188	0.00096432	0.185008	474.286	1.97835	0.241474	0.368426	0.848075	0	-10000000	589.753;3019.09;0;334.256;0;439;57.9708;69.0194;0;0;0;91.7182;
Z:\MS_data\7600_ZenoTof\2022\202210\20221012_MS_DC24_VACV_zenoSWATH_thermostability\20221010_MS_zenoSWATH_DC24_VACV_49C_r2-MS_DC24_VACV_zenoSWATH_49C_r2.mzML	20221010_MS_zenoSWATH_DC24_VACV_49C_r2-MS_DC24_VACV_zenoSWATH_49C_r2	49C_r2	Q6PB66	Q6PB66	LPPRC_MOUSE	Lrpprc	1259.42	753.127	753.127	1259.42	753.127	753.127	753.127	AAIENIEHL	AAIENIEHL	AAIENIEHL2	2	0.00166113	0.079055	0.00320256	0.00815217	0.00803213	0.0112867	0.00823045	0	1	1259.42	753.127	1081.3	760.902	0.655727	23.7882	23.6808	23.8687	33.2173	23.7697	33.3334	Leucine-rich PPR motif-containing protein, mitochondrial	0.000750188	0.00096432	0.3557	886.249	1.21098	0.155229	0.443274	0.980393	0	-10000000	1199.13;435.776;534.313;111.028;32.61;223.266;261.073;35.5668;0;0;0;0;
Z:\MS_data\7600_ZenoTof\2022\202210\20221012_MS_DC24_VACV_zenoSWATH_thermostability\20221010_MS_zenoSWATH_DC24_VACV_49C_r3-MS_DC24_VACV_zenoSWATH_49C_r3.mzML	20221010_MS_zenoSWATH_DC24_VACV_49C_r3-MS_DC24_VACV_zenoSWATH_49C_r3	49C_r3	Q6PB66	Q6PB66	LPPRC_MOUSE	Lrpprc	373.194	288.197	288.197	373.194	288.197	288.197	288.197	AAIENIEHL	AAIENIEHL	AAIENIEHL2	2	0.00663717	0.539325	0.00320256	0.0126263	0.0124533	0.0112867	0.0127389	0	1	373.194	288.197	295.629	823.282	0.214991	23.601	23.3863	23.7352	33.2173	23.7957	32.6957	Leucine-rich PPR motif-containing protein, mitochondrial	0.000750188	0.00096432	0.0734359	1039.29	1.28521	0.248616	0.292696	0.890888	0.901612	0.239504	986.321;3530.8;62.317;459.161;7.52554;95.6851;0;0;0;0;0;0;
Z:\MS_data\7600_ZenoTof\2022\202210\20221012_MS_DC24_VACV_zenoSWATH_thermostability\20221010_MS_zenoSWATH_DC24_VACV_53C_r1-MS_DC24_VACV_zenoSWATH_53C_r1.mzML	20221010_MS_zenoSWATH_DC24_VACV_53C_r1-MS_DC24_VACV_zenoSWATH_53C_r1	53C_r1	Q6PB66	Q6PB66	LPPRC_MOUSE	Lrpprc	708.131	552.012	552.012	708.131	552.012	552.012	552.012	AAIENIEHL	AAIENIEHL	AAIENIEHL2	2	0.000898473	0.00227858	0.00320256	0.00739372	0.00724638	0.0112867	0.00747664	0	1	708.131	552.012	734.871	812.781	0.859446	23.7889	23.6548	23.8695	33.2173	23.7794	33.3503	Leucine-rich PPR motif-containing protein, mitochondrial	0.000750188	0.00096432	0.558049	783.207	1.86084	0.341077	0.278784	0.99938	0.666659	0.391124	535.936;320.402;394.675;277.57;108.18;8.85971;286.794;0;0;0;0;0;
Z:\MS_data\7600_ZenoTof\2022\202210\20221012_MS_DC24_VACV_zenoSWATH_thermostability\20221010_MS_zenoSWATH_DC24_VACV_53C_r2-MS_DC24_VACV_zenoSWATH_53C_r2.mzML	20221010_MS_zenoSWATH_DC24_VACV_53C_r2-MS_DC24_VACV_zenoSWATH_53C_r2	53C_r2	Q6PB66	Q6PB66	LPPRC_MOUSE	Lrpprc	701.338	563.494	563.494	701.338	563.494	563.494	563.494	AAIENIEHL	AAIENIEHL	AAIENIEHL2	2	0.00102775	0.00457218	0.00320256	0.0103448	0.0101868	0.0112867	0.0104348	0	1	701.338	563.494	535.35	507.587	0.704892	23.8151	23.7077	23.9224	33.2173	23.7964	33.3794	Leucine-rich PPR motif-containing protein, mitochondrial	0.000750188	0.00096432	0.72209	664.967	1.46192	0.342479	0.184981	0.998689	0.818934	0.358245	708.661;526.653;550.471;352.63;75.0976;100.78;237.803;0;0;0;0;0;
Z:\MS_data\7600_ZenoTof\2022\202210\20221012_MS_DC24_VACV_zenoSWATH_thermostability\20221010_MS_zenoSWATH_DC24_VACV_53C_r3-MS_DC24_VACV_zenoSWATH_53C_r3.mzML	20221010_MS_zenoSWATH_DC24_VACV_53C_r3-MS_DC24_VACV_zenoSWATH_53C_r3	53C_r3	Q6PB66	Q6PB66	LPPRC_MOUSE	Lrpprc	17.4025	25.8934	25.8934	17.4025	25.8934	25.8934	25.8934	AAIENIEHL	AAIENIEHL	AAIENIEHL2	2	0.00117509	0.0882012	0.00320256	0.0111524	0.0109489	0.0112867	0.011257	0	1	17.4025	25.8934	19.4294	354.492	0.801784	23.8149	23.7612	23.8686	33.2173	23.7879	33.3415	Leucine-rich PPR motif-containing protein, mitochondrial	0.000750188	0.00096432	0.324129	317.509	1.26543	0.170224	0.78924	0.980753	0	-10000000	0;18.8615;114.248;170.061;17.4025;0;190.243;0;0;0;0;0;
Z:\MS_data\7600_ZenoTof\2022\202210\20221012_MS_DC24_VACV_zenoSWATH_thermostability\20221010_MS_zenoSWATH_DC24_VACV_41C_r2-MS_DC24_VACV_zenoSWATH_41C_r2.mzML	20221010_MS_zenoSWATH_DC24_VACV_41C_r2-MS_DC24_VACV_zenoSWATH_41C_r2	41C_r2	Q9JKC8	Q9JKC8	AP3M1_MOUSE	Ap3m1	1110.13	522.96	522.96	1110.13	522.96	522.96	522.96	AAIKDNVVI	AAIKDNVVI	AAIKDNVVI2	2	0.0010543	0.158276	1	0.06125	0.0633147	1	0.0610063	0	1	1110.13	522.96	783.413	233.93	0.847125	20.6464	20.5659	20.7806	20.6033	20.5326	20.8714	AP-3 complex subunit mu-1	0.0409924	0.0595494	0.40119	331.489	1.32334	0.557928	0.564032	0.957468	0	-10000000	1110.13;0;460.417;0;52.5418;0;0;0;207.86;218.13;56.0708;0;
Z:\MS_data\7600_ZenoTof\2022\202210\20221012_MS_DC24_VACV_zenoSWATH_thermostability\20221010_MS_zenoSWATH_DC24_VACV_37C_r1-MS_DC24_VACV_zenoSWATH_37C_r1.mzML	20221010_MS_zenoSWATH_DC24_VACV_37C_r1-MS_DC24_VACV_zenoSWATH_37C_r1	37C_r1	Q99PL5	Q99PL5	RRBP1_MOUSE	Rrbp1	44108.3	16513.1	12543.1	44108.3	16513.1	12543.1	12543.1	AAIKLQELL	AAIKLQELL	AAIKLQELL2	2	0.000590319	0.00187823	0.00320256	0.00294985	0.00285714	0.00214592	0.00299401	0	1	1871.59	700.681	1367.89	1164.57	0.861152	32.4315	32.2704	32.5657	67.2243	32.4385	67.3771	Ribosome-binding protein 1	0.000750188	0.00096432	0.916143	1593.41	2.48268	0.420688	2.83854	0.999389	0	-10000000	1590.67;28.6612;519.907;0;535.785;163.985;708.584;0;0;0;271.904;0;
Z:\MS_data\7600_ZenoTof\2022\202210\20221012_MS_DC24_VACV_zenoSWATH_thermostability\20221010_MS_zenoSWATH_DC24_VACV_37C_r2-MS_DC24_VACV_zenoSWATH_37C_r2.mzML	20221010_MS_zenoSWATH_DC24_VACV_37C_r2-MS_DC24_VACV_zenoSWATH_37C_r2	37C_r2	Q99PL5	Q99PL5	RRBP1_MOUSE	Rrbp1	29478.5	15439.7	21288.2	29478.5	15439.7	21288.2	21288.2	AAIKLQELL	AAIKLQELL	AAIKLQELL2	2	0.000575374	0.00347868	0.00320256	0.00294985	0.00285714	0.00214592	0.00298507	0	1	1588.15	831.81	1158.47	566.459	0.869075	32.4034	32.3229	32.5377	67.2243	32.4125	67.3724	Ribosome-binding protein 1	0.000750188	0.00096432	0.802297	776.559	2.16937	0.648378	1.41973	0.999046	0	-10000000	1352.29;71.5307;695.328;62.9143;120.19;174.305;0;0;0;0;47.1546;0;
Z:\MS_data\7600_ZenoTof\2022\202210\20221012_MS_DC24_VACV_zenoSWATH_thermostability\20221010_MS_zenoSWATH_DC24_VACV_37C_r3-MS_DC24_VACV_zenoSWATH_37C_r3.mzML	20221010_MS_zenoSWATH_DC24_VACV_37C_r3-MS_DC24_VACV_zenoSWATH_37C_r3	37C_r3	Q99PL5	Q99PL5	RRBP1_MOUSE	Rrbp1	28689.1	13102.8	12937.9	28689.1	13102.8	12937.9	12937.9	AAIKLQELL	AAIKLQELL	AAIKLQELL2	2	0.000596659	0.000779803	0.00320256	0.00310559	0.003003	0.00214592	0.00314465	0	1	1569.07	716.618	1199.28	1022.55	0.83991	32.4304	32.2962	32.6182	67.2243	32.5009	67.3338	Ribosome-binding protein 1	0.000750188	0.00096432	0.903236	1337.84	2.45871	0.560921	2.15357	0.999775	0	-10000000	1315.69;375.781;566.074;266.949;326.92;87.1526;345.538;0;0;11.6152;354.173;0;
Z:\MS_data\7600_ZenoTof\2022\202210\20221012_MS_DC24_VACV_zenoSWATH_thermostability\20221010_MS_zenoSWATH_DC24_VACV_41C_r1-MS_DC24_VACV_zenoSWATH_41C_r1.mzML	20221010_MS_zenoSWATH_DC24_VACV_41C_r1-MS_DC24_VACV_zenoSWATH_41C_r1	41C_r1	Q99PL5	Q99PL5	RRBP1_MOUSE	Rrbp1	44399.4	18986	18982.3	44399.4	18986	18982.3	18982.3	AAIKLQELL	AAIKLQELL	AAIKLQELL2	2	0.000600601	0.00322219	0.00320256	0.00303951	0.00294118	0.00214592	0.00307692	0	1	1077.5	460.759	838.798	422.281	0.909782	32.4582	32.3778	32.5119	67.2243	32.5098	67.5234	Ribosome-binding protein 1	0.000750188	0.00096432	0.861117	542.451	2.80338	0.360964	1.34675	0.998908	0	-10000000	791.565;0;314.486;0;66.5059;0;0;0;0;0;0;0;
Z:\MS_data\7600_ZenoTof\2022\202210\20221012_MS_DC24_VACV_zenoSWATH_thermostability\20221010_MS_zenoSWATH_DC24_VACV_41C_r2-MS_DC24_VACV_zenoSWATH_41C_r2.mzML	20221010_MS_zenoSWATH_DC24_VACV_41C_r2-MS_DC24_VACV_zenoSWATH_41C_r2	41C_r2	Q99PL5	Q99PL5	RRBP1_MOUSE	Rrbp1	34457.2	16232.1	17920.9	34457.2	16232.1	17920.9	17920.9	AAIKLQELL	AAIKLQELL	AAIKLQELL2	2	0.00066313	0.00559846	0.00320256	0.00290698	0.0028169	0.00214592	0.00294985	0	1	354.486	166.991	250.159	387.907	0.33462	32.4305	32.3768	32.4842	67.2243	32.4573	67.3902	Ribosome-binding protein 1	0.000750188	0.00096432	0.830077	549.681	1.96383	0.160925	1.43567	0.998431	0	-10000000	1148.34;20.0874;395.27;0;0;76.8321;140.31;0;0;0;0;0;
Z:\MS_data\7600_ZenoTof\2022\202210\20221012_MS_DC24_VACV_zenoSWATH_thermostability\20221010_MS_zenoSWATH_DC24_VACV_41C_r3-MS_DC24_VACV_zenoSWATH_41C_r3.mzML	20221010_MS_zenoSWATH_DC24_VACV_41C_r3-MS_DC24_VACV_zenoSWATH_41C_r3	41C_r3	Q99PL5	Q99PL5	RRBP1_MOUSE	Rrbp1	25908.7	12760	13719.6	25908.7	12760	13719.6	13719.6	AAIKLQELL	AAIKLQELL	AAIKLQELL2	2	0.000596303	0.00692635	0.00320256	0.00284091	0.00275482	0.00214592	0.00288184	0	1	779.565	383.936	596.103	475.578	0.746025	32.4026	32.2953	32.5368	67.2243	32.4885	67.0873	Ribosome-binding protein 1	0.000750188	0.00096432	0.796295	621.946	1.63007	0.31801	1.41289	0.998159	0	-10000000	672.372;0;591.75;125.83;28.579;0;81.1015;0;0;0;0;0;
Z:\MS_data\7600_ZenoTof\2022\202210\20221012_MS_DC24_VACV_zenoSWATH_thermostability\20221010_MS_zenoSWATH_DC24_VACV_45C_r1-MS_DC24_VACV_zenoSWATH_45C_r1.mzML	20221010_MS_zenoSWATH_DC24_VACV_45C_r1-MS_DC24_VACV_zenoSWATH_45C_r1	45C_r1	Q99PL5	Q99PL5	RRBP1_MOUSE	Rrbp1	38052.7	14854.3	10968.7	38052.7	14854.3	10968.7	10968.7	AAIKLQELL	AAIKLQELL	AAIKLQELL2	2	0.00062461	0.0423237	0.00320256	0.00296736	0.00287356	0.00214592	0.00301205	0	1	500.005	195.183	385.867	232.381	0.772857	32.4302	32.3765	32.5107	67.2243	32.4515	67.3677	Ribosome-binding protein 1	0.000750188	0.00096432	0.657714	301.12	1.8511	0.0686421	1.65158	0.986077	0	-10000000	656.497;0;87.7097;0;266.024;0;254.351;0;0;48.54;0;0;
Z:\MS_data\7600_ZenoTof\2022\202210\20221012_MS_DC24_VACV_zenoSWATH_thermostability\20221010_MS_zenoSWATH_DC24_VACV_45C_r2-MS_DC24_VACV_zenoSWATH_45C_r2.mzML	20221010_MS_zenoSWATH_DC24_VACV_45C_r2-MS_DC24_VACV_zenoSWATH_45C_r2	45C_r2	Q99PL5	Q99PL5	RRBP1_MOUSE	Rrbp1	23912	15811	16068.7	23912	15811	16068.7	16068.7	AAIKLQELL	AAIKLQELL	AAIKLQELL2	2	0.000761615	0.0560339	0.00320256	0.00342466	0.00330033	0.00214592	0.00348432	0	1	599.19	396.194	495.492	440.244	0.810259	32.5112	32.3233	32.5648	67.2243	32.4706	67.8128	Ribosome-binding protein 1	0.000750188	0.00096432	0.825655	532.38	2.1649	0.0985273	0	0.987881	0	-10000000	599.19;71.5312;225.044;390.816;0;0;156.301;0;0;0;0;0;
Z:\MS_data\7600_ZenoTof\2022\202210\20221012_MS_DC24_VACV_zenoSWATH_thermostability\20221010_MS_zenoSWATH_DC24_VACV_45C_r3-MS_DC24_VACV_zenoSWATH_45C_r3.mzML	20221010_MS_zenoSWATH_DC24_VACV_45C_r3-MS_DC24_VACV_zenoSWATH_45C_r3	45C_r3	Q99PL5	Q99PL5	RRBP1_MOUSE	Rrbp1	40920.3	16771.1	16177.2	40920.3	16771.1	16177.2	16177.2	AAIKLQELL	AAIKLQELL	AAIKLQELL2	2	0.000587889	0.0386057	0.00320256	0.00304878	0.00294985	0.00214592	0.00308642	0	1	1265.66	518.729	970.152	574.261	0.854704	32.4845	32.2966	32.565	67.2243	32.4917	67.6078	Ribosome-binding protein 1	0.000750188	0.00096432	0.747185	749.182	1.64051	0.0657216	0.411249	0.988167	0	-10000000	1220.98;0;175.42;134.567;125.534;130.729;132.123;0;0;0;0;0;
Z:\MS_data\7600_ZenoTof\2022\202210\20221012_MS_DC24_VACV_zenoSWATH_thermostability\20221010_MS_zenoSWATH_DC24_VACV_49C_r2-MS_DC24_VACV_zenoSWATH_49C_r2.mzML	20221010_MS_zenoSWATH_DC24_VACV_49C_r2-MS_DC24_VACV_zenoSWATH_49C_r2	49C_r2	Q99PL5	Q99PL5	RRBP1_MOUSE	Rrbp1	27211.4	16272.2	14624.6	27211.4	16272.2	14624.6	14624.6	AAIKLQELL	AAIKLQELL	AAIKLQELL2	2	0.0152456	0.957202	0.00320256	0.00395257	0.00378788	0.00214592	0.00401606	0	1	98.6566	58.996	84.7031	118.83	0.681276	32.5379	32.4842	32.6453	67.2243	32.5226	67.5653	Ribosome-binding protein 1	0.000750188	0.00096432	0.294382	138.405	0.804166	0.0618431	0.591564	0.805053	0	-10000000	0;0;62.32;277.65;263.084;0;0;0;0;0;0;0;
Z:\MS_data\7600_ZenoTof\2022\202210\20221012_MS_DC24_VACV_zenoSWATH_thermostability\20221010_MS_zenoSWATH_DC24_VACV_37C_r1-MS_DC24_VACV_zenoSWATH_37C_r1.mzML	20221010_MS_zenoSWATH_DC24_VACV_37C_r1-MS_DC24_VACV_zenoSWATH_37C_r1	37C_r1	Q3KQJ0	Q3KQJ0	TMM69_MOUSE	Tmem69	808.616	302.728	302.728	808.616	302.728	302.728	302.728	AAILFSERL	AAILFSERL	AAILFSERL2	2	0.000590319	0.0391453	1	0.0599755	0.0607903	1	0.0596923	0	1	808.616	302.728	590.992	262.644	0.834935	30.2845	30.204	30.4187	57.5377	30.2018	57.8352	Transmembrane protein 69	0.0436006	0.0331998	0.0352116	359.359	1.16352	0.348485	0.500525	0.987408	0	-10000000	638.997;467.723;11.2881;1762.86;88.2126;27.2936;0;0;0;0;45.1664;0;
Z:\MS_data\7600_ZenoTof\2022\202210\20221012_MS_DC24_VACV_zenoSWATH_thermostability\20221010_MS_zenoSWATH_DC24_VACV_37C_r3-MS_DC24_VACV_zenoSWATH_37C_r3.mzML	20221010_MS_zenoSWATH_DC24_VACV_37C_r3-MS_DC24_VACV_zenoSWATH_37C_r3	37C_r3	Q3KQJ0	Q3KQJ0	TMM69_MOUSE	Tmem69	441.308	201.552	201.552	441.308	201.552	201.552	201.552	AAILFSERL	AAILFSERL	AAILFSERL2	2	0.00106045	0.182032	1	0.0611326	0.0607029	1	0.0608808	0	1	441.308	201.552	337.304	435.338	0.600245	30.2567	30.203	30.5251	57.5377	30.2069	57.7383	Transmembrane protein 69	0.0436006	0.0331998	0.511774	569.569	0.8203	0.351986	0	0.950099	0	-10000000	426.744;146.52;0;886.047;0;0;0;0;0;0;0;0;
Z:\MS_data\7600_ZenoTof\2022\202210\20221012_MS_DC24_VACV_zenoSWATH_thermostability\20221010_MS_zenoSWATH_DC24_VACV_41C_r1-MS_DC24_VACV_zenoSWATH_41C_r1.mzML	20221010_MS_zenoSWATH_DC24_VACV_41C_r1-MS_DC24_VACV_zenoSWATH_41C_r1	41C_r1	Q3KQJ0	Q3KQJ0	TMM69_MOUSE	Tmem69	420.997	180.026	180.026	420.997	180.026	180.026	180.026	AAILFSERL	AAILFSERL	AAILFSERL2	2	0.00552741	0.683069	1	0.0598504	0.0613003	1	0.0595985	0	1	420.997	180.026	327.733	85.7853	0.973616	30.2845	30.204	30.365	57.5377	30.1706	57.8375	Transmembrane protein 69	0.0436006	0.0331998	0.210169	110.198	1.06663	0.0058702	0.408333	0.811862	0	-10000000	420.997;443.078;0;221.733;0;80.1859;0;0;0;0;0;0;
Z:\MS_data\7600_ZenoTof\2022\202210\20221012_MS_DC24_VACV_zenoSWATH_thermostability\20221010_MS_zenoSWATH_DC24_VACV_41C_r3-MS_DC24_VACV_zenoSWATH_41C_r3.mzML	20221010_MS_zenoSWATH_DC24_VACV_41C_r3-MS_DC24_VACV_zenoSWATH_41C_r3	41C_r3	Q3KQJ0	Q3KQJ0	TMM69_MOUSE	Tmem69	534.415	263.199	263.199	534.415	263.199	263.199	263.199	AAILFSERL	AAILFSERL	AAILFSERL2	2	0.000596303	0.0786253	1	0.0640615	0.0642494	1	0.0644745	0	1	534.415	263.199	408.646	106.937	0.697617	30.229	30.1753	30.3363	57.5377	30.1862	57.7596	Transmembrane protein 69	0.0436006	0.0331998	0.230003	139.849	1.06165	0.258778	0.695466	0.979493	0	-10000000	615.999;528.124;16.7754;55.2128;0;0;0;0;0;0;118.255;0;
Z:\MS_data\7600_ZenoTof\2022\202210\20221012_MS_DC24_VACV_zenoSWATH_thermostability\20221010_MS_zenoSWATH_DC24_VACV_45C_r1-MS_DC24_VACV_zenoSWATH_45C_r1.mzML	20221010_MS_zenoSWATH_DC24_VACV_45C_r1-MS_DC24_VACV_zenoSWATH_45C_r1	45C_r1	Q3KQJ0	Q3KQJ0	TMM69_MOUSE	Tmem69	86.5427	33.783	0	86.5427	33.783			AAILFSERL	AAILFSERL	AAILFSERL2	2	0.0405286	1	1	0.0618892	0.0627426	1	0.061599	0	1	86.5427	33.783	66.7871	66.9411	0.829156	30.2298	30.1761	30.2835	57.5377	30.1822	57.7415	Transmembrane protein 69	0.0436006	0.0331998	0.227918	86.7421	0.972174	0.371062	0	0.556969	0	-10000000	66.9989;0;86.5427;646.924;0;0;0;0;0;0;0;0;
Z:\MS_data\7600_ZenoTof\2022\202210\20221012_MS_DC24_VACV_zenoSWATH_thermostability\20221010_MS_zenoSWATH_DC24_VACV_45C_r2-MS_DC24_VACV_zenoSWATH_45C_r2.mzML	20221010_MS_zenoSWATH_DC24_VACV_45C_r2-MS_DC24_VACV_zenoSWATH_45C_r2	45C_r2	Q3KQJ0	Q3KQJ0	TMM69_MOUSE	Tmem69	131.889	87.2073	87.2073	131.889	87.2073	87.2073	87.2073	AAILFSERL	AAILFSERL	AAILFSERL2	2	0.00503778	0.208074	1	0.0583153	0.0585714	1	0.0586957	0	1	131.889	87.2073	109.064	7.31939	0.801784	30.2838	30.2301	30.3375	57.5377	30.1762	57.9058	Transmembrane protein 69	0.0436006	0.0331998	0	8.85122	1.07325	0.3143	0	0.956429	0	-10000000	73.9996;77.1863;23.9872;363.615;0;0;0;0;0;0;0;0;
Z:\MS_data\7600_ZenoTof\2022\202210\20221012_MS_DC24_VACV_zenoSWATH_thermostability\20221010_MS_zenoSWATH_DC24_VACV_45C_r3-MS_DC24_VACV_zenoSWATH_45C_r3.mzML	20221010_MS_zenoSWATH_DC24_VACV_45C_r3-MS_DC24_VACV_zenoSWATH_45C_r3	45C_r3	Q3KQJ0	Q3KQJ0	TMM69_MOUSE	Tmem69	223.292	91.5156	91.5156	223.292	91.5156	91.5156	91.5156	AAILFSERL	AAILFSERL	AAILFSERL2	2	0.0022792	0.161682	1	0.0667539	0.0669266	1	0.0665349	0	1	223.292	91.5156	171.157	135.861	0.704712	30.3375	30.2839	30.3912	57.5377	30.2074	57.9724	Transmembrane protein 69	0.0436006	0.0331998	0.442078	177.244	1.24126	0.525657	0.187499	0.952246	0	-10000000	286.498;502.122;11.6017;84.029;0;0;0;0;0;0;0;0;
Z:\MS_data\7600_ZenoTof\2022\202210\20221012_MS_DC24_VACV_zenoSWATH_thermostability\20221010_MS_zenoSWATH_DC24_VACV_57C_r1-MS_DC24_VACV_zenoSWATH_57C_r1.mzML	20221010_MS_zenoSWATH_DC24_VACV_57C_r1-MS_DC24_VACV_zenoSWATH_57C_r1	57C_r1	Q3KQJ0	Q3KQJ0	TMM69_MOUSE	Tmem69	91.3366	135.183	0	91.3366	135.183			AAILFSERL	AAILFSERL	AAILFSERL2	2	0.02849	0.828379	1	0.0697674	0.0740038	1	0.0682261	0	1	91.3366	135.183	80.6913	418.736	0.801784	29.7736	29.7199	29.8273	57.5377	30.2019	55.901	Transmembrane protein 69	0.0436006	0.0331998	0.57803	473.979	1.68916	0.65614	1.1726	0.666264	1.16249	0.512489	0;80.166;14.8941;524.628;0;10.5411;0;0;47.2352;0;0;0;
Z:\MS_data\7600_ZenoTof\2022\202210\20221012_MS_DC24_VACV_zenoSWATH_thermostability\20221010_MS_zenoSWATH_DC24_VACV_41C_r1-MS_DC24_VACV_zenoSWATH_41C_r1.mzML	20221010_MS_zenoSWATH_DC24_VACV_41C_r1-MS_DC24_VACV_zenoSWATH_41C_r1	41C_r1	Q9CWU2	Q9CWU2	ZDH13_MOUSE	Zdhhc13	63.9477	27.3452	0	63.9477	27.3452			AAINNRLEL	AAINNRLEL	AAINNRLEL2	2	0.0283019	1	0.0106027	0.0339335	0.033677	0.016881	0.0341463	0	1	63.9477	27.3452	49.7813	320.831	0.452819	22.5006	22.3664	22.6616	28.0566	22.5175	27.9709	Palmitoyltransferase ZDHHC13	0.00441989	0.00704225	0	412.131	1.19796	0.0989643	1.08048	0.584261	0	-10000000	205.561;615.369;368.007;3698.86;0;60.3563;0;0;196.291;0;331.471;154.867;
Z:\MS_data\7600_ZenoTof\2022\202210\20221012_MS_DC24_VACV_zenoSWATH_thermostability\20221010_MS_zenoSWATH_DC24_VACV_41C_r2-MS_DC24_VACV_zenoSWATH_41C_r2.mzML	20221010_MS_zenoSWATH_DC24_VACV_41C_r2-MS_DC24_VACV_zenoSWATH_41C_r2	41C_r2	Q9CWU2	Q9CWU2	ZDH13_MOUSE	Zdhhc13	30.8451	14.5306	0	30.8451	14.5306			AAINNRLEL	AAINNRLEL	AAINNRLEL2	2	0.026121	1	0.0106027	0.035868	0.0362989	0.016881	0.0361011	0	1	30.8451	14.5306	21.7673	0	0.522264	22.5802	22.3923	22.6608	28.0566	22.5105	28.2632	Palmitoyltransferase ZDHHC13	0.00441989	0.00704225	0	0	1.08255	0.0682328	1.04723	0.626343	0	-10000000	798.509;0;0;1425.01;218.6;58.1062;42.3875;0;54.2458;0;338.263;135.077;
Z:\MS_data\7600_ZenoTof\2022\202210\20221012_MS_DC24_VACV_zenoSWATH_thermostability\20221010_MS_zenoSWATH_DC24_VACV_45C_r1-MS_DC24_VACV_zenoSWATH_45C_r1.mzML	20221010_MS_zenoSWATH_DC24_VACV_45C_r1-MS_DC24_VACV_zenoSWATH_45C_r1	45C_r1	Q9CWU2	Q9CWU2	ZDH13_MOUSE	Zdhhc13	227.227	88.7008	88.7009	227.227	88.7008	88.7009	88.7009	AAINNRLEL	AAINNRLEL	AAINNRLEL2	2	0.00494315	0.443706	0.0106027	0.0177215	0.0175585	0.016881	0.017842	0	1	227.227	88.7008	175.357	0	0.565209	22.5267	22.4193	22.5803	28.0566	22.5165	28.062	Palmitoyltransferase ZDHHC13	0.00441989	0.00704225	0	0	1.03858	0.11699	1.27739	0.871063	0	-10000000	161.858;131.865;71.8618;2217.1;0;372.369;19.0868;131.739;0;0;147.205;190.444;
Z:\MS_data\7600_ZenoTof\2022\202210\20221012_MS_DC24_VACV_zenoSWATH_thermostability\20221010_MS_zenoSWATH_DC24_VACV_45C_r3-MS_DC24_VACV_zenoSWATH_45C_r3.mzML	20221010_MS_zenoSWATH_DC24_VACV_45C_r3-MS_DC24_VACV_zenoSWATH_45C_r3	45C_r3	Q9CWU2	Q9CWU2	ZDH13_MOUSE	Zdhhc13	195.225	80.0124	0	195.225	80.0124			AAINNRLEL	AAINNRLEL	AAINNRLEL2	2	0.011369	1	0.0106027	0.0204248	0.0202429	0.016881	0.0205592	0	1	195.225	80.0124	149.643	0	0.292811	22.5536	22.5	22.6342	28.0566	22.5202	28.119	Palmitoyltransferase ZDHHC13	0.00441989	0.00704225	0	0	1.0926	0.113603	1.66804	0.715823	0	-10000000	609.937;269.805;0;591.017;0;87.1592;0;0;118.84;31.2763;507.087;0;
Z:\MS_data\7600_ZenoTof\2022\202210\20221012_MS_DC24_VACV_zenoSWATH_thermostability\20221010_MS_zenoSWATH_DC24_VACV_49C_r2-MS_DC24_VACV_zenoSWATH_49C_r2.mzML	20221010_MS_zenoSWATH_DC24_VACV_49C_r2-MS_DC24_VACV_zenoSWATH_49C_r2	49C_r2	Q9CWU2	Q9CWU2	ZDH13_MOUSE	Zdhhc13	408.963	244.557	244.557	408.963	244.557	244.557	244.557	AAINNRLEL	AAINNRLEL	AAINNRLEL2	2	0.00471698	0.23144	0.0106027	0.0185728	0.0183752	0.016881	0.0187192	0	1	408.963	244.557	351.121	256.29	0.952503	22.5535	22.473	22.634	28.0566	22.5357	28.1575	Palmitoyltransferase ZDHHC13	0.00441989	0.00704225	0.646158	298.51	1.70262	0.541629	0.406096	0.944688	0.677228	0.263189	408.963;264.306;0;863.387;0;0;0;0;0;0;166.353;0;
Z:\MS_data\7600_ZenoTof\2022\202210\20221012_MS_DC24_VACV_zenoSWATH_thermostability\20221010_MS_zenoSWATH_DC24_VACV_49C_r3-MS_DC24_VACV_zenoSWATH_49C_r3.mzML	20221010_MS_zenoSWATH_DC24_VACV_49C_r3-MS_DC24_VACV_zenoSWATH_49C_r3	49C_r3	Q9CWU2	Q9CWU2	ZDH13_MOUSE	Zdhhc13	142.516	110.057	110.057	142.516	110.057	110.057	110.057	AAINNRLEL	AAINNRLEL	AAINNRLEL2	2	0.00520446	0.42733	0.0106027	0.0191441	0.0189099	0.016881	0.0192963	0	1	142.516	110.057	112.895	281.032	0.896429	22.608	22.5543	22.6885	28.0566	22.5322	28.3182	Palmitoyltransferase ZDHHC13	0.00441989	0.00704225	0.832249	354.768	2.01512	0.15801	1.05096	0.911542	0	-10000000	132.994;0;73.6022;374.514;37.374;0;0;0;0;0;130.528;0;
Z:\MS_data\7600_ZenoTof\2022\202210\20221012_MS_DC24_VACV_zenoSWATH_thermostability\20221010_MS_zenoSWATH_DC24_VACV_53C_r1-MS_DC24_VACV_zenoSWATH_53C_r1.mzML	20221010_MS_zenoSWATH_DC24_VACV_53C_r1-MS_DC24_VACV_zenoSWATH_53C_r1	53C_r1	Q9CWU2	Q9CWU2	ZDH13_MOUSE	Zdhhc13	105.981	82.6154	82.6154	105.981	82.6154	82.6154	82.6154	AAINNRLEL	AAINNRLEL	AAINNRLEL2	2	0.000898473	0.275839	0.0106027	0.0283871	0.0279898	0.016881	0.0286458	0	1	105.981	82.6154	109.982	63.8798	0.801784	22.5274	22.4738	22.5811	28.0566	22.5379	28.0152	Palmitoyltransferase ZDHHC13	0.00441989	0.00704225	0	61.5555	1.69709	0.059728	1.17744	0.930143	0	-10000000	121.393;0;65.1477;1620.27;161.328;14.9356;0;0;0;0;103.971;94.7459;
Z:\MS_data\7600_ZenoTof\2022\202210\20221012_MS_DC24_VACV_zenoSWATH_thermostability\20221010_MS_zenoSWATH_DC24_VACV_53C_r2-MS_DC24_VACV_zenoSWATH_53C_r2.mzML	20221010_MS_zenoSWATH_DC24_VACV_53C_r2-MS_DC24_VACV_zenoSWATH_53C_r2	53C_r2	Q9CWU2	Q9CWU2	ZDH13_MOUSE	Zdhhc13	0	0	0					AAINNRLEL	AAINNRLEL	AAINNRLEL2	2	0.0447309	1	0.0106027	0.0521945	0.0515222	0.016881	0.052506	0	1	0	0	0	205.463	0	22.6072	22.5535	22.6609	28.0566	22.514	28.4349	Palmitoyltransferase ZDHHC13	0.00441989	0.00704225	0.537596	269.167	1.11282	0.524775	1.15944	0.754044	0	-10000000	26.4368;0;22.3793;499.348;0;0;0;0;42.0165;0;58.0591;54.0319;
Z:\MS_data\7600_ZenoTof\2022\202210\20221012_MS_DC24_VACV_zenoSWATH_thermostability\20221010_MS_zenoSWATH_DC24_VACV_37C_r1-MS_DC24_VACV_zenoSWATH_37C_r1.mzML	20221010_MS_zenoSWATH_DC24_VACV_37C_r1-MS_DC24_VACV_zenoSWATH_37C_r1	37C_r1	F6ZDS4	F6ZDS4	TPR_MOUSE	Tpr	6047.99	2264.23	1595.91	6047.99	2264.23	1595.91	1595.91	AAIPADMAAVL	AAIPADMAAVL	AAIPADMAAVL2	2	0.0205365	1	0.129255	0.00294985	0.00285714	0.00214592	0.00299401	0	1	173.86	65.0892	127.069	46.7716	0.674554	38.9281	38.8744	38.9818	92.3896	38.9955	92.123	Nucleoprotein TPR	0.00979083	0.00096432	0.0138611	63.9945	1.02517	0.283295	1.36965	0.572362	0	-10000000	0;133.892;356.332;105.199;82.4619;0;113.563;220.072;0;0;0;0;
Z:\MS_data\7600_ZenoTof\2022\202210\20221012_MS_DC24_VACV_zenoSWATH_thermostability\20221010_MS_zenoSWATH_DC24_VACV_37C_r2-MS_DC24_VACV_zenoSWATH_37C_r2.mzML	20221010_MS_zenoSWATH_DC24_VACV_37C_r2-MS_DC24_VACV_zenoSWATH_37C_r2	37C_r2	F6ZDS4	F6ZDS4	TPR_MOUSE	Tpr	2719.58	1424.41	1266.5	2719.58	1424.41	1266.5	1266.5	AAIPADMAAVL	AAIPADMAAVL	AAIPADMAAVL2	2	0.0244541	1	0.129255	0.00507614	0.00493827	0.00214592	0.00512821	0	1	195.999	102.657	142.971	173.012	0.801784	38.9	38.8463	38.9537	92.3896	38.9861	92.059	Nucleoprotein TPR	0.00979083	0.00096432	0.195854	237.182	1.33978	0.0837539	1.23569	0.69775	0	-10000000	21.7773;122.421;0;93.1276;137.162;0;0;0;262.891;0;0;0;
Z:\MS_data\7600_ZenoTof\2022\202210\20221012_MS_DC24_VACV_zenoSWATH_thermostability\20221010_MS_zenoSWATH_DC24_VACV_37C_r3-MS_DC24_VACV_zenoSWATH_37C_r3.mzML	20221010_MS_zenoSWATH_DC24_VACV_37C_r3-MS_DC24_VACV_zenoSWATH_37C_r3	37C_r3	F6ZDS4	F6ZDS4	TPR_MOUSE	Tpr	4205.36	1920.65	2691.61	4205.36	1920.65	2691.61	2691.61	AAIPADMAAVL	AAIPADMAAVL	AAIPADMAAVL2	2	0.00899621	0.768472	0.129255	0.00310559	0.003003	0.00214592	0.00314465	0	1	338.759	154.717	258.923	31.1264	0.801784	38.8728	38.8191	38.9265	92.3896	38.9955	91.8857	Nucleoprotein TPR	0.00979083	0.00096432	0.17441	40.7238	1.29259	0.185561	0	0.818512	0	-10000000	226.155;401.675;150.139;0;0;0;144.32;0;0;0;0;85.9506;
Z:\MS_data\7600_ZenoTof\2022\202210\20221012_MS_DC24_VACV_zenoSWATH_thermostability\20221010_MS_zenoSWATH_DC24_VACV_41C_r2-MS_DC24_VACV_zenoSWATH_41C_r2.mzML	20221010_MS_zenoSWATH_DC24_VACV_41C_r2-MS_DC24_VACV_zenoSWATH_41C_r2	41C_r2	F6ZDS4	F6ZDS4	TPR_MOUSE	Tpr	7165.77	3375.65	2744.8	7165.77	3375.65	2744.8	2744.8	AAIPADMAAVL	AAIPADMAAVL	AAIPADMAAVL2	2	0.0339056	1	0.129255	0.00290698	0.0028169	0.00214592	0.00294985	0	1	128.752	60.6527	90.8599	142.273	0.703981	38.9268	38.8732	38.9805	92.3896	38.9772	92.1966	Nucleoprotein TPR	0.00979083	0.00096432	0.195012	201.606	1.08035	0.114048	1.72266	0.562969	0	-10000000	188.459;0;0;0;81.6379;0;0;280.515;80.3953;0;0;0;
Z:\MS_data\7600_ZenoTof\2022\202210\20221012_MS_DC24_VACV_zenoSWATH_thermostability\20221010_MS_zenoSWATH_DC24_VACV_41C_r3-MS_DC24_VACV_zenoSWATH_41C_r3.mzML	20221010_MS_zenoSWATH_DC24_VACV_41C_r3-MS_DC24_VACV_zenoSWATH_41C_r3	41C_r3	F6ZDS4	F6ZDS4	TPR_MOUSE	Tpr	6491.38	3197	2842.59	6491.38	3197	2842.59	2842.59	AAIPADMAAVL	AAIPADMAAVL	AAIPADMAAVL2	2	0.0136924	0.982368	0.129255	0.00284091	0.00275482	0.00214592	0.00288184	0	1	101.364	49.9219	77.5093	43.8013	0.656781	38.8988	38.8451	39.0062	92.3896	39.0132	91.9732	Nucleoprotein TPR	0.00979083	0.00096432	0	57.282	0.803215	0.0765363	1.71502	0.792654	0	-10000000	318.571;410.471;0;0;288.615;0;34.0097;0;107.948;0;0;0;
Z:\MS_data\7600_ZenoTof\2022\202210\20221012_MS_DC24_VACV_zenoSWATH_thermostability\20221010_MS_zenoSWATH_DC24_VACV_45C_r2-MS_DC24_VACV_zenoSWATH_45C_r2.mzML	20221010_MS_zenoSWATH_DC24_VACV_45C_r2-MS_DC24_VACV_zenoSWATH_45C_r2	45C_r2	F6ZDS4	F6ZDS4	TPR_MOUSE	Tpr	2118.04	1400.48	1683.44	2118.04	1400.48	1683.44	1683.44	AAIPADMAAVL	AAIPADMAAVL	AAIPADMAAVL2	2	0.0152151	1	0.129255	0.00342466	0.00330033	0.00214592	0.00348432	0	1	28.5319	18.8657	23.594	32.1957	0.801784	38.9273	38.8736	38.981	92.3896	39.0128	92.0679	Nucleoprotein TPR	0.00979083	0.00096432	0	38.9338	1.06741	0.48308	0	0.812523	0	-10000000	0;80.0142;38.0425;0;0;0;89.9042;0;0;0;0;407.957;
Z:\MS_data\7600_ZenoTof\2022\202210\20221012_MS_DC24_VACV_zenoSWATH_thermostability\20221010_MS_zenoSWATH_DC24_VACV_45C_r3-MS_DC24_VACV_zenoSWATH_45C_r3.mzML	20221010_MS_zenoSWATH_DC24_VACV_45C_r3-MS_DC24_VACV_zenoSWATH_45C_r3	45C_r3	F6ZDS4	F6ZDS4	TPR_MOUSE	Tpr	8194.19	3358.37	2852.83	8194.19	3358.37	2852.83	2852.83	AAIPADMAAVL	AAIPADMAAVL	AAIPADMAAVL2	2	0.000587889	0.0408722	0.129255	0.00304878	0.00294985	0.00214592	0.00308642	0	1	234.787	96.2267	179.968	118.001	0.801784	38.9543	38.9007	39.008	92.3896	38.9865	92.2618	Nucleoprotein TPR	0.00979083	0.00096432	0.56671	153.944	2.17447	0.198635	2.38058	0.987481	0	-10000000	99.6745;189.633;0;16.9322;147.332;0;561.019;0;0;77.3215;0;0;
Z:\MS_data\7600_ZenoTof\2022\202210\20221012_MS_DC24_VACV_zenoSWATH_thermostability\20221010_MS_zenoSWATH_DC24_VACV_53C_r1-MS_DC24_VACV_zenoSWATH_53C_r1.mzML	20221010_MS_zenoSWATH_DC24_VACV_53C_r1-MS_DC24_VACV_zenoSWATH_53C_r1	53C_r1	F6ZDS4	F6ZDS4	TPR_MOUSE	Tpr	0	0	0					AAIPADMAAVL	AAIPADMAAVL	AAIPADMAAVL2	2	0.0329835	1	0.129255	0.0178838	0.0175953	0.00214592	0.0180451	0	1	0	0	0	12.0747	0	38.9817	38.928	39.0353	92.3896	39.0071	92.3046	Nucleoprotein TPR	0.00979083	0.00096432	0	11.6353	1.07483	0.077272	0	0.677502	0	-10000000	81.5276;118.422;112.603;0;0;132.848;0;0;133.992;0;0;0;
Z:\MS_data\7600_ZenoTof\2022\202210\20221012_MS_DC24_VACV_zenoSWATH_thermostability\20221010_MS_zenoSWATH_DC24_VACV_41C_r2-MS_DC24_VACV_zenoSWATH_41C_r2.mzML	20221010_MS_zenoSWATH_DC24_VACV_41C_r2-MS_DC24_VACV_zenoSWATH_41C_r2	41C_r2	Q5SPL2	Q5SPL2	PHF12_MOUSE	Phf12	222.558	104.843	104.843	222.558	104.843	104.843	104.843	AAIRDGELI	AAIRDGELI	AAIRDGELI2	2	0.00449102	0.402475	1	0.0654613	0.0674923	1	0.0652447	0	1	222.558	104.843	157.058	0	0.649037	20.9152	20.8615	20.9688	21.7535	20.8863	21.8238	PHD finger protein 12	0.0431526	0.00174825	0	0	1.06741	0.629245	0	0.898506	0	-10000000	322.591;159.669;0;0;0;0;0;0;0;0;0;0;
Z:\MS_data\7600_ZenoTof\2022\202210\20221012_MS_DC24_VACV_zenoSWATH_thermostability\20221010_MS_zenoSWATH_DC24_VACV_41C_r3-MS_DC24_VACV_zenoSWATH_41C_r3.mzML	20221010_MS_zenoSWATH_DC24_VACV_41C_r3-MS_DC24_VACV_zenoSWATH_41C_r3	41C_r3	Q5SPL2	Q5SPL2	PHF12_MOUSE	Phf12	241.477	118.927	118.927	241.477	118.927	118.927	118.927	AAIRDGELI	AAIRDGELI	AAIRDGELI2	2	0.000596303	0.0151305	1	0.0688336	0.0696203	1	0.0692752	0	1	241.477	118.927	184.648	89.3697	0.753038	20.9148	20.8612	20.9685	21.7535	20.9361	21.7004	PHD finger protein 12	0.0431526	0.00174825	0.1113	116.875	1.66055	0.204307	1.59512	0.995987	0	-10000000	154.885;132.635;83.9179;0;0;0;0;0;0;0;0;0;
Z:\MS_data\7600_ZenoTof\2022\202210\20221012_MS_DC24_VACV_zenoSWATH_thermostability\20221010_MS_zenoSWATH_DC24_VACV_45C_r1-MS_DC24_VACV_zenoSWATH_45C_r1.mzML	20221010_MS_zenoSWATH_DC24_VACV_45C_r1-MS_DC24_VACV_zenoSWATH_45C_r1	45C_r1	Q5SPL2	Q5SPL2	PHF12_MOUSE	Phf12	214.651	83.7917	83.7917	214.651	83.7917	83.7917	83.7917	AAIRDGELI	AAIRDGELI	AAIRDGELI2	2	0.00218341	0.194465	1	0.0659411	0.0668364	1	0.0650354	0	1	214.651	83.7917	165.652	32.6028	0.801784	20.8884	20.8347	20.9421	21.7535	20.9368	21.5954	PHD finger protein 12	0.0431526	0.00174825	0.244643	42.2467	1.31205	0.620714	0	0.939078	0	-10000000	56.2503;211.201;0;0;0;0;0;0;0;141.466;0;0;
Z:\MS_data\7600_ZenoTof\2022\202210\20221012_MS_DC24_VACV_zenoSWATH_thermostability\20221010_MS_zenoSWATH_DC24_VACV_45C_r3-MS_DC24_VACV_zenoSWATH_45C_r3.mzML	20221010_MS_zenoSWATH_DC24_VACV_45C_r3-MS_DC24_VACV_zenoSWATH_45C_r3	45C_r3	Q5SPL2	Q5SPL2	PHF12_MOUSE	Phf12	265.098	108.65	0	265.098	108.65			AAIRDGELI	AAIRDGELI	AAIRDGELI2	2	0.042077	1	1	0.0696615	0.0711054	1	0.0694626	0	1	265.098	108.65	203.202	0	0.801784	21.5864	21.5327	21.6401	21.7535	20.969	24.5442	PHD finger protein 12	0.0431526	0.00174825	0	0	1.06741	0.546322	0	0.48008	0	-10000000	170.058;126.72;0;0;0;0;0;0;23.2705;0;0;0;
Z:\MS_data\7600_ZenoTof\2022\202210\20221012_MS_DC24_VACV_zenoSWATH_thermostability\20221010_MS_zenoSWATH_DC24_VACV_37C_r1-MS_DC24_VACV_zenoSWATH_37C_r1.mzML	20221010_MS_zenoSWATH_DC24_VACV_37C_r1-MS_DC24_VACV_zenoSWATH_37C_r1	37C_r1	P04305	P04305	D5_VACCW	VACWR110	50197.1	18792.7	14828.8	50197.1	18792.7	14828.8	14828.8	AAIRGNDVI	AAIRGNDVI	AAIRGNDVI2	2	0.000346949	0.000346949	0.00320256	0.00294985	0.00285714	0.0116525	0.00299401	0	1	50197.1	18792.7	36687.5	6519.44	0.963702	16.3253	16.1374	16.4326	4.59267	16.2371	4.93214	Primase D5	0.000666005	0.00096432	0.989224	8920.13	4.66562	0.0750437	4.34116	0.999887	0	-10000000	26227.8;20610.4;3358.91;207.248;917.788;372.328;2189.33;0;61.1147;388.653;0;0;
Z:\MS_data\7600_ZenoTof\2022\202210\20221012_MS_DC24_VACV_zenoSWATH_thermostability\20221010_MS_zenoSWATH_DC24_VACV_37C_r2-MS_DC24_VACV_zenoSWATH_37C_r2.mzML	20221010_MS_zenoSWATH_DC24_VACV_37C_r2-MS_DC24_VACV_zenoSWATH_37C_r2	37C_r2	P04305	P04305	D5_VACCW	VACWR110	25723.2	13472.8	13441.7	25723.2	13472.8	13441.7	13441.7	AAIRGNDVI	AAIRGNDVI	AAIRGNDVI2	2	0.000145446	0.000145446	0.00320256	0.00294985	0.00285714	0.0116525	0.00298507	0	1	25723.2	13472.8	18763.7	5576.8	0.629438	16.2442	16.1369	16.3516	4.59267	16.1973	4.77184	Primase D5	0.000666005	0.00096432	0.843398	7645.23	4.08391	0.108259	5.14042	0.99996	0	-10000000	18766.6;16140.5;3314.94;419.226;613.689;301.323;2149.6;44.748;159.15;31.0111;0;53.3051;
Z:\MS_data\7600_ZenoTof\2022\202210\20221012_MS_DC24_VACV_zenoSWATH_thermostability\20221010_MS_zenoSWATH_DC24_VACV_37C_r3-MS_DC24_VACV_zenoSWATH_37C_r3.mzML	20221010_MS_zenoSWATH_DC24_VACV_37C_r3-MS_DC24_VACV_zenoSWATH_37C_r3	37C_r3	P04305	P04305	D5_VACCW	VACWR110	35056.2	16010.7	15973.8	35056.2	16010.7	15973.8	15973.8	AAIRGNDVI	AAIRGNDVI	AAIRGNDVI2	2	0.000120646	0.000120646	0.00320256	0.00310559	0.003003	0.0116525	0.00314465	0	1	35056.2	16010.7	26794.4	4766.22	0.96845	16.3249	16.1639	16.4591	4.59267	16.2579	4.86389	Primase D5	0.000666005	0.00096432	0.977001	6235.83	4.40749	0.121191	4.49179	0.999965	0	-10000000	16590.5;15359.6;3111.25;389.42;985.368;133.457;2145.48;0;366.687;288.251;0;18.9704;
Z:\MS_data\7600_ZenoTof\2022\202210\20221012_MS_DC24_VACV_zenoSWATH_thermostability\20221010_MS_zenoSWATH_DC24_VACV_41C_r1-MS_DC24_VACV_zenoSWATH_41C_r1.mzML	20221010_MS_zenoSWATH_DC24_VACV_41C_r1-MS_DC24_VACV_zenoSWATH_41C_r1	41C_r1	P04305	P04305	D5_VACCW	VACWR110	19452.3	8318.17	8298.99	19452.3	8318.17	8298.99	8298.99	AAIRGNDVI	AAIRGNDVI	AAIRGNDVI2	2	0.000169201	0.000169201	0.00320256	0.00657174	0.00650054	0.0116525	0.00662252	0	1	19452.3	8318.17	15143	5944.84	0.628098	16.3524	16.2451	16.433	4.59267	16.2267	5.07447	Primase D5	0.000666005	0.00096432	0.904423	7636.59	4.16555	0.10261	4.48041	0.999943	0	-10000000	21744.3;14872;2760.65;273.257;649.679;958.857;2032.55;0;0;360.693;0;0;
Z:\MS_data\7600_ZenoTof\2022\202210\20221012_MS_DC24_VACV_zenoSWATH_thermostability\20221010_MS_zenoSWATH_DC24_VACV_41C_r2-MS_DC24_VACV_zenoSWATH_41C_r2.mzML	20221010_MS_zenoSWATH_DC24_VACV_41C_r2-MS_DC24_VACV_zenoSWATH_41C_r2	41C_r2	P04305	P04305	D5_VACCW	VACWR110	59147.6	27863.3	19464.2	59147.6	27863.3	19464.2	19464.2	AAIRGNDVI	AAIRGNDVI	AAIRGNDVI2	2	0.00066313	0.00120435	0.00320256	0.00290698	0.0028169	0.0116525	0.00294985	0	1	59147.6	27863.3	41740.2	8133.73	0.968552	16.3248	16.1369	16.4322	4.59267	16.2174	4.99552	Primase D5	0.000666005	0.00096432	0.991695	11525.8	4.96357	0.101917	4.70572	0.999662	0	-10000000	29423.7;24761.8;5536.87;611.1;923.009;791.992;2961.25;0;79.3636;112.859;0;84.3474;
Z:\MS_data\7600_ZenoTof\2022\202210\20221012_MS_DC24_VACV_zenoSWATH_thermostability\20221010_MS_zenoSWATH_DC24_VACV_41C_r3-MS_DC24_VACV_zenoSWATH_41C_r3.mzML	20221010_MS_zenoSWATH_DC24_VACV_41C_r3-MS_DC24_VACV_zenoSWATH_41C_r3	41C_r3	P04305	P04305	D5_VACCW	VACWR110	27680.5	13632.6	13601.2	27680.5	13632.6	13601.2	13601.2	AAIRGNDVI	AAIRGNDVI	AAIRGNDVI2	2	1.4326e-05	1.4326e-05	0.00320256	0.00682594	0.00674916	0.0116525	0.00688073	0	1	27680.5	13632.6	21166.2	5631.56	0.802439	16.2441	16.1904	16.4588	4.59267	16.2413	4.59657	Primase D5	0.000666005	0.00096432	0.918227	7364.78	3.86187	0.0740521	4.11854	0.999996	0	-10000000	17586.1;14868.9;2733.53;540.361;550.782;180.396;1822.15;0;0;36.0948;0;0;
Z:\MS_data\7600_ZenoTof\2022\202210\20221012_MS_DC24_VACV_zenoSWATH_thermostability\20221010_MS_zenoSWATH_DC24_VACV_45C_r1-MS_DC24_VACV_zenoSWATH_45C_r1.mzML	20221010_MS_zenoSWATH_DC24_VACV_45C_r1-MS_DC24_VACV_zenoSWATH_45C_r1	45C_r1	P04305	P04305	D5_VACCW	VACWR110	33619	13123.6	11360.2	33619	13123.6	11360.2	11360.2	AAIRGNDVI	AAIRGNDVI	AAIRGNDVI2	2	0.000443519	0.000443519	0.00320256	0.00296736	0.00287356	0.0116525	0.00301205	0	1	33619	13123.6	25944.6	5772.91	0.822561	16.2712	16.1906	16.4322	4.59267	16.2454	4.68125	Primase D5	0.000666005	0.00096432	0.8559	7480.53	4.46504	0.159893	5.46895	0.999852	0	-10000000	21086.5;19994.9;4269.66;422.542;1088.38;305.698;2296.79;0;140.478;415.344;0;18.1865;
Z:\MS_data\7600_ZenoTof\2022\202210\20221012_MS_DC24_VACV_zenoSWATH_thermostability\20221010_MS_zenoSWATH_DC24_VACV_45C_r2-MS_DC24_VACV_zenoSWATH_45C_r2.mzML	20221010_MS_zenoSWATH_DC24_VACV_45C_r2-MS_DC24_VACV_zenoSWATH_45C_r2	45C_r2	P04305	P04305	D5_VACCW	VACWR110	24472.5	16181.6	16144.3	24472.5	16181.6	16144.3	16144.3	AAIRGNDVI	AAIRGNDVI	AAIRGNDVI2	2	0.000218348	0.000218348	0.00320256	0.00764331	0.00754717	0.0116525	0.00771208	0	1	24472.5	16181.6	20237.1	4223.24	0.963763	16.3251	16.1641	16.4593	4.59267	16.2449	4.91332	Primase D5	0.000666005	0.00096432	0.977851	5107.1	4.12518	0.117211	3.22075	0.999952	0	-10000000	12751.1;10914.4;1671.67;239.897;220.313;135.646;1028.12;0;0;75.2398;0;0;
Z:\MS_data\7600_ZenoTof\2022\202210\20221012_MS_DC24_VACV_zenoSWATH_thermostability\20221010_MS_zenoSWATH_DC24_VACV_45C_r3-MS_DC24_VACV_zenoSWATH_45C_r3.mzML	20221010_MS_zenoSWATH_DC24_VACV_45C_r3-MS_DC24_VACV_zenoSWATH_45C_r3	45C_r3	P04305	P04305	D5_VACCW	VACWR110	34371.9	14087.2	10137.4	34371.9	14087.2	10137.4	10137.4	AAIRGNDVI	AAIRGNDVI	AAIRGNDVI2	2	0.000587889	0.00064331	0.00320256	0.00304878	0.00294985	0.0116525	0.00308642	0	1	34371.9	14087.2	26346.6	5804.85	0.955442	16.3251	16.1373	16.4593	4.59267	16.2604	4.8568	Primase D5	0.000666005	0.00096432	0.985971	7573.02	4.65077	0.119549	3.87713	0.999801	0	-10000000	17054.7;14818.1;3029.74;579.402;673.573;641.228;1913.36;0;366.695;434.408;0;0;
Z:\MS_data\7600_ZenoTof\2022\202210\20221012_MS_DC24_VACV_zenoSWATH_thermostability\20221010_MS_zenoSWATH_DC24_VACV_49C_r1-MS_DC24_VACV_zenoSWATH_49C_r1.mzML	20221010_MS_zenoSWATH_DC24_VACV_49C_r1-MS_DC24_VACV_zenoSWATH_49C_r1	49C_r1	P04305	P04305	D5_VACCW	VACWR110	3879.37	2891.3	5788.35	3879.37	2891.3	5788.35	5788.35	AAIRGNDVI	AAIRGNDVI	AAIRGNDVI2	2	0.000897666	0.00168361	0.00320256	0.00505051	0.00478469	0.0116525	0.00512821	0	1	3879.37	2891.3	3043.54	1424.99	0.736588	16.2188	16.1651	16.4066	4.59267	16.2376	4.50028	Primase D5	0.000666005	0.00096432	0.792268	1816.33	3.03029	0.175351	2.93106	0.999536	0	-10000000	4629.52;3700.02;531.943;53.4679;491.997;0;192.589;0;91.6709;0;0;0;
Z:\MS_data\7600_ZenoTof\2022\202210\20221012_MS_DC24_VACV_zenoSWATH_thermostability\20221010_MS_zenoSWATH_DC24_VACV_49C_r2-MS_DC24_VACV_zenoSWATH_49C_r2.mzML	20221010_MS_zenoSWATH_DC24_VACV_49C_r2-MS_DC24_VACV_zenoSWATH_49C_r2	49C_r2	P04305	P04305	D5_VACCW	VACWR110	20517.2	12269.2	11186.9	20517.2	12269.2	11186.9	11186.9	AAIRGNDVI	AAIRGNDVI	AAIRGNDVI2	2	0.000857633	0.000872885	0.00320256	0.00395257	0.00378788	0.0116525	0.00401606	0	1	20517.2	12269.2	17615.4	4502.8	0.778678	16.298	16.2175	16.4053	4.59267	16.2586	4.73534	Primase D5	0.000666005	0.00096432	0.882445	5244.57	3.80819	0.217321	2.95311	0.999779	0	-10000000	13965.6;13187.3;2568.13;294.548;527.707;0;1889.67;0;0;80.5777;0;0;
Z:\MS_data\7600_ZenoTof\2022\202210\20221012_MS_DC24_VACV_zenoSWATH_thermostability\20221010_MS_zenoSWATH_DC24_VACV_49C_r3-MS_DC24_VACV_zenoSWATH_49C_r3.mzML	20221010_MS_zenoSWATH_DC24_VACV_49C_r3-MS_DC24_VACV_zenoSWATH_49C_r3	49C_r3	P04305	P04305	D5_VACCW	VACWR110	12938.3	9991.51	7906.62	12938.3	9991.51	7906.62	7906.62	AAIRGNDVI	AAIRGNDVI	AAIRGNDVI2	2	0.000940734	0.00834402	0.00320256	0.00446429	0.00425532	0.0116525	0.00454545	0	1	12938.3	9991.51	10249.2	2445.21	0.837024	16.2985	16.1106	16.4595	4.59267	16.2611	4.74713	Primase D5	0.000666005	0.00096432	0.904199	3086.77	3.40805	0.108632	2.6217	0.998109	0	-10000000	8409.69;6936.69;1012.96;198.732;204.93;0;913.818;0;0;75.2394;0;0;
Z:\MS_data\7600_ZenoTof\2022\202210\20221012_MS_DC24_VACV_zenoSWATH_thermostability\20221010_MS_zenoSWATH_DC24_VACV_53C_r1-MS_DC24_VACV_zenoSWATH_53C_r1.mzML	20221010_MS_zenoSWATH_DC24_VACV_53C_r1-MS_DC24_VACV_zenoSWATH_53C_r1	53C_r1	P04305	P04305	D5_VACCW	VACWR110	4102.21	3197.81	5539.54	4102.21	3197.81	5539.54	5539.54	AAIRGNDVI	AAIRGNDVI	AAIRGNDVI2	2	0.000898473	0.00349592	0.00320256	0.00581395	0.00546448	0.0116525	0.00595238	0	1	4102.21	3197.81	4257.11	1260.34	0.888026	16.3523	16.1913	16.4329	4.59267	16.2575	4.92909	Primase D5	0.000666005	0.00096432	0.906035	1214.48	2.85998	0.348169	1.40172	0.999049	0	-10000000	3154.76;2597.7;552.279;0;82.4118;0;176.148;0;24.828;0;0;0;
Z:\MS_data\7600_ZenoTof\2022\202210\20221012_MS_DC24_VACV_zenoSWATH_thermostability\20221010_MS_zenoSWATH_DC24_VACV_53C_r2-MS_DC24_VACV_zenoSWATH_53C_r2.mzML	20221010_MS_zenoSWATH_DC24_VACV_53C_r2-MS_DC24_VACV_zenoSWATH_53C_r2	53C_r2	P04305	P04305	D5_VACCW	VACWR110	10213.9	8206.42	9737.64	10213.9	8206.42	9737.64	9737.64	AAIRGNDVI	AAIRGNDVI	AAIRGNDVI2	2	0.00102775	0.00337365	0.00320256	0.0052356	0.00495049	0.0116525	0.00534759	0	1	10213.9	8206.42	7796.55	2057.69	0.916668	16.3517	16.137	16.4591	4.59267	16.2668	4.93401	Primase D5	0.000666005	0.00096432	0.970982	2695.68	2.86793	0.343873	1.84874	0.999033	0	-10000000	7630.78;4680.9;810.372;0;0;18.2984;342.706;0;72.7855;136.247;0;0;
Z:\MS_data\7600_ZenoTof\2022\202210\20221012_MS_DC24_VACV_zenoSWATH_thermostability\20221010_MS_zenoSWATH_DC24_VACV_53C_r3-MS_DC24_VACV_zenoSWATH_53C_r3.mzML	20221010_MS_zenoSWATH_DC24_VACV_53C_r3-MS_DC24_VACV_zenoSWATH_53C_r3	53C_r3	P04305	P04305	D5_VACCW	VACWR110	2422.48	3604.45	3596.14	2422.48	3604.45	3596.14	3596.14	AAIRGNDVI	AAIRGNDVI	AAIRGNDVI2	2	0.00117509	0.00531117	0.00320256	0.0111524	0.0109489	0.0116525	0.011257	0	1	2422.48	3604.45	2704.65	1844.46	0.378484	16.2444	16.1639	16.3786	4.59267	16.2375	4.63266	Primase D5	0.000666005	0.00096432	0.577512	1652.04	1.73735	0.218036	0	0.99882	0	-10000000	3541.26;2358.98;177.498;63.4051;0;0;261.09;0;30.7692;0;0;0;
Z:\MS_data\7600_ZenoTof\2022\202210\20221012_MS_DC24_VACV_zenoSWATH_thermostability\20221010_MS_zenoSWATH_DC24_VACV_37C_r1-MS_DC24_VACV_zenoSWATH_37C_r1.mzML	20221010_MS_zenoSWATH_DC24_VACV_37C_r1-MS_DC24_VACV_zenoSWATH_37C_r1	37C_r1	Q9WU20	Q9WU20	MTHR_MOUSE	Mthfr	8221.67	3078.01	3078.01	8221.67	3078.01	3078.01	3078.01	AAIRNYGIEL	AAIRNYGIEL	AAIRNYGIEL2	2	0.000590319	0.00254428	0.00223214	0.00535332	0.00529101	0.00401606	0.00539374	0	1	8221.67	3078.01	6008.96	2157.14	0.888775	27.1196	26.9854	27.2806	45.4941	27.1769	45.2005	Methylenetetrahydrofolate reductase	0.000750188	0.00096432	0.94623	2951.47	2.95847	0.592345	2.90398	0.999172	0	-10000000	5615.17;1542.28;1804.77;270.052;0;261.581;557.94;170.452;120.363;914.689;0;50.9583;
Z:\MS_data\7600_ZenoTof\2022\202210\20221012_MS_DC24_VACV_zenoSWATH_thermostability\20221010_MS_zenoSWATH_DC24_VACV_37C_r2-MS_DC24_VACV_zenoSWATH_37C_r2.mzML	20221010_MS_zenoSWATH_DC24_VACV_37C_r2-MS_DC24_VACV_zenoSWATH_37C_r2	37C_r2	Q9WU20	Q9WU20	MTHR_MOUSE	Mthfr	6272.99	3285.55	3285.55	6272.99	3285.55	3285.55	3285.55	AAIRNYGIEL	AAIRNYGIEL	AAIRNYGIEL2	2	0.000575374	0.0045201	0.00223214	0.00538793	0.00532481	0.00401606	0.00542299	0	1	6272.99	3285.55	4575.82	1586.67	0.834697	27.1183	26.9304	27.2526	45.4941	27.1452	45.0905	Methylenetetrahydrofolate reductase	0.000750188	0.00096432	0.933161	2175.16	2.53462	0.30317	0	0.99876	0	-10000000	4565.54;1297.14;1872.53;774.921;0;60.2266;205.217;213.411;0;703.993;0;0;
Z:\MS_data\7600_ZenoTof\2022\202210\20221012_MS_DC24_VACV_zenoSWATH_thermostability\20221010_MS_zenoSWATH_DC24_VACV_37C_r3-MS_DC24_VACV_zenoSWATH_37C_r3.mzML	20221010_MS_zenoSWATH_DC24_VACV_37C_r3-MS_DC24_VACV_zenoSWATH_37C_r3	37C_r3	Q9WU20	Q9WU20	MTHR_MOUSE	Mthfr	6097.62	2784.88	2784.88	6097.62	2784.88	2784.88	2784.88	AAIRNYGIEL	AAIRNYGIEL	AAIRNYGIEL2	2	4.33815e-06	4.33815e-06	0.00223214	0.00554939	0.00548246	0.00401606	0.00447427	0	1	6097.62	2784.88	4660.58	1488.33	0.722395	27.1723	26.9576	27.2796	45.4941	27.1569	45.2577	Methylenetetrahydrofolate reductase	0.000750188	0.00096432	0.904055	1947.24	2.68398	0.372885	3.79244	0.999999	0	-10000000	4650.54;2735.86;1209.75;509.5;134.449;520.012;191.196;101.038;0;418.337;131.332;0;
Z:\MS_data\7600_ZenoTof\2022\202210\20221012_MS_DC24_VACV_zenoSWATH_thermostability\20221010_MS_zenoSWATH_DC24_VACV_41C_r1-MS_DC24_VACV_zenoSWATH_41C_r1.mzML	20221010_MS_zenoSWATH_DC24_VACV_41C_r1-MS_DC24_VACV_zenoSWATH_41C_r1	41C_r1	Q9WU20	Q9WU20	MTHR_MOUSE	Mthfr	8924.08	3816.11	3816.11	8924.08	3816.11	3816.11	3816.11	AAIRNYGIEL	AAIRNYGIEL	AAIRNYGIEL2	2	4.72618e-05	4.72618e-05	0.00223214	0.00638978	0.00631579	0.00401606	0.00643777	0	1	8924.08	3816.11	6947.12	2070.91	0.928325	27.1195	27.0121	27.2268	45.4941	27.1215	45.3727	Methylenetetrahydrofolate reductase	0.000750188	0.00096432	0.97245	2660.24	3.87602	0.125689	3.80338	0.999984	0	-10000000	7163.9;1897.68;2281.52;556.819;295.977;82.9237;19.7089;0;0;351.233;60.4818;0;
Z:\MS_data\7600_ZenoTof\2022\202210\20221012_MS_DC24_VACV_zenoSWATH_thermostability\20221010_MS_zenoSWATH_DC24_VACV_41C_r2-MS_DC24_VACV_zenoSWATH_41C_r2.mzML	20221010_MS_zenoSWATH_DC24_VACV_41C_r2-MS_DC24_VACV_zenoSWATH_41C_r2	41C_r2	Q9WU20	Q9WU20	MTHR_MOUSE	Mthfr	8236.3	3879.96	3879.96	8236.3	3879.96	3879.96	3879.96	AAIRNYGIEL	AAIRNYGIEL	AAIRNYGIEL2	2	0.000145482	0.000145482	0.00223214	0.00618557	0.00612245	0.00401606	0.00623053	0	1	8236.3	3879.96	5812.32	1745.6	0.924074	27.1186	26.9575	27.2528	45.4941	27.1217	45.0568	Methylenetetrahydrofolate reductase	0.000750188	0.00096432	0.963239	2473.58	3.83511	0.443139	1.4706	0.999959	0	-10000000	5598.23;2277.97;1550.99;684.39;221.364;129.442;282.018;141.212;0;1477.93;218.886;24.7517;
Z:\MS_data\7600_ZenoTof\2022\202210\20221012_MS_DC24_VACV_zenoSWATH_thermostability\20221010_MS_zenoSWATH_DC24_VACV_41C_r3-MS_DC24_VACV_zenoSWATH_41C_r3.mzML	20221010_MS_zenoSWATH_DC24_VACV_41C_r3-MS_DC24_VACV_zenoSWATH_41C_r3	41C_r3	Q9WU20	Q9WU20	MTHR_MOUSE	Mthfr	7931	3906.02	3906.02	7931	3906.02	3906.02	3906.02	AAIRNYGIEL	AAIRNYGIEL	AAIRNYGIEL2	2	7.58841e-05	7.58841e-05	0.00223214	0.00448431	0.00442968	0.00401606	0.00451977	0	1	7931	3906.02	6064.53	1804.58	0.85533	27.1985	26.9838	27.279	45.4941	27.1582	45.5846	Methylenetetrahydrofolate reductase	0.000750188	0.00096432	0.941249	2359.97	2.82933	0.40225	2.009	0.99998	0	-10000000	6164.52;2078.85;1186.96;124.738;0;305.625;123.537;94.0755;94.329;1061.32;131.332;0;
Z:\MS_data\7600_ZenoTof\2022\202210\20221012_MS_DC24_VACV_zenoSWATH_thermostability\20221010_MS_zenoSWATH_DC24_VACV_45C_r1-MS_DC24_VACV_zenoSWATH_45C_r1.mzML	20221010_MS_zenoSWATH_DC24_VACV_45C_r1-MS_DC24_VACV_zenoSWATH_45C_r1	45C_r1	Q9WU20	Q9WU20	MTHR_MOUSE	Mthfr	8714.46	3401.8	3401.8	8714.46	3401.8	3401.8	3401.8	AAIRNYGIEL	AAIRNYGIEL	AAIRNYGIEL2	2	0.00062461	0.00114445	0.00223214	0.00445434	0.00440044	0.00401606	0.00448934	0	1	8714.46	3401.8	6725.17	2062.64	0.841193	27.1454	27.0112	27.2528	45.4941	27.1675	45.3005	Methylenetetrahydrofolate reductase	0.000750188	0.00096432	0.927065	2672.76	3.35845	0.297545	0	0.999618	0	-10000000	7122.57;1906.51;1521.73;924.864;0;239.333;57.7033;457.849;204.585;573.259;0;0;
Z:\MS_data\7600_ZenoTof\2022\202210\20221012_MS_DC24_VACV_zenoSWATH_thermostability\20221010_MS_zenoSWATH_DC24_VACV_45C_r2-MS_DC24_VACV_zenoSWATH_45C_r2.mzML	20221010_MS_zenoSWATH_DC24_VACV_45C_r2-MS_DC24_VACV_zenoSWATH_45C_r2	45C_r2	Q9WU20	Q9WU20	MTHR_MOUSE	Mthfr	4026.8	2662.59	2662.59	4026.8	2662.59	2662.59	2662.59	AAIRNYGIEL	AAIRNYGIEL	AAIRNYGIEL2	2	0.000476472	0.000476472	0.00223214	0.00764331	0.00754717	0.00401606	0.00771208	0	1	4026.8	2662.59	3329.91	1464.9	0.659515	27.092	26.9847	27.2799	45.4941	27.1526	45.1494	Methylenetetrahydrofolate reductase	0.000750188	0.00096432	0.826341	1771.48	2.09715	0.797171	0.778919	0.999896	0	-10000000	4024.5;2080.46;585.164;38.3216;0;0;104.436;112.97;0;880.914;51.553;0;
Z:\MS_data\7600_ZenoTof\2022\202210\20221012_MS_DC24_VACV_zenoSWATH_thermostability\20221010_MS_zenoSWATH_DC24_VACV_45C_r3-MS_DC24_VACV_zenoSWATH_45C_r3.mzML	20221010_MS_zenoSWATH_DC24_VACV_45C_r3-MS_DC24_VACV_zenoSWATH_45C_r3	45C_r3	Q9WU20	Q9WU20	MTHR_MOUSE	Mthfr	8101.39	3320.33	3320.33	8101.39	3320.33	3320.33	3320.33	AAIRNYGIEL	AAIRNYGIEL	AAIRNYGIEL2	2	0.000296156	0.000296156	0.00223214	0.00461894	0.004561	0.00401606	0.00465116	0	1	8101.39	3320.33	6209.85	2116.43	0.863491	27.1189	26.9847	27.2262	45.4941	27.1685	45.1176	Methylenetetrahydrofolate reductase	0.000750188	0.00096432	0.87272	2761.11	3.76888	0.486731	0	0.999908	0	-10000000	6151.03;2048.62;1771.5;1026.21;118.162;140.228;43.8876;112.971;0;1295.78;0;0;
Z:\MS_data\7600_ZenoTof\2022\202210\20221012_MS_DC24_VACV_zenoSWATH_thermostability\20221010_MS_zenoSWATH_DC24_VACV_49C_r1-MS_DC24_VACV_zenoSWATH_49C_r1.mzML	20221010_MS_zenoSWATH_DC24_VACV_49C_r1-MS_DC24_VACV_zenoSWATH_49C_r1	49C_r1	Q9WU20	Q9WU20	MTHR_MOUSE	Mthfr	773.281	576.327	576.327	773.281	576.327	576.327	576.327	AAIRNYGIEL	AAIRNYGIEL	AAIRNYGIEL2	2	0.000897666	0.00156175	0.00223214	0.00934579	0.00920245	0.00401606	0.00941915	0	1	773.281	576.327	606.674	505.899	0.508775	27.1205	27.0669	27.2279	45.4941	27.1388	45.4082	Methylenetetrahydrofolate reductase	0.000750188	0.00096432	0.950256	644.829	2.39118	0.364021	0.761396	0.99957	0	-10000000	1321.6;447.19;299.359;76.1302;0;219.784;0;0;0;0;218.886;0;
Z:\MS_data\7600_ZenoTof\2022\202210\20221012_MS_DC24_VACV_zenoSWATH_thermostability\20221010_MS_zenoSWATH_DC24_VACV_49C_r2-MS_DC24_VACV_zenoSWATH_49C_r2.mzML	20221010_MS_zenoSWATH_DC24_VACV_49C_r2-MS_DC24_VACV_zenoSWATH_49C_r2	49C_r2	Q9WU20	Q9WU20	MTHR_MOUSE	Mthfr	6596.85	3944.87	3944.87	6596.85	3944.87	3944.87	3944.87	AAIRNYGIEL	AAIRNYGIEL	AAIRNYGIEL2	2	0.000857633	0.000864635	0.00223214	0.00815217	0.00803213	0.00401606	0.00823045	0	1	6596.85	3944.87	5663.82	2064.2	0.803345	27.1187	27.0114	27.3066	45.4941	27.1653	45.0499	Methylenetetrahydrofolate reductase	0.000750188	0.00096432	0.939474	2404.25	2.81576	0.613932	3.70927	0.999781	0	-10000000	4102.02;3214.08;1209.44;68.9267;134.448;245.402;249.915;100.839;0;592.866;350.214;178.356;
Z:\MS_data\7600_ZenoTof\2022\202210\20221012_MS_DC24_VACV_zenoSWATH_thermostability\20221010_MS_zenoSWATH_DC24_VACV_49C_r3-MS_DC24_VACV_zenoSWATH_49C_r3.mzML	20221010_MS_zenoSWATH_DC24_VACV_49C_r3-MS_DC24_VACV_zenoSWATH_49C_r3	49C_r3	Q9WU20	Q9WU20	MTHR_MOUSE	Mthfr	5155.76	3981.5	3981.5	5155.76	3981.5	3981.5	3981.5	AAIRNYGIEL	AAIRNYGIEL	AAIRNYGIEL2	2	0.000940734	0.00180602	0.00223214	0.00857143	0.00843882	0.00401606	0.00865801	0	1	5155.76	3981.5	4084.18	1057.43	0.866275	27.2268	26.9584	27.2805	45.4941	27.1767	45.6241	Methylenetetrahydrofolate reductase	0.000750188	0.00096432	0.870902	1334.87	2.51446	0.506508	3.35909	0.99959	0	-10000000	3927.44;821.856;1393.61;277.769;0;143.374;259.67;240.857;0;481.309;121.827;50.9584;
Z:\MS_data\7600_ZenoTof\2022\202210\20221012_MS_DC24_VACV_zenoSWATH_thermostability\20221010_MS_zenoSWATH_DC24_VACV_53C_r1-MS_DC24_VACV_zenoSWATH_53C_r1.mzML	20221010_MS_zenoSWATH_DC24_VACV_53C_r1-MS_DC24_VACV_zenoSWATH_53C_r1	53C_r1	Q9WU20	Q9WU20	MTHR_MOUSE	Mthfr	4335.81	3379.91	3379.91	4335.81	3379.91	3379.91	3379.91	AAIRNYGIEL	AAIRNYGIEL	AAIRNYGIEL2	2	6.93979e-05	6.93979e-05	0.00223214	0.00739372	0.00724638	0.00401606	0.00747664	0	1	4335.81	3379.91	4499.53	2310.97	0.725841	27.1732	26.9585	27.2538	45.4941	27.2059	45.3726	Methylenetetrahydrofolate reductase	0.000750188	0.00096432	0.962935	2226.88	4.05163	0.249427	0	0.999981	0	-10000000	4211.15;2202.23;1216.21;253.334;0;234.612;404.742;34.2092;0;499.395;0;76.4389;
Z:\MS_data\7600_ZenoTof\2022\202210\20221012_MS_DC24_VACV_zenoSWATH_thermostability\20221010_MS_zenoSWATH_DC24_VACV_53C_r2-MS_DC24_VACV_zenoSWATH_53C_r2.mzML	20221010_MS_zenoSWATH_DC24_VACV_53C_r2-MS_DC24_VACV_zenoSWATH_53C_r2	53C_r2	Q9WU20	Q9WU20	MTHR_MOUSE	Mthfr	4936.91	3966.59	3966.59	4936.91	3966.59	3966.59	3966.59	AAIRNYGIEL	AAIRNYGIEL	AAIRNYGIEL2	2	0.00102775	0.00270147	0.00223214	0.0103448	0.0101868	0.00401606	0.0104348	0	1	4936.91	3966.59	3768.48	1046.02	0.8825	27.1453	27.0112	27.2795	45.4941	27.1148	45.4275	Methylenetetrahydrofolate reductase	0.000750188	0.00096432	0.9328	1370.35	2.71615	0.400486	0	0.999225	0	-10000000	3793.89;1440.05;1029.89;76.1293;107.559;161.804;42.059;112.971;0;145.114;0;0;
Z:\MS_data\7600_ZenoTof\2022\202210\20221012_MS_DC24_VACV_zenoSWATH_thermostability\20221010_MS_zenoSWATH_DC24_VACV_53C_r3-MS_DC24_VACV_zenoSWATH_53C_r3.mzML	20221010_MS_zenoSWATH_DC24_VACV_53C_r3-MS_DC24_VACV_zenoSWATH_53C_r3	53C_r3	Q9WU20	Q9WU20	MTHR_MOUSE	Mthfr	1120.11	1666.63	1666.63	1120.11	1666.63	1666.63	1666.63	AAIRNYGIEL	AAIRNYGIEL	AAIRNYGIEL2	2	0.00093886	0.00093886	0.00223214	0.0111524	0.0109489	0.00401606	0.011257	0	1	1120.11	1666.63	1250.58	911.507	0.591092	27.1455	27.065	27.226	45.4941	27.176	45.3692	Methylenetetrahydrofolate reductase	0.000750188	0.00096432	0.880529	816.414	2.04944	0.701396	0.245929	0.999791	0	-10000000	2221.6;582.6;900.539;37.2928;0;0;115.408;0;0;156.878;175.11;0;
Z:\MS_data\7600_ZenoTof\2022\202210\20221012_MS_DC24_VACV_zenoSWATH_thermostability\20221010_MS_zenoSWATH_DC24_VACV_57C_r1-MS_DC24_VACV_zenoSWATH_57C_r1.mzML	20221010_MS_zenoSWATH_DC24_VACV_57C_r1-MS_DC24_VACV_zenoSWATH_57C_r1	57C_r1	Q9WU20	Q9WU20	MTHR_MOUSE	Mthfr	2265.06	3352.41	3352.41	2265.06	3352.41	3352.41	3352.41	AAIRNYGIEL	AAIRNYGIEL	AAIRNYGIEL2	2	0.0015982	0.0015982	0.00223214	0.0185185	0.0176211	0.00401606	0.0187793	0	1	2265.06	3352.41	2001.06	866.494	0.875778	27.0919	26.9846	27.2798	45.4941	27.1904	45.1371	Methylenetetrahydrofolate reductase	0.000750188	0.00096432	0.830276	980.808	1.93544	0.541559	0	0.999035	0	-10000000	2044.98;673.33;241.15;57.0966;0;126.52;0;0;0;403.091;0;218.945;
Z:\MS_data\7600_ZenoTof\2022\202210\20221012_MS_DC24_VACV_zenoSWATH_thermostability\20221010_MS_zenoSWATH_DC24_VACV_57C_r2-MS_DC24_VACV_zenoSWATH_57C_r2.mzML	20221010_MS_zenoSWATH_DC24_VACV_57C_r2-MS_DC24_VACV_zenoSWATH_57C_r2	57C_r2	Q9WU20	Q9WU20	MTHR_MOUSE	Mthfr	2201.56	5058.72	5058.72	2201.56	5058.72	5058.72	5058.72	AAIRNYGIEL	AAIRNYGIEL	AAIRNYGIEL2	2	0.00167289	0.00167289	0.00223214	0.0217391	0.0266667	0.00401606	0.021978	0	1	2201.56	5058.72	2220.03	834.72	0.851216	27.146	27.0118	27.2534	45.4941	27.1078	45.578	Methylenetetrahydrofolate reductase	0.000750188	0.00096432	0.637473	827.774	2.47667	0.667972	0	0.999119	0	-10000000	1442.49;637.731;430.865;190.322;35.0319;0;115.408;0;0;38.348;0;0;
Z:\MS_data\7600_ZenoTof\2022\202210\20221012_MS_DC24_VACV_zenoSWATH_thermostability\20221010_MS_zenoSWATH_DC24_VACV_61C_r1-MS_DC24_VACV_zenoSWATH_61C_r1.mzML	20221010_MS_zenoSWATH_DC24_VACV_61C_r1-MS_DC24_VACV_zenoSWATH_61C_r1	61C_r1	Q9WU20	Q9WU20	MTHR_MOUSE	Mthfr	1809.92	1428.75	1428.75	1809.92	1428.75	1428.75	1428.75	AAIRNYGIEL	AAIRNYGIEL	AAIRNYGIEL2	2	0.00660066	0.241527	0.00223214	0.0471698	0.0490196	0.00401606	0.0480769	0	1	1809.92	1428.75	1148.03	550.061	0.746776	27.1184	27.0109	27.2526	45.4941	27.0893	45.5132	Methylenetetrahydrofolate reductase	0.000750188	0.00096432	0.499258	867.194	1.65194	0.613089	0	0.827425	0	-10000000	1372.7;1321.77;305.825;347.724;0;88.9906;203.591;0;0;125.503;0;0;
Z:\MS_data\7600_ZenoTof\2022\202210\20221012_MS_DC24_VACV_zenoSWATH_thermostability\20221010_MS_zenoSWATH_DC24_VACV_61C_r2-MS_DC24_VACV_zenoSWATH_61C_r2.mzML	20221010_MS_zenoSWATH_DC24_VACV_61C_r2-MS_DC24_VACV_zenoSWATH_61C_r2	61C_r2	Q9WU20	Q9WU20	MTHR_MOUSE	Mthfr	517.881	435.506	435.506	517.881	435.506	435.506	435.506	AAIRNYGIEL	AAIRNYGIEL	AAIRNYGIEL2	2	0.00401606	0.168999	0.00223214	0.0704225	0.0609756	0.00401606	0.0724638	0	1	517.881	435.506	329.562	267.368	0.361229	27.1454	27.0381	27.1991	45.4941	27.0998	45.7003	Methylenetetrahydrofolate reductase	0.000750188	0.00096432	0.239847	420.148	1.30711	0.514849	0	0.875262	1.25193	0.482259	888.81;475.827;237.146;139.397;107.558;97.0806;0;0;0;149.688;0;101.918;
Z:\MS_data\7600_ZenoTof\2022\202210\20221012_MS_DC24_VACV_zenoSWATH_thermostability\20221010_MS_zenoSWATH_DC24_VACV_37C_r1-MS_DC24_VACV_zenoSWATH_37C_r1.mzML	20221010_MS_zenoSWATH_DC24_VACV_37C_r1-MS_DC24_VACV_zenoSWATH_37C_r1	37C_r1	B2RS91	B2RS91	RRN3_MOUSE	Rrn3	1072.09	401.366	599.817	1072.09	401.366	599.817	599.817	AAITNKYQL	AAITNKYQL	AAITNKYQL2	2	0.000590319	0.00336941	0.00223214	0.00637523	0.00631199	0.00580271	0.00641613	0	1	1072.09	401.366	783.557	1776.35	0.0978949	19.2262	19.1725	19.3604	15.6858	19.1139	16.0797	RNA polymerase I-specific transcription initiation factor RRN3	0.000565132	0.00096432	0.543076	2430.46	2.3415	0.47365	2.0812	0.998904	0	-10000000	3167.96;822.456;732.936;511.575;229.635;229.543;458.213;673.735;564.74;0;57.2323;201.165;
Z:\MS_data\7600_ZenoTof\2022\202210\20221012_MS_DC24_VACV_zenoSWATH_thermostability\20221010_MS_zenoSWATH_DC24_VACV_37C_r2-MS_DC24_VACV_zenoSWATH_37C_r2.mzML	20221010_MS_zenoSWATH_DC24_VACV_37C_r2-MS_DC24_VACV_zenoSWATH_37C_r2	37C_r2	B2RS91	B2RS91	RRN3_MOUSE	Rrn3	2686.94	1407.32	2103.15	2686.94	1407.32	2103.15	2103.15	AAITNKYQL	AAITNKYQL	AAITNKYQL2	2	0.000313048	0.000313048	0.00223214	0.00642398	0.00634921	0.00580271	0.00646552	0	1	2686.94	1407.32	1959.99	1204.98	0.86859	19.2523	19.118	19.3596	15.6858	19.0697	16.3583	RNA polymerase I-specific transcription initiation factor RRN3	0.000565132	0.00096432	0.94388	1651.9	3.1826	0.303787	1.92711	0.999914	0	-10000000	2059.09;775.964;451.728;292.083;245.591;29.6701;67.5748;398.114;725.51;0;0;0;
Z:\MS_data\7600_ZenoTof\2022\202210\20221012_MS_DC24_VACV_zenoSWATH_thermostability\20221010_MS_zenoSWATH_DC24_VACV_37C_r3-MS_DC24_VACV_zenoSWATH_37C_r3.mzML	20221010_MS_zenoSWATH_DC24_VACV_37C_r3-MS_DC24_VACV_zenoSWATH_37C_r3	37C_r3	B2RS91	B2RS91	RRN3_MOUSE	Rrn3	11428.5	5219.59	1638.35	11428.5	5219.59	1638.35	1638.35	AAITNKYQL	AAITNKYQL	AAITNKYQL2	2	1.0329e-05	1.0329e-05	0.00223214	0.00310559	0.003003	0.00580271	0.00314465	0	1	2321.18	1060.12	1774.15	1115.82	0.633939	19.2525	19.1719	19.4135	15.6858	19.1253	16.1693	RNA polymerase I-specific transcription initiation factor RRN3	0.000565132	0.00096432	0.94708	1459.87	3.42374	0.385827	3.03606	0.999997	0	-10000000	3433.98;1094.07;747.747;331.276;966.406;193.202;155.33;945.243;434.663;523.745;261.371;174.797;
Z:\MS_data\7600_ZenoTof\2022\202210\20221012_MS_DC24_VACV_zenoSWATH_thermostability\20221010_MS_zenoSWATH_DC24_VACV_41C_r1-MS_DC24_VACV_zenoSWATH_41C_r1.mzML	20221010_MS_zenoSWATH_DC24_VACV_41C_r1-MS_DC24_VACV_zenoSWATH_41C_r1	41C_r1	B2RS91	B2RS91	RRN3_MOUSE	Rrn3	18621.8	7963.05	2338.3	18621.8	7963.05	2338.3	2338.3	AAITNKYQL	AAITNKYQL	AAITNKYQL2	2	0.00018519	0.00018519	0.00223214	0.00303951	0.00294118	0.00580271	0.00307692	0	1	3489.89	1492.34	2716.77	2006.18	0.807627	19.2532	19.1458	19.3874	15.6858	19.1224	16.1806	RNA polymerase I-specific transcription initiation factor RRN3	0.000565132	0.00096432	0.900129	2577.09	3.27509	0.374922	2.07283	0.999937	0	-10000000	3275.07;620.315;614.119;371.57;478.743;59.8005;78.8684;704.976;88.8611;89.6895;0;0;
Z:\MS_data\7600_ZenoTof\2022\202210\20221012_MS_DC24_VACV_zenoSWATH_thermostability\20221010_MS_zenoSWATH_DC24_VACV_41C_r2-MS_DC24_VACV_zenoSWATH_41C_r2.mzML	20221010_MS_zenoSWATH_DC24_VACV_41C_r2-MS_DC24_VACV_zenoSWATH_41C_r2	41C_r2	B2RS91	B2RS91	RRN3_MOUSE	Rrn3	1693.3	797.68	1192.08	1693.3	797.68	1192.08	1192.08	AAITNKYQL	AAITNKYQL	AAITNKYQL2	2	0.000521029	0.000521029	0.00223214	0.00618557	0.00612245	0.00580271	0.00623053	0	1	1693.3	797.68	1194.95	1272.97	0.622677	19.2792	19.1986	19.3597	15.6858	19.0825	16.4422	RNA polymerase I-specific transcription initiation factor RRN3	0.000565132	0.00096432	0.888374	1803.85	3.81292	0.35959	3.15218	0.999854	0	-10000000	2350.08;1718.17;625.158;630.257;245.862;201.483;390.457;421.136;343.171;23.022;0;0;
Z:\MS_data\7600_ZenoTof\2022\202210\20221012_MS_DC24_VACV_zenoSWATH_thermostability\20221010_MS_zenoSWATH_DC24_VACV_41C_r3-MS_DC24_VACV_zenoSWATH_41C_r3.mzML	20221010_MS_zenoSWATH_DC24_VACV_41C_r3-MS_DC24_VACV_zenoSWATH_41C_r3	41C_r3	B2RS91	B2RS91	RRN3_MOUSE	Rrn3	2320.63	1142.91	1708.01	2320.63	1142.91	1708.01	1708.01	AAITNKYQL	AAITNKYQL	AAITNKYQL2	2	2.32798e-05	2.32798e-05	0.00223214	0.00682594	0.00674916	0.00580271	0.00688073	0	1	2320.63	1142.91	1774.5	1565.98	0.783232	19.2789	19.1178	19.3862	15.6858	19.1139	16.3069	RNA polymerase I-specific transcription initiation factor RRN3	0.000565132	0.00096432	0.955941	2047.93	3.35907	0.236499	2.63019	0.999994	0	-10000000	2617.45;670.593;625.74;343.972;665.365;94.7608;373.049;329.672;501.308;0;137.034;61.2422;
Z:\MS_data\7600_ZenoTof\2022\202210\20221012_MS_DC24_VACV_zenoSWATH_thermostability\20221010_MS_zenoSWATH_DC24_VACV_45C_r1-MS_DC24_VACV_zenoSWATH_45C_r1.mzML	20221010_MS_zenoSWATH_DC24_VACV_45C_r1-MS_DC24_VACV_zenoSWATH_45C_r1	45C_r1	B2RS91	B2RS91	RRN3_MOUSE	Rrn3	1112.68	434.349	649.108	1112.68	434.349	649.108	649.108	AAITNKYQL	AAITNKYQL	AAITNKYQL2	2	0.00062461	0.00110046	0.00223214	0.00548847	0.00542299	0.00580271	0.00553097	0	1	1112.68	434.349	858.684	1348.83	0.716702	19.333	19.2256	19.3866	15.6858	19.1409	16.3969	RNA polymerase I-specific transcription initiation factor RRN3	0.000565132	0.00096432	0.888898	1747.81	3.76206	0.451346	2.27397	0.999633	0	-10000000	2429.8;567.756;499.083;217.611;700.799;189.523;184.581;396.884;605.956;0;57.2316;0;
Z:\MS_data\7600_ZenoTof\2022\202210\20221012_MS_DC24_VACV_zenoSWATH_thermostability\20221010_MS_zenoSWATH_DC24_VACV_45C_r2-MS_DC24_VACV_zenoSWATH_45C_r2.mzML	20221010_MS_zenoSWATH_DC24_VACV_45C_r2-MS_DC24_VACV_zenoSWATH_45C_r2	45C_r2	B2RS91	B2RS91	RRN3_MOUSE	Rrn3	10382.5	6865.07	1400.25	10382.5	6865.07	1400.25	1400.25	AAITNKYQL	AAITNKYQL	AAITNKYQL2	2	0.000761615	0.0051779	0.00223214	0.00342466	0.00330033	0.00580271	0.00348432	0	1	1255.16	829.932	1037.94	1002.99	0.653019	19.2796	19.1454	19.3601	15.6858	19.1124	16.3051	RNA polymerase I-specific transcription initiation factor RRN3	0.000565132	0.00096432	0.910895	1212.9	2.70293	0.459167	1.72118	0.998868	0	-10000000	2039.02;646.592;961.559;27.4365;81.1423;0;224.758;176.963;120.724;0;85.847;0;
Z:\MS_data\7600_ZenoTof\2022\202210\20221012_MS_DC24_VACV_zenoSWATH_thermostability\20221010_MS_zenoSWATH_DC24_VACV_45C_r3-MS_DC24_VACV_zenoSWATH_45C_r3.mzML	20221010_MS_zenoSWATH_DC24_VACV_45C_r3-MS_DC24_VACV_zenoSWATH_45C_r3	45C_r3	B2RS91	B2RS91	RRN3_MOUSE	Rrn3	3915.49	1604.76	2398.21	3915.49	1604.76	2398.21	2398.21	AAITNKYQL	AAITNKYQL	AAITNKYQL2	2	0.000587889	0.000881133	0.00223214	0.00685714	0.00677201	0.00580271	0.00690449	0	1	3915.49	1604.76	3001.29	1642.11	0.904169	19.3332	19.1185	19.4137	15.6858	19.1185	16.4795	RNA polymerase I-specific transcription initiation factor RRN3	0.000565132	0.00096432	0.966101	2142.3	3.2409	0.214979	2.6314	0.999727	1.40444	0.308302	3113.73;815.376;532.777;584.006;819;384.796;454.696;314.465;311.601;104.558;204.945;0;
Z:\MS_data\7600_ZenoTof\2022\202210\20221012_MS_DC24_VACV_zenoSWATH_thermostability\20221010_MS_zenoSWATH_DC24_VACV_49C_r1-MS_DC24_VACV_zenoSWATH_49C_r1.mzML	20221010_MS_zenoSWATH_DC24_VACV_49C_r1-MS_DC24_VACV_zenoSWATH_49C_r1	49C_r1	B2RS91	B2RS91	RRN3_MOUSE	Rrn3	2377.02	1771.59	1142.92	2377.02	1771.59	1142.92	1142.92	AAITNKYQL	AAITNKYQL	AAITNKYQL2	2	0.00175593	0.186245	0.00223214	0.00505051	0.00478469	0.00580271	0.00512821	0	1	1152.52	858.978	904.209	224.166	0.930005	19.3076	19.2002	19.3881	15.6858	19.1277	16.353	RNA polymerase I-specific transcription initiation factor RRN3	0.000565132	0.00096432	0.791152	285.727	2.11905	0.104263	0.642866	0.951171	0	-10000000	1152.52;181.925;0;0;167.695;0;0;87.5566;0;0;0;0;
Z:\MS_data\7600_ZenoTof\2022\202210\20221012_MS_DC24_VACV_zenoSWATH_thermostability\20221010_MS_zenoSWATH_DC24_VACV_49C_r2-MS_DC24_VACV_zenoSWATH_49C_r2.mzML	20221010_MS_zenoSWATH_DC24_VACV_49C_r2-MS_DC24_VACV_zenoSWATH_49C_r2	49C_r2	B2RS91	B2RS91	RRN3_MOUSE	Rrn3	3242.36	1938.91	2897.58	3242.36	1938.91	2897.58	2897.58	AAITNKYQL	AAITNKYQL	AAITNKYQL2	2	0.000857633	0.00148701	0.00223214	0.00823045	0.00811908	0.00580271	0.00831025	0	1	3242.36	1938.91	2783.78	1591.69	0.909443	19.306	19.1718	19.3865	15.6858	19.1534	16.256	RNA polymerase I-specific transcription initiation factor RRN3	0.000565132	0.00096432	0.928866	1853.9	3.82167	0.350662	2.79246	0.999624	0	-10000000	2756.02;689.544;776.508;346.484;330.791;0;51.2829;532.122;344.631;140.051;49.9766;91.8643;
Z:\MS_data\7600_ZenoTof\2022\202210\20221012_MS_DC24_VACV_zenoSWATH_thermostability\20221010_MS_zenoSWATH_DC24_VACV_49C_r3-MS_DC24_VACV_zenoSWATH_49C_r3.mzML	20221010_MS_zenoSWATH_DC24_VACV_49C_r3-MS_DC24_VACV_zenoSWATH_49C_r3	49C_r3	B2RS91	B2RS91	RRN3_MOUSE	Rrn3	1329.07	1026.36	1533.84	1329.07	1026.36	1533.84	1533.84	AAITNKYQL	AAITNKYQL	AAITNKYQL2	2	0.000940734	0.0630527	0.00223214	0.00857143	0.00843882	0.00580271	0.00865801	0	1	1329.07	1026.36	1052.83	1025.56	0.79735	19.3337	19.1726	19.4142	15.6858	19.1344	16.4086	RNA polymerase I-specific transcription initiation factor RRN3	0.000565132	0.00096432	0.868706	1294.64	2.11721	0.1928	0.94934	0.985884	0	-10000000	1329.07;443.694;325.65;52.9915;0;0;157.739;0;0;0;73.3532;0;
Z:\MS_data\7600_ZenoTof\2022\202210\20221012_MS_DC24_VACV_zenoSWATH_thermostability\20221010_MS_zenoSWATH_DC24_VACV_53C_r1-MS_DC24_VACV_zenoSWATH_53C_r1.mzML	20221010_MS_zenoSWATH_DC24_VACV_53C_r1-MS_DC24_VACV_zenoSWATH_53C_r1	53C_r1	B2RS91	B2RS91	RRN3_MOUSE	Rrn3	664.641	518.109	774.283	664.641	518.109	774.283	774.283	AAITNKYQL	AAITNKYQL	AAITNKYQL2	2	0.000898473	0.0105047	0.00223214	0.00943396	0.00928793	0.00580271	0.00952381	0	1	664.641	518.109	689.738	1098.26	0.351032	19.2799	19.2262	19.4141	15.6858	19.142	16.2189	RNA polymerase I-specific transcription initiation factor RRN3	0.000565132	0.00096432	0.861972	1058.3	2.81549	0.239301	2.34588	0.997148	0	-10000000	1829.67;424.745;260.285;142.827;309.964;0;0;77.0746;228.293;0;57.2307;122.483;
Z:\MS_data\7600_ZenoTof\2022\202210\20221012_MS_DC24_VACV_zenoSWATH_thermostability\20221010_MS_zenoSWATH_DC24_VACV_53C_r2-MS_DC24_VACV_zenoSWATH_53C_r2.mzML	20221010_MS_zenoSWATH_DC24_VACV_53C_r2-MS_DC24_VACV_zenoSWATH_53C_r2	53C_r2	B2RS91	B2RS91	RRN3_MOUSE	Rrn3	3622.57	2910.58	4349.68	3622.57	2910.58	4349.68	4349.68	AAITNKYQL	AAITNKYQL	AAITNKYQL2	2	0.00102775	0.00252926	0.00223214	0.0103448	0.0101868	0.00580271	0.0104348	0	1	3622.57	2910.58	2765.21	1283.43	0.868965	19.2794	19.1988	19.4135	15.6858	19.1218	16.2602	RNA polymerase I-specific transcription initiation factor RRN3	0.000565132	0.00096432	0.964916	1681.36	4.37217	0.304799	3.08816	0.999275	0	-10000000	3160.36;716.581;317.518;470.967;661.853;128.341;341.392;309.738;636.942;0;85.8469;0;
Z:\MS_data\7600_ZenoTof\2022\202210\20221012_MS_DC24_VACV_zenoSWATH_thermostability\20221010_MS_zenoSWATH_DC24_VACV_53C_r3-MS_DC24_VACV_zenoSWATH_53C_r3.mzML	20221010_MS_zenoSWATH_DC24_VACV_53C_r3-MS_DC24_VACV_zenoSWATH_53C_r3	53C_r3	B2RS91	B2RS91	RRN3_MOUSE	Rrn3	2516.88	3744.91	1985.38	2516.88	3744.91	1985.38	1985.38	AAITNKYQL	AAITNKYQL	AAITNKYQL2	2	0.00117509	0.020733	0.00223214	0.00854701	0.0078125	0.00580271	0.00877193	0	1	960.865	1429.68	1072.78	941.941	0.787002	19.3329	19.1182	19.3866	15.6858	19.1314	16.4155	RNA polymerase I-specific transcription initiation factor RRN3	0.000565132	0.00096432	0.679634	843.673	1.95311	0.157117	1.46267	0.995408	0	-10000000	902.225;232.712;132.468;173.712;0;0;15.9218;223.826;208.416;0;57.232;0;
Z:\MS_data\7600_ZenoTof\2022\202210\20221012_MS_DC24_VACV_zenoSWATH_thermostability\20221010_MS_zenoSWATH_DC24_VACV_57C_r1-MS_DC24_VACV_zenoSWATH_57C_r1.mzML	20221010_MS_zenoSWATH_DC24_VACV_57C_r1-MS_DC24_VACV_zenoSWATH_57C_r1	57C_r1	B2RS91	B2RS91	RRN3_MOUSE	Rrn3	503.281	744.883	1113.18	503.281	744.883	1113.18	1113.18	AAITNKYQL	AAITNKYQL	AAITNKYQL2	2	0.00248756	0.00826482	0.00223214	0.0213523	0.0206186	0.00580271	0.0215827	0	1	503.281	744.883	444.623	547.902	0.903495	19.3065	19.226	19.3602	15.6858	19.1267	16.3848	RNA polymerase I-specific transcription initiation factor RRN3	0.000565132	0.00096432	0.791277	620.185	2.10354	0.114127	1.22489	0.995027	0	-10000000	390.775;112.189;400.891;138.594;0;0;0;0;261.617;0;0;306.217;
Z:\MS_data\7600_ZenoTof\2022\202210\20221012_MS_DC24_VACV_zenoSWATH_thermostability\20221010_MS_zenoSWATH_DC24_VACV_57C_r2-MS_DC24_VACV_zenoSWATH_57C_r2.mzML	20221010_MS_zenoSWATH_DC24_VACV_57C_r2-MS_DC24_VACV_zenoSWATH_57C_r2	57C_r2	B2RS91	B2RS91	RRN3_MOUSE	Rrn3	135.489	311.325	0	135.489	311.325			AAITNKYQL	AAITNKYQL	AAITNKYQL2	2	0.0100251	0.12815	0.00223214	0.0217391	0.0348259	0.00580271	0.021978	0	1	135.489	311.325	136.625	335.251	0.540234	19.2529	19.1992	19.3066	15.6858	19.1644	16.0469	RNA polymerase I-specific transcription initiation factor RRN3	0.000565132	0.00096432	0.712457	332.461	2.15154	0.216499	0	0.936725	0	-10000000	468.059;0;132.468;0;0;134.32;0;0;0;0;85.8469;0;
Z:\MS_data\7600_ZenoTof\2022\202210\20221012_MS_DC24_VACV_zenoSWATH_thermostability\20221010_MS_zenoSWATH_DC24_VACV_57C_r3-MS_DC24_VACV_zenoSWATH_57C_r3.mzML	20221010_MS_zenoSWATH_DC24_VACV_57C_r3-MS_DC24_VACV_zenoSWATH_57C_r3	57C_r3	B2RS91	B2RS91	RRN3_MOUSE	Rrn3	46.0997	84.4048	126.138	46.0997	84.4048	126.138	126.138	AAITNKYQL	AAITNKYQL	AAITNKYQL2	2	0.002457	0.0491649	0.00223214	0.0291262	0.0277778	0.00580271	0.0295567	0	1	46.0997	84.4048	48.8992	218.5	0.801784	19.3064	19.2528	19.3601	15.6858	19.1537	16.2175	RNA polymerase I-specific transcription initiation factor RRN3	0.000565132	0.00096432	0.739674	205.991	2.33811	0.141987	0	0.971543	0	-10000000	35.525;19.4559;0;0;0;20.9303;0;0;0;0;0;0;
Z:\MS_data\7600_ZenoTof\2022\202210\20221012_MS_DC24_VACV_zenoSWATH_thermostability\20221010_MS_zenoSWATH_DC24_VACV_61C_r1-MS_DC24_VACV_zenoSWATH_61C_r1.mzML	20221010_MS_zenoSWATH_DC24_VACV_61C_r1-MS_DC24_VACV_zenoSWATH_61C_r1	61C_r1	B2RS91	B2RS91	RRN3_MOUSE	Rrn3	674.247	532.248	795.413	674.247	532.248	795.413	795.413	AAITNKYQL	AAITNKYQL	AAITNKYQL2	2	0.00660066	0.217571	0.00223214	0.0471698	0.0517241	0.00580271	0.0480769	0	1	674.247	532.248	427.675	544.412	0.642719	19.2521	19.1984	19.4131	15.6858	19.1474	16.0497	RNA polymerase I-specific transcription initiation factor RRN3	0.000565132	0.00096432	0.691598	858.289	1.59866	0.528573	0.979217	0.841834	0	-10000000	605.279;435.356;132.468;58.6362;0;134.321;17.4028;237.798;186.492;0;0;91.864;
Z:\MS_data\7600_ZenoTof\2022\202210\20221012_MS_DC24_VACV_zenoSWATH_thermostability\20221010_MS_zenoSWATH_DC24_VACV_61C_r2-MS_DC24_VACV_zenoSWATH_61C_r2.mzML	20221010_MS_zenoSWATH_DC24_VACV_61C_r2-MS_DC24_VACV_zenoSWATH_61C_r2	61C_r2	B2RS91	B2RS91	RRN3_MOUSE	Rrn3	765.079	643.386	961.501	765.079	643.386	961.501	961.501	AAITNKYQL	AAITNKYQL	AAITNKYQL2	2	0.00401606	0.190047	0.00223214	0.0752688	0.0679612	0.00580271	0.0769231	0	1	765.079	643.386	486.871	186.76	0.812757	19.2792	19.1718	19.3865	15.6858	19.126	16.2433	RNA polymerase I-specific transcription initiation factor RRN3	0.000565132	0.00096432	0.253761	293.479	1.58232	0.617809	0.44346	0.861872	1.05313	0.551317	554.568;749.18;0;0;0;147.432;11.4785;98.0383;133.292;0;0;61.242;
Z:\MS_data\7600_ZenoTof\2022\202210\20221012_MS_DC24_VACV_zenoSWATH_thermostability\20221010_MS_zenoSWATH_DC24_VACV_37C_r1-MS_DC24_VACV_zenoSWATH_37C_r1.mzML	20221010_MS_zenoSWATH_DC24_VACV_37C_r1-MS_DC24_VACV_zenoSWATH_37C_r1	37C_r1	Q7TT50	Q7TT50	MRCKB_MOUSE	Cdc42bpb	26471.5	9910.34	9910.34	26471.5	9910.34	9910.34	9910.34	AAIVDGDRI	AAIVDGDRI	AAIVDGDRI2	2	3.29345e-06	3.29345e-06	0.00206816	0.00535332	0.00529101	0.00401606	0.00539374	0	1	26471.5	9910.34	19347.2	3486.44	0.927519	18.0701	17.8285	18.1506	11.1748	17.9201	11.7673	Serine/threonine-protein kinase MRCK beta	0.000185527	0.00260417	0.965662	4770.27	5.36981	0.826042	1.78626	0.999999	0	-10000000	14070.7;10013;2674.36;2616.51;2592.36;754.744;
Z:\MS_data\7600_ZenoTof\2022\202210\20221012_MS_DC24_VACV_zenoSWATH_thermostability\20221010_MS_zenoSWATH_DC24_VACV_37C_r2-MS_DC24_VACV_zenoSWATH_37C_r2.mzML	20221010_MS_zenoSWATH_DC24_VACV_37C_r2-MS_DC24_VACV_zenoSWATH_37C_r2	37C_r2	Q7TT50	Q7TT50	MRCKB_MOUSE	Cdc42bpb	18742.7	9816.7	9816.7	18742.7	9816.7	9816.7	9816.7	AAIVDGDRI	AAIVDGDRI	AAIVDGDRI2	2	0.000268541	0.000268541	0.00206816	0.00507614	0.00493827	0.00401606	0.00512821	0	1	18742.7	9816.7	13671.8	2590.21	0.894	17.9888	17.8546	18.1229	11.1748	17.8713	11.6547	Serine/threonine-protein kinase MRCK beta	0.000185527	0.00260417	0.9854	3550.92	5.31882	0.47992	1.744	0.999926	0	-10000000	9122.87;8198.95;2085.94;1992.53;2429.35;845.024;
Z:\MS_data\7600_ZenoTof\2022\202210\20221012_MS_DC24_VACV_zenoSWATH_thermostability\20221010_MS_zenoSWATH_DC24_VACV_37C_r3-MS_DC24_VACV_zenoSWATH_37C_r3.mzML	20221010_MS_zenoSWATH_DC24_VACV_37C_r3-MS_DC24_VACV_zenoSWATH_37C_r3	37C_r3	Q7TT50	Q7TT50	MRCKB_MOUSE	Cdc42bpb	18871.5	8618.9	8618.9	18871.5	8618.9	8618.9	8618.9	AAIVDGDRI	AAIVDGDRI	AAIVDGDRI2	2	5.28849e-05	5.28849e-05	0.00206816	0.00554939	0.00548246	0.00401606	0.00447427	0	1	18871.5	8618.9	14424	2546.76	0.905225	18.0158	17.8548	18.15	11.1748	17.9299	11.5241	Serine/threonine-protein kinase MRCK beta	0.000185527	0.00260417	0.904954	3332.02	4.14866	0.597943	1.40749	0.999985	0	-10000000	10261.7;7568.6;2117.47;2791.31;1719.07;771.359;
Z:\MS_data\7600_ZenoTof\2022\202210\20221012_MS_DC24_VACV_zenoSWATH_thermostability\20221010_MS_zenoSWATH_DC24_VACV_41C_r1-MS_DC24_VACV_zenoSWATH_41C_r1.mzML	20221010_MS_zenoSWATH_DC24_VACV_41C_r1-MS_DC24_VACV_zenoSWATH_41C_r1	41C_r1	Q7TT50	Q7TT50	MRCKB_MOUSE	Cdc42bpb	19860.8	8492.87	8492.87	19860.8	8492.87	8492.87	8492.87	AAIVDGDRI	AAIVDGDRI	AAIVDGDRI2	2	2.24887e-05	2.24887e-05	0.00206816	0.00638978	0.00631579	0.00401606	0.00643777	0	1	19860.8	8492.87	15461	3249.66	0.893747	18.0166	17.8555	18.124	11.1748	17.9222	11.5441	Serine/threonine-protein kinase MRCK beta	0.000185527	0.00260417	0.925543	4174.43	4.82461	0.55051	1.64026	0.999992	0	-10000000	9357.93;10582.5;2812.43;2221.11;2340.03;1094.64;
Z:\MS_data\7600_ZenoTof\2022\202210\20221012_MS_DC24_VACV_zenoSWATH_thermostability\20221010_MS_zenoSWATH_DC24_VACV_41C_r2-MS_DC24_VACV_zenoSWATH_41C_r2.mzML	20221010_MS_zenoSWATH_DC24_VACV_41C_r2-MS_DC24_VACV_zenoSWATH_41C_r2	41C_r2	Q7TT50	Q7TT50	MRCKB_MOUSE	Cdc42bpb	27892.4	13139.6	13139.6	27892.4	13139.6	13139.6	13139.6	AAIVDGDRI	AAIVDGDRI	AAIVDGDRI2	2	0.000403343	0.000403343	0.00206816	0.00507614	0.00493827	0.00401606	0.00514139	0	1	27892.4	13139.6	19683.5	3361.88	0.960829	18.0157	17.8547	18.123	11.1748	17.9218	11.5329	Serine/threonine-protein kinase MRCK beta	0.000185527	0.00260417	0.993041	4763.93	5.79364	0.513604	1.77049	0.999887	0	-10000000	13205.9;11146.9;2799.83;3828.27;3306.49;1807.47;
Z:\MS_data\7600_ZenoTof\2022\202210\20221012_MS_DC24_VACV_zenoSWATH_thermostability\20221010_MS_zenoSWATH_DC24_VACV_41C_r3-MS_DC24_VACV_zenoSWATH_41C_r3.mzML	20221010_MS_zenoSWATH_DC24_VACV_41C_r3-MS_DC24_VACV_zenoSWATH_41C_r3	41C_r3	Q7TT50	Q7TT50	MRCKB_MOUSE	Cdc42bpb	20808.2	10248.1	10248.1	20808.2	10248.1	10248.1	10248.1	AAIVDGDRI	AAIVDGDRI	AAIVDGDRI2	2	1.79074e-06	1.79074e-06	0.00206816	0.00448431	0.00442968	0.00401606	0.00451977	0	1	20808.2	10248.1	15911.3	2566.12	0.948176	18.0155	17.8813	18.1229	11.1748	17.9161	11.5437	Serine/threonine-protein kinase MRCK beta	0.000185527	0.00260417	0.941308	3355.89	5.52726	0.531908	1.69014	1	0	-10000000	10368.8;8185.07;2502.25;2523.52;2058.55;990.691;
Z:\MS_data\7600_ZenoTof\2022\202210\20221012_MS_DC24_VACV_zenoSWATH_thermostability\20221010_MS_zenoSWATH_DC24_VACV_45C_r1-MS_DC24_VACV_zenoSWATH_45C_r1.mzML	20221010_MS_zenoSWATH_DC24_VACV_45C_r1-MS_DC24_VACV_zenoSWATH_45C_r1	45C_r1	Q7TT50	Q7TT50	MRCKB_MOUSE	Cdc42bpb	20763.7	8105.36	8105.36	20763.7	8105.36	8105.36	8105.36	AAIVDGDRI	AAIVDGDRI	AAIVDGDRI2	2	6.78939e-06	6.78939e-06	0.00206816	0.00445434	0.00440044	0.00401606	0.00448934	0	1	20763.7	8105.36	16023.8	3149.44	0.962645	18.0427	17.8817	18.1501	11.1748	17.9327	11.5955	Serine/threonine-protein kinase MRCK beta	0.000185527	0.00260417	0.988034	4081.05	5.6158	0.72269	1.81306	0.999998	0	-10000000	10913.2;7565.55;2087.84;2447.35;2377.96;671.479;
Z:\MS_data\7600_ZenoTof\2022\202210\20221012_MS_DC24_VACV_zenoSWATH_thermostability\20221010_MS_zenoSWATH_DC24_VACV_45C_r2-MS_DC24_VACV_zenoSWATH_45C_r2.mzML	20221010_MS_zenoSWATH_DC24_VACV_45C_r2-MS_DC24_VACV_zenoSWATH_45C_r2	45C_r2	Q7TT50	Q7TT50	MRCKB_MOUSE	Cdc42bpb	10940.9	7234.28	7234.29	10940.9	7234.28	7234.29	7234.29	AAIVDGDRI	AAIVDGDRI	AAIVDGDRI2	2	6.04384e-05	6.04384e-05	0.00206816	0.00600601	0.00581395	0.00401606	0.00609756	0	1	10940.9	7234.28	9047.4	1794.92	0.87198	18.0698	17.8551	18.1503	11.1748	17.9108	11.7833	Serine/threonine-protein kinase MRCK beta	0.000185527	0.00260417	0.92757	2170.57	3.61762	0.53005	1.22715	0.999987	0	-10000000	5494.48;5603.03;1900.39;1809.4;1277.07;345.987;
Z:\MS_data\7600_ZenoTof\2022\202210\20221012_MS_DC24_VACV_zenoSWATH_thermostability\20221010_MS_zenoSWATH_DC24_VACV_45C_r3-MS_DC24_VACV_zenoSWATH_45C_r3.mzML	20221010_MS_zenoSWATH_DC24_VACV_45C_r3-MS_DC24_VACV_zenoSWATH_45C_r3	45C_r3	Q7TT50	Q7TT50	MRCKB_MOUSE	Cdc42bpb	19650.6	8053.75	8053.75	19650.6	8053.75	8053.75	8053.75	AAIVDGDRI	AAIVDGDRI	AAIVDGDRI2	2	4.97719e-05	4.97719e-05	0.00206816	0.00461894	0.004561	0.00401606	0.00465116	0	1	19650.6	8053.75	15062.5	2438.74	0.843337	18.0162	17.8551	18.1504	11.1748	17.9173	11.5367	Serine/threonine-protein kinase MRCK beta	0.000185527	0.00260417	0.965581	3181.59	4.84097	0.604996	1.70348	0.999985	0	-10000000	9900.51;7908.09;2528.74;3445.87;2171.25;864.963;
Z:\MS_data\7600_ZenoTof\2022\202210\20221012_MS_DC24_VACV_zenoSWATH_thermostability\20221010_MS_zenoSWATH_DC24_VACV_49C_r1-MS_DC24_VACV_zenoSWATH_49C_r1.mzML	20221010_MS_zenoSWATH_DC24_VACV_49C_r1-MS_DC24_VACV_zenoSWATH_49C_r1	49C_r1	Q7TT50	Q7TT50	MRCKB_MOUSE	Cdc42bpb	4554.8	3394.7	3394.7	4554.8	3394.7	3394.7	3394.7	AAIVDGDRI	AAIVDGDRI	AAIVDGDRI2	2	0.000390366	0.000390366	0.00206816	0.00934579	0.00920245	0.00401606	0.00941915	0	1	4554.8	3394.7	3573.45	622.781	0.92158	18.0172	17.9366	18.1514	11.1748	17.9133	11.5604	Serine/threonine-protein kinase MRCK beta	0.000185527	0.00260417	0.931515	793.81	4.32207	0.501676	1.60349	0.999892	1.06562	0.194978	1789.53;2556;86.7924;399.319;490.924;213.794;
Z:\MS_data\7600_ZenoTof\2022\202210\20221012_MS_DC24_VACV_zenoSWATH_thermostability\20221010_MS_zenoSWATH_DC24_VACV_49C_r2-MS_DC24_VACV_zenoSWATH_49C_r2.mzML	20221010_MS_zenoSWATH_DC24_VACV_49C_r2-MS_DC24_VACV_zenoSWATH_49C_r2	49C_r2	Q7TT50	Q7TT50	MRCKB_MOUSE	Cdc42bpb	13485.6	8064.29	8064.29	13485.6	8064.29	8064.29	8064.29	AAIVDGDRI	AAIVDGDRI	AAIVDGDRI2	2	0.000227375	0.000227375	0.00206816	0.00689655	0.00664452	0.00401606	0.00699301	0	1	13485.6	8064.29	11578.2	2173.59	0.892889	17.9889	17.8816	18.1768	11.1748	17.9373	11.3778	Serine/threonine-protein kinase MRCK beta	0.000185527	0.00260417	0.942789	2531.65	4.35419	0.521589	1.38562	0.999942	0	-10000000	6808.07;6496.76;1305.03;1471.85;1586.86;501.623;
Z:\MS_data\7600_ZenoTof\2022\202210\20221012_MS_DC24_VACV_zenoSWATH_thermostability\20221010_MS_zenoSWATH_DC24_VACV_49C_r3-MS_DC24_VACV_zenoSWATH_49C_r3.mzML	20221010_MS_zenoSWATH_DC24_VACV_49C_r3-MS_DC24_VACV_zenoSWATH_49C_r3	49C_r3	Q7TT50	Q7TT50	MRCKB_MOUSE	Cdc42bpb	7230.18	5583.46	5583.46	7230.18	5583.46	5583.46	5583.46	AAIVDGDRI	AAIVDGDRI	AAIVDGDRI2	2	0.000669143	0.000669143	0.00206816	0.0078125	0.00749064	0.00401606	0.00793651	0	1	7230.18	5583.46	5727.45	1053.12	0.896626	18.0433	17.9359	18.1506	11.1748	17.9342	11.5889	Serine/threonine-protein kinase MRCK beta	0.000185527	0.00260417	0.958719	1329.43	4.29009	0.557887	1.59947	0.999848	0	-10000000	4030.82;2967.86;755.698;1085.08;856.787;271.581;
Z:\MS_data\7600_ZenoTof\2022\202210\20221012_MS_DC24_VACV_zenoSWATH_thermostability\20221010_MS_zenoSWATH_DC24_VACV_53C_r1-MS_DC24_VACV_zenoSWATH_53C_r1.mzML	20221010_MS_zenoSWATH_DC24_VACV_53C_r1-MS_DC24_VACV_zenoSWATH_53C_r1	53C_r1	Q7TT50	Q7TT50	MRCKB_MOUSE	Cdc42bpb	2658.6	2072.47	2072.47	2658.6	2072.47	2072.47	2072.47	AAIVDGDRI	AAIVDGDRI	AAIVDGDRI2	2	0.000311326	0.000311326	0.00206816	0.00739372	0.00724638	0.00401606	0.00747664	0	1	2658.6	2072.47	2758.99	706.257	0.904844	18.0164	17.9091	18.1507	11.1748	17.9226	11.5336	Serine/threonine-protein kinase MRCK beta	0.000185527	0.00260417	0.819188	680.559	2.833	0.50881	1.11257	0.999915	0	-10000000	1096.1;1580.49;151.307;123.7;83.8381;176.501;
Z:\MS_data\7600_ZenoTof\2022\202210\20221012_MS_DC24_VACV_zenoSWATH_thermostability\20221010_MS_zenoSWATH_DC24_VACV_53C_r2-MS_DC24_VACV_zenoSWATH_53C_r2.mzML	20221010_MS_zenoSWATH_DC24_VACV_53C_r2-MS_DC24_VACV_zenoSWATH_53C_r2	53C_r2	Q7TT50	Q7TT50	MRCKB_MOUSE	Cdc42bpb	6472.68	5200.51	5200.51	6472.68	5200.51	5200.51	5200.51	AAIVDGDRI	AAIVDGDRI	AAIVDGDRI2	2	0.00102775	0.0022926	0.00206816	0.0052356	0.00495049	0.00401606	0.00534759	0	1	6472.68	5200.51	4940.77	1126.72	0.829703	18.016	17.9086	18.177	11.1748	17.9249	11.5238	Serine/threonine-protein kinase MRCK beta	0.000185527	0.00260417	0.94969	1476.06	4.22823	0.48515	1.43389	0.999342	0	-10000000	3205.63;3154.87;514.656;668.041;321.608;160.253;
Z:\MS_data\7600_ZenoTof\2022\202210\20221012_MS_DC24_VACV_zenoSWATH_thermostability\20221010_MS_zenoSWATH_DC24_VACV_53C_r3-MS_DC24_VACV_zenoSWATH_53C_r3.mzML	20221010_MS_zenoSWATH_DC24_VACV_53C_r3-MS_DC24_VACV_zenoSWATH_53C_r3	53C_r3	Q7TT50	Q7TT50	MRCKB_MOUSE	Cdc42bpb	1895.01	2819.62	2819.62	1895.01	2819.62	2819.62	2819.62	AAIVDGDRI	AAIVDGDRI	AAIVDGDRI2	2	0.000875882	0.000875882	0.00206816	0.0111524	0.0109489	0.00401606	0.011257	0	1	1895.01	2819.62	2115.74	446.792	0.831469	17.9621	17.8548	18.1501	11.1748	17.9127	11.3689	Serine/threonine-protein kinase MRCK beta	0.000185527	0.00260417	0.921866	400.18	2.90968	0.572267	1.20629	0.999805	0	-10000000	1532.61;1535.37;290.005;248.967;232.82;165.977;
Z:\MS_data\7600_ZenoTof\2022\202210\20221012_MS_DC24_VACV_zenoSWATH_thermostability\20221010_MS_zenoSWATH_DC24_VACV_37C_r2-MS_DC24_VACV_zenoSWATH_37C_r2.mzML	20221010_MS_zenoSWATH_DC24_VACV_37C_r2-MS_DC24_VACV_zenoSWATH_37C_r2	37C_r2	P97287	P97287	MCL1_MOUSE	Mcl1	11058.4	5791.97	6361.85	11058.4	5791.97	6361.85	6361.85	AAIVSPEEEL	AAIVSPEEEL	AAIVSPEEEL2	2	0.000575374	0.0210298	0.17222	0.00538793	0.00532481	0.0132743	0.00542299	0	1	2578.25	1350.39	1880.7	944.234	0.848902	28.8349	28.6201	28.9154	52.6937	28.8372	52.7714	Induced myeloid leukemia cell differentiation protein Mcl-1 homolog	0.0148683	0.00096432	0.169719	1294.45	1.13248	0.401613	0.350463	0.994259	0	-10000000	2578.25;130.341;34.8935;0;125.662;0;0;0;0;0;0;0;
Z:\MS_data\7600_ZenoTof\2022\202210\20221012_MS_DC24_VACV_zenoSWATH_thermostability\20221010_MS_zenoSWATH_DC24_VACV_41C_r1-MS_DC24_VACV_zenoSWATH_41C_r1.mzML	20221010_MS_zenoSWATH_DC24_VACV_41C_r1-MS_DC24_VACV_zenoSWATH_41C_r1	41C_r1	P97287	P97287	MCL1_MOUSE	Mcl1	28643.4	12248.5	11148.8	28643.4	12248.5	11148.8	11148.8	AAIVSPEEEL	AAIVSPEEEL	AAIVSPEEEL2	2	0.00293112	0.298371	0.17222	0.00638978	0.00631579	0.0132743	0.00643777	0	1	1063.48	454.764	827.884	483.495	0.767773	28.8092	28.7555	28.8629	52.6937	28.8304	52.8411	Induced myeloid leukemia cell differentiation protein Mcl-1 homolog	0.0148683	0.00096432	0	621.085	0.910113	0.186999	0.372018	0.90808	0	-10000000	1622.36;177.517;129.236;0;88.9927;0;0;0;0;0;0;0;
Z:\MS_data\7600_ZenoTof\2022\202210\20221012_MS_DC24_VACV_zenoSWATH_thermostability\20221010_MS_zenoSWATH_DC24_VACV_37C_r1-MS_DC24_VACV_zenoSWATH_37C_r1.mzML	20221010_MS_zenoSWATH_DC24_VACV_37C_r1-MS_DC24_VACV_zenoSWATH_37C_r1	37C_r1	Q8K2K6	Q8K2K6	AGFG1_MOUSE	Agfg1	17526.2	6561.43	5340.4	17526.2	6561.43	5340.4	5340.4	AALANLDNI	AALANLDNI	AALANLDNI2	2	0.000590319	0.00490793	0.00892857	0.00294985	0.00285714	0.00214592	0.00299401	0	1	561.529	210.224	410.404	893.767	0.825093	29.2626	29.0747	29.3699	53.2123	29.0571	53.5877	Arf-GAP domain and FG repeat-containing protein 1	0.00129282	0.00096432	0.906942	1222.88	2.28281	0.152694	0.629731	0.998404	2.09587	0.400799	450.273;255.862;742.597;253;467.58;2120.94;748.765;0;0;0;0;120.61;
Z:\MS_data\7600_ZenoTof\2022\202210\20221012_MS_DC24_VACV_zenoSWATH_thermostability\20221010_MS_zenoSWATH_DC24_VACV_37C_r2-MS_DC24_VACV_zenoSWATH_37C_r2.mzML	20221010_MS_zenoSWATH_DC24_VACV_37C_r2-MS_DC24_VACV_zenoSWATH_37C_r2	37C_r2	Q8K2K6	Q8K2K6	AGFG1_MOUSE	Agfg1	15275.3	8000.62	4149.99	15275.3	8000.62	4149.99	4149.99	AALANLDNI	AALANLDNI	AALANLDNI2	2	0.00206292	0.224533	0.00892857	0.00294985	0.00285714	0.00214592	0.00298507	0	1	310.516	162.637	226.506	489.049	0.853604	29.2614	29.2077	29.3419	53.2123	29.0226	53.7627	Arf-GAP domain and FG repeat-containing protein 1	0.00129282	0.00096432	0.696364	670.437	1.63801	0.0247967	1.69778	0.941928	1.67008	0.132521	251.004;104.543;294.45;101.015;298.038;1560.58;414.27;0;0;0;57.1707;0;
Z:\MS_data\7600_ZenoTof\2022\202210\20221012_MS_DC24_VACV_zenoSWATH_thermostability\20221010_MS_zenoSWATH_DC24_VACV_37C_r3-MS_DC24_VACV_zenoSWATH_37C_r3.mzML	20221010_MS_zenoSWATH_DC24_VACV_37C_r3-MS_DC24_VACV_zenoSWATH_37C_r3	37C_r3	Q8K2K6	Q8K2K6	AGFG1_MOUSE	Agfg1	14479.5	6613.03	1730.53	14479.5	6613.03	1730.53	1730.53	AALANLDNI	AALANLDNI	AALANLDNI2	2	0.00621712	0.661298	0.00892857	0.00310559	0.003003	0.00214592	0.00314465	0	1	26.2901	12.0071	20.0943	410.715	0.697551	29.2885	29.2079	29.3421	53.2123	29.0422	53.7261	Arf-GAP domain and FG repeat-containing protein 1	0.00129282	0.00096432	0.79491	537.354	1.87518	0.148942	0	0.839767	2.00065	0.343847	89.9921;74.4194;281.076;152.908;187.538;805.327;137.085;0;134.818;0;0;0;
Z:\MS_data\7600_ZenoTof\2022\202210\20221012_MS_DC24_VACV_zenoSWATH_thermostability\20221010_MS_zenoSWATH_DC24_VACV_41C_r1-MS_DC24_VACV_zenoSWATH_41C_r1.mzML	20221010_MS_zenoSWATH_DC24_VACV_41C_r1-MS_DC24_VACV_zenoSWATH_41C_r1	41C_r1	Q8K2K6	Q8K2K6	AGFG1_MOUSE	Agfg1	5663.06	2421.63	2770.96	5663.06	2421.63	2770.96	2770.96	AALANLDNI	AALANLDNI	AALANLDNI2	2	0.00293112	0.3048	0.00892857	0.00303951	0.00294118	0.00214592	0.00307692	0	1	427.698	182.892	332.949	998.795	0.730437	29.182	29.1015	29.3967	53.2123	29.0432	53.3598	Arf-GAP domain and FG repeat-containing protein 1	0.00129282	0.00096432	0.601933	1283.03	1.09832	0.266741	0.723788	0.906285	1.74656	0.12889	427.698;175.063;330.458;115.546;754.713;3611.34;567.538;0;0;0;104.102;0;
Z:\MS_data\7600_ZenoTof\2022\202210\20221012_MS_DC24_VACV_zenoSWATH_thermostability\20221010_MS_zenoSWATH_DC24_VACV_41C_r2-MS_DC24_VACV_zenoSWATH_41C_r2.mzML	20221010_MS_zenoSWATH_DC24_VACV_41C_r2-MS_DC24_VACV_zenoSWATH_41C_r2	41C_r2	Q8K2K6	Q8K2K6	AGFG1_MOUSE	Agfg1	7795.42	3672.27	3426.69	7795.42	3672.27	3426.69	3426.69	AALANLDNI	AALANLDNI	AALANLDNI2	2	0.0010543	0.105089	0.00892857	0.00290698	0.0028169	0.00214592	0.00294985	0	1	410.707	193.476	289.834	541.307	0.823211	29.1812	29.1275	29.3422	53.2123	29.0389	53.5045	Arf-GAP domain and FG repeat-containing protein 1	0.00129282	0.00096432	0.804542	767.054	1.46895	0.0888225	0.948867	0.971351	1.92293	0.332074	431.616;378.297;87.6562;18.4504;533.468;1916.9;123.377;0;161.982;0;0;79.2418;
Z:\MS_data\7600_ZenoTof\2022\202210\20221012_MS_DC24_VACV_zenoSWATH_thermostability\20221010_MS_zenoSWATH_DC24_VACV_41C_r3-MS_DC24_VACV_zenoSWATH_41C_r3.mzML	20221010_MS_zenoSWATH_DC24_VACV_41C_r3-MS_DC24_VACV_zenoSWATH_41C_r3	41C_r3	Q8K2K6	Q8K2K6	AGFG1_MOUSE	Agfg1	4806.98	2367.44	2276.39	4806.98	2367.44	2276.39	2276.39	AALANLDNI	AALANLDNI	AALANLDNI2	2	0.00491159	0.433762	0.00892857	0.00284091	0.00275482	0.00214592	0.00288184	0	1	234.363	115.424	179.208	358.171	0.659718	29.3414	29.2341	29.3951	53.2123	29.0606	53.7576	Arf-GAP domain and FG repeat-containing protein 1	0.00129282	0.00096432	0.510261	468.404	1.52568	0.220898	1.73413	0.896457	1.43461	0.279611	192.526;0;148.357;0;0;1703.56;246.755;0;111.678;0;77.8623;0;
Z:\MS_data\7600_ZenoTof\2022\202210\20221012_MS_DC24_VACV_zenoSWATH_thermostability\20221010_MS_zenoSWATH_DC24_VACV_45C_r1-MS_DC24_VACV_zenoSWATH_45C_r1.mzML	20221010_MS_zenoSWATH_DC24_VACV_45C_r1-MS_DC24_VACV_zenoSWATH_45C_r1	45C_r1	Q8K2K6	Q8K2K6	AGFG1_MOUSE	Agfg1	3202.74	1250.23	2052.91	3202.74	1250.23	2052.91	2052.91	AALANLDNI	AALANLDNI	AALANLDNI2	2	0.00410256	0.282061	0.00892857	0.00296736	0.00287356	0.00214592	0.00301205	0	1	603.221	235.475	465.521	861.889	0.666446	29.2616	29.1811	29.3689	53.2123	29.0572	53.5947	Arf-GAP domain and FG repeat-containing protein 1	0.00129282	0.00096432	0.775827	1116.83	1.81065	0.311031	0.582432	0.913996	1.76891	0.309239	438.359;148.839;765.042;134.688;375.077;2617.43;745.746;0;0;0;85.1166;0;
Z:\MS_data\7600_ZenoTof\2022\202210\20221012_MS_DC24_VACV_zenoSWATH_thermostability\20221010_MS_zenoSWATH_DC24_VACV_45C_r2-MS_DC24_VACV_zenoSWATH_45C_r2.mzML	20221010_MS_zenoSWATH_DC24_VACV_45C_r2-MS_DC24_VACV_zenoSWATH_45C_r2	45C_r2	Q8K2K6	Q8K2K6	AGFG1_MOUSE	Agfg1	655.525	433.444	433.444	655.525	433.444	433.444	433.444	AALANLDNI	AALANLDNI	AALANLDNI2	2	0.0127524	0.869236	0.00892857	0.00342466	0.00330033	0.00214592	0.00348432	0	1	175.704	116.178	145.296	425.642	0.507135	29.2082	29.1545	29.2887	53.2123	29.0655	53.505	Arf-GAP domain and FG repeat-containing protein 1	0.00129282	0.00096432	0.575183	514.722	1.0092	0.274059	0.076424	0.840117	1.99118	0.568985	115.233;49.6126;480.252;21.2177;48.9121;1101.14;145.586;0;0;0;207.989;0;
Z:\MS_data\7600_ZenoTof\2022\202210\20221012_MS_DC24_VACV_zenoSWATH_thermostability\20221010_MS_zenoSWATH_DC24_VACV_45C_r3-MS_DC24_VACV_zenoSWATH_45C_r3.mzML	20221010_MS_zenoSWATH_DC24_VACV_45C_r3-MS_DC24_VACV_zenoSWATH_45C_r3	45C_r3	Q8K2K6	Q8K2K6	AGFG1_MOUSE	Agfg1	1761.79	722.067	651.364	1761.79	722.067	651.364	651.364	AALANLDNI	AALANLDNI	AALANLDNI2	2	0.0127119	1	0.00892857	0.00304878	0.00294985	0.00214592	0.00308642	0	1	159.185	65.2418	122.018	946.354	0.846225	29.2351	29.1546	29.3157	53.2123	29.0572	53.5736	Arf-GAP domain and FG repeat-containing protein 1	0.00129282	0.00096432	0.875558	1234.62	2.10729	0.32745	0	0.692104	1.49103	0.457844	111.471;123.856;146.917;0;0;855.223;610.303;0;0;0;0;0;
Z:\MS_data\7600_ZenoTof\2022\202210\20221012_MS_DC24_VACV_zenoSWATH_thermostability\20221010_MS_zenoSWATH_DC24_VACV_49C_r2-MS_DC24_VACV_zenoSWATH_49C_r2.mzML	20221010_MS_zenoSWATH_DC24_VACV_49C_r2-MS_DC24_VACV_zenoSWATH_49C_r2	49C_r2	Q8K2K6	Q8K2K6	AGFG1_MOUSE	Agfg1	203.493	121.688	471.402	203.493	121.688	471.402	471.402	AALANLDNI	AALANLDNI	AALANLDNI2	2	0.0136596	0.872739	0.00892857	0.00815217	0.00803213	0.00214592	0.00823045	0	1	79.2702	47.4031	68.0586	450.377	0.75759	29.2349	29.1812	29.2885	53.2123	29.1242	53.4565	Arf-GAP domain and FG repeat-containing protein 1	0.00129282	0.00096432	0.342769	524.57	1.08483	0.34458	0.0677946	0.819143	1.3214	0.344244	34.6481;74.4199;149.591;67.3432;0;311.814;205.63;0;0;0;35.198;0;
Z:\MS_data\7600_ZenoTof\2022\202210\20221012_MS_DC24_VACV_zenoSWATH_thermostability\20221010_MS_zenoSWATH_DC24_VACV_53C_r1-MS_DC24_VACV_zenoSWATH_53C_r1.mzML	20221010_MS_zenoSWATH_DC24_VACV_53C_r1-MS_DC24_VACV_zenoSWATH_53C_r1	53C_r1	Q8K2K6	Q8K2K6	AGFG1_MOUSE	Agfg1	450.071	350.846	737.386	450.071	350.846	737.386	737.386	AALANLDNI	AALANLDNI	AALANLDNI2	2	0.00900901	0.730711	0.00892857	0.00581395	0.00546448	0.00214592	0.00595238	0	1	156.255	121.806	162.155	369.735	0.827738	29.2357	29.1821	29.2894	53.2123	29.0968	53.6241	Arf-GAP domain and FG repeat-containing protein 1	0.00129282	0.00096432	0.589585	356.282	1.1142	0.00531893	0.981241	0.834062	1.69298	0.434567	9.4069;10.8085;148.149;0;112.523;304.746;149.972;0;12.8279;0;128.421;0;
Z:\MS_data\7600_ZenoTof\2022\202210\20221012_MS_DC24_VACV_zenoSWATH_thermostability\20221010_MS_zenoSWATH_DC24_VACV_53C_r2-MS_DC24_VACV_zenoSWATH_53C_r2.mzML	20221010_MS_zenoSWATH_DC24_VACV_53C_r2-MS_DC24_VACV_zenoSWATH_53C_r2	53C_r2	Q8K2K6	Q8K2K6	AGFG1_MOUSE	Agfg1	193.98	155.854	0	193.98	155.854			AALANLDNI	AALANLDNI	AALANLDNI2	2	0.013986	0.205014	0.00892857	0.0292072	0.0287671	0.00214592	0.0294118	0	1	193.98	155.854	148.07	343.947	0.803919	29.3421	29.2884	29.3958	53.2123	29.1002	53.9546	Arf-GAP domain and FG repeat-containing protein 1	0.00129282	0.00096432	0.498593	450.59	1.72544	0.106143	0.193243	0.944429	1.80783	0.553417	33.5509;171.342;40.7418;0;0;780.757;0;0;0;0;21.1188;0;
Z:\MS_data\7600_ZenoTof\2022\202210\20221012_MS_DC24_VACV_zenoSWATH_thermostability\20221010_MS_zenoSWATH_DC24_VACV_53C_r3-MS_DC24_VACV_zenoSWATH_53C_r3.mzML	20221010_MS_zenoSWATH_DC24_VACV_53C_r3-MS_DC24_VACV_zenoSWATH_53C_r3	53C_r3	Q8K2K6	Q8K2K6	AGFG1_MOUSE	Agfg1	243.047	361.633	0	243.047	361.633			AALANLDNI	AALANLDNI	AALANLDNI2	2	0.011213	0.671779	0.00892857	0.0241546	0.0237342	0.00214592	0.0227642	0	1	243.047	361.633	271.356	131.735	0.815263	29.3691	29.3154	29.4228	53.2123	29.0658	54.1979	Arf-GAP domain and FG repeat-containing protein 1	0.00129282	0.00096432	0.212181	117.992	1.06008	0.217349	0.525293	0.869964	1.53947	0.713824	0;154.156;118.521;0;386.989;266.954;0;0;0;0;0;0;
Z:\MS_data\7600_ZenoTof\2022\202210\20221012_MS_DC24_VACV_zenoSWATH_thermostability\20221010_MS_zenoSWATH_DC24_VACV_37C_r1-MS_DC24_VACV_zenoSWATH_37C_r1.mzML	20221010_MS_zenoSWATH_DC24_VACV_37C_r1-MS_DC24_VACV_zenoSWATH_37C_r1	37C_r1	Q8CG47	Q8CG47	SMC4_MOUSE	Smc4	1317.93	493.402	493.402	1317.93	493.402	493.402	493.402	AALDFKNV	AALDFKNV	AALDFKNV2	2	0.000286556	0.000286556	0.00320256	0.00535332	0.00529101	0.0112867	0.00539374	0	1	1317.93	493.402	963.231	1148.14	0.6813	22.5247	22.3636	22.6053	28.1765	22.5659	28.0005	Structural maintenance of chromosomes protein 4	0.000750188	0.00096432	0.774962	1570.93	2.39734	0.373357	1.73404	0.999907	0	-10000000	1275.82;0;431.989;793.47;168.695;157.017;0;758.248;0;249.861;27.1453;183.438;
Z:\MS_data\7600_ZenoTof\2022\202210\20221012_MS_DC24_VACV_zenoSWATH_thermostability\20221010_MS_zenoSWATH_DC24_VACV_37C_r2-MS_DC24_VACV_zenoSWATH_37C_r2.mzML	20221010_MS_zenoSWATH_DC24_VACV_37C_r2-MS_DC24_VACV_zenoSWATH_37C_r2	37C_r2	Q8CG47	Q8CG47	SMC4_MOUSE	Smc4	683.229	357.849	357.849	683.229	357.849	357.849	357.849	AALDFKNV	AALDFKNV	AALDFKNV2	2	0.000323469	0.000323469	0.00320256	0.00538793	0.00532481	0.0112867	0.00542299	0	1	683.229	357.849	498.38	419.159	0.777398	22.4701	22.4165	22.5238	28.1765	22.5182	27.9502	Structural maintenance of chromosomes protein 4	0.000750188	0.00096432	0.726579	574.625	2.62642	0.556814	0.808503	0.999911	0	-10000000	1221.09;0;174.296;313.987;192.367;105.498;83.4521;272.553;0;0;0;279.095;
Z:\MS_data\7600_ZenoTof\2022\202210\20221012_MS_DC24_VACV_zenoSWATH_thermostability\20221010_MS_zenoSWATH_DC24_VACV_37C_r3-MS_DC24_VACV_zenoSWATH_37C_r3.mzML	20221010_MS_zenoSWATH_DC24_VACV_37C_r3-MS_DC24_VACV_zenoSWATH_37C_r3	37C_r3	Q8CG47	Q8CG47	SMC4_MOUSE	Smc4	1618.85	739.353	739.353	1618.85	739.353	739.353	739.353	AALDFKNV	AALDFKNV	AALDFKNV2	2	0.000596659	0.000954242	0.00320256	0.00554939	0.00548246	0.0112867	0.00447427	0	1	1618.85	739.353	1237.33	510.125	0.855312	22.5241	22.4436	22.6314	28.1765	22.5736	27.947	Structural maintenance of chromosomes protein 4	0.000750188	0.00096432	0.701533	667.416	2.87128	0.358102	1.52997	0.999725	0	-10000000	769.989;0;239.16;982.072;431.143;0;247.854;210.519;28.3208;64.8283;0;87.1932;
Z:\MS_data\7600_ZenoTof\2022\202210\20221012_MS_DC24_VACV_zenoSWATH_thermostability\20221010_MS_zenoSWATH_DC24_VACV_41C_r1-MS_DC24_VACV_zenoSWATH_41C_r1.mzML	20221010_MS_zenoSWATH_DC24_VACV_41C_r1-MS_DC24_VACV_zenoSWATH_41C_r1	41C_r1	Q8CG47	Q8CG47	SMC4_MOUSE	Smc4	2360.14	1009.24	1009.24	2360.14	1009.24	1009.24	1009.24	AALDFKNV	AALDFKNV	AALDFKNV2	2	0.000266197	0.000266197	0.00320256	0.00638978	0.00631579	0.0112867	0.00643777	0	1	2360.14	1009.24	1837.29	1373.46	0.774617	22.4711	22.337	22.6054	28.1765	22.5509	27.8655	Structural maintenance of chromosomes protein 4	0.000750188	0.00096432	0.780838	1764.32	2.28852	0.393541	1.02024	0.99991	0	-10000000	1744.77;105.6;366.684;1105.86;213.691;0;0;162.777;85.8552;318.2;73.716;208.041;
Z:\MS_data\7600_ZenoTof\2022\202210\20221012_MS_DC24_VACV_zenoSWATH_thermostability\20221010_MS_zenoSWATH_DC24_VACV_41C_r2-MS_DC24_VACV_zenoSWATH_41C_r2.mzML	20221010_MS_zenoSWATH_DC24_VACV_41C_r2-MS_DC24_VACV_zenoSWATH_41C_r2	41C_r2	Q8CG47	Q8CG47	SMC4_MOUSE	Smc4	1529.98	720.742	720.742	1529.98	720.742	720.742	720.742	AALDFKNV	AALDFKNV	AALDFKNV2	2	0.00066313	0.00346208	0.00320256	0.00618557	0.00612245	0.0112867	0.00623053	0	1	1529.98	720.742	1079.7	1043.83	0.681472	22.524	22.3092	22.6045	28.1765	22.5459	28.0717	Structural maintenance of chromosomes protein 4	0.000750188	0.00096432	0.800036	1479.16	2.20402	0.476876	1.87147	0.999029	0	-10000000	1094.99;0;251.958;1304.3;273.891;70.5839;168.852;305.818;96.3364;58.8858;0;163.953;
Z:\MS_data\7600_ZenoTof\2022\202210\20221012_MS_DC24_VACV_zenoSWATH_thermostability\20221010_MS_zenoSWATH_DC24_VACV_41C_r3-MS_DC24_VACV_zenoSWATH_41C_r3.mzML	20221010_MS_zenoSWATH_DC24_VACV_41C_r3-MS_DC24_VACV_zenoSWATH_41C_r3	41C_r3	Q8CG47	Q8CG47	SMC4_MOUSE	Smc4	1438.99	708.701	708.701	1438.99	708.701	708.701	708.701	AALDFKNV	AALDFKNV	AALDFKNV2	2	0.000596303	0.0230346	0.00320256	0.00448431	0.00442968	0.0112867	0.00451977	0	1	1438.99	708.701	1100.34	682.715	0.684591	22.4699	22.3357	22.631	28.1765	22.5511	27.8371	Structural maintenance of chromosomes protein 4	0.000750188	0.00096432	0.814001	892.833	1.91877	0.405645	1.68431	0.993904	0	-10000000	1408.52;0;400.217;1173.06;93.1275;214.391;0;410.513;0;121.551;73.7152;45.8591;
Z:\MS_data\7600_ZenoTof\2022\202210\20221012_MS_DC24_VACV_zenoSWATH_thermostability\20221010_MS_zenoSWATH_DC24_VACV_45C_r1-MS_DC24_VACV_zenoSWATH_45C_r1.mzML	20221010_MS_zenoSWATH_DC24_VACV_45C_r1-MS_DC24_VACV_zenoSWATH_45C_r1	45C_r1	Q8CG47	Q8CG47	SMC4_MOUSE	Smc4	2957.49	1154.49	1154.49	2957.49	1154.49	1154.49	1154.49	AALDFKNV	AALDFKNV	AALDFKNV2	2	0.000468897	0.000468897	0.00320256	0.00445434	0.00440044	0.0112867	0.00448934	0	1	2957.49	1154.49	2282.37	826.225	0.817919	22.4704	22.3899	22.6314	28.1765	22.5504	27.863	Structural maintenance of chromosomes protein 4	0.000750188	0.00096432	0.902845	1070.62	3.37718	0.516792	1.22797	0.999844	0	-10000000	818.374;203.767;996.791;1783.24;174.025;0;125.178;326.492;0;199.614;0;139.746;
Z:\MS_data\7600_ZenoTof\2022\202210\20221012_MS_DC24_VACV_zenoSWATH_thermostability\20221010_MS_zenoSWATH_DC24_VACV_45C_r2-MS_DC24_VACV_zenoSWATH_45C_r2.mzML	20221010_MS_zenoSWATH_DC24_VACV_45C_r2-MS_DC24_VACV_zenoSWATH_45C_r2	45C_r2	Q8CG47	Q8CG47	SMC4_MOUSE	Smc4	633.607	418.951	418.951	633.607	418.951	418.951	418.951	AALDFKNV	AALDFKNV	AALDFKNV2	2	0.000761615	0.0038402	0.00320256	0.00764331	0.00754717	0.0112867	0.00771208	0	1	633.607	418.951	523.952	415.08	0.655683	22.5512	22.417	22.6049	28.1765	22.5363	28.2241	Structural maintenance of chromosomes protein 4	0.000750188	0.00096432	0.346926	501.949	1.92397	0.438523	0.862943	0.99916	0	-10000000	686.421;105.601;336.458;346.66;37.157;23.0244;0;110.523;0;165.31;0;20.2725;
Z:\MS_data\7600_ZenoTof\2022\202210\20221012_MS_DC24_VACV_zenoSWATH_thermostability\20221010_MS_zenoSWATH_DC24_VACV_45C_r3-MS_DC24_VACV_zenoSWATH_45C_r3.mzML	20221010_MS_zenoSWATH_DC24_VACV_45C_r3-MS_DC24_VACV_zenoSWATH_45C_r3	45C_r3	Q8CG47	Q8CG47	SMC4_MOUSE	Smc4	248.546	101.866	101.866	248.546	101.866	101.866	101.866	AALDFKNV	AALDFKNV	AALDFKNV2	2	0.000587889	0.000933816	0.00320256	0.00461894	0.004561	0.0112867	0.00465116	0	1	248.546	101.866	190.515	744.642	0.60767	22.5242	22.3364	22.5779	28.1765	22.5538	28.0097	Structural maintenance of chromosomes protein 4	0.000750188	0.00096432	0.424597	971.463	2.29359	0.354094	0.879883	0.99971	0	-10000000	769.75;136.649;296.524;1187.41;138.436;0;166.904;382.131;0;330.624;0;253.704;
Z:\MS_data\7600_ZenoTof\2022\202210\20221012_MS_DC24_VACV_zenoSWATH_thermostability\20221010_MS_zenoSWATH_DC24_VACV_49C_r2-MS_DC24_VACV_zenoSWATH_49C_r2.mzML	20221010_MS_zenoSWATH_DC24_VACV_49C_r2-MS_DC24_VACV_zenoSWATH_49C_r2	49C_r2	Q8CG47	Q8CG47	SMC4_MOUSE	Smc4	556.9	333.022	333.022	556.9	333.022	333.022	333.022	AALDFKNV	AALDFKNV	AALDFKNV2	2	0.000857633	0.00408542	0.00320256	0.00815217	0.00803213	0.0112867	0.00823045	0	1	556.9	333.022	478.135	521.377	0.488315	22.5509	22.4436	22.6046	28.1765	22.5689	28.1501	Structural maintenance of chromosomes protein 4	0.000750188	0.00096432	0.393881	607.266	2.29852	0.356488	1.28882	0.998968	0	-10000000	371.19;0;218.202;722.007;76.666;13.9657;16.4123;106.764;0;121.553;0;55.8967;
Z:\MS_data\7600_ZenoTof\2022\202210\20221012_MS_DC24_VACV_zenoSWATH_thermostability\20221010_MS_zenoSWATH_DC24_VACV_49C_r3-MS_DC24_VACV_zenoSWATH_49C_r3.mzML	20221010_MS_zenoSWATH_DC24_VACV_49C_r3-MS_DC24_VACV_zenoSWATH_49C_r3	49C_r3	Q8CG47	Q8CG47	SMC4_MOUSE	Smc4	373.622	288.527	288.527	373.622	288.527	288.527	288.527	AALDFKNV	AALDFKNV	AALDFKNV2	2	0.00312744	0.305536	0.00320256	0.00857143	0.00843882	0.0112867	0.00865801	0	1	373.622	288.527	295.968	345.585	0.746059	22.4712	22.3907	22.5249	28.1765	22.5656	27.8297	Structural maintenance of chromosomes protein 4	0.000750188	0.00096432	0.822973	436.257	1.85282	0.00412712	0	0.935118	0	-10000000	313.516;0;32.4323;364.192;0;0;0;80.0731;0;0;0;0;
Z:\MS_data\7600_ZenoTof\2022\202210\20221012_MS_DC24_VACV_zenoSWATH_thermostability\20221010_MS_zenoSWATH_DC24_VACV_53C_r2-MS_DC24_VACV_zenoSWATH_53C_r2.mzML	20221010_MS_zenoSWATH_DC24_VACV_53C_r2-MS_DC24_VACV_zenoSWATH_53C_r2	53C_r2	Q8CG47	Q8CG47	SMC4_MOUSE	Smc4	106.455	85.5318	85.5318	106.455	85.5318	85.5318	85.5318	AALDFKNV	AALDFKNV	AALDFKNV2	2	0.00102775	0.0460629	0.00320256	0.0103448	0.0101868	0.0112867	0.0104348	0	1	106.455	85.5318	81.2599	158.746	-0.0475814	22.5241	22.4704	22.5778	28.1765	22.5447	28.1203	Structural maintenance of chromosomes protein 4	0.000750188	0.00096432	0.293539	207.966	1.04161	0.375083	0	0.986952	0	-10000000	296.659;27.8873;127.081;448.134;0;0;0;0;0;0;0;0;
Z:\MS_data\7600_ZenoTof\2022\202210\20221012_MS_DC24_VACV_zenoSWATH_thermostability\20221010_MS_zenoSWATH_DC24_VACV_37C_r1-MS_DC24_VACV_zenoSWATH_37C_r1.mzML	20221010_MS_zenoSWATH_DC24_VACV_37C_r1-MS_DC24_VACV_zenoSWATH_37C_r1	37C_r1	Q60864	Q60864	STIP1_MOUSE	Stip1	515.6	193.029	193.029	515.6	193.029	193.029	193.029	AALEFLNRF	AALEFLNRF	AALEFLNRF2	2	0.000590319	0.00915905	0.0276873	0.0147783	0.0146461	0.0416988	0.0148637	0	1	515.6	193.029	376.836	71.4237	0.877028	34.7683	34.7146	34.8488	74.7724	34.7409	74.9004	Stress-induced-phosphoprotein 1	0.00390843	0.00624025	0	97.7243	1.65413	0.473964	0.477648	0.997025	0.653704	0.0594936	289.257;253.289;154.739;0;203.364;37.9411;0;0;0;0;0;0;
Z:\MS_data\7600_ZenoTof\2022\202210\20221012_MS_DC24_VACV_zenoSWATH_thermostability\20221010_MS_zenoSWATH_DC24_VACV_45C_r1-MS_DC24_VACV_zenoSWATH_45C_r1.mzML	20221010_MS_zenoSWATH_DC24_VACV_45C_r1-MS_DC24_VACV_zenoSWATH_45C_r1	45C_r1	Q60864	Q60864	STIP1_MOUSE	Stip1	1005.28	392.423	392.423	1005.28	392.423	392.423	392.423	AALEFLNRF	AALEFLNRF	AALEFLNRF2	2	0.00062461	0.00295056	0.0276873	0.016184	0.0160338	0.0416988	0.016295	0	1	1005.28	392.423	775.799	220.449	0.883105	34.7938	34.7401	34.8743	74.7724	34.7165	74.9139	Stress-induced-phosphoprotein 1	0.00390843	0.00624025	0.742849	285.658	2.29965	0.566238	0.738936	0.999017	0	-10000000	381.283;729.464;0;0;42.7599;0;54.6011;0;39.0972;0;0;0;
Z:\MS_data\7600_ZenoTof\2022\202210\20221012_MS_DC24_VACV_zenoSWATH_thermostability\20221010_MS_zenoSWATH_DC24_VACV_49C_r2-MS_DC24_VACV_zenoSWATH_49C_r2.mzML	20221010_MS_zenoSWATH_DC24_VACV_49C_r2-MS_DC24_VACV_zenoSWATH_49C_r2	49C_r2	Q60864	Q60864	STIP1_MOUSE	Stip1	118.985	71.1521	71.1522	118.985	71.1521	71.1522	71.1522	AALEFLNRF	AALEFLNRF	AALEFLNRF2	2	0.00222222	0.12196	0.0276873	0.0158259	0.0156556	0.0416988	0.0159521	0	1	118.985	71.1521	102.156	17.0154	0.801784	34.8209	34.7673	34.8746	74.7724	34.7352	75.1071	Stress-induced-phosphoprotein 1	0.00390843	0.00624025	0.32598	19.8184	1.39339	0.122919	0	0.97007	0	-10000000	0;114.26;33.2897;0;0;0;0;0;0;0;0;0;
Z:\MS_data\7600_ZenoTof\2022\202210\20221012_MS_DC24_VACV_zenoSWATH_thermostability\20221010_MS_zenoSWATH_DC24_VACV_69C_r1-MS_DC24_VACV_zenoSWATH_69C_r1.mzML	20221010_MS_zenoSWATH_DC24_VACV_69C_r1-MS_DC24_VACV_zenoSWATH_69C_r1	69C_r1	Q60864	Q60864	STIP1_MOUSE	Stip1	533.855	616.606	0	533.855	616.606			AALEFLNRF	AALEFLNRF	AALEFLNRF2	2	0.025974	0.257711	0.0276873	0.0898876	0.09	0.0416988	0.091954	0	1	533.855	616.606	388.483	371.65	0.783384	34.7409	34.6604	34.8482	74.7724	34.6263	74.897	Stress-induced-phosphoprotein 1	0.00390843	0.00624025	0.799902	510.722	2.42496	0.391532	0.485096	0.794607	0.855342	0.485559	402.738;357.98;502.795;0;313.847;195.036;0;151.165;40.2269;0;0;22.7003;
Z:\MS_data\7600_ZenoTof\2022\202210\20221012_MS_DC24_VACV_zenoSWATH_thermostability\20221010_MS_zenoSWATH_DC24_VACV_69C_r2-MS_DC24_VACV_zenoSWATH_69C_r2.mzML	20221010_MS_zenoSWATH_DC24_VACV_69C_r2-MS_DC24_VACV_zenoSWATH_69C_r2	69C_r2	Q60864	Q60864	STIP1_MOUSE	Stip1	1324.8	1293.93	1293.93	1324.8	1293.93	1293.93	1293.93	AALEFLNRF	AALEFLNRF	AALEFLNRF2	2	0.00913242	0.353729	0.0276873	0.0882353	0.0884354	0.0416988	0.0820896	0	1	1324.8	1293.93	844.684	557.439	0.597232	34.7398	34.5519	34.8471	74.7724	34.6476	75.1284	Stress-induced-phosphoprotein 1	0.00390843	0.00624025	0.617755	874.283	1.51964	0.033016	0.118438	0.783347	0	-10000000	1324.8;229.647;50.9674;0;66.6971;237.833;852.085;103.819;98.9866;0;0;113.1;
Z:\MS_data\7600_ZenoTof\2022\202210\20221012_MS_DC24_VACV_zenoSWATH_thermostability\20221010_MS_zenoSWATH_DC24_VACV_73C_r3-MS_DC24_VACV_zenoSWATH_73C_r3.mzML	20221010_MS_zenoSWATH_DC24_VACV_73C_r3-MS_DC24_VACV_zenoSWATH_73C_r3	73C_r3	Q60864	Q60864	STIP1_MOUSE	Stip1	516.992	808.077	0	516.992	808.077			AALEFLNRF	AALEFLNRF	AALEFLNRF2	2	0.0181818	0.322414	0.0276873	0.0972222	0.0963855	0.0416988	0.0985916	0	1	516.992	808.077	378.407	312.793	0.46767	34.7414	34.6878	34.8219	74.7724	34.5666	75.4347	Stress-induced-phosphoprotein 1	0.00390843	0.00624025	0.789348	427.348	2.90287	0.262119	1.39305	0.751544	1.05001	0.470674	739.04;242.593;257.135;228.069;93.0889;151.449;104.011;119.105;327.696;0;0;113.101;
Z:\MS_data\7600_ZenoTof\2022\202210\20221012_MS_DC24_VACV_zenoSWATH_thermostability\20221010_MS_zenoSWATH_DC24_VACV_37C_r1-MS_DC24_VACV_zenoSWATH_37C_r1.mzML	20221010_MS_zenoSWATH_DC24_VACV_37C_r1-MS_DC24_VACV_zenoSWATH_37C_r1	37C_r1	P61965	P61965	WDR5_MOUSE	Wdr5	694.667	260.068	260.068	694.667	260.068	260.068	260.068	AALENDKTI	AALENDKTI	AALENDKTI2	2	0.000590319	0.0170423	0.00320256	0.00535332	0.00529101	0.0112867	0.00539374	0	1	694.667	260.068	507.71	825.045	0.575164	13.5884	13.5078	13.7494	-6.24841	13.5764	-6.16562	WD repeat-containing protein 5	0.000750188	0.00174825	0.640244	1128.86	1.46626	0.319704	0.2072	0.994479	0	-10000000	571.167;622.603;488.088;108.178;258.758;0;0;0;618.458;0;0;0;
Z:\MS_data\7600_ZenoTof\2022\202210\20221012_MS_DC24_VACV_zenoSWATH_thermostability\20221010_MS_zenoSWATH_DC24_VACV_37C_r2-MS_DC24_VACV_zenoSWATH_37C_r2.mzML	20221010_MS_zenoSWATH_DC24_VACV_37C_r2-MS_DC24_VACV_zenoSWATH_37C_r2	37C_r2	P61965	P61965	WDR5_MOUSE	Wdr5	358.85	187.952	187.952	358.85	187.952	187.952	187.952	AALENDKTI	AALENDKTI	AALENDKTI2	2	0.00158983	0.147665	0.00320256	0.00538793	0.00532481	0.0112867	0.00542299	0	1	358.85	187.952	261.763	806.397	0.683645	13.5613	13.4808	13.6955	-6.24841	13.4949	-5.95671	WD repeat-containing protein 5	0.000750188	0.00174825	0.680648	1105.49	1.31759	0.245017	0.813995	0.961034	0	-10000000	529.655;451.72;211.966;86.6997;442.723;0;0;0;510.925;0;0;0;
Z:\MS_data\7600_ZenoTof\2022\202210\20221012_MS_DC24_VACV_zenoSWATH_thermostability\20221010_MS_zenoSWATH_DC24_VACV_41C_r1-MS_DC24_VACV_zenoSWATH_41C_r1.mzML	20221010_MS_zenoSWATH_DC24_VACV_41C_r1-MS_DC24_VACV_zenoSWATH_41C_r1	41C_r1	P61965	P61965	WDR5_MOUSE	Wdr5	473.13	202.32	202.32	473.13	202.32	202.32	202.32	AALENDKTI	AALENDKTI	AALENDKTI2	2	0.000600601	0.0124956	0.00320256	0.00638978	0.00631579	0.0112867	0.00643777	0	1	473.13	202.32	368.317	586.753	0.738465	13.6158	13.5352	13.6963	-6.24841	13.5689	-6.01471	WD repeat-containing protein 5	0.000750188	0.00174825	0.757752	753.728	1.68414	0.281477	1.69702	0.995779	0	-10000000	426.929;172.786;208.294;0;1345.37;105.751;0;109.201;508.084;107.292;0;0;
Z:\MS_data\7600_ZenoTof\2022\202210\20221012_MS_DC24_VACV_zenoSWATH_thermostability\20221010_MS_zenoSWATH_DC24_VACV_41C_r2-MS_DC24_VACV_zenoSWATH_41C_r2.mzML	20221010_MS_zenoSWATH_DC24_VACV_41C_r2-MS_DC24_VACV_zenoSWATH_41C_r2	41C_r2	P61965	P61965	WDR5_MOUSE	Wdr5	1625.98	765.967	765.967	1625.98	765.967	765.967	765.967	AALENDKTI	AALENDKTI	AALENDKTI2	2	0.00066313	0.00689038	0.00320256	0.00618557	0.00612245	0.0112867	0.00623053	0	1	1625.98	765.967	1147.45	973.575	0.792883	13.5614	13.5077	13.7224	-6.24841	13.5564	-6.18651	WD repeat-containing protein 5	0.000750188	0.00174825	0.89525	1379.6	2.07678	0.529797	1.47135	0.99807	0	-10000000	994.155;513.602;504.768;28.8479;412.328;0;0;109.201;207.104;22.6863;0;0;
Z:\MS_data\7600_ZenoTof\2022\202210\20221012_MS_DC24_VACV_zenoSWATH_thermostability\20221010_MS_zenoSWATH_DC24_VACV_45C_r1-MS_DC24_VACV_zenoSWATH_45C_r1.mzML	20221010_MS_zenoSWATH_DC24_VACV_45C_r1-MS_DC24_VACV_zenoSWATH_45C_r1	45C_r1	P61965	P61965	WDR5_MOUSE	Wdr5	1131.43	441.669	441.669	1131.43	441.669	441.669	441.669	AALENDKTI	AALENDKTI	AALENDKTI2	2	0.00062461	0.000757206	0.00320256	0.00445434	0.00440044	0.0112867	0.00448934	0	1	1131.43	441.669	873.156	1006.06	0.91282	13.615	13.5076	13.7492	-6.24841	13.5898	-6.08924	WD repeat-containing protein 5	0.000750188	0.00174825	0.905438	1303.66	2.41531	0.325601	1.80087	0.999747	0	-10000000	927.423;327.961;266.514;136.556;726.281;0;0;0;786.02;26.1559;0;86.8582;
Z:\MS_data\7600_ZenoTof\2022\202210\20221012_MS_DC24_VACV_zenoSWATH_thermostability\20221010_MS_zenoSWATH_DC24_VACV_45C_r2-MS_DC24_VACV_zenoSWATH_45C_r2.mzML	20221010_MS_zenoSWATH_DC24_VACV_45C_r2-MS_DC24_VACV_zenoSWATH_45C_r2	45C_r2	P61965	P61965	WDR5_MOUSE	Wdr5	73.0484	48.3008	48.3008	73.0484	48.3008	48.3008	48.3008	AALENDKTI	AALENDKTI	AALENDKTI2	2	0.00208914	0.101759	0.00320256	0.00823529	0.00813008	0.0112867	0.00830368	0	1	73.0484	48.3008	60.4063	575.692	0.768021	13.6152	13.5616	13.6958	-6.24841	13.5441	-5.95898	WD repeat-containing protein 5	0.000750188	0.00174825	0.625395	696.175	1.91102	0.325331	1.60219	0.978206	0	-10000000	295.83;174.452;189.641;85.9154;478.525;0;0;94.5892;0;0;0;0;
Z:\MS_data\7600_ZenoTof\2022\202210\20221012_MS_DC24_VACV_zenoSWATH_thermostability\20221010_MS_zenoSWATH_DC24_VACV_45C_r3-MS_DC24_VACV_zenoSWATH_45C_r3.mzML	20221010_MS_zenoSWATH_DC24_VACV_45C_r3-MS_DC24_VACV_zenoSWATH_45C_r3	45C_r3	P61965	P61965	WDR5_MOUSE	Wdr5	404.305	165.703	165.703	404.305	165.703	165.703	165.703	AALENDKTI	AALENDKTI	AALENDKTI2	2	0.000587889	0.0176363	0.00320256	0.00461894	0.004561	0.0112867	0.00465116	0	1	404.305	165.703	309.907	849.696	0.790738	13.669	13.5616	13.7495	-6.24841	13.5577	-5.83796	WD repeat-containing protein 5	0.000750188	0.00174825	0.798719	1108.52	2.60803	0.214799	1.94386	0.994559	0	-10000000	997.831;394.841;157.421;148.941;560.504;0;0;0;492.156;78.7344;0;0;
Z:\MS_data\7600_ZenoTof\2022\202210\20221012_MS_DC24_VACV_zenoSWATH_thermostability\20221010_MS_zenoSWATH_DC24_VACV_49C_r1-MS_DC24_VACV_zenoSWATH_49C_r1.mzML	20221010_MS_zenoSWATH_DC24_VACV_49C_r1-MS_DC24_VACV_zenoSWATH_49C_r1	49C_r1	P61965	P61965	WDR5_MOUSE	Wdr5	348.967	260.086	260.086	348.967	260.086	260.086	260.086	AALENDKTI	AALENDKTI	AALENDKTI2	2	0.000897666	0.0920827	0.00320256	0.00934579	0.00920245	0.0112867	0.00941915	0	1	348.967	260.086	273.781	215.384	0.815594	13.616	13.5624	13.6698	-6.24841	13.529	-5.90881	WD repeat-containing protein 5	0.000750188	0.00174825	0.369139	274.534	1.87893	0.487246	0.366743	0.975247	0	-10000000	155.535;243.234;46.633;0;85.1854;0;0;0;45.5169;0;0;0;
Z:\MS_data\7600_ZenoTof\2022\202210\20221012_MS_DC24_VACV_zenoSWATH_thermostability\20221010_MS_zenoSWATH_DC24_VACV_49C_r2-MS_DC24_VACV_zenoSWATH_49C_r2.mzML	20221010_MS_zenoSWATH_DC24_VACV_49C_r2-MS_DC24_VACV_zenoSWATH_49C_r2	49C_r2	P61965	P61965	WDR5_MOUSE	Wdr5	508.369	304.001	304.001	508.369	304.001	304.001	304.001	AALENDKTI	AALENDKTI	AALENDKTI2	2	0.000857633	0.00409959	0.00320256	0.00815217	0.00803213	0.0112867	0.00823045	0	1	508.369	304.001	436.467	809.455	0.768273	13.6151	13.5614	13.6956	-6.24841	13.5826	-6.11667	WD repeat-containing protein 5	0.000750188	0.00174825	0.628932	942.8	2.62222	0.575773	1.63726	0.998964	0	-10000000	469.754;327.721;84.7866;73.3729;312.949;0;0;0;328.292;280.239;0;0;
Z:\MS_data\7600_ZenoTof\2022\202210\20221012_MS_DC24_VACV_zenoSWATH_thermostability\20221010_MS_zenoSWATH_DC24_VACV_49C_r3-MS_DC24_VACV_zenoSWATH_49C_r3.mzML	20221010_MS_zenoSWATH_DC24_VACV_49C_r3-MS_DC24_VACV_zenoSWATH_49C_r3	49C_r3	P61965	P61965	WDR5_MOUSE	Wdr5	87.4874	67.5615	67.5615	87.4874	67.5615	67.5615	67.5615	AALENDKTI	AALENDKTI	AALENDKTI2	2	0.00383142	0.344759	0.00320256	0.00857143	0.00843882	0.0112867	0.00865801	0	1	87.4874	67.5615	69.3039	302.132	0.801784	13.6152	13.5614	13.6689	-6.24841	13.547	-5.96938	WD repeat-containing protein 5	0.000750188	0.00174825	0.66096	381.404	1.77914	0.0823111	1.62229	0.927393	0	-10000000	116.65;0;86.2002;27.5933;0;0;0;0;282.488;0;0;0;
Z:\MS_data\7600_ZenoTof\2022\202210\20221012_MS_DC24_VACV_zenoSWATH_thermostability\20221010_MS_zenoSWATH_DC24_VACV_53C_r1-MS_DC24_VACV_zenoSWATH_53C_r1.mzML	20221010_MS_zenoSWATH_DC24_VACV_53C_r1-MS_DC24_VACV_zenoSWATH_53C_r1	53C_r1	P61965	P61965	WDR5_MOUSE	Wdr5	174.439	135.981	135.981	174.439	135.981	135.981	135.981	AALENDKTI	AALENDKTI	AALENDKTI2	2	0.000898473	0.0436964	0.00320256	0.00739372	0.00724638	0.0112867	0.00747664	0	1	174.439	135.981	181.026	508.958	0.717214	13.5886	13.5349	13.6423	-6.24841	13.5546	-6.06081	WD repeat-containing protein 5	0.000750188	0.00174825	0.608051	490.439	2.2609	0.265796	1.17744	0.988243	0	-10000000	336.815;104.242;0;87.1706;280.352;0;0;18.0721;0;0;0;0;
Z:\MS_data\7600_ZenoTof\2022\202210\20221012_MS_DC24_VACV_zenoSWATH_thermostability\20221010_MS_zenoSWATH_DC24_VACV_53C_r2-MS_DC24_VACV_zenoSWATH_53C_r2.mzML	20221010_MS_zenoSWATH_DC24_VACV_53C_r2-MS_DC24_VACV_zenoSWATH_53C_r2	53C_r2	P61965	P61965	WDR5_MOUSE	Wdr5	1120.84	900.546	900.547	1120.84	900.546	900.547	900.547	AALENDKTI	AALENDKTI	AALENDKTI2	2	0.00102775	0.00438666	0.00320256	0.0103448	0.0101868	0.0112867	0.0104348	0	1	1120.84	900.546	855.568	765.41	0.783843	13.6418	13.5344	13.7223	-6.24841	13.5711	-5.95202	WD repeat-containing protein 5	0.000750188	0.00174825	0.887817	1002.73	2.67544	0.546045	1.19772	0.998743	0	-10000000	662.596;419.352;563.835;29.0042;488.716;0;0;132.271;269.971;0;0;0;
Z:\MS_data\7600_ZenoTof\2022\202210\20221012_MS_DC24_VACV_zenoSWATH_thermostability\20221010_MS_zenoSWATH_DC24_VACV_37C_r1-MS_DC24_VACV_zenoSWATH_37C_r1.mzML	20221010_MS_zenoSWATH_DC24_VACV_37C_r1-MS_DC24_VACV_zenoSWATH_37C_r1	37C_r1	Q9D906	Q9D906	ATG7_MOUSE	Atg7	4484.12	1678.75	1678.75	4484.12	1678.75	1678.75	1678.75	AALENPM(UniMod:35)LL	AALENPMLL	AALENPM(UniMod:35)LL2	2	0.000590319	0.00733625	0.00320256	0.00535332	0.00529101	0.0112867	0.00539374	0	1	4484.12	1678.75	3277.3	3013.01	0.563991	29.1028	28.9955	29.3175	53.4026	29.1337	53.3837	Ubiquitin-like modifier-activating enzyme ATG7	0.000750188	0.00096432	0.352874	4122.51	1.63997	0.216952	3.26833	0.997616	0.758259	0.197636	1645.93;2071.4;5505.04;732.942;172.452;467.401;0;1009.7;1576.95;892.889;0;0;
Z:\MS_data\7600_ZenoTof\2022\202210\20221012_MS_DC24_VACV_zenoSWATH_thermostability\20221010_MS_zenoSWATH_DC24_VACV_37C_r2-MS_DC24_VACV_zenoSWATH_37C_r2.mzML	20221010_MS_zenoSWATH_DC24_VACV_37C_r2-MS_DC24_VACV_zenoSWATH_37C_r2	37C_r2	Q9D906	Q9D906	ATG7_MOUSE	Atg7	1370.51	717.819	717.819	1370.51	717.819	717.819	717.819	AALENPM(UniMod:35)LL	AALENPMLL	AALENPM(UniMod:35)LL2	2	0.00303797	0.262638	0.00320256	0.00836431	0.00827967	0.0112867	0.00841121	0	1	1370.51	717.819	999.714	689.277	0.927794	29.0748	28.9943	29.1553	53.4026	29.0908	53.3077	Ubiquitin-like modifier-activating enzyme ATG7	0.000750188	0.00096432	0.582654	944.93	1.46863	0.358405	1.57839	0.932735	0	-10000000	183.633;495.944;1102.43;247.397;406.422;53.1031;0;287.054;487.901;281.508;0;137.737;
Z:\MS_data\7600_ZenoTof\2022\202210\20221012_MS_DC24_VACV_zenoSWATH_thermostability\20221010_MS_zenoSWATH_DC24_VACV_37C_r3-MS_DC24_VACV_zenoSWATH_37C_r3.mzML	20221010_MS_zenoSWATH_DC24_VACV_37C_r3-MS_DC24_VACV_zenoSWATH_37C_r3	37C_r3	Q9D906	Q9D906	ATG7_MOUSE	Atg7	678.874	310.052	310.052	678.874	310.052	310.052	310.052	AALENPM(UniMod:35)LL	AALENPMLL	AALENPM(UniMod:35)LL2	2	0.000596659	0.0170016	0.00320256	0.00554939	0.00548246	0.0112867	0.00447427	0	1	678.874	310.052	518.882	1950.32	0.217399	29.1287	29.0482	29.3434	53.4026	29.1206	53.3994	Ubiquitin-like modifier-activating enzyme ATG7	0.000750188	0.00096432	0.557685	2551.68	1.57804	0.433423	2.11535	0.995118	1.4874	0.208983	1152.8;1076.02;2148.11;439.297;401.235;314.312;0;268.344;908.442;479.044;292.026;251.222;
Z:\MS_data\7600_ZenoTof\2022\202210\20221012_MS_DC24_VACV_zenoSWATH_thermostability\20221010_MS_zenoSWATH_DC24_VACV_41C_r1-MS_DC24_VACV_zenoSWATH_41C_r1.mzML	20221010_MS_zenoSWATH_DC24_VACV_41C_r1-MS_DC24_VACV_zenoSWATH_41C_r1	41C_r1	Q9D906	Q9D906	ATG7_MOUSE	Atg7	3101.71	1326.35	1326.35	3101.71	1326.35	1326.35	1326.35	AALENPM(UniMod:35)LL	AALENPMLL	AALENPM(UniMod:35)LL2	2	0.000600601	0.00549849	0.00320256	0.00638978	0.00631579	0.0112867	0.00643777	0	1	3101.71	1326.35	2414.58	2538.06	0.620047	29.1565	28.9954	29.3444	53.4026	29.1144	53.3163	Ubiquitin-like modifier-activating enzyme ATG7	0.000750188	0.00096432	0.101237	3260.33	1.19018	0.333723	2.15526	0.998138	1.40998	0.228202	760.585;1974.72;2996.59;406.533;700.591;258.339;0;378.894;1578.96;345.987;0;228.337;
Z:\MS_data\7600_ZenoTof\2022\202210\20221012_MS_DC24_VACV_zenoSWATH_thermostability\20221010_MS_zenoSWATH_DC24_VACV_41C_r2-MS_DC24_VACV_zenoSWATH_41C_r2.mzML	20221010_MS_zenoSWATH_DC24_VACV_41C_r2-MS_DC24_VACV_zenoSWATH_41C_r2	41C_r2	Q9D906	Q9D906	ATG7_MOUSE	Atg7	3539.72	1667.49	1667.49	3539.72	1667.49	1667.49	1667.49	AALENPM(UniMod:35)LL	AALENPMLL	AALENPM(UniMod:35)LL2	2	0.00066313	0.0113222	0.00320256	0.00618557	0.00612245	0.0112867	0.00623053	0	1	3539.72	1667.49	2497.96	1827.76	0.765759	29.1288	28.9946	29.3703	53.4026	29.1145	53.379	Ubiquitin-like modifier-activating enzyme ATG7	0.000750188	0.00096432	0.410012	2590.01	1.41526	0.339952	2.23563	0.996832	0	-10000000	1412.6;1689.75;2648.84;465.948;377.59;235.135;0;230.172;1763.86;384.488;70.0237;165.285;
Z:\MS_data\7600_ZenoTof\2022\202210\20221012_MS_DC24_VACV_zenoSWATH_thermostability\20221010_MS_zenoSWATH_DC24_VACV_41C_r3-MS_DC24_VACV_zenoSWATH_41C_r3.mzML	20221010_MS_zenoSWATH_DC24_VACV_41C_r3-MS_DC24_VACV_zenoSWATH_41C_r3	41C_r3	Q9D906	Q9D906	ATG7_MOUSE	Atg7	2811.59	1384.71	1384.71	2811.59	1384.71	1384.71	1384.71	AALENPM(UniMod:35)LL	AALENPMLL	AALENPM(UniMod:35)LL2	2	0.000596303	0.101246	0.00320256	0.00448431	0.00442968	0.0112867	0.00451977	0	1	2811.59	1384.71	2149.91	1357.18	0.71407	29.1548	28.967	29.289	53.4026	29.1352	53.3411	Ubiquitin-like modifier-activating enzyme ATG7	0.000750188	0.00096432	0	1774.87	0.907778	0.366544	2.2039	0.973748	1.1729	0.608495	744.164;1436.04;2421.32;230.467;173.992;288.001;47.3995;846.787;1711.97;614.745;0;0;
Z:\MS_data\7600_ZenoTof\2022\202210\20221012_MS_DC24_VACV_zenoSWATH_thermostability\20221010_MS_zenoSWATH_DC24_VACV_45C_r1-MS_DC24_VACV_zenoSWATH_45C_r1.mzML	20221010_MS_zenoSWATH_DC24_VACV_45C_r1-MS_DC24_VACV_zenoSWATH_45C_r1	45C_r1	Q9D906	Q9D906	ATG7_MOUSE	Atg7	5749.99	2244.58	2244.58	5749.99	2244.58	2244.58	2244.58	AALENPM(UniMod:35)LL	AALENPMLL	AALENPM(UniMod:35)LL2	2	0.00062461	0.00173658	0.00320256	0.00445434	0.00440044	0.0112867	0.00448934	0	1	5749.99	2244.58	4437.41	3990.33	0.577295	29.1824	28.9408	29.3971	53.4026	29.1341	53.4315	Ubiquitin-like modifier-activating enzyme ATG7	0.000750188	0.00096432	0.576784	5170.67	1.70244	0.524443	3.10611	0.999421	1.06173	0.169441	2434.29;2545.71;4161.65;490.246;403.738;36.5977;0;778.195;1827.21;1412.35;149.651;245.217;
Z:\MS_data\7600_ZenoTof\2022\202210\20221012_MS_DC24_VACV_zenoSWATH_thermostability\20221010_MS_zenoSWATH_DC24_VACV_45C_r2-MS_DC24_VACV_zenoSWATH_45C_r2.mzML	20221010_MS_zenoSWATH_DC24_VACV_45C_r2-MS_DC24_VACV_zenoSWATH_45C_r2	45C_r2	Q9D906	Q9D906	ATG7_MOUSE	Atg7	1164.44	769.947	769.947	1164.44	769.947	769.947	769.947	AALENPM(UniMod:35)LL	AALENPMLL	AALENPM(UniMod:35)LL2	2	0.000761615	0.00287968	0.00320256	0.00764331	0.00754717	0.0112867	0.00771208	0	1	1164.44	769.947	962.918	810.75	0.688059	29.1558	29.0753	29.2632	53.4026	29.1336	53.3621	Ubiquitin-like modifier-activating enzyme ATG7	0.000750188	0.00096432	0.247815	980.427	1.7006	0.408949	2.56872	0.99937	0	-10000000	384.995;782.514;1410.11;139.69;108.431;43.7737;0;45.9208;936.827;152.783;74.3616;103.982;
Z:\MS_data\7600_ZenoTof\2022\202210\20221012_MS_DC24_VACV_zenoSWATH_thermostability\20221010_MS_zenoSWATH_DC24_VACV_45C_r3-MS_DC24_VACV_zenoSWATH_45C_r3.mzML	20221010_MS_zenoSWATH_DC24_VACV_45C_r3-MS_DC24_VACV_zenoSWATH_45C_r3	45C_r3	Q9D906	Q9D906	ATG7_MOUSE	Atg7	1735.69	711.369	0	1735.69	711.369			AALENPM(UniMod:35)LL	AALENPMLL	AALENPM(UniMod:35)LL2	2	0.0149254	1	0.00320256	0.0204248	0.0202429	0.0112867	0.0205592	0	1	1735.69	711.369	1330.44	1557.28	0.442397	29.0754	28.9948	29.1828	53.4026	29.1329	53.2293	Ubiquitin-like modifier-activating enzyme ATG7	0.000750188	0.00096432	0.352094	2031.64	1.00573	0.170285	0.779298	0.666088	0	-10000000	1104.43;756.877;3411.75;13.1695;147.076;0;0;124.347;537.211;454.743;0;0;
Z:\MS_data\7600_ZenoTof\2022\202210\20221012_MS_DC24_VACV_zenoSWATH_thermostability\20221010_MS_zenoSWATH_DC24_VACV_49C_r1-MS_DC24_VACV_zenoSWATH_49C_r1.mzML	20221010_MS_zenoSWATH_DC24_VACV_49C_r1-MS_DC24_VACV_zenoSWATH_49C_r1	49C_r1	Q9D906	Q9D906	ATG7_MOUSE	Atg7	94.5531	70.4705	0	94.5531	70.4705			AALENPM(UniMod:35)LL	AALENPMLL	AALENPM(UniMod:35)LL2	2	0.0229965	1	0.00320256	0.0290023	0.0297824	0.0112867	0.0292056	0	1	94.5531	70.4705	74.1813	499.922	0.801784	29.0234	28.9697	29.0771	53.4026	29.1042	53.1257	Ubiquitin-like modifier-activating enzyme ATG7	0.000750188	0.00096432	0.250676	637.212	0.827043	0.335361	0.219256	0.703669	0	-10000000	94.5531;0;735.18;94.2246;445.258;0;0;161.008;130.72;0;0;112.711;
Z:\MS_data\7600_ZenoTof\2022\202210\20221012_MS_DC24_VACV_zenoSWATH_thermostability\20221010_MS_zenoSWATH_DC24_VACV_49C_r2-MS_DC24_VACV_zenoSWATH_49C_r2.mzML	20221010_MS_zenoSWATH_DC24_VACV_49C_r2-MS_DC24_VACV_zenoSWATH_49C_r2	49C_r2	Q9D906	Q9D906	ATG7_MOUSE	Atg7	924.743	552.99	552.99	924.743	552.99	552.99	552.99	AALENPM(UniMod:35)LL	AALENPMLL	AALENPM(UniMod:35)LL2	2	0.000857633	0.0439649	0.00320256	0.00815217	0.00803213	0.0112867	0.00823045	0	1	924.743	552.99	793.952	1943.03	0.517804	29.1556	29.0751	29.3704	53.4026	29.1935	53.2569	Ubiquitin-like modifier-activating enzyme ATG7	0.000750188	0.00096432	0.836507	2263.12	2.10827	0.032023	1.63149	0.989	0	-10000000	502.748;1573.04;3008.08;75.5678;246.087;0;0;53.6685;1105.38;224.243;106.895;25.4139;
Z:\MS_data\7600_ZenoTof\2022\202210\20221012_MS_DC24_VACV_zenoSWATH_thermostability\20221010_MS_zenoSWATH_DC24_VACV_49C_r3-MS_DC24_VACV_zenoSWATH_49C_r3.mzML	20221010_MS_zenoSWATH_DC24_VACV_49C_r3-MS_DC24_VACV_zenoSWATH_49C_r3	49C_r3	Q9D906	Q9D906	ATG7_MOUSE	Atg7	1994.86	1540.52	1540.52	1994.86	1540.52	1540.52	1540.52	AALENPM(UniMod:35)LL	AALENPMLL	AALENPM(UniMod:35)LL2	2	0.00182149	0.145873	0.00320256	0.00857143	0.00843882	0.0112867	0.00865801	0	1	1994.86	1540.52	1580.25	574.985	0.835212	29.1565	28.9687	29.2639	53.4026	29.1677	53.4192	Ubiquitin-like modifier-activating enzyme ATG7	0.000750188	0.00096432	0.337928	725.846	0.867567	0.310104	1.31918	0.967936	0	-10000000	138.983;447.341;1943.35;22.8899;97.858;19.8538;0;129.07;169.421;192.724;142.681;215.335;
Z:\MS_data\7600_ZenoTof\2022\202210\20221012_MS_DC24_VACV_zenoSWATH_thermostability\20221010_MS_zenoSWATH_DC24_VACV_53C_r1-MS_DC24_VACV_zenoSWATH_53C_r1.mzML	20221010_MS_zenoSWATH_DC24_VACV_53C_r1-MS_DC24_VACV_zenoSWATH_53C_r1	53C_r1	Q9D906	Q9D906	ATG7_MOUSE	Atg7	988.879	770.863	770.863	988.879	770.863	770.863	770.863	AALENPM(UniMod:35)LL	AALENPMLL	AALENPM(UniMod:35)LL2	2	0.000898473	0.128735	0.00320256	0.00739372	0.00724638	0.0112867	0.00747664	0	1	988.879	770.863	1026.22	1063.32	0.670007	29.2907	29.1297	29.3444	53.4026	29.1634	53.8161	Ubiquitin-like modifier-activating enzyme ATG7	0.000750188	0.00096432	0.374712	1024.63	1.29245	0.570867	1.01783	0.966136	0	-10000000	627.068;397.131;1657.56;69.297;31.5298;0;0;183.306;505.107;206.439;0;0;
Z:\MS_data\7600_ZenoTof\2022\202210\20221012_MS_DC24_VACV_zenoSWATH_thermostability\20221010_MS_zenoSWATH_DC24_VACV_53C_r2-MS_DC24_VACV_zenoSWATH_53C_r2.mzML	20221010_MS_zenoSWATH_DC24_VACV_53C_r2-MS_DC24_VACV_zenoSWATH_53C_r2	53C_r2	Q9D906	Q9D906	ATG7_MOUSE	Atg7	826.522	664.074	664.074	826.522	664.074	664.074	664.074	AALENPM(UniMod:35)LL	AALENPMLL	AALENPM(UniMod:35)LL2	2	0.00102775	0.0276942	0.00320256	0.0103448	0.0101868	0.0112867	0.0104348	0	1	826.522	664.074	630.906	596.778	0.565	29.1286	29.0749	29.2092	53.4026	29.1626	53.219	Ubiquitin-like modifier-activating enzyme ATG7	0.000750188	0.00096432	0.36479	781.812	0.7083	0.449153	1.45144	0.992114	1.06562	0.1808	145.331;810.024;1184.34;15.8348;0;0;0;0;408.21;454.745;0;0;
Z:\MS_data\7600_ZenoTof\2022\202210\20221012_MS_DC24_VACV_zenoSWATH_thermostability\20221010_MS_zenoSWATH_DC24_VACV_53C_r3-MS_DC24_VACV_zenoSWATH_53C_r3.mzML	20221010_MS_zenoSWATH_DC24_VACV_53C_r3-MS_DC24_VACV_zenoSWATH_53C_r3	53C_r3	Q9D906	Q9D906	ATG7_MOUSE	Atg7	68.0537	101.258	101.258	68.0537	101.258	101.258	101.258	AALENPM(UniMod:35)LL	AALENPMLL	AALENPM(UniMod:35)LL2	2	0.00344432	0.243085	0.00320256	0.0129151	0.0126812	0.0112867	0.0130597	0	1	68.0537	101.258	75.9804	296.387	0.455114	29.2362	29.1825	29.2899	53.4026	29.1327	53.751	Ubiquitin-like modifier-activating enzyme ATG7	0.000750188	0.00096432	0.103323	265.466	1.22437	0.00912342	0.239962	0.948688	0	-10000000	0;37.9241;277.127;43.2711;144.961;44.9699;0;0;87.1457;0;0;0;
Z:\MS_data\7600_ZenoTof\2022\202210\20221012_MS_DC24_VACV_zenoSWATH_thermostability\20221010_MS_zenoSWATH_DC24_VACV_37C_r1-MS_DC24_VACV_zenoSWATH_37C_r1.mzML	20221010_MS_zenoSWATH_DC24_VACV_37C_r1-MS_DC24_VACV_zenoSWATH_37C_r1	37C_r1	Q9D187	Q9D187	CIA2B_MOUSE	Ciao2b	8867.97	3319.97	3319.97	8867.97	3319.97	3319.97	3319.97	AALENTHLL	AALENTHLL	AALENTHLL2	2	0.000590319	0.000752553	0.00284558	0.00535332	0.00529101	0.00401606	0.00539374	0	1	8867.97	3319.97	6481.32	2013.69	0.894492	22.8488	22.7146	23.0098	29.4893	22.8968	29.3077	Cytosolic iron-sulfur assembly component 2B	0.000255267	0.00096432	0.884811	2755.2	4.08392	0.680792	0.880024	0.999755	1.06741	0.0271632	4447.92;3013.63;2006.01;145.573;787.664;
Z:\MS_data\7600_ZenoTof\2022\202210\20221012_MS_DC24_VACV_zenoSWATH_thermostability\20221010_MS_zenoSWATH_DC24_VACV_37C_r2-MS_DC24_VACV_zenoSWATH_37C_r2.mzML	20221010_MS_zenoSWATH_DC24_VACV_37C_r2-MS_DC24_VACV_zenoSWATH_37C_r2	37C_r2	Q9D187	Q9D187	CIA2B_MOUSE	Ciao2b	6592.7	3453	3453	6592.7	3453	3453	3453	AALENTHLL	AALENTHLL	AALENTHLL2	2	0.000575374	0.0187413	0.00284558	0.00507614	0.00493827	0.00401606	0.00512821	0	1	6592.7	3453	4809.03	1838.57	0.863604	22.821	22.66	22.982	29.4893	22.8571	29.3742	Cytosolic iron-sulfur assembly component 2B	0.000255267	0.00096432	0.950949	2520.5	3.23169	0.621617	0.476018	0.99488	0	-10000000	2523.09;3662.02;1363.19;217.067;244.419;
Z:\MS_data\7600_ZenoTof\2022\202210\20221012_MS_DC24_VACV_zenoSWATH_thermostability\20221010_MS_zenoSWATH_DC24_VACV_37C_r3-MS_DC24_VACV_zenoSWATH_37C_r3.mzML	20221010_MS_zenoSWATH_DC24_VACV_37C_r3-MS_DC24_VACV_zenoSWATH_37C_r3	37C_r3	Q9D187	Q9D187	CIA2B_MOUSE	Ciao2b	4234.28	1933.86	1933.86	4234.28	1933.86	1933.86	1933.86	AALENTHLL	AALENTHLL	AALENTHLL2	2	0.000596659	0.00112477	0.00284558	0.00554939	0.00548246	0.00401606	0.00447427	0	1	4234.28	1933.86	3236.38	1713.91	0.77749	22.8481	22.687	23.0091	29.4893	22.9023	29.2529	Cytosolic iron-sulfur assembly component 2B	0.000255267	0.00096432	0.926897	2242.37	2.85934	0.627734	0.657455	0.999676	0	-10000000	2517.42;2890.05;1004.56;118.871;871.856;
Z:\MS_data\7600_ZenoTof\2022\202210\20221012_MS_DC24_VACV_zenoSWATH_thermostability\20221010_MS_zenoSWATH_DC24_VACV_41C_r1-MS_DC24_VACV_zenoSWATH_41C_r1.mzML	20221010_MS_zenoSWATH_DC24_VACV_41C_r1-MS_DC24_VACV_zenoSWATH_41C_r1	41C_r1	Q9D187	Q9D187	CIA2B_MOUSE	Ciao2b	5647.06	2414.79	2414.79	5647.06	2414.79	2414.79	2414.79	AALENTHLL	AALENTHLL	AALENTHLL2	2	1.12443e-05	1.12443e-05	0.00284558	0.00638978	0.00631579	0.00401606	0.00643777	0	1	5647.06	2414.79	4396.06	2236.28	0.738197	22.8488	22.7683	22.9294	29.4893	22.878	29.3786	Cytosolic iron-sulfur assembly component 2B	0.000255267	0.00096432	0.885956	2872.67	3.89989	0.764567	0.852339	0.999996	0	-10000000	4027.88;3247.54;1655.51;505.847;206.009;
Z:\MS_data\7600_ZenoTof\2022\202210\20221012_MS_DC24_VACV_zenoSWATH_thermostability\20221010_MS_zenoSWATH_DC24_VACV_41C_r2-MS_DC24_VACV_zenoSWATH_41C_r2.mzML	20221010_MS_zenoSWATH_DC24_VACV_41C_r2-MS_DC24_VACV_zenoSWATH_41C_r2	41C_r2	Q9D187	Q9D187	CIA2B_MOUSE	Ciao2b	8478.84	3994.22	3994.22	8478.84	3994.22	3994.22	3994.22	AALENTHLL	AALENTHLL	AALENTHLL2	2	0.00066313	0.00333696	0.00284558	0.00507614	0.00493827	0.00401606	0.00514139	0	1	8478.84	3994.22	5983.48	2107.51	0.868419	22.848	22.6601	23.009	29.4893	22.8841	29.3482	Cytosolic iron-sulfur assembly component 2B	0.000255267	0.00096432	0.9893	2986.43	3.59444	0.676306	0.683576	0.999064	0	-10000000	3166.22;3423.89;2180.53;379.221;486.178;
Z:\MS_data\7600_ZenoTof\2022\202210\20221012_MS_DC24_VACV_zenoSWATH_thermostability\20221010_MS_zenoSWATH_DC24_VACV_41C_r3-MS_DC24_VACV_zenoSWATH_41C_r3.mzML	20221010_MS_zenoSWATH_DC24_VACV_41C_r3-MS_DC24_VACV_zenoSWATH_41C_r3	41C_r3	Q9D187	Q9D187	CIA2B_MOUSE	Ciao2b	7800.13	3841.56	3841.56	7800.13	3841.56	3841.56	3841.56	AALENTHLL	AALENTHLL	AALENTHLL2	2	7.23025e-05	7.23025e-05	0.00284558	0.00448431	0.00442968	0.00401606	0.00451977	0	1	7800.13	3841.56	5964.45	2534.29	0.827301	22.8745	22.7403	22.9818	29.4893	22.8807	29.4976	Cytosolic iron-sulfur assembly component 2B	0.000255267	0.00096432	0.930426	3314.27	4.24538	0.71262	0.894952	0.999981	0	-10000000	4620.46;3896.45;2425.69;938.249;366.551;
Z:\MS_data\7600_ZenoTof\2022\202210\20221012_MS_DC24_VACV_zenoSWATH_thermostability\20221010_MS_zenoSWATH_DC24_VACV_45C_r1-MS_DC24_VACV_zenoSWATH_45C_r1.mzML	20221010_MS_zenoSWATH_DC24_VACV_45C_r1-MS_DC24_VACV_zenoSWATH_45C_r1	45C_r1	Q9D187	Q9D187	CIA2B_MOUSE	Ciao2b	8219.74	3208.68	3208.67	8219.74	3208.68	3208.67	3208.67	AALENTHLL	AALENTHLL	AALENTHLL2	2	0.00062461	0.00111387	0.00284558	0.00445434	0.00440044	0.00401606	0.00448934	0	1	8219.74	3208.68	6343.37	2778.88	0.849183	22.9018	22.6871	22.9823	29.4893	22.8932	29.5309	Cytosolic iron-sulfur assembly component 2B	0.000255267	0.00096432	0.958259	3600.87	3.45544	0.401504	0.759989	0.999629	1.06741	0.165623	3283.15;4111.89;2366.8;226.976;661.454;
Z:\MS_data\7600_ZenoTof\2022\202210\20221012_MS_DC24_VACV_zenoSWATH_thermostability\20221010_MS_zenoSWATH_DC24_VACV_45C_r2-MS_DC24_VACV_zenoSWATH_45C_r2.mzML	20221010_MS_zenoSWATH_DC24_VACV_45C_r2-MS_DC24_VACV_zenoSWATH_45C_r2	45C_r2	Q9D187	Q9D187	CIA2B_MOUSE	Ciao2b	3614.17	2389.75	2389.75	3614.17	2389.75	2389.75	2389.75	AALENTHLL	AALENTHLL	AALENTHLL2	2	0.000761615	0.0174734	0.00284558	0.00600601	0.00581395	0.00401606	0.00609756	0	1	3614.17	2389.75	2988.69	1415.86	0.784702	22.8215	22.7141	22.902	29.4893	22.8917	29.2534	Cytosolic iron-sulfur assembly component 2B	0.000255267	0.00096432	0.819351	1712.18	3.24328	0.597273	0.922399	0.996189	0	-10000000	2168.61;1670.36;1320.58;0;115.077;
Z:\MS_data\7600_ZenoTof\2022\202210\20221012_MS_DC24_VACV_zenoSWATH_thermostability\20221010_MS_zenoSWATH_DC24_VACV_45C_r3-MS_DC24_VACV_zenoSWATH_45C_r3.mzML	20221010_MS_zenoSWATH_DC24_VACV_45C_r3-MS_DC24_VACV_zenoSWATH_45C_r3	45C_r3	Q9D187	Q9D187	CIA2B_MOUSE	Ciao2b	7496.22	3072.31	3072.31	7496.22	3072.31	3072.31	3072.31	AALENTHLL	AALENTHLL	AALENTHLL2	2	0.000587889	0.00566328	0.00284558	0.00461894	0.004561	0.00401606	0.00465116	0	1	7496.22	3072.31	5745.98	2092.6	0.810599	22.9019	22.714	22.9824	29.4893	22.8882	29.6226	Cytosolic iron-sulfur assembly component 2B	0.000255267	0.00096432	0.878949	2730.02	3.30813	0.627477	0.640121	0.998246	0	-10000000	2677.78;4283.23;2130.26;199.625;376.586;
Z:\MS_data\7600_ZenoTof\2022\202210\20221012_MS_DC24_VACV_zenoSWATH_thermostability\20221010_MS_zenoSWATH_DC24_VACV_49C_r1-MS_DC24_VACV_zenoSWATH_49C_r1.mzML	20221010_MS_zenoSWATH_DC24_VACV_49C_r1-MS_DC24_VACV_zenoSWATH_49C_r1	49C_r1	Q9D187	Q9D187	CIA2B_MOUSE	Ciao2b	648.412	483.262	483.262	648.412	483.262	483.262	483.262	AALENTHLL	AALENTHLL	AALENTHLL2	2	0.000897666	0.0279911	0.00284558	0.00934579	0.00920245	0.00401606	0.00941915	0	1	648.412	483.262	508.709	443.219	0.769286	22.8765	22.7691	22.957	29.4893	22.8598	29.6187	Cytosolic iron-sulfur assembly component 2B	0.000255267	0.00096432	0.827516	564.937	2.3571	0.59975	0	0.992344	0	-10000000	498.092;488.41;167.826;0;0;
Z:\MS_data\7600_ZenoTof\2022\202210\20221012_MS_DC24_VACV_zenoSWATH_thermostability\20221010_MS_zenoSWATH_DC24_VACV_49C_r2-MS_DC24_VACV_zenoSWATH_49C_r2.mzML	20221010_MS_zenoSWATH_DC24_VACV_49C_r2-MS_DC24_VACV_zenoSWATH_49C_r2	49C_r2	Q9D187	Q9D187	CIA2B_MOUSE	Ciao2b	5344.75	3196.12	3196.13	5344.75	3196.12	3196.13	3196.13	AALENTHLL	AALENTHLL	AALENTHLL2	2	0.000857633	0.00324911	0.00284558	0.00689655	0.00664452	0.00401606	0.00699301	0	1	5344.75	3196.12	4588.81	2028.86	0.847319	22.8749	22.7407	23.036	29.4893	22.9	29.3508	Cytosolic iron-sulfur assembly component 2B	0.000255267	0.00096432	0.906738	2363.08	3.54709	0.397215	0.812169	0.999179	0	-10000000	2603.12;3741.48;997.375;190.149;570.836;
Z:\MS_data\7600_ZenoTof\2022\202210\20221012_MS_DC24_VACV_zenoSWATH_thermostability\20221010_MS_zenoSWATH_DC24_VACV_49C_r3-MS_DC24_VACV_zenoSWATH_49C_r3.mzML	20221010_MS_zenoSWATH_DC24_VACV_49C_r3-MS_DC24_VACV_zenoSWATH_49C_r3	49C_r3	Q9D187	Q9D187	CIA2B_MOUSE	Ciao2b	2813.44	2172.66	2172.66	2813.44	2172.66	2172.66	2172.66	AALENTHLL	AALENTHLL	AALENTHLL2	2	0.000940734	0.00554987	0.00284558	0.0078125	0.00749064	0.00401606	0.00793651	0	1	2813.44	2172.66	2228.69	1316.76	0.725647	22.9026	22.6879	22.9831	29.4893	22.8935	29.5223	Cytosolic iron-sulfur assembly component 2B	0.000255267	0.00096432	0.905513	1662.24	2.88884	0.721771	0.836411	0.998741	0	-10000000	1231.75;1864.14;1821.42;138.252;287.221;
Z:\MS_data\7600_ZenoTof\2022\202210\20221012_MS_DC24_VACV_zenoSWATH_thermostability\20221010_MS_zenoSWATH_DC24_VACV_53C_r1-MS_DC24_VACV_zenoSWATH_53C_r1.mzML	20221010_MS_zenoSWATH_DC24_VACV_53C_r1-MS_DC24_VACV_zenoSWATH_53C_r1	53C_r1	Q9D187	Q9D187	CIA2B_MOUSE	Ciao2b	2994.92	2334.64	2334.64	2994.92	2334.64	2334.64	2334.64	AALENTHLL	AALENTHLL	AALENTHLL2	2	0.000898473	0.00120882	0.00284558	0.00739372	0.00724638	0.00401606	0.00747664	0	1	2994.92	2334.64	3108.01	1690.76	0.798517	22.822	22.7415	22.9831	29.4893	22.8614	29.2413	Cytosolic iron-sulfur assembly component 2B	0.000255267	0.00096432	0.764617	1629.24	2.9674	0.483025	0.429072	0.999671	0	-10000000	1018.89;2435.44;1263.35;125.976;517.528;
Z:\MS_data\7600_ZenoTof\2022\202210\20221012_MS_DC24_VACV_zenoSWATH_thermostability\20221010_MS_zenoSWATH_DC24_VACV_53C_r2-MS_DC24_VACV_zenoSWATH_53C_r2.mzML	20221010_MS_zenoSWATH_DC24_VACV_53C_r2-MS_DC24_VACV_zenoSWATH_53C_r2	53C_r2	Q9D187	Q9D187	CIA2B_MOUSE	Ciao2b	4703.02	3778.67	3778.67	4703.02	3778.67	3778.67	3778.67	AALENTHLL	AALENTHLL	AALENTHLL2	2	0.00102775	0.00370494	0.00284558	0.0052356	0.00495049	0.00401606	0.00534759	0	1	4703.02	3778.67	3589.94	1353.36	0.831066	22.9018	22.7407	22.9823	29.4893	22.8558	29.5906	Cytosolic iron-sulfur assembly component 2B	0.000255267	0.00096432	0.870216	1772.97	3.53822	0.542365	0.587756	0.998938	0	-10000000	2200.96;2020.43;1198.47;118.224;259.158;
Z:\MS_data\7600_ZenoTof\2022\202210\20221012_MS_DC24_VACV_zenoSWATH_thermostability\20221010_MS_zenoSWATH_DC24_VACV_53C_r3-MS_DC24_VACV_zenoSWATH_53C_r3.mzML	20221010_MS_zenoSWATH_DC24_VACV_53C_r3-MS_DC24_VACV_zenoSWATH_53C_r3	53C_r3	Q9D187	Q9D187	CIA2B_MOUSE	Ciao2b	1091.65	1624.28	1624.28	1091.65	1624.28	1624.28	1624.28	AALENTHLL	AALENTHLL	AALENTHLL2	2	0.000940468	0.000940468	0.00284558	0.0111524	0.0109489	0.00401606	0.011257	0	1	1091.65	1624.28	1218.8	1164.03	0.681598	22.8213	22.7407	22.9555	29.4893	22.8424	29.3847	Cytosolic iron-sulfur assembly component 2B	0.000255267	0.00096432	0.808359	1042.59	2.93353	0.559919	0.904891	0.999791	0	-10000000	633.471;1752.99;565.246;137.176;161.796;
Z:\MS_data\7600_ZenoTof\2022\202210\20221012_MS_DC24_VACV_zenoSWATH_thermostability\20221010_MS_zenoSWATH_DC24_VACV_37C_r1-MS_DC24_VACV_zenoSWATH_37C_r1.mzML	20221010_MS_zenoSWATH_DC24_VACV_37C_r1-MS_DC24_VACV_zenoSWATH_37C_r1	37C_r1	Q91W59	Q91W59	RBMS1_MOUSE	Rbms1	19477.1	7291.78	6404.29	19477.1	7291.78	6404.29	6404.29	AALHNGFYP	AALHNGFYP	AALHNGFYP2	2	0.00017566	0.00017566	0.00837138	0.00294985	0.00285714	0.00214592	0.00299401	0	1	19477.1	7291.78	14235.2	3613.45	0.940702	20.836	20.6213	20.9702	21.1078	20.7562	21.2942	RNA-binding motif, single-stranded-interacting protein 1	0.000750188	0.00096432	0.959979	4944.06	3.33567	0.66966	2.83972	0.999943	0	-10000000	5777.79;13769.7;147.295;254.156;731.335;0;0;0;449.636;79.634;1197.65;0;
Z:\MS_data\7600_ZenoTof\2022\202210\20221012_MS_DC24_VACV_zenoSWATH_thermostability\20221010_MS_zenoSWATH_DC24_VACV_37C_r2-MS_DC24_VACV_zenoSWATH_37C_r2.mzML	20221010_MS_zenoSWATH_DC24_VACV_37C_r2-MS_DC24_VACV_zenoSWATH_37C_r2	37C_r2	Q91W59	Q91W59	RBMS1_MOUSE	Rbms1	14130.6	7401.06	6187.45	14130.6	7401.06	6187.45	6187.45	AALHNGFYP	AALHNGFYP	AALHNGFYP2	2	0.000575374	0.000624195	0.00837138	0.00294985	0.00285714	0.00214592	0.00298507	0	1	14130.6	7401.06	10307.5	2567.91	0.922719	20.8084	20.6742	20.9426	21.1078	20.7109	21.3821	RNA-binding motif, single-stranded-interacting protein 1	0.000750188	0.00096432	0.981637	3520.35	3.68987	0.609242	1.50176	0.999829	0	-10000000	3576.4;10730.8;854.208;158.848;536.307;0;0;0;626.905;0;355.589;0;
Z:\MS_data\7600_ZenoTof\2022\202210\20221012_MS_DC24_VACV_zenoSWATH_thermostability\20221010_MS_zenoSWATH_DC24_VACV_37C_r3-MS_DC24_VACV_zenoSWATH_37C_r3.mzML	20221010_MS_zenoSWATH_DC24_VACV_37C_r3-MS_DC24_VACV_zenoSWATH_37C_r3	37C_r3	Q91W59	Q91W59	RBMS1_MOUSE	Rbms1	16237.6	7415.96	7672.48	16237.6	7415.96	7672.48	7672.48	AALHNGFYP	AALHNGFYP	AALHNGFYP2	2	0.000596659	0.000629146	0.00837138	0.00310559	0.003003	0.00214592	0.00314465	0	1	16237.6	7415.96	12410.9	3261.37	0.916907	20.8354	20.7012	20.9696	21.1078	20.7152	21.3879	RNA-binding motif, single-stranded-interacting protein 1	0.000750188	0.00096432	0.976801	4266.97	2.84456	0.655525	1.39172	0.999819	0	-10000000	5064.02;11765.5;124.724;0;403.646;0;0;0;121.528;0;705.764;0;
Z:\MS_data\7600_ZenoTof\2022\202210\20221012_MS_DC24_VACV_zenoSWATH_thermostability\20221010_MS_zenoSWATH_DC24_VACV_41C_r1-MS_DC24_VACV_zenoSWATH_41C_r1.mzML	20221010_MS_zenoSWATH_DC24_VACV_41C_r1-MS_DC24_VACV_zenoSWATH_41C_r1	41C_r1	Q91W59	Q91W59	RBMS1_MOUSE	Rbms1	10262	4388.24	4197.25	10262	4388.24	4197.25	4197.25	AALHNGFYP	AALHNGFYP	AALHNGFYP2	2	0.000141087	0.000141087	0.00837138	0.00303951	0.00294118	0.00214592	0.00307692	0	1	10262	4388.24	7988.66	2044.71	0.913914	20.8361	20.6751	20.9972	21.1078	20.7427	21.3944	RNA-binding motif, single-stranded-interacting protein 1	0.000750188	0.00096432	0.943897	2626.59	2.5864	0.561597	2.74076	0.999952	0	-10000000	3697.12;6564.91;93.542;118.254;229.016;0;0;0;137.719;0;216.717;11.5559;
Z:\MS_data\7600_ZenoTof\2022\202210\20221012_MS_DC24_VACV_zenoSWATH_thermostability\20221010_MS_zenoSWATH_DC24_VACV_41C_r2-MS_DC24_VACV_zenoSWATH_41C_r2.mzML	20221010_MS_zenoSWATH_DC24_VACV_41C_r2-MS_DC24_VACV_zenoSWATH_41C_r2	41C_r2	Q91W59	Q91W59	RBMS1_MOUSE	Rbms1	10280.7	4843.05	4846.95	10280.7	4843.05	4846.95	4846.95	AALHNGFYP	AALHNGFYP	AALHNGFYP2	2	0.00066313	0.0092311	0.00837138	0.00618557	0.00612245	0.00214592	0.00623053	0	1	10280.7	4843.05	7255.06	2113.71	0.906555	20.8353	20.6474	20.9695	21.1078	20.6907	21.5273	RNA-binding motif, single-stranded-interacting protein 1	0.000750188	0.00096432	0.978155	2995.21	2.62307	0.642476	2.18612	0.997416	0	-10000000	2500.02;7905.77;67.9469;77.4384;119.073;0;0;0;515.017;0;919.621;0;
Z:\MS_data\7600_ZenoTof\2022\202210\20221012_MS_DC24_VACV_zenoSWATH_thermostability\20221010_MS_zenoSWATH_DC24_VACV_41C_r3-MS_DC24_VACV_zenoSWATH_41C_r3.mzML	20221010_MS_zenoSWATH_DC24_VACV_41C_r3-MS_DC24_VACV_zenoSWATH_41C_r3	41C_r3	Q91W59	Q91W59	RBMS1_MOUSE	Rbms1	11144.6	5488.7	7620.68	11144.6	5488.7	7620.68	7620.68	AALHNGFYP	AALHNGFYP	AALHNGFYP2	2	0.000492966	0.000492966	0.00837138	0.00284091	0.00275482	0.00214592	0.00288184	0	1	11144.6	5488.7	8521.82	1952.11	0.876232	20.8081	20.7008	20.9692	21.1078	20.7112	21.3903	RNA-binding motif, single-stranded-interacting protein 1	0.000750188	0.00096432	0.962054	2552.9	2.71285	0.655303	0.830461	0.999869	0	-10000000	3798.47;7346.1;0;413.007;82.7492;0;0;0;599.247;0;303.406;0;
Z:\MS_data\7600_ZenoTof\2022\202210\20221012_MS_DC24_VACV_zenoSWATH_thermostability\20221010_MS_zenoSWATH_DC24_VACV_37C_r1-MS_DC24_VACV_zenoSWATH_37C_r1.mzML	20221010_MS_zenoSWATH_DC24_VACV_37C_r1-MS_DC24_VACV_zenoSWATH_37C_r1	37C_r1	Q9DC23	Q9DC23	DJC10_MOUSE	Dnajc10	673.406	252.108	380.009	673.406	252.108	380.009	380.009	AALIYGKL	AALIYGKL	AALIYGKL2	2	0.000590319	0.0061263	0.00320256	0.00294985	0.00285714	0.00214592	0.00299401	0	1	595.603	222.981	435.308	209.082	0.73651	24.9399	24.8057	25.0204	37.6599	24.9319	37.5882	DnaJ homolog subfamily C member 10	0.000750188	0.00096432	0.412204	286.073	1.94992	0.0406451	1.371	0.998008	0	-10000000	537.541;237.051;656.897;0;360.078;106.915;0;0;0;0;0;0;
Z:\MS_data\7600_ZenoTof\2022\202210\20221012_MS_DC24_VACV_zenoSWATH_thermostability\20221010_MS_zenoSWATH_DC24_VACV_37C_r2-MS_DC24_VACV_zenoSWATH_37C_r2.mzML	20221010_MS_zenoSWATH_DC24_VACV_37C_r2-MS_DC24_VACV_zenoSWATH_37C_r2	37C_r2	Q9DC23	Q9DC23	DJC10_MOUSE	Dnajc10	706.045	369.799	457.479	706.045	369.799	457.479	457.479	AALIYGKL	AALIYGKL	AALIYGKL2	2	0.000575374	0.00740837	0.00320256	0.00294985	0.00285714	0.00214592	0.00298507	0	1	431.278	225.887	314.595	149.473	0.633347	24.9119	24.8045	24.9656	37.6599	24.9385	37.5153	DnaJ homolog subfamily C member 10	0.000750188	0.00096432	0.67277	204.913	1.71925	0.368403	0.422447	0.99797	1.42145	0.139671	522.942;159.759;69.6744;0;0;0;0;0;0;0;0;0;
Z:\MS_data\7600_ZenoTof\2022\202210\20221012_MS_DC24_VACV_zenoSWATH_thermostability\20221010_MS_zenoSWATH_DC24_VACV_37C_r3-MS_DC24_VACV_zenoSWATH_37C_r3.mzML	20221010_MS_zenoSWATH_DC24_VACV_37C_r3-MS_DC24_VACV_zenoSWATH_37C_r3	37C_r3	Q9DC23	Q9DC23	DJC10_MOUSE	Dnajc10	1018.14	465.001	484.452	1018.14	465.001	484.452	484.452	AALIYGKL	AALIYGKL	AALIYGKL2	2	0.000596659	0.000833745	0.00320256	0.00310559	0.003003	0.00214592	0.00314465	0	1	452.697	206.754	346.009	242.879	0.718135	24.8585	24.8048	25.0465	37.6599	24.9506	37.0732	DnaJ homolog subfamily C member 10	0.000750188	0.00096432	0.62945	317.767	1.65384	0.359151	0.885195	0.999759	0	-10000000	430.849;159.917;457.896;73.2757;383.767;20.8935;0;27.0821;0;0;0;0;
Z:\MS_data\7600_ZenoTof\2022\202210\20221012_MS_DC24_VACV_zenoSWATH_thermostability\20221010_MS_zenoSWATH_DC24_VACV_41C_r1-MS_DC24_VACV_zenoSWATH_41C_r1.mzML	20221010_MS_zenoSWATH_DC24_VACV_41C_r1-MS_DC24_VACV_zenoSWATH_41C_r1	41C_r1	Q9DC23	Q9DC23	DJC10_MOUSE	Dnajc10	408.075	174.501	262.807	408.075	174.501	262.807	262.807	AALIYGKL	AALIYGKL	AALIYGKL2	2	0.000600601	0.0352576	0.00320256	0.00303951	0.00294118	0.00214592	0.00307692	0	1	408.075	174.501	317.674	93.0394	0.605518	24.913	24.8593	24.9667	37.6599	24.9166	37.3823	DnaJ homolog subfamily C member 10	0.000750188	0.00096432	0.545088	119.516	1.63634	0.291193	0	0.98818	1.15935	0.0783965	908.075;178.573;104.513;0;104.664;0;0;74.061;0;0;0;0;
Z:\MS_data\7600_ZenoTof\2022\202210\20221012_MS_DC24_VACV_zenoSWATH_thermostability\20221010_MS_zenoSWATH_DC24_VACV_41C_r2-MS_DC24_VACV_zenoSWATH_41C_r2.mzML	20221010_MS_zenoSWATH_DC24_VACV_41C_r2-MS_DC24_VACV_zenoSWATH_41C_r2	41C_r2	Q9DC23	Q9DC23	DJC10_MOUSE	Dnajc10	425.527	200.458	304.52	425.527	200.458	304.52	304.52	AALIYGKL	AALIYGKL	AALIYGKL2	2	0.00066313	0.0215945	0.00320256	0.00290698	0.0028169	0.00214592	0.00294985	0	1	382.591	180.231	269.993	343.069	0.754745	24.939	24.8316	24.9927	37.6599	24.9101	37.5713	DnaJ homolog subfamily C member 10	0.000750188	0.00096432	0.791185	486.143	2.1287	0.445925	0.207912	0.993976	0	-10000000	370.955;199.11;303.515;0;91.1254;0;0;77.3786;0;0;0;0;
Z:\MS_data\7600_ZenoTof\2022\202210\20221012_MS_DC24_VACV_zenoSWATH_thermostability\20221010_MS_zenoSWATH_DC24_VACV_41C_r3-MS_DC24_VACV_zenoSWATH_41C_r3.mzML	20221010_MS_zenoSWATH_DC24_VACV_41C_r3-MS_DC24_VACV_zenoSWATH_41C_r3	41C_r3	Q9DC23	Q9DC23	DJC10_MOUSE	Dnajc10	267.303	131.647	99.632	267.303	131.647	99.632	99.632	AALIYGKL	AALIYGKL	AALIYGKL2	2	0.000596303	0.0134891	0.00320256	0.00284091	0.00275482	0.00214592	0.00288184	0	1	267.303	131.647	204.396	208.867	0.910841	24.9117	24.858	25.0459	37.6599	24.9336	37.4783	DnaJ homolog subfamily C member 10	0.000750188	0.00096432	0.677023	273.15	1.8755	0.10081	0.739809	0.996421	1.24921	0.0976259	264.692;68.5126;200.434;73.2752;13.2782;0;0;0;0;0;0;0;
Z:\MS_data\7600_ZenoTof\2022\202210\20221012_MS_DC24_VACV_zenoSWATH_thermostability\20221010_MS_zenoSWATH_DC24_VACV_45C_r1-MS_DC24_VACV_zenoSWATH_45C_r1.mzML	20221010_MS_zenoSWATH_DC24_VACV_45C_r1-MS_DC24_VACV_zenoSWATH_45C_r1	45C_r1	Q9DC23	Q9DC23	DJC10_MOUSE	Dnajc10	581.553	227.016	115.65	581.553	227.016	115.65	115.65	AALIYGKL	AALIYGKL	AALIYGKL2	2	0.00062461	0.00164357	0.00320256	0.00296736	0.00287356	0.00214592	0.00301205	0	1	581.553	227.016	448.799	83.0419	0.695685	24.9659	24.8586	25.0196	37.6599	24.9343	37.6509	DnaJ homolog subfamily C member 10	0.000750188	0.00096432	0.215096	107.606	2.16762	0.581216	0.881942	0.999452	1.19777	0.131306	987.929;47.8179;81.8438;64.029;513.946;24.2818;0;0;0;0;0;0;
Z:\MS_data\7600_ZenoTof\2022\202210\20221012_MS_DC24_VACV_zenoSWATH_thermostability\20221010_MS_zenoSWATH_DC24_VACV_45C_r2-MS_DC24_VACV_zenoSWATH_45C_r2.mzML	20221010_MS_zenoSWATH_DC24_VACV_45C_r2-MS_DC24_VACV_zenoSWATH_45C_r2	45C_r2	Q9DC23	Q9DC23	DJC10_MOUSE	Dnajc10	604.66	399.811	279.318	604.66	399.811	279.318	279.318	AALIYGKL	AALIYGKL	AALIYGKL2	2	0.000761615	0.0293071	0.00320256	0.00342466	0.00330033	0.00214592	0.00348432	0	1	604.66	399.811	500.015	283.808	0.779598	24.9662	24.8051	25.0198	37.6599	24.9451	37.5574	DnaJ homolog subfamily C member 10	0.000750188	0.00096432	0.509331	343.204	1.54041	0.348575	0.184055	0.993624	0	-10000000	333.603;522.854;0;48.8501;148.145;0;0;103.17;0;0;0;0;
Z:\MS_data\7600_ZenoTof\2022\202210\20221012_MS_DC24_VACV_zenoSWATH_thermostability\20221010_MS_zenoSWATH_DC24_VACV_45C_r3-MS_DC24_VACV_zenoSWATH_45C_r3.mzML	20221010_MS_zenoSWATH_DC24_VACV_45C_r3-MS_DC24_VACV_zenoSWATH_45C_r3	45C_r3	Q9DC23	Q9DC23	DJC10_MOUSE	Dnajc10	678.678	278.154	116.47	678.678	278.154	116.47	116.47	AALIYGKL	AALIYGKL	AALIYGKL2	2	0.000587889	0.00982574	0.00320256	0.00304878	0.00294985	0.00214592	0.00308642	0	1	678.678	278.154	520.218	259.975	0.764412	24.9394	24.8052	25.0467	37.6599	24.9537	37.578	DnaJ homolog subfamily C member 10	0.000750188	0.00096432	0.536389	339.165	1.9029	0.176823	0.766867	0.996962	0.182404	0.209506	457.9;251.161;392.993;48.8505;33.5863;64.9398;0;52.3218;0;0;0;0;
Z:\MS_data\7600_ZenoTof\2022\202210\20221012_MS_DC24_VACV_zenoSWATH_thermostability\20221010_MS_zenoSWATH_DC24_VACV_49C_r2-MS_DC24_VACV_zenoSWATH_49C_r2.mzML	20221010_MS_zenoSWATH_DC24_VACV_49C_r2-MS_DC24_VACV_zenoSWATH_49C_r2	49C_r2	Q9DC23	Q9DC23	DJC10_MOUSE	Dnajc10	222.193	132.87	141.935	222.193	132.87	141.935	141.935	AALIYGKL	AALIYGKL	AALIYGKL2	2	0.000275681	0.000275681	0.00320256	0.00395257	0.00378788	0.00214592	0.00401606	0	1	222.193	132.87	190.767	107.12	0.813771	24.966	24.9123	25.0465	37.6599	24.9502	37.6234	DnaJ homolog subfamily C member 10	0.000750188	0.00096432	0.48092	124.766	3.50285	0.802299	1.19523	0.99993	1.04436	0.271915	266.194;133.889;159.631;89.5004;121.847;129.881;0;103.17;0;118.207;0;0;
Z:\MS_data\7600_ZenoTof\2022\202210\20221012_MS_DC24_VACV_zenoSWATH_thermostability\20221010_MS_zenoSWATH_DC24_VACV_49C_r3-MS_DC24_VACV_zenoSWATH_49C_r3.mzML	20221010_MS_zenoSWATH_DC24_VACV_49C_r3-MS_DC24_VACV_zenoSWATH_49C_r3	49C_r3	Q9DC23	Q9DC23	DJC10_MOUSE	Dnajc10	252.908	195.307	181.882	252.908	195.307	181.882	181.882	AALIYGKL	AALIYGKL	AALIYGKL2	2	0.000940734	0.00660872	0.00320256	0.00446429	0.00425532	0.00214592	0.00454545	0	1	90.5272	69.909	71.7119	51.4961	0.678127	24.8862	24.8325	24.9399	37.6599	24.9633	37.3086	DnaJ homolog subfamily C member 10	0.000750188	0.00096432	0.767143	65.0073	1.85502	0.513631	0.351762	0.998501	0	-10000000	236.786;37.1568;36.2688;48.8504;24.734;0;0;0;0;0;0;0;
Z:\MS_data\7600_ZenoTof\2022\202210\20221012_MS_DC24_VACV_zenoSWATH_thermostability\20221010_MS_zenoSWATH_DC24_VACV_53C_r2-MS_DC24_VACV_zenoSWATH_53C_r2.mzML	20221010_MS_zenoSWATH_DC24_VACV_53C_r2-MS_DC24_VACV_zenoSWATH_53C_r2	53C_r2	Q9DC23	Q9DC23	DJC10_MOUSE	Dnajc10	78.7313	63.2571	74.3812	78.7313	63.2571	74.3812	74.3812	AALIYGKL	AALIYGKL	AALIYGKL2	2	0.00102775	0.0499496	0.00320256	0.0103448	0.0101868	0.00214592	0.0104348	0	1	78.7313	63.2571	60.0977	244.409	0.801784	24.9122	24.8585	24.9659	37.6599	25.0281	37.2067	DnaJ homolog subfamily C member 10	0.000750188	0.00096432	0.627114	320.19	1.68169	0.0776835	0	0.985867	0	-10000000	104.975;0;239.806;0;32.2846;0;0;0;0;0;0;0;
Z:\MS_data\7600_ZenoTof\2022\202210\20221012_MS_DC24_VACV_zenoSWATH_thermostability\20221010_MS_zenoSWATH_DC24_VACV_53C_r3-MS_DC24_VACV_zenoSWATH_53C_r3.mzML	20221010_MS_zenoSWATH_DC24_VACV_53C_r3-MS_DC24_VACV_zenoSWATH_53C_r3	53C_r3	Q9DC23	Q9DC23	DJC10_MOUSE	Dnajc10	39.7168	59.0952	69.4874	39.7168	59.0952	69.4874	69.4874	AALIYGKL	AALIYGKL	AALIYGKL2	2	0.00442478	0.31811	0.00320256	0.0144404	0.0141844	0.00214592	0.0145985	0	1	39.7168	59.0952	44.3429	0	0.57447	24.9122	24.8585	24.9659	37.6599	25.0126	37.2242	DnaJ homolog subfamily C member 10	0.000750188	0.00096432	0	0	1.07935	0.104648	0.811147	0.933898	1.01411	0.600186	122.579;36.2164;0;0;0;73.5983;0;0;0;0;0;0;
Z:\MS_data\7600_ZenoTof\2022\202210\20221012_MS_DC24_VACV_zenoSWATH_thermostability\20221010_MS_zenoSWATH_DC24_VACV_37C_r1-MS_DC24_VACV_zenoSWATH_37C_r1.mzML	20221010_MS_zenoSWATH_DC24_VACV_37C_r1-MS_DC24_VACV_zenoSWATH_37C_r1	37C_r1	Q6PDL0	Q6PDL0	DC1L2_MOUSE	Dync1li2	5456.01	2042.61	2042.61	5456.01	2042.61	2042.61	2042.61	AALIYTSV	AALIYTSV	AALIYTSV2	2	0.000590319	0.000773056	0.00320256	0.00535332	0.00529101	0.0112867	0.00539374	0	1	5456.01	2042.61	3987.63	918.962	0.841852	28.0532	27.8384	28.1337	50.3758	28.1001	50.4234	Cytoplasmic dynein 1 light intermediate chain 2	0.000750188	0.00174825	0.800507	1257.36	3.92455	0.115637	2.63005	0.999748	0	-10000000	2432.45;1729.09;1244.18;3200.03;1172.73;665.117;144.192;0;148.272;0;0;
Z:\MS_data\7600_ZenoTof\2022\202210\20221012_MS_DC24_VACV_zenoSWATH_thermostability\20221010_MS_zenoSWATH_DC24_VACV_37C_r2-MS_DC24_VACV_zenoSWATH_37C_r2.mzML	20221010_MS_zenoSWATH_DC24_VACV_37C_r2-MS_DC24_VACV_zenoSWATH_37C_r2	37C_r2	Q6PDL0	Q6PDL0	DC1L2_MOUSE	Dync1li2	6266.49	3282.14	3282.15	6266.49	3282.14	3282.15	3282.15	AALIYTSV	AALIYTSV	AALIYTSV2	2	0.00013242	0.00013242	0.00320256	0.00538793	0.00532481	0.0112867	0.00542299	0	1	6266.49	3282.14	4571.08	562.827	0.879031	27.9983	27.8372	28.1325	50.3758	28.0522	50.1512	Cytoplasmic dynein 1 light intermediate chain 2	0.000750188	0.00174825	0.869229	771.58	3.90345	0.255716	2.58264	0.999964	0	-10000000	2046.92;1525.8;709.078;2773.31;625.351;508.082;222.434;0;224.216;13.0841;0;
Z:\MS_data\7600_ZenoTof\2022\202210\20221012_MS_DC24_VACV_zenoSWATH_thermostability\20221010_MS_zenoSWATH_DC24_VACV_37C_r3-MS_DC24_VACV_zenoSWATH_37C_r3.mzML	20221010_MS_zenoSWATH_DC24_VACV_37C_r3-MS_DC24_VACV_zenoSWATH_37C_r3	37C_r3	Q6PDL0	Q6PDL0	DC1L2_MOUSE	Dync1li2	2493.1	1138.64	1138.64	2493.1	1138.64	1138.64	1138.64	AALIYTSV	AALIYTSV	AALIYTSV2	2	2.37567e-05	2.37567e-05	0.00320256	0.00554939	0.00548246	0.0112867	0.00447427	0	1	2493.1	1138.64	1905.55	962.409	0.717046	28.079	27.9179	28.1327	50.3758	28.0915	50.4	Cytoplasmic dynein 1 light intermediate chain 2	0.000750188	0.00174825	0.880752	1259.16	4.20057	0.585492	2.82109	0.999993	0	-10000000	1733.67;1272.44;228.646;1023.6;367.705;654.268;112.752;0;81.1103;0;0;
Z:\MS_data\7600_ZenoTof\2022\202210\20221012_MS_DC24_VACV_zenoSWATH_thermostability\20221010_MS_zenoSWATH_DC24_VACV_41C_r1-MS_DC24_VACV_zenoSWATH_41C_r1.mzML	20221010_MS_zenoSWATH_DC24_VACV_41C_r1-MS_DC24_VACV_zenoSWATH_41C_r1	41C_r1	Q6PDL0	Q6PDL0	DC1L2_MOUSE	Dync1li2	5706.13	2440.05	2440.05	5706.13	2440.05	2440.05	2440.05	AALIYTSV	AALIYTSV	AALIYTSV2	2	2.52998e-05	2.52998e-05	0.00320256	0.00638978	0.00631579	0.0112867	0.00643777	0	1	5706.13	2440.05	4442.04	781.145	0.8342	28.0262	27.892	28.1605	50.3758	28.0747	50.4008	Cytoplasmic dynein 1 light intermediate chain 2	0.000750188	0.00174825	0.801822	1003.44	3.7758	0.496475	2.777	0.999991	0	-10000000	1866;1699.34;1243.15;3226.56;787.621;925.94;0;0;584.045;0;0;
Z:\MS_data\7600_ZenoTof\2022\202210\20221012_MS_DC24_VACV_zenoSWATH_thermostability\20221010_MS_zenoSWATH_DC24_VACV_41C_r2-MS_DC24_VACV_zenoSWATH_41C_r2.mzML	20221010_MS_zenoSWATH_DC24_VACV_41C_r2-MS_DC24_VACV_zenoSWATH_41C_r2	41C_r2	Q6PDL0	Q6PDL0	DC1L2_MOUSE	Dync1li2	6904.31	3252.49	3252.49	6904.31	3252.49	3252.49	3252.49	AALIYTSV	AALIYTSV	AALIYTSV2	2	0.000344503	0.000344503	0.00320256	0.00618557	0.00612245	0.0112867	0.00623053	0	1	6904.31	3252.49	4872.34	527.233	0.854859	28.0522	27.8643	28.1863	50.3758	28.0738	50.2844	Cytoplasmic dynein 1 light intermediate chain 2	0.000750188	0.00174825	0.767517	747.111	3.65655	0.173079	2.73499	0.999903	0	-10000000	2303.73;1622.55;515.056;3348.57;462.404;398.378;153.883;0;187.536;0;0;
Z:\MS_data\7600_ZenoTof\2022\202210\20221012_MS_DC24_VACV_zenoSWATH_thermostability\20221010_MS_zenoSWATH_DC24_VACV_41C_r3-MS_DC24_VACV_zenoSWATH_41C_r3.mzML	20221010_MS_zenoSWATH_DC24_VACV_41C_r3-MS_DC24_VACV_zenoSWATH_41C_r3	41C_r3	Q6PDL0	Q6PDL0	DC1L2_MOUSE	Dync1li2	2347.91	1156.34	1156.34	2347.91	1156.34	1156.34	1156.34	AALIYTSV	AALIYTSV	AALIYTSV2	2	0.000160502	0.000160502	0.00320256	0.00448431	0.00442968	0.0112867	0.00451977	0	1	2347.91	1156.34	1795.35	737.992	0.812137	28.0783	27.8368	28.1856	50.3758	28.1147	50.4662	Cytoplasmic dynein 1 light intermediate chain 2	0.000750188	0.00174825	0.853421	965.123	3.21608	0.557347	2.35617	0.999957	0	-10000000	1434.69;1229.9;1174.08;1089.38;283.633;349.322;138.046;0;533.161;0;0;
Z:\MS_data\7600_ZenoTof\2022\202210\20221012_MS_DC24_VACV_zenoSWATH_thermostability\20221010_MS_zenoSWATH_DC24_VACV_45C_r1-MS_DC24_VACV_zenoSWATH_45C_r1.mzML	20221010_MS_zenoSWATH_DC24_VACV_45C_r1-MS_DC24_VACV_zenoSWATH_45C_r1	45C_r1	Q6PDL0	Q6PDL0	DC1L2_MOUSE	Dync1li2	7781.7	3037.68	3037.68	7781.7	3037.68	3037.68	3037.68	AALIYTSV	AALIYTSV	AALIYTSV2	2	0.00062461	0.00119505	0.00320256	0.00445434	0.00440044	0.0112867	0.00448934	0	1	7781.7	3037.68	6005.33	876.378	0.809953	28.0522	27.8911	28.2132	50.3758	28.1007	50.3606	Cytoplasmic dynein 1 light intermediate chain 2	0.000750188	0.00174825	0.88367	1135.61	4.2564	0.314717	3.03916	0.999601	0	-10000000	3026.49;1977;939.439;3476.08;592.806;922.491;199.505;0;382.048;0;0;
Z:\MS_data\7600_ZenoTof\2022\202210\20221012_MS_DC24_VACV_zenoSWATH_thermostability\20221010_MS_zenoSWATH_DC24_VACV_45C_r2-MS_DC24_VACV_zenoSWATH_45C_r2.mzML	20221010_MS_zenoSWATH_DC24_VACV_45C_r2-MS_DC24_VACV_zenoSWATH_45C_r2	45C_r2	Q6PDL0	Q6PDL0	DC1L2_MOUSE	Dync1li2	3927.26	2596.77	2596.77	3927.26	2596.77	2596.77	2596.77	AALIYTSV	AALIYTSV	AALIYTSV2	2	1.96015e-05	1.96015e-05	0.00320256	0.00764331	0.00754717	0.0112867	0.00771208	0	1	3927.26	2596.77	3247.59	645.346	0.856906	28.0525	27.8915	28.1599	50.3758	28.0915	50.1183	Cytoplasmic dynein 1 light intermediate chain 2	0.000750188	0.00174825	0.810017	780.406	4.15137	0.779975	2.99846	0.999996	0	-10000000	1773.81;1421.7;326.86;2013.47;321.601;790.349;89.1144;0;0;0;0;
Z:\MS_data\7600_ZenoTof\2022\202210\20221012_MS_DC24_VACV_zenoSWATH_thermostability\20221010_MS_zenoSWATH_DC24_VACV_45C_r3-MS_DC24_VACV_zenoSWATH_45C_r3.mzML	20221010_MS_zenoSWATH_DC24_VACV_45C_r3-MS_DC24_VACV_zenoSWATH_45C_r3	45C_r3	Q6PDL0	Q6PDL0	DC1L2_MOUSE	Dync1li2	4888.99	2003.74	2003.74	4888.99	2003.74	2003.74	2003.74	AALIYTSV	AALIYTSV	AALIYTSV2	2	0.000123568	0.000123568	0.00320256	0.00461894	0.004561	0.0112867	0.00465116	0	1	4888.99	2003.74	3747.49	1006.53	0.732585	28.0793	27.8377	28.1866	50.3758	28.0709	50.3648	Cytoplasmic dynein 1 light intermediate chain 2	0.000750188	0.00174825	0.842498	1313.12	3.39739	0.195303	2.96728	0.999962	0	-10000000	1975.59;2396.93;1345.14;2881.12;604.333;324.917;10.8735;0;197.093;122.119;0;
Z:\MS_data\7600_ZenoTof\2022\202210\20221012_MS_DC24_VACV_zenoSWATH_thermostability\20221010_MS_zenoSWATH_DC24_VACV_49C_r1-MS_DC24_VACV_zenoSWATH_49C_r1.mzML	20221010_MS_zenoSWATH_DC24_VACV_49C_r1-MS_DC24_VACV_zenoSWATH_49C_r1	49C_r1	Q6PDL0	Q6PDL0	DC1L2_MOUSE	Dync1li2	2762.99	2059.26	2059.26	2762.99	2059.26	2059.26	2059.26	AALIYTSV	AALIYTSV	AALIYTSV2	2	0.000520147	0.000520147	0.00320256	0.00934579	0.00920245	0.0112867	0.00941915	0	1	2762.99	2059.26	2167.69	398.107	0.819303	28.0273	27.8663	28.1615	50.3758	28.0802	50.1998	Cytoplasmic dynein 1 light intermediate chain 2	0.000750188	0.00174825	0.705127	507.436	3.19004	0.545692	2.57404	0.999857	0	-10000000	1247.19;937.768;222.477;1831.41;413.587;27.3643;121.026;0;150.855;73.2709;0;
Z:\MS_data\7600_ZenoTof\2022\202210\20221012_MS_DC24_VACV_zenoSWATH_thermostability\20221010_MS_zenoSWATH_DC24_VACV_49C_r2-MS_DC24_VACV_zenoSWATH_49C_r2.mzML	20221010_MS_zenoSWATH_DC24_VACV_49C_r2-MS_DC24_VACV_zenoSWATH_49C_r2	49C_r2	Q6PDL0	Q6PDL0	DC1L2_MOUSE	Dync1li2	3281.74	1962.46	1962.46	3281.74	1962.46	1962.46	1962.46	AALIYTSV	AALIYTSV	AALIYTSV2	2	0.000857633	0.0015054	0.00320256	0.00815217	0.00803213	0.0112867	0.00823045	0	1	3281.74	1962.46	2817.59	504.203	0.762523	28.0792	27.9182	28.1866	50.3758	28.1201	50.1608	Cytoplasmic dynein 1 light intermediate chain 2	0.000750188	0.00174825	0.56523	587.263	3.37497	0.222101	2.71097	0.999619	0	-10000000	1506.65;1715.15;560.992;1515.03;209.73;845.817;69.0223;0;76.4603;195.389;0;
Z:\MS_data\7600_ZenoTof\2022\202210\20221012_MS_DC24_VACV_zenoSWATH_thermostability\20221010_MS_zenoSWATH_DC24_VACV_49C_r3-MS_DC24_VACV_zenoSWATH_49C_r3.mzML	20221010_MS_zenoSWATH_DC24_VACV_49C_r3-MS_DC24_VACV_zenoSWATH_49C_r3	49C_r3	Q6PDL0	Q6PDL0	DC1L2_MOUSE	Dync1li2	2537.86	1959.85	1959.85	2537.86	1959.85	1959.85	1959.85	AALIYTSV	AALIYTSV	AALIYTSV2	2	0.000940734	0.00636364	0.00320256	0.00857143	0.00843882	0.0112867	0.00865801	0	1	2537.86	1959.85	2010.39	487.606	0.847216	28.0531	27.8652	28.1873	50.3758	28.1014	50.2141	Cytoplasmic dynein 1 light intermediate chain 2	0.000750188	0.00174825	0.533984	615.541	3.03968	0.359689	2.34775	0.998557	0	-10000000	1281.83;1070.47;370.564;1045.88;247.927;270.682;207.068;0;0;0;0;
Z:\MS_data\7600_ZenoTof\2022\202210\20221012_MS_DC24_VACV_zenoSWATH_thermostability\20221010_MS_zenoSWATH_DC24_VACV_53C_r1-MS_DC24_VACV_zenoSWATH_53C_r1.mzML	20221010_MS_zenoSWATH_DC24_VACV_53C_r1-MS_DC24_VACV_zenoSWATH_53C_r1	53C_r1	Q6PDL0	Q6PDL0	DC1L2_MOUSE	Dync1li2	345.074	268.996	268.996	345.074	268.996	268.996	268.996	AALIYTSV	AALIYTSV	AALIYTSV2	2	0.000898473	0.056184	0.00320256	0.00739372	0.00724638	0.0112867	0.00747664	0	1	345.074	268.996	358.104	385.685	0.637143	27.9995	27.8921	28.1874	50.3758	28.0873	49.9901	Cytoplasmic dynein 1 light intermediate chain 2	0.000750188	0.00174825	0.726536	371.652	1.66832	0.122949	1.58944	0.984933	0	-10000000	345.074;472.084;84.5;606.224;131.986;145.941;32.6201;0;0;0;0;
Z:\MS_data\7600_ZenoTof\2022\202210\20221012_MS_DC24_VACV_zenoSWATH_thermostability\20221010_MS_zenoSWATH_DC24_VACV_53C_r2-MS_DC24_VACV_zenoSWATH_53C_r2.mzML	20221010_MS_zenoSWATH_DC24_VACV_53C_r2-MS_DC24_VACV_zenoSWATH_53C_r2	53C_r2	Q6PDL0	Q6PDL0	DC1L2_MOUSE	Dync1li2	1215.41	976.525	976.525	1215.41	976.525	976.525	976.525	AALIYTSV	AALIYTSV	AALIYTSV2	2	0.00102775	0.00505032	0.00320256	0.0103448	0.0101868	0.0112867	0.0104348	0	1	1215.41	976.525	927.752	441.382	0.744989	28.0521	27.9179	28.1863	50.3758	28.0988	50.129	Cytoplasmic dynein 1 light intermediate chain 2	0.000750188	0.00174825	0.930555	578.234	2.74099	0.0470679	1.86487	0.998553	0	-10000000	853.984;722.051;403.819;926.418;385.561;127.453;0;0;0;0;0;
Z:\MS_data\7600_ZenoTof\2022\202210\20221012_MS_DC24_VACV_zenoSWATH_thermostability\20221010_MS_zenoSWATH_DC24_VACV_53C_r3-MS_DC24_VACV_zenoSWATH_53C_r3.mzML	20221010_MS_zenoSWATH_DC24_VACV_53C_r3-MS_DC24_VACV_zenoSWATH_53C_r3	53C_r3	Q6PDL0	Q6PDL0	DC1L2_MOUSE	Dync1li2	857.219	1275.47	1275.47	857.219	1275.47	1275.47	1275.47	AALIYTSV	AALIYTSV	AALIYTSV2	2	0.00117509	0.0450142	0.00320256	0.0111524	0.0109489	0.0112867	0.011257	0	1	857.219	1275.47	957.065	273.194	0.816108	27.9987	27.9181	28.1597	50.3758	28.1296	49.8728	Cytoplasmic dynein 1 light intermediate chain 2	0.000750188	0.00174825	0.233337	244.693	1.85023	0.0335381	0.585551	0.990084	0	-10000000	569.895;509.533;234.645;441.777;0;0;0;0;0;0;0;
Z:\MS_data\7600_ZenoTof\2022\202210\20221012_MS_DC24_VACV_zenoSWATH_thermostability\20221010_MS_zenoSWATH_DC24_VACV_37C_r1-MS_DC24_VACV_zenoSWATH_37C_r1.mzML	20221010_MS_zenoSWATH_DC24_VACV_37C_r1-MS_DC24_VACV_zenoSWATH_37C_r1	37C_r1	Q9JJ28	Q9JJ28	FLII_MOUSE	Flii	25884	9690.4	8896.12	25884	9690.4	8896.12	8896.12	AALKLGQEL	AALKLGQEL	AALKLGQEL2	2	0.000179503	0.000179503	0.00320256	0.00294985	0.00285714	0.00214592	0.00299401	0	1	25884	9690.4	18917.8	9693.17	0.901157	23.4923	23.3044	23.6266	32.2657	23.4715	32.4145	Protein flightless-1 homolog	0.000429342	0.00096432	0.967302	13262.5	5.36744	0.753836	2.65383	0.999942	0	-10000000	17370.7;7608.85;6635.29;8365.32;3048.23;866.967;
Z:\MS_data\7600_ZenoTof\2022\202210\20221012_MS_DC24_VACV_zenoSWATH_thermostability\20221010_MS_zenoSWATH_DC24_VACV_37C_r2-MS_DC24_VACV_zenoSWATH_37C_r2.mzML	20221010_MS_zenoSWATH_DC24_VACV_37C_r2-MS_DC24_VACV_zenoSWATH_37C_r2	37C_r2	Q9JJ28	Q9JJ28	FLII_MOUSE	Flii	19204.9	10058.8	4705.31	19204.9	10058.8	4705.31	4705.31	AALKLGQEL	AALKLGQEL	AALKLGQEL2	2	0.000206666	0.000206666	0.00320256	0.00294985	0.00285714	0.00214592	0.00298507	0	1	19204.9	10058.8	14009	6784.48	0.930748	23.4376	23.2766	23.5718	32.2657	23.464	32.1807	Protein flightless-1 homolog	0.000429342	0.00096432	0.952233	9300.83	5.40048	0.601433	2.43563	0.999943	0	-10000000	12169.8;5330.77;4594.3;6077.76;1578.78;872.53;
Z:\MS_data\7600_ZenoTof\2022\202210\20221012_MS_DC24_VACV_zenoSWATH_thermostability\20221010_MS_zenoSWATH_DC24_VACV_37C_r3-MS_DC24_VACV_zenoSWATH_37C_r3.mzML	20221010_MS_zenoSWATH_DC24_VACV_37C_r3-MS_DC24_VACV_zenoSWATH_37C_r3	37C_r3	Q9JJ28	Q9JJ28	FLII_MOUSE	Flii	18949	8654.31	8991.38	18949	8654.31	8991.38	8991.38	AALKLGQEL	AALKLGQEL	AALKLGQEL2	2	6.40405e-05	6.40405e-05	0.00320256	0.00310559	0.003003	0.00214592	0.00314465	0	1	18949	8654.31	14483.3	7749.78	0.880436	23.5184	23.3037	23.6526	32.2657	23.492	32.4247	Protein flightless-1 homolog	0.000429342	0.00096432	0.988509	10139.3	5.36403	0.525852	2.71915	0.999982	0	-10000000	11507.6;7693.97;4411.33;7132.78;2526.05;596.795;
Z:\MS_data\7600_ZenoTof\2022\202210\20221012_MS_DC24_VACV_zenoSWATH_thermostability\20221010_MS_zenoSWATH_DC24_VACV_41C_r1-MS_DC24_VACV_zenoSWATH_41C_r1.mzML	20221010_MS_zenoSWATH_DC24_VACV_41C_r1-MS_DC24_VACV_zenoSWATH_41C_r1	41C_r1	Q9JJ28	Q9JJ28	FLII_MOUSE	Flii	11662.4	4987.08	4471.81	11662.4	4987.08	4471.81	4471.81	AALKLGQEL	AALKLGQEL	AALKLGQEL2	2	9.31168e-06	9.31168e-06	0.00320256	0.00303951	0.00294118	0.00214592	0.00307692	0	1	11662.4	4987.08	9078.84	8520.75	0.657012	23.5192	23.3313	23.5729	32.2657	23.4615	32.5021	Protein flightless-1 homolog	0.000429342	0.00096432	0.857343	10945.5	4.00318	0.67867	2.28827	0.999997	0	-10000000	13299.7;8159.7;4973.28;5763.93;2718.57;995.045;
Z:\MS_data\7600_ZenoTof\2022\202210\20221012_MS_DC24_VACV_zenoSWATH_thermostability\20221010_MS_zenoSWATH_DC24_VACV_41C_r2-MS_DC24_VACV_zenoSWATH_41C_r2.mzML	20221010_MS_zenoSWATH_DC24_VACV_41C_r2-MS_DC24_VACV_zenoSWATH_41C_r2	41C_r2	Q9JJ28	Q9JJ28	FLII_MOUSE	Flii	18021.7	8489.66	3591.72	18021.7	8489.66	3591.72	3591.72	AALKLGQEL	AALKLGQEL	AALKLGQEL2	2	0.000159712	0.000159712	0.00320256	0.00290698	0.0028169	0.00214592	0.00294985	0	1	18021.7	8489.66	12717.8	6635.48	0.840055	23.4378	23.3305	23.5989	32.2657	23.4499	32.1898	Protein flightless-1 homolog	0.000429342	0.00096432	0.965732	9402.76	5.17581	0.45917	2.56869	0.999955	0	-10000000	13628.1;5585.57;3922.59;6038.22;1681.88;660.74;
Z:\MS_data\7600_ZenoTof\2022\202210\20221012_MS_DC24_VACV_zenoSWATH_thermostability\20221010_MS_zenoSWATH_DC24_VACV_41C_r3-MS_DC24_VACV_zenoSWATH_41C_r3.mzML	20221010_MS_zenoSWATH_DC24_VACV_41C_r3-MS_DC24_VACV_zenoSWATH_41C_r3	41C_r3	Q9JJ28	Q9JJ28	FLII_MOUSE	Flii	20538.7	10115.3	6916.91	20538.7	10115.3	6916.91	6916.91	AALKLGQEL	AALKLGQEL	AALKLGQEL2	2	7.8345e-06	7.8345e-06	0.00320256	0.00284091	0.00275482	0.00214592	0.00288184	0	1	20538.7	10115.3	15705.1	7110.84	0.909757	23.4912	23.3032	23.6522	32.2657	23.4803	32.3581	Protein flightless-1 homolog	0.000429342	0.00096432	0.988787	9299.33	5.69562	0.542537	2.74122	0.999998	0	-10000000	11855.7;7179.14;3920.28;6494.06;2690.3;648.639;
Z:\MS_data\7600_ZenoTof\2022\202210\20221012_MS_DC24_VACV_zenoSWATH_thermostability\20221010_MS_zenoSWATH_DC24_VACV_45C_r1-MS_DC24_VACV_zenoSWATH_45C_r1.mzML	20221010_MS_zenoSWATH_DC24_VACV_45C_r1-MS_DC24_VACV_zenoSWATH_45C_r1	45C_r1	Q9JJ28	Q9JJ28	FLII_MOUSE	Flii	12723.2	4966.67	4310.58	12723.2	4966.67	4310.58	4310.58	AALKLGQEL	AALKLGQEL	AALKLGQEL2	2	0.000101487	0.000101487	0.00320256	0.00296736	0.00287356	0.00214592	0.00301205	0	1	12723.2	4966.67	9818.84	5425.38	0.915098	23.4917	23.3038	23.6259	32.2657	23.4912	32.3379	Protein flightless-1 homolog	0.000429342	0.00096432	0.956398	7030.2	4.66307	0.543903	2.27758	0.999966	0	-10000000	8895.27;5276.09;2420.24;4538.87;1990.69;881.176;
Z:\MS_data\7600_ZenoTof\2022\202210\20221012_MS_DC24_VACV_zenoSWATH_thermostability\20221010_MS_zenoSWATH_DC24_VACV_45C_r2-MS_DC24_VACV_zenoSWATH_45C_r2.mzML	20221010_MS_zenoSWATH_DC24_VACV_45C_r2-MS_DC24_VACV_zenoSWATH_45C_r2	45C_r2	Q9JJ28	Q9JJ28	FLII_MOUSE	Flii	6286.39	4156.66	7390.97	6286.39	4156.66	7390.97	7390.97	AALKLGQEL	AALKLGQEL	AALKLGQEL2	2	4.95485e-05	4.95485e-05	0.00320256	0.00342466	0.00330033	0.00214592	0.00348432	0	1	6286.39	4156.66	5198.44	3587.31	0.721967	23.5187	23.3576	23.5992	32.2657	23.4849	32.3598	Protein flightless-1 homolog	0.000429342	0.00096432	0.949964	4338.08	4.08839	0.512995	2.07984	0.999989	0	-10000000	5363.6;1537.23;1329.62;2443.17;1829.43;431.658;
Z:\MS_data\7600_ZenoTof\2022\202210\20221012_MS_DC24_VACV_zenoSWATH_thermostability\20221010_MS_zenoSWATH_DC24_VACV_45C_r3-MS_DC24_VACV_zenoSWATH_45C_r3.mzML	20221010_MS_zenoSWATH_DC24_VACV_45C_r3-MS_DC24_VACV_zenoSWATH_45C_r3	45C_r3	Q9JJ28	Q9JJ28	FLII_MOUSE	Flii	13044.8	5346.37	6017.06	13044.8	5346.37	6017.06	6017.06	AALKLGQEL	AALKLGQEL	AALKLGQEL2	2	9.47409e-05	9.47409e-05	0.00320256	0.00304878	0.00294985	0.00214592	0.00308642	0	1	13044.8	5346.37	9999.03	4793.17	0.90409	23.4649	23.3039	23.626	32.2657	23.4566	32.2377	Protein flightless-1 homolog	0.000429342	0.00096432	0.974354	6253.18	4.88191	0.64095	2.38156	0.999971	0	-10000000	7302.25;3762.58;2053.8;4078.13;1764.81;696.072;
Z:\MS_data\7600_ZenoTof\2022\202210\20221012_MS_DC24_VACV_zenoSWATH_thermostability\20221010_MS_zenoSWATH_DC24_VACV_49C_r1-MS_DC24_VACV_zenoSWATH_49C_r1.mzML	20221010_MS_zenoSWATH_DC24_VACV_49C_r1-MS_DC24_VACV_zenoSWATH_49C_r1	49C_r1	Q9JJ28	Q9JJ28	FLII_MOUSE	Flii	58.6166	43.687	43.1305	58.6166	43.687	43.1305	43.1305	AALKLGQEL	AALKLGQEL	AALKLGQEL2	2	0.00470958	0.368157	0.00320256	0.012766	0.0125874	0.00214592	0.0128571	0	1	58.6166	43.687	45.9874	78.7895	0.801784	23.4126	23.3589	23.4663	32.2657	23.5339	31.7517	Protein flightless-1 homolog	0.000429342	0.00096432	0.010515	100.427	1.64834	0.205755	1.62139	0.907872	0	-10000000	78.1554;47.4373;75.7447;316.409;0;207.19;
Z:\MS_data\7600_ZenoTof\2022\202210\20221012_MS_DC24_VACV_zenoSWATH_thermostability\20221010_MS_zenoSWATH_DC24_VACV_49C_r2-MS_DC24_VACV_zenoSWATH_49C_r2.mzML	20221010_MS_zenoSWATH_DC24_VACV_49C_r2-MS_DC24_VACV_zenoSWATH_49C_r2	49C_r2	Q9JJ28	Q9JJ28	FLII_MOUSE	Flii	1305.31	780.566	1313.59	1305.31	780.566	1313.59	1313.59	AALKLGQEL	AALKLGQEL	AALKLGQEL2	2	0.000857633	0.00819089	0.00320256	0.00395257	0.00378788	0.00214592	0.00401606	0	1	1305.31	780.566	1120.69	813.623	0.713353	23.5453	23.4916	23.6258	32.2657	23.4834	32.4647	Protein flightless-1 homolog	0.000429342	0.00096432	0.457857	947.655	2.74961	0.420385	1.46994	0.997932	0	-10000000	1484.95;649.601;133.065;593.263;169.114;0;
Z:\MS_data\7600_ZenoTof\2022\202210\20221012_MS_DC24_VACV_zenoSWATH_thermostability\20221010_MS_zenoSWATH_DC24_VACV_49C_r3-MS_DC24_VACV_zenoSWATH_49C_r3.mzML	20221010_MS_zenoSWATH_DC24_VACV_49C_r3-MS_DC24_VACV_zenoSWATH_49C_r3	49C_r3	Q9JJ28	Q9JJ28	FLII_MOUSE	Flii	984.085	759.953	2122.47	984.085	759.953	2122.47	2122.47	AALKLGQEL	AALKLGQEL	AALKLGQEL2	2	0.000940734	0.00139102	0.00320256	0.00446429	0.00425532	0.00214592	0.00454545	0	1	984.085	759.953	779.552	866.15	0.780547	23.4924	23.4387	23.5729	32.2657	23.4769	32.3336	Protein flightless-1 homolog	0.000429342	0.00096432	0.727745	1093.4	3.5602	0.481104	2.10918	0.999684	0	-10000000	708.662;521.247;208.296;627.938;108.649;246.74;
Z:\MS_data\7600_ZenoTof\2022\202210\20221012_MS_DC24_VACV_zenoSWATH_thermostability\20221010_MS_zenoSWATH_DC24_VACV_37C_r1-MS_DC24_VACV_zenoSWATH_37C_r1.mzML	20221010_MS_zenoSWATH_DC24_VACV_37C_r1-MS_DC24_VACV_zenoSWATH_37C_r1	37C_r1	Q6P9Q4	Q6P9Q4	FHOD1_MOUSE	Fhod1	5445.97	2038.85	2038.85	5445.97	2038.85	2038.85	2038.85	AALLNFDEF	AALLNFDEF	AALLNFDEF2	2	0.000590319	0.00329441	0.00307956	0.00535332	0.00529101	0.00401606	0.00539374	0	1	5445.97	2038.85	3980.29	4173.89	0.856965	40.7801	40.5922	40.9143	98.3102	40.5712	99.0818	FH1/FH2 domain-containing protein 1	0.000276256	0.00260417	0.917152	5710.86	4.42278	0.617802	2.32994	0.998928	0	-10000000	3666.47;1622.37;1507.86;1375.13;1055.78;1207.56;
Z:\MS_data\7600_ZenoTof\2022\202210\20221012_MS_DC24_VACV_zenoSWATH_thermostability\20221010_MS_zenoSWATH_DC24_VACV_37C_r2-MS_DC24_VACV_zenoSWATH_37C_r2.mzML	20221010_MS_zenoSWATH_DC24_VACV_37C_r2-MS_DC24_VACV_zenoSWATH_37C_r2	37C_r2	Q6P9Q4	Q6P9Q4	FHOD1_MOUSE	Fhod1	2383.4	1248.33	1248.33	2383.4	1248.33	1248.33	1248.33	AALLNFDEF	AALLNFDEF	AALLNFDEF2	2	0.000575374	0.00113022	0.00307956	0.00507614	0.00493827	0.00401606	0.00512821	0	1	2383.4	1248.33	1738.57	2448.94	0.603613	40.7519	40.6446	40.8861	98.3102	40.5717	98.9746	FH1/FH2 domain-containing protein 1	0.000276256	0.00260417	0.927748	3357.25	4.81446	0.403598	2.56641	0.99969	0.851245	0.0538161	2875.19;1075.17;1133.58;744.563;1001.72;1172.63;
Z:\MS_data\7600_ZenoTof\2022\202210\20221012_MS_DC24_VACV_zenoSWATH_thermostability\20221010_MS_zenoSWATH_DC24_VACV_37C_r3-MS_DC24_VACV_zenoSWATH_37C_r3.mzML	20221010_MS_zenoSWATH_DC24_VACV_37C_r3-MS_DC24_VACV_zenoSWATH_37C_r3	37C_r3	Q6P9Q4	Q6P9Q4	FHOD1_MOUSE	Fhod1	7113.72	3248.95	3248.95	7113.72	3248.95	3248.95	3248.95	AALLNFDEF	AALLNFDEF	AALLNFDEF2	2	0.000196674	0.000196674	0.00307956	0.00554939	0.00548246	0.00401606	0.00447427	0	1	7113.72	3248.95	5437.22	4351.14	0.924903	40.8054	40.5907	40.9127	98.3102	40.614	99.054	FH1/FH2 domain-containing protein 1	0.000276256	0.00260417	0.961193	5692.76	4.99671	0.614207	2.4337	0.999943	0	-10000000	3741.87;1170.6;2492.42;1433.4;877.614;564.673;
Z:\MS_data\7600_ZenoTof\2022\202210\20221012_MS_DC24_VACV_zenoSWATH_thermostability\20221010_MS_zenoSWATH_DC24_VACV_41C_r1-MS_DC24_VACV_zenoSWATH_41C_r1.mzML	20221010_MS_zenoSWATH_DC24_VACV_41C_r1-MS_DC24_VACV_zenoSWATH_41C_r1	41C_r1	Q6P9Q4	Q6P9Q4	FHOD1_MOUSE	Fhod1	3497.12	1495.43	1495.43	3497.12	1495.43	1495.43	1495.43	AALLNFDEF	AALLNFDEF	AALLNFDEF2	2	0.000600601	0.0012548	0.00307956	0.00638978	0.00631579	0.00401606	0.00643777	0	1	3497.12	1495.43	2722.39	3520.23	0.610298	40.7533	40.6191	40.8607	98.3102	40.5882	98.9064	FH1/FH2 domain-containing protein 1	0.000276256	0.00260417	0.951697	4522	3.96725	0.449317	2.11405	0.999574	0	-10000000	2861.09;1433.75;1524.87;1025.05;771.023;733.389;
Z:\MS_data\7600_ZenoTof\2022\202210\20221012_MS_DC24_VACV_zenoSWATH_thermostability\20221010_MS_zenoSWATH_DC24_VACV_41C_r2-MS_DC24_VACV_zenoSWATH_41C_r2.mzML	20221010_MS_zenoSWATH_DC24_VACV_41C_r2-MS_DC24_VACV_zenoSWATH_41C_r2	41C_r2	Q6P9Q4	Q6P9Q4	FHOD1_MOUSE	Fhod1	1974.64	930.217	930.217	1974.64	930.217	930.217	930.217	AALLNFDEF	AALLNFDEF	AALLNFDEF2	2	0.00066313	0.00887933	0.00307956	0.00507614	0.00493827	0.00401606	0.00514139	0	1	1974.64	930.217	1393.5	2532.55	0.473308	40.6983	40.6446	40.8325	98.3102	40.5865	98.7492	FH1/FH2 domain-containing protein 1	0.000276256	0.00260417	0.774049	3588.72	3.24604	0.802102	2.01374	0.997514	1.05795	0.0368885	3354.48;726.199;1157.91;1035.45;562.153;835.941;
Z:\MS_data\7600_ZenoTof\2022\202210\20221012_MS_DC24_VACV_zenoSWATH_thermostability\20221010_MS_zenoSWATH_DC24_VACV_41C_r3-MS_DC24_VACV_zenoSWATH_41C_r3.mzML	20221010_MS_zenoSWATH_DC24_VACV_41C_r3-MS_DC24_VACV_zenoSWATH_41C_r3	41C_r3	Q6P9Q4	Q6P9Q4	FHOD1_MOUSE	Fhod1	2865.89	1411.45	1411.45	2865.89	1411.45	1411.45	1411.45	AALLNFDEF	AALLNFDEF	AALLNFDEF2	2	0.000161621	0.000161621	0.00307956	0.00448431	0.00442968	0.00401606	0.00451977	0	1	2865.89	1411.45	2191.43	2904.75	0.90073	40.7776	40.6434	40.8581	98.3102	40.591	99.0276	FH1/FH2 domain-containing protein 1	0.000276256	0.00260417	0.904577	3798.75	4.18724	0.524669	2.02285	0.999957	0	-10000000	2522.6;941.72;745.957;1030.83;495.657;780.605;
Z:\MS_data\7600_ZenoTof\2022\202210\20221012_MS_DC24_VACV_zenoSWATH_thermostability\20221010_MS_zenoSWATH_DC24_VACV_45C_r1-MS_DC24_VACV_zenoSWATH_45C_r1.mzML	20221010_MS_zenoSWATH_DC24_VACV_45C_r1-MS_DC24_VACV_zenoSWATH_45C_r1	45C_r1	Q6P9Q4	Q6P9Q4	FHOD1_MOUSE	Fhod1	7751.74	3025.99	3025.99	7751.74	3025.99	3025.99	3025.99	AALLNFDEF	AALLNFDEF	AALLNFDEF2	2	0.00062461	0.00105773	0.00307956	0.00445434	0.00440044	0.00401606	0.00448934	0	1	7751.74	3025.99	5982.21	4358.59	0.92689	40.7516	40.5906	40.9127	98.3102	40.5927	98.8868	FH1/FH2 domain-containing protein 1	0.000276256	0.00260417	0.951067	5647.85	5.312	0.602569	2.55956	0.999647	0	-10000000	4073.78;2081.27;1820.75;1252.58;741.33;1058.76;
Z:\MS_data\7600_ZenoTof\2022\202210\20221012_MS_DC24_VACV_zenoSWATH_thermostability\20221010_MS_zenoSWATH_DC24_VACV_45C_r2-MS_DC24_VACV_zenoSWATH_45C_r2.mzML	20221010_MS_zenoSWATH_DC24_VACV_45C_r2-MS_DC24_VACV_zenoSWATH_45C_r2	45C_r2	Q6P9Q4	Q6P9Q4	FHOD1_MOUSE	Fhod1	3839.28	2538.59	2538.59	3839.28	2538.59	2538.59	2538.59	AALLNFDEF	AALLNFDEF	AALLNFDEF2	2	0.000283149	0.000283149	0.00307956	0.00600601	0.00581395	0.00401606	0.00609756	0	1	3839.28	2538.59	3174.84	2737.43	0.85265	40.7793	40.5914	40.9135	98.3102	40.5957	99.0048	FH1/FH2 domain-containing protein 1	0.000276256	0.00260417	0.972145	3310.33	4.14242	0.550089	2.24669	0.999938	0	-10000000	2953.89;1143.88;1139.61;723.751;525.351;697.725;
Z:\MS_data\7600_ZenoTof\2022\202210\20221012_MS_DC24_VACV_zenoSWATH_thermostability\20221010_MS_zenoSWATH_DC24_VACV_45C_r3-MS_DC24_VACV_zenoSWATH_45C_r3.mzML	20221010_MS_zenoSWATH_DC24_VACV_45C_r3-MS_DC24_VACV_zenoSWATH_45C_r3	45C_r3	Q6P9Q4	Q6P9Q4	FHOD1_MOUSE	Fhod1	5743.13	2353.81	2353.81	5743.13	2353.81	2353.81	2353.81	AALLNFDEF	AALLNFDEF	AALLNFDEF2	2	0.000587889	0.0154138	0.00307956	0.00461894	0.004561	0.00401606	0.00465116	0	1	5743.13	2353.81	4402.21	3752.02	0.828224	40.7258	40.6185	40.8869	98.3102	40.6083	98.7533	FH1/FH2 domain-containing protein 1	0.000276256	0.00260417	0.958391	4894.9	4.19461	0.44794	2.15544	0.995242	0	-10000000	3846.75;2072.97;1292.94;1498.61;1780.87;1284.05;
Z:\MS_data\7600_ZenoTof\2022\202210\20221012_MS_DC24_VACV_zenoSWATH_thermostability\20221010_MS_zenoSWATH_DC24_VACV_49C_r1-MS_DC24_VACV_zenoSWATH_49C_r1.mzML	20221010_MS_zenoSWATH_DC24_VACV_49C_r1-MS_DC24_VACV_zenoSWATH_49C_r1	49C_r1	Q6P9Q4	Q6P9Q4	FHOD1_MOUSE	Fhod1	4335.55	3231.29	3231.29	4335.55	3231.29	3231.29	3231.29	AALLNFDEF	AALLNFDEF	AALLNFDEF2	2	0.000897666	0.00344526	0.00307956	0.00934579	0.00920245	0.00401606	0.00941915	0	1	4335.55	3231.29	3401.44	2438.12	0.898359	40.7547	40.6474	40.8889	98.3102	40.5953	98.9327	FH1/FH2 domain-containing protein 1	0.000276256	0.00260417	0.954317	3107.68	4.06887	0.397338	1.7056	0.999051	0	-10000000	2371.46;1589.99;690.828;437.951;773.307;635.258;
Z:\MS_data\7600_ZenoTof\2022\202210\20221012_MS_DC24_VACV_zenoSWATH_thermostability\20221010_MS_zenoSWATH_DC24_VACV_49C_r2-MS_DC24_VACV_zenoSWATH_49C_r2.mzML	20221010_MS_zenoSWATH_DC24_VACV_49C_r2-MS_DC24_VACV_zenoSWATH_49C_r2	49C_r2	Q6P9Q4	Q6P9Q4	FHOD1_MOUSE	Fhod1	4295.85	2568.89	2568.89	4295.85	2568.89	2568.89	2568.89	AALLNFDEF	AALLNFDEF	AALLNFDEF2	2	0.000857633	0.0016457	0.00307956	0.00689655	0.00664452	0.00401606	0.00699301	0	1	4295.85	2568.89	3688.27	3062.93	0.873862	40.8056	40.6446	40.9398	98.3102	40.6075	99.0496	FH1/FH2 domain-containing protein 1	0.000276256	0.00260417	0.926769	3567.51	4.2772	0.681171	2.1665	0.999584	0	-10000000	2326.62;1194.14;971.854;1129.56;241.104;689.607;
Z:\MS_data\7600_ZenoTof\2022\202210\20221012_MS_DC24_VACV_zenoSWATH_thermostability\20221010_MS_zenoSWATH_DC24_VACV_49C_r3-MS_DC24_VACV_zenoSWATH_49C_r3.mzML	20221010_MS_zenoSWATH_DC24_VACV_49C_r3-MS_DC24_VACV_zenoSWATH_49C_r3	49C_r3	Q6P9Q4	Q6P9Q4	FHOD1_MOUSE	Fhod1	2794.26	2157.85	2157.85	2794.26	2157.85	2157.85	2157.85	AALLNFDEF	AALLNFDEF	AALLNFDEF2	2	0.000940734	0.00664794	0.00307956	0.0078125	0.00749064	0.00401606	0.00793651	0	1	2794.26	2157.85	2213.5	2090.8	0.860961	40.726	40.6187	40.9408	98.3102	40.6213	98.6712	FH1/FH2 domain-containing protein 1	0.000276256	0.00260417	0.920173	2639.38	2.98763	0.471218	1.32918	0.998493	0	-10000000	1996.76;559.609;987.573;1037.07;948.422;273.482;
Z:\MS_data\7600_ZenoTof\2022\202210\20221012_MS_DC24_VACV_zenoSWATH_thermostability\20221010_MS_zenoSWATH_DC24_VACV_53C_r1-MS_DC24_VACV_zenoSWATH_53C_r1.mzML	20221010_MS_zenoSWATH_DC24_VACV_53C_r1-MS_DC24_VACV_zenoSWATH_53C_r1	53C_r1	Q6P9Q4	Q6P9Q4	FHOD1_MOUSE	Fhod1	3463.49	2699.91	2699.91	3463.49	2699.91	2699.91	2699.91	AALLNFDEF	AALLNFDEF	AALLNFDEF2	2	9.23851e-05	9.23851e-05	0.00307956	0.00739372	0.00724638	0.00401606	0.00747664	0	1	3463.49	2699.91	3594.28	3145.96	0.863614	40.78	40.5921	40.9142	98.3102	40.6201	98.8916	FH1/FH2 domain-containing protein 1	0.000276256	0.00260417	0.949417	3031.49	4.38405	0.505425	2.33805	0.999975	0	-10000000	2128.91;1250.23;931.149;407.2;512.152;651.979;
Z:\MS_data\7600_ZenoTof\2022\202210\20221012_MS_DC24_VACV_zenoSWATH_thermostability\20221010_MS_zenoSWATH_DC24_VACV_53C_r2-MS_DC24_VACV_zenoSWATH_53C_r2.mzML	20221010_MS_zenoSWATH_DC24_VACV_53C_r2-MS_DC24_VACV_zenoSWATH_53C_r2	53C_r2	Q6P9Q4	Q6P9Q4	FHOD1_MOUSE	Fhod1	2992.55	2404.38	2404.38	2992.55	2404.38	2404.38	2404.38	AALLNFDEF	AALLNFDEF	AALLNFDEF2	2	0.00102775	0.00448597	0.00307956	0.0052356	0.00495049	0.00401606	0.00534759	0	1	2992.55	2404.38	2284.29	1918.34	0.917215	40.7786	40.6981	40.9396	98.3102	40.6273	98.9614	FH1/FH2 domain-containing protein 1	0.000276256	0.00260417	0.936065	2513.13	3.46418	0.374369	1.46208	0.998714	0	-10000000	1994.24;996.307;764.049;710.57;272.574;204.62;
Z:\MS_data\7600_ZenoTof\2022\202210\20221012_MS_DC24_VACV_zenoSWATH_thermostability\20221010_MS_zenoSWATH_DC24_VACV_53C_r3-MS_DC24_VACV_zenoSWATH_53C_r3.mzML	20221010_MS_zenoSWATH_DC24_VACV_53C_r3-MS_DC24_VACV_zenoSWATH_53C_r3	53C_r3	Q6P9Q4	Q6P9Q4	FHOD1_MOUSE	Fhod1	1125.03	1673.95	1673.95	1125.03	1673.95	1673.95	1673.95	AALLNFDEF	AALLNFDEF	AALLNFDEF2	2	0.000867574	0.000867574	0.00307956	0.0111524	0.0109489	0.00401606	0.011257	0	1	1125.03	1673.95	1256.07	1318.86	0.554346	40.7786	40.7249	40.8323	98.3102	40.6248	99.0099	FH1/FH2 domain-containing protein 1	0.000276256	0.00260417	0.715	1181.27	2.95733	0.382856	2.15005	0.999807	0	-10000000	1043.06;420.13;654.214;265.917;180.955;194.538;
Z:\MS_data\7600_ZenoTof\2022\202210\20221012_MS_DC24_VACV_zenoSWATH_thermostability\20221010_MS_zenoSWATH_DC24_VACV_37C_r2-MS_DC24_VACV_zenoSWATH_37C_r2.mzML	20221010_MS_zenoSWATH_DC24_VACV_37C_r2-MS_DC24_VACV_zenoSWATH_37C_r2	37C_r2	P48455	P48455	PP2BC_MOUSE	Ppp3cc	88.7741	46.4965	46.4965	88.7741	46.4965	46.4965	46.4965	AALLNQQFL	AALLNQQFL	AALLNQQFL2	2	0.00745226	0.624346	0.160408	0.0359408	0.0356643	1	0.0361446	0	1	88.7741	46.4965	64.7561	291.544	0.801784	34.7122	34.6585	34.7658	74.9976	34.7636	74.8908	Serine/threonine-protein phosphatase 2B catalytic subunit gamma isoform	0.0136986	0.0257762	0.349517	399.678	1.09737	0.217085	0	0.853655	0	-10000000	64.9077;0;40.0933;0;0;0;0;0;0;0;0;161.158;
Z:\MS_data\7600_ZenoTof\2022\202210\20221012_MS_DC24_VACV_zenoSWATH_thermostability\20221010_MS_zenoSWATH_DC24_VACV_37C_r3-MS_DC24_VACV_zenoSWATH_37C_r3.mzML	20221010_MS_zenoSWATH_DC24_VACV_37C_r3-MS_DC24_VACV_zenoSWATH_37C_r3	37C_r3	P48455	P48455	PP2BC_MOUSE	Ppp3cc	28.7137	13.114	13.114	28.7137	13.114	13.114	13.114	AALLNQQFL	AALLNQQFL	AALLNQQFL2	2	0.000596659	0.0874365	0.160408	0.0383251	0.0380282	1	0.0378301	0	1	28.7137	13.114	21.9467	449.611	0.1438	34.7388	34.6851	34.7925	74.9976	34.7775	74.7508	Serine/threonine-protein phosphatase 2B catalytic subunit gamma isoform	0.0136986	0.0257762	0.539197	588.243	1.282	0.231639	1.62423	0.975393	0	-10000000	88.7379;70.7227;23.1521;194.978;0;19.372;0;0;42.5811;147.769;0;385.252;
Z:\MS_data\7600_ZenoTof\2022\202210\20221012_MS_DC24_VACV_zenoSWATH_thermostability\20221010_MS_zenoSWATH_DC24_VACV_41C_r1-MS_DC24_VACV_zenoSWATH_41C_r1.mzML	20221010_MS_zenoSWATH_DC24_VACV_41C_r1-MS_DC24_VACV_zenoSWATH_41C_r1	41C_r1	P48455	P48455	PP2BC_MOUSE	Ppp3cc	437.955	187.278	187.278	437.955	187.278	187.278	187.278	AALLNQQFL	AALLNQQFL	AALLNQQFL2	2	0.000600601	0.0650502	0.160408	0.0339335	0.033677	1	0.0341463	0	1	437.955	187.278	340.934	445.368	0.689794	34.7401	34.6596	34.7938	74.9976	34.769	74.7467	Serine/threonine-protein phosphatase 2B catalytic subunit gamma isoform	0.0136986	0.0257762	0.360754	572.108	1.58091	0.624915	0	0.978408	0	-10000000	343.348;70.7229;0;278.349;0;0;0;0;265.987;0;0;237.091;
Z:\MS_data\7600_ZenoTof\2022\202210\20221012_MS_DC24_VACV_zenoSWATH_thermostability\20221010_MS_zenoSWATH_DC24_VACV_41C_r2-MS_DC24_VACV_zenoSWATH_41C_r2.mzML	20221010_MS_zenoSWATH_DC24_VACV_41C_r2-MS_DC24_VACV_zenoSWATH_41C_r2	41C_r2	P48455	P48455	PP2BC_MOUSE	Ppp3cc	272.621	128.427	128.427	272.621	128.427	128.427	128.427	AALLNQQFL	AALLNQQFL	AALLNQQFL2	2	0.00259202	0.335195	0.160408	0.037474	0.0378788	1	0.0377095	0	1	272.621	128.427	192.388	322.299	0.818064	34.7391	34.6854	34.7928	74.9976	34.7955	74.8811	Serine/threonine-protein phosphatase 2B catalytic subunit gamma isoform	0.0136986	0.0257762	0.580778	456.711	1.81377	0.585399	0	0.914014	0	-10000000	31.8263;0;86.7745;181.392;0;0;30.533;0;0;0;63.1058;454.578;
Z:\MS_data\7600_ZenoTof\2022\202210\20221012_MS_DC24_VACV_zenoSWATH_thermostability\20221010_MS_zenoSWATH_DC24_VACV_41C_r3-MS_DC24_VACV_zenoSWATH_41C_r3.mzML	20221010_MS_zenoSWATH_DC24_VACV_41C_r3-MS_DC24_VACV_zenoSWATH_41C_r3	41C_r3	P48455	P48455	PP2BC_MOUSE	Ppp3cc	135.896	66.9286	66.9286	135.896	66.9286	66.9286	66.9286	AALLNQQFL	AALLNQQFL	AALLNQQFL2	2	0.00209314	0.196683	0.160408	0.0345324	0.0342612	1	0.0347574	0	1	135.896	66.9286	103.914	133.877	0.766492	34.7648	34.711	34.8184	74.9976	34.7803	74.7941	Serine/threonine-protein phosphatase 2B catalytic subunit gamma isoform	0.0136986	0.0257762	0	175.08	2.13481	0.13633	1.29277	0.950234	0	-10000000	39.9787;0;13.9291;159.818;0;112.28;0;0;647.761;0;0;431.463;
Z:\MS_data\7600_ZenoTof\2022\202210\20221012_MS_DC24_VACV_zenoSWATH_thermostability\20221010_MS_zenoSWATH_DC24_VACV_45C_r1-MS_DC24_VACV_zenoSWATH_45C_r1.mzML	20221010_MS_zenoSWATH_DC24_VACV_45C_r1-MS_DC24_VACV_zenoSWATH_45C_r1	45C_r1	P48455	P48455	PP2BC_MOUSE	Ppp3cc	307.743	120.131	120.131	307.743	120.131	120.131	120.131	AALLNQQFL	AALLNQQFL	AALLNQQFL2	2	0.00114613	0.105849	0.160408	0.0407725	0.0404542	1	0.0410367	0	1	307.743	120.131	237.493	508.383	0.658358	34.7119	34.6583	34.8193	74.9976	34.7756	74.5859	Serine/threonine-protein phosphatase 2B catalytic subunit gamma isoform	0.0136986	0.0257762	0.501116	658.762	1.67341	0.237555	1.52349	0.965892	0	-10000000	363.414;70.7226;0;216.82;106.812;196.491;26.3864;0;0;0;0;118.855;
Z:\MS_data\7600_ZenoTof\2022\202210\20221012_MS_DC24_VACV_zenoSWATH_thermostability\20221010_MS_zenoSWATH_DC24_VACV_45C_r3-MS_DC24_VACV_zenoSWATH_45C_r3.mzML	20221010_MS_zenoSWATH_DC24_VACV_45C_r3-MS_DC24_VACV_zenoSWATH_45C_r3	45C_r3	P48455	P48455	PP2BC_MOUSE	Ppp3cc	108.006	44.266	0	108.006	44.266			AALLNQQFL	AALLNQQFL	AALLNQQFL2	2	0.0118203	1	0.160408	0.0394448	0.0391304	1	0.0389706	0	1	108.006	44.266	82.7885	455.304	0.801784	34.8201	34.7664	34.8738	74.9976	34.7839	75.0109	Serine/threonine-protein phosphatase 2B catalytic subunit gamma isoform	0.0136986	0.0257762	0.681992	593.991	1.30562	0.234545	1.52283	0.708215	0	-10000000	24.1441;0;0;119.864;0;52.977;53.5267;0;117.245;0;0;212.538;
Z:\MS_data\7600_ZenoTof\2022\202210\20221012_MS_DC24_VACV_zenoSWATH_thermostability\20221010_MS_zenoSWATH_DC24_VACV_49C_r2-MS_DC24_VACV_zenoSWATH_49C_r2.mzML	20221010_MS_zenoSWATH_DC24_VACV_49C_r2-MS_DC24_VACV_zenoSWATH_49C_r2	49C_r2	P48455	P48455	PP2BC_MOUSE	Ppp3cc	254.077	151.936	151.936	254.077	151.936	151.936	151.936	AALLNQQFL	AALLNQQFL	AALLNQQFL2	2	0.00616523	0.343978	0.160408	0.0440305	0.0436242	1	0.0443308	0	1	254.077	151.936	218.141	292.664	0.822864	34.7123	34.6049	34.7928	74.9976	34.7874	74.6255	Serine/threonine-protein phosphatase 2B catalytic subunit gamma isoform	0.0136986	0.0257762	0.0788232	340.876	1.07911	0.214664	0.70037	0.919946	0	-10000000	234.699;0;53.4576;12.519;0;0;0;0;16.6241;13.7286;0;59.4274;
Z:\MS_data\7600_ZenoTof\2022\202210\20221012_MS_DC24_VACV_zenoSWATH_thermostability\20221010_MS_zenoSWATH_DC24_VACV_53C_r1-MS_DC24_VACV_zenoSWATH_53C_r1.mzML	20221010_MS_zenoSWATH_DC24_VACV_53C_r1-MS_DC24_VACV_zenoSWATH_53C_r1	53C_r1	P48455	P48455	PP2BC_MOUSE	Ppp3cc	38.9526	30.3648	30.3648	38.9526	30.3648	30.3648	30.3648	AALLNQQFL	AALLNQQFL	AALLNQQFL2	2	0.00177148	0.432265	0.160408	0.0522307	0.0516129	1	0.0526894	0	1	38.9526	30.3648	40.4235	763.239	0.186648	34.7669	34.7132	34.8206	74.9976	34.7933	74.9162	Serine/threonine-protein phosphatase 2B catalytic subunit gamma isoform	0.0136986	0.0257762	0.42326	735.468	1.2468	0.186056	0	0.8947	0	-10000000	126.992;44.0808;0;144.901;0;0;0;0;221.656;0;0;55.0938;
Z:\MS_data\7600_ZenoTof\2022\202210\20221012_MS_DC24_VACV_zenoSWATH_thermostability\20221010_MS_zenoSWATH_DC24_VACV_53C_r2-MS_DC24_VACV_zenoSWATH_53C_r2.mzML	20221010_MS_zenoSWATH_DC24_VACV_53C_r2-MS_DC24_VACV_zenoSWATH_53C_r2	53C_r2	P48455	P48455	PP2BC_MOUSE	Ppp3cc	142.939	114.845	0	142.939	114.845			AALLNQQFL	AALLNQQFL	AALLNQQFL2	2	0.0171527	0.263112	0.160408	0.0526316	0.051963	1	0.0529412	0	1	142.939	114.845	109.109	458.642	0.82858	34.8464	34.7927	34.9001	74.9976	34.8824	74.9405	Serine/threonine-protein phosphatase 2B catalytic subunit gamma isoform	0.0136986	0.0257762	0.431998	600.846	1.23895	0.17194	0.530862	0.929787	0	-10000000	73.2164;0;0;186.988;0;84.2102;0;0;0;0;0;0;
Z:\MS_data\7600_ZenoTof\2022\202210\20221012_MS_DC24_VACV_zenoSWATH_thermostability\20221010_MS_zenoSWATH_DC24_VACV_37C_r1-MS_DC24_VACV_zenoSWATH_37C_r1.mzML	20221010_MS_zenoSWATH_DC24_VACV_37C_r1-MS_DC24_VACV_zenoSWATH_37C_r1	37C_r1	Q91WM3	Q91WM3	U3IP2_MOUSE	Rrp9	52883.6	19798.4	19798.4	52883.6	19798.4	19798.4	19798.4	AALLNTDLV	AALLNTDLV	AALLNTDLV2	2	0.000213174	0.000213174	0.00223214	0.00535332	0.00529101	0.00401606	0.00539374	0	1	52883.6	19798.4	38651	9575.46	0.932567	33.1281	32.9402	33.2623	68.641	32.9922	68.8959	U3 small nucleolar RNA-interacting protein 2	0.000716333	0.00096432	0.857002	13101.5	5.4351	0.51351	3.31932	0.999931	1.39314	0.0684296	26460;17167.8;10435.1;4840.11;6013.6;4513.58;
Z:\MS_data\7600_ZenoTof\2022\202210\20221012_MS_DC24_VACV_zenoSWATH_thermostability\20221010_MS_zenoSWATH_DC24_VACV_37C_r2-MS_DC24_VACV_zenoSWATH_37C_r2.mzML	20221010_MS_zenoSWATH_DC24_VACV_37C_r2-MS_DC24_VACV_zenoSWATH_37C_r2	37C_r2	Q91WM3	Q91WM3	U3IP2_MOUSE	Rrp9	41998.1	21997	21997	41998.1	21997	21997	21997	AALLNTDLV	AALLNTDLV	AALLNTDLV2	2	0.000575374	0.000778812	0.00223214	0.00538793	0.00532481	0.00401606	0.00542299	0	1	41998.1	21997	30635.4	7363.81	0.950609	33.0732	32.8853	33.2342	68.641	32.9606	68.8767	U3 small nucleolar RNA-interacting protein 2	0.000716333	0.00096432	0.812781	10095	5.68113	0.447232	3.27193	0.999786	1.87342	0.27376	20122.2;13498.9;8376.92;4341.37;4728.36;1755.4;
Z:\MS_data\7600_ZenoTof\2022\202210\20221012_MS_DC24_VACV_zenoSWATH_thermostability\20221010_MS_zenoSWATH_DC24_VACV_37C_r3-MS_DC24_VACV_zenoSWATH_37C_r3.mzML	20221010_MS_zenoSWATH_DC24_VACV_37C_r3-MS_DC24_VACV_zenoSWATH_37C_r3	37C_r3	Q91WM3	Q91WM3	U3IP2_MOUSE	Rrp9	41369.6	18894.2	18894.2	41369.6	18894.2	18894.2	18894.2	AALLNTDLV	AALLNTDLV	AALLNTDLV2	2	0.000596659	0.00107578	0.00223214	0.00554939	0.00548246	0.00401606	0.00447427	0	1	41369.6	18894.2	31620	6879.53	0.928335	33.1269	32.939	33.2879	68.641	32.9973	68.764	U3 small nucleolar RNA-interacting protein 2	0.000716333	0.00096432	0.769964	9000.75	5.51888	0.400608	3.42467	0.99969	2.1075	0.176203	21467.2;14407.7;7237.11;4226.37;5811.62;3162.22;
Z:\MS_data\7600_ZenoTof\2022\202210\20221012_MS_DC24_VACV_zenoSWATH_thermostability\20221010_MS_zenoSWATH_DC24_VACV_41C_r1-MS_DC24_VACV_zenoSWATH_41C_r1.mzML	20221010_MS_zenoSWATH_DC24_VACV_41C_r1-MS_DC24_VACV_zenoSWATH_41C_r1	41C_r1	Q91WM3	Q91WM3	U3IP2_MOUSE	Rrp9	57316.5	24509.6	24509.6	57316.5	24509.6	24509.6	24509.6	AALLNTDLV	AALLNTDLV	AALLNTDLV2	2	0.000600601	0.00221907	0.00223214	0.00638978	0.00631579	0.00401606	0.00643777	0	1	57316.5	24509.6	44619.1	9253.82	0.896389	33.1012	32.9401	33.2354	68.641	32.997	68.6261	U3 small nucleolar RNA-interacting protein 2	0.000716333	0.00096432	0.743906	11887.2	5.79463	0.408252	3.48574	0.999248	1.36936	0.134699	28730;18397.1;11000.6;5603.73;6476.1;3841.28;
Z:\MS_data\7600_ZenoTof\2022\202210\20221012_MS_DC24_VACV_zenoSWATH_thermostability\20221010_MS_zenoSWATH_DC24_VACV_41C_r2-MS_DC24_VACV_zenoSWATH_41C_r2.mzML	20221010_MS_zenoSWATH_DC24_VACV_41C_r2-MS_DC24_VACV_zenoSWATH_41C_r2	41C_r2	Q91WM3	Q91WM3	U3IP2_MOUSE	Rrp9	51917.2	24457.2	24457.2	51917.2	24457.2	24457.2	24457.2	AALLNTDLV	AALLNTDLV	AALLNTDLV2	2	0.000470045	0.000470045	0.00223214	0.00618557	0.00612245	0.00401606	0.00623053	0	1	51917.2	24457.2	36637.7	9610.97	0.945768	33.1002	32.9123	33.2612	68.641	33.0129	68.8263	U3 small nucleolar RNA-interacting protein 2	0.000716333	0.00096432	0.904001	13619.1	6.19588	0.434648	3.67837	0.999868	0	-10000000	25646.8;16399.7;10361.9;5037.37;5008.63;2595.27;
Z:\MS_data\7600_ZenoTof\2022\202210\20221012_MS_DC24_VACV_zenoSWATH_thermostability\20221010_MS_zenoSWATH_DC24_VACV_41C_r3-MS_DC24_VACV_zenoSWATH_41C_r3.mzML	20221010_MS_zenoSWATH_DC24_VACV_41C_r3-MS_DC24_VACV_zenoSWATH_41C_r3	41C_r3	Q91WM3	Q91WM3	U3IP2_MOUSE	Rrp9	35877.5	17669.7	17669.7	35877.5	17669.7	17669.7	17669.7	AALLNTDLV	AALLNTDLV	AALLNTDLV2	2	2.68613e-05	2.68613e-05	0.00223214	0.00448431	0.00442968	0.00401606	0.00451977	0	1	35877.5	17669.7	27434.1	7266.41	0.924891	33.126	32.9381	33.2602	68.641	33.0077	68.7538	U3 small nucleolar RNA-interacting protein 2	0.000716333	0.00096432	0.82115	9502.78	5.78763	0.453351	3.65458	0.999993	1.50111	0.240026	18099;11048.9;7072.65;2998.69;4497.4;3649.57;
Z:\MS_data\7600_ZenoTof\2022\202210\20221012_MS_DC24_VACV_zenoSWATH_thermostability\20221010_MS_zenoSWATH_DC24_VACV_45C_r1-MS_DC24_VACV_zenoSWATH_45C_r1.mzML	20221010_MS_zenoSWATH_DC24_VACV_45C_r1-MS_DC24_VACV_zenoSWATH_45C_r1	45C_r1	Q91WM3	Q91WM3	U3IP2_MOUSE	Rrp9	61738.2	24100.3	24100.3	61738.2	24100.3	24100.3	24100.3	AALLNTDLV	AALLNTDLV	AALLNTDLV2	2	0.00062461	0.0016112	0.00223214	0.00445434	0.00440044	0.00401606	0.00448934	0	1	61738.2	24100.3	47644.9	11191.7	0.966024	33.1268	32.9389	33.2609	68.641	32.9653	68.7677	U3 small nucleolar RNA-interacting protein 2	0.000716333	0.00096432	0.867472	14502.1	5.89462	0.388288	3.59774	0.999463	2.11854	0.297245	32261.1;18804.5;11000;6521.3;6025.08;3976.56;
Z:\MS_data\7600_ZenoTof\2022\202210\20221012_MS_DC24_VACV_zenoSWATH_thermostability\20221010_MS_zenoSWATH_DC24_VACV_45C_r2-MS_DC24_VACV_zenoSWATH_45C_r2.mzML	20221010_MS_zenoSWATH_DC24_VACV_45C_r2-MS_DC24_VACV_zenoSWATH_45C_r2	45C_r2	Q91WM3	Q91WM3	U3IP2_MOUSE	Rrp9	34166.1	22591.2	22591.2	34166.1	22591.2	22591.2	22591.2	AALLNTDLV	AALLNTDLV	AALLNTDLV2	2	4.30145e-05	4.30145e-05	0.00223214	0.00764331	0.00754717	0.00401606	0.00771208	0	1	34166.1	22591.2	28253.2	6105.37	0.91578	33.1003	32.9125	33.2614	68.641	33.0013	68.7419	U3 small nucleolar RNA-interacting protein 2	0.000716333	0.00096432	0.718794	7383.13	5.13133	0.529506	3.02636	0.999991	2.45438	0.236221	18191.8;10223.8;6975.46;3587.66;3940.04;2037.36;
Z:\MS_data\7600_ZenoTof\2022\202210\20221012_MS_DC24_VACV_zenoSWATH_thermostability\20221010_MS_zenoSWATH_DC24_VACV_45C_r3-MS_DC24_VACV_zenoSWATH_45C_r3.mzML	20221010_MS_zenoSWATH_DC24_VACV_45C_r3-MS_DC24_VACV_zenoSWATH_45C_r3	45C_r3	Q91WM3	Q91WM3	U3IP2_MOUSE	Rrp9	47440.1	19443.2	19443.2	47440.1	19443.2	19443.2	19443.2	AALLNTDLV	AALLNTDLV	AALLNTDLV2	2	0.000587889	0.0017085	0.00223214	0.00461894	0.004561	0.00401606	0.00465116	0	1	47440.1	19443.2	36363.6	7939.5	0.879975	33.0737	32.9127	33.2616	68.641	32.9989	68.8302	U3 small nucleolar RNA-interacting protein 2	0.000716333	0.00096432	0.567962	10357.9	5.19017	0.457905	3.58314	0.99947	1.84767	0.177655	28041.7;18228.4;10474.3;4157.26;6266.19;3296.59;
Z:\MS_data\7600_ZenoTof\2022\202210\20221012_MS_DC24_VACV_zenoSWATH_thermostability\20221010_MS_zenoSWATH_DC24_VACV_49C_r1-MS_DC24_VACV_zenoSWATH_49C_r1.mzML	20221010_MS_zenoSWATH_DC24_VACV_49C_r1-MS_DC24_VACV_zenoSWATH_49C_r1	49C_r1	Q91WM3	Q91WM3	U3IP2_MOUSE	Rrp9	32875.8	24502.4	24502.4	32875.8	24502.4	24502.4	24502.4	AALLNTDLV	AALLNTDLV	AALLNTDLV2	2	0.000897666	0.00121268	0.00223214	0.00934579	0.00920245	0.00401606	0.00941915	0	1	32875.8	24502.4	25792.6	6934.21	0.829597	33.0488	32.9683	33.2367	68.641	32.9827	68.8333	U3 small nucleolar RNA-interacting protein 2	0.000716333	0.00096432	0.587799	8838.5	5.18067	0.443141	3.33321	0.999666	0	-10000000	20251.3;10943.3;7500.85;3133.06;4936.73;2022.98;
Z:\MS_data\7600_ZenoTof\2022\202210\20221012_MS_DC24_VACV_zenoSWATH_thermostability\20221010_MS_zenoSWATH_DC24_VACV_49C_r2-MS_DC24_VACV_zenoSWATH_49C_r2.mzML	20221010_MS_zenoSWATH_DC24_VACV_49C_r2-MS_DC24_VACV_zenoSWATH_49C_r2	49C_r2	Q91WM3	Q91WM3	U3IP2_MOUSE	Rrp9	42473.7	25399	25399	42473.7	25399	25399	25399	AALLNTDLV	AALLNTDLV	AALLNTDLV2	2	0.000857633	0.00209095	0.00223214	0.00815217	0.00803213	0.00401606	0.00823045	0	1	42473.7	25399	36466.4	6796.93	0.942651	33.1539	32.966	33.2881	68.641	32.9134	69.1662	U3 small nucleolar RNA-interacting protein 2	0.000716333	0.00096432	0.74672	7916.62	5.52447	0.379367	3.57797	0.999471	0	-10000000	21762.8;14303.3;6738.1;2838.68;4096.82;3848.92;
Z:\MS_data\7600_ZenoTof\2022\202210\20221012_MS_DC24_VACV_zenoSWATH_thermostability\20221010_MS_zenoSWATH_DC24_VACV_49C_r3-MS_DC24_VACV_zenoSWATH_49C_r3.mzML	20221010_MS_zenoSWATH_DC24_VACV_49C_r3-MS_DC24_VACV_zenoSWATH_49C_r3	49C_r3	Q91WM3	Q91WM3	U3IP2_MOUSE	Rrp9	33646.1	25983	25983	33646.1	25983	25983	25983	AALLNTDLV	AALLNTDLV	AALLNTDLV2	2	0.000940734	0.00241108	0.00223214	0.00857143	0.00843882	0.00401606	0.00865801	0	1	33646.1	25983	26653	5395.53	0.917589	33.128	32.9938	33.2891	68.641	32.9533	69.2377	U3 small nucleolar RNA-interacting protein 2	0.000716333	0.00096432	0.760973	6811.17	5.66585	0.511643	3.3893	0.999453	1.47776	0.265771	19809.8;9181.24;5339.62;3660.66;3929.32;2256.67;
Z:\MS_data\7600_ZenoTof\2022\202210\20221012_MS_DC24_VACV_zenoSWATH_thermostability\20221010_MS_zenoSWATH_DC24_VACV_53C_r1-MS_DC24_VACV_zenoSWATH_53C_r1.mzML	20221010_MS_zenoSWATH_DC24_VACV_53C_r1-MS_DC24_VACV_zenoSWATH_53C_r1	53C_r1	Q91WM3	Q91WM3	U3IP2_MOUSE	Rrp9	38135.6	29727.9	29727.9	38135.6	29727.9	29727.9	29727.9	AALLNTDLV	AALLNTDLV	AALLNTDLV2	2	6.78654e-05	6.78654e-05	0.00223214	0.00739372	0.00724638	0.00401606	0.00747664	0	1	38135.6	29727.9	39575.6	8433.52	0.936557	33.1011	32.9132	33.2621	68.641	33.0167	69.0303	U3 small nucleolar RNA-interacting protein 2	0.000716333	0.00096432	0.680624	8126.65	5.21851	0.516637	2.90496	0.999982	1.52744	0.534522	20014;12809.3;5668.08;3315.89;4486.68;2199.12;
Z:\MS_data\7600_ZenoTof\2022\202210\20221012_MS_DC24_VACV_zenoSWATH_thermostability\20221010_MS_zenoSWATH_DC24_VACV_53C_r2-MS_DC24_VACV_zenoSWATH_53C_r2.mzML	20221010_MS_zenoSWATH_DC24_VACV_53C_r2-MS_DC24_VACV_zenoSWATH_53C_r2	53C_r2	Q91WM3	Q91WM3	U3IP2_MOUSE	Rrp9	37238.4	29919.4	29919.4	37238.4	29919.4	29919.4	29919.4	AALLNTDLV	AALLNTDLV	AALLNTDLV2	2	0.00102775	0.0048887	0.00223214	0.0103448	0.0101868	0.00401606	0.0104348	0	1	37238.4	29919.4	28425.1	5733.8	0.926945	33.1538	32.939	33.288	68.641	32.9671	69.266	U3 small nucleolar RNA-interacting protein 2	0.000716333	0.00096432	0.652154	7511.59	4.56171	0.55802	2.84501	0.998599	0	-10000000	17901.2;12367.6;7519.95;3447.24;4948.77;1557.67;
Z:\MS_data\7600_ZenoTof\2022\202210\20221012_MS_DC24_VACV_zenoSWATH_thermostability\20221010_MS_zenoSWATH_DC24_VACV_53C_r3-MS_DC24_VACV_zenoSWATH_53C_r3.mzML	20221010_MS_zenoSWATH_DC24_VACV_53C_r3-MS_DC24_VACV_zenoSWATH_53C_r3	53C_r3	Q91WM3	Q91WM3	U3IP2_MOUSE	Rrp9	25239.8	37554.6	37554.6	25239.8	37554.6	37554.6	37554.6	AALLNTDLV	AALLNTDLV	AALLNTDLV2	2	0.000826037	0.000826037	0.00223214	0.0111524	0.0109489	0.00401606	0.011257	0	1	25239.8	37554.6	28179.6	6558.51	0.893263	33.1001	32.9122	33.2879	68.641	32.979	68.957	U3 small nucleolar RNA-interacting protein 2	0.000716333	0.00096432	0.802604	5874.29	4.81598	0.472029	2.95692	0.999816	0	-10000000	12459;8148.73;4817.07;1610.36;2940.72;1258.3;
Z:\MS_data\7600_ZenoTof\2022\202210\20221012_MS_DC24_VACV_zenoSWATH_thermostability\20221010_MS_zenoSWATH_DC24_VACV_57C_r1-MS_DC24_VACV_zenoSWATH_57C_r1.mzML	20221010_MS_zenoSWATH_DC24_VACV_57C_r1-MS_DC24_VACV_zenoSWATH_57C_r1	57C_r1	Q91WM3	Q91WM3	U3IP2_MOUSE	Rrp9	14677.2	21723	21723	14677.2	21723	21723	21723	AALLNTDLV	AALLNTDLV	AALLNTDLV2	2	0.000133871	0.000133871	0.00223214	0.0185185	0.0176211	0.00401606	0.0187793	0	1	14677.2	21723	12966.5	3522.35	0.90689	33.1271	32.9392	33.2344	68.641	32.8815	69.3893	U3 small nucleolar RNA-interacting protein 2	0.000716333	0.00096432	0.811334	3987.04	4.25191	0.383282	1.61108	0.999919	0	-10000000	7180.36;4907.09;2897.61;1079.74;1586.41;768.157;
Z:\MS_data\7600_ZenoTof\2022\202210\20221012_MS_DC24_VACV_zenoSWATH_thermostability\20221010_MS_zenoSWATH_DC24_VACV_57C_r2-MS_DC24_VACV_zenoSWATH_57C_r2.mzML	20221010_MS_zenoSWATH_DC24_VACV_57C_r2-MS_DC24_VACV_zenoSWATH_57C_r2	57C_r2	Q91WM3	Q91WM3	U3IP2_MOUSE	Rrp9	8113.09	18642.2	18642.2	8113.09	18642.2	18642.2	18642.2	AALLNTDLV	AALLNTDLV	AALLNTDLV2	2	0.00139109	0.00139109	0.00223214	0.0217391	0.0266667	0.00401606	0.021978	0	1	8113.09	18642.2	8181.17	2484.52	0.902321	33.0472	32.9398	33.3156	68.641	33.0273	68.9167	U3 small nucleolar RNA-interacting protein 2	0.000716333	0.00096432	0.546156	2463.84	3.55196	0.392176	2.36531	0.999267	0	-10000000	6082.75;2556.71;1131.95;723.346;816.73;642.611;
Z:\MS_data\7600_ZenoTof\2022\202210\20221012_MS_DC24_VACV_zenoSWATH_thermostability\20221010_MS_zenoSWATH_DC24_VACV_57C_r3-MS_DC24_VACV_zenoSWATH_57C_r3.mzML	20221010_MS_zenoSWATH_DC24_VACV_57C_r3-MS_DC24_VACV_zenoSWATH_57C_r3	57C_r3	Q91WM3	Q91WM3	U3IP2_MOUSE	Rrp9	7180.61	13147.1	13147.1	7180.61	13147.1	13147.1	13147.1	AALLNTDLV	AALLNTDLV	AALLNTDLV2	2	0.000857143	0.000857143	0.00223214	0.0291262	0.0277778	0.00401606	0.0295567	0	1	7180.61	13147.1	7616.68	2250.63	0.595282	33.1278	33.0204	33.262	68.641	33.1055	68.6522	U3 small nucleolar RNA-interacting protein 2	0.000716333	0.00096432	0.800714	2121.78	3.66185	0.384879	1.92907	0.99949	0	-10000000	7284.5;3521.94;2338.53;665.417;1499.25;610.118;
Z:\MS_data\7600_ZenoTof\2022\202210\20221012_MS_DC24_VACV_zenoSWATH_thermostability\20221010_MS_zenoSWATH_DC24_VACV_61C_r1-MS_DC24_VACV_zenoSWATH_61C_r1.mzML	20221010_MS_zenoSWATH_DC24_VACV_61C_r1-MS_DC24_VACV_zenoSWATH_61C_r1	61C_r1	Q91WM3	Q91WM3	U3IP2_MOUSE	Rrp9	3537.97	2792.86	2792.86	3537.97	2792.86	2792.86	2792.86	AALLNTDLV	AALLNTDLV	AALLNTDLV2	2	0.00361011	0.0405139	0.00223214	0.0471698	0.0490196	0.00401606	0.0480769	0	1	3537.97	2792.86	2244.13	187.497	0.869232	33.1534	32.9387	33.3145	68.641	33.215	68.4404	U3 small nucleolar RNA-interacting protein 2	0.000716333	0.00096432	0.0232366	295.597	1.7396	0.391981	1.91109	0.966197	1.24037	0.472896	2878.56;1029.45;477.55;301.481;196.701;507.313;
Z:\MS_data\7600_ZenoTof\2022\202210\20221012_MS_DC24_VACV_zenoSWATH_thermostability\20221010_MS_zenoSWATH_DC24_VACV_61C_r2-MS_DC24_VACV_zenoSWATH_61C_r2.mzML	20221010_MS_zenoSWATH_DC24_VACV_61C_r2-MS_DC24_VACV_zenoSWATH_61C_r2	61C_r2	Q91WM3	Q91WM3	U3IP2_MOUSE	Rrp9	1213.04	1020.09	1020.09	1213.04	1020.09	1020.09	1020.09	AALLNTDLV	AALLNTDLV	AALLNTDLV2	2	0.00401606	0.0601775	0.00223214	0.0704225	0.0609756	0.00401606	0.0724638	0	1	1213.04	1020.09	771.937	458.234	0.801683	33.127	33.0465	33.3418	68.641	33.1166	68.6837	U3 small nucleolar RNA-interacting protein 2	0.000716333	0.00096432	0.434312	720.079	1.75883	0.523278	0	0.951704	1.06943	0.487651	1304.57;639.667;451.838;287.7;365.168;67.766;
Z:\MS_data\7600_ZenoTof\2022\202210\20221012_MS_DC24_VACV_zenoSWATH_thermostability\20221010_MS_zenoSWATH_DC24_VACV_61C_r3-MS_DC24_VACV_zenoSWATH_61C_r3.mzML	20221010_MS_zenoSWATH_DC24_VACV_61C_r3-MS_DC24_VACV_zenoSWATH_61C_r3	61C_r3	Q91WM3	Q91WM3	U3IP2_MOUSE	Rrp9	1765.48	1890.89	1890.89	1765.48	1890.89	1890.89	1890.89	AALLNTDLV	AALLNTDLV	AALLNTDLV2	2	0.00460829	0.0366473	0.00223214	0.045977	0.0526316	0.00401606	0.0470588	0	1	1765.48	1890.89	1170.18	333.592	0.861838	33.1	32.9658	33.2611	68.641	33.2383	68.2066	U3 small nucleolar RNA-interacting protein 2	0.000716333	0.00096432	0.495928	503.301	2.5316	0.359155	1.31605	0.970088	0	-10000000	1301.21;754.699;314.971;29.7175;135.338;384.774;
Z:\MS_data\7600_ZenoTof\2022\202210\20221012_MS_DC24_VACV_zenoSWATH_thermostability\20221010_MS_zenoSWATH_DC24_VACV_37C_r1-MS_DC24_VACV_zenoSWATH_37C_r1.mzML	20221010_MS_zenoSWATH_DC24_VACV_37C_r1-MS_DC24_VACV_zenoSWATH_37C_r1	37C_r1	Q80SY4	Q80SY4	MIB1_MOUSE	Mib1	605.635	226.736	226.736	605.635	226.736	226.736	226.736	AALNNHVEV	AALNNHVEV	AALNNHVEV2	2	0.00101626	0.0686881	1	0.0566751	0.057536	1	0.0563648	0	1	605.635	226.736	442.639	629.699	0.850808	15.7891	15.7354	15.8696	2.82556	15.8015	2.76573	E3 ubiquitin-protein ligase MIB1	0.0341079	0.0508658	0.769528	861.577	1.98541	0.00217803	1.31571	0.978114	0	-10000000	218.673;236.537;0;498.349;25.8406;0;0;223.082;0;21.1654;121.3;0;
Z:\MS_data\7600_ZenoTof\2022\202210\20221012_MS_DC24_VACV_zenoSWATH_thermostability\20221010_MS_zenoSWATH_DC24_VACV_37C_r2-MS_DC24_VACV_zenoSWATH_37C_r2.mzML	20221010_MS_zenoSWATH_DC24_VACV_37C_r2-MS_DC24_VACV_zenoSWATH_37C_r2	37C_r2	Q80SY4	Q80SY4	MIB1_MOUSE	Mib1	91.4207	47.8826	47.8826	91.4207	47.8826	47.8826	47.8826	AALNNHVEV	AALNNHVEV	AALNNHVEV2	2	0.00111857	0.120472	1	0.0593995	0.0596241	1	0.0597898	0	1	91.4207	47.8826	66.6866	425.584	0.333558	15.7618	15.6544	15.8692	2.82556	15.758	2.82503	E3 ubiquitin-protein ligase MIB1	0.0341079	0.0508658	0.751341	583.433	1.42187	0.222274	1.10288	0.96798	0	-10000000	671.696;236.821;0;179.22;93.0257;0;24.1793;165.77;0;31.8264;24.8823;0;
Z:\MS_data\7600_ZenoTof\2022\202210\20221012_MS_DC24_VACV_zenoSWATH_thermostability\20221010_MS_zenoSWATH_DC24_VACV_37C_r3-MS_DC24_VACV_zenoSWATH_37C_r3.mzML	20221010_MS_zenoSWATH_DC24_VACV_37C_r3-MS_DC24_VACV_zenoSWATH_37C_r3	37C_r3	Q80SY4	Q80SY4	MIB1_MOUSE	Mib1	168.755	77.0729	77.0728	168.755	77.0729	77.0728	77.0728	AALNNHVEV	AALNNHVEV	AALNNHVEV2	2	0.000596659	0.068313	1	0.0571616	0.0567515	1	0.0568783	0	1	168.755	77.0729	128.984	299.869	0.650791	15.7619	15.6546	15.8156	2.82556	15.8174	2.60649	E3 ubiquitin-protein ligase MIB1	0.0341079	0.0508658	0.658216	392.331	1.34905	0.463916	0.354785	0.98067	0	-10000000	356.618;168.755;0;0;641.701;0;10.773;144.476;0;0;0;105.668;
Z:\MS_data\7600_ZenoTof\2022\202210\20221012_MS_DC24_VACV_zenoSWATH_thermostability\20221010_MS_zenoSWATH_DC24_VACV_41C_r1-MS_DC24_VACV_zenoSWATH_41C_r1.mzML	20221010_MS_zenoSWATH_DC24_VACV_41C_r1-MS_DC24_VACV_zenoSWATH_41C_r1	41C_r1	Q80SY4	Q80SY4	MIB1_MOUSE	Mib1	535.036	228.792	228.792	535.036	228.792	228.792	228.792	AALNNHVEV	AALNNHVEV	AALNNHVEV2	2	0.000600601	0.0513378	1	0.0568475	0.0577293	1	0.0572172	0	1	535.036	228.792	416.509	361.601	0.831649	15.8163	15.7626	15.87	2.82556	15.7901	2.91761	E3 ubiquitin-protein ligase MIB1	0.0341079	0.0508658	0.309711	464.503	1.62478	0.50529	1.29562	0.982881	0	-10000000	16.4591;369.857;46.0098;196.311;217.06;0;108.688;0;0;0;0;0;
Z:\MS_data\7600_ZenoTof\2022\202210\20221012_MS_DC24_VACV_zenoSWATH_thermostability\20221010_MS_zenoSWATH_DC24_VACV_41C_r2-MS_DC24_VACV_zenoSWATH_41C_r2.mzML	20221010_MS_zenoSWATH_DC24_VACV_41C_r2-MS_DC24_VACV_zenoSWATH_41C_r2	41C_r2	Q80SY4	Q80SY4	MIB1_MOUSE	Mib1	84.3784	39.749	39.749	84.3784	39.749	39.749	39.749	AALNNHVEV	AALNNHVEV	AALNNHVEV2	2	0.0010543	0.125405	1	0.0575679	0.059088	1	0.0572917	0	1	84.3784	39.749	59.5454	292.527	0.801784	15.7082	15.6545	15.7619	2.82556	15.7791	2.52122	E3 ubiquitin-protein ligase MIB1	0.0341079	0.0508658	0.407744	414.523	1.20215	0.14121	1.81053	0.966	0	-10000000	257.34;84.3784;116.733;18.3124;427.012;239.811;0;0;0;8.77969;0;0;
Z:\MS_data\7600_ZenoTof\2022\202210\20221012_MS_DC24_VACV_zenoSWATH_thermostability\20221010_MS_zenoSWATH_DC24_VACV_41C_r3-MS_DC24_VACV_zenoSWATH_41C_r3.mzML	20221010_MS_zenoSWATH_DC24_VACV_41C_r3-MS_DC24_VACV_zenoSWATH_41C_r3	41C_r3	Q80SY4	Q80SY4	MIB1_MOUSE	Mib1	33.1887	16.3454	16.3454	33.1887	16.3454	16.3454	16.3454	AALNNHVEV	AALNNHVEV	AALNNHVEV2	2	0.00209314	0.181545	1	0.061197	0.0614152	1	0.0616114	0	1	33.1887	16.3454	25.3781	274.629	0.801784	15.7885	15.7347	15.8421	2.82556	15.8012	2.77965	E3 ubiquitin-protein ligase MIB1	0.0341079	0.0508658	0.647231	359.151	1.46154	0.320658	0.370306	0.953887	0	-10000000	221.546;33.1887;0;0;118.866;0;20.8281;0;0;0;129.941;0;
Z:\MS_data\7600_ZenoTof\2022\202210\20221012_MS_DC24_VACV_zenoSWATH_thermostability\20221010_MS_zenoSWATH_DC24_VACV_45C_r1-MS_DC24_VACV_zenoSWATH_45C_r1.mzML	20221010_MS_zenoSWATH_DC24_VACV_45C_r1-MS_DC24_VACV_zenoSWATH_45C_r1	45C_r1	Q80SY4	Q80SY4	MIB1_MOUSE	Mib1	27.9323	10.9037	10.9037	27.9323	10.9037	10.9037	10.9037	AALNNHVEV	AALNNHVEV	AALNNHVEV2	2	0.00062461	0.0353913	1	0.060241	0.0604651	1	0.0599327	0	1	27.9323	10.9037	21.556	739.39	0.565529	15.735	15.6007	15.8692	2.82556	15.81	2.51712	E3 ubiquitin-protein ligase MIB1	0.0341079	0.0508658	0.67973	958.1	1.76984	0.321892	0.673387	0.988331	0	-10000000	1231.31;88.3155;0;262.724;155.042;22.2686;31.3613;84.7755;13.1908;0;0;224.361;
Z:\MS_data\7600_ZenoTof\2022\202210\20221012_MS_DC24_VACV_zenoSWATH_thermostability\20221010_MS_zenoSWATH_DC24_VACV_45C_r2-MS_DC24_VACV_zenoSWATH_45C_r2.mzML	20221010_MS_zenoSWATH_DC24_VACV_45C_r2-MS_DC24_VACV_zenoSWATH_45C_r2	45C_r2	Q80SY4	Q80SY4	MIB1_MOUSE	Mib1	247.789	163.842	163.842	247.789	163.842	163.842	163.842	AALNNHVEV	AALNNHVEV	AALNNHVEV2	2	0.000761615	0.038241	1	0.0562866	0.0565627	1	0.0566593	0	1	247.789	163.842	204.906	306.081	0.801784	15.7621	15.7084	15.8158	2.82556	15.8069	2.65102	E3 ubiquitin-protein ligase MIB1	0.0341079	0.0508658	0.386808	370.139	1.48649	0.464532	0.21653	0.991697	0	-10000000	379.345;247.789;77.8213;71.2976;279.936;0;0;0;0;0;23.6728;0;
Z:\MS_data\7600_ZenoTof\2022\202210\20221012_MS_DC24_VACV_zenoSWATH_thermostability\20221010_MS_zenoSWATH_DC24_VACV_45C_r3-MS_DC24_VACV_zenoSWATH_45C_r3.mzML	20221010_MS_zenoSWATH_DC24_VACV_45C_r3-MS_DC24_VACV_zenoSWATH_45C_r3	45C_r3	Q80SY4	Q80SY4	MIB1_MOUSE	Mib1	227.538	93.2561	0	227.538	93.2561			AALNNHVEV	AALNNHVEV	AALNNHVEV2	2	0.0149254	1	1	0.0655405	0.0657277	1	0.0653061	0	1	227.538	93.2561	174.412	230.542	0.935155	15.8427	15.7622	15.8964	2.82556	15.8257	2.91305	E3 ubiquitin-protein ligase MIB1	0.0341079	0.0508658	0.00993893	300.766	0.578733	0.143692	0.241865	0.665343	0	-10000000	55.6482;227.538;14.4602;71.2966;372.101;0;0;0;0;28.2204;0;0;
Z:\MS_data\7600_ZenoTof\2022\202210\20221012_MS_DC24_VACV_zenoSWATH_thermostability\20221010_MS_zenoSWATH_DC24_VACV_49C_r2-MS_DC24_VACV_zenoSWATH_49C_r2.mzML	20221010_MS_zenoSWATH_DC24_VACV_49C_r2-MS_DC24_VACV_zenoSWATH_49C_r2	49C_r2	Q80SY4	Q80SY4	MIB1_MOUSE	Mib1	306.573	183.329	183.329	306.573	183.329	183.329	183.329	AALNNHVEV	AALNNHVEV	AALNNHVEV2	2	0.00409836	0.213498	1	0.0624506	0.0619122	1	0.0628481	0	1	306.573	183.329	263.213	444.127	0.654728	15.7887	15.735	15.896	2.82556	15.8234	2.68108	E3 ubiquitin-protein ligase MIB1	0.0341079	0.0508658	0.682575	517.29	1.1529	0.453392	0.568044	0.948757	0	-10000000	344.074;306.573;0;265.661;31.4393;86.789;0;56.5166;0;78.7031;22.2904;0;
Z:\MS_data\7600_ZenoTof\2022\202210\20221012_MS_DC24_VACV_zenoSWATH_thermostability\20221010_MS_zenoSWATH_DC24_VACV_49C_r3-MS_DC24_VACV_zenoSWATH_49C_r3.mzML	20221010_MS_zenoSWATH_DC24_VACV_49C_r3-MS_DC24_VACV_zenoSWATH_49C_r3	49C_r3	Q80SY4	Q80SY4	MIB1_MOUSE	Mib1	92.1002	71.1237	71.1237	92.1002	71.1237	71.1237	71.1237	AALNNHVEV	AALNNHVEV	AALNNHVEV2	2	0.00520446	0.479331	1	0.061706	0.0628931	1	0.0603291	0	1	92.1002	71.1237	72.958	203.609	0.628475	15.7623	15.7086	15.816	2.82556	15.8204	2.60378	E3 ubiquitin-protein ligase MIB1	0.0341079	0.0508658	0.285896	257.031	0.996197	0.45417	0.740613	0.901834	0	-10000000	29.7834;84.3783;133.296;71.2973;0;0;0;56.5167;0;0;0;0;
Z:\MS_data\7600_ZenoTof\2022\202210\20221012_MS_DC24_VACV_zenoSWATH_thermostability\20221010_MS_zenoSWATH_DC24_VACV_53C_r1-MS_DC24_VACV_zenoSWATH_53C_r1.mzML	20221010_MS_zenoSWATH_DC24_VACV_53C_r1-MS_DC24_VACV_zenoSWATH_53C_r1	53C_r1	Q80SY4	Q80SY4	MIB1_MOUSE	Mib1	389.625	303.726	303.726	389.625	303.726	303.726	303.726	AALNNHVEV	AALNNHVEV	AALNNHVEV2	2	0.00348129	0.491579	1	0.0618557	0.0621814	1	0.0623701	0	1	389.625	303.726	404.338	224.255	0.801784	15.7893	15.7356	15.843	2.82556	15.8218	2.65004	E3 ubiquitin-protein ligase MIB1	0.0341079	0.0508658	0.0727962	216.095	1.20079	0.00126674	0.810696	0.881957	0	-10000000	0;35.7199;0;362.835;601.436;0;0;0;0;0;0;184.925;
Z:\MS_data\7600_ZenoTof\2022\202210\20221012_MS_DC24_VACV_zenoSWATH_thermostability\20221010_MS_zenoSWATH_DC24_VACV_53C_r2-MS_DC24_VACV_zenoSWATH_53C_r2.mzML	20221010_MS_zenoSWATH_DC24_VACV_53C_r2-MS_DC24_VACV_zenoSWATH_53C_r2	53C_r2	Q80SY4	Q80SY4	MIB1_MOUSE	Mib1	59.0646	47.4558	47.4558	59.0646	47.4558	47.4558	47.4558	AALNNHVEV	AALNNHVEV	AALNNHVEV2	2	0.00102775	0.0594842	1	0.0633188	0.0625674	1	0.063388	0	1	59.0646	47.4558	45.0856	319.047	0.801784	15.7619	15.7082	15.8156	2.82556	15.8297	2.55931	E3 ubiquitin-protein ligase MIB1	0.0341079	0.0508658	0.459404	417.969	1.56368	0.458228	1.62139	0.983214	0	-10000000	304.889;78.7528;0;0;233.857;86.79;270.281;84.7748;0;86.5428;112.661;0;
Z:\MS_data\7600_ZenoTof\2022\202210\20221012_MS_DC24_VACV_zenoSWATH_thermostability\20221010_MS_zenoSWATH_DC24_VACV_53C_r3-MS_DC24_VACV_zenoSWATH_53C_r3.mzML	20221010_MS_zenoSWATH_DC24_VACV_53C_r3-MS_DC24_VACV_zenoSWATH_53C_r3	53C_r3	Q80SY4	Q80SY4	MIB1_MOUSE	Mib1	274.996	409.17	409.17	274.996	409.17	409.17	409.17	AALNNHVEV	AALNNHVEV	AALNNHVEV2	2	0.00117509	0.0808503	1	0.0609137	0.0625782	1	0.0588235	0	1	274.996	409.17	307.026	168.86	0.763006	15.7888	15.7351	15.8425	2.82556	15.7992	2.8037	E3 ubiquitin-protein ligase MIB1	0.0341079	0.0508658	0.286153	151.244	1.52421	0.443576	1.30421	0.982329	0	-10000000	212.144;122.347;137.239;188.255;0;0;139.809;141.293;0;0;199.232;0;
Z:\MS_data\7600_ZenoTof\2022\202210\20221012_MS_DC24_VACV_zenoSWATH_thermostability\20221010_MS_zenoSWATH_DC24_VACV_49C_r3-MS_DC24_VACV_zenoSWATH_49C_r3.mzML	20221010_MS_zenoSWATH_DC24_VACV_49C_r3-MS_DC24_VACV_zenoSWATH_49C_r3	49C_r3	Q922Q8	Q922Q8	LRC59_MOUSE	Lrrc59	39.0434	30.151	30.151	39.0434	30.151	30.151	30.151	AALPKATVL	AALPKATVL	AALPKATVL2	2	0.000940734	0.0620475	0.0106027	0.0279955	0.0298673	0.0227987	0.0282167	0	1	39.0434	30.151	30.9285	74.5782	0.801784	22.1759	22.1223	22.2296	26.1207	21.9747	26.8313	Leucine-rich repeat-containing protein 59	0.00441989	0.00096432	0.726686	94.1454	1.79409	0.440056	0.811147	0.986105	0	-10000000	39.0434;67.105;0;0;0;0;0;0;0;0;0;0;
Z:\MS_data\7600_ZenoTof\2022\202210\20221012_MS_DC24_VACV_zenoSWATH_thermostability\20221010_MS_zenoSWATH_DC24_VACV_57C_r1-MS_DC24_VACV_zenoSWATH_57C_r1.mzML	20221010_MS_zenoSWATH_DC24_VACV_57C_r1-MS_DC24_VACV_zenoSWATH_57C_r1	57C_r1	Q922Q8	Q922Q8	LRC59_MOUSE	Lrrc59	964.292	1427.21	1427.21	964.292	1427.21	1427.21	1427.21	AALPKATVL	AALPKATVL	AALPKATVL2	2	0.00248756	0.0251901	0.0106027	0.0646766	0.06621	0.0227987	0.0636792	0	1	964.292	1427.21	851.903	639.717	0.60788	22.1754	22.0412	22.2827	26.1207	22.0289	26.6971	Leucine-rich repeat-containing protein 59	0.00441989	0.00096432	0.752437	724.113	2.1381	0.106694	1.67928	0.984996	0	-10000000	975.837;209.329;0;94.3818;0;516.182;0;0;187.606;0;0;103.097;
Z:\MS_data\7600_ZenoTof\2022\202210\20221012_MS_DC24_VACV_zenoSWATH_thermostability\20221010_MS_zenoSWATH_DC24_VACV_57C_r2-MS_DC24_VACV_zenoSWATH_57C_r2.mzML	20221010_MS_zenoSWATH_DC24_VACV_57C_r2-MS_DC24_VACV_zenoSWATH_57C_r2	57C_r2	Q922Q8	Q922Q8	LRC59_MOUSE	Lrrc59	315.397	724.717	724.717	315.397	724.717	724.717	724.717	AALPKATVL	AALPKATVL	AALPKATVL2	2	0.00306748	0.0262301	0.0106027	0.0647887	0.0737705	0.0227987	0.0625	0	1	315.397	724.717	318.044	405.703	0.0971281	22.1487	22.095	22.2024	26.1207	22.0057	26.6413	Leucine-rich repeat-containing protein 59	0.00441989	0.00096432	0.75804	402.327	1.78393	0.282836	0.494568	0.986362	0	-10000000	702.041;0;98.1595;0;0;517.791;0;0;445.235;0;0;0;
Z:\MS_data\7600_ZenoTof\2022\202210\20221012_MS_DC24_VACV_zenoSWATH_thermostability\20221010_MS_zenoSWATH_DC24_VACV_57C_r3-MS_DC24_VACV_zenoSWATH_57C_r3.mzML	20221010_MS_zenoSWATH_DC24_VACV_57C_r3-MS_DC24_VACV_zenoSWATH_57C_r3	57C_r3	Q922Q8	Q922Q8	LRC59_MOUSE	Lrrc59	415.379	760.527	760.527	415.379	760.527	760.527	760.527	AALPKATVL	AALPKATVL	AALPKATVL2	2	0.002457	0.0629779	0.0106027	0.0670391	0.0704607	0.0227987	0.0676056	0	1	415.379	760.527	440.605	765.463	0.782278	22.2293	22.0682	22.283	26.1207	22.0219	27.0116	Leucine-rich repeat-containing protein 59	0.00441989	0.00096432	0.572264	721.639	1.63432	0.0843368	0.948083	0.963837	0	-10000000	382.578;192.803;0;58.4789;0;27.6765;0;0;190.438;0;83.7659;0;
Z:\MS_data\7600_ZenoTof\2022\202210\20221012_MS_DC24_VACV_zenoSWATH_thermostability\20221010_MS_zenoSWATH_DC24_VACV_61C_r1-MS_DC24_VACV_zenoSWATH_61C_r1.mzML	20221010_MS_zenoSWATH_DC24_VACV_61C_r1-MS_DC24_VACV_zenoSWATH_61C_r1	61C_r1	Q922Q8	Q922Q8	LRC59_MOUSE	Lrrc59	1364.75	1077.33	1077.33	1364.75	1077.33	1077.33	1077.33	AALPKATVL	AALPKATVL	AALPKATVL2	2	0.00361011	0.0913074	0.0106027	0.0731707	0.0771812	0.0227987	0.0736842	0	1	1364.75	1077.33	865.658	1432.79	0.801474	22.1479	22.0674	22.2552	26.1207	22.0337	26.555	Leucine-rich repeat-containing protein 59	0.00441989	0.00096432	0.748253	2258.86	2.69275	0.300754	1.4611	0.926915	0	-10000000	1152.15;332.272;160.043;378.469;0;604.585;0;0;853.858;0;0;0;
Z:\MS_data\7600_ZenoTof\2022\202210\20221012_MS_DC24_VACV_zenoSWATH_thermostability\20221010_MS_zenoSWATH_DC24_VACV_61C_r2-MS_DC24_VACV_zenoSWATH_61C_r2.mzML	20221010_MS_zenoSWATH_DC24_VACV_61C_r2-MS_DC24_VACV_zenoSWATH_61C_r2	61C_r2	Q922Q8	Q922Q8	LRC59_MOUSE	Lrrc59	346.911	291.731	291.731	346.911	291.731	291.731	291.731	AALPKATVL	AALPKATVL	AALPKATVL2	2	0.00401606	0.180024	0.0106027	0.0781893	0.0748032	0.0227987	0.0788382	0	1	346.911	291.731	220.763	555.845	0.292751	22.202	22.1484	22.3363	26.1207	22.0392	26.7676	Leucine-rich repeat-containing protein 59	0.00441989	0.00096432	0.440057	873.467	1.85473	0.0402827	1.96313	0.868197	0	-10000000	782.828;329.265;160.04;344.602;25.5447;689.495;0;0;0;0;211.927;21.5396;
Z:\MS_data\7600_ZenoTof\2022\202210\20221012_MS_DC24_VACV_zenoSWATH_thermostability\20221010_MS_zenoSWATH_DC24_VACV_61C_r3-MS_DC24_VACV_zenoSWATH_61C_r3.mzML	20221010_MS_zenoSWATH_DC24_VACV_61C_r3-MS_DC24_VACV_zenoSWATH_61C_r3	61C_r3	Q922Q8	Q922Q8	LRC59_MOUSE	Lrrc59	666.192	713.514	0	666.192	713.514			AALPKATVL	AALPKATVL	AALPKATVL2	2	0.0163934	0.473096	0.0106027	0.0717703	0.0818182	0.0227987	0.0728155	0	1	666.192	713.514	441.557	503.706	0.861773	22.1483	22.0946	22.3094	26.1207	22.0088	26.6635	Leucine-rich repeat-containing protein 59	0.00441989	0.00096432	0.705289	759.958	1.45959	0.641686	1.19489	0.715283	0	-10000000	666.192;544.103;702.58;233.287;0;237.533;0;0;417.489;0;657.558;89.105;
Z:\MS_data\7600_ZenoTof\2022\202210\20221012_MS_DC24_VACV_zenoSWATH_thermostability\20221010_MS_zenoSWATH_DC24_VACV_37C_r1-MS_DC24_VACV_zenoSWATH_37C_r1.mzML	20221010_MS_zenoSWATH_DC24_VACV_37C_r1-MS_DC24_VACV_zenoSWATH_37C_r1	37C_r1	Q80VI1	Q80VI1	TRI56_MOUSE	Trim56	11587.2	4338	3937.34	11587.2	4338	3937.34	3937.34	AALQNAVAF	AALQNAVAF	AALQNAVAF2	2	2.10416e-05	2.10416e-05	0.00223214	0.00294985	0.00285714	0.00214592	0.00299401	0	1	11587.2	4338	8468.74	2582.37	0.879056	27.8397	27.6787	27.9739	49.2049	27.7952	49.2423	E3 ubiquitin-protein ligase TRIM56	0.00052173	0.00096432	0.957263	3533.29	4.27859	0.466283	3.34061	0.999993	1.38089	0.908949	3338.98;1164.56;6118.9;284.87;896.308;6077.08;910.77;411.278;650.003;0;458.562;141.57;
Z:\MS_data\7600_ZenoTof\2022\202210\20221012_MS_DC24_VACV_zenoSWATH_thermostability\20221010_MS_zenoSWATH_DC24_VACV_37C_r2-MS_DC24_VACV_zenoSWATH_37C_r2.mzML	20221010_MS_zenoSWATH_DC24_VACV_37C_r2-MS_DC24_VACV_zenoSWATH_37C_r2	37C_r2	Q80VI1	Q80VI1	TRI56_MOUSE	Trim56	9199.82	4818.51	2590.5	9199.82	4818.51	2590.5	2590.5	AALQNAVAF	AALQNAVAF	AALQNAVAF2	2	9.11714e-06	9.11714e-06	0.00223214	0.00294985	0.00285714	0.00214592	0.00298507	0	1	9199.82	4818.51	6710.79	1909.45	0.825879	27.8117	27.6238	27.9727	49.2049	27.7857	49.3816	E3 ubiquitin-protein ligase TRIM56	0.00052173	0.00096432	0.941801	2617.66	3.93321	0.609454	4.06876	0.999997	1.4689	0.965178	3349.97;884.904;3493.51;256.492;352.145;5018.27;500.871;154.654;168.112;0;467.421;118.98;
Z:\MS_data\7600_ZenoTof\2022\202210\20221012_MS_DC24_VACV_zenoSWATH_thermostability\20221010_MS_zenoSWATH_DC24_VACV_37C_r3-MS_DC24_VACV_zenoSWATH_37C_r3.mzML	20221010_MS_zenoSWATH_DC24_VACV_37C_r3-MS_DC24_VACV_zenoSWATH_37C_r3	37C_r3	Q80VI1	Q80VI1	TRI56_MOUSE	Trim56	2400.03	1096.13	1795.35	2400.03	1096.13	1795.35	1795.35	AALQNAVAF	AALQNAVAF	AALQNAVAF2	2	2.27236e-06	2.27236e-06	0.00223214	0.00310559	0.003003	0.00214592	0.00314465	0	1	2400.03	1096.13	1834.41	1667.48	0.499054	27.8119	27.7582	27.9461	49.2049	27.7723	49.0811	E3 ubiquitin-protein ligase TRIM56	0.00052173	0.00096432	0.828637	2181.63	3.40032	0.286292	4.14418	0.999999	0	-10000000	2495.23;999.913;2364.04;104.728;363.09;3368.95;714.096;266.12;50.1103;0;49.0037;179.813;
Z:\MS_data\7600_ZenoTof\2022\202210\20221012_MS_DC24_VACV_zenoSWATH_thermostability\20221010_MS_zenoSWATH_DC24_VACV_41C_r1-MS_DC24_VACV_zenoSWATH_41C_r1.mzML	20221010_MS_zenoSWATH_DC24_VACV_41C_r1-MS_DC24_VACV_zenoSWATH_41C_r1	41C_r1	Q80VI1	Q80VI1	TRI56_MOUSE	Trim56	6707.19	2868.12	2440.3	6707.19	2868.12	2440.3	2440.3	AALQNAVAF	AALQNAVAF	AALQNAVAF2	2	0.00018642	0.00018642	0.00223214	0.00303951	0.00294118	0.00214592	0.00307692	0	1	6707.19	2868.12	5221.33	3140.3	0.714561	27.7859	27.7054	27.9739	49.2049	27.7637	49.0008	E3 ubiquitin-protein ligase TRIM56	0.00052173	0.00096432	0.963767	4033.95	4.04618	0.210586	2.74999	0.999937	1.38913	0.503251	3808.31;1651.08;5798.05;173.556;632.482;5105.39;862.307;266.121;246.781;0;721.673;111.824;
Z:\MS_data\7600_ZenoTof\2022\202210\20221012_MS_DC24_VACV_zenoSWATH_thermostability\20221010_MS_zenoSWATH_DC24_VACV_41C_r2-MS_DC24_VACV_zenoSWATH_41C_r2.mzML	20221010_MS_zenoSWATH_DC24_VACV_41C_r2-MS_DC24_VACV_zenoSWATH_41C_r2	41C_r2	Q80VI1	Q80VI1	TRI56_MOUSE	Trim56	9846.13	4638.32	4151.38	9846.13	4638.32	4151.38	4151.38	AALQNAVAF	AALQNAVAF	AALQNAVAF2	2	1.80518e-05	1.80518e-05	0.00223214	0.00290698	0.0028169	0.00214592	0.00294985	0	1	9846.13	4638.32	6948.37	1981.42	0.810049	27.8656	27.7045	27.9461	49.2049	27.8152	49.5188	E3 ubiquitin-protein ligase TRIM56	0.00052173	0.00096432	0.938696	2807.75	4.81814	0.421931	4.69931	0.999995	0	-10000000	3160.88;1673.82;5279.65;504.676;596.191;5585.11;1206.37;233.686;149.973;0;848.899;215.149;
Z:\MS_data\7600_ZenoTof\2022\202210\20221012_MS_DC24_VACV_zenoSWATH_thermostability\20221010_MS_zenoSWATH_DC24_VACV_41C_r3-MS_DC24_VACV_zenoSWATH_41C_r3.mzML	20221010_MS_zenoSWATH_DC24_VACV_41C_r3-MS_DC24_VACV_zenoSWATH_41C_r3	41C_r3	Q80VI1	Q80VI1	TRI56_MOUSE	Trim56	5652.19	2783.7	3248.13	5652.19	2783.7	3248.13	3248.13	AALQNAVAF	AALQNAVAF	AALQNAVAF2	2	3.80536e-05	3.80536e-05	0.00223214	0.00284091	0.00275482	0.00214592	0.00288184	0	1	5652.19	2783.7	4322.01	1874.92	0.820576	27.8381	27.677	27.9991	49.2049	27.7831	49.5018	E3 ubiquitin-protein ligase TRIM56	0.00052173	0.00096432	0.960408	2451.96	3.60367	0.156622	3.95988	0.99999	1.87079	0.971251	1730.49;1304.28;3308.39;74.4701;461.206;2822.65;834.672;118.634;50.2899;0;398.248;147.382;
Z:\MS_data\7600_ZenoTof\2022\202210\20221012_MS_DC24_VACV_zenoSWATH_thermostability\20221010_MS_zenoSWATH_DC24_VACV_45C_r1-MS_DC24_VACV_zenoSWATH_45C_r1.mzML	20221010_MS_zenoSWATH_DC24_VACV_45C_r1-MS_DC24_VACV_zenoSWATH_45C_r1	45C_r1	Q80VI1	Q80VI1	TRI56_MOUSE	Trim56	16869.4	6585.16	6693.09	16869.4	6585.16	6693.09	6693.09	AALQNAVAF	AALQNAVAF	AALQNAVAF2	2	0.00062461	0.00230354	0.00223214	0.00296736	0.00287356	0.00214592	0.00301205	0	1	16869.4	6585.16	13018.5	3019.96	0.953768	27.8387	27.6777	27.9998	49.2049	27.79	49.4138	E3 ubiquitin-protein ligase TRIM56	0.00052173	0.00096432	0.973713	3913.26	4.30598	0.0668918	3.90832	0.999232	2.62876	0.924096	3393.45;1618.71;7254.73;406.06;286.863;6221.19;531.641;126.161;99.6813;0;988.746;253.393;
Z:\MS_data\7600_ZenoTof\2022\202210\20221012_MS_DC24_VACV_zenoSWATH_thermostability\20221010_MS_zenoSWATH_DC24_VACV_45C_r2-MS_DC24_VACV_zenoSWATH_45C_r2.mzML	20221010_MS_zenoSWATH_DC24_VACV_45C_r2-MS_DC24_VACV_zenoSWATH_45C_r2	45C_r2	Q80VI1	Q80VI1	TRI56_MOUSE	Trim56	7093.38	4690.26	5498.77	7093.38	4690.26	5498.77	5498.77	AALQNAVAF	AALQNAVAF	AALQNAVAF2	2	0.000281787	0.000281787	0.00223214	0.00342466	0.00330033	0.00214592	0.00348432	0	1	7093.38	4690.26	5865.77	1585	0.849496	27.8391	27.7585	28.0002	49.2049	27.8431	49.1163	E3 ubiquitin-protein ligase TRIM56	0.00052173	0.00096432	0.92785	1916.71	3.73317	0.195613	3.63232	0.999938	1.09033	0.93975	1777.71;793.504;3282.05;11.7584;170.697;3163.86;409.895;0;198.466;0;164.54;34.8888;
Z:\MS_data\7600_ZenoTof\2022\202210\20221012_MS_DC24_VACV_zenoSWATH_thermostability\20221010_MS_zenoSWATH_DC24_VACV_45C_r3-MS_DC24_VACV_zenoSWATH_45C_r3.mzML	20221010_MS_zenoSWATH_DC24_VACV_45C_r3-MS_DC24_VACV_zenoSWATH_45C_r3	45C_r3	Q80VI1	Q80VI1	TRI56_MOUSE	Trim56	13176.3	5400.25	6678.13	13176.3	5400.25	6678.13	6678.13	AALQNAVAF	AALQNAVAF	AALQNAVAF2	2	0.000148744	0.000148744	0.00223214	0.00304878	0.00294985	0.00214592	0.00308642	0	1	13176.3	5400.25	10099.8	2440.25	0.913338	27.839	27.6511	28	49.2049	27.7674	49.4712	E3 ubiquitin-protein ligase TRIM56	0.00052173	0.00096432	0.961171	3183.55	4.71138	0.271558	5.84755	0.999954	1.34024	0.954315	2889.77;1561.21;5849.44;231.251;481.367;4714.36;812.844;199.635;174.578;0;513.975;367.228;
Z:\MS_data\7600_ZenoTof\2022\202210\20221012_MS_DC24_VACV_zenoSWATH_thermostability\20221010_MS_zenoSWATH_DC24_VACV_49C_r1-MS_DC24_VACV_zenoSWATH_49C_r1.mzML	20221010_MS_zenoSWATH_DC24_VACV_49C_r1-MS_DC24_VACV_zenoSWATH_49C_r1	49C_r1	Q80VI1	Q80VI1	TRI56_MOUSE	Trim56	9184.22	6845.01	5172.64	9184.22	6845.01	5172.64	5172.64	AALQNAVAF	AALQNAVAF	AALQNAVAF2	2	0.000897666	0.00111834	0.00223214	0.00505051	0.00478469	0.00214592	0.00512821	0	1	9184.22	6845.01	7205.44	1793.03	0.897489	27.8139	27.626	28.0018	49.2049	27.8444	49.0697	E3 ubiquitin-protein ligase TRIM56	0.00052173	0.00096432	0.948518	2285.43	3.72742	0.0742579	4.71972	0.999692	1.68253	0.947953	2258.71;989.856;3830.09;25.8685;384.98;3581.53;697.047;342.284;235.824;0;264.243;286.046;
Z:\MS_data\7600_ZenoTof\2022\202210\20221012_MS_DC24_VACV_zenoSWATH_thermostability\20221010_MS_zenoSWATH_DC24_VACV_49C_r2-MS_DC24_VACV_zenoSWATH_49C_r2.mzML	20221010_MS_zenoSWATH_DC24_VACV_49C_r2-MS_DC24_VACV_zenoSWATH_49C_r2	49C_r2	Q80VI1	Q80VI1	TRI56_MOUSE	Trim56	6724.66	4021.3	5217.81	6724.66	4021.3	5217.81	5217.81	AALQNAVAF	AALQNAVAF	AALQNAVAF2	2	0.000446764	0.000446764	0.00223214	0.00395257	0.00378788	0.00214592	0.00401606	0	1	6724.66	4021.3	5773.55	2064.9	0.825099	27.8658	27.7047	28.0268	49.2049	27.8738	49.2318	E3 ubiquitin-protein ligase TRIM56	0.00052173	0.00096432	0.981562	2405.06	3.91905	0.114826	3.58544	0.999887	1.76982	0.97796	2211.73;1433.29;2747.45;121.818;696.613;3409.16;810.358;284.758;130.754;0;236.537;71.1195;
Z:\MS_data\7600_ZenoTof\2022\202210\20221012_MS_DC24_VACV_zenoSWATH_thermostability\20221010_MS_zenoSWATH_DC24_VACV_49C_r3-MS_DC24_VACV_zenoSWATH_49C_r3.mzML	20221010_MS_zenoSWATH_DC24_VACV_49C_r3-MS_DC24_VACV_zenoSWATH_49C_r3	49C_r3	Q80VI1	Q80VI1	TRI56_MOUSE	Trim56	6854.5	5293.34	5279.15	6854.5	5293.34	5279.15	5279.15	AALQNAVAF	AALQNAVAF	AALQNAVAF2	2	0.000940734	0.00680117	0.00223214	0.00857143	0.00843882	0.00214592	0.00865801	0	1	6854.5	5293.34	5429.85	1527.59	0.907509	27.8934	27.6518	28.0007	49.2049	27.8621	49.3036	E3 ubiquitin-protein ligase TRIM56	0.00052173	0.00096432	0.885159	1928.39	3.91301	0.313976	0	0.998458	1.56348	0.783256	2084.35;875.064;2014.31;74.941;270.35;3115.11;397.159;0;0;0;111.766;0;
Z:\MS_data\7600_ZenoTof\2022\202210\20221012_MS_DC24_VACV_zenoSWATH_thermostability\20221010_MS_zenoSWATH_DC24_VACV_53C_r1-MS_DC24_VACV_zenoSWATH_53C_r1.mzML	20221010_MS_zenoSWATH_DC24_VACV_53C_r1-MS_DC24_VACV_zenoSWATH_53C_r1	53C_r1	Q80VI1	Q80VI1	TRI56_MOUSE	Trim56	6043.02	4710.73	4686.5	6043.02	4710.73	4686.5	4686.5	AALQNAVAF	AALQNAVAF	AALQNAVAF2	2	0.000193314	0.000193314	0.00223214	0.00581395	0.00546448	0.00214592	0.00595238	0	1	6043.02	4710.73	6271.2	1273.58	0.800776	27.8666	27.7861	27.9739	49.2049	27.8294	49.2899	E3 ubiquitin-protein ligase TRIM56	0.00052173	0.00096432	0.909888	1227.24	3.9082	0.173122	4.24268	0.999947	0	-10000000	2282.55;457.209;2992.57;187.509;292.623;2667.09;511.955;155.909;64.2995;0;149.272;120.77;
Z:\MS_data\7600_ZenoTof\2022\202210\20221012_MS_DC24_VACV_zenoSWATH_thermostability\20221010_MS_zenoSWATH_DC24_VACV_53C_r2-MS_DC24_VACV_zenoSWATH_53C_r2.mzML	20221010_MS_zenoSWATH_DC24_VACV_53C_r2-MS_DC24_VACV_zenoSWATH_53C_r2	53C_r2	Q80VI1	Q80VI1	TRI56_MOUSE	Trim56	6063.15	4871.47	4858.42	6063.15	4871.47	4858.42	4858.42	AALQNAVAF	AALQNAVAF	AALQNAVAF2	2	0.00102775	0.00253175	0.00223214	0.0103448	0.0101868	0.00214592	0.0104348	0	1	6063.15	4871.47	4628.17	1744.69	0.824644	27.8386	27.7044	27.9997	49.2049	27.8705	48.9035	E3 ubiquitin-protein ligase TRIM56	0.00052173	0.00096432	0.959498	2285.64	3.68898	0.129451	3.81476	0.999274	0	-10000000	2518.14;1033.59;2760.87;53.1484;339.089;3775.43;543.384;23.4759;100.579;0;120.624;140.45;
Z:\MS_data\7600_ZenoTof\2022\202210\20221012_MS_DC24_VACV_zenoSWATH_thermostability\20221010_MS_zenoSWATH_DC24_VACV_53C_r3-MS_DC24_VACV_zenoSWATH_53C_r3.mzML	20221010_MS_zenoSWATH_DC24_VACV_53C_r3-MS_DC24_VACV_zenoSWATH_53C_r3	53C_r3	Q80VI1	Q80VI1	TRI56_MOUSE	Trim56	3667.55	5457	5442.37	3667.55	5457	5442.37	5442.37	AALQNAVAF	AALQNAVAF	AALQNAVAF2	2	0.000958692	0.000958692	0.00223214	0.0111524	0.0109489	0.00214592	0.011257	0	1	3667.55	5457	4094.73	1438.59	0.788927	27.8389	27.7047	27.9731	49.2049	27.8372	49.1771	E3 ubiquitin-protein ligase TRIM56	0.00052173	0.00096432	0.932419	1288.51	3.30578	0.207777	2.34812	0.999787	0	-10000000	2264.31;450.871;1553.15;13.6398;21.697;1767.58;61.5336;0;13.8297;0;80.2897;161.025;
Z:\MS_data\7600_ZenoTof\2022\202210\20221012_MS_DC24_VACV_zenoSWATH_thermostability\20221010_MS_zenoSWATH_DC24_VACV_57C_r1-MS_DC24_VACV_zenoSWATH_57C_r1.mzML	20221010_MS_zenoSWATH_DC24_VACV_57C_r1-MS_DC24_VACV_zenoSWATH_57C_r1	57C_r1	Q80VI1	Q80VI1	TRI56_MOUSE	Trim56	1026.12	1518.72	1514.65	1026.12	1518.72	1514.65	1514.65	AALQNAVAF	AALQNAVAF	AALQNAVAF2	2	0.00380228	0.103194	0.00223214	0.0213523	0.0206186	0.00214592	0.0215827	0	1	1026.12	1518.72	906.529	327.396	0.842401	27.8926	27.7316	28.0268	49.2049	27.8146	49.5278	E3 ubiquitin-protein ligase TRIM56	0.00052173	0.00096432	0.678625	370.588	2.00327	0.0687826	0	0.941265	0	-10000000	609.087;842.051;603.481;0;0;881.664;207.925;0;125.727;0;122.131;0;
Z:\MS_data\7600_ZenoTof\2022\202210\20221012_MS_DC24_VACV_zenoSWATH_thermostability\20221010_MS_zenoSWATH_DC24_VACV_37C_r1-MS_DC24_VACV_zenoSWATH_37C_r1.mzML	20221010_MS_zenoSWATH_DC24_VACV_37C_r1-MS_DC24_VACV_zenoSWATH_37C_r1	37C_r1	Q9WTK5	Q9WTK5	NFKB2_MOUSE	Nfkb2	73763.3	27615.3	27615.3	73763.3	27615.3	27615.3	27615.3	AALQNLEQL	AALQNLEQL	AALQNLEQL2	2	0.000568407	0.000568407	0.00223214	0.00535332	0.00529101	0.00401606	0.00539374	0	1	73763.3	27615.3	53911.2	28971.3	0.944114	29.7205	29.5863	29.9084	55.8256	29.725	55.8251	Nuclear factor NF-kappa-B p100 subunit	0.000750188	0.00096432	0.98102	39639.6	5.76311	0.782209	4.72325	0.999815	1.39344	0.0913165	27150.1;25732.2;23687.8;21034.3;6574.56;10503;6269.33;13089.9;9489.55;8227.46;7406.22;
Z:\MS_data\7600_ZenoTof\2022\202210\20221012_MS_DC24_VACV_zenoSWATH_thermostability\20221010_MS_zenoSWATH_DC24_VACV_37C_r2-MS_DC24_VACV_zenoSWATH_37C_r2.mzML	20221010_MS_zenoSWATH_DC24_VACV_37C_r2-MS_DC24_VACV_zenoSWATH_37C_r2	37C_r2	Q9WTK5	Q9WTK5	NFKB2_MOUSE	Nfkb2	51453.9	26949.6	26949.6	51453.9	26949.6	26949.6	26949.6	AALQNLEQL	AALQNLEQL	AALQNLEQL2	2	7.85826e-05	7.85826e-05	0.00223214	0.00538793	0.00532481	0.00401606	0.00542299	0	1	51453.9	26949.6	37533	20954.4	0.926842	29.7193	29.5582	29.8535	55.8256	29.7076	55.9097	Nuclear factor NF-kappa-B p100 subunit	0.000750188	0.00096432	0.974688	28726.4	5.86288	0.706152	4.70774	0.999978	0	-10000000	18002.4;17420.8;17038.5;16030.8;7032.74;7285.81;5502.04;10449.2;8699.93;5576.5;5070.17;
Z:\MS_data\7600_ZenoTof\2022\202210\20221012_MS_DC24_VACV_zenoSWATH_thermostability\20221010_MS_zenoSWATH_DC24_VACV_37C_r3-MS_DC24_VACV_zenoSWATH_37C_r3.mzML	20221010_MS_zenoSWATH_DC24_VACV_37C_r3-MS_DC24_VACV_zenoSWATH_37C_r3	37C_r3	Q9WTK5	Q9WTK5	NFKB2_MOUSE	Nfkb2	53375.7	24377.5	24377.5	53375.7	24377.5	24377.5	24377.5	AALQNLEQL	AALQNLEQL	AALQNLEQL2	2	8.26316e-06	8.26316e-06	0.00223214	0.00554939	0.00548246	0.00401606	0.00447427	0	1	53375.7	24377.5	40796.5	22113.3	0.953859	29.7732	29.5585	29.9343	55.8256	29.7258	56.0409	Nuclear factor NF-kappa-B p100 subunit	0.000750188	0.00096432	0.983752	28931.6	5.83777	0.809501	4.65854	0.999998	0	-10000000	20875.7;16405.8;19055.9;16503.1;5747.63;8755.04;4103.39;10453.3;6413.47;6406.28;5814.81;
Z:\MS_data\7600_ZenoTof\2022\202210\20221012_MS_DC24_VACV_zenoSWATH_thermostability\20221010_MS_zenoSWATH_DC24_VACV_41C_r1-MS_DC24_VACV_zenoSWATH_41C_r1.mzML	20221010_MS_zenoSWATH_DC24_VACV_41C_r1-MS_DC24_VACV_zenoSWATH_41C_r1	41C_r1	Q9WTK5	Q9WTK5	NFKB2_MOUSE	Nfkb2	78045.7	33373.8	33373.8	78045.7	33373.8	33373.8	33373.8	AALQNLEQL	AALQNLEQL	AALQNLEQL2	2	0.000233337	0.000233337	0.00223214	0.00638978	0.00631579	0.00401606	0.00643777	0	1	78045.7	33373.8	60756.1	32167.6	0.956019	29.7205	29.5863	29.8815	55.8256	29.7385	55.8607	Nuclear factor NF-kappa-B p100 subunit	0.000750188	0.00096432	0.969093	41321.6	6.27379	0.714312	4.74359	0.999921	0	-10000000	27119.7;28928.1;22384.2;23052.5;7930.81;12562.8;7211.13;14959.2;10001.6;8028.86;6741.13;
Z:\MS_data\7600_ZenoTof\2022\202210\20221012_MS_DC24_VACV_zenoSWATH_thermostability\20221010_MS_zenoSWATH_DC24_VACV_41C_r2-MS_DC24_VACV_zenoSWATH_41C_r2.mzML	20221010_MS_zenoSWATH_DC24_VACV_41C_r2-MS_DC24_VACV_zenoSWATH_41C_r2	41C_r2	Q9WTK5	Q9WTK5	NFKB2_MOUSE	Nfkb2	62267.7	29333.1	29333.1	62267.7	29333.1	29333.1	29333.1	AALQNLEQL	AALQNLEQL	AALQNLEQL2	2	0.00066313	0.000831637	0.00223214	0.00618557	0.00612245	0.00401606	0.00623053	0	1	62267.7	29333.1	43942	22346.3	0.945348	29.7196	29.6122	29.8806	55.8256	29.7299	55.7181	Nuclear factor NF-kappa-B p100 subunit	0.000750188	0.00096432	0.988153	31665.6	5.99325	0.740843	4.74356	0.999767	0	-10000000	23036;22634.8;18404.8;16828.2;6569.73;9901.97;5838.18;9532.54;7429.78;6544.66;4797.09;
Z:\MS_data\7600_ZenoTof\2022\202210\20221012_MS_DC24_VACV_zenoSWATH_thermostability\20221010_MS_zenoSWATH_DC24_VACV_41C_r3-MS_DC24_VACV_zenoSWATH_41C_r3.mzML	20221010_MS_zenoSWATH_DC24_VACV_41C_r3-MS_DC24_VACV_zenoSWATH_41C_r3	41C_r3	Q9WTK5	Q9WTK5	NFKB2_MOUSE	Nfkb2	51485.3	25356.5	25356.5	51485.3	25356.5	25356.5	25356.5	AALQNLEQL	AALQNLEQL	AALQNLEQL2	2	3.58148e-06	3.58148e-06	0.00223214	0.00448431	0.00442968	0.00401606	0.00451977	0	1	51485.3	25356.5	39368.8	21241.2	0.945074	29.7724	29.5846	29.9066	55.8256	29.7535	55.9492	Nuclear factor NF-kappa-B p100 subunit	0.000750188	0.00096432	0.993807	27778.5	6.19349	0.747905	4.70688	0.999999	0	-10000000	18774.5;16547.8;17583.1;17099.9;5703.96;7446.33;4107.95;8701;7040.06;4126.48;3931.09;
Z:\MS_data\7600_ZenoTof\2022\202210\20221012_MS_DC24_VACV_zenoSWATH_thermostability\20221010_MS_zenoSWATH_DC24_VACV_45C_r1-MS_DC24_VACV_zenoSWATH_45C_r1.mzML	20221010_MS_zenoSWATH_DC24_VACV_45C_r1-MS_DC24_VACV_zenoSWATH_45C_r1	45C_r1	Q9WTK5	Q9WTK5	NFKB2_MOUSE	Nfkb2	67690.6	26423.9	26423.8	67690.6	26423.9	26423.8	26423.8	AALQNLEQL	AALQNLEQL	AALQNLEQL2	2	0.00062461	0.000685705	0.00223214	0.00445434	0.00440044	0.00401606	0.00448934	0	1	67690.6	26423.9	52238.5	30106.4	0.962656	29.7463	29.6121	29.9073	55.8256	29.7379	55.9059	Nuclear factor NF-kappa-B p100 subunit	0.000750188	0.00096432	0.995449	39011.9	6.16057	0.641464	4.72553	0.999771	0	-10000000	22766.8;25020.7;22569.1;20110;8863.42;12505.4;8143.03;14418.9;8309.05;7551.3;6054.59;
Z:\MS_data\7600_ZenoTof\2022\202210\20221012_MS_DC24_VACV_zenoSWATH_thermostability\20221010_MS_zenoSWATH_DC24_VACV_45C_r2-MS_DC24_VACV_zenoSWATH_45C_r2.mzML	20221010_MS_zenoSWATH_DC24_VACV_45C_r2-MS_DC24_VACV_zenoSWATH_45C_r2	45C_r2	Q9WTK5	Q9WTK5	NFKB2_MOUSE	Nfkb2	47164.5	31185.9	31185.9	47164.5	31185.9	31185.9	31185.9	AALQNLEQL	AALQNLEQL	AALQNLEQL2	2	1e-09	0	0.00223214	0.00764331	0.00754717	0.00401606	0.00771208	0	1	47164.5	31185.9	39002	19289	0.949873	29.7735	29.6124	29.9077	55.8256	29.7653	55.9399	Nuclear factor NF-kappa-B p100 subunit	0.000750188	0.00096432	0.994915	23325.9	6.23952	0.806899	4.67341	1	0	-10000000	17644.4;17692.2;15149.7;12022.4;4602.44;6081.14;4188.84;9489.87;5957.15;4875.02;4320.42;
Z:\MS_data\7600_ZenoTof\2022\202210\20221012_MS_DC24_VACV_zenoSWATH_thermostability\20221010_MS_zenoSWATH_DC24_VACV_45C_r3-MS_DC24_VACV_zenoSWATH_45C_r3.mzML	20221010_MS_zenoSWATH_DC24_VACV_45C_r3-MS_DC24_VACV_zenoSWATH_45C_r3	45C_r3	Q9WTK5	Q9WTK5	NFKB2_MOUSE	Nfkb2	68996	28277.9	28277.8	68996	28277.9	28277.8	28277.8	AALQNLEQL	AALQNLEQL	AALQNLEQL2	2	8.26319e-06	8.26319e-06	0.00223214	0.00461894	0.004561	0.00401606	0.00465116	0	1	68996	28277.9	52886.6	27871.2	0.917043	29.8004	29.5857	29.9078	55.8256	29.7171	56.1561	Nuclear factor NF-kappa-B p100 subunit	0.000750188	0.00096432	0.986032	36360.8	6.09674	0.853344	4.73936	0.999997	0	-10000000	26311.5;22547.3;21737;21101.6;6658.42;10088.6;5259.66;11777.5;8721.6;7394.65;5944.43;
Z:\MS_data\7600_ZenoTof\2022\202210\20221012_MS_DC24_VACV_zenoSWATH_thermostability\20221010_MS_zenoSWATH_DC24_VACV_49C_r1-MS_DC24_VACV_zenoSWATH_49C_r1.mzML	20221010_MS_zenoSWATH_DC24_VACV_49C_r1-MS_DC24_VACV_zenoSWATH_49C_r1	49C_r1	Q9WTK5	Q9WTK5	NFKB2_MOUSE	Nfkb2	48485.8	36136.5	36136.5	48485.8	36136.5	36136.5	36136.5	AALQNLEQL	AALQNLEQL	AALQNLEQL2	2	0.000140782	0.000140782	0.00223214	0.00934579	0.00920245	0.00401606	0.00941915	0	1	48485.8	36136.5	38039.4	20021.4	0.976052	29.7485	29.5875	29.9095	55.8256	29.7544	55.7555	Nuclear factor NF-kappa-B p100 subunit	0.000750188	0.00096432	0.994984	25519.7	6.57437	0.801153	4.75338	0.999961	0	-10000000	17123.1;16151.8;13034.1;15598;5163.07;7751.06;5079.05;9386.53;5065.23;5879.23;4521.56;
Z:\MS_data\7600_ZenoTof\2022\202210\20221012_MS_DC24_VACV_zenoSWATH_thermostability\20221010_MS_zenoSWATH_DC24_VACV_49C_r2-MS_DC24_VACV_zenoSWATH_49C_r2.mzML	20221010_MS_zenoSWATH_DC24_VACV_49C_r2-MS_DC24_VACV_zenoSWATH_49C_r2	49C_r2	Q9WTK5	Q9WTK5	NFKB2_MOUSE	Nfkb2	49810.6	29786.4	29786.4	49810.6	29786.4	29786.4	29786.4	AALQNLEQL	AALQNLEQL	AALQNLEQL2	2	4.45304e-05	4.45304e-05	0.00223214	0.00815217	0.00803213	0.00401606	0.00823045	0	1	49810.6	29786.4	42765.6	22870.2	0.919621	29.7465	29.6122	29.9075	55.8256	29.7253	55.782	Nuclear factor NF-kappa-B p100 subunit	0.000750188	0.00096432	0.964592	26637.7	5.71421	0.755606	4.50282	0.999989	0	-10000000	19859.3;16984.3;14791.1;15256.9;6003.87;8105.67;5291.34;11982.1;6543.68;5214.04;4676.69;
Z:\MS_data\7600_ZenoTof\2022\202210\20221012_MS_DC24_VACV_zenoSWATH_thermostability\20221010_MS_zenoSWATH_DC24_VACV_49C_r3-MS_DC24_VACV_zenoSWATH_49C_r3.mzML	20221010_MS_zenoSWATH_DC24_VACV_49C_r3-MS_DC24_VACV_zenoSWATH_49C_r3	49C_r3	Q9WTK5	Q9WTK5	NFKB2_MOUSE	Nfkb2	36531.6	28211.3	28211.3	36531.6	28211.3	28211.3	28211.3	AALQNLEQL	AALQNLEQL	AALQNLEQL2	2	0.000940734	0.00480323	0.00223214	0.00857143	0.00843882	0.00401606	0.00865801	0	1	36531.6	28211.3	28938.8	15503.9	0.925679	29.7473	29.6399	29.9084	55.8256	29.7266	55.6367	Nuclear factor NF-kappa-B p100 subunit	0.000750188	0.00096432	0.968791	19571.7	6.0254	0.65314	4.73695	0.99891	0	-10000000	14111.7;13213.4;10258.5;10367.7;3981.53;5508.76;3468.93;10127.7;4862.91;4702.29;3404.85;
Z:\MS_data\7600_ZenoTof\2022\202210\20221012_MS_DC24_VACV_zenoSWATH_thermostability\20221010_MS_zenoSWATH_DC24_VACV_53C_r1-MS_DC24_VACV_zenoSWATH_53C_r1.mzML	20221010_MS_zenoSWATH_DC24_VACV_53C_r1-MS_DC24_VACV_zenoSWATH_53C_r1	53C_r1	Q9WTK5	Q9WTK5	NFKB2_MOUSE	Nfkb2	40672.2	31705.3	31705.3	40672.2	31705.3	31705.3	31705.3	AALQNLEQL	AALQNLEQL	AALQNLEQL2	2	1.51053e-05	1.51053e-05	0.00223214	0.00739372	0.00724638	0.00401606	0.00747664	0	1	40672.2	31705.3	42208	22282.7	0.962412	29.7742	29.64	29.9352	55.8256	29.7432	55.8644	Nuclear factor NF-kappa-B p100 subunit	0.000750188	0.00096432	0.995566	21471.9	6.41275	0.723857	4.64515	0.999996	0	-10000000	14852.1;15490.7;11211.2;10812.6;4170.91;6455.35;3291.91;8121.77;5966.99;4480.81;3161.17;
Z:\MS_data\7600_ZenoTof\2022\202210\20221012_MS_DC24_VACV_zenoSWATH_thermostability\20221010_MS_zenoSWATH_DC24_VACV_53C_r2-MS_DC24_VACV_zenoSWATH_53C_r2.mzML	20221010_MS_zenoSWATH_DC24_VACV_53C_r2-MS_DC24_VACV_zenoSWATH_53C_r2	53C_r2	Q9WTK5	Q9WTK5	NFKB2_MOUSE	Nfkb2	41437.1	33292.9	33292.9	41437.1	33292.9	33292.9	33292.9	AALQNLEQL	AALQNLEQL	AALQNLEQL2	2	0.00102775	0.00217282	0.00223214	0.0103448	0.0101868	0.00401606	0.0104348	0	1	41437.1	33292.9	31630	17805.1	0.944698	29.8	29.639	29.8805	55.8256	29.7922	55.888	Nuclear factor NF-kappa-B p100 subunit	0.000750188	0.00096432	0.983166	23325.7	6.41784	0.603371	4.67806	0.999377	0	-10000000	15943.4;15508.3;12749.4;11625.4;3794.66;6736.48;4000.25;10308.2;5444.01;5119.77;3669.92;
Z:\MS_data\7600_ZenoTof\2022\202210\20221012_MS_DC24_VACV_zenoSWATH_thermostability\20221010_MS_zenoSWATH_DC24_VACV_53C_r3-MS_DC24_VACV_zenoSWATH_53C_r3.mzML	20221010_MS_zenoSWATH_DC24_VACV_53C_r3-MS_DC24_VACV_zenoSWATH_53C_r3	53C_r3	Q9WTK5	Q9WTK5	NFKB2_MOUSE	Nfkb2	26357	39216.9	39216.9	26357	39216.9	39216.9	39216.9	AALQNLEQL	AALQNLEQL	AALQNLEQL2	2	0.000840776	0.000840776	0.00223214	0.0111524	0.0109489	0.00401606	0.011257	0	1	26357	39216.9	29426.9	14521.4	0.903802	29.8001	29.5854	29.9075	55.8256	29.8128	55.788	Nuclear factor NF-kappa-B p100 subunit	0.000750188	0.00096432	0.974089	13006.4	5.57895	0.63913	4.34243	0.999813	0	-10000000	10984.7;9282.52;7585.1;6826.2;2874.4;4392.22;2283.81;6241.76;2069.57;2859.4;2592.11;
Z:\MS_data\7600_ZenoTof\2022\202210\20221012_MS_DC24_VACV_zenoSWATH_thermostability\20221010_MS_zenoSWATH_DC24_VACV_57C_r1-MS_DC24_VACV_zenoSWATH_57C_r1.mzML	20221010_MS_zenoSWATH_DC24_VACV_57C_r1-MS_DC24_VACV_zenoSWATH_57C_r1	57C_r1	Q9WTK5	Q9WTK5	NFKB2_MOUSE	Nfkb2	10206.5	15106.2	15106.1	10206.5	15106.2	15106.1	15106.1	AALQNLEQL	AALQNLEQL	AALQNLEQL2	2	0.000348622	0.000348622	0.00223214	0.0185185	0.0176211	0.00401606	0.0187793	0	1	10206.5	15106.2	9016.91	5734.23	0.884024	29.7733	29.6123	29.9075	55.8256	29.7453	55.8999	Nuclear factor NF-kappa-B p100 subunit	0.000750188	0.00096432	0.945828	6490.73	5.01521	0.778638	3.89305	0.999789	0	-10000000	3347.74;3806.71;3365.35;3545.59;1015.91;1741.72;2107.28;4587.2;1216.53;1146.71;785.003;
Z:\MS_data\7600_ZenoTof\2022\202210\20221012_MS_DC24_VACV_zenoSWATH_thermostability\20221010_MS_zenoSWATH_DC24_VACV_57C_r2-MS_DC24_VACV_zenoSWATH_57C_r2.mzML	20221010_MS_zenoSWATH_DC24_VACV_57C_r2-MS_DC24_VACV_zenoSWATH_57C_r2	57C_r2	Q9WTK5	Q9WTK5	NFKB2_MOUSE	Nfkb2	3871.14	8895.08	8895.08	3871.14	8895.08	8895.08	8895.08	AALQNLEQL	AALQNLEQL	AALQNLEQL2	2	0.00157921	0.00157921	0.00223214	0.0217391	0.0266667	0.00401606	0.021978	0	1	3871.14	8895.08	3903.62	3893.09	0.599941	29.6934	29.6129	29.8545	55.8256	29.7059	55.581	Nuclear factor NF-kappa-B p100 subunit	0.000750188	0.00096432	0.841392	3860.69	3.48835	0.609985	2.94023	0.999168	0	-10000000	2487.63;2175.14;1542.53;1804.15;893.008;772.457;1242.95;2213.68;768.485;615.305;349.216;
Z:\MS_data\7600_ZenoTof\2022\202210\20221012_MS_DC24_VACV_zenoSWATH_thermostability\20221010_MS_zenoSWATH_DC24_VACV_57C_r3-MS_DC24_VACV_zenoSWATH_57C_r3.mzML	20221010_MS_zenoSWATH_DC24_VACV_57C_r3-MS_DC24_VACV_zenoSWATH_57C_r3	57C_r3	Q9WTK5	Q9WTK5	NFKB2_MOUSE	Nfkb2	5204.39	9528.83	9528.83	5204.39	9528.83	9528.83	9528.83	AALQNLEQL	AALQNLEQL	AALQNLEQL2	2	0.000367755	0.000367755	0.00223214	0.0291262	0.0277778	0.00401606	0.0295567	0	1	5204.39	9528.83	5520.45	5765.42	0.774781	29.7471	29.5592	29.935	55.8256	29.7597	55.7572	Nuclear factor NF-kappa-B p100 subunit	0.000750188	0.00096432	0.96441	5435.34	4.2332	0.54427	3.45995	0.999781	1.13064	0.444812	2485.49;3501.01;2612.32;1920.65;866.732;1163.58;2329.91;3410.83;1193.12;618.142;311.035;
Z:\MS_data\7600_ZenoTof\2022\202210\20221012_MS_DC24_VACV_zenoSWATH_thermostability\20221010_MS_zenoSWATH_DC24_VACV_61C_r1-MS_DC24_VACV_zenoSWATH_61C_r1.mzML	20221010_MS_zenoSWATH_DC24_VACV_61C_r1-MS_DC24_VACV_zenoSWATH_61C_r1	61C_r1	Q9WTK5	Q9WTK5	NFKB2_MOUSE	Nfkb2	501.69	396.032	0	501.69	396.032			AALQNLEQL	AALQNLEQL	AALQNLEQL2	2	0.0151057	0.344294	0.00223214	0.0598291	0.0546875	0.00401606	0.0608696	0	1	501.69	396.032	318.222	607.73	0.949613	29.7997	29.7192	29.8534	55.8256	29.6742	56.2374	Nuclear factor NF-kappa-B p100 subunit	0.000750188	0.00096432	0.394924	958.112	1.57015	0.420488	1.38566	0.770825	0.902112	0.464805	307.322;400.099;1659.98;198.849;113.825;12.0967;2665.26;2398.23;267.99;134.172;344.594;
Z:\MS_data\7600_ZenoTof\2022\202210\20221012_MS_DC24_VACV_zenoSWATH_thermostability\20221010_MS_zenoSWATH_DC24_VACV_61C_r2-MS_DC24_VACV_zenoSWATH_61C_r2.mzML	20221010_MS_zenoSWATH_DC24_VACV_61C_r2-MS_DC24_VACV_zenoSWATH_61C_r2	61C_r2	Q9WTK5	Q9WTK5	NFKB2_MOUSE	Nfkb2	727.778	612.017	612.017	727.778	612.017	612.017	612.017	AALQNLEQL	AALQNLEQL	AALQNLEQL2	2	0.00401606	0.178006	0.00223214	0.0704225	0.0609756	0.00401606	0.0724638	0	1	727.778	612.017	463.134	264.488	0.895859	29.8269	29.7464	29.8806	55.8256	29.686	56.2982	Nuclear factor NF-kappa-B p100 subunit	0.000750188	0.00096432	0.558272	415.623	1.90416	0.509366	1.76862	0.869482	0	-10000000	195.641;566.372;764.312;271.993;0;206.601;1270.7;1524.46;0;187.085;71.0098;
Z:\MS_data\7600_ZenoTof\2022\202210\20221012_MS_DC24_VACV_zenoSWATH_thermostability\20221010_MS_zenoSWATH_DC24_VACV_37C_r1-MS_DC24_VACV_zenoSWATH_37C_r1.mzML	20221010_MS_zenoSWATH_DC24_VACV_37C_r1-MS_DC24_VACV_zenoSWATH_37C_r1	37C_r1	P70168	P70168	IMB1_MOUSE	Kpnb1	10611.9	3972.86	3104.15	10611.9	3972.86	3104.15	3104.15	AALQNLVKI	AALQNLVKI	AALQNLVKI2	2	9.02064e-05	9.02064e-05	0.00320256	0.00294985	0.00285714	0.00214592	0.00299401	0	1	10611.9	3972.86	7755.92	5153.4	0.899482	29.3441	29.2099	29.4514	53.831	29.2969	53.7714	Importin subunit beta-1	0.000320287	0.00096432	0.972546	7051.06	5.58756	0.714988	3.23854	0.999971	0	-10000000	4308.66;5161.82;2716.72;536.659;1148.74;2225.64;1125.27;173.177;253.557;4750.25;280.91;1034.77;
Z:\MS_data\7600_ZenoTof\2022\202210\20221012_MS_DC24_VACV_zenoSWATH_thermostability\20221010_MS_zenoSWATH_DC24_VACV_37C_r2-MS_DC24_VACV_zenoSWATH_37C_r2.mzML	20221010_MS_zenoSWATH_DC24_VACV_37C_r2-MS_DC24_VACV_zenoSWATH_37C_r2	37C_r2	P70168	P70168	IMB1_MOUSE	Kpnb1	5981.38	3132.82	3516.68	5981.38	3132.82	3516.68	3516.68	AALQNLVKI	AALQNLVKI	AALQNLVKI2	2	0.000263547	0.000263547	0.00320256	0.00294985	0.00285714	0.00214592	0.00298507	0	1	5132.74	2688.33	3744.07	3310.81	0.812384	29.316	29.155	29.4234	53.831	29.2441	53.9335	Importin subunit beta-1	0.000320287	0.00096432	0.99192	4538.79	4.1839	0.635405	3.03941	0.999928	0	-10000000	2613.84;2887.48;2011.98;636.845;988.309;1506.68;910.918;33.017;139.445;3480.05;0;334.155;
Z:\MS_data\7600_ZenoTof\2022\202210\20221012_MS_DC24_VACV_zenoSWATH_thermostability\20221010_MS_zenoSWATH_DC24_VACV_37C_r3-MS_DC24_VACV_zenoSWATH_37C_r3.mzML	20221010_MS_zenoSWATH_DC24_VACV_37C_r3-MS_DC24_VACV_zenoSWATH_37C_r3	37C_r3	P70168	P70168	IMB1_MOUSE	Kpnb1	5718.51	2611.73	2788.87	5718.51	2611.73	2788.87	2788.87	AALQNLVKI	AALQNLVKI	AALQNLVKI2	2	7.14776e-05	7.14776e-05	0.00320256	0.00310559	0.003003	0.00214592	0.00314465	0	1	5514.66	2518.63	4215.01	3943.48	0.854423	29.37	29.1821	29.4773	53.831	29.293	53.9423	Importin subunit beta-1	0.000320287	0.00096432	0.967714	5159.4	4.33479	0.51136	2.83711	0.999979	0	-10000000	3608.25;3127;1667.79;210.555;868.56;1049.12;1235.71;197.665;185.217;2779.03;82.3719;186.458;
Z:\MS_data\7600_ZenoTof\2022\202210\20221012_MS_DC24_VACV_zenoSWATH_thermostability\20221010_MS_zenoSWATH_DC24_VACV_41C_r1-MS_DC24_VACV_zenoSWATH_41C_r1.mzML	20221010_MS_zenoSWATH_DC24_VACV_41C_r1-MS_DC24_VACV_zenoSWATH_41C_r1	41C_r1	P70168	P70168	IMB1_MOUSE	Kpnb1	6886.86	2944.95	3186.6	6886.86	2944.95	3186.6	3186.6	AALQNLVKI	AALQNLVKI	AALQNLVKI2	2	0.000205749	0.000205749	0.00320256	0.00303951	0.00294118	0.00214592	0.00307692	0	1	6886.86	2944.95	5361.2	5170.18	0.781292	29.2903	29.183	29.4514	53.831	29.2605	53.66	Importin subunit beta-1	0.000320287	0.00096432	0.909084	6641.48	4.11493	0.471315	3.43626	0.99993	0	-10000000	3562.19;3329.34;2149.33;400.731;1433.36;1758.89;924.724;235.491;397.472;3321.83;597.532;159.15;
Z:\MS_data\7600_ZenoTof\2022\202210\20221012_MS_DC24_VACV_zenoSWATH_thermostability\20221010_MS_zenoSWATH_DC24_VACV_41C_r2-MS_DC24_VACV_zenoSWATH_41C_r2.mzML	20221010_MS_zenoSWATH_DC24_VACV_41C_r2-MS_DC24_VACV_zenoSWATH_41C_r2	41C_r2	P70168	P70168	IMB1_MOUSE	Kpnb1	4894.22	2305.57	1966.21	4894.22	2305.57	1966.21	1966.21	AALQNLVKI	AALQNLVKI	AALQNLVKI2	2	4.31124e-05	4.31124e-05	0.00320256	0.00290698	0.0028169	0.00214592	0.00294985	0	1	4894.22	2305.57	3453.83	3465.39	0.766644	29.3163	29.209	29.4505	53.831	29.2761	53.8677	Importin subunit beta-1	0.000320287	0.00096432	0.946084	4910.61	5.04826	0.578888	3.14865	0.999988	0	-10000000	2918.34;2733.35;1770.03;410.923;238.956;1261.46;1357.78;220.404;61.3136;2964.4;405.141;424.598;
Z:\MS_data\7600_ZenoTof\2022\202210\20221012_MS_DC24_VACV_zenoSWATH_thermostability\20221010_MS_zenoSWATH_DC24_VACV_41C_r3-MS_DC24_VACV_zenoSWATH_41C_r3.mzML	20221010_MS_zenoSWATH_DC24_VACV_41C_r3-MS_DC24_VACV_zenoSWATH_41C_r3	41C_r3	P70168	P70168	IMB1_MOUSE	Kpnb1	6580.39	3240.84	2603	6580.39	3240.84	2603	2603	AALQNLVKI	AALQNLVKI	AALQNLVKI2	2	6.49144e-06	6.49144e-06	0.00320256	0.00284091	0.00275482	0.00214592	0.00288184	0	1	6580.39	3240.84	5031.77	3437.79	0.851649	29.3424	29.2082	29.4766	53.831	29.2943	53.7609	Importin subunit beta-1	0.000320287	0.00096432	0.993918	4495.84	4.76988	0.469798	2.84498	0.999998	0	-10000000	3114.97;2674.74;1984.23;195.034;994.438;1685.53;834.624;0;448.141;2368.34;232.138;440.159;
Z:\MS_data\7600_ZenoTof\2022\202210\20221012_MS_DC24_VACV_zenoSWATH_thermostability\20221010_MS_zenoSWATH_DC24_VACV_45C_r1-MS_DC24_VACV_zenoSWATH_45C_r1.mzML	20221010_MS_zenoSWATH_DC24_VACV_45C_r1-MS_DC24_VACV_zenoSWATH_45C_r1	45C_r1	P70168	P70168	IMB1_MOUSE	Kpnb1	7024.32	2742.03	2902.9	7024.32	2742.03	2902.9	2902.9	AALQNLVKI	AALQNLVKI	AALQNLVKI2	2	0.00010238	0.00010238	0.00320256	0.00296736	0.00287356	0.00214592	0.00301205	0	1	7024.32	2742.03	5420.84	4983.01	0.767152	29.3162	29.182	29.4772	53.831	29.2982	53.7369	Importin subunit beta-1	0.000320287	0.00096432	0.970322	6456.98	4.66269	0.577828	3.19114	0.999966	0	-10000000	3466.09;5035.01;2789.3;1037.72;1162.1;1605.98;943.133;109.985;418.123;4263.31;381.714;1348.67;
Z:\MS_data\7600_ZenoTof\2022\202210\20221012_MS_DC24_VACV_zenoSWATH_thermostability\20221010_MS_zenoSWATH_DC24_VACV_45C_r2-MS_DC24_VACV_zenoSWATH_45C_r2.mzML	20221010_MS_zenoSWATH_DC24_VACV_45C_r2-MS_DC24_VACV_zenoSWATH_45C_r2	45C_r2	P70168	P70168	IMB1_MOUSE	Kpnb1	4457.56	2947.41	2821.72	4457.56	2947.41	2821.72	2821.72	AALQNLVKI	AALQNLVKI	AALQNLVKI2	2	2.99466e-06	2.99466e-06	0.00320256	0.00342466	0.00330033	0.00214592	0.00348432	0	1	2824.5	1867.6	2335.68	3312.69	0.655319	29.2897	29.2092	29.4507	53.831	29.2808	53.7529	Importin subunit beta-1	0.000320287	0.00096432	0.944354	4005.99	4.08603	0.691478	2.37564	0.999999	0	-10000000	2298.34;2890.59;1836.68;271.857;474.2;1164.76;1155.78;115.451;204.164;2294.97;113.477;529.423;
Z:\MS_data\7600_ZenoTof\2022\202210\20221012_MS_DC24_VACV_zenoSWATH_thermostability\20221010_MS_zenoSWATH_DC24_VACV_45C_r3-MS_DC24_VACV_zenoSWATH_45C_r3.mzML	20221010_MS_zenoSWATH_DC24_VACV_45C_r3-MS_DC24_VACV_zenoSWATH_45C_r3	45C_r3	P70168	P70168	IMB1_MOUSE	Kpnb1	6778.77	2778.26	2197.9	6778.77	2778.26	2197.9	2197.9	AALQNLVKI	AALQNLVKI	AALQNLVKI2	2	4.34302e-05	4.34302e-05	0.00320256	0.00304878	0.00294985	0.00214592	0.00308642	0	1	6778.77	2778.26	5196.04	4764.28	0.807107	29.3972	29.2093	29.4508	53.831	29.2985	54.0509	Importin subunit beta-1	0.000320287	0.00096432	0.889332	6215.5	4.50513	0.472717	3.18907	0.999987	0	-10000000	4338.23;4968.23;2082.19;777.311;787.05;1411.38;1492.45;392.488;164.992;4204.05;764.386;932.585;
Z:\MS_data\7600_ZenoTof\2022\202210\20221012_MS_DC24_VACV_zenoSWATH_thermostability\20221010_MS_zenoSWATH_DC24_VACV_49C_r1-MS_DC24_VACV_zenoSWATH_49C_r1.mzML	20221010_MS_zenoSWATH_DC24_VACV_49C_r1-MS_DC24_VACV_zenoSWATH_49C_r1	49C_r1	P70168	P70168	IMB1_MOUSE	Kpnb1	4939.11	3681.12	3899.99	4939.11	3681.12	3899.99	3899.99	AALQNLVKI	AALQNLVKI	AALQNLVKI2	2	0.000897666	0.0212628	0.00320256	0.00505051	0.00478469	0.00214592	0.00512821	0	1	167.814	125.072	131.658	679.738	0.550199	29.3183	29.2647	29.372	53.831	29.257	53.9529	Importin subunit beta-1	0.000320287	0.00096432	0.697047	866.409	2.66957	0.39563	1.32493	0.994173	0	-10000000	574.717;414.793;160.35;43.2713;74.6384;385.794;11.8679;0;0;465;0;223.163;
Z:\MS_data\7600_ZenoTof\2022\202210\20221012_MS_DC24_VACV_zenoSWATH_thermostability\20221010_MS_zenoSWATH_DC24_VACV_49C_r2-MS_DC24_VACV_zenoSWATH_49C_r2.mzML	20221010_MS_zenoSWATH_DC24_VACV_49C_r2-MS_DC24_VACV_zenoSWATH_49C_r2	49C_r2	P70168	P70168	IMB1_MOUSE	Kpnb1	3118.87	1865.06	2348.25	3118.87	1865.06	2348.25	2348.25	AALQNLVKI	AALQNLVKI	AALQNLVKI2	2	0.000142548	0.000142548	0.00320256	0.00395257	0.00378788	0.00214592	0.00401606	0	1	2930.42	1752.37	2515.95	3016.6	0.505086	29.3432	29.2627	29.4774	53.831	29.3357	53.7973	Importin subunit beta-1	0.000320287	0.00096432	0.958426	3513.54	4.01982	0.475923	3.15374	0.999964	0	-10000000	2025.24;2925.81;1115.34;466.577;740.629;980.328;1088.45;64.7224;483.264;2606.71;230.796;699.731;
Z:\MS_data\7600_ZenoTof\2022\202210\20221012_MS_DC24_VACV_zenoSWATH_thermostability\20221010_MS_zenoSWATH_DC24_VACV_49C_r3-MS_DC24_VACV_zenoSWATH_49C_r3.mzML	20221010_MS_zenoSWATH_DC24_VACV_49C_r3-MS_DC24_VACV_zenoSWATH_49C_r3	49C_r3	P70168	P70168	IMB1_MOUSE	Kpnb1	4958.6	3829.25	3387.42	4958.6	3829.25	3387.42	3387.42	AALQNLVKI	AALQNLVKI	AALQNLVKI2	2	0.000940734	0.0136559	0.00320256	0.00446429	0.00425532	0.00214592	0.00454545	0	1	4958.6	3829.25	3928	2727.56	0.809523	29.3709	29.2099	29.5051	53.831	29.3217	54.0974	Importin subunit beta-1	0.000320287	0.00096432	0.967597	3443.2	3.86523	0.609663	2.45634	0.996908	0	-10000000	1856.36;3402.04;734.862;504.514;386.561;603.116;255.522;86.3694;72.8099;1140.96;104.645;133.898;
Z:\MS_data\7600_ZenoTof\2022\202210\20221012_MS_DC24_VACV_zenoSWATH_thermostability\20221010_MS_zenoSWATH_DC24_VACV_53C_r1-MS_DC24_VACV_zenoSWATH_53C_r1.mzML	20221010_MS_zenoSWATH_DC24_VACV_53C_r1-MS_DC24_VACV_zenoSWATH_53C_r1	53C_r1	P70168	P70168	IMB1_MOUSE	Kpnb1	3759.77	2930.86	2337.33	3759.77	2930.86	2337.33	2337.33	AALQNLVKI	AALQNLVKI	AALQNLVKI2	2	0.000110994	0.000110994	0.00320256	0.00581395	0.00546448	0.00214592	0.00595238	0	1	3759.77	2930.86	3901.74	3517.23	0.861726	29.3172	29.183	29.4514	53.831	29.3007	53.9126	Importin subunit beta-1	0.000320287	0.00096432	0.935836	3389.25	3.57403	0.56819	3.01637	0.99997	1.34015	0.352177	2644.72;1361.04;1744.89;285.654;380.807;1508.08;403.266;26.4573;0;1526.32;54.5313;369.393;
Z:\MS_data\7600_ZenoTof\2022\202210\20221012_MS_DC24_VACV_zenoSWATH_thermostability\20221010_MS_zenoSWATH_DC24_VACV_53C_r2-MS_DC24_VACV_zenoSWATH_53C_r2.mzML	20221010_MS_zenoSWATH_DC24_VACV_53C_r2-MS_DC24_VACV_zenoSWATH_53C_r2	53C_r2	P70168	P70168	IMB1_MOUSE	Kpnb1	2807.49	2255.7	2502.56	2807.49	2255.7	2502.56	2502.56	AALQNLVKI	AALQNLVKI	AALQNLVKI2	2	0.00102775	0.00393472	0.00320256	0.0052356	0.00495049	0.00214592	0.00534759	0	1	2130.97	1712.14	1626.63	1929.54	0.632607	29.3699	29.2357	29.5041	53.831	29.2935	54.0589	Importin subunit beta-1	0.000320287	0.00096432	0.962881	2527.81	2.60143	0.304161	1.44493	0.998872	0	-10000000	1129.27;1404.44;966.136;148.628;277.018;326.777;84.7706;0;109.64;2115.08;28.4174;0;
Z:\MS_data\7600_ZenoTof\2022\202210\20221012_MS_DC24_VACV_zenoSWATH_thermostability\20221010_MS_zenoSWATH_DC24_VACV_53C_r3-MS_DC24_VACV_zenoSWATH_53C_r3.mzML	20221010_MS_zenoSWATH_DC24_VACV_53C_r3-MS_DC24_VACV_zenoSWATH_53C_r3	53C_r3	P70168	P70168	IMB1_MOUSE	Kpnb1	1286.7	1914.5	1915.56	1286.7	1914.5	1915.56	1915.56	AALQNLVKI	AALQNLVKI	AALQNLVKI2	2	0.00115407	0.00115407	0.00320256	0.00854701	0.0078125	0.00214592	0.00877193	0	1	1286.7	1914.5	1436.57	1426.06	0.634713	29.3432	29.209	29.3969	53.831	29.2743	54.1092	Importin subunit beta-1	0.000320287	0.00096432	0.767336	1277.28	2.24375	0.416606	2.04278	0.999743	0	-10000000	628.651;1432.33;190.713;85.2876;110.658;25.3208;212.17;94.4597;0;757.942;81.7957;0;
Z:\MS_data\7600_ZenoTof\2022\202210\20221012_MS_DC24_VACV_zenoSWATH_thermostability\20221010_MS_zenoSWATH_DC24_VACV_37C_r1-MS_DC24_VACV_zenoSWATH_37C_r1.mzML	20221010_MS_zenoSWATH_DC24_VACV_37C_r1-MS_DC24_VACV_zenoSWATH_37C_r1	37C_r1	Q9JJ94	Q9JJ94	SSNA1_MOUSE	Ssna1	437.068	163.628	0	437.068	163.628			AALQNYNNEL	AALQNYNNEL	AALQNYNNEL2	2	0.0140845	1	1	0.0605505	0.0613609	1	0.0602706	0	1	437.068	163.628	319.439	0	0.740681	22.5839	22.5302	22.6913	27.9024	22.4876	28.2245	Microtubule nucleation factor SSNA1	0.0438596	0.0331998	0	0	1.10376	0.366678	0	0.679896	1.21044	0.166526	379.877;86.5425;188.92;599.076;0;38.1869;0;59.5259;0;0;107.773;0;
Z:\MS_data\7600_ZenoTof\2022\202210\20221012_MS_DC24_VACV_zenoSWATH_thermostability\20221010_MS_zenoSWATH_DC24_VACV_37C_r3-MS_DC24_VACV_zenoSWATH_37C_r3.mzML	20221010_MS_zenoSWATH_DC24_VACV_37C_r3-MS_DC24_VACV_zenoSWATH_37C_r3	37C_r3	Q9JJ94	Q9JJ94	SSNA1_MOUSE	Ssna1	235.742	107.667	107.667	235.742	107.667	107.667	107.667	AALQNYNNEL	AALQNYNNEL	AALQNYNNEL2	2	0.00106045	0.133288	1	0.0611326	0.0607029	1	0.0608808	0	1	235.742	107.667	180.184	115.289	0.935124	22.5832	22.5027	22.6369	27.9024	22.4976	28.1629	Microtubule nucleation factor SSNA1	0.0438596	0.0331998	0.674408	150.837	1.73679	0.0263126	0.751843	0.962966	0.99487	0.431818	0;146.275;0;369.62;0;89.4667;192.568;0;165.964;0;0;0;
Z:\MS_data\7600_ZenoTof\2022\202210\20221012_MS_DC24_VACV_zenoSWATH_thermostability\20221010_MS_zenoSWATH_DC24_VACV_41C_r2-MS_DC24_VACV_zenoSWATH_41C_r2.mzML	20221010_MS_zenoSWATH_DC24_VACV_41C_r2-MS_DC24_VACV_zenoSWATH_41C_r2	41C_r2	Q9JJ94	Q9JJ94	SSNA1_MOUSE	Ssna1	703.966	331.625	0	703.966	331.625			AALQNYNNEL	AALQNYNNEL	AALQNYNNEL2	2	0.023348	1	1	0.06125	0.0633147	1	0.0610063	0	1	703.966	331.625	496.786	96.1665	0.720966	22.5831	22.4758	22.6637	27.9024	22.4642	28.2734	Microtubule nucleation factor SSNA1	0.0438596	0.0331998	0	136.272	1.69245	0.487254	0.0963364	0.680518	1.63366	0.37422	367.032;561.901;415.222;368.084;0;0;63.7725;0;124.8;0;53.8861;0;
Z:\MS_data\7600_ZenoTof\2022\202210\20221012_MS_DC24_VACV_zenoSWATH_thermostability\20221010_MS_zenoSWATH_DC24_VACV_41C_r3-MS_DC24_VACV_zenoSWATH_41C_r3.mzML	20221010_MS_zenoSWATH_DC24_VACV_41C_r3-MS_DC24_VACV_zenoSWATH_41C_r3	41C_r3	Q9JJ94	Q9JJ94	SSNA1_MOUSE	Ssna1	212.772	104.79	0	212.772	104.79			AALQNYNNEL	AALQNYNNEL	AALQNYNNEL2	2	0.0167043	1	1	0.0640615	0.0642494	1	0.0644745	0	1	212.772	104.79	162.698	0	0.795196	22.6096	22.5291	22.6633	27.9024	22.4748	28.3692	Microtubule nucleation factor SSNA1	0.0438596	0.0331998	0	0	0.944123	0.167221	0	0.754222	1.05382	0.488937	178.602;220.745;390.305;394.775;88.809;0;0;0;0;0;0;74.8693;
Z:\MS_data\7600_ZenoTof\2022\202210\20221012_MS_DC24_VACV_zenoSWATH_thermostability\20221010_MS_zenoSWATH_DC24_VACV_45C_r1-MS_DC24_VACV_zenoSWATH_45C_r1.mzML	20221010_MS_zenoSWATH_DC24_VACV_45C_r1-MS_DC24_VACV_zenoSWATH_45C_r1	45C_r1	Q9JJ94	Q9JJ94	SSNA1_MOUSE	Ssna1	333.65	130.244	130.244	333.65	130.244	130.244	130.244	AALQNYNNEL	AALQNYNNEL	AALQNYNNEL2	2	0.00909962	0.649617	1	0.0618892	0.0627426	1	0.061599	0	1	333.65	130.244	257.486	370.606	0.801784	22.3953	22.3417	22.4491	27.9024	22.4725	27.6042	Microtubule nucleation factor SSNA1	0.0438596	0.0331998	0.668794	480.231	1.35371	0.525887	0	0.821884	1.95461	0.289346	111.848;165.09;125.946;81.797;0;0;0;0;49.6171;192.81;99.8033;603.763;
Z:\MS_data\7600_ZenoTof\2022\202210\20221012_MS_DC24_VACV_zenoSWATH_thermostability\20221010_MS_zenoSWATH_DC24_VACV_49C_r3-MS_DC24_VACV_zenoSWATH_49C_r3.mzML	20221010_MS_zenoSWATH_DC24_VACV_49C_r3-MS_DC24_VACV_zenoSWATH_49C_r3	49C_r3	Q9JJ94	Q9JJ94	SSNA1_MOUSE	Ssna1	0	0	0					AALQNYNNEL	AALQNYNNEL	AALQNYNNEL2	2	0.0206117	1	1	0.064574	0.0657194	1	0.063234	0	1	0	0	0	102.922	0	22.2619	22.1814	22.3425	27.9024	22.4887	27.1207	Microtubule nucleation factor SSNA1	0.0438596	0.0331998	0.584888	129.926	1.1755	1.40109e-12	0.987499	0.781068	1.22406	0.632513	0;108.179;0;192.202;149.574;81.8281;0;0;199.55;0;151.983;0;
Z:\MS_data\7600_ZenoTof\2022\202210\20221012_MS_DC24_VACV_zenoSWATH_thermostability\20221010_MS_zenoSWATH_DC24_VACV_37C_r1-MS_DC24_VACV_zenoSWATH_37C_r1.mzML	20221010_MS_zenoSWATH_DC24_VACV_37C_r1-MS_DC24_VACV_zenoSWATH_37C_r1	37C_r1	Q80VP1	Q80VP1	EPN1_MOUSE	Epn1	460.665	172.463	172.463	460.665	172.463	172.463	172.463	AALVDLDSL	AALVDLDSL	AALVDLDSL2	2	0.000106309	0.000106309	0.00320256	0.00535332	0.00529101	0.0112867	0.00539374	0	1	460.665	172.463	336.686	437.789	0.324642	35.7582	35.6508	35.8119	79.5593	35.6941	79.7297	Epsin-1	0.000750188	0.00096432	0.740658	598.999	2.80838	0.249787	2.03885	0.999965	0	-10000000	756.151;236.319;129.578;521.439;350.607;201.616;542.323;51.6415;0;0;709.925;0;
Z:\MS_data\7600_ZenoTof\2022\202210\20221012_MS_DC24_VACV_zenoSWATH_thermostability\20221010_MS_zenoSWATH_DC24_VACV_37C_r2-MS_DC24_VACV_zenoSWATH_37C_r2.mzML	20221010_MS_zenoSWATH_DC24_VACV_37C_r2-MS_DC24_VACV_zenoSWATH_37C_r2	37C_r2	Q80VP1	Q80VP1	EPN1_MOUSE	Epn1	523.435	274.155	274.155	523.435	274.155	274.155	274.155	AALVDLDSL	AALVDLDSL	AALVDLDSL2	2	0.00048566	0.00048566	0.00320256	0.00538793	0.00532481	0.0112867	0.00542299	0	1	523.435	274.155	381.818	376.026	0.711848	35.7033	35.6496	35.8375	79.5593	35.6879	79.5003	Epsin-1	0.000750188	0.00096432	0.393459	515.494	2.22931	0.11956	1.52832	0.999867	0	-10000000	382.542;467.469;189.693;472.471;122.122;281.75;605.487;0;0;0;67.1193;0;
Z:\MS_data\7600_ZenoTof\2022\202210\20221012_MS_DC24_VACV_zenoSWATH_thermostability\20221010_MS_zenoSWATH_DC24_VACV_37C_r3-MS_DC24_VACV_zenoSWATH_37C_r3.mzML	20221010_MS_zenoSWATH_DC24_VACV_37C_r3-MS_DC24_VACV_zenoSWATH_37C_r3	37C_r3	Q80VP1	Q80VP1	EPN1_MOUSE	Epn1	433.763	198.106	198.106	433.763	198.106	198.106	198.106	AALVDLDSL	AALVDLDSL	AALVDLDSL2	2	0.000596659	0.0423261	0.00320256	0.00554939	0.00548246	0.0112867	0.00447427	0	1	433.763	198.106	331.537	548.594	0.435182	35.8372	35.6762	35.8909	79.5593	35.7152	79.9349	Epsin-1	0.000750188	0.00096432	0.673546	717.747	1.84119	0.152037	1.19502	0.987935	0	-10000000	407.939;220.441;171.212;17.2709;18.2646;394.407;223.659;123.938;0;0;234.709;0;
Z:\MS_data\7600_ZenoTof\2022\202210\20221012_MS_DC24_VACV_zenoSWATH_thermostability\20221010_MS_zenoSWATH_DC24_VACV_41C_r1-MS_DC24_VACV_zenoSWATH_41C_r1.mzML	20221010_MS_zenoSWATH_DC24_VACV_41C_r1-MS_DC24_VACV_zenoSWATH_41C_r1	41C_r1	Q80VP1	Q80VP1	EPN1_MOUSE	Epn1	355.88	152.181	152.181	355.88	152.181	152.181	152.181	AALVDLDSL	AALVDLDSL	AALVDLDSL2	2	0.00036355	0.00036355	0.00320256	0.00638978	0.00631579	0.0112867	0.00643777	0	1	355.88	152.181	277.041	425.631	0.616207	35.7045	35.6508	35.785	79.5593	35.7342	79.4682	Epsin-1	0.000750188	0.00096432	0.374432	546.754	2.34049	0.374748	1.73817	0.999877	0	-10000000	429.735;294.291;91.7666;308.749;100.275;77.3481;191.561;149.129;0;0;484.749;0;
Z:\MS_data\7600_ZenoTof\2022\202210\20221012_MS_DC24_VACV_zenoSWATH_thermostability\20221010_MS_zenoSWATH_DC24_VACV_41C_r2-MS_DC24_VACV_zenoSWATH_41C_r2.mzML	20221010_MS_zenoSWATH_DC24_VACV_41C_r2-MS_DC24_VACV_zenoSWATH_41C_r2	41C_r2	Q80VP1	Q80VP1	EPN1_MOUSE	Epn1	394.07	185.639	185.639	394.07	185.639	185.639	185.639	AALVDLDSL	AALVDLDSL	AALVDLDSL2	2	0.00066313	0.0149674	0.00320256	0.00618557	0.00612245	0.0112867	0.00623053	0	1	394.07	185.639	278.094	308.705	0.777095	35.7302	35.6228	35.8376	79.5593	35.7062	79.4862	Epsin-1	0.000750188	0.00096432	0.566637	437.448	2.25373	0.431015	1.38583	0.995817	0	-10000000	397.751;821.767;344.124;69.0838;251.585;132.862;43.4894;0;0;0;121.602;0;
Z:\MS_data\7600_ZenoTof\2022\202210\20221012_MS_DC24_VACV_zenoSWATH_thermostability\20221010_MS_zenoSWATH_DC24_VACV_41C_r3-MS_DC24_VACV_zenoSWATH_41C_r3.mzML	20221010_MS_zenoSWATH_DC24_VACV_41C_r3-MS_DC24_VACV_zenoSWATH_41C_r3	41C_r3	Q80VP1	Q80VP1	EPN1_MOUSE	Epn1	218.027	107.378	107.378	218.027	107.378	107.378	107.378	AALVDLDSL	AALVDLDSL	AALVDLDSL2	2	0.000596303	0.0143569	0.00320256	0.00448431	0.00442968	0.0112867	0.00451977	0	1	218.027	107.378	166.717	372.36	0.876727	35.7559	35.6754	35.8633	79.5593	35.6926	79.6122	Epsin-1	0.000750188	0.00096432	0.792407	486.96	2.61479	0.127369	1.35009	0.996192	0	-10000000	158.034;0;35.2621;97.4748;148.265;406.713;170.591;0;0;0;218.343;0;
Z:\MS_data\7600_ZenoTof\2022\202210\20221012_MS_DC24_VACV_zenoSWATH_thermostability\20221010_MS_zenoSWATH_DC24_VACV_45C_r1-MS_DC24_VACV_zenoSWATH_45C_r1.mzML	20221010_MS_zenoSWATH_DC24_VACV_45C_r1-MS_DC24_VACV_zenoSWATH_45C_r1	45C_r1	Q80VP1	Q80VP1	EPN1_MOUSE	Epn1	788.422	307.77	307.77	788.422	307.77	307.77	307.77	AALVDLDSL	AALVDLDSL	AALVDLDSL2	2	0.00062461	0.00339889	0.00320256	0.00445434	0.00440044	0.0112867	0.00448934	0	1	788.422	307.77	608.445	451.414	0.801475	35.7836	35.6494	35.9178	79.5593	35.7114	79.7413	Epsin-1	0.000750188	0.00096432	0.632042	584.941	2.16406	0.131212	1.50987	0.998867	0	-10000000	623.515;510.855;60.1157;507.954;387.674;257.36;114.936;0;0;76.9358;179.606;0;
Z:\MS_data\7600_ZenoTof\2022\202210\20221012_MS_DC24_VACV_zenoSWATH_thermostability\20221010_MS_zenoSWATH_DC24_VACV_45C_r2-MS_DC24_VACV_zenoSWATH_45C_r2.mzML	20221010_MS_zenoSWATH_DC24_VACV_45C_r2-MS_DC24_VACV_zenoSWATH_45C_r2	45C_r2	Q80VP1	Q80VP1	EPN1_MOUSE	Epn1	97.9914	64.7935	64.7935	97.9914	64.7935	64.7935	64.7935	AALVDLDSL	AALVDLDSL	AALVDLDSL2	2	0.000761615	0.0373886	0.00320256	0.00764331	0.00754717	0.0112867	0.00771208	0	1	97.9914	64.7935	81.0326	323.051	0.590595	35.7574	35.6769	35.8648	79.5593	35.7196	79.5548	Epsin-1	0.000750188	0.00096432	0.486579	390.66	1.55667	0.665314	0	0.991881	0	-10000000	186.882;83.0807;146.996;125.155;0;0;111.57;0;0;0;133.41;0;
Z:\MS_data\7600_ZenoTof\2022\202210\20221012_MS_DC24_VACV_zenoSWATH_thermostability\20221010_MS_zenoSWATH_DC24_VACV_45C_r3-MS_DC24_VACV_zenoSWATH_45C_r3.mzML	20221010_MS_zenoSWATH_DC24_VACV_45C_r3-MS_DC24_VACV_zenoSWATH_45C_r3	45C_r3	Q80VP1	Q80VP1	EPN1_MOUSE	Epn1	361.881	148.316	148.316	361.881	148.316	148.316	148.316	AALVDLDSL	AALVDLDSL	AALVDLDSL2	2	0.000587889	0.00127399	0.00320256	0.00461894	0.004561	0.0112867	0.00465116	0	1	361.881	148.316	277.388	343.19	0.814273	35.7309	35.6772	35.8114	79.5593	35.6878	79.5899	Epsin-1	0.000750188	0.00096432	0.437689	447.726	2.78451	0.065704	2.0189	0.999605	1.35341	0.581619	246.772;205.117;246.836;217.425;94.5451;182.569;148.33;0;0;0;131.753;0;
Z:\MS_data\7600_ZenoTof\2022\202210\20221012_MS_DC24_VACV_zenoSWATH_thermostability\20221010_MS_zenoSWATH_DC24_VACV_49C_r1-MS_DC24_VACV_zenoSWATH_49C_r1.mzML	20221010_MS_zenoSWATH_DC24_VACV_49C_r1-MS_DC24_VACV_zenoSWATH_49C_r1	49C_r1	Q80VP1	Q80VP1	EPN1_MOUSE	Epn1	52.1123	38.8394	38.8393	52.1123	38.8394	38.8393	38.8393	AALVDLDSL	AALVDLDSL	AALVDLDSL2	2	0.000897666	0.0903487	0.00320256	0.00934579	0.00920245	0.0112867	0.00941915	0	1	52.1123	38.8394	40.8845	122.465	0.352224	35.7058	35.6521	35.8132	79.5593	35.7144	79.278	Epsin-1	0.000750188	0.00096432	0.35951	156.096	1.61551	0.0361535	1.40267	0.975702	1.74055	0.392753	150.822;28.2476;56.717;69.0843;50.1378;237.384;0;0;0;0;265.783;0;
Z:\MS_data\7600_ZenoTof\2022\202210\20221012_MS_DC24_VACV_zenoSWATH_thermostability\20221010_MS_zenoSWATH_DC24_VACV_49C_r2-MS_DC24_VACV_zenoSWATH_49C_r2.mzML	20221010_MS_zenoSWATH_DC24_VACV_49C_r2-MS_DC24_VACV_zenoSWATH_49C_r2	49C_r2	Q80VP1	Q80VP1	EPN1_MOUSE	Epn1	327.115	195.613	195.613	327.115	195.613	195.613	195.613	AALVDLDSL	AALVDLDSL	AALVDLDSL2	2	0.00222222	0.104309	0.00320256	0.00815217	0.00803213	0.0112867	0.00823045	0	1	327.115	195.613	280.85	137.801	0.647974	35.784	35.6498	35.8645	79.5593	35.7562	79.4604	Epsin-1	0.000750188	0.00096432	0.302675	160.501	1.04002	0.0839747	0.407768	0.97429	0	-10000000	300.233;284.322;122.353;0;69.6557;0;76.624;74.5647;0;0;436.067;0;
Z:\MS_data\7600_ZenoTof\2022\202210\20221012_MS_DC24_VACV_zenoSWATH_thermostability\20221010_MS_zenoSWATH_DC24_VACV_49C_r3-MS_DC24_VACV_zenoSWATH_49C_r3.mzML	20221010_MS_zenoSWATH_DC24_VACV_49C_r3-MS_DC24_VACV_zenoSWATH_49C_r3	49C_r3	Q80VP1	Q80VP1	EPN1_MOUSE	Epn1	614.214	474.322	474.322	614.214	474.322	474.322	474.322	AALVDLDSL	AALVDLDSL	AALVDLDSL2	2	0.00520446	0.450083	0.00320256	0.00896287	0.00883838	0.0112867	0.00904393	0	1	614.214	474.322	486.555	332.403	0.615542	34.8992	34.8186	35.0334	79.5593	35.7281	75.6855	Epsin-1	0.000750188	0.00096432	0.673257	419.616	1.78441	0.421481	0.816988	0.907269	0	-10000000	636.84;293.737;0;0;37.7824;169.563;38.8303;0;0;0;149.153;0;
Z:\MS_data\7600_ZenoTof\2022\202210\20221012_MS_DC24_VACV_zenoSWATH_thermostability\20221010_MS_zenoSWATH_DC24_VACV_53C_r1-MS_DC24_VACV_zenoSWATH_53C_r1.mzML	20221010_MS_zenoSWATH_DC24_VACV_53C_r1-MS_DC24_VACV_zenoSWATH_53C_r1	53C_r1	Q80VP1	Q80VP1	EPN1_MOUSE	Epn1	102.658	80.0256	80.0256	102.658	80.0256	80.0256	80.0256	AALVDLDSL	AALVDLDSL	AALVDLDSL2	2	0.000898473	0.285446	0.00320256	0.00739372	0.00724638	0.0112867	0.00747664	0	1	102.658	80.0256	106.535	129.113	0.801784	35.7581	35.7044	35.8118	79.5593	35.7666	79.396	Epsin-1	0.000750188	0.00096432	0	124.415	1.06562	0.0474866	0	0.927886	0	-10000000	86.5426;221.548;0;0;21.4877;0;0;0;0;0;0;0;
Z:\MS_data\7600_ZenoTof\2022\202210\20221012_MS_DC24_VACV_zenoSWATH_thermostability\20221010_MS_zenoSWATH_DC24_VACV_53C_r3-MS_DC24_VACV_zenoSWATH_53C_r3.mzML	20221010_MS_zenoSWATH_DC24_VACV_53C_r3-MS_DC24_VACV_zenoSWATH_53C_r3	53C_r3	Q80VP1	Q80VP1	EPN1_MOUSE	Epn1	104.255	155.122	155.122	104.255	155.122	155.122	155.122	AALVDLDSL	AALVDLDSL	AALVDLDSL2	2	0.00117509	0.191094	0.00320256	0.0111524	0.0109489	0.0112867	0.011257	0	1	104.255	155.122	116.398	23.6588	0.801784	35.7032	35.6495	35.7569	79.5593	35.7453	79.4305	Epsin-1	0.000750188	0.00096432	0	21.1906	1.06741	0.329369	0	0.959215	0	-10000000	70.0801;51.6948;0;0;0;0;0;0;0;0;178.985;0;
Z:\MS_data\7600_ZenoTof\2022\202210\20221012_MS_DC24_VACV_zenoSWATH_thermostability\20221010_MS_zenoSWATH_DC24_VACV_37C_r1-MS_DC24_VACV_zenoSWATH_37C_r1.mzML	20221010_MS_zenoSWATH_DC24_VACV_37C_r1-MS_DC24_VACV_zenoSWATH_37C_r1	37C_r1	Q8CHU3	Q8CHU3	EPN2_MOUSE	Epn2	11997.3	4491.53	3264.42	11997.3	4491.53	3264.42	3264.42	AALVNLDSL	AALVNLDSL	AALVNLDSL2	2	0.00017749	0.00017749	0.00320256	0.00294985	0.00285714	0.00214592	0.00299401	0	1	960.386	359.547	701.916	983.156	0.706388	34.8188	34.7651	34.953	74.8865	34.7722	75.0647	Epsin-2	0.000750188	0.00096432	0.624448	1345.19	3.28561	0.619454	2.95189	0.999942	0.908577	0.147702	402.141;605.936;639.997;382.478;393.763;542.356;631.185;0;357.973;162.181;0;0;
Z:\MS_data\7600_ZenoTof\2022\202210\20221012_MS_DC24_VACV_zenoSWATH_thermostability\20221010_MS_zenoSWATH_DC24_VACV_37C_r2-MS_DC24_VACV_zenoSWATH_37C_r2.mzML	20221010_MS_zenoSWATH_DC24_VACV_37C_r2-MS_DC24_VACV_zenoSWATH_37C_r2	37C_r2	Q8CHU3	Q8CHU3	EPN2_MOUSE	Epn2	6100.89	3195.41	2634.69	6100.89	3195.41	2634.69	2634.69	AALVNLDSL	AALVNLDSL	AALVNLDSL2	2	0.000383394	0.000383394	0.00320256	0.00294985	0.00285714	0.00214592	0.00298507	0	1	644.302	337.461	469.985	666.451	0.411235	34.8444	34.7639	34.9249	74.8865	34.7339	75.3098	Epsin-2	0.000750188	0.00096432	0.880232	913.638	2.8337	0.370235	2.89997	0.999895	0.628842	0.0758715	1039.14;131.637;773.045;103.538;107.617;268.043;337.321;20.1377;0;0;0;0;
Z:\MS_data\7600_ZenoTof\2022\202210\20221012_MS_DC24_VACV_zenoSWATH_thermostability\20221010_MS_zenoSWATH_DC24_VACV_37C_r3-MS_DC24_VACV_zenoSWATH_37C_r3.mzML	20221010_MS_zenoSWATH_DC24_VACV_37C_r3-MS_DC24_VACV_zenoSWATH_37C_r3	37C_r3	Q8CHU3	Q8CHU3	EPN2_MOUSE	Epn2	11583.5	5290.37	3144.53	11583.5	5290.37	3144.53	3144.53	AALVNLDSL	AALVNLDSL	AALVNLDSL2	2	0.000596659	0.00922093	0.00320256	0.00310559	0.003003	0.00214592	0.00314465	0	1	593.339	270.987	453.506	957.327	0.736144	34.9247	34.7637	35.0052	74.8865	34.7488	75.5414	Epsin-2	0.000750188	0.00096432	0.925251	1252.51	2.33677	0.569829	0.556221	0.997347	0	-10000000	464.695;326.045;384.506;126.94;125.344;0;45.2693;0;305.353;0;0;0;
Z:\MS_data\7600_ZenoTof\2022\202210\20221012_MS_DC24_VACV_zenoSWATH_thermostability\20221010_MS_zenoSWATH_DC24_VACV_41C_r1-MS_DC24_VACV_zenoSWATH_41C_r1.mzML	20221010_MS_zenoSWATH_DC24_VACV_41C_r1-MS_DC24_VACV_zenoSWATH_41C_r1	41C_r1	Q8CHU3	Q8CHU3	EPN2_MOUSE	Epn2	2629.35	1124.36	864.694	2629.35	1124.36	864.694	864.694	AALVNLDSL	AALVNLDSL	AALVNLDSL2	2	0.000600601	0.00349231	0.00320256	0.00303951	0.00294118	0.00214592	0.00307692	0	1	236.299	101.046	183.951	912.192	0.0979481	34.9261	34.7919	35.0066	74.8865	34.7456	75.5876	Epsin-2	0.000750188	0.00096432	0.79299	1171.78	2.02464	0.154585	1.92629	0.998817	0	-10000000	812.593;550.734;33.3154;181.783;169.573;26.6885;100.369;0;118.289;10.9828;0;0;
Z:\MS_data\7600_ZenoTof\2022\202210\20221012_MS_DC24_VACV_zenoSWATH_thermostability\20221010_MS_zenoSWATH_DC24_VACV_41C_r2-MS_DC24_VACV_zenoSWATH_41C_r2.mzML	20221010_MS_zenoSWATH_DC24_VACV_41C_r2-MS_DC24_VACV_zenoSWATH_41C_r2	41C_r2	Q8CHU3	Q8CHU3	EPN2_MOUSE	Epn2	7266.12	3422.93	3459.24	7266.12	3422.93	3459.24	3459.24	AALVNLDSL	AALVNLDSL	AALVNLDSL2	2	0.00066313	0.00311399	0.00320256	0.00290698	0.0028169	0.00214592	0.00294985	0	1	1206.23	568.231	851.23	734.427	0.765309	34.8176	34.764	35.0055	74.8865	34.7652	75.1858	Epsin-2	0.000750188	0.00096432	0.80433	1040.71	2.39295	0.379269	1.82752	0.999127	0	-10000000	829.841;385.309;50.9283;419.59;251.585;497.098;426.054;0;39.7747;0;0;0;
Z:\MS_data\7600_ZenoTof\2022\202210\20221012_MS_DC24_VACV_zenoSWATH_thermostability\20221010_MS_zenoSWATH_DC24_VACV_41C_r3-MS_DC24_VACV_zenoSWATH_41C_r3.mzML	20221010_MS_zenoSWATH_DC24_VACV_41C_r3-MS_DC24_VACV_zenoSWATH_41C_r3	41C_r3	Q8CHU3	Q8CHU3	EPN2_MOUSE	Epn2	4329.65	2132.35	1647.42	4329.65	2132.35	1647.42	1647.42	AALVNLDSL	AALVNLDSL	AALVNLDSL2	2	4.25305e-05	4.25305e-05	0.00320256	0.00284091	0.00275482	0.00214592	0.00288184	0	1	395.127	194.6	302.138	617.808	0.382922	34.8702	34.7896	34.9775	74.8865	34.75	75.2271	Epsin-2	0.000750188	0.00096432	0.854487	807.95	2.24517	0.24624	2.85906	0.999989	0	-10000000	708.96;442.914;161.696;170.909;50.8539;148.062;144.345;136.937;0;0;62.1872;0;
Z:\MS_data\7600_ZenoTof\2022\202210\20221012_MS_DC24_VACV_zenoSWATH_thermostability\20221010_MS_zenoSWATH_DC24_VACV_45C_r1-MS_DC24_VACV_zenoSWATH_45C_r1.mzML	20221010_MS_zenoSWATH_DC24_VACV_45C_r1-MS_DC24_VACV_zenoSWATH_45C_r1	45C_r1	Q8CHU3	Q8CHU3	EPN2_MOUSE	Epn2	14392.2	5618.18	3912.03	14392.2	5618.18	3912.03	3912.03	AALVNLDSL	AALVNLDSL	AALVNLDSL2	2	0.00062461	0.0016856	0.00320256	0.00296736	0.00287356	0.00214592	0.00301205	0	1	1048.73	409.383	809.327	969.99	0.892759	34.8711	34.7637	35.0052	74.8865	34.7464	75.2367	Epsin-2	0.000750188	0.00096432	0.774297	1256.91	3.04309	0.337714	2.77849	0.999438	0	-10000000	832.974;527.47;372.412;803.251;190.346;323.974;647.227;286.711;24.0308;0;0;0;
Z:\MS_data\7600_ZenoTof\2022\202210\20221012_MS_DC24_VACV_zenoSWATH_thermostability\20221010_MS_zenoSWATH_DC24_VACV_45C_r2-MS_DC24_VACV_zenoSWATH_45C_r2.mzML	20221010_MS_zenoSWATH_DC24_VACV_45C_r2-MS_DC24_VACV_zenoSWATH_45C_r2	45C_r2	Q8CHU3	Q8CHU3	EPN2_MOUSE	Epn2	4137.75	2735.95	3090.65	4137.75	2735.95	3090.65	3090.65	AALVNLDSL	AALVNLDSL	AALVNLDSL2	2	0.000761615	0.00574525	0.00320256	0.00342466	0.00330033	0.00214592	0.00348432	0	1	878.064	580.59	726.103	548.129	0.917519	34.8715	34.791	34.952	74.8865	34.7732	75.3048	Epsin-2	0.000750188	0.00096432	0.736488	662.844	2.74318	0.138252	1.94875	0.998744	0	-10000000	615.678;212.871;138.779;0;50.1376;341.148;158.831;0;59.6616;102.506;0;0;
Z:\MS_data\7600_ZenoTof\2022\202210\20221012_MS_DC24_VACV_zenoSWATH_thermostability\20221010_MS_zenoSWATH_DC24_VACV_45C_r3-MS_DC24_VACV_zenoSWATH_45C_r3.mzML	20221010_MS_zenoSWATH_DC24_VACV_45C_r3-MS_DC24_VACV_zenoSWATH_45C_r3	45C_r3	Q8CHU3	Q8CHU3	EPN2_MOUSE	Epn2	16486.5	6756.96	6679.21	16486.5	6756.96	6679.21	6679.21	AALVNLDSL	AALVNLDSL	AALVNLDSL2	2	0.000587889	0.00288161	0.00320256	0.00304878	0.00294985	0.00214592	0.00308642	0	1	251.329	103.006	192.648	824.245	-0.57779	34.8718	34.8182	34.9524	74.8865	34.7559	75.212	Epsin-2	0.000750188	0.00096432	0.726032	1075.31	3.27964	0.500397	2.30686	0.999107	0	-10000000	1276.65;539.472;101.431;470.887;104.036;793.92;306.277;0;0;0;0;0;
Z:\MS_data\7600_ZenoTof\2022\202210\20221012_MS_DC24_VACV_zenoSWATH_thermostability\20221010_MS_zenoSWATH_DC24_VACV_49C_r1-MS_DC24_VACV_zenoSWATH_49C_r1.mzML	20221010_MS_zenoSWATH_DC24_VACV_49C_r1-MS_DC24_VACV_zenoSWATH_49C_r1	49C_r1	Q8CHU3	Q8CHU3	EPN2_MOUSE	Epn2	3421.89	2550.34	3472.93	3421.89	2550.34	3472.93	3472.93	AALVNLDSL	AALVNLDSL	AALVNLDSL2	2	0.000897666	0.00911317	0.00320256	0.00505051	0.00478469	0.00214592	0.00512821	0	1	1096.67	817.348	860.386	739.494	0.803123	34.8737	34.7395	35.0079	74.8865	34.778	75.4169	Epsin-2	0.000750188	0.00096432	0.779935	942.575	2.63063	0.0732622	2.08189	0.997494	0	-10000000	420.954;706.555;21.4322;684.114;210.577;200.512;269.807;0;152.884;102.507;165.83;0;
Z:\MS_data\7600_ZenoTof\2022\202210\20221012_MS_DC24_VACV_zenoSWATH_thermostability\20221010_MS_zenoSWATH_DC24_VACV_49C_r2-MS_DC24_VACV_zenoSWATH_49C_r2.mzML	20221010_MS_zenoSWATH_DC24_VACV_49C_r2-MS_DC24_VACV_zenoSWATH_49C_r2	49C_r2	Q8CHU3	Q8CHU3	EPN2_MOUSE	Epn2	3015.59	1803.3	2756.89	3015.59	1803.3	2756.89	2756.89	AALVNLDSL	AALVNLDSL	AALVNLDSL2	2	0.000857633	0.0324349	0.00320256	0.00395257	0.00378788	0.00214592	0.00401606	0	1	1249.25	747.042	1072.56	960.671	0.696163	34.8982	34.8177	35.0861	74.8865	34.7614	75.4468	Epsin-2	0.000750188	0.00096432	0.872004	1118.93	2.60834	0.08172	2.34106	0.991861	0	-10000000	1039.29;390.11;0;145.853;506.574;445.345;150.035;154.054;230.362;0;62.1861;0;
Z:\MS_data\7600_ZenoTof\2022\202210\20221012_MS_DC24_VACV_zenoSWATH_thermostability\20221010_MS_zenoSWATH_DC24_VACV_49C_r3-MS_DC24_VACV_zenoSWATH_49C_r3.mzML	20221010_MS_zenoSWATH_DC24_VACV_49C_r3-MS_DC24_VACV_zenoSWATH_49C_r3	49C_r3	Q8CHU3	Q8CHU3	EPN2_MOUSE	Epn2	4460.91	3444.91	2010.24	4460.91	3444.91	2010.24	2010.24	AALVNLDSL	AALVNLDSL	AALVNLDSL2	2	0.000940734	0.0145236	0.00320256	0.00446429	0.00425532	0.00214592	0.00454545	0	1	215.583	166.482	170.776	518.1	0.161506	34.8723	34.8186	34.9797	74.8865	34.8034	75.546	Epsin-2	0.000750188	0.00096432	0.884383	654.036	2.28176	0.402121	2.08529	0.996713	0	-10000000	561.742;293.737;122.228;225.986;0;204.223;237.212;0;149.153;0;0;0;
Z:\MS_data\7600_ZenoTof\2022\202210\20221012_MS_DC24_VACV_zenoSWATH_thermostability\20221010_MS_zenoSWATH_DC24_VACV_53C_r1-MS_DC24_VACV_zenoSWATH_53C_r1.mzML	20221010_MS_zenoSWATH_DC24_VACV_53C_r1-MS_DC24_VACV_zenoSWATH_53C_r1	53C_r1	Q8CHU3	Q8CHU3	EPN2_MOUSE	Epn2	2030.39	1582.75	2294.94	2030.39	1582.75	2294.94	2294.94	AALVNLDSL	AALVNLDSL	AALVNLDSL2	2	0.000898473	0.0264226	0.00320256	0.00581395	0.00546448	0.00214592	0.00595238	0	1	748.431	583.427	776.692	1146.6	0.8164	34.9261	34.7918	35.0603	74.8865	34.7676	75.5925	Epsin-2	0.000750188	0.00096432	0.935229	1104.88	2.35371	0.0522341	2.15812	0.992857	0	-10000000	650.167;595.596;150.025;358.129;39.2151;74.9597;330.597;86.5923;0;0;0;0;
Z:\MS_data\7600_ZenoTof\2022\202210\20221012_MS_DC24_VACV_zenoSWATH_thermostability\20221010_MS_zenoSWATH_DC24_VACV_53C_r2-MS_DC24_VACV_zenoSWATH_53C_r2.mzML	20221010_MS_zenoSWATH_DC24_VACV_53C_r2-MS_DC24_VACV_zenoSWATH_53C_r2	53C_r2	Q8CHU3	Q8CHU3	EPN2_MOUSE	Epn2	2549.67	2048.55	3296	2549.67	2048.55	3296	3296	AALVNLDSL	AALVNLDSL	AALVNLDSL2	2	0.00102775	0.0065733	0.00320256	0.0052356	0.00495049	0.00214592	0.00534759	0	1	1183.36	950.781	903.294	751.027	0.714235	34.9249	34.8176	35.0323	74.8865	34.8604	75.3503	Epsin-2	0.000750188	0.00096432	0.710877	983.886	2.94502	0.145517	2.75391	0.998117	0	-10000000	693.125;695.844;276.073;648.889;21.1293;313.763;373.28;0;50.1323;0;0;0;
Z:\MS_data\7600_ZenoTof\2022\202210\20221012_MS_DC24_VACV_zenoSWATH_thermostability\20221010_MS_zenoSWATH_DC24_VACV_53C_r3-MS_DC24_VACV_zenoSWATH_53C_r3.mzML	20221010_MS_zenoSWATH_DC24_VACV_53C_r3-MS_DC24_VACV_zenoSWATH_53C_r3	53C_r3	Q8CHU3	Q8CHU3	EPN2_MOUSE	Epn2	522.439	777.345	1593.77	522.439	777.345	1593.77	1593.77	AALVNLDSL	AALVNLDSL	AALVNLDSL2	2	0.00117509	0.0128277	0.00320256	0.00854701	0.0078125	0.00214592	0.00877193	0	1	411.507	612.287	459.438	612.689	0.633065	34.9248	34.8712	35.0322	74.8865	34.8011	75.5879	Epsin-2	0.000750188	0.00096432	0.766459	548.77	1.78081	0.692317	0.754666	0.997154	0	-10000000	320.928;439.401;61.1137;0;19.8761;82.1545;110.976;0;20.3015;0;103.644;0;
Z:\MS_data\7600_ZenoTof\2022\202210\20221012_MS_DC24_VACV_zenoSWATH_thermostability\20221010_MS_zenoSWATH_DC24_VACV_57C_r2-MS_DC24_VACV_zenoSWATH_57C_r2.mzML	20221010_MS_zenoSWATH_DC24_VACV_57C_r2-MS_DC24_VACV_zenoSWATH_57C_r2	57C_r2	Q8CHU3	Q8CHU3	EPN2_MOUSE	Epn2	76.9777	176.879	0	76.9777	176.879			AALVNLDSL	AALVNLDSL	AALVNLDSL2	2	0.0178174	0.250374	0.00320256	0.0185185	0.0153846	0.00214592	0.0192308	0	1	103.161	237.043	104.027	314.431	0.844725	34.872	34.7646	34.9525	74.8865	34.7825	75.1	Epsin-2	0.000750188	0.00096432	0.483258	311.815	1.66841	0.0684635	1.16085	0.883412	0	-10000000	103.161;180.932;91.671;66.1886;50.1382;233.002;0;0;0;0;62.187;0;
Z:\MS_data\7600_ZenoTof\2022\202210\20221012_MS_DC24_VACV_zenoSWATH_thermostability\20221010_MS_zenoSWATH_DC24_VACV_37C_r1-MS_DC24_VACV_zenoSWATH_37C_r1.mzML	20221010_MS_zenoSWATH_DC24_VACV_37C_r1-MS_DC24_VACV_zenoSWATH_37C_r1	37C_r1	P70121	P70121	ZHX1_MOUSE	Zhx1	1285.42	481.233	481.233	1285.42	481.233	481.233	481.233	AALVNPDSF	AALVNPDSF	AALVNPDSF2	2	0.0087146	0.856711	1	0.0599755	0.0607903	1	0.0596923	0	1	1285.42	481.233	939.475	0	0.766527	28.4577	28.3503	28.5114	51.9586	28.5731	51.5494	Zinc fingers and homeoboxes protein 1	0.0436006	0.0331998	0	0	1.06971	0.262385	1.9376	0.781809	0	-10000000	359.185;1324.7;208.442;206.523;2358.4;0;0;151.371;0;0;0;17.921;
Z:\MS_data\7600_ZenoTof\2022\202210\20221012_MS_DC24_VACV_zenoSWATH_thermostability\20221010_MS_zenoSWATH_DC24_VACV_37C_r2-MS_DC24_VACV_zenoSWATH_37C_r2.mzML	20221010_MS_zenoSWATH_DC24_VACV_37C_r2-MS_DC24_VACV_zenoSWATH_37C_r2	37C_r2	P70121	P70121	ZHX1_MOUSE	Zhx1	1813.49	949.835	0	1813.49	949.835			AALVNPDSF	AALVNPDSF	AALVNPDSF2	2	0.0337224	1	1	0.0635022	0.0636943	1	0.0639122	0	1	1813.49	949.835	1322.84	412.695	0.720029	28.2686	28.1881	28.5907	51.9586	28.5763	51.0152	Zinc fingers and homeoboxes protein 1	0.0436006	0.0331998	0.180331	565.764	0.668494	0.105092	1.24895	0.635215	0	-10000000	602.034;1763.31;108.005;235.05;1895.79;0;0;0;0;75.994;0;244.65;
Z:\MS_data\7600_ZenoTof\2022\202210\20221012_MS_DC24_VACV_zenoSWATH_thermostability\20221010_MS_zenoSWATH_DC24_VACV_37C_r3-MS_DC24_VACV_zenoSWATH_37C_r3.mzML	20221010_MS_zenoSWATH_DC24_VACV_37C_r3-MS_DC24_VACV_zenoSWATH_37C_r3	37C_r3	P70121	P70121	ZHX1_MOUSE	Zhx1	2010.75	918.343	918.343	2010.75	918.343	918.343	918.343	AALVNPDSF	AALVNPDSF	AALVNPDSF2	2	0.00665716	0.713559	1	0.0611326	0.0607029	1	0.0608808	0	1	2010.75	918.343	1536.88	279.816	0.7418	28.4299	28.2689	28.6446	51.9586	28.6023	51.4775	Zinc fingers and homeoboxes protein 1	0.0436006	0.0331998	0	366.094	0.972463	0.380466	1.5067	0.829266	0	-10000000	322.499;1901.48;206.778;172.1;3308.2;0;0;0;0;0;0;325.837;
Z:\MS_data\7600_ZenoTof\2022\202210\20221012_MS_DC24_VACV_zenoSWATH_thermostability\20221010_MS_zenoSWATH_DC24_VACV_41C_r2-MS_DC24_VACV_zenoSWATH_41C_r2.mzML	20221010_MS_zenoSWATH_DC24_VACV_41C_r2-MS_DC24_VACV_zenoSWATH_41C_r2	41C_r2	P70121	P70121	ZHX1_MOUSE	Zhx1	401.214	189.004	0	401.214	189.004			AALVNPDSF	AALVNPDSF	AALVNPDSF2	2	0.0124424	1	1	0.06125	0.0633147	1	0.0610063	0	1	401.214	189.004	283.135	54.9875	-0.0224604	28.4567	28.2688	28.5373	51.9586	28.5437	51.6708	Zinc fingers and homeoboxes protein 1	0.0436006	0.0331998	0	77.9195	1.52916	0.26171	0.924228	0.773939	0	-10000000	121.034;2057;155.268;17.4459;1553.73;0;0;0;0;0;0;0;
Z:\MS_data\7600_ZenoTof\2022\202210\20221012_MS_DC24_VACV_zenoSWATH_thermostability\20221010_MS_zenoSWATH_DC24_VACV_41C_r3-MS_DC24_VACV_zenoSWATH_41C_r3.mzML	20221010_MS_zenoSWATH_DC24_VACV_41C_r3-MS_DC24_VACV_zenoSWATH_41C_r3	41C_r3	P70121	P70121	ZHX1_MOUSE	Zhx1	390.612	192.376	192.376	390.612	192.376	192.376	192.376	AALVNPDSF	AALVNPDSF	AALVNPDSF2	2	0.00971772	0.768256	1	0.0640615	0.0642494	1	0.0644745	0	1	390.612	192.376	298.686	98.4397	0.645328	28.3755	28.2949	28.456	51.9586	28.5936	51.0378	Zinc fingers and homeoboxes protein 1	0.0436006	0.0331998	0.135948	128.736	1.15129	0.135262	0.766791	0.830171	0	-10000000	255.238;858.836;158.961;0;293.473;0;0;0;0;0;0;162.919;
Z:\MS_data\7600_ZenoTof\2022\202210\20221012_MS_DC24_VACV_zenoSWATH_thermostability\20221010_MS_zenoSWATH_DC24_VACV_45C_r1-MS_DC24_VACV_zenoSWATH_45C_r1.mzML	20221010_MS_zenoSWATH_DC24_VACV_45C_r1-MS_DC24_VACV_zenoSWATH_45C_r1	45C_r1	P70121	P70121	ZHX1_MOUSE	Zhx1	1124.91	439.121	0	1124.91	439.121			AALVNPDSF	AALVNPDSF	AALVNPDSF2	2	0.0158287	0.971631	1	0.0618892	0.0627426	1	0.061599	0	1	1124.91	439.121	868.117	89.2182	0.140855	28.4298	28.3225	28.5372	51.9586	28.5824	51.3213	Zinc fingers and homeoboxes protein 1	0.0436006	0.0331998	0.0227741	115.609	1.15468	0.202485	0.484207	0.755206	0	-10000000	462.974;2876.73;193.116;55.4024;757.98;0;0;151.369;0;253.309;0;0;
Z:\MS_data\7600_ZenoTof\2022\202210\20221012_MS_DC24_VACV_zenoSWATH_thermostability\20221010_MS_zenoSWATH_DC24_VACV_45C_r2-MS_DC24_VACV_zenoSWATH_45C_r2.mzML	20221010_MS_zenoSWATH_DC24_VACV_45C_r2-MS_DC24_VACV_zenoSWATH_45C_r2	45C_r2	P70121	P70121	ZHX1_MOUSE	Zhx1	375.013	247.965	0	375.013	247.965			AALVNPDSF	AALVNPDSF	AALVNPDSF2	2	0.0275827	1	1	0.0583153	0.0585714	1	0.0586957	0	1	375.013	247.965	310.112	63.2086	0.32176	28.3765	28.296	28.4839	51.9586	28.5996	51.3805	Zinc fingers and homeoboxes protein 1	0.0436006	0.0331998	0	76.4371	1.28122	0.0968152	1.64506	0.685351	0	-10000000	253.515;820.378;274.723;240.944;849.649;0;0;75.6842;0;0;0;105.354;
Z:\MS_data\7600_ZenoTof\2022\202210\20221012_MS_DC24_VACV_zenoSWATH_thermostability\20221010_MS_zenoSWATH_DC24_VACV_45C_r3-MS_DC24_VACV_zenoSWATH_45C_r3.mzML	20221010_MS_zenoSWATH_DC24_VACV_45C_r3-MS_DC24_VACV_zenoSWATH_45C_r3	45C_r3	P70121	P70121	ZHX1_MOUSE	Zhx1	561.126	229.976	0	561.126	229.976			AALVNPDSF	AALVNPDSF	AALVNPDSF2	2	0.0180389	1	1	0.0667539	0.0669266	1	0.0665349	0	1	561.126	229.976	430.112	567.078	0.517348	28.4301	28.1617	28.6717	51.9586	28.615	51.4382	Zinc fingers and homeoboxes protein 1	0.0436006	0.0331998	0	739.811	0.562493	0.17912	1.50889	0.628334	0	-10000000	458.904;2660.81;62.9567;258.152;2978.03;0;68.0684;20.1997;0;0;0;203.649;
Z:\MS_data\7600_ZenoTof\2022\202210\20221012_MS_DC24_VACV_zenoSWATH_thermostability\20221010_MS_zenoSWATH_DC24_VACV_49C_r1-MS_DC24_VACV_zenoSWATH_49C_r1.mzML	20221010_MS_zenoSWATH_DC24_VACV_49C_r1-MS_DC24_VACV_zenoSWATH_49C_r1	49C_r1	P70121	P70121	ZHX1_MOUSE	Zhx1	209.073	155.823	155.823	209.073	155.823	155.823	155.823	AALVNPDSF	AALVNPDSF	AALVNPDSF2	2	0.00175593	0.173732	1	0.0647003	0.0659134	1	0.0642378	0	1	209.073	155.823	164.028	73.757	0.847389	28.4051	28.2977	28.4856	51.9586	28.5466	51.6285	Zinc fingers and homeoboxes protein 1	0.0436006	0.0331998	0	94.0122	1.88942	0.354847	1.77096	0.954302	0	-10000000	650.009;496.712;80.681;183.889;212.413;0;0;75.6862;0;0;0;34.213;
Z:\MS_data\7600_ZenoTof\2022\202210\20221012_MS_DC24_VACV_zenoSWATH_thermostability\20221010_MS_zenoSWATH_DC24_VACV_49C_r2-MS_DC24_VACV_zenoSWATH_49C_r2.mzML	20221010_MS_zenoSWATH_DC24_VACV_49C_r2-MS_DC24_VACV_zenoSWATH_49C_r2	49C_r2	P70121	P70121	ZHX1_MOUSE	Zhx1	553.854	331.201	331.201	553.854	331.201	331.201	331.201	AALVNPDSF	AALVNPDSF	AALVNPDSF2	2	0.00584795	0.247702	1	0.0645914	0.0648148	1	0.0649961	0	1	553.854	331.201	475.52	147.795	0.777466	28.43	28.3764	28.4837	51.9586	28.6305	51.3881	Zinc fingers and homeoboxes protein 1	0.0436006	0.0331998	0.174034	172.142	1.47363	0.0252169	1.12894	0.941031	0	-10000000	186.569;624.105;51.6947;137.68;649.118;0;0;0;0;0;0;0;
Z:\MS_data\7600_ZenoTof\2022\202210\20221012_MS_DC24_VACV_zenoSWATH_thermostability\20221010_MS_zenoSWATH_DC24_VACV_49C_r3-MS_DC24_VACV_zenoSWATH_49C_r3.mzML	20221010_MS_zenoSWATH_DC24_VACV_49C_r3-MS_DC24_VACV_zenoSWATH_49C_r3	49C_r3	P70121	P70121	ZHX1_MOUSE	Zhx1	0	0	0					AALVNPDSF	AALVNPDSF	AALVNPDSF2	2	0.0217391	1	1	0.064574	0.0657194	1	0.063234	0	1	0	0	0	42.9389	0	28.4308	28.3772	28.4845	51.9586	28.5891	51.6172	Zinc fingers and homeoboxes protein 1	0.0436006	0.0331998	0	54.2049	1.1952	0.155547	0.314275	0.764425	0	-10000000	82.9368;1866.22;27.8782;0;370.291;53.3773;0;0;0;0;0;31.4977;
Z:\MS_data\7600_ZenoTof\2022\202210\20221012_MS_DC24_VACV_zenoSWATH_thermostability\20221010_MS_zenoSWATH_DC24_VACV_53C_r1-MS_DC24_VACV_zenoSWATH_53C_r1.mzML	20221010_MS_zenoSWATH_DC24_VACV_53C_r1-MS_DC24_VACV_zenoSWATH_53C_r1	53C_r1	P70121	P70121	ZHX1_MOUSE	Zhx1	1702.88	1327.45	0	1702.88	1327.45			AALVNPDSF	AALVNPDSF	AALVNPDSF2	2	0.0152979	0.955009	1	0.0651303	0.0654113	1	0.0656566	0	1	1702.88	1327.45	1767.18	387.172	0.944801	28.404	28.3235	28.5382	51.9586	28.6172	51.513	Zinc fingers and homeoboxes protein 1	0.0436006	0.0331998	0.35678	373.084	1.32952	0.0815507	0.129042	0.793637	0	-10000000	20.5382;1702.88;28.8012;68.8405;1333.88;0;0;0;0;0;0;0;
Z:\MS_data\7600_ZenoTof\2022\202210\20221012_MS_DC24_VACV_zenoSWATH_thermostability\20221010_MS_zenoSWATH_DC24_VACV_53C_r3-MS_DC24_VACV_zenoSWATH_53C_r3.mzML	20221010_MS_zenoSWATH_DC24_VACV_53C_r3-MS_DC24_VACV_zenoSWATH_53C_r3	53C_r3	P70121	P70121	ZHX1_MOUSE	Zhx1	190.341	283.211	0	190.341	283.211			AALVNPDSF	AALVNPDSF	AALVNPDSF2	2	0.0228401	0.849048	1	0.0609137	0.0625782	1	0.0588235	0	1	190.341	283.211	212.511	35.4599	0.801784	28.3764	28.3227	28.43	51.9586	28.6143	51.2112	Zinc fingers and homeoboxes protein 1	0.0436006	0.0331998	0	31.7606	0.827608	0.0160176	0.0124342	0.841103	0	-10000000	0;220.782;0;24.7544;154.269;0;0;0;0;0;0;0;
Z:\MS_data\7600_ZenoTof\2022\202210\20221012_MS_DC24_VACV_zenoSWATH_thermostability\20221010_MS_zenoSWATH_DC24_VACV_37C_r1-MS_DC24_VACV_zenoSWATH_37C_r1.mzML	20221010_MS_zenoSWATH_DC24_VACV_37C_r1-MS_DC24_VACV_zenoSWATH_37C_r1	37C_r1	P48410	P48410	ABCD1_MOUSE	Abcd1	4162.51	1558.35	1558.35	4162.51	1558.35	1558.35	1558.35	AALVSRTFL	AALVSRTFL	AALVSRTFL2	2	0.000472865	0.000472865	0.00320256	0.00535332	0.00529101	0.0112867	0.00539374	0	1	4162.51	1558.35	3042.25	1023.5	0.837462	26.9825	26.8482	27.1166	45.8163	27.2783	44.7008	ATP-binding cassette sub-family D member 1	0.000750188	0.00174825	0.902108	1400.39	3.40864	0.404607	2.99302	0.999846	0	-10000000	2359.34;1776.12;612.72;582.596;119.324;69.4275;292.979;0;0;415.219;52.9096;104.951;
Z:\MS_data\7600_ZenoTof\2022\202210\20221012_MS_DC24_VACV_zenoSWATH_thermostability\20221010_MS_zenoSWATH_DC24_VACV_37C_r2-MS_DC24_VACV_zenoSWATH_37C_r2.mzML	20221010_MS_zenoSWATH_DC24_VACV_37C_r2-MS_DC24_VACV_zenoSWATH_37C_r2	37C_r2	P48410	P48410	ABCD1_MOUSE	Abcd1	2258.51	1182.92	1182.92	2258.51	1182.92	1182.92	1182.92	AALVSRTFL	AALVSRTFL	AALVSRTFL2	2	0.00032716	0.00032716	0.00320256	0.00538793	0.00532481	0.0112867	0.00542299	0	1	2258.51	1182.92	1647.47	560.62	0.743302	27.0081	26.7665	27.1423	45.8163	27.2404	44.8782	ATP-binding cassette sub-family D member 1	0.000750188	0.00174825	0.884298	768.553	2.63486	0.476009	1.4329	0.99991	0	-10000000	2237.78;1364.87;363.554;332.218;20.6435;298.433;167.864;0;25.0414;113.359;32.7888;0;
Z:\MS_data\7600_ZenoTof\2022\202210\20221012_MS_DC24_VACV_zenoSWATH_thermostability\20221010_MS_zenoSWATH_DC24_VACV_37C_r3-MS_DC24_VACV_zenoSWATH_37C_r3.mzML	20221010_MS_zenoSWATH_DC24_VACV_37C_r3-MS_DC24_VACV_zenoSWATH_37C_r3	37C_r3	P48410	P48410	ABCD1_MOUSE	Abcd1	2006.34	916.327	916.327	2006.34	916.327	916.327	916.327	AALVSRTFL	AALVSRTFL	AALVSRTFL2	2	0.000292127	0.000292127	0.00320256	0.00554939	0.00548246	0.0112867	0.00447427	0	1	2006.34	916.327	1533.5	943.327	0.700641	27.062	26.8741	27.1157	45.8163	27.2484	44.8314	ATP-binding cassette sub-family D member 1	0.000750188	0.00174825	0.740842	1234.19	2.04792	0.548688	1.46873	0.999916	0	-10000000	1496.75;2041.24;920.214;395.555;339.368;0;476.513;0;85.3414;64.6181;236.973;0;
Z:\MS_data\7600_ZenoTof\2022\202210\20221012_MS_DC24_VACV_zenoSWATH_thermostability\20221010_MS_zenoSWATH_DC24_VACV_41C_r1-MS_DC24_VACV_zenoSWATH_41C_r1.mzML	20221010_MS_zenoSWATH_DC24_VACV_41C_r1-MS_DC24_VACV_zenoSWATH_41C_r1	41C_r1	P48410	P48410	ABCD1_MOUSE	Abcd1	2141.96	915.943	915.943	2141.96	915.943	915.943	915.943	AALVSRTFL	AALVSRTFL	AALVSRTFL2	2	3.19762e-05	3.19762e-05	0.00320256	0.00638978	0.00631579	0.0112867	0.00643777	0	1	2141.96	915.943	1667.45	788.898	0.774329	27.036	26.7944	27.0897	45.8163	27.2288	45.1043	ATP-binding cassette sub-family D member 1	0.000750188	0.00174825	0.936851	1013.4	2.48231	0.590439	1.33803	0.999989	0	-10000000	1655.72;936.24;741.553;444.63;0;76.6817;345.7;89.6594;200.731;259.579;15.2768;0;
Z:\MS_data\7600_ZenoTof\2022\202210\20221012_MS_DC24_VACV_zenoSWATH_thermostability\20221010_MS_zenoSWATH_DC24_VACV_41C_r2-MS_DC24_VACV_zenoSWATH_41C_r2.mzML	20221010_MS_zenoSWATH_DC24_VACV_41C_r2-MS_DC24_VACV_zenoSWATH_41C_r2	41C_r2	P48410	P48410	ABCD1_MOUSE	Abcd1	3002.53	1414.43	1414.43	3002.53	1414.43	1414.43	1414.43	AALVSRTFL	AALVSRTFL	AALVSRTFL2	2	0.00066313	0.00176209	0.00320256	0.00618557	0.00612245	0.0112867	0.00623053	0	1	3002.53	1414.43	2118.87	544.049	0.817502	27.0083	26.8204	27.1425	45.8163	27.2077	44.8336	ATP-binding cassette sub-family D member 1	0.000750188	0.00174825	0.804837	770.94	2.98131	0.828814	1.47584	0.999506	0	-10000000	1811.99;2180.26;559.491;466.736;0;76.6816;0;179.319;19.0316;43.3868;52.1649;0;
Z:\MS_data\7600_ZenoTof\2022\202210\20221012_MS_DC24_VACV_zenoSWATH_thermostability\20221010_MS_zenoSWATH_DC24_VACV_41C_r3-MS_DC24_VACV_zenoSWATH_41C_r3.mzML	20221010_MS_zenoSWATH_DC24_VACV_41C_r3-MS_DC24_VACV_zenoSWATH_41C_r3	41C_r3	P48410	P48410	ABCD1_MOUSE	Abcd1	2762.07	1360.32	1360.32	2762.07	1360.32	1360.32	1360.32	AALVSRTFL	AALVSRTFL	AALVSRTFL2	2	0.000478188	0.000478188	0.00320256	0.00448431	0.00442968	0.0112867	0.00451977	0	1	2762.07	1360.32	2112.05	579.728	0.634755	26.9809	26.8736	27.1151	45.8163	27.2659	45.1588	ATP-binding cassette sub-family D member 1	0.000750188	0.00174825	0.876128	758.15	2.87386	0.597224	1.50689	0.999873	0	-10000000	2383.06;1516.26;1092.65;632.607;62.6107;0;17.3847;0;555.323;117.236;0;0;
Z:\MS_data\7600_ZenoTof\2022\202210\20221012_MS_DC24_VACV_zenoSWATH_thermostability\20221010_MS_zenoSWATH_DC24_VACV_45C_r1-MS_DC24_VACV_zenoSWATH_45C_r1.mzML	20221010_MS_zenoSWATH_DC24_VACV_45C_r1-MS_DC24_VACV_zenoSWATH_45C_r1	45C_r1	P48410	P48410	ABCD1_MOUSE	Abcd1	3661.69	1429.38	1429.38	3661.69	1429.38	1429.38	1429.38	AALVSRTFL	AALVSRTFL	AALVSRTFL2	2	0.000461748	0.000461748	0.00320256	0.00445434	0.00440044	0.0112867	0.00448934	0	1	3661.69	1429.38	2825.81	761.667	0.852713	27.0083	26.8741	27.1157	45.8163	27.272	45.0337	ATP-binding cassette sub-family D member 1	0.000750188	0.00174825	0.915867	986.967	3.1303	0.539096	2.8405	0.999846	0	-10000000	1981.48;1499.67;1085.28;449.803;0;207.505;197.503;0;142.437;219.149;0;180.671;
Z:\MS_data\7600_ZenoTof\2022\202210\20221012_MS_DC24_VACV_zenoSWATH_thermostability\20221010_MS_zenoSWATH_DC24_VACV_45C_r2-MS_DC24_VACV_zenoSWATH_45C_r2.mzML	20221010_MS_zenoSWATH_DC24_VACV_45C_r2-MS_DC24_VACV_zenoSWATH_45C_r2	45C_r2	P48410	P48410	ABCD1_MOUSE	Abcd1	1595.63	1055.05	1055.05	1595.63	1055.05	1055.05	1055.05	AALVSRTFL	AALVSRTFL	AALVSRTFL2	2	0.000761615	0.00731075	0.00320256	0.00764331	0.00754717	0.0112867	0.00771208	0	1	1595.63	1055.05	1319.48	629.631	0.831221	27.0086	26.8744	27.1428	45.8163	27.2403	44.8461	ATP-binding cassette sub-family D member 1	0.000750188	0.00174825	0.838905	761.403	2.24869	0.534369	0.994853	0.998402	0	-10000000	1176.12;1046.03;616.117;161.171;0;35.2321;0;0;113.788;31.3859;0;69.9674;
Z:\MS_data\7600_ZenoTof\2022\202210\20221012_MS_DC24_VACV_zenoSWATH_thermostability\20221010_MS_zenoSWATH_DC24_VACV_45C_r3-MS_DC24_VACV_zenoSWATH_45C_r3.mzML	20221010_MS_zenoSWATH_DC24_VACV_45C_r3-MS_DC24_VACV_zenoSWATH_45C_r3	45C_r3	P48410	P48410	ABCD1_MOUSE	Abcd1	3502.47	1435.48	1435.48	3502.47	1435.48	1435.48	1435.48	AALVSRTFL	AALVSRTFL	AALVSRTFL2	2	0.000587889	0.00514018	0.00320256	0.00461894	0.004561	0.0112867	0.00465116	0	1	3502.47	1435.48	2684.7	895.54	0.866272	26.955	26.8207	27.116	45.8163	27.2561	45.0989	ATP-binding cassette sub-family D member 1	0.000750188	0.00174825	0.917928	1168.32	3.37743	0.614729	1.62362	0.998408	0	-10000000	1552.51;2289.79;700.212;502.169;215.964;0;223.438;0;122.403;259.767;0;0;
Z:\MS_data\7600_ZenoTof\2022\202210\20221012_MS_DC24_VACV_zenoSWATH_thermostability\20221010_MS_zenoSWATH_DC24_VACV_49C_r1-MS_DC24_VACV_zenoSWATH_49C_r1.mzML	20221010_MS_zenoSWATH_DC24_VACV_49C_r1-MS_DC24_VACV_zenoSWATH_49C_r1	49C_r1	P48410	P48410	ABCD1_MOUSE	Abcd1	84.0785	62.6638	62.6638	84.0785	62.6638	62.6638	62.6638	AALVSRTFL	AALVSRTFL	AALVSRTFL2	2	0.000897666	0.148628	0.00320256	0.00934579	0.00920245	0.0112867	0.00941915	0	1	84.0785	62.6638	65.9635	223.033	0.474571	27.0103	26.9566	27.064	45.8163	27.2091	44.9389	ATP-binding cassette sub-family D member 1	0.000750188	0.00174825	0.748809	284.283	1.60195	0.00877336	0.366743	0.960645	0	-10000000	243.1;34.4908;23.501;18.6569;0;0;48.1645;0;0;0;0;0;
Z:\MS_data\7600_ZenoTof\2022\202210\20221012_MS_DC24_VACV_zenoSWATH_thermostability\20221010_MS_zenoSWATH_DC24_VACV_49C_r2-MS_DC24_VACV_zenoSWATH_49C_r2.mzML	20221010_MS_zenoSWATH_DC24_VACV_49C_r2-MS_DC24_VACV_zenoSWATH_49C_r2	49C_r2	P48410	P48410	ABCD1_MOUSE	Abcd1	1807.68	1080.98	1080.98	1807.68	1080.98	1080.98	1080.98	AALVSRTFL	AALVSRTFL	AALVSRTFL2	2	0.000857633	0.00792783	0.00320256	0.00815217	0.00803213	0.0112867	0.00823045	0	1	1807.68	1080.98	1552.01	491.681	0.859904	27.0084	26.8743	27.0889	45.8163	27.2451	44.7107	ATP-binding cassette sub-family D member 1	0.000750188	0.00174825	0.795594	572.677	3.55934	0.509492	2.43285	0.997998	0	-10000000	1320.65;1216.11;966.083;223.099;165.602;136.783;0;0;50.083;49.479;0;0;
Z:\MS_data\7600_ZenoTof\2022\202210\20221012_MS_DC24_VACV_zenoSWATH_thermostability\20221010_MS_zenoSWATH_DC24_VACV_49C_r3-MS_DC24_VACV_zenoSWATH_49C_r3.mzML	20221010_MS_zenoSWATH_DC24_VACV_49C_r3-MS_DC24_VACV_zenoSWATH_49C_r3	49C_r3	P48410	P48410	ABCD1_MOUSE	Abcd1	871.896	673.316	673.316	871.896	673.316	673.316	673.316	AALVSRTFL	AALVSRTFL	AALVSRTFL2	2	0.000940734	0.0212065	0.00320256	0.00857143	0.00843882	0.0112867	0.00865801	0	1	871.896	673.316	690.68	542.394	0.770184	27.036	26.875	27.1434	45.8163	27.2478	45.0182	ATP-binding cassette sub-family D member 1	0.000750188	0.00174825	0.919234	684.704	2.56214	0.46967	1.41333	0.995207	0	-10000000	817.587;979.681;326.18;477.709;66.2408;0;0;29.7883;238.998;36.1863;0;139.937;
Z:\MS_data\7600_ZenoTof\2022\202210\20221012_MS_DC24_VACV_zenoSWATH_thermostability\20221010_MS_zenoSWATH_DC24_VACV_53C_r1-MS_DC24_VACV_zenoSWATH_53C_r1.mzML	20221010_MS_zenoSWATH_DC24_VACV_53C_r1-MS_DC24_VACV_zenoSWATH_53C_r1	53C_r1	P48410	P48410	ABCD1_MOUSE	Abcd1	244.683	190.738	190.738	244.683	190.738	190.738	190.738	AALVSRTFL	AALVSRTFL	AALVSRTFL2	2	0.000898473	0.0485959	0.00320256	0.00739372	0.00724638	0.0112867	0.00747664	0	1	244.683	190.738	253.922	353.702	0.766991	27.0361	26.9824	27.0898	45.8163	27.2748	44.753	ATP-binding cassette sub-family D member 1	0.000750188	0.00174825	0.78405	340.832	2.21574	0.22165	0.650965	0.986942	0	-10000000	246.278;278.82;547.034;157.093;178.079;0;0;0;0;69.9723;0;0;
Z:\MS_data\7600_ZenoTof\2022\202210\20221012_MS_DC24_VACV_zenoSWATH_thermostability\20221010_MS_zenoSWATH_DC24_VACV_53C_r2-MS_DC24_VACV_zenoSWATH_53C_r2.mzML	20221010_MS_zenoSWATH_DC24_VACV_53C_r2-MS_DC24_VACV_zenoSWATH_53C_r2	53C_r2	P48410	P48410	ABCD1_MOUSE	Abcd1	455.016	365.585	365.585	455.016	365.585	365.585	365.585	AALVSRTFL	AALVSRTFL	AALVSRTFL2	2	0.00102775	0.0185453	0.00320256	0.0103448	0.0101868	0.0112867	0.0104348	0	1	455.016	365.585	347.326	246.274	0.815321	26.9814	26.9277	27.1156	45.8163	27.1923	44.9123	ATP-binding cassette sub-family D member 1	0.000750188	0.00174825	0.581425	322.633	2.01586	0.407818	0.807237	0.994706	0	-10000000	149.186;329.631;84.9426;121.817;0;0;0;30.6729;0;0;0;0;
Z:\MS_data\7600_ZenoTof\2022\202210\20221012_MS_DC24_VACV_zenoSWATH_thermostability\20221010_MS_zenoSWATH_DC24_VACV_53C_r3-MS_DC24_VACV_zenoSWATH_53C_r3.mzML	20221010_MS_zenoSWATH_DC24_VACV_53C_r3-MS_DC24_VACV_zenoSWATH_53C_r3	53C_r3	P48410	P48410	ABCD1_MOUSE	Abcd1	571.796	850.783	850.783	571.796	850.783	850.783	850.783	AALVSRTFL	AALVSRTFL	AALVSRTFL2	2	0.00835073	0.538268	0.00320256	0.016158	0.0158451	0.0112867	0.0145191	0	1	571.796	850.783	638.397	250.865	0.820706	26.901	26.8473	27.0889	45.8163	27.2429	44.2887	ATP-binding cassette sub-family D member 1	0.000750188	0.00174825	0.484083	224.694	1.21767	0.154734	0.141149	0.893044	0	-10000000	571.796;174.819;0;64.9069;0;0;0;0;0;0;132.274;0;
Z:\MS_data\7600_ZenoTof\2022\202210\20221012_MS_DC24_VACV_zenoSWATH_thermostability\20221010_MS_zenoSWATH_DC24_VACV_37C_r1-MS_DC24_VACV_zenoSWATH_37C_r1.mzML	20221010_MS_zenoSWATH_DC24_VACV_37C_r1-MS_DC24_VACV_zenoSWATH_37C_r1	37C_r1	P61982	P61982	1433G_MOUSE	Ywhag	11864.3	4441.74	2738.2	11864.3	4441.74	2738.2	2738.2	AAM(UniMod:35)KNVTEL	AAMKNVTEL	AAM(UniMod:35)KNVTEL2	2	0.000590319	0.00344129	0.00223214	0.00294985	0.00285714	0.00214592	0.00299401	0	1	11864.3	4441.74	8671.27	7389.85	0.812748	12.7297	12.5955	12.864	-9.53719	12.7423	-9.56807	14-3-3 protein gamma	0.000725216	0.00096432	0.974133	10111	4.16828	0.287925	5.86281	0.99888	0	-10000000	3425.58;7182.69;5399.25;451.304;3003.74;373.736;1990.56;1405.82;382.095;0;3944.16;373.203;
Z:\MS_data\7600_ZenoTof\2022\202210\20221012_MS_DC24_VACV_zenoSWATH_thermostability\20221010_MS_zenoSWATH_DC24_VACV_37C_r2-MS_DC24_VACV_zenoSWATH_37C_r2.mzML	20221010_MS_zenoSWATH_DC24_VACV_37C_r2-MS_DC24_VACV_zenoSWATH_37C_r2	37C_r2	P61982	P61982	1433G_MOUSE	Ywhag	8013.24	4197.03	6319.42	8013.24	4197.03	6319.42	6319.42	AAM(UniMod:35)KNVTEL	AAMKNVTEL	AAM(UniMod:35)KNVTEL2	2	0.000575374	0.00185867	0.00223214	0.00294985	0.00285714	0.00214592	0.00298507	0	1	4324.95	2265.24	3154.83	3785.36	0.775914	12.7028	12.5686	12.7833	-9.53719	12.6468	-9.21992	14-3-3 protein gamma	0.000725216	0.00096432	0.875769	5189.36	3.48363	0.349759	4.29287	0.99949	0	-10000000	1965.81;3785.51;2208;98.9845;1111.51;91.4323;578.304;357.933;53.2716;0;1923.66;120.794;
Z:\MS_data\7600_ZenoTof\2022\202210\20221012_MS_DC24_VACV_zenoSWATH_thermostability\20221010_MS_zenoSWATH_DC24_VACV_37C_r3-MS_DC24_VACV_zenoSWATH_37C_r3.mzML	20221010_MS_zenoSWATH_DC24_VACV_37C_r3-MS_DC24_VACV_zenoSWATH_37C_r3	37C_r3	P61982	P61982	1433G_MOUSE	Ywhag	6180.79	2822.86	1671.42	6180.79	2822.86	1671.42	1671.42	AAM(UniMod:35)KNVTEL	AAMKNVTEL	AAM(UniMod:35)KNVTEL2	2	0.000122919	0.000122919	0.00223214	0.00310559	0.003003	0.00214592	0.00314465	0	1	6180.79	2822.86	4724.15	4419.92	0.621318	12.676	12.5955	12.8638	-9.53719	12.6667	-9.46226	14-3-3 protein gamma	0.000725216	0.00096432	0.886007	5782.75	3.74087	0.564521	5.31171	0.999965	0	-10000000	2084.92;4727.11;3799.59;292.654;1824.51;154.165;1121.54;846.174;230.72;0;1496.5;274.642;
Z:\MS_data\7600_ZenoTof\2022\202210\20221012_MS_DC24_VACV_zenoSWATH_thermostability\20221010_MS_zenoSWATH_DC24_VACV_41C_r1-MS_DC24_VACV_zenoSWATH_41C_r1.mzML	20221010_MS_zenoSWATH_DC24_VACV_41C_r1-MS_DC24_VACV_zenoSWATH_41C_r1	41C_r1	P61982	P61982	1433G_MOUSE	Ywhag	11626	4971.51	7083.76	11626	4971.51	7083.76	7083.76	AAM(UniMod:35)KNVTEL	AAMKNVTEL	AAM(UniMod:35)KNVTEL2	2	0.000600601	0.000662506	0.00223214	0.00303951	0.00294118	0.00214592	0.00307692	0	1	11626	4971.51	9050.5	6622.96	0.858467	12.7303	12.5961	12.8914	-9.53719	12.7377	-9.53746	14-3-3 protein gamma	0.000725216	0.00096432	0.981883	8507.68	4.16703	0.530539	5.33228	0.999775	0	-10000000	2999.78;5261.04;5395.8;263.053;2229.87;573.781;1211.69;1287.63;597.245;0;2480;662.86;
Z:\MS_data\7600_ZenoTof\2022\202210\20221012_MS_DC24_VACV_zenoSWATH_thermostability\20221010_MS_zenoSWATH_DC24_VACV_41C_r2-MS_DC24_VACV_zenoSWATH_41C_r2.mzML	20221010_MS_zenoSWATH_DC24_VACV_41C_r2-MS_DC24_VACV_zenoSWATH_41C_r2	41C_r2	P61982	P61982	1433G_MOUSE	Ywhag	12189.5	5742.26	7511.41	12189.5	5742.26	7511.41	7511.41	AAM(UniMod:35)KNVTEL	AAMKNVTEL	AAM(UniMod:35)KNVTEL2	2	7.24209e-05	7.24209e-05	0.00223214	0.00290698	0.0028169	0.00214592	0.00294985	0	1	12189.5	5742.26	8602.1	8621.49	0.74274	12.676	12.5149	12.837	-9.53719	12.7287	-9.71557	14-3-3 protein gamma	0.000725216	0.00096432	0.942939	12217	4.07833	0.68137	5.67963	0.99998	0	-10000000	5075.86;7789.22;7593.17;313.45;3444.51;516.225;1969.25;1946.45;503.083;73.1543;4499.68;101.964;
Z:\MS_data\7600_ZenoTof\2022\202210\20221012_MS_DC24_VACV_zenoSWATH_thermostability\20221010_MS_zenoSWATH_DC24_VACV_41C_r3-MS_DC24_VACV_zenoSWATH_41C_r3.mzML	20221010_MS_zenoSWATH_DC24_VACV_41C_r3-MS_DC24_VACV_zenoSWATH_41C_r3	41C_r3	P61982	P61982	1433G_MOUSE	Ywhag	12225	6020.82	4581.44	12225	6020.82	4581.44	4581.44	AAM(UniMod:35)KNVTEL	AAMKNVTEL	AAM(UniMod:35)KNVTEL2	2	0.000287212	0.000287212	0.00223214	0.00284091	0.00275482	0.00214592	0.00288184	0	1	12225	6020.82	9348	7061.4	0.781314	12.7293	12.5414	12.8904	-9.53719	12.6911	-9.337	14-3-3 protein gamma	0.000725216	0.00096432	0.923229	9234.68	3.94338	0.246381	5.55754	0.999924	0	-10000000	3357.65;6015.99;6331.59;34.3503;2547.82;474.677;1148.3;1792.46;400.104;68.1027;3243.39;277.445;
Z:\MS_data\7600_ZenoTof\2022\202210\20221012_MS_DC24_VACV_zenoSWATH_thermostability\20221010_MS_zenoSWATH_DC24_VACV_45C_r1-MS_DC24_VACV_zenoSWATH_45C_r1.mzML	20221010_MS_zenoSWATH_DC24_VACV_45C_r1-MS_DC24_VACV_zenoSWATH_45C_r1	45C_r1	P61982	P61982	1433G_MOUSE	Ywhag	8994.09	3510.95	4005.09	8994.09	3510.95	4005.09	4005.09	AAM(UniMod:35)KNVTEL	AAMKNVTEL	AAM(UniMod:35)KNVTEL2	2	0.00062461	0.00110278	0.00223214	0.00296736	0.00287356	0.00214592	0.00301205	0	1	8994.09	3510.95	6940.96	7866.64	0.833166	12.7028	12.6222	12.8638	-9.53719	12.757	-9.708	14-3-3 protein gamma	0.000725216	0.00096432	0.969782	10193.6	4.36858	0.691882	6.12708	0.999632	0	-10000000	4686.97;5353.54;5486.66;473.904;2754.64;552.429;1858.32;973.135;784.449;0;3404.3;853.38;
Z:\MS_data\7600_ZenoTof\2022\202210\20221012_MS_DC24_VACV_zenoSWATH_thermostability\20221010_MS_zenoSWATH_DC24_VACV_45C_r2-MS_DC24_VACV_zenoSWATH_45C_r2.mzML	20221010_MS_zenoSWATH_DC24_VACV_45C_r2-MS_DC24_VACV_zenoSWATH_45C_r2	45C_r2	P61982	P61982	1433G_MOUSE	Ywhag	5925.75	3918.2	5123.56	5925.75	3918.2	5123.56	5123.56	AAM(UniMod:35)KNVTEL	AAMKNVTEL	AAM(UniMod:35)KNVTEL2	2	2.77688e-05	2.77688e-05	0.00223214	0.00342466	0.00330033	0.00214592	0.00348432	0	1	5925.75	3918.2	4900.21	4851.84	0.806581	12.6761	12.5419	12.864	-9.53719	12.6935	-9.62763	14-3-3 protein gamma	0.000725216	0.00096432	0.931256	5867.25	3.79403	0.362076	4.97633	0.999994	0	-10000000	2737.4;3261.16;3784.93;263.278;1207.78;207.223;962.284;801.059;133.555;0;1933.23;220.755;
Z:\MS_data\7600_ZenoTof\2022\202210\20221012_MS_DC24_VACV_zenoSWATH_thermostability\20221010_MS_zenoSWATH_DC24_VACV_45C_r3-MS_DC24_VACV_zenoSWATH_45C_r3.mzML	20221010_MS_zenoSWATH_DC24_VACV_45C_r3-MS_DC24_VACV_zenoSWATH_45C_r3	45C_r3	P61982	P61982	1433G_MOUSE	Ywhag	14820	6073.92	5342.66	14820	6073.92	5342.66	5342.66	AAM(UniMod:35)KNVTEL	AAMKNVTEL	AAM(UniMod:35)KNVTEL2	2	2.0562e-05	2.0562e-05	0.00223214	0.00304878	0.00294985	0.00214592	0.00308642	0	1	14820	6073.92	11359.7	8110.27	0.891151	12.703	12.5152	12.864	-9.53719	12.6862	-9.62867	14-3-3 protein gamma	0.000725216	0.00096432	0.959177	10580.7	4.73916	0.286805	6.02632	0.999994	0	-10000000	3719.45;7424.7;5170.69;190.511;3019.16;401.433;1926.14;1512.83;273.488;0;3881.51;960.948;
Z:\MS_data\7600_ZenoTof\2022\202210\20221012_MS_DC24_VACV_zenoSWATH_thermostability\20221010_MS_zenoSWATH_DC24_VACV_49C_r1-MS_DC24_VACV_zenoSWATH_49C_r1.mzML	20221010_MS_zenoSWATH_DC24_VACV_49C_r1-MS_DC24_VACV_zenoSWATH_49C_r1	49C_r1	P61982	P61982	1433G_MOUSE	Ywhag	2058.94	1534.53	1957.81	2058.94	1534.53	1957.81	1957.81	AAM(UniMod:35)KNVTEL	AAMKNVTEL	AAM(UniMod:35)KNVTEL2	2	0.000897666	0.0474977	0.00223214	0.00505051	0.00478469	0.00214592	0.00512821	0	1	2058.94	1534.53	1615.34	2129.09	0.775628	12.7306	12.5695	12.8648	-9.53719	12.674	-9.35288	14-3-3 protein gamma	0.000725216	0.00096432	0.939957	2713.78	2.57371	0.254886	3.3913	0.987077	0	-10000000	411.03;1019.81;1512.54;0;303.944;208.891;228.621;297.16;79.9072;0;798.191;0;
Z:\MS_data\7600_ZenoTof\2022\202210\20221012_MS_DC24_VACV_zenoSWATH_thermostability\20221010_MS_zenoSWATH_DC24_VACV_49C_r2-MS_DC24_VACV_zenoSWATH_49C_r2.mzML	20221010_MS_zenoSWATH_DC24_VACV_49C_r2-MS_DC24_VACV_zenoSWATH_49C_r2	49C_r2	P61982	P61982	1433G_MOUSE	Ywhag	15610.7	9335.08	8439.4	15610.7	9335.08	8439.4	8439.4	AAM(UniMod:35)KNVTEL	AAMKNVTEL	AAM(UniMod:35)KNVTEL2	2	5.96098e-05	5.96098e-05	0.00223214	0.00395257	0.00378788	0.00214592	0.00401606	0	1	15610.7	9335.08	13402.8	9626.44	0.852318	12.7297	12.5418	12.8907	-9.53719	12.7309	-9.62016	14-3-3 protein gamma	0.000725216	0.00096432	0.968009	11212.3	4.74128	0.365426	6.59589	0.999985	0	-10000000	5650.02;6751.88;7803.59;700.572;3083.71;423.623;2235.8;1421.66;766.252;48.943;4931.7;135.017;
Z:\MS_data\7600_ZenoTof\2022\202210\20221012_MS_DC24_VACV_zenoSWATH_thermostability\20221010_MS_zenoSWATH_DC24_VACV_49C_r3-MS_DC24_VACV_zenoSWATH_49C_r3.mzML	20221010_MS_zenoSWATH_DC24_VACV_49C_r3-MS_DC24_VACV_zenoSWATH_49C_r3	49C_r3	P61982	P61982	1433G_MOUSE	Ywhag	1503.2	1160.84	1881.35	1503.2	1160.84	1881.35	1881.35	AAM(UniMod:35)KNVTEL	AAMKNVTEL	AAM(UniMod:35)KNVTEL2	2	0.000940734	0.0108658	0.00223214	0.00446429	0.00425532	0.00214592	0.00454545	0	1	1503.2	1160.84	1190.77	2591.79	0.117064	12.7028	12.6491	12.7833	-9.53719	12.6964	-9.5288	14-3-3 protein gamma	0.000725216	0.00096432	0.69804	3271.81	2.96178	0.518846	4.33719	0.997539	0	-10000000	1434.17;1154.74;2764.6;134.464;839.559;210.226;485.298;60.0284;186.452;43.3697;1009.94;133.416;
Z:\MS_data\7600_ZenoTof\2022\202210\20221012_MS_DC24_VACV_zenoSWATH_thermostability\20221010_MS_zenoSWATH_DC24_VACV_53C_r1-MS_DC24_VACV_zenoSWATH_53C_r1.mzML	20221010_MS_zenoSWATH_DC24_VACV_53C_r1-MS_DC24_VACV_zenoSWATH_53C_r1	53C_r1	P61982	P61982	1433G_MOUSE	Ywhag	8391.01	6541.07	4196.17	8391.01	6541.07	4196.17	4196.17	AAM(UniMod:35)KNVTEL	AAMKNVTEL	AAM(UniMod:35)KNVTEL2	2	0.000194408	0.000194408	0.00223214	0.00581395	0.00546448	0.00214592	0.00595238	0	1	8391.01	6541.07	8707.86	5872.2	0.914886	12.7031	12.5153	12.891	-9.53719	12.6854	-9.35073	14-3-3 protein gamma	0.000725216	0.00096432	0.97622	5658.53	4.231	0.264698	4.76714	0.999947	0	-10000000	1855.05;2627.59;4074.15;163.844;1804.24;270.292;1082.82;499.989;205.21;0;1264.2;45.0726;
Z:\MS_data\7600_ZenoTof\2022\202210\20221012_MS_DC24_VACV_zenoSWATH_thermostability\20221010_MS_zenoSWATH_DC24_VACV_53C_r2-MS_DC24_VACV_zenoSWATH_53C_r2.mzML	20221010_MS_zenoSWATH_DC24_VACV_53C_r2-MS_DC24_VACV_zenoSWATH_53C_r2	53C_r2	P61982	P61982	1433G_MOUSE	Ywhag	7100.79	5705.17	7662.01	7100.79	5705.17	7662.01	7662.01	AAM(UniMod:35)KNVTEL	AAMKNVTEL	AAM(UniMod:35)KNVTEL2	2	0.00102775	0.00256378	0.00223214	0.0052356	0.00495049	0.00214592	0.00534759	0	1	7100.79	5705.17	5420.23	8168.51	0.680765	12.7832	12.6221	12.8369	-9.53719	12.724	-9.31794	14-3-3 protein gamma	0.000725216	0.00096432	0.91213	10701.2	4.40374	0.606529	5.86403	0.999265	0	-10000000	3761.79;5792.79;6092.69;244.974;3000.59;921.163;2470.4;1429.49;764.563;0;4227.5;408.256;
Z:\MS_data\7600_ZenoTof\2022\202210\20221012_MS_DC24_VACV_zenoSWATH_thermostability\20221010_MS_zenoSWATH_DC24_VACV_53C_r3-MS_DC24_VACV_zenoSWATH_53C_r3.mzML	20221010_MS_zenoSWATH_DC24_VACV_53C_r3-MS_DC24_VACV_zenoSWATH_53C_r3	53C_r3	P61982	P61982	1433G_MOUSE	Ywhag	4730.87	7039.13	3226.6	4730.87	7039.13	3226.6	3226.6	AAM(UniMod:35)KNVTEL	AAMKNVTEL	AAM(UniMod:35)KNVTEL2	2	0.00117509	0.00297145	0.00223214	0.00854701	0.0078125	0.00214592	0.00877193	0	1	4730.87	7039.13	5281.91	6144.56	0.753742	12.7296	12.5686	12.8906	-9.53719	12.6903	-9.37821	14-3-3 protein gamma	0.000725216	0.00096432	0.978262	5503.53	3.3975	0.639521	5.34199	0.999339	0	-10000000	2040.88;2875.71;3026.51;98.9848;1608.85;288.479;374.626;449.466;215.902;0;1710.29;85.3372;
Z:\MS_data\7600_ZenoTof\2022\202210\20221012_MS_DC24_VACV_zenoSWATH_thermostability\20221010_MS_zenoSWATH_DC24_VACV_57C_r1-MS_DC24_VACV_zenoSWATH_57C_r1.mzML	20221010_MS_zenoSWATH_DC24_VACV_57C_r1-MS_DC24_VACV_zenoSWATH_57C_r1	57C_r1	P61982	P61982	1433G_MOUSE	Ywhag	2296.73	3399.28	2061.29	2296.73	3399.28	2061.29	2061.29	AAM(UniMod:35)KNVTEL	AAMKNVTEL	AAM(UniMod:35)KNVTEL2	2	0.00894454	0.272065	0.00223214	0.0128205	0.011236	0.00214592	0.0133333	0	1	198.868	294.335	175.689	558.385	0.712614	12.6763	12.6226	12.7836	-9.53719	12.4508	-8.72388	14-3-3 protein gamma	0.000725216	0.00096432	0.802282	632.051	2.0959	0.00959162	2.40177	0.858728	0	-10000000	0;127.51;147.775;0;54.8471;46.7174;0;22.7437;0;0;178.187;142.23;
Z:\MS_data\7600_ZenoTof\2022\202210\20221012_MS_DC24_VACV_zenoSWATH_thermostability\20221010_MS_zenoSWATH_DC24_VACV_57C_r1-MS_DC24_VACV_zenoSWATH_57C_r1.mzML	20221010_MS_zenoSWATH_DC24_VACV_57C_r1-MS_DC24_VACV_zenoSWATH_57C_r1	57C_r1	Q99L47	Q99L47	F10A1_MOUSE	St13	787.155	1165.03	1165.03	787.155	1165.03	1165.03	1165.03	AAM(UniMod:35)QDPEVM(UniMod:35)	AAMQDPEVM	AAM(UniMod:35)QDPEVM(UniMod:35)2	2	0.00238621	0.00238621	0.119006	0.0655738	0.06621	1	0.0636792	0	1	787.155	1165.03	695.412	392.494	0.613432	15.6563	15.5757	15.7636	2.55927	15.7148	2.28315	Hsc70-interacting protein	0.00887022	0.00835655	0.899681	444.274	2.09522	0.509776	1.63183	0.998559	0	-10000000	469.801;754.872;52.6347;116.792;0;328.319;0;0;0;0;55.2315;0;
Z:\MS_data\7600_ZenoTof\2022\202210\20221012_MS_DC24_VACV_zenoSWATH_thermostability\20221010_MS_zenoSWATH_DC24_VACV_57C_r3-MS_DC24_VACV_zenoSWATH_57C_r3.mzML	20221010_MS_zenoSWATH_DC24_VACV_57C_r3-MS_DC24_VACV_zenoSWATH_57C_r3	57C_r3	Q99L47	Q99L47	F10A1_MOUSE	St13	911.871	1669.56	1669.56	911.871	1669.56	1669.56	1669.56	AAM(UniMod:35)QDPEVM(UniMod:35)	AAMQDPEVM	AAM(UniMod:35)QDPEVM(UniMod:35)2	2	0.002457	0.00371094	0.119006	0.0670391	0.0704607	1	0.0676056	0	1	911.871	1669.56	967.247	519.934	0.788134	15.683	15.6025	15.7635	2.55927	15.6691	2.62335	Hsc70-interacting protein	0.00887022	0.00835655	0.671335	490.167	2.29544	0.224962	1.73552	0.997794	0	-10000000	686.042;575.326;289.086;46.7166;0;683.9;0;0;0;0;0;0;
Z:\MS_data\7600_ZenoTof\2022\202210\20221012_MS_DC24_VACV_zenoSWATH_thermostability\20221010_MS_zenoSWATH_DC24_VACV_61C_r1-MS_DC24_VACV_zenoSWATH_61C_r1.mzML	20221010_MS_zenoSWATH_DC24_VACV_61C_r1-MS_DC24_VACV_zenoSWATH_61C_r1	61C_r1	Q99L47	Q99L47	F10A1_MOUSE	St13	316.289	249.677	249.677	316.289	249.677	249.677	249.677	AAM(UniMod:35)QDPEVM(UniMod:35)	AAMQDPEVM	AAM(UniMod:35)QDPEVM(UniMod:35)2	2	0.00361011	0.111228	0.119006	0.0731707	0.0771812	1	0.0736842	0	1	316.289	249.677	200.622	179.01	0.536994	15.6824	15.6288	15.8166	2.55927	15.6837	2.54935	Hsc70-interacting protein	0.00887022	0.00835655	0.579355	282.217	1.78168	0.536901	1.58014	0.912367	0.990016	0.460883	488.121;143.723;123.084;0;18.4288;978.347;0;0;0;0;0;0;
Z:\MS_data\7600_ZenoTof\2022\202210\20221012_MS_DC24_VACV_zenoSWATH_thermostability\20221010_MS_zenoSWATH_DC24_VACV_61C_r2-MS_DC24_VACV_zenoSWATH_61C_r2.mzML	20221010_MS_zenoSWATH_DC24_VACV_61C_r2-MS_DC24_VACV_zenoSWATH_61C_r2	61C_r2	Q99L47	Q99L47	F10A1_MOUSE	St13	103.37	86.9275	0	103.37	86.9275			AAM(UniMod:35)QDPEVM(UniMod:35)	AAMQDPEVM	AAM(UniMod:35)QDPEVM(UniMod:35)2	2	0.0459459	0.599527	0.119006	0.0781893	0.0748032	1	0.0788382	0	1	103.37	86.9275	65.7809	28.78	0.826385	15.6825	15.6288	15.7362	2.55927	15.6958	2.46244	Hsc70-interacting protein	0.00887022	0.00835655	0.191257	45.2255	0.866777	0.058574	0.985897	0.664197	0	-10000000	103.37;243.154;0;0;0;51.3712;0;81.3615;0;0;0;0;
Z:\MS_data\7600_ZenoTof\2022\202210\20221012_MS_DC24_VACV_zenoSWATH_thermostability\20221010_MS_zenoSWATH_DC24_VACV_61C_r3-MS_DC24_VACV_zenoSWATH_61C_r3.mzML	20221010_MS_zenoSWATH_DC24_VACV_61C_r3-MS_DC24_VACV_zenoSWATH_61C_r3	61C_r3	Q99L47	Q99L47	F10A1_MOUSE	St13	612.224	655.711	655.711	612.224	655.711	655.711	655.711	AAM(UniMod:35)QDPEVM(UniMod:35)	AAMQDPEVM	AAM(UniMod:35)QDPEVM(UniMod:35)2	2	0.00460829	0.0952803	0.119006	0.0717703	0.0818182	1	0.0728155	0	1	612.224	655.711	405.786	255.233	0.869587	15.6558	15.5753	15.7632	2.55927	15.6336	2.59979	Hsc70-interacting protein	0.00887022	0.00835655	0.681616	385.079	2.19899	0.333396	1.61116	0.925784	0	-10000000	254.465;191.269;523.918;0;0;563.076;0;0;0;0;110.465;0;
Z:\MS_data\7600_ZenoTof\2022\202210\20221012_MS_DC24_VACV_zenoSWATH_thermostability\20221010_MS_zenoSWATH_DC24_VACV_37C_r1-MS_DC24_VACV_zenoSWATH_37C_r1.mzML	20221010_MS_zenoSWATH_DC24_VACV_37C_r1-MS_DC24_VACV_zenoSWATH_37C_r1	37C_r1	P61982	P61982	1433G_MOUSE	Ywhag	11864.3	4441.74	2738.2	11864.3	4441.74	2738.2	2738.2	AAMKNVTEL	AAMKNVTEL	AAMKNVTEL2	2	0.00101626	0.153006	0.00223214	0.00294985	0.00285714	0.00214592	0.00299401	0	1	1075.11	402.496	785.763	382.872	0.749515	17.9636	17.8831	18.0442	11.1372	17.9101	11.3637	14-3-3 protein gamma	0.00031964	0.00096432	0.824949	523.859	2.27823	0.577411	0.281659	0.952523	0	-10000000	241.287;680.106;436.624;166.382;0;0;0;0;0;0;0;0;
Z:\MS_data\7600_ZenoTof\2022\202210\20221012_MS_DC24_VACV_zenoSWATH_thermostability\20221010_MS_zenoSWATH_DC24_VACV_37C_r2-MS_DC24_VACV_zenoSWATH_37C_r2.mzML	20221010_MS_zenoSWATH_DC24_VACV_37C_r2-MS_DC24_VACV_zenoSWATH_37C_r2	37C_r2	P61982	P61982	1433G_MOUSE	Ywhag	8013.24	4197.03	6319.42	8013.24	4197.03	6319.42	6319.42	AAMKNVTEL	AAMKNVTEL	AAMKNVTEL2	2	0.00051823	0.00051823	0.00223214	0.00294985	0.00285714	0.00214592	0.00298507	0	1	8013.24	4197.03	5845.24	3535.83	0.830027	17.9092	17.7482	18.0434	11.1372	17.8615	11.3499	14-3-3 protein gamma	0.00031964	0.00096432	0.961164	4847.26	3.94712	0.522868	3.21611	0.999858	0	-10000000	1621.21;2617.1;5384.48;1524.04;455.821;732.88;541.19;0;15.127;0;122.072;0;
Z:\MS_data\7600_ZenoTof\2022\202210\20221012_MS_DC24_VACV_zenoSWATH_thermostability\20221010_MS_zenoSWATH_DC24_VACV_37C_r3-MS_DC24_VACV_zenoSWATH_37C_r3.mzML	20221010_MS_zenoSWATH_DC24_VACV_37C_r3-MS_DC24_VACV_zenoSWATH_37C_r3	37C_r3	P61982	P61982	1433G_MOUSE	Ywhag	6180.79	2822.86	1671.42	6180.79	2822.86	1671.42	1671.42	AAMKNVTEL	AAMKNVTEL	AAMKNVTEL2	2	0.000596659	0.0305503	0.00223214	0.00310559	0.003003	0.00214592	0.00314465	0	1	518.799	236.944	396.533	465.783	0.759177	17.9363	17.8289	18.0168	11.1372	17.9202	11.2178	14-3-3 protein gamma	0.00031964	0.00096432	0.665962	609.401	2.23407	0.513591	2.07695	0.991262	0	-10000000	70.9523;366.267;540.015;242.217;0;0;0;0;0;0;0;0;
Z:\MS_data\7600_ZenoTof\2022\202210\20221012_MS_DC24_VACV_zenoSWATH_thermostability\20221010_MS_zenoSWATH_DC24_VACV_41C_r1-MS_DC24_VACV_zenoSWATH_41C_r1.mzML	20221010_MS_zenoSWATH_DC24_VACV_41C_r1-MS_DC24_VACV_zenoSWATH_41C_r1	41C_r1	P61982	P61982	1433G_MOUSE	Ywhag	11626	4971.51	7083.76	11626	4971.51	7083.76	7083.76	AAMKNVTEL	AAMKNVTEL	AAMKNVTEL2	2	0.000272698	0.000272698	0.00223214	0.00303951	0.00294118	0.00214592	0.00307692	0	1	5630.46	2407.69	4383.14	1932.16	0.862249	17.937	17.8297	18.0713	11.1372	17.9121	11.2455	14-3-3 protein gamma	0.00031964	0.00096432	0.977176	2482	4.07562	0.421776	3.11539	0.999907	0	-10000000	762.496;2075.69;4438.32;1959.51;157.802;607.92;139.258;0;0;0;0;0;
Z:\MS_data\7600_ZenoTof\2022\202210\20221012_MS_DC24_VACV_zenoSWATH_thermostability\20221010_MS_zenoSWATH_DC24_VACV_41C_r2-MS_DC24_VACV_zenoSWATH_41C_r2.mzML	20221010_MS_zenoSWATH_DC24_VACV_41C_r2-MS_DC24_VACV_zenoSWATH_41C_r2	41C_r2	P61982	P61982	1433G_MOUSE	Ywhag	12189.5	5742.26	7511.41	12189.5	5742.26	7511.41	7511.41	AAMKNVTEL	AAMKNVTEL	AAMKNVTEL2	2	0.000254229	0.000254229	0.00223214	0.00290698	0.0028169	0.00214592	0.00294985	0	1	4978.2	2345.14	3513.1	2126.87	0.630911	17.9361	17.802	18.0703	11.1372	17.9117	11.2366	14-3-3 protein gamma	0.00031964	0.00096432	0.9523	3013.87	3.37321	0.625432	4.16194	0.999929	0	-10000000	1377.75;2076.73;4047.27;1059.7;353.217;329.161;410.132;24.3275;461.275;0;22.077;0;
Z:\MS_data\7600_ZenoTof\2022\202210\20221012_MS_DC24_VACV_zenoSWATH_thermostability\20221010_MS_zenoSWATH_DC24_VACV_41C_r3-MS_DC24_VACV_zenoSWATH_41C_r3.mzML	20221010_MS_zenoSWATH_DC24_VACV_41C_r3-MS_DC24_VACV_zenoSWATH_41C_r3	41C_r3	P61982	P61982	1433G_MOUSE	Ywhag	12225	6020.82	4581.44	12225	6020.82	4581.44	4581.44	AAMKNVTEL	AAMKNVTEL	AAMKNVTEL2	2	0.00019923	0.00019923	0.00223214	0.00284091	0.00275482	0.00214592	0.00288184	0	1	1687.09	830.891	1290.05	1475.95	0.671925	17.936	17.8286	18.0702	11.1372	17.9063	11.2377	14-3-3 protein gamma	0.00031964	0.00096432	0.931128	1930.2	3.07268	0.562045	3.39262	0.999947	0	-10000000	733.581;1055.54;2133;539.609;224.351;307.598;32.6242;32.4362;218.849;0;0;0;
Z:\MS_data\7600_ZenoTof\2022\202210\20221012_MS_DC24_VACV_zenoSWATH_thermostability\20221010_MS_zenoSWATH_DC24_VACV_45C_r1-MS_DC24_VACV_zenoSWATH_45C_r1.mzML	20221010_MS_zenoSWATH_DC24_VACV_45C_r1-MS_DC24_VACV_zenoSWATH_45C_r1	45C_r1	P61982	P61982	1433G_MOUSE	Ywhag	8994.09	3510.95	4005.09	8994.09	3510.95	4005.09	4005.09	AAMKNVTEL	AAMKNVTEL	AAMKNVTEL2	2	0.000197619	0.000197619	0.00223214	0.00296736	0.00287356	0.00214592	0.00301205	0	1	1055.52	412.036	814.573	1138.79	-0.112987	17.9363	17.8558	18.0168	11.1372	17.9226	11.1948	14-3-3 protein gamma	0.00031964	0.00096432	0.808112	1475.64	2.83579	0.55831	2.39529	0.999934	1.09317	0.174925	655.097;649.424;2392.18;540.459;58.5358;317.99;0;0;0;0;0;0;
Z:\MS_data\7600_ZenoTof\2022\202210\20221012_MS_DC24_VACV_zenoSWATH_thermostability\20221010_MS_zenoSWATH_DC24_VACV_45C_r2-MS_DC24_VACV_zenoSWATH_45C_r2.mzML	20221010_MS_zenoSWATH_DC24_VACV_45C_r2-MS_DC24_VACV_zenoSWATH_45C_r2	45C_r2	P61982	P61982	1433G_MOUSE	Ywhag	5925.75	3918.2	5123.56	5925.75	3918.2	5123.56	5123.56	AAMKNVTEL	AAMKNVTEL	AAMKNVTEL2	2	0.000761615	0.00110584	0.00223214	0.00342466	0.00330033	0.00214592	0.00348432	0	1	2417.67	1598.6	1999.25	1650.05	0.75556	17.9098	17.8024	18.044	11.1372	17.901	11.1665	14-3-3 protein gamma	0.00031964	0.00096432	0.846603	1995.38	2.90486	0.541195	2.16979	0.999758	0	-10000000	910.477;811.714;1689.26;704.289;0;115.349;141.495;0;0;0;0;0;
Z:\MS_data\7600_ZenoTof\2022\202210\20221012_MS_DC24_VACV_zenoSWATH_thermostability\20221010_MS_zenoSWATH_DC24_VACV_45C_r3-MS_DC24_VACV_zenoSWATH_45C_r3.mzML	20221010_MS_zenoSWATH_DC24_VACV_45C_r3-MS_DC24_VACV_zenoSWATH_45C_r3	45C_r3	P61982	P61982	1433G_MOUSE	Ywhag	14820	6073.92	5342.66	14820	6073.92	5342.66	5342.66	AAMKNVTEL	AAMKNVTEL	AAMKNVTEL2	2	9.01287e-05	9.01287e-05	0.00223214	0.00304878	0.00294985	0.00214592	0.00308642	0	1	2735.05	1120.95	2096.46	1172.77	0.823605	17.9366	17.8561	18.0708	11.1372	17.9076	11.2294	14-3-3 protein gamma	0.00031964	0.00096432	0.897066	1530	3.26539	0.482974	3.07484	0.999972	0	-10000000	335.323;1660.4;1971.22;982.724;64.0995;94.3054;15.1002;74.1169;78.9747;134.411;0;0;
Z:\MS_data\7600_ZenoTof\2022\202210\20221012_MS_DC24_VACV_zenoSWATH_thermostability\20221010_MS_zenoSWATH_DC24_VACV_49C_r1-MS_DC24_VACV_zenoSWATH_49C_r1.mzML	20221010_MS_zenoSWATH_DC24_VACV_49C_r1-MS_DC24_VACV_zenoSWATH_49C_r1	49C_r1	P61982	P61982	1433G_MOUSE	Ywhag	2058.94	1534.53	1957.81	2058.94	1534.53	1957.81	1957.81	AAMKNVTEL	AAMKNVTEL	AAMKNVTEL2	2	0.000897666	0.0285641	0.00223214	0.00505051	0.00478469	0.00214592	0.00512821	0	1	799.731	596.041	627.426	1092.29	0.702804	17.9645	17.8302	18.045	11.1372	17.9035	11.3587	14-3-3 protein gamma	0.00031964	0.00096432	0.91686	1392.26	2.39527	0.353868	2.0556	0.992188	0	-10000000	258.297;409.527;987.467;204.865;0;125.482;105.889;0;111.979;0;37.8464;0;
Z:\MS_data\7600_ZenoTof\2022\202210\20221012_MS_DC24_VACV_zenoSWATH_thermostability\20221010_MS_zenoSWATH_DC24_VACV_49C_r2-MS_DC24_VACV_zenoSWATH_49C_r2.mzML	20221010_MS_zenoSWATH_DC24_VACV_49C_r2-MS_DC24_VACV_zenoSWATH_49C_r2	49C_r2	P61982	P61982	1433G_MOUSE	Ywhag	15610.7	9335.08	8439.4	15610.7	9335.08	8439.4	8439.4	AAMKNVTEL	AAMKNVTEL	AAMKNVTEL2	2	0.000857633	0.00140048	0.00223214	0.00395257	0.00378788	0.00214592	0.00401606	0	1	3043.18	1819.8	2612.77	2406.31	0.776673	17.9362	17.8289	18.0973	11.1372	17.9273	11.1766	14-3-3 protein gamma	0.00031964	0.00096432	0.929385	2802.72	3.2579	0.442315	2.68465	0.999646	0	-10000000	735.765;1117.42;2926.79;917.076;16.9152;69.8845;154.358;12.1637;0;0;44.8958;0;
Z:\MS_data\7600_ZenoTof\2022\202210\20221012_MS_DC24_VACV_zenoSWATH_thermostability\20221010_MS_zenoSWATH_DC24_VACV_49C_r3-MS_DC24_VACV_zenoSWATH_49C_r3.mzML	20221010_MS_zenoSWATH_DC24_VACV_49C_r3-MS_DC24_VACV_zenoSWATH_49C_r3	49C_r3	P61982	P61982	1433G_MOUSE	Ywhag	1503.2	1160.84	1881.35	1503.2	1160.84	1881.35	1881.35	AAMKNVTEL	AAMKNVTEL	AAMKNVTEL2	2	0.000940734	0.014275	0.00223214	0.00446429	0.00425532	0.00214592	0.00454545	0	1	930.928	718.903	737.443	1108.55	0.572006	17.9368	17.8831	18.0442	11.1372	17.9244	11.1804	14-3-3 protein gamma	0.00031964	0.00096432	0.819106	1399.41	2.48588	0.515994	1.70554	0.996769	0	-10000000	285.267;1153.34;1243.23;497.731;0;346.04;62.8244;10.3797;0;0;0;0;
Z:\MS_data\7600_ZenoTof\2022\202210\20221012_MS_DC24_VACV_zenoSWATH_thermostability\20221010_MS_zenoSWATH_DC24_VACV_53C_r1-MS_DC24_VACV_zenoSWATH_53C_r1.mzML	20221010_MS_zenoSWATH_DC24_VACV_53C_r1-MS_DC24_VACV_zenoSWATH_53C_r1	53C_r1	P61982	P61982	1433G_MOUSE	Ywhag	8391.01	6541.07	4196.17	8391.01	6541.07	4196.17	4196.17	AAMKNVTEL	AAMKNVTEL	AAMKNVTEL2	2	0.000898473	0.0315898	0.00223214	0.00581395	0.00546448	0.00214592	0.00595238	0	1	824.284	642.556	855.409	1049.52	0.914324	17.9637	17.8563	18.0443	11.1372	17.9128	11.3303	14-3-3 protein gamma	0.00031964	0.00096432	0.833707	1011.33	2.46604	0.404131	2.52861	0.991472	0	-10000000	486.215;110.902;792.076;165.532;0;0;0;20.597;0;0;0;0;
Z:\MS_data\7600_ZenoTof\2022\202210\20221012_MS_DC24_VACV_zenoSWATH_thermostability\20221010_MS_zenoSWATH_DC24_VACV_53C_r2-MS_DC24_VACV_zenoSWATH_53C_r2.mzML	20221010_MS_zenoSWATH_DC24_VACV_53C_r2-MS_DC24_VACV_zenoSWATH_53C_r2	53C_r2	P61982	P61982	1433G_MOUSE	Ywhag	7100.79	5705.17	7662.01	7100.79	5705.17	7662.01	7662.01	AAMKNVTEL	AAMKNVTEL	AAMKNVTEL2	2	0.00102775	0.0039241	0.00223214	0.0052356	0.00495049	0.00214592	0.00534759	0	1	3053.1	2453.03	2330.52	1405.27	0.83409	17.9632	17.8558	18.0438	11.1372	17.9152	11.319	14-3-3 protein gamma	0.00031964	0.00096432	0.948728	1840.98	3.34021	0.471457	2.63349	0.998875	0	-10000000	874.029;1094.61;1775.55;461.512;0;134.315;122.853;0;68.5622;0;0;0;
Z:\MS_data\7600_ZenoTof\2022\202210\20221012_MS_DC24_VACV_zenoSWATH_thermostability\20221010_MS_zenoSWATH_DC24_VACV_53C_r3-MS_DC24_VACV_zenoSWATH_53C_r3.mzML	20221010_MS_zenoSWATH_DC24_VACV_53C_r3-MS_DC24_VACV_zenoSWATH_53C_r3	53C_r3	P61982	P61982	1433G_MOUSE	Ywhag	4730.87	7039.13	3226.6	4730.87	7039.13	3226.6	3226.6	AAMKNVTEL	AAMKNVTEL	AAMKNVTEL2	2	0.00117509	0.116614	0.00223214	0.00854701	0.0078125	0.00214592	0.00877193	0	1	236.866	352.437	264.456	450.686	0.683544	17.9631	17.9094	18.0705	11.1372	17.9029	11.3726	14-3-3 protein gamma	0.00031964	0.00096432	0.701107	403.668	1.30187	0.187359	1.10057	0.974709	0	-10000000	212.856;218.135;341.495;43.2932;0;0;0;0;55.7923;0;0;0;
Z:\MS_data\7600_ZenoTof\2022\202210\20221012_MS_DC24_VACV_zenoSWATH_thermostability\20221010_MS_zenoSWATH_DC24_VACV_57C_r1-MS_DC24_VACV_zenoSWATH_57C_r1.mzML	20221010_MS_zenoSWATH_DC24_VACV_57C_r1-MS_DC24_VACV_zenoSWATH_57C_r1	57C_r1	P61982	P61982	1433G_MOUSE	Ywhag	2296.73	3399.28	2061.29	2296.73	3399.28	2061.29	2061.29	AAMKNVTEL	AAMKNVTEL	AAMKNVTEL2	2	0.00146044	0.00146044	0.00223214	0.0128205	0.011236	0.00214592	0.0133333	0	1	2296.73	3399.28	2029.04	1506.65	0.941921	17.9368	17.8025	18.0709	11.1372	17.9289	11.1697	14-3-3 protein gamma	0.00031964	0.00096432	0.885506	1705.41	2.93008	0.388957	2.03511	0.999118	0	-10000000	167.662;569.195;2013.66;348.892;0;0;98.4309;0;62.6695;254.379;0;0;
Z:\MS_data\7600_ZenoTof\2022\202210\20221012_MS_DC24_VACV_zenoSWATH_thermostability\20221010_MS_zenoSWATH_DC24_VACV_57C_r3-MS_DC24_VACV_zenoSWATH_57C_r3.mzML	20221010_MS_zenoSWATH_DC24_VACV_57C_r3-MS_DC24_VACV_zenoSWATH_57C_r3	57C_r3	P61982	P61982	1433G_MOUSE	Ywhag	603.608	1105.16	3992.71	603.608	1105.16	3992.71	3992.71	AAMKNVTEL	AAMKNVTEL	AAMKNVTEL2	2	0.002457	0.038596	0.00223214	0.0291262	0.0277778	0.00214592	0.0295567	0	1	603.608	1105.16	640.264	583.004	0.872032	17.9635	17.9098	18.044	11.1372	17.9325	11.2488	14-3-3 protein gamma	0.00031964	0.00096432	0.765207	549.627	2.17315	0.143936	0.997166	0.977523	0	-10000000	70.9524;214.465;457.419;337.574;0;0;0;0;0;0;0;0;
Z:\MS_data\7600_ZenoTof\2022\202210\20221012_MS_DC24_VACV_zenoSWATH_thermostability\20221010_MS_zenoSWATH_DC24_VACV_41C_r1-MS_DC24_VACV_zenoSWATH_41C_r1.mzML	20221010_MS_zenoSWATH_DC24_VACV_41C_r1-MS_DC24_VACV_zenoSWATH_41C_r1	41C_r1	Q8CCJ3	Q8CCJ3	UFL1_MOUSE	Ufl1	24.9188	10.6557	10.6557	24.9188	10.6557	10.6557	10.6557	AAMLLQQVM	AAMLLQQVM	AAMLLQQVM2	2	0.00293112	0.344018	0.0987167	0.021555	0.021374	1	0.0216886	0	1	24.9188	10.6557	19.3985	460.288	0.621035	35.2501	35.1696	35.3575	77.4856	35.334	77.1862	E3 UFM1-protein ligase 1	0.00641026	0.0113154	0.674817	591.275	2.00429	0.288401	0	0.895487	1.41301	0.282209	125.529;82.1133;0;71.6988;363.97;0;0;0;887.11;125.777;0;0;
Z:\MS_data\7600_ZenoTof\2022\202210\20221012_MS_DC24_VACV_zenoSWATH_thermostability\20221010_MS_zenoSWATH_DC24_VACV_45C_r1-MS_DC24_VACV_zenoSWATH_45C_r1.mzML	20221010_MS_zenoSWATH_DC24_VACV_45C_r1-MS_DC24_VACV_zenoSWATH_45C_r1	45C_r1	Q8CCJ3	Q8CCJ3	UFL1_MOUSE	Ufl1	130.582	50.9744	50.9744	130.582	50.9744	50.9744	50.9744	AAMLLQQVM	AAMLLQQVM	AAMLLQQVM2	2	0.00410256	0.287332	0.0987167	0.021652	0.0214626	1	0.0217918	0	1	130.582	50.9744	100.774	22.3744	0.801784	35.2756	35.2219	35.3293	77.4856	35.3854	77.2082	E3 UFM1-protein ligase 1	0.00641026	0.0113154	0	28.9927	1.06741	0.464303	0	0.912529	0	-10000000	89.5257;54.7422;0;0;202.057;0;0;135.074;868.172;0;0;0;
Z:\MS_data\7600_ZenoTof\2022\202210\20221012_MS_DC24_VACV_zenoSWATH_thermostability\20221010_MS_zenoSWATH_DC24_VACV_49C_r1-MS_DC24_VACV_zenoSWATH_49C_r1.mzML	20221010_MS_zenoSWATH_DC24_VACV_49C_r1-MS_DC24_VACV_zenoSWATH_49C_r1	49C_r1	Q8CCJ3	Q8CCJ3	UFL1_MOUSE	Ufl1	208.233	155.196	155.196	208.233	155.196	155.196	155.196	AAMLLQQVM	AAMLLQQVM	AAMLLQQVM2	2	0.000897666	0.0328815	0.0987167	0.0290023	0.0297824	1	0.0292056	0	1	208.233	155.196	163.368	590.534	0.723638	35.1978	35.1172	35.3588	77.4856	35.3696	76.8167	E3 UFM1-protein ligase 1	0.00641026	0.0113154	0.774342	752.708	1.75199	0.323679	0.871621	0.991018	0	-10000000	111.906;171.743;223.486;82.2576;282.877;0;0;109.389;2960.78;0;0;0;
Z:\MS_data\7600_ZenoTof\2022\202210\20221012_MS_DC24_VACV_zenoSWATH_thermostability\20221010_MS_zenoSWATH_DC24_VACV_37C_r1-MS_DC24_VACV_zenoSWATH_37C_r1.mzML	20221010_MS_zenoSWATH_DC24_VACV_37C_r1-MS_DC24_VACV_zenoSWATH_37C_r1	37C_r1	P20152	P20152	VIME_MOUSE	Vim	3520.21	1317.89	6329.79	3520.21	1317.89	6329.79	6329.79	AANRNNDAL	AANRNNDAL	AANRNNDAL2	2	0.000590319	0.00602967	0.00418994	0.00294985	0.00285714	0.00214592	0.00299401	0	1	549.27	205.634	401.444	628.648	0.819334	6.42143	6.31403	6.50195	-32.6667	6.235	-31.9538	Vimentin	0.00129282	0.00096432	0.913929	860.139	2.48774	0.49564	0	0.99804	0	-10000000	485.719;378.408;368.656;0;0;133.57;0;0;0;0;0;0;
Z:\MS_data\7600_ZenoTof\2022\202210\20221012_MS_DC24_VACV_zenoSWATH_thermostability\20221010_MS_zenoSWATH_DC24_VACV_37C_r2-MS_DC24_VACV_zenoSWATH_37C_r2.mzML	20221010_MS_zenoSWATH_DC24_VACV_37C_r2-MS_DC24_VACV_zenoSWATH_37C_r2	37C_r2	P20152	P20152	VIME_MOUSE	Vim	5628.31	2947.89	13710.2	5628.31	2947.89	13710.2	13710.2	AANRNNDAL	AANRNNDAL	AANRNNDAL2	2	0.0211827	1	0.00418994	0.00294985	0.00285714	0.00214592	0.00298507	0	1	128.2	67.1464	93.5155	204.395	0.801784	6.26028	6.2066	6.31397	-32.6667	6.16014	-32.668	Vimentin	0.00129282	0.00096432	0.215299	280.205	0.381097	0.466985	0	0.72908	0	-10000000	137.122;128.2;0;0;0;36.2832;0;0;0;0;0;0;
Z:\MS_data\7600_ZenoTof\2022\202210\20221012_MS_DC24_VACV_zenoSWATH_thermostability\20221010_MS_zenoSWATH_DC24_VACV_37C_r3-MS_DC24_VACV_zenoSWATH_37C_r3.mzML	20221010_MS_zenoSWATH_DC24_VACV_37C_r3-MS_DC24_VACV_zenoSWATH_37C_r3	37C_r3	P20152	P20152	VIME_MOUSE	Vim	2117.16	966.941	1108.84	2117.16	966.941	1108.84	1108.84	AANRNNDAL	AANRNNDAL	AANRNNDAL2	2	0.000596659	0.08664	0.00418994	0.00310559	0.003003	0.00214592	0.00314465	0	1	222.656	101.691	170.182	210.561	0.827926	6.3948	6.34113	6.47532	-32.6667	6.33736	-32.3721	Vimentin	0.00129282	0.00096432	0.628858	275.485	2.71215	0.0301071	2.54969	0.975611	0	-10000000	80.8178;179.765;32.4049;0;125.949;112.238;0;0;0;0;0;0;
Z:\MS_data\7600_ZenoTof\2022\202210\20221012_MS_DC24_VACV_zenoSWATH_thermostability\20221010_MS_zenoSWATH_DC24_VACV_41C_r1-MS_DC24_VACV_zenoSWATH_41C_r1.mzML	20221010_MS_zenoSWATH_DC24_VACV_41C_r1-MS_DC24_VACV_zenoSWATH_41C_r1	41C_r1	P20152	P20152	VIME_MOUSE	Vim	4978.95	2129.09	9770.96	4978.95	2129.09	9770.96	9770.96	AANRNNDAL	AANRNNDAL	AANRNNDAL2	2	0.000600601	0.0225181	0.00418994	0.00303951	0.00294118	0.00214592	0.00307692	0	1	632.074	270.287	492.05	582.072	0.745603	6.42202	6.28783	6.50253	-32.6667	6.19602	-31.8741	Vimentin	0.00129282	0.00096432	0.905962	747.715	2.11848	0.420154	0	0.992418	0	-10000000	421.604;522.67;207.393;0;0;0;0;0;0;0;0;0;
Z:\MS_data\7600_ZenoTof\2022\202210\20221012_MS_DC24_VACV_zenoSWATH_thermostability\20221010_MS_zenoSWATH_DC24_VACV_41C_r2-MS_DC24_VACV_zenoSWATH_41C_r2.mzML	20221010_MS_zenoSWATH_DC24_VACV_41C_r2-MS_DC24_VACV_zenoSWATH_41C_r2	41C_r2	P20152	P20152	VIME_MOUSE	Vim	7799.65	3674.26	16424.4	7799.65	3674.26	16424.4	16424.4	AANRNNDAL	AANRNNDAL	AANRNNDAL2	2	0.00066313	0.06942	0.00418994	0.00290698	0.0028169	0.00214592	0.00294985	0	1	902.231	425.023	636.7	652.421	0.845384	6.39473	6.26055	6.47525	-32.6667	6.17388	-31.9021	Vimentin	0.00129282	0.00096432	0.739815	924.508	2.20558	0.310112	0	0.980889	0	-10000000	598.864;515.907;303.655;0;0;84.927;0;105.935;0;0;0;0;
Z:\MS_data\7600_ZenoTof\2022\202210\20221012_MS_DC24_VACV_zenoSWATH_thermostability\20221010_MS_zenoSWATH_DC24_VACV_41C_r3-MS_DC24_VACV_zenoSWATH_41C_r3.mzML	20221010_MS_zenoSWATH_DC24_VACV_41C_r3-MS_DC24_VACV_zenoSWATH_41C_r3	41C_r3	P20152	P20152	VIME_MOUSE	Vim	1362.25	670.908	4006.04	1362.25	670.908	4006.04	4006.04	AANRNNDAL	AANRNNDAL	AANRNNDAL2	2	0.000596303	0.00645303	0.00418994	0.00284091	0.00275482	0.00214592	0.00288184	0	1	449.429	221.344	343.661	462.155	0.834134	6.42135	6.36768	6.52872	-32.6667	6.24262	-32.0323	Vimentin	0.00129282	0.00096432	0.758374	604.392	2.21545	0.823087	0.0758866	0.998285	0	-10000000	397.354;160.04;285.926;0;72.4905;84.9259;0;0;0;0;0;0;
Z:\MS_data\7600_ZenoTof\2022\202210\20221012_MS_DC24_VACV_zenoSWATH_thermostability\20221010_MS_zenoSWATH_DC24_VACV_45C_r1-MS_DC24_VACV_zenoSWATH_45C_r1.mzML	20221010_MS_zenoSWATH_DC24_VACV_45C_r1-MS_DC24_VACV_zenoSWATH_45C_r1	45C_r1	P20152	P20152	VIME_MOUSE	Vim	1925.92	751.807	2943.03	1925.92	751.807	2943.03	2943.03	AANRNNDAL	AANRNNDAL	AANRNNDAL2	2	0.00114613	0.105082	0.00418994	0.00296736	0.00287356	0.00214592	0.00301205	0	1	130.78	51.0515	100.926	459.471	0.41898	6.42155	6.36787	6.47523	-32.6667	6.24166	-32.0084	Vimentin	0.00129282	0.00096432	0.812007	595.382	2.65321	0.0292987	0	0.966131	0	-10000000	121.227;393.902;121.423;0;0;35.685;0;0;0;0;0;0;
Z:\MS_data\7600_ZenoTof\2022\202210\20221012_MS_DC24_VACV_zenoSWATH_thermostability\20221010_MS_zenoSWATH_DC24_VACV_45C_r3-MS_DC24_VACV_zenoSWATH_45C_r3.mzML	20221010_MS_zenoSWATH_DC24_VACV_45C_r3-MS_DC24_VACV_zenoSWATH_45C_r3	45C_r3	P20152	P20152	VIME_MOUSE	Vim	660.756	270.809	1399.14	660.756	270.809	1399.14	1399.14	AANRNNDAL	AANRNNDAL	AANRNNDAL2	2	0.00832517	0.898878	0.00418994	0.00304878	0.00294985	0.00214592	0.00308642	0	1	129.597	53.115	99.3383	205.737	0.801784	6.39477	6.3411	6.44845	-32.6667	6.36675	-32.0444	Vimentin	0.00129282	0.00096432	0.734069	268.405	1.34439	0.060475	0	0.781979	0	-10000000	21.5517;267.112;0;0;0;113.433;0;0;0;0;0;0;
Z:\MS_data\7600_ZenoTof\2022\202210\20221012_MS_DC24_VACV_zenoSWATH_thermostability\20221010_MS_zenoSWATH_DC24_VACV_49C_r2-MS_DC24_VACV_zenoSWATH_49C_r2.mzML	20221010_MS_zenoSWATH_DC24_VACV_49C_r2-MS_DC24_VACV_zenoSWATH_49C_r2	49C_r2	P20152	P20152	VIME_MOUSE	Vim	841.446	503.179	3670.64	841.446	503.179	3670.64	3670.64	AANRNNDAL	AANRNNDAL	AANRNNDAL2	2	0.00222222	0.109266	0.00418994	0.00689655	0.00664452	0.00214592	0.00699301	0	1	570.193	340.971	489.547	506.012	0.894335	6.4214	6.36773	6.50195	-32.6667	6.39939	-32.208	Vimentin	0.00129282	0.00096432	0.793049	589.37	2.17909	0.0677758	0	0.973101	0	-10000000	150.322;476.458;54.1351;0;0;159.486;0;0;0;0;0;0;
Z:\MS_data\7600_ZenoTof\2022\202210\20221012_MS_DC24_VACV_zenoSWATH_thermostability\20221010_MS_zenoSWATH_DC24_VACV_53C_r2-MS_DC24_VACV_zenoSWATH_53C_r2.mzML	20221010_MS_zenoSWATH_DC24_VACV_53C_r2-MS_DC24_VACV_zenoSWATH_53C_r2	53C_r2	P20152	P20152	VIME_MOUSE	Vim	0	0	0					AANRNNDAL	AANRNNDAL	AANRNNDAL2	2	0.00102775	0.0368995	0.00418994	0.0144	0.0141732	0.00214592	0.0145161	0	1	0	0	0	114.15	0	6.42125	6.36758	6.47497	-32.6667	6.25245	-32.0347	Vimentin	0.00129282	0.00096432	0.603682	149.543	1.31365	0.0722158	0	0.989521	0	-10000000	447.196;84.5289;54.1355;0;0;0;0;0;0;0;0;43.3526;
Z:\MS_data\7600_ZenoTof\2022\202210\20221012_MS_DC24_VACV_zenoSWATH_thermostability\20221010_MS_zenoSWATH_DC24_VACV_37C_r1-MS_DC24_VACV_zenoSWATH_37C_r1.mzML	20221010_MS_zenoSWATH_DC24_VACV_37C_r1-MS_DC24_VACV_zenoSWATH_37C_r1	37C_r1	Q9D7I0	Q9D7I0	SHSA5_MOUSE	Shisa5	6.77285	2.5356	0	6.77285	2.5356			AAPAPSLWTL	AAPAPSLWTL	AAPAPSLWTL2	2	0.04914	1	0.00418994	0.0481144	0.0484183	0.0120037	0.048366	0	1	6.77285	2.5356	4.95007	49.4944	0.520815	38.8472	38.7667	38.9009	90.3282	38.4714	91.8048	Protein shisa-5	0.00157109	0.00519031	0.812175	67.72	1.48916	0.163181	0.0395358	0.386697	1.38874	0.343714	0;25.1268;41.8159;0;140.255;282.516;142.403;0;447.3;0;0;0;
Z:\MS_data\7600_ZenoTof\2022\202210\20221012_MS_DC24_VACV_zenoSWATH_thermostability\20221010_MS_zenoSWATH_DC24_VACV_37C_r2-MS_DC24_VACV_zenoSWATH_37C_r2.mzML	20221010_MS_zenoSWATH_DC24_VACV_37C_r2-MS_DC24_VACV_zenoSWATH_37C_r2	37C_r2	Q9D7I0	Q9D7I0	SHSA5_MOUSE	Shisa5	2187.59	1145.78	1145.78	2187.59	1145.78	1145.78	1145.78	AAPAPSLWTL	AAPAPSLWTL	AAPAPSLWTL2	2	0.000575374	0.00440302	0.00418994	0.00836431	0.00827967	0.0120037	0.00841121	0	1	2187.59	1145.78	1595.74	308.698	0.637455	38.4701	38.3359	38.6044	90.3282	38.4605	90.359	Protein shisa-5	0.00157109	0.00519031	0	423.194	2.68783	0.368874	3.88457	0.998792	1.45233	0.520465	842.009;662.969;1023.8;3338.66;1647.72;171.997;1160.27;1218.23;201.28;982.929;0;110.96;
Z:\MS_data\7600_ZenoTof\2022\202210\20221012_MS_DC24_VACV_zenoSWATH_thermostability\20221010_MS_zenoSWATH_DC24_VACV_37C_r3-MS_DC24_VACV_zenoSWATH_37C_r3.mzML	20221010_MS_zenoSWATH_DC24_VACV_37C_r3-MS_DC24_VACV_zenoSWATH_37C_r3	37C_r3	Q9D7I0	Q9D7I0	SHSA5_MOUSE	Shisa5	55.2677	25.2416	25.2416	55.2677	25.2416	25.2416	25.2416	AAPAPSLWTL	AAPAPSLWTL	AAPAPSLWTL2	2	0.000596659	0.0854163	0.00418994	0.00836431	0.00827967	0.0120037	0.00748363	0	1	55.2677	25.2416	42.2427	0	0.801784	38.5235	38.4698	38.5772	90.3282	38.5016	90.4388	Protein shisa-5	0.00157109	0.00519031	0	0	0.607906	0.0913293	1.2549	0.975947	1.47668	0.300557	135.705;9.18098;48.382;155.213;414.14;0;255.52;178.22;293.708;327.443;0;0;
Z:\MS_data\7600_ZenoTof\2022\202210\20221012_MS_DC24_VACV_zenoSWATH_thermostability\20221010_MS_zenoSWATH_DC24_VACV_41C_r1-MS_DC24_VACV_zenoSWATH_41C_r1.mzML	20221010_MS_zenoSWATH_DC24_VACV_41C_r1-MS_DC24_VACV_zenoSWATH_41C_r1	41C_r1	Q9D7I0	Q9D7I0	SHSA5_MOUSE	Shisa5	1430.53	611.722	611.723	1430.53	611.722	611.723	611.723	AAPAPSLWTL	AAPAPSLWTL	AAPAPSLWTL2	2	0.000600601	0.00204365	0.00418994	0.00736648	0.00729262	0.0120037	0.00741427	0	1	1430.53	611.722	1113.62	1265.24	0.519149	38.4714	38.3103	38.6056	90.3282	38.4692	90.321	Protein shisa-5	0.00157109	0.00519031	0.0701786	1625.3	1.94872	0.443243	3.52139	0.999307	0.592327	0.186783	548.285;1021.74;942.079;2024.33;2415.81;102.457;1023.29;1292.39;551.992;420.384;0;0;
Z:\MS_data\7600_ZenoTof\2022\202210\20221012_MS_DC24_VACV_zenoSWATH_thermostability\20221010_MS_zenoSWATH_DC24_VACV_41C_r2-MS_DC24_VACV_zenoSWATH_41C_r2.mzML	20221010_MS_zenoSWATH_DC24_VACV_41C_r2-MS_DC24_VACV_zenoSWATH_41C_r2	41C_r2	Q9D7I0	Q9D7I0	SHSA5_MOUSE	Shisa5	1287.07	606.314	606.314	1287.07	606.314	606.314	606.314	AAPAPSLWTL	AAPAPSLWTL	AAPAPSLWTL2	2	0.00066313	0.0464686	0.00418994	0.00813008	0.00805009	0.0120037	0.00818182	0	1	1287.07	606.314	908.28	689.12	0.488094	38.4434	38.336	38.685	90.3282	38.4639	90.2193	Protein shisa-5	0.00157109	0.00519031	0.35155	976.512	1.74886	0.346963	3.0476	0.987126	0.787672	0.380326	480.28;1025.37;752.003;1483.7;2120.67;149.981;627.172;550.2;204.647;346.094;47.704;110.961;
Z:\MS_data\7600_ZenoTof\2022\202210\20221012_MS_DC24_VACV_zenoSWATH_thermostability\20221010_MS_zenoSWATH_DC24_VACV_41C_r3-MS_DC24_VACV_zenoSWATH_41C_r3.mzML	20221010_MS_zenoSWATH_DC24_VACV_41C_r3-MS_DC24_VACV_zenoSWATH_41C_r3	41C_r3	Q9D7I0	Q9D7I0	SHSA5_MOUSE	Shisa5	424	208.82	208.82	424	208.82	208.82	208.82	AAPAPSLWTL	AAPAPSLWTL	AAPAPSLWTL2	2	0.00209314	0.130044	0.00418994	0.00751174	0.00743494	0.0120037	0.00756144	0	1	424	208.82	324.216	0	0.690763	38.4691	38.3885	38.5227	90.3282	38.4932	90.2693	Protein shisa-5	0.00157109	0.00519031	0	0	1.39619	0.315902	1.42386	0.966531	1.44241	0.588655	99.5773;351.531;72.5737;600.926;268.087;62.7834;451.668;133.666;22.9582;0;0;0;
[truncated: 33,352 more rows]
[truncated: 7 more columns]
